# Supplementary material for: Synthesis and Vibrational Circular Dichroism Analysis of N-Heterocyclic Carbene Precursors Containing Remote Chirality Centers
Source: MDPI journal article supplement (doi:10.3390/ijms23073471), 2022-03-23
Supplement: s1 [file s1]

# Supporting Information

## Synthesis and vibrational circular dichroism analysis of *N*-heterocyclic carbene precursors containing remote chirality centers

Zita Szabó,<sup>†</sup> Attila Paczal,<sup>†</sup> Tibor Kovács,<sup>‡</sup> Attila Mándi,<sup>‡</sup> András Kotschy,<sup>\*†</sup> Tibor Kurtán<sup>\*‡</sup>

<sup>†</sup> Servier Research Institute of Medicinal Chemistry, Záhony u. 7., H-1031 Budapest, Hungary

<sup>‡</sup> Department of Organic Chemistry, University of Debrecen, P. O. Box 400, 4002 Debrecen, Hungary

### Table of Contents

|                                                                                                                                                     |           |
|-----------------------------------------------------------------------------------------------------------------------------------------------------|-----------|
| <b>1. Experimental Section for the Synthesis of NHC Precursors</b>                                                                                  | <b>9</b>  |
| 1.1. General Procedure for the Preparation of <i>N,N</i> -Disubstituted 4,5-Dihydro-1 <i>H</i> -imidazol-3-ium Chloride Derivatives ( <b>1-17</b> ) | 9         |
| 1.2. General Procedure for Preparation of Aldehyde ( <b>18a-b</b> )                                                                                 | 23        |
| 1.3. General Procedure for Preparation of Butane-1,2-diamine ( <b>19a-c</b> )                                                                       | 23        |
| 1.4. General Procedure for Preparation of Substituted Diamine Derivatives ( <b>20a-z</b> )                                                          | 24        |
| 1.5. General Procedure for Preparation of Ketone Derivatives ( <b>21a-k</b> )                                                                       | 33        |
| 1.6. Synthesis of of Substituted 1-Phenylethanamine ( <b>22-24a,b</b> )                                                                             | 36        |
| 1.7. References for Known Compounds                                                                                                                 | 37        |
| <b>2. NMR Spectra (<sup>1</sup>H and <sup>13</sup>C)</b>                                                                                            | <b>38</b> |
| Figure S1. <sup>1</sup> H NMR (500 MHz) spectrum of <b>3a</b> in DMSO-d <sub>6</sub>                                                                | 38        |
| Figure S2. <sup>13</sup> C NMR (125 MHz) spectrum of <b>3a</b> in DMSO-d <sub>6</sub>                                                               | 38        |
| Figure S3. <sup>1</sup> H NMR (500 MHz) spectrum of <b>3b</b> in DMSO-d <sub>6</sub>                                                                | 39        |
| Figure S4. <sup>13</sup> C NMR (125 MHz) spectrum of <b>3b</b> in DMSO-d <sub>6</sub>                                                               | 39        |
| Figure S5. <sup>1</sup> H NMR (500 MHz) spectrum of <b>6a</b> in DMSO-d <sub>6</sub>                                                                | 40        |
| Figure S6. <sup>13</sup> C NMR (125 MHz) spectrum of <b>6a</b> in DMSO-d <sub>6</sub>                                                               | 40        |
| Figure S7. <sup>1</sup> H NMR (500 MHz) spectrum of <b>6b</b> in DMSO-d <sub>6</sub>                                                                | 41        |
| Figure S8. <sup>13</sup> C NMR (125 MHz) spectrum of <b>6b</b> in DMSO-d <sub>6</sub>                                                               | 41        |
| Figure S9. <sup>1</sup> H NMR (500 MHz) spectrum of <b>7a</b> in DMSO-d <sub>6</sub>                                                                | 42        |
| Figure S10. <sup>13</sup> C NMR (125 MHz) spectrum of <b>7a</b> in DMSO-d <sub>6</sub>                                                              | 42        |
| Figure S11. <sup>1</sup> H NMR (500 MHz) spectrum of <b>7b</b> in DMSO-d <sub>6</sub>                                                               | 43        |

|                                                                                 |    |
|---------------------------------------------------------------------------------|----|
| Figure S12. $^{13}\text{C}$ NMR (125 MHz) spectrum of <b>7b</b> in DMSO- $d_6$  | 43 |
| Figure S13. $^1\text{H}$ NMR (500 MHz) spectrum of <b>8a</b> in DMSO- $d_6$     | 44 |
| Figure S14. $^{13}\text{C}$ NMR (125 MHz) spectrum of <b>8a</b> in DMSO- $d_6$  | 44 |
| Figure S15. $^1\text{H}$ NMR (500 MHz) spectrum of <b>8b</b> in DMSO- $d_6$     | 45 |
| Figure S16. $^{13}\text{C}$ NMR (125 MHz) spectrum of <b>8b</b> in DMSO- $d_6$  | 45 |
| Figure S17. $^1\text{H}$ NMR (400 MHz) spectrum of <b>9a</b> in DMSO- $d_6$     | 46 |
| Figure S18. $^{13}\text{C}$ NMR (100 MHz) spectrum of <b>9a</b> in DMSO- $d_6$  | 46 |
| Figure S19. $^1\text{H}$ NMR (400 MHz) spectrum of <b>9b</b> in DMSO- $d_6$     | 47 |
| Figure S20. $^{13}\text{C}$ NMR (100 MHz) spectrum of <b>9b</b> in DMSO- $d_6$  | 47 |
| Figure S21. $^1\text{H}$ NMR (500 MHz) spectrum of <b>10a</b> in DMSO- $d_6$    | 48 |
| Figure S22. $^{13}\text{C}$ NMR (125 MHz) spectrum of <b>10a</b> in DMSO- $d_6$ | 48 |
| Figure S23. $^1\text{H}$ NMR (500 MHz) spectrum of <b>10b</b> in DMSO- $d_6$    | 49 |
| Figure S24. $^{13}\text{C}$ NMR (125 MHz) spectrum of <b>10b</b> in DMSO- $d_6$ | 49 |
| Figure S25. $^1\text{H}$ NMR (500 MHz) spectrum of <b>11a</b> in DMSO- $d_6$    | 50 |
| Figure S26. $^{13}\text{C}$ NMR (125 MHz) spectrum of <b>11a</b> in DMSO- $d_6$ | 50 |
| Figure S27. $^1\text{H}$ NMR (500 MHz) spectrum of <b>11b</b> in DMSO- $d_6$    | 51 |
| Figure S28. $^{13}\text{C}$ NMR (125 MHz) spectrum of <b>11b</b> in DMSO- $d_6$ | 51 |
| Figure S29. $^1\text{H}$ NMR (500 MHz) spectrum of <b>12a</b> in DMSO- $d_6$    | 52 |
| Figure S30. $^{13}\text{C}$ NMR (125 MHz) spectrum of <b>12a</b> in DMSO- $d_6$ | 52 |
| Figure S31. $^1\text{H}$ NMR (500 MHz) spectrum of <b>12b</b> in DMSO- $d_6$    | 53 |
| Figure S32. $^{13}\text{C}$ NMR (125 MHz) spectrum of <b>12b</b> in DMSO- $d_6$ | 53 |
| Figure S33. $^1\text{H}$ NMR (500 MHz) spectrum of <b>13a</b> in DMSO- $d_6$    | 54 |
| Figure S34. $^{13}\text{C}$ NMR (125 MHz) spectrum of <b>13a</b> in DMSO- $d_6$ | 54 |
| Figure S35. $^1\text{H}$ NMR (500 MHz) spectrum of <b>13b</b> in DMSO- $d_6$    | 55 |
| Figure S36. $^{13}\text{C}$ NMR (125 MHz) spectrum of <b>13b</b> in DMSO- $d_6$ | 55 |
| Figure S37. $^1\text{H}$ NMR (500 MHz) spectrum of <b>14a</b> in DMSO- $d_6$    | 56 |
| Figure S38. $^{13}\text{C}$ NMR (125 MHz) spectrum of <b>14a</b> in DMSO- $d_6$ | 56 |
| Figure S39. $^1\text{H}$ NMR (500 MHz) spectrum of <b>14b</b> in DMSO- $d_6$    | 57 |
| Figure S40. $^{13}\text{C}$ NMR (125 MHz) spectrum of <b>14b</b> in DMSO- $d_6$ | 57 |
| Figure S41. $^1\text{H}$ NMR (400 MHz) spectrum of <b>15a</b> in DMSO- $d_6$    | 58 |
| Figure S42. $^{13}\text{C}$ NMR (100 MHz) spectrum of <b>15a</b> in DMSO- $d_6$ | 58 |
| Figure S43. $^1\text{H}$ NMR (400 MHz) spectrum of <b>15b</b> in DMSO- $d_6$    | 59 |
| Figure S44. $^{13}\text{C}$ NMR (100 MHz) spectrum of <b>15b</b> in DMSO- $d_6$ | 59 |
| Figure S45. $^1\text{H}$ NMR (500 MHz) spectrum of <b>16a</b> in DMSO- $d_6$    | 60 |
| Figure S46. $^{13}\text{C}$ NMR (125 MHz) spectrum of <b>16a</b> in DMSO- $d_6$ | 60 |

|                                                                                         |    |
|-----------------------------------------------------------------------------------------|----|
| Figure S47. <sup>1</sup> H NMR (500 MHz) spectrum of <b>16b</b> in DMSO-d <sub>6</sub>  | 61 |
| Figure S48. <sup>13</sup> C NMR (125 MHz) spectrum of <b>16b</b> in DMSO-d <sub>6</sub> | 61 |
| Figure S49. <sup>1</sup> H NMR (500 MHz) spectrum of <b>17a</b> in DMSO-d <sub>6</sub>  | 62 |
| Figure S50. <sup>13</sup> C NMR (125 MHz) spectrum of <b>17a</b> in DMSO-d <sub>6</sub> | 62 |
| Figure S51. <sup>1</sup> H NMR (500 MHz) spectrum of <b>17b</b> in DMSO-d <sub>6</sub>  | 63 |
| Figure S52. <sup>13</sup> C NMR (125 MHz) spectrum of <b>17b</b> in DMSO-d <sub>6</sub> | 63 |
| Figure S53. <sup>1</sup> H NMR (500 MHz) spectrum of <b>19a</b> in DMSO-d <sub>6</sub>  | 64 |
| Figure S54. <sup>13</sup> C NMR (125 MHz) spectrum of <b>19a</b> in DMSO-d <sub>6</sub> | 64 |
| Figure S55. <sup>1</sup> H NMR (500 MHz) spectrum of <b>20a</b> in DMSO-d <sub>6</sub>  | 65 |
| Figure S56. <sup>13</sup> C NMR (125 MHz) spectrum of <b>20a</b> in DMSO-d <sub>6</sub> | 65 |
| Figure S57. <sup>1</sup> H NMR (400 MHz) spectrum of <b>20b</b> in DMSO-d <sub>6</sub>  | 66 |
| Figure S58. <sup>13</sup> C NMR (100 MHz) spectrum of <b>20b</b> in DMSO-d <sub>6</sub> | 66 |
| Figure S59. <sup>1</sup> H NMR (500 MHz) spectrum of <b>20c</b> in DMSO-d <sub>6</sub>  | 67 |
| Figure S60. <sup>13</sup> C NMR (125 MHz) spectrum of <b>20c</b> in DMSO-d <sub>6</sub> | 67 |
| Figure S61. <sup>1</sup> H NMR (500 MHz) spectrum of <b>20d</b> in DMSO-d <sub>6</sub>  | 68 |
| Figure S62. <sup>13</sup> C NMR (125 MHz) spectrum of <b>20d</b> in DMSO-d <sub>6</sub> | 68 |
| Figure S63. <sup>1</sup> H NMR (500 MHz) spectrum of <b>20e</b> in DMSO-d <sub>6</sub>  | 69 |
| Figure S64. <sup>13</sup> C NMR (125 MHz) spectrum of <b>20e</b> in DMSO-d <sub>6</sub> | 69 |
| Figure S65. <sup>1</sup> H NMR (500 MHz) spectrum of <b>20f</b> in DMSO-d <sub>6</sub>  | 70 |
| Figure S66. <sup>13</sup> C NMR (125 MHz) spectrum of <b>20f</b> in DMSO-d <sub>6</sub> | 70 |
| Figure S67. <sup>1</sup> H NMR (400 MHz) spectrum of <b>20g</b> in DMSO-d <sub>6</sub>  | 71 |
| Figure S68. <sup>13</sup> C NMR (100 MHz) spectrum of <b>20g</b> in DMSO-d <sub>6</sub> | 71 |
| Figure S69. <sup>1</sup> H NMR (400 MHz) spectrum of <b>20h</b> in DMSO-d <sub>6</sub>  | 72 |
| Figure S70. <sup>13</sup> C NMR (100 MHz) spectrum of <b>20h</b> in DMSO-d <sub>6</sub> | 72 |
| Figure S71. <sup>1</sup> H NMR (500 MHz) spectrum of <b>20i</b> in DMSO-d <sub>6</sub>  | 73 |
| Figure S72. <sup>13</sup> C NMR (125 MHz) spectrum of <b>20i</b> in DMSO-d <sub>6</sub> | 73 |
| Figure S73. <sup>1</sup> H NMR (500 MHz) spectrum of <b>20j</b> in DMSO-d <sub>6</sub>  | 74 |
| Figure S74. <sup>13</sup> C NMR (125 MHz) spectrum of <b>20j</b> in DMSO-d <sub>6</sub> | 74 |
| Figure S75. <sup>1</sup> H NMR (500 MHz) spectrum of <b>20l</b> in DMSO-d <sub>6</sub>  | 75 |
| Figure S76. <sup>13</sup> C NMR (125 MHz) spectrum of <b>20l</b> in DMSO-d <sub>6</sub> | 75 |
| Figure S77. <sup>1</sup> H NMR (500 MHz) spectrum of <b>20m</b> in DMSO-d <sub>6</sub>  | 76 |
| Figure S78. <sup>13</sup> C NMR (125 MHz) spectrum of <b>20m</b> in DMSO-d <sub>6</sub> | 76 |
| Figure S79. <sup>1</sup> H NMR (500 MHz) spectrum of <b>20n</b> in DMSO-d <sub>6</sub>  | 77 |
| Figure S80. <sup>13</sup> C NMR (125 MHz) spectrum of <b>20n</b> in DMSO-d <sub>6</sub> | 77 |
| Figure S81. <sup>1</sup> H NMR (500 MHz) spectrum of <b>20o</b> in DMSO-d <sub>6</sub>  | 78 |

|                                                                                          |    |
|------------------------------------------------------------------------------------------|----|
| Figure S82. $^{13}\text{C}$ NMR (125 MHz) spectrum of <b>20o</b> in DMSO-d <sub>6</sub>  | 78 |
| Figure S83. $^1\text{H}$ NMR (500 MHz) spectrum of <b>20p</b> in DMSO-d <sub>6</sub>     | 79 |
| Figure S84. $^{13}\text{C}$ NMR (125 MHz) spectrum of <b>20p</b> in DMSO-d <sub>6</sub>  | 79 |
| Figure S85. $^1\text{H}$ NMR (500 MHz) spectrum of <b>20q</b> in DMSO-d <sub>6</sub>     | 80 |
| Figure S86. $^{13}\text{C}$ NMR (125 MHz) spectrum of <b>20q</b> in DMSO-d <sub>6</sub>  | 80 |
| Figure S87. $^1\text{H}$ NMR (400 MHz) spectrum of <b>20r</b> in DMSO-d <sub>6</sub>     | 81 |
| Figure S88. $^{13}\text{C}$ NMR (100 MHz) spectrum of <b>20r</b> in DMSO-d <sub>6</sub>  | 81 |
| Figure S89. $^1\text{H}$ NMR (500 MHz) spectrum of <b>20s</b> in DMSO-d <sub>6</sub>     | 82 |
| Figure S90. $^{13}\text{C}$ NMR (125 MHz) spectrum of <b>20s</b> in DMSO-d <sub>6</sub>  | 82 |
| Figure S91. $^1\text{H}$ NMR (500 MHz) spectrum of <b>20t</b> in DMSO-d <sub>6</sub>     | 83 |
| Figure S92. $^{13}\text{C}$ NMR (125 MHz) spectrum of <b>20t</b> in DMSO-d <sub>6</sub>  | 83 |
| Figure S93. $^1\text{H}$ NMR (500 MHz) spectrum of <b>20u</b> in DMSO-d <sub>6</sub>     | 84 |
| Figure S94. $^{13}\text{C}$ NMR (125 MHz) spectrum of <b>20u</b> in DMSO-d <sub>6</sub>  | 84 |
| Figure S95. $^1\text{H}$ NMR (500 MHz) spectrum of <b>20v</b> in DMSO-d <sub>6</sub>     | 85 |
| Figure S96. $^{13}\text{C}$ NMR (125 MHz) spectrum of <b>20v</b> in DMSO-d <sub>6</sub>  | 85 |
| Figure S97. $^1\text{H}$ NMR (500 MHz) spectrum of <b>20w</b> in DMSO-d <sub>6</sub>     | 86 |
| Figure S98. $^{13}\text{C}$ NMR (125 MHz) spectrum of <b>20w</b> in DMSO-d <sub>6</sub>  | 86 |
| Figure S99. $^1\text{H}$ NMR (500 MHz) spectrum of <b>20x</b> in DMSO-d <sub>6</sub>     | 87 |
| Figure S100. $^{13}\text{C}$ NMR (125 MHz) spectrum of <b>20x</b> in DMSO-d <sub>6</sub> | 87 |
| Figure S101. $^1\text{H}$ NMR (500 MHz) spectrum of <b>20y</b> in DMSO-d <sub>6</sub>    | 88 |
| Figure S102. $^{13}\text{C}$ NMR (125 MHz) spectrum of <b>20y</b> in DMSO-d <sub>6</sub> | 88 |
| Figure S103. $^1\text{H}$ NMR (400 MHz) spectrum of <b>20z</b> in DMSO-d <sub>6</sub>    | 89 |
| Figure S104. $^{13}\text{C}$ NMR (100 MHz) spectrum of <b>20z</b> in DMSO-d <sub>6</sub> | 89 |
| Figure S105. $^1\text{H}$ NMR (500 MHz) spectrum of <b>21a</b> in DMSO-d <sub>6</sub>    | 90 |
| Figure S106. $^{13}\text{C}$ NMR (125 MHz) spectrum of <b>21a</b> in DMSO-d <sub>6</sub> | 90 |
| Figure S107. $^1\text{H}$ NMR (500 MHz) spectrum of <b>21b</b> in DMSO-d <sub>6</sub>    | 91 |
| Figure S108. $^{13}\text{C}$ NMR (125 MHz) spectrum of <b>21b</b> in DMSO-d <sub>6</sub> | 91 |
| Figure S109. $^1\text{H}$ NMR (500 MHz) spectrum of <b>21c</b> in DMSO-d <sub>6</sub>    | 92 |
| Figure S110. $^{13}\text{C}$ NMR (125 MHz) spectrum of <b>21c</b> in DMSO-d <sub>6</sub> | 92 |
| Figure S111. $^1\text{H}$ NMR (400 MHz) spectrum of <b>21d</b> in DMSO-d <sub>6</sub>    | 93 |
| Figure S112. $^{13}\text{C}$ NMR (100 MHz) spectrum of <b>21d</b> in DMSO-d <sub>6</sub> | 93 |
| Figure S113. $^1\text{H}$ NMR (500 MHz) spectrum of <b>21e</b> in DMSO-d <sub>6</sub>    | 94 |
| Figure S114. $^{13}\text{C}$ NMR (125 MHz) spectrum of <b>21e</b> in DMSO-d <sub>6</sub> | 94 |
| Figure S115. $^1\text{H}$ NMR (500 MHz) spectrum of <b>21f</b> in DMSO-d <sub>6</sub>    | 95 |
| Figure S116. $^{13}\text{C}$ NMR (125 MHz) spectrum of <b>21f</b> in DMSO-d <sub>6</sub> | 95 |



|                                                                                                                                           |            |
|-------------------------------------------------------------------------------------------------------------------------------------------|------------|
| Figure S117. $^1\text{H}$ NMR (500 MHz) spectrum of <b>21g</b> in DMSO- $d_6$                                                             | 96         |
| Figure S118. $^{13}\text{C}$ NMR (125 MHz) spectrum of <b>21g</b> in DMSO- $d_6$                                                          | 96         |
| Figure S119. $^1\text{H}$ NMR (500 MHz) spectrum of <b>21h</b> in DMSO- $d_6$                                                             | 97         |
| Figure S120. $^{13}\text{C}$ NMR (125 MHz) spectrum of <b>21h</b> in DMSO- $d_6$                                                          | 97         |
| Figure S121. $^1\text{H}$ NMR (500 MHz) spectrum of <b>21i</b> in DMSO- $d_6$                                                             | 98         |
| Figure S122. $^{13}\text{C}$ NMR (125 MHz) spectrum of <b>21i</b> in DMSO- $d_6$                                                          | 98         |
| Figure S123. $^1\text{H}$ NMR (400 MHz) spectrum of <b>21j</b> in DMSO- $d_6$                                                             | 99         |
| Figure S124. $^{13}\text{C}$ NMR (100 MHz) spectrum of <b>21j</b> in DMSO- $d_6$                                                          | 99         |
| Figure S125. $^1\text{H}$ NMR (500 MHz) spectrum of <b>21k</b> in DMSO- $d_6$                                                             | 100        |
| Figure S126. $^{13}\text{C}$ NMR (125 MHz) spectrum of <b>21k</b> in DMSO- $d_6$                                                          | 100        |
| Figure S127. $^1\text{H}$ NMR (500 MHz) spectrum of <b>22</b> in DMSO- $d_6$                                                              | 101        |
| Figure S128. $^{13}\text{C}$ NMR (125 MHz) spectrum of <b>22</b> in DMSO- $d_6$                                                           | 101        |
| Figure S129. $^1\text{H}$ NMR (500 MHz) spectrum of <b>23</b> in DMSO- $d_6$                                                              | 102        |
| Figure S130. $^{13}\text{C}$ NMR (125 MHz) spectrum of <b>23</b> in DMSO- $d_6$                                                           | 102        |
| Figure S131. $^1\text{H}$ NMR (500 MHz) spectrum of <b>24a</b> in DMSO- $d_6$                                                             | 103        |
| Figure S132. $^{13}\text{C}$ NMR (125 MHz) spectrum of <b>24a</b> in DMSO- $d_6$                                                          | 103        |
| Figure S133. $^1\text{H}$ NMR (500 MHz) spectrum of <b>24b</b> in DMSO- $d_6$                                                             | 104        |
| Figure S134. $^{13}\text{C}$ NMR (125 MHz) spectrum of <b>24b</b> in DMSO- $d_6$                                                          | 104        |
| <b>3. HPLC chromatograms performed with optically active stationary phase</b>                                                             | <b>105</b> |
| Figure S135. Chiral separation of <b>20i,j</b>                                                                                            | 105        |
| Figure S136. Chiral separation of <b>20m,n</b>                                                                                            | 105        |
| Figure S137. Chiral separation of <b>20o,p</b>                                                                                            | 106        |
| Figure S138. Chiral separation of <b>20w,x</b>                                                                                            | 106        |
| Figure S139. Chiral separation of <b>24a,b</b>                                                                                            | 107        |
| <b>4. VCD analysis</b>                                                                                                                    | <b>108</b> |
| Figure S140. Experimental and computed VCD spectra of (5 <i>S</i> ,1' <i>S</i> )- <b>1a</b>                                               | 108        |
| Figure S141. Experimental and computed VCD spectra of (5 <i>S</i> ,1' <i>R</i> )- <b>1b</b>                                               | 108        |
| Figure S142. Overlapped VCD spectra of (5 <i>S</i> ,1' <i>S</i> )- <b>1a</b> and (5 <i>S</i> ,1' <i>R</i> )- <b>1b</b>                    | 109        |
| Figure S143. Overlapped VCD spectra of (5 <i>S</i> ,1' <i>S</i> )- <b>1a</b> and (5 <i>S</i> ,1' <i>R</i> )- <b>1b</b>                    | 110        |
| Figure S144. Experimental and computed VCD spectra of (5 <i>S</i> ,1' <i>S</i> )- <b>2a</b>                                               | 111        |
| Figure S145. Experimental and computed VCD spectra of (5 <i>S</i> ,1' <i>R</i> )- <b>2b</b>                                               | 111        |
| Figure S146. Experimental and computed VCD and IR spectra (5 <i>S</i> ,1' <i>S</i> )- <b>2a</b> and (5 <i>S</i> ,1' <i>R</i> )- <b>2b</b> | 112        |
| Figure S147. Experimental and computed VCD spectra of (5 <i>S</i> ,1' <i>S</i> )- <b>3a</b>                                               | 113        |
| Figure S148. Experimental and computed VCD spectra of (5 <i>S</i> ,1' <i>R</i> )- <b>3b</b>                                               | 113        |
| Figure S149. Experimental and computed VCD spectra of (5 <i>S</i> ,1' <i>S</i> )- <b>4a</b>                                               | 114        |

|                                                                                                                                                                                                    |            |
|----------------------------------------------------------------------------------------------------------------------------------------------------------------------------------------------------|------------|
| Figure S150. Experimental and computed VCD spectra of (5 <i>S</i> ,1' <i>R</i> )- <b>4b</b> .....                                                                                                  | 114        |
| Figure S151. Experimental and computed VCD spectra of (5 <i>S</i> ,1' <i>S</i> )- <b>5a</b> .....                                                                                                  | 115        |
| Figure S152. Experimental and computed VCD spectra of (5 <i>S</i> ,1' <i>R</i> )- <b>5b</b> .....                                                                                                  | 115        |
| Figure S153. Experimental ECD and VCD spectra of (5 <i>R</i> ,1' <i>R</i> )- <b>5a</b> and (5 <i>R</i> ,1' <i>S</i> )- <b>5b</b> .....                                                             | 116        |
| Figure S154. Experimental and computed VCD spectra of (5 <i>S</i> ,1' <i>S</i> )- <b>8a</b> .....                                                                                                  | 117        |
| Figure S155. Experimental and computed VCD spectra of (5 <i>S</i> ,1' <i>R</i> )- <b>8b</b> .....                                                                                                  | 117        |
| Figure S156. VCD and IR spectra of (5 <i>S</i> ,1' <i>S</i> )- <b>8a</b> and (5 <i>S</i> ,1' <i>R</i> )- <b>8b</b> .....                                                                           | 118        |
| Figure S157. Experimental and computed VCD spectra of (5 <i>S</i> ,1' <i>S</i> )- <b>9a</b> .....                                                                                                  | 119        |
| Figure S158. Experimental and computed VCD spectra of (5 <i>S</i> ,1' <i>R</i> )- <b>9b</b> .....                                                                                                  | 119        |
| Figure S159. VCD and IR spectra of (5 <i>S</i> ,1' <i>S</i> )- <b>9a</b> and (5 <i>S</i> ,1' <i>R</i> )- <b>9b</b> .....                                                                           | 120        |
| Figure S160. Experimental and computed VCD spectra of (5 <i>S</i> ,1' <i>S</i> )- <b>10a</b> .....                                                                                                 | 120        |
| Figure S161. Experimental and computed VCD spectra of (5 <i>S</i> ,1' <i>R</i> )- <b>10b</b> .....                                                                                                 | 121        |
| Figure S162. VCD and IR spectra of (5 <i>S</i> ,1' <i>S</i> )- <b>10a</b> and (5 <i>S</i> ,1' <i>R</i> )- <b>10b</b> .....                                                                         | 122        |
| Figure S163. Experimental VCD spectra of (5 <i>S</i> ,1' <i>R</i> )- <b>15b</b> recorded in DMSO- <i>d</i> <sub>6</sub> and CDCl <sub>3</sub> .....                                                | 122        |
| Figure S164. Experimental and computed VCD spectra of ( <i>R</i> )- <b>17a</b> .....                                                                                                               | 123        |
| Figure S165. Experimental VCD spectra of ( <i>S</i> )- <b>17b</b> and ( <i>R</i> )- <b>17a</b> .....                                                                                               | 124        |
| Figure S166. Experimental VCD spectra of (5 <i>S</i> ,1' <i>S</i> )- <b>15a</b> , (5 <i>S</i> ,1' <i>R</i> )- <b>15b</b> , ( <i>S</i> )- <b>17b</b> and ( <i>R</i> )- <b>17b</b> .....             | 125        |
| Figure S167. Experimental VCD spectra of <b>5</b> , <b>8</b> , <b>9</b> , <b>10</b> , <b>13</b> and <b>16</b> .....                                                                                | 126        |
| <b>5. ECD analysis</b> .....                                                                                                                                                                       | <b>127</b> |
| Figure S168. Experimental ECD spectra of <b>1</b> , <b>2</b> , <b>3</b> , <b>4</b> compared with reference spectra <b>5</b> .....                                                                  | 127        |
| Figure S169. Experimental ECD spectra of <b>6</b> , <b>7</b> , <b>8</b> , <b>9</b> compared with reference spectra <b>5</b> .....                                                                  | 128        |
| Figure S170. Experimental ECD spectra of <b>10</b> , <b>11</b> , <b>12</b> , <b>13</b> compared with reference spectra <b>5</b> .....                                                              | 129        |
| Figure S171. Experimental ECD spectra of <b>14</b> , <b>15</b> , <b>16</b> , <b>17</b> compared with reference spectra <b>5</b> .....                                                              | 130        |
| Figure S172. Experimental ECD spectra of <b>5</b> compared with <b>8</b> , <b>9</b> and <b>10</b> .....                                                                                            | 131        |
| Figure S173. ECD spectra of (5 <i>R</i> ,1' <i>R</i> )- <b>5a</b> , (5 <i>S</i> ,1' <i>S</i> )- <b>8a</b> , (5 <i>S</i> ,1' <i>S</i> )- <b>9a</b> and (5 <i>S</i> ,1' <i>S</i> )- <b>10a</b> ..... | 132        |
| Figure S174. ECD spectra of (5 <i>R</i> ,1' <i>S</i> )- <b>5b</b> , (5 <i>S</i> ,1' <i>R</i> )- <b>8b</b> , (5 <i>S</i> ,1' <i>R</i> )- <b>9b</b> and (5 <i>S</i> ,1' <i>R</i> )- <b>10b</b> ..... | 133        |
| Figure S175. Experimental and computed ECD spectrum of (5 <i>S</i> ,1' <i>S</i> )- <b>1a</b> .....                                                                                                 | 134        |
| Figure S176. Experimental and computed ECD spectrum of (5 <i>S</i> ,1' <i>R</i> )- <b>1b</b> .....                                                                                                 | 134        |
| Figure S177. Experimental and computed ECD spectrum of (5 <i>S</i> ,1' <i>S</i> )- <b>2a</b> .....                                                                                                 | 135        |
| Figure S178. Experimental and computed ECD spectrum of (5 <i>S</i> ,1' <i>R</i> )- <b>2b</b> .....                                                                                                 | 135        |
| Figure S179. Experimental and computed ECD spectra of (5 <i>S</i> ,1' <i>S</i> )- <b>4a</b> .....                                                                                                  | 136        |
| Figure S180. Experimental and computed ECD spectra of (5 <i>S</i> ,1' <i>R</i> )- <b>4b</b> .....                                                                                                  | 136        |
| Figure S181. Experimental and computed ECD spectra of (5 <i>R</i> ,1' <i>R</i> )- <b>5a</b> .....                                                                                                  | 137        |
| Figure S182. Experimental and computed ECD spectra of (5 <i>R</i> ,1' <i>S</i> )- <b>5b</b> .....                                                                                                  | 137        |
| Figure S183. Experimental and computed ECD spectra of (5 <i>S</i> ,1' <i>S</i> )- <b>8a</b> .....                                                                                                  | 138        |
| Figure S184. Experimental and computed ECD spectra of (5 <i>S</i> ,1' <i>R</i> )- <b>8b</b> .....                                                                                                  | 138        |

|                                                                                                                     |            |
|---------------------------------------------------------------------------------------------------------------------|------------|
| Figure S185. Experimental and computed ECD spectra of (5 <i>S</i> ,1' <i>S</i> )- <b>9a</b> .....                   | 139        |
| Figure S186. Experimental and computed ECD spectra of (5 <i>S</i> ,1' <i>R</i> )- <b>9b</b> .....                   | 139        |
| Figure S187. Experimental and computed ECD spectra of (5 <i>S</i> ,1' <i>S</i> )- <b>10a</b> .....                  | 140        |
| Figure S188. Experimental and computed ECD spectra of (5 <i>S</i> ,1' <i>R</i> )- <b>10b</b> .....                  | 140        |
| Figure S189. Experimental and computed ECD spectra of (5 <i>S</i> ,1' <i>S</i> )- <b>13a</b> .....                  | 141        |
| <b>6. OR analysis</b> .....                                                                                         | <b>142</b> |
| Table S1. Measured specific rotation of compounds at the sodium D line in MeOH.....                                 | 142        |
| Table S2. Measured specific rotation compared with the four computed values.....                                    | 143        |
| Table S3. OR calculation details of (5 <i>S</i> ,1' <i>S</i> )- <b>2a</b> .....                                     | 143        |
| Table S4. OR calculation details of (5 <i>S</i> ,1' <i>R</i> )- <b>2b</b> .....                                     | 143        |
| Table S5. OR calculation details of (5 <i>R</i> ,1' <i>R</i> )- <b>5a</b> .....                                     | 144        |
| Table S6. OR calculation details of (5 <i>R</i> ,1' <i>S</i> )- <b>5b</b> .....                                     | 144        |
| Table S7. OR calculation details of (5 <i>S</i> ,1' <i>S</i> )- <b>8a</b> .....                                     | 144        |
| Table S8. OR calculation details of (5 <i>S</i> ,1' <i>R</i> )- <b>8b</b> .....                                     | 145        |
| <b>7. Low-energy conformers</b> .....                                                                               | <b>146</b> |
| Figure S190. Structure and population of B3LYP low-energy conformers of (5 <i>S</i> ,1' <i>S</i> )- <b>1a</b> ..... | 146        |
| Figure S191. Structure and population of ωB97X low-energy conformers of (5 <i>S</i> ,1' <i>S</i> )- <b>1a</b> ..... | 146        |
| Figure S192. Structure and population of B3LYP low-energy conformers of (5 <i>S</i> ,1' <i>R</i> )- <b>1b</b> ..... | 147        |
| Figure S193. Structure and population of ωB97X low-energy conformers of (5 <i>S</i> ,1' <i>R</i> )- <b>1b</b> ..... | 147        |
| Figure S194. Structure and population of B3LYP low-energy conformers of (5 <i>S</i> ,1' <i>S</i> )- <b>2a</b> ..... | 148        |
| Figure S195. Structure and population of ωB97X low-energy conformers of (5 <i>S</i> ,1' <i>S</i> )- <b>2a</b> ..... | 148        |
| Figure S196. Structure and population of B3LYP low-energy conformers of (5 <i>S</i> ,1' <i>R</i> )- <b>2b</b> ..... | 149        |
| Figure S197. Structure and population of ωB97X low-energy conformers of (5 <i>S</i> ,1' <i>R</i> )- <b>2b</b> ..... | 149        |
| Figure S198. Structure and population of B3LYP low-energy conformers of (5 <i>S</i> ,1' <i>S</i> )- <b>3a</b> ..... | 150        |
| Figure S199. Structure and population of ωB97X low-energy conformers of (5 <i>S</i> ,1' <i>S</i> )- <b>3a</b> ..... | 151        |
| Figure S200. Structure and population of B3LYP low-energy conformers of (5 <i>S</i> ,1' <i>R</i> )- <b>3b</b> ..... | 152        |
| Figure S201. Structure and population of ωB97X low-energy conformers of (5 <i>S</i> ,1' <i>R</i> )- <b>3b</b> ..... | 153        |
| Figure S202. Structure and population of B3LYP low-energy conformers of (5 <i>S</i> ,1' <i>S</i> )- <b>4a</b> ..... | 153        |
| Figure S203. Structure and population of ωB97X low-energy conformers of (5 <i>S</i> ,1' <i>S</i> )- <b>4a</b> ..... | 154        |
| Figure S204. Structure and population of B3LYP low-energy conformers of (5 <i>S</i> ,1' <i>R</i> )- <b>4b</b> ..... | 154        |
| Figure S205. Structure and population of ωB97X low-energy conformers of (5 <i>S</i> ,1' <i>R</i> )- <b>4b</b> ..... | 155        |
| Figure S206. Structure and population of B3LYP low-energy conformers of (5 <i>R</i> ,1' <i>R</i> )- <b>5a</b> ..... | 155        |
| Figure S207. Structure and population of ωB97X low-energy conformers of (5 <i>R</i> ,1' <i>R</i> )- <b>5a</b> ..... | 156        |
| Figure S208. Structure and population of B3LYP low-energy conformers of (5 <i>R</i> ,1' <i>S</i> )- <b>5b</b> ..... | 156        |
| Figure S209. Structure and population of ωB97X low-energy conformers of (5 <i>R</i> ,1' <i>S</i> )- <b>5b</b> ..... | 157        |
| Figure S210. Structure and population of B3LYP low-energy conformers of (5 <i>S</i> ,1' <i>S</i> )- <b>8a</b> ..... | 157        |

|                                                                                                                              |            |
|------------------------------------------------------------------------------------------------------------------------------|------------|
| Figure S211. Structure and population of $\omega$ B97X low-energy conformers of (5 <i>S</i> ,1' <i>S</i> )- <b>8a</b> .....  | 158        |
| Figure S212. Structure and population of $\omega$ B97X low-energy conformers of (5 <i>S</i> ,1' <i>S</i> )- <b>8a</b> .....  | 158        |
| Figure S213. Structure and population of B3LYP low-energy conformers of (5 <i>S</i> ,1' <i>R</i> )- <b>8b</b> .....          | 159        |
| Figure S214. Structure and population of $\omega$ B97X low-energy conformers of (5 <i>S</i> ,1' <i>R</i> )- <b>8b</b> .....  | 159        |
| Figure S215. Structure and population of $\omega$ B97X low-energy conformers of (5 <i>S</i> ,1' <i>R</i> )- <b>8b</b> .....  | 160        |
| Figure S216. Structure and population of B3LYP low-energy conformers of (5 <i>S</i> ,1' <i>S</i> )- <b>9a</b> .....          | 160        |
| Figure S217. Structure and population of $\omega$ B97X low-energy conformers of (5 <i>S</i> ,1' <i>S</i> )- <b>9a</b> .....  | 161        |
| Figure S218. Structure and population of B3LYP low-energy conformers of (5 <i>S</i> ,1' <i>R</i> )- <b>9b</b> .....          | 162        |
| Figure S219. Structure and population of $\omega$ B97X low-energy conformers of (5 <i>S</i> ,1' <i>R</i> )- <b>9b</b> .....  | 163        |
| Figure S220. Structure and population of B3LYP low-energy conformers of (5 <i>S</i> ,1' <i>S</i> )- <b>10a</b> .....         | 163        |
| Figure S221. Structure and population of $\omega$ B97X low-energy conformers of (5 <i>S</i> ,1' <i>S</i> )- <b>10a</b> ..... | 164        |
| Figure S222. Structure and population of B3LYP low-energy conformers of (5 <i>S</i> ,1' <i>R</i> )- <b>10b</b> .....         | 165        |
| Figure S223. Structure and population of $\omega$ B97X low-energy conformers of (5 <i>S</i> ,1' <i>R</i> )- <b>10b</b> ..... | 166        |
| Figure S224. Structure and population of B3LYP low-energy conformers of ( <i>R</i> )- <b>17a</b> .....                       | 166        |
| Figure S225. Structure and population of $\omega$ B97X low-energy conformers of ( <i>R</i> )- <b>17a</b> .....               | 167        |
| <b>8. Cartesian coordinates</b> .....                                                                                        | <b>168</b> |
| Table S9. Cartesian coordinates and energies at the B3LYP/TZVP PCM level.....                                                | 168        |
| Table S10. Cartesian coordinates and energies at the $\omega$ B97X/TZVP PCM/MeCN level.....                                  | 272        |
| Table S11. Cartesian coordinates and energies at the $\omega$ B97X/TZVP PCM/MeOH level.....                                  | 365        |

# 1 Experimental Section for the Synthesis of NHC Precursors

## 1.1 General Procedure for the Preparation of *N,N*-Disubstituted 4,5-Dihydro-1*H*-imidazol-3-ium Chloride Derivatives (1-17)

Example for compound **3a**:

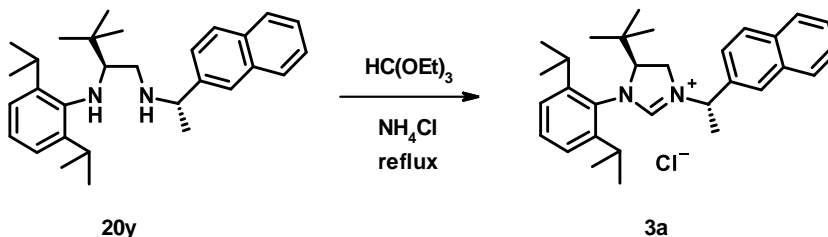

2.10 g (2*S*)-*N*<sup>2</sup>-(2,6-di(propan-2-yl)phenyl)-3,3-dimethyl-*N*<sup>1</sup>-[(1'*S*)-1-(2-naphthyl)ethyl] butane-1,2-diamine [(2*S*,1'*S*)-**20y**] (4.88 mmol) was dissolved in 24.3 mL HC(OEt)<sub>3</sub> (146 mmol) and 287 mg NH<sub>4</sub>Cl (5.63 mmol) was added in one portion. The mixture was heated to reflux temperature and stirred for 2 h, when complete conversion was observed by HPLC-MS. The volatiles were removed under reduced pressure and the residue was purified by column chromatography using DCM with 1.2% methanolic ammonia as eluent. The crude product was recrystallized from DCM-Et<sub>2</sub>O.

### (5*S*,1'*S*)-5-*tert*-butyl-1-(2,6-di(propan-2-yl)phenyl)-3-[1-phenylethyl]-4,5-dihydro-1*H*-imidazol-3-ium chloride [(5*S*,1'*S*)-**1a**]

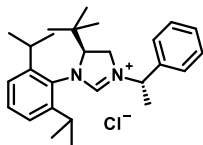

(5*S*,1'*S*)-**1a** was prepared by following published procedures.<sup>1</sup> [ $\alpha$ ]<sub>D</sub><sup>20</sup> = -27 (*c* 0.01, MeOH). ECD (MeCN,  $\lambda$  nm ( $\Delta\epsilon$ ) *c* = 1.94 x 10<sup>-4</sup> M): 254 (-8.12), 224 (-0.24), 196 (2.24), 190 (-17.66). (5*S*,1'*R*)-5-*tert*-butyl-1-(2,6-di(propan-2-yl)phenyl)-3-[1-phenylethyl]-4,5-dihydro-1*H*-imidazol-3-ium chloride [(5*S*,1'*R*)-**1b**]

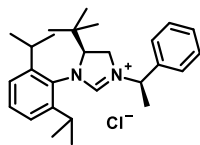

(5*S*,1'*R*)-**1b** was prepared by following published procedures.<sup>1</sup> [ $\alpha$ ]<sub>D</sub><sup>20</sup> = -46 (*c* 0.01, MeOH). ECD (MeCN,  $\lambda$  nm ( $\Delta\epsilon$ ) *c* = 1.92 x 10<sup>-4</sup> M): 253 (-7.51), 225 (-0.97), 205 (-6.44), 197 (3.59), 191 (15.15).

### (5*S*,1'*S*)-5-*tert*-butyl-1-(2,6-di(propan-2-yl)phenyl)-3-[1-(1-naphthyl)ethyl]-4,5-dihydro-1*H*-imidazol-3-ium chloride [(5*S*,1'*S*)-**2a**]

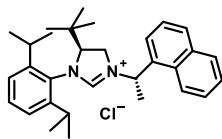

(5*S*,1'*S*)-**2a** was prepared by following published procedures.<sup>1</sup> [ $\alpha$ ]<sub>D</sub><sup>20</sup> = +50 (*c* 0.01, MeOH). ECD (MeCN,  $\lambda$  nm ( $\Delta\epsilon$ ) *c* = 1.62 x 10<sup>-4</sup> M): 284 (-2.50), 254 (6.19), 245 (5.92), 236 (7.40), 221 (-28.97), 190 (21.03).

**(5*S*,1'*R*)-4-*tert*-butyl-1-(2,6-di(propan-2-yl)phenyl)-3-[1-(1-naphthyl)ethyl]-4,5-dihydro-1*H*-imidazol-3-ium chloride [(5*S*,1'*R*)-2*b*]**

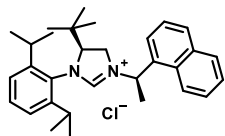

(5*S*,1'*R*)-**2b** was prepared by following published procedures.<sup>1</sup>  $[\alpha]_{\text{D}}^{20} = -188$  (*c* 0.01, MeOH). ECD (MeCN,  $\lambda$  nm ( $\Delta\epsilon$ ) *c* =  $1.86 \times 10^{-4}$  M): 294 (1.03), 248 (−29.92), 232 (−27.73), 227 (−30.53), 213 (9.02), 210 (8.11), 199 (22.43), 198 (21.12), 190 (53.28).

**(5*S*,1'*S*)-5-*tert*-butyl-1-(2,6-di(propan-2-yl)phenyl)-3-[1-(2-naphthyl)ethyl]-4,5-dihydro-1*H*-imidazol-3-ium chloride [(5*S*,1'*S*)-3*a*]**

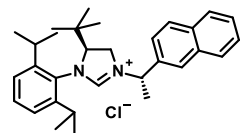

(5*S*,1'*S*)-**3a** was collected as white solid (1.87 g, 3.93 mmol, 80.6%). mp 238–240 °C.  $[\alpha]_{\text{D}}^{20} = -35$  (*c* 0.01, MeOH). ECD (MeCN,  $\lambda$  nm ( $\Delta\epsilon$ ) *c* =  $1.48 \times 10^{-4}$  M): 253 (−8.75), 224 (−29.92), 205 (−9.75), 190 (20.23). <sup>1</sup>H NMR (500 MHz, DMSO-*d*<sub>6</sub>)  $\delta$  9.13 (s, CH, 1 H), 8.06 (d, *J* = 8.6 Hz, Ar-H, 1 H), 7.99 (dd, *J* = 6.7, 1.8 Hz, Ar-H, 1 H), 7.97 (br, Ar-H, 1 H), 7.94 (dd, *J* = 6.7, 1.8 Hz, Ar-H, 1 H), 7.61 (td, *J* = 6.7, 1.8 Hz, Ar-H, 1 H), 7.59 (td, *J* = 6.7, 1.8 Hz, Ar-H, 1 H), 7.55 (dd, *J* = 8.6, 1.9 Hz, Ar-H, 1 H), 7.49 (t, *J* = 7.7 Hz, Ar-H, 1 H), 7.40 (dd, *J* = 7.7, 1.5 Hz, Ar-H, 1 H), 7.38 (dd, *J* = 7.7, 1.5 Hz, Ar-H, 1 H), 5.20 (q, *J* = 7.0 Hz, CH, 1 H), 4.44 (dd, *J* = 12.4, 9.3 Hz, CH, 1 H), 4.17/4.01 (t+dd, *J* = 12.4 Hz, *J* = 12.4, 9.3 Hz, CH<sub>2</sub>, 2 H), 3.25 (sp, *J* = 6.7 Hz, CH, 1 H), 2.92 (sp, *J* = 6.7 Hz, CH, 1 H), 1.83 (d, *J* = 7.0 Hz, CH<sub>3</sub>, 3 H), 1.30 (d, *J* = 6.7 Hz, CH<sub>3</sub>, 3 H), 1.30 (d, *J* = 6.7 Hz, CH<sub>3</sub>, 3 H), 1.24 (d, *J* = 6.7 Hz, CH<sub>3</sub>, 3 H), 1.22 (d, *J* = 6.7 Hz, CH<sub>3</sub>, 3 H), 0.74 (s, CH<sub>3</sub>, 9 H). <sup>13</sup>C NMR (125 MHz, DMSO-*d*<sub>6</sub>)  $\delta$  158.6, 145.5, 145.2, 135.8, 132.9, 132.8, 132.2, 130.4, 129.0, 127.9, 127.7, 126.9, 126.8, 126.0, 125.5, 125.3, 123.8, 73.9, 64.9, 57.8, 49.7, 28.3, 28.0, 25.8, 25.6, 25.2, 23.2, 22.6, 19.2. HRMS calcd for C<sub>31</sub>H<sub>41</sub>N<sub>2</sub> [M − Cl]<sup>+</sup> 441.3270, found 441.3261.

**(5*S*,1'*R*)-5-*tert*-butyl-1-(2,6-di(propan-2-yl)phenyl)-3-[1-(2-naphthyl)ethyl]-4,5-dihydro-1*H*-imidazol-3-ium chloride [(5*S*,1'*R*)-3*b*]**

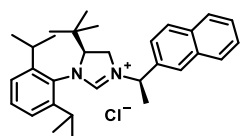

By following the synthetic procedure described for (5*S*,1'*S*)-**3a**, the reaction was carried out with 2.71 g (2*S*,1'*R*)-**20z** (6.31 mmol). The product (5*S*,1'*R*)-**3b** was collected as white solid (2.49 g, 5.22 mmol, 82.8%). mp 264–266 °C.  $[\alpha]_{\text{D}}^{20} = -29$  (*c* 0.01, MeOH). ECD (MeCN,  $\lambda$  nm ( $\Delta\epsilon$ ) *c* =  $1.81 \times 10^{-4}$  M): 250 (−9.63), 224 (6.33), 205 (−7.89), 190 (19.83). <sup>1</sup>H NMR (500 MHz, DMSO-*d*<sub>6</sub>)  $\delta$  8.21 (s, CH, 1 H), 8.19–7.52 (m, Ar-H, 7 H), 7.47 (t, *J* = 7.7 Hz, Ar-H, 1 H), 7.38 (dd, *J* = 7.7, 1.5 Hz, Ar-H, 1 H), 7.35 (dd, *J* = 7.7, 1.5 Hz, Ar-H, 1 H), 5.47 (q, *J* = 7.0 Hz, CH, 1 H), 4.37 (dd, *J* = 12.4, 8.9 Hz, CH, 1 H), 4.08/4.00 (t+dd, *J* = 12.4 Hz, *J* = 12.4, 8.9 Hz, CH<sub>2</sub>, 2 H), 3.28 (sp, *J* = 6.7 Hz, CH, 1 H), 2.84 (sp, *J* = 6.7 Hz, CH, 1 H), 1.87 (d, *J* = 7.0 Hz, CH<sub>3</sub>, 3 H), 1.31 (d, *J* = 6.7 Hz, CH<sub>3</sub>, 3 H), 1.27 (d, *J* = 6.7 Hz, CH<sub>3</sub>, 3 H), 1.22 (d, *J* = 6.7 Hz, CH<sub>3</sub>, 3 H), 1.13 (d, *J* = 6.7 Hz, CH<sub>3</sub>, 3 H), 0.77 (s, CH<sub>3</sub>, 9 H). <sup>13</sup>C NMR (125 MHz, DMSO-*d*<sub>6</sub>)  $\delta$  159.5, 145.5, 145.3, 135.0, 132.8, 132.8, 132.2, 130.3, 128.8, 128.1, 127.7, 126.8, 126.1, 125.4, 125.3, 124.6, 74.2, 56.9, 47.7, 28.3, 28.0, 26.0, 25.5, 25.3, 23.2, 22.6, 17.5. HRMS calcd for C<sub>31</sub>H<sub>41</sub>N<sub>2</sub> [M − Cl]<sup>+</sup> 441.3270, found 441.3255.

**(5*S*,1'*S*)-5-*tert*-butyl-1-(2,6-di(propan-2-yl)phenyl)-3-[1,2,2-trimethylpropyl]-4,5-dihydro-1*H*-imidazol-3-ium chloride [(5*S*,1'*S*)-4*a*]**

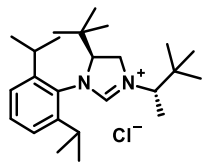

(5*S*,1'*S*)-**4a** was prepared by following published procedures.<sup>1</sup>  $[\alpha]_{\text{D}}^{20} = -10$  (*c* 0.01, MeOH). ECD (MeCN,  $\lambda$  nm ( $\Delta\epsilon$ ) *c* =  $2.17 \times 10^{-4}$  M): 249 (−5.83), 227 (−0.69), 208 (−3.75), 190 (22.05).

**(5*S*,1'*R*)-5-*tert*-butyl-1-(2,6-di(propan-2-yl)phenyl)-3-[1,2,2-trimethylpropyl]-4,5-dihydro-1*H*-imidazol-3-ium chloride [(5*S*,1'*R*)-4b]**

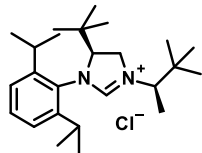

(5*S*,1'*R*)-**4b** was prepared by following published procedures.<sup>1</sup>  $[\alpha]_{\text{D}}^{20} = -55$  (*c* 0.01, MeOH). ECD (MeCN,  $\lambda$  nm ( $\Delta\epsilon$ ) *c* =  $2.17 \times 10^{-4}$  M): 250 (−8.30), 223 (−1.78), 208 (−3.89), 190 (16.52).

**(5*R*,1'*R*)-5-*tert*-butyl-1-(2,6-di(propan-2-yl)phenyl)-3-[1,2-diphenylethyl]-4,5-dihydro-1*H*-imidazol-3-ium chloride [(5*R*,1'*R*)-5a]**

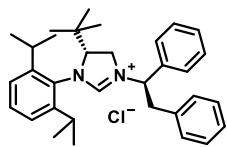

(5*R*,1'*R*)-**5a** was prepared by following published procedures.<sup>1</sup>  $[\alpha]_{\text{D}}^{20} = +61$  (*c* 0.01, MeOH). ECD (MeCN,  $\lambda$  nm ( $\Delta\epsilon$ ) *c* =  $1.50 \times 10^{-4}$  M): 255 (10.69), 228 (0.46), 208 (6.40), 194 (−8.27), 191 (−1.56).

**(5*R*,1'*S*)-5-*tert*-butyl-1-(2,6-di(propan-2-yl)phenyl)-3-[1,2-diphenylethyl]-4,5-dihydro-1*H*-imidazol-3-ium chloride [(5*R*,1'*S*)-5b]**

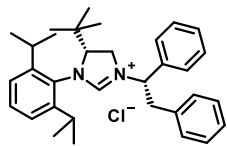

(5*R*,1'*S*)-**5b** was prepared by following published procedures.<sup>1</sup>  $[\alpha]_{\text{D}}^{20} = -61$  (*c* 0.01, MeOH). ECD (MeCN,  $\lambda$  nm ( $\Delta\epsilon$ ) *c* =  $2.14 \times 10^{-4}$  M): 257 (4.63), 229 (−2.67), 217 (0.99), 195 (−18.32), 190 (13.23).

**(5*R*,1'*R*)-5-*tert*-butyl-3-[2-(3-chlorophenyl)-1-phenylethyl]-1-(2,6-di(propan-2-yl)phenyl)-4,5-dihydro-1*H*-imidazol-3-ium chloride [(5*R*,1'*R*)-6a]**

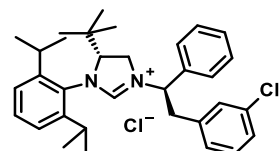

By following the synthetic procedure described for (5*S*,1'*S*)-**3a**, the reaction was performed with 1.13 g (2*R*,1'*R*)-**20a** (2.29 mmol). The product (5*R*,1'*R*)-**6a** was collected as white solid (804 mg, 1.50 mmol, 65.3%). mp 255–257 °C.  $[\alpha]_{\text{D}}^{20} = +58$  (*c* 0.01, MeOH). ECD (MeCN,  $\lambda$  nm ( $\Delta\epsilon$ ) *c* =  $1.66 \times 10^{-4}$  M): 256 (4.63), 227 (−0.03), 207 (7.23), 190 (−11.87). <sup>1</sup>H NMR (500 MHz, DMSO-*d*<sub>6</sub>)  $\delta$  9.21 (s, CH, 1 H), 7.58–7.33 (m, Ar- H, 4 H), 7.58–7.42 (m, Ar-H, 5 H), 7.46 (t, *J* = 7.8 Hz, Ar-H, 1 H), 7.35 (d, *J* = 7.8 Hz, Ar-H, 2 H), 5.52 (dd, *J* = 11.7, 5.1 Hz, CH, 1 H), 4.24 (m, CH, 1 H), 4.23/3.92 (m+m, CH<sub>2</sub>, 2 H), 3.64/3.45 (dd+dd,

$J = 15.4, 11.7$  Hz,  $J = 15.4, 5.1$  Hz, CH<sub>2</sub>, 2 H), 2.77 (sp,  $J = 6.7$  Hz, CH, 1 H), 2.66 (sp,  $J = 6.7$  Hz, CH, 1 H), 1.26 (d,  $J = 6.7$  Hz, CH<sub>3</sub>, 3 H), 1.20 (d,  $J = 6.7$  Hz, CH<sub>3</sub>, 3 H), 1.14 (d,  $J = 6.7$  Hz, CH<sub>3</sub>, 3 H), 1.05 (d,  $J = 6.7$  Hz, CH<sub>3</sub>, 3 H), 0.61 (s, CH<sub>3</sub>, 9 H). <sup>13</sup>C NMR (125 MHz, DMSO-*d*<sub>6</sub>)  $\delta$  158.9, 145.3, 144.9, 138.9, 136.9, 133.6, 131.8, 130.5, 130.5, 129.2, 129.1, 128.3, 127.7, 127.1, 126.9, 125.5, 125.3, 73.8, 61.5, 50.3, 37.4, 35.0, 28.4, 28.0, 25.8, 25.1, 25.0, 23.2, 22.5. HRMS calcd for C<sub>33</sub>H<sub>42</sub>ClN<sub>2</sub> [M-Cl]<sup>+</sup> 501.3037, found 501.3032.

**(5*R*,1'*S*)-5-*tert*-butyl-3-[2-(3-chlorophenyl)-1-phenylethyl]-1-(2,6-di(propan-2-yl)phenyl)-4,5-dihydro-1*H*-imidazol-3-ium chloride [(5*R*,1'*S*)-6b]**

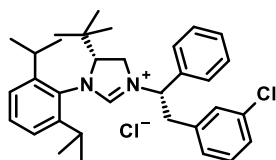

By following the synthetic procedure described for (5*S*,1'*S*)-**3a**, the reaction was performed with 1.62 g (2*R*,1'*S*)-**20b** (3.30 mmol). The product (5*R*,1'*S*)-**6b** was collected as white solid (1.42 g, 2.64 mmol, 80.1%). mp 262-264°C.  $[\alpha]_{\text{D}}^{20} = -50$  (*c* 0.01, MeOH). ECD (MeCN,  $\lambda$  nm ( $\Delta\epsilon$ ) *c* = 1.52 x 10<sup>-4</sup> M): 262 (4.53), 229 (-3.79), 207 (1.60), 200 (-4.31), 191 (13.12). <sup>1</sup>H NMR (500 MHz, DMSO-*d*<sub>6</sub>)  $\delta$  9.02 (s, CH, 1 H), 7.65 (brs, Ar-H, 1 H), 7.61-7.43 (m, Ar-H, 8 H), 7.43 (t,  $J = 7.8$  Hz, Ar-H, 1 H), 7.30 (dm,  $J = 7.8$  Hz, Ar-H, 2 H), 5.70 (dd,  $J = 12.1, 4.0$  Hz, CH, 1 H), 4.44 (dd,  $J = 12.0, 10.3$  Hz, 1 H), 4.14/3.79 (dd+dd,  $J = 12.0, 10.3$  Hz,  $J = 12.0, 10.3$  Hz, CH<sub>2</sub>, 2 H), 3.79/3.41 (dd+dd,  $J = 14.3, 12.1$  Hz,  $J = 14.3, 4.0$  Hz, CH<sub>2</sub>, 2 H), 2.72 (sp,  $J = 6.7$  Hz, CH, 1 H), 2.41 (sp,  $J = 6.7$  Hz, CH, 1 H), 1.24 (d,  $J = 6.7$  Hz, CH<sub>3</sub>, 3 H), 1.17 (d,  $J = 6.7$  Hz, CH<sub>3</sub>, 3 H), 1.05 (d,  $J = 6.7$  Hz, CH<sub>3</sub>, 3 H), 0.93 (d,  $J = 6.7$  Hz, CH<sub>3</sub>, 3 H), 0.66 (s, CH<sub>3</sub>, 9 H). <sup>13</sup>C NMR (125 MHz, DMSO-*d*<sub>6</sub>)  $\delta$  159.4, 145.4, 145.2, 139.5, 135.7, 133.4, 131.3, 130.6, 130.5, 129.4, 129.2, 127.9, 127.7, 127.1, 125.3, 125.2, 74.0, 62.0, 46.2, 34.7, 34.3, 28.3, 27.8, 26.0, 25.6, 25.2, 22.7, 22.3. HRMS calcd for C<sub>33</sub>H<sub>42</sub>ClN<sub>2</sub> [M-Cl]<sup>+</sup> 501.3037, found 501.3038.

**(5*R*,1'*R*)-5-*tert*-butyl-1-(2,6-di(propan-2-yl)phenyl)-3-[2-phenyl-1-[3-(trifluoromethyl)phenyl]ethyl]-4,5-dihydro-1*H*-imidazol-3-ium chloride [(5*R*,1'*R*)-7a]**

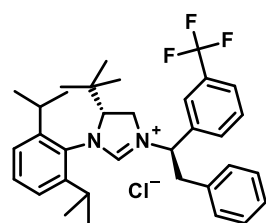

By following the synthetic procedure described for (5*S*,1'*S*)-**3a**, the reaction was performed with 815 mg (2*R*,1'*R*)-**20c** (1.53 mmol). The product (5*R*,1'*R*)-**7a** was collected as white solid (547 mg, 0.958 mmol, 61.7%). mp 225-227 °C.  $[\alpha]_{\text{D}}^{20} = +63$  (*c* 0.01, MeOH). ECD (MeCN,  $\lambda$  nm ( $\Delta\epsilon$ ) *c* = 1.47 x 10<sup>-4</sup> M): 252 (10.92), 220 (0.53), 205 (7.35), 196 (-6.14), 194 (-4.73), 190 (-10.61). <sup>1</sup>H NMR (500 MHz, DMSO-*d*<sub>6</sub>)  $\delta$  9.29 (s, CH, 1 H), 7.94 (s, Ar-H, 1 H), 7.89 (dm,  $J = 7.8$  Hz, Ar-H, 1 H), 7.84 (dm,  $J = 7.8$  Hz, Ar-H, 1 H), 7.76 (t,  $J = 7.8$  Hz, Ar-H, 1 H), 7.47 (t,  $J = 7.7$  Hz, Ar-H, 1 H), 7.45-7.28 (m, Ar-H, 7 H), 5.60 (dd,  $J = 11.6, 5.4$  Hz, CH, 1 H), 4.26/3.91 (m+m, CH<sub>2</sub>, 2 H), 4.23 (m, CH, 1 H), 3.62/3.48 (dd+dd,  $J = 15.3, 11.6$  Hz,  $J = 15.3, 5.4$  Hz, CH<sub>2</sub>, 2 H), 2.74 (sp,  $J = 6.7$  Hz, CH, 1 H), 2.67 (sp,  $J = 6.7$  Hz, CH, 1 H), 1.24 (d,  $J = 6.7$  Hz, CH<sub>3</sub>, 3 H), 1.18 (d,  $J = 6.7$  Hz, CH<sub>3</sub>, 3 H), 1.18 (d,  $J = 6.7$  Hz, CH<sub>3</sub>, 3 H), 1.04 (d,  $J = 6.7$  Hz, CH<sub>3</sub>, 3 H), 0.57 (s, CH<sub>3</sub>, 9 H). <sup>13</sup>C NMR (125 MHz, DMSO-*d*<sub>6</sub>)  $\delta$  158.9, 145.2, 144.8, 138.8, 136.0, 131.7, 131.7, 130.4, 130.3, 128.8, 128.7, 127.1, 125.8, 125.5, 125.4, 123.5, 73.7, 61.5, 50.9, 38.0, 34.9, 28.3, 27.8, 26.1, 25.0, 25.0, 23.2, 22.5. HRMS calcd for C<sub>34</sub>H<sub>42</sub>F<sub>3</sub>N<sub>2</sub> [M-Cl]<sup>+</sup> 535.3300, found 535.3303.



**(5*R*,1'*S*)-5-*tert*-butyl-1-(2,6-di(propan-2-yl)phenyl)-3-[2-phenyl-1-[3-(trifluoromethyl)phenyl]ethyl]-4,5-dihydro-1*H*-imidazol-3-ium chloride [(5*R*,1'*S*)-7b]**

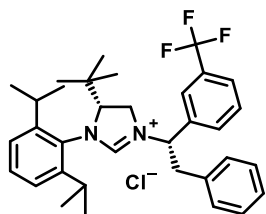

By following the synthetic procedure described for (5*S*,1'*S*)-**3a**, the reaction was performed with 660 mg (2*R*,1'*S*)-**20d** (1.26 mmol). The product (5*R*,1'*S*)-**7b** was collected as a white solid (294 mg, 0.514 mmol, 40.9%). mp 267-269°C.  $[\alpha]_D^{20} = -39$  (*c* 0.01, MeOH). ECD (MeCN,  $\lambda$  nm ( $\Delta\epsilon$ ) *c* =  $1.45 \times 10^{-4}$  M): 255 (4.24), 230 (−2.41), 209 (2.44), 195 (−19.86), 190 (−0.29). <sup>1</sup>H NMR (500 MHz, DMSO-*d*<sub>6</sub>)  $\delta$  9.24 (s, CH, 1 H), 7.99 (dm, *J* = 7.8 Hz, Ar-H, 1 H), 7.98 (s, Ar-H, 1 H), 7.88 (dm, *J* = 7.8 Hz, Ar-H, 1 H), 7.82 (t, *J* = 7.8 Hz, Ar-H, 1 H), 7.56-7.32 (m, Ar-H, 5 H), 7.43 (t, *J* = 7.8 Hz, Ar-H, 1 H), 7.30 (d, *J* = 7.8 Hz, Ar-H, 2 H), 5.98 (dd, *J* = 12.5, 4.2 Hz, CH, 1 H), 4.41 (dd, *J* = 12.6, 10.1 Hz, CH, 1 H), 4.05/3.80 (dd+dm, *J* = 12.6, 10.1 Hz, *J* = 12.6 Hz, CH<sub>2</sub>, 2 H), 3.83/3.47 (dd+dd, *J* = 14.4, 12.5 Hz, *J* = 14.4, 4.2 Hz, CH<sub>2</sub>, 2 H), 2.73 (sp, *J* = 6.7 Hz, CH, 1 H), 2.41 (sp, *J* = 6.7 Hz, CH, 1 H), 1.22 (d, *J* = 6.7 Hz, CH<sub>3</sub>, 3 H), 1.13 (d, *J* = 6.7 Hz, CH<sub>3</sub>, 3 H), 1.04 (d, *J* = 6.7 Hz, CH<sub>3</sub>, 3 H), 0.98 (d, *J* = 6.7 Hz, CH<sub>3</sub>, 3 H), 0.59 (s, CH<sub>3</sub>, 9 H). <sup>13</sup>C NMR (125 MHz, DMSO-*d*<sub>6</sub>)  $\delta$  159.7, 145.3, 145.1, 137.5, 136.5, 131.8, 131.2, 130.4, 130.3, 129.1, 128.8, 127.1, 125.9, 125.3, 125.2, 124.8, 73.9, 60.8, 46.4, 34.6, 34.3, 28.2, 27.6, 26.1, 25.6, 25.1, 22.7, 22.2. HRMS calcd for C<sub>34</sub>H<sub>42</sub>F<sub>3</sub>N<sub>2</sub> [M-Cl]<sup>+</sup> 535.3300, found 535.3294.

**(5*S*,1'*S*)-5-*tert*-butyl-1-(2,6-di(propan-2-yl)phenyl)-3-[1-(2-methoxyphenyl)-2-phenylethyl]-4,5-dihydro-1*H*-imidazol-3-ium chloride [(5*S*,1'*S*)-8a]**

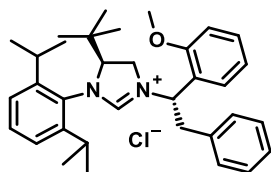

By following the synthetic procedure described for (5*S*,1'*S*)-**3a**, the reaction was performed with 753 mg (2*S*,1'*S*)-**20e** (1.55 mmol). The product (5*S*,1'*S*)-**8a** was collected as white solid (673 mg, 1.26 mmol, 81.6%). mp 208-210°C.  $[\alpha]_D^{20} = -52$  (*c* 0.01, MeOH). ECD (MeCN,  $\lambda$  nm ( $\Delta\epsilon$ ) *c* =  $1.76 \times 10^{-4}$  M): 282 (12.44), 254 (−14.75), 229 (0.67), 206 (−14.93), 195 (8.70), 193 (−0.69), 190 (12.88). <sup>1</sup>H NMR (500 MHz, DMSO-*d*<sub>6</sub>)  $\delta$  9.05 (s, CH, 1 H), 7.57 (d, *J* = 7.8 Hz, Ar-H, 1 H), 7.48 (t, *J* = 7.8 Hz, Ar-H, 1 H), 7.45 (d, *J* = 7.3 Hz, Ar-H, 2 H), 7.44 (t, *J* = 7.7 Hz, Ar-H, 1 H), 7.37 (t, *J* = 7.3 Hz, Ar-H, 2 H), 7.34 (d, *J* = 7.7 Hz, Ar-H, 1 H), 7.31 (d, *J* = 7.7 Hz, Ar-H, 1 H), 7.28 (t, *J* = 7.3 Hz, Ar-H, 1 H), 7.18 (d, *J* = 7.8 Hz, Ar-H, 1 H), 7.12 (t, *J* = 7.8 Hz, Ar-H, 1 H), 5.60 (dd, *J* = 11.5, 4.6 Hz, CH, 1 H), 4.37/3.45 (t+dd, *J* = 12.5 Hz, *J* = 12.5, 7.9 Hz, CH<sub>2</sub>, 2 H), 4.20 (dd, *J* = 12.5, 7.9 Hz, CH, 1 H), 3.87 (s, CH<sub>3</sub>, 3 H), 3.60/3.36 (dd+dd, *J* = 14.6, 11.5 Hz, *J* = 14.6, 4.6 Hz, CH<sub>2</sub>, 2 H), 2.96 (sp, *J* = 6.7 Hz, CH, 1 H), 2.56 (sp, *J* = 6.7 Hz, CH, 1 H), 1.28 (d, *J* = 6.7 Hz, CH<sub>3</sub>, 3 H), 1.25 (d, *J* = 6.7 Hz, CH<sub>3</sub>, 3 H), 1.23 (d, *J* = 6.7 Hz, CH<sub>3</sub>, 3 H), 0.92 (d, *J* = 6.7 Hz, CH<sub>3</sub>, 3 H), 0.52 (s, CH<sub>3</sub>, 9 H). <sup>13</sup>C NMR (125 MHz, DMSO-*d*<sub>6</sub>)  $\delta$  159.8, 157.1, 145.3, 145.0, 136.7, 131.6, 130.7, 130.3, 129.0, 128.6, 127.5, 127.0, 125.5, 125.3, 123.2, 120.7, 111.6, 73.4, 56.9, 55.8, 47.2, 34.8, 34.8, 28.3, 27.8, 26.0, 25.4, 24.9, 23.5, 22.7. HRMS calcd for C<sub>34</sub>H<sub>45</sub>N<sub>2</sub>O [M-Cl]<sup>+</sup> 497.3532, found 497.3533.

**(5*S*,1'*R*)-5-*tert*-butyl-1-(2,6-di(propan-2-yl)phenyl)-3-[1-(2-methoxyphenyl)-2-phenylethyl]-4,5-dihydro-1*H*-imidazol-3-ium chloride [(5*S*,1'*R*)-8b]**

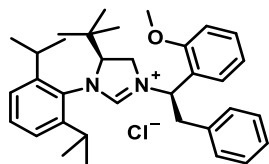

By following the synthetic procedure described for (5*S*,1'*S*)-**3a**, the reaction was performed with 485 mg (2*S*,1'*R*)-**20f** (1.00 mmol). The product (5*S*,1'*R*)-**8b** was collected as white solid (441 mg, 0.827 mmol, 82.7%). mp 232-234°C.  $[\alpha]_{\text{D}}^{20} = -32$  (*c* 0.01, MeOH). ECD (MeCN,  $\lambda$  nm ( $\Delta\epsilon$ ) *c* =  $1.54 \times 10^{-4}$  M): 276 (−15.39), 253 (0.54), 229 (−1.89), 225 (−0.86), 206 (9.93), 195 (33.67). <sup>1</sup>H NMR (500 MHz, DMSO-*d*<sub>6</sub>)  $\delta$  8.70 (s, CH, 1 H), 7.62 (d, *J* = 7.7 Hz, Ar-H, 1 H), 7.50 (t, *J* = 7.7 Hz, Ar-H, 1 H), 7.49 (d, *J* = 7.2 Hz, Ar-H, 2 H), 7.41 (t, *J* = 7.7 Hz, Ar-H, 1 H), 7.39 (t, *J* = 7.2 Hz, Ar-H, 2 H), 7.36 (t, *J* = 7.2 Hz, Ar-H, 1 H), 7.28 (d, *J* = 7.7 Hz, Ar-H, 1 H), 7.26 (d, *J* = 7.7 Hz, Ar-H, 1 H), 7.18 (d, *J* = 7.7 Hz, Ar-H, 1 H), 7.13 (t, *J* = 7.7 Hz, Ar-H, 1 H), 5.58 (dd, *J* = 12.1, 3.9 Hz, CH, 1 H), 4.36 (dd, *J* = 12.3, 10.6 Hz, CH, 1 H), 4.00/3.61 (dd+t, *J* = 12.3, 10.6 Hz, *J* = 12.3 Hz, CH<sub>2</sub>, 2 H), 3.82 (s, CH<sub>3</sub>, 3 H), 3.80/3.31 (dd+dd, *J* = 14.0, 12.1 Hz, *J* = 14.0, 3.9 Hz, CH<sub>2</sub>, 2 H), 2.74 (sp, *J* = 6.7 Hz, CH, 1 H), 2.32 (sp, *J* = 6.7 Hz, CH, 2 H), 1.24 (d, *J* = 6.7 Hz, CH<sub>3</sub>, 3 H), 1.13 (d, *J* = 6.7 Hz, CH<sub>3</sub>, 3 H), 1.10 (d, *J* = 6.7 Hz, CH<sub>3</sub>, 3 H), 0.90 (d, *J* = 6.7 Hz, CH<sub>3</sub>, 3 H), 0.62 (s, CH<sub>3</sub>, 9 H). <sup>13</sup>C NMR (125 MHz, DMSO-*d*<sub>6</sub>)  $\delta$  159.6, 157.7, 145.4, 145.4, 136.8, 131.3, 130.8, 130.2, 129.4, 128.6, 128.0, 127.1, 125.3, 125.1, 122.9, 120.5, 111.6, 73.6, 57.2, 55.8, 46.2, 34.6, 34.2, 28.2, 27.5, 25.9, 25.7, 25.5, 23.1, 22.6. HRMS calcd for C<sub>34</sub>H<sub>45</sub>N<sub>2</sub>O [M-Cl]<sup>+</sup> 497.3532, found 497.3530.

**(5*S*,1'*S*)-5-*tert*-butyl-1-(2,6-di(propan-2-yl)phenyl)-3-[1-(3-methoxyphenyl)-2-phenylethyl]-4,5-dihydro-1*H*-imidazol-3-ium chloride [(5*S*,1'*S*)-**9a**]**

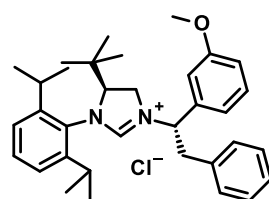

By following the synthetic procedure described for (5*S*,1'*S*)-**3a**, the reaction was performed with 350 mg (2*S*,1'*S*)-**20g** (0.719 mmol). The product (5*S*,1'*S*)-**9a** was collected as white solid (292 mg, 0.548 mmol, 76.2%). mp 240-242°C.  $[\alpha]_{\text{D}}^{20} = -70$  (*c* 0.01, MeOH). ECD (MeCN,  $\lambda$  nm ( $\Delta\epsilon$ ) *c* =  $1.68 \times 10^{-4}$  M): 254 (−10.38), 228 (−1.30), 205 (−6.72), 195 (8.25), 193 (−0.02), 191 (4.27). <sup>1</sup>H NMR (400 MHz, DMSO-*d*<sub>6</sub>)  $\delta$  9.23 (s, CH, 1 H), 7.46 (t, *J* = 7.7 Hz, Ar-H, 1 H), 7.43 (d, *J* = 7.3 Hz, Ar-H, 2 H), 7.42 (t, *J* = 8.0 Hz, Ar-H, 1 H), 7.39 (t, *J* = 7.3 Hz, Ar-H, 2 H), 7.36 (d, *J* = 7.7 Hz, Ar-H, 1 H), 7.34 (d, *J* = 7.7 Hz, Ar-H, 1 H), 7.31 (t, *J* = 7.3 Hz, Ar-H, 1 H), 7.14 (br, Ar-H, 1 H), 7.10 (d, *J* = 8.0 Hz, Ar-H, 1 H), 7.02 (dd, *J* = 8.0, 2.2 Hz, Ar-H, 1 H), 5.41 (dd, *J* = 11.6, 5.2 Hz, CH, 1 H), 4.23 (m, CH, 1 H), 4.23/3.89 (m+m, CH<sub>2</sub>, 2 H), 3.80 (s, CH<sub>3</sub>, 3 H), 3.60/3.40 (dd+dd, *J* = 15.2, 11.6 Hz, *J* = 15.2, 5.2 Hz, CH<sub>2</sub>, 2 H), 2.76 (sp, *J* = 6.7 Hz, CH, 1 H), 2.67 (sp, *J* = 6.7 Hz, CH, 1 H), 1.25 (d, *J* = 6.7 Hz, CH<sub>3</sub>, 3 H), 1.18 (d, *J* = 6.7 Hz, CH<sub>3</sub>, 3 H), 1.17 (d, *J* = 6.7 Hz, CH<sub>3</sub>, 3 H), 1.06 (d, *J* = 6.7 Hz, CH<sub>3</sub>, 3 H), 0.57 (s, CH<sub>3</sub>, 9 H). <sup>13</sup>C NMR (100 MHz, DMSO-*d*<sub>6</sub>)  $\delta$  159.9, 158.8, 145.3, 144.9, 138.8, 136.3, 131.8, 130.4, 130.2, 128.7, 128.7, 127.0, 125.5, 125.3, 119.0, 114.2, 112.7, 73.6, 62.0, 55.3, 50.6, 38.0, 34.9, 28.3, 27.8, 26.0, 25.2, 25.0, 23.2, 22.5. HRMS calcd for C<sub>34</sub>H<sub>45</sub>N<sub>2</sub>O [M-Cl]<sup>+</sup> 497.3532, found 497.3528.

**(5*S*,1'*R*)-5-*tert*-butyl-1-(2,6-di(propan-2-yl)phenyl)-3-[1-(3-methoxyphenyl)-2-phenylethyl]-4,5-dihydro-1*H*-imidazol-3-ium chloride [(5*S*,1'*R*)-**9b**]**

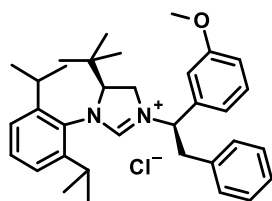

By following the synthetic procedure described for (5*S*,1'*S*)-**3a**, the reaction was performed with 470 mg (2*S*,1'*R*)-**20h** (0.966 mmol). The product (5*S*,1'*R*)-**9b** was collected as white solid (410 mg, 0.769 mmol, 79.6%). mp 252-254°C.  $[\alpha]_{\text{D}}^{20} = +49$  (*c* 0.01, MeOH). ECD (MeCN,  $\lambda$  nm ( $\Delta\epsilon$ ) *c* =  $1.68 \times 10^{-4}$  M): 257 (−5.41), 229 (3.66), 215 (−4.31), 194 (19.52).  $^1\text{H}$  NMR (400 MHz, DMSO-*d*<sub>6</sub>)  $\delta$  8.96 (s, CH, 1 H), 7.54-7.32 (m, Ar-H, 5 H), 7.47 (t, *J* = 8.0 Hz, Ar-H, 1 H), 7.42 (t, *J* = 7.7 Hz, Ar-H, 1 H), 7.30 (d, *J* = 7.7 Hz, Ar-H, 2 H), 7.18 (d, *J* = 8.0 Hz, Ar-H, 1 H), 7.17 (s, Ar-H, 1 H), 7.06 (dd, *J* = 8.0, 2.3 Hz, Ar-H, 1 H), 5.64 (dd, *J* = 12.0, 4.2 Hz, CH, 1 H), 4.43 (dd, *J* = 12.4, 10.3 Hz, CH, 1 H), 4.05/3.82 (dd+m, *J* = 12.4, 10.3 Hz, CH<sub>2</sub>, 2 H), 3.82 (s, CH<sub>3</sub>, 3 H), 3.73/3.41 (dd+dd, *J* = 14.4, 12.0 Hz, *J* = 14.4, 4.2 Hz, CH<sub>2</sub>, 2 H), 2.75 (sp, *J* = 6.7 Hz, CH, 1 H), 2.40 (sp, *J* = 6.7 Hz, CH, 1 H), 1.24 (d, *J* = 6.7 Hz, CH<sub>3</sub>, 3 H), 1.13 (d, *J* = 6.7 Hz, CH<sub>3</sub>, 3 H), 1.05 (d, *J* = 6.7 Hz, CH<sub>3</sub>, 3 H), 0.95 (d, *J* = 6.7 Hz, CH<sub>3</sub>, 3 H), 0.61 (s, CH<sub>3</sub>, 9 H).  $^{13}\text{C}$  NMR (100 MHz, DMSO-*d*<sub>6</sub>)  $\delta$  159.7, 159.4, 145.3, 145.2, 137.5, 136.7, 131.3, 130.4, 130.3, 129.2, 128.7, 127.0, 125.3, 125.2, 119.6, 114.6, 113.4, 73.8, 61.8, 55.2, 46.5, 34.6, 28.3, 27.6, 26.1, 25.6, 25.2, 22.7, 22.3. HRMS calcd for C<sub>34</sub>H<sub>45</sub>N<sub>2</sub>O [M-Cl]<sup>+</sup> 497.3532, found 497.3529.

**(5*S*,1'*S*)-5-*tert*-butyl-1-(2,6-di(propan-2-yl)phenyl)-3-[1-(4-methoxyphenyl)-2-phenylethyl]-4,5-dihydro-1*H*-imidazol-3-ium chloride [(5*S*,1'*S*)-**10a**]**

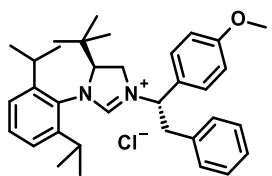

By following the synthetic procedure described for (5*S*,1'*S*)-**3a**, the reaction was performed with 150 mg (2*S*,1'*S*)-**20j** (0.308 mmol). The product (5*S*,1'*S*)-**10a** was collected as white solid (116 mg, 0.218 mmol, 70.6%). mp 249-251°C.  $[\alpha]_{\text{D}}^{20} = -76$  (*c* 0.01, MeOH). ECD (MeCN,  $\lambda$  nm ( $\Delta\epsilon$ ) *c* =  $1.50 \times 10^{-4}$  M): 254 (−5.60), 211 (−2.53), 205 (−5.18), 196 (8.95), 192 (4.72), 190 (12.38).  $^1\text{H}$  NMR (500 MHz, DMSO-*d*<sub>6</sub>)  $\delta$  9.23 (s, CH, 1 H), 7.49 (d, *J* = 8.7 Hz, Ar-H, 2 H), 7.45-7.26 (m, Ar-H, 5 H), 7.45 (t, *J* = 7.8 Hz, Ar-H, 1 H), 7.35 (dm, *J* = 7.8 Hz, Ar-H, 1 H), 7.33 (dm, *J* = 7.8 Hz, Ar-H, 1 H), 7.05 (d, *J* = 8.7 Hz, Ar-H, 2 H), 5.40 (dd, *J* = 11.5, 5.4 Hz, CH, 1 H), 4.20 (m, CH, 1 H), 4.20/3.84 (m+dd, *J* = 8.9, 3.9 Hz, CH<sub>2</sub>, 2 H), 3.79 (s, CH<sub>3</sub>, 3 H), 3.60/3.36 (dd+dd, *J* = 15.0, 11.5 Hz, *J* = 15.0, 5.4 Hz, CH<sub>2</sub>, 2 H), 2.80 (sp, *J* = 6.7 Hz, CH, 1 H), 2.62 (sp, *J* = 6.7 Hz, CH, 1 H), 1.25 (d, *J* = 6.7 Hz, CH<sub>3</sub>, 3 H), 1.19 (d, *J* = 6.7 Hz, CH<sub>3</sub>, 3 H), 1.19 (d, *J* = 6.7 Hz, CH<sub>3</sub>, 3 H), 1.04 (d, *J* = 6.7 Hz, CH<sub>3</sub>, 3 H), 0.57 (s, CH<sub>3</sub>, 9 H).  $^{13}\text{C}$  NMR (125 MHz, DMSO-*d*<sub>6</sub>)  $\delta$  159.6, 158.7, 145.3, 145.0, 136.5, 131.9, 130.4, 129.0, 128.8, 128.6, 128.4, 127.0, 125.4, 125.3, 114.4, 73.6, 61.7, 55.3, 50.2, 38.0, 34.9, 28.3, 27.8, 26.0, 25.2, 25.0, 23.2, 22.5. HRMS calcd for C<sub>34</sub>H<sub>45</sub>N<sub>2</sub>O [M-Cl]<sup>+</sup> 497.3532, found 497.3531.

**(5*S*,1'*R*)-5-*tert*-butyl-1-(2,6-di(propan-2-yl)phenyl)-3-[1-(4-methoxyphenyl)-2-phenylethyl]-4,5-dihydro-1*H*-imidazol-3-ium chloride [(5*S*,1'*R*)-**10b**]**

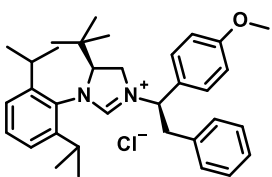

By following the synthetic procedure described for (5*S*,1'*S*)-**3a**, the reaction was performed with 1.35 g (2*S*,1'*R*)-**20i** (2.76 mmol). The product (5*S*,1'*R*)-**10b** was collected as white solid (1.20 g, 2.26 mmol, 81.7%). mp 248-250 °C.  $[\alpha]_{\text{D}}^{20} = +42$  (*c* 0.01, MeOH). ECD (MeCN,  $\lambda$  nm ( $\Delta\epsilon$ ) *c* =  $1.57 \times 10^{-4}$  M): 256 (−5.65), 232 (7.55), 211 (−1.72), 197

(14.55), 190 (1.19).  $^1\text{H}$  NMR (500 MHz, DMSO- $d_6$ )  $\delta$  9.01 (s, CH, 1 H), 7.54 (d,  $J$  = 8.7 Hz, Ar-H, 2 H), 7.53-7.31 (m, Ar-H, 5 H), 7.42 (t,  $J$  = 7.9 Hz, Ar-H, 1 H), 7.29 (dm,  $J$  = 7.9 Hz, Ar-H, 2 H), 7.10 (d,  $J$  = 8.7 Hz, Ar-H, 2 H), 5.69 (dd,  $J$  = 12.0, 4.3 Hz, CH, 1 H), 4.39 (dd,  $J$  = 12.7, 10.1 Hz, CH, 1 H), 4.03/3.78 (dd+t,  $J$  = 12.7, 10.1 Hz,  $J$  = 12.7 Hz, CH<sub>2</sub>, 2 H), 3.81 (s, CH<sub>3</sub>, 3 H), 3.73/3.35 (dd+dd,  $J$  = 14.1, 12.0 Hz,  $J$  = 14.1, 4.3 Hz, CH<sub>2</sub>, 2 H), 2.72 (sp,  $J$  = 6.7 Hz, CH, 1 H), 2.41 (sp,  $J$  = 6.7 Hz, CH, 1 H), 1.23 (d,  $J$  = 6.7 Hz, CH<sub>3</sub>, 3 H), 1.13 (d,  $J$  = 6.7 Hz, CH<sub>3</sub>, 3 H), 1.05 (d,  $J$  = 6.7 Hz, CH<sub>3</sub>, 3 H), 0.95 (d,  $J$  = 6.7 Hz, CH<sub>3</sub>, 3 H), 0.60 (s, CH<sub>3</sub>, 9 H).  $^{13}\text{C}$  NMR (125 MHz, DMSO- $d_6$ )  $\delta$  159.7, 159.2, 145.4, 145.2, 136.9, 131.4, 130.4, 129.2, 129.1, 128.7, 127.8, 127.0, 125.3, 125.2, 114.4, 73.8, 61.3, 55.3, 46.2, 35.0, 34.6, 28.3, 27.6, 26.1, 25.6, 25.2, 22.7, 22.2. HRMS calcd for C<sub>34</sub>H<sub>45</sub>N<sub>2</sub>O [M-Cl]<sup>+</sup> 497.3532, found 497.3528.

**(5*S*,1'*S*)-5-*tert*-butyl-1-(2,6-di(propan-2-yl)phenyl)-3-[1-(*o*-tolyl)-2-phenylethyl]-4,5-dihydro-1*H*-imidazol-3-ium chloride [(5*S*,1'*S*)-11a]**

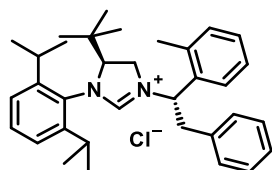

By following the synthetic procedure described for (5*S*,1'*S*)-**3a**, the reaction was performed with 188 mg (2*S*,1'*S*)-**20k** (0.399 mmol). The product (5*S*,1'*S*)-**11a** was collected as white solid (120 mg, 0.232 mmol, 58.1%). mp 247-249°C.  $[\alpha]_{\text{D}}^{20}$  = -80 ( $c$  0.01, MeOH). ECD (MeCN,  $\lambda$  nm ( $\Delta\epsilon$ )  $c$  = 1.27 x 10<sup>-4</sup> M): 282 (-2.44), 276 (-2.02), 255 (-11.64), 227 (0.79), 206 (-7.02), 196 (7.93), 194 (4.50), 190 (13.73).  $^1\text{H}$  NMR (500 MHz, DMSO- $d_6$ )  $\delta$  9.22 (s, CH, 1 H), 7.49-7.27 (m, Ar-H, 12 H), 5.55 (dd,  $J$  = 11.2, 5.0 Hz, CH, 1 H), 4.19 (m, CH, 1 H), 4.19/3.98 (m+m, CH<sub>2</sub>, 2 H), 3.53/3.34 (dd+dd,  $J$  = 15.3, 11.2 Hz,  $J$  = 15.3, 5.0 Hz, CH<sub>2</sub>, 2 H), 2.80 (sp,  $J$  = 6.7 Hz, CH, 1 H), 2.72 (sp,  $J$  = 6.7 Hz, CH, 1 H), 2.44 (s, CH<sub>3</sub>, 3 H), 1.28 (d,  $J$  = 6.7 Hz, CH<sub>3</sub>, 3 H), 1.20 (d,  $J$  = 6.7 Hz, CH<sub>3</sub>, 3 H), 1.15 (d,  $J$  = 6.7 Hz, CH<sub>3</sub>, 3 H), 1.13 (d,  $J$  = 6.7 Hz, CH<sub>3</sub>, 3 H), 0.60 (s, CH<sub>3</sub>, 9 H).  $^{13}\text{C}$  NMR (125 MHz, DMSO- $d_6$ )  $\delta$  159.0, 145.3, 144.9, 136.3, 136.2, 134.8, 131.9, 131.2, 130.4, 128.8, 128.7, 128.6, 127.0, 126.7, 125.5, 125.3, 125.2, 73.7, 58.8, 50.2, 37.8, 35.1, 28.4, 27.9, 25.9, 25.2, 25.0, 23.4, 22.5, 18.6. HRMS calcd for C<sub>34</sub>H<sub>45</sub>N<sub>2</sub> [M-Cl]<sup>+</sup> 481.3583, found 481.3584.

**(5*S*,1'*R*)-5-*tert*-butyl-1-(2,6-di(propan-2-yl)phenyl)-3-[1-(*o*-tolyl)-2-phenylethyl]-4,5-dihydro-1*H*-imidazol-3-ium chloride [(5*S*,1'*R*)-11b]**

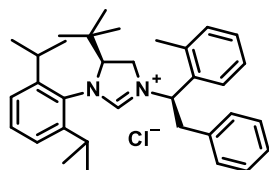

By following the synthetic procedure described for (5*S*,1'*S*)-**3a**, the reaction was performed with 188 mg (2*S*,1'*R*)-**20l** (0.399 mmol). The product (5*S*,1'*R*)-**11b** was collected as white solid (159 mg, 0.307 mmol, 77.0%). mp 213-215°C.  $[\alpha]_{\text{D}}^{20}$  = +31 ( $c$  0.01, MeOH). ECD (MeCN,  $\lambda$  nm ( $\Delta\epsilon$ )  $c$  = 1.60 x 10<sup>-4</sup> M): 272 (-7.37), 269 (-6.34), 266 (-6.87), 228 (1.37), 206 (-8.03), 194 (25.93).  $^1\text{H}$  NMR (500 MHz, DMSO- $d_6$ )  $\delta$  8.81 (s, CH, 1 H), 7.77-7.32 (m, Ar-H, 4 H), 7.56-7.32 (m, Ar-H, 5 H), 7.40 (t,  $J$  = 7.7 Hz, Ar-H, 1 H), 7.29 (dd,  $J$  = 7.7, 1.1 Hz, Ar-H, 1 H), 7.26 (dd,  $J$  = 7.7, 1.1 Hz, Ar-H, 1 H), 5.56 (dd,  $J$  = 11.2, 5.1 Hz, CH, 1 H), 4.38 (m, CH, 1 H), 4.13/3.64 (m+t,  $J$  = 12.5 Hz, CH<sub>2</sub>, 2 H), 3.89/3.29 (dd+dd,  $J$  = 15.3, 11.2 Hz,  $J$  = 15.3, 5.1 Hz, CH<sub>2</sub>, 2 H), 2.75 (sp,  $J$  = 6.7 Hz, CH, 1 H), 2.36 (s, CH<sub>3</sub>, 3 H), 2.31 (sp,  $J$  = 6.7 Hz, CH, 1 H), 1.24 (d,  $J$  = 6.7 Hz, CH<sub>3</sub>, 3 H), 1.15 (d,  $J$  = 6.7 Hz, CH<sub>3</sub>, 3 H), 1.04 (d,  $J$  = 6.7 Hz, CH<sub>3</sub>, 3 H), 0.83 (d,  $J$  = 6.7 Hz, CH<sub>3</sub>, 3 H), 0.68 (s, CH<sub>3</sub>, 9 H).  $^{13}\text{C}$  NMR (125 MHz, DMSO- $d_6$ )  $\delta$  159.6, 145.4, 145.4, 137.8, 136.7, 133.1, 131.3, 131.1, 130.3, 129.6,

129.2, 128.6, 127.3, 127.3, 126.4, 125.4, 125.1, 74.1, 59.6, 46.0, 35.4, 34.6, 28.2, 27.5, 26.2, 25.7, 25.4, 23.1, 22.4, 18.7. HRMS calcd for C<sub>34</sub>H<sub>45</sub>N<sub>2</sub> [M-Cl]<sup>+</sup> 481.3583, found 481.3580.

**(5*S*,1'*S*)-5-*tert*-butyl-1-(2,6-di(propan-2-yl)phenyl)-3-[2-phenyl-1-(*p*-tolyl)ethyl]-4,5-dihydro-1*H*-imidazol-3-ium chloride [(5*S*,1'*S*)-12a]**

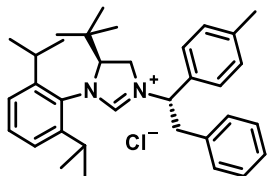

By following the synthetic procedure described for (5*S*,1'*S*)-**3a**, the reaction was performed with 310 mg (2*S*,1'*S*)-**20n** (0.660 mmol). The product (5*S*,1'*S*)-**12a** was collected as white solid (278 mg, 0.538 mmol, 81.6%). mp 260-262°C. [ $\alpha$ ]<sub>D</sub><sup>20</sup> = -87 (*c* 0.01, MeOH). ECD (MeCN,  $\lambda$  nm ( $\Delta\epsilon$ ) *c* = 1.52 x 10<sup>-4</sup> M): 254 (-10.15), 229 (-0.77), 206 (-5.99), 191 (12.30). <sup>1</sup>H NMR (500 MHz, DMSO-*d*<sub>6</sub>)  $\delta$  9.24 (s, CH, 1 H), 7.46-7.27 (m, Ar-H, 5 H), 7.46 (t, *J* = 7.9 Hz, Ar-H, 1 H), 7.43 (m, Ar-H, 2 H), 7.36 (m, Ar-H, 1 H), 7.34 (m, Ar-H, 1 H), 7.31 (m, Ar-H, 2 H), 5.41 (dd, *J* = 11.6, 5.3 Hz, CH, 1 H), 4.20/3.86 (m+m, CH<sub>2</sub>, 2 H), 4.19 (m, CH, 1 H), 3.57/3.37 (dd+dd, *J* = 15.2, 11.6 Hz, *J* = 15.2, 5.3 Hz, CH<sub>2</sub>, 2 H), 2.79 (sp, *J* = 6.7 Hz, CH, 1 H), 2.65 (sp, *J* = 6.7 Hz, CH, 1 H), 2.35 (s, CH<sub>3</sub>, 3 H), 1.25 (d, *J* = 6.7 Hz, CH<sub>3</sub>, 3 H), 1.19 (d, *J* = 6.7 Hz, CH<sub>3</sub>, 3 H), 1.19 (d, *J* = 6.7 Hz, CH<sub>3</sub>, 3 H), 1.06 (d, *J* = 6.7 Hz, CH<sub>3</sub>, 3 H), 0.57 (s, CH<sub>3</sub>, 9 H). <sup>13</sup>C NMR (125 MHz, DMSO-*d*<sub>6</sub>)  $\delta$  158.8, 145.3, 145.0, 138.4, 136.4, 134.3, 131.9, 130.4, 129.6, 129.2, 128.7, 128.6, 127.0, 126.9, 125.4, 125.3, 73.7, 62.0, 50.4, 38.2, 38, 34.9, 28.3, 27.8, 25.9, 25.2, 25.0, 23.2, 22.5, 20.7. HRMS calcd for C<sub>34</sub>H<sub>45</sub>N<sub>2</sub> [M-Cl]<sup>+</sup> 481.3583, found 481.3581.

**(5*S*,1'*R*)-5-*tert*-butyl-1-(2,6-di(propan-2-yl)phenyl)-3-[2-phenyl-1-(*p*-tolyl)ethyl]-4,5-dihydro-1*H*-imidazol-3-ium chloride [(5*S*,1'*R*)-12b]**

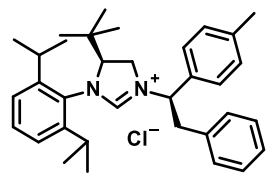

By following the synthetic procedure described for (5*S*,1'*S*)-**3a**, the reaction was performed with 430 mg (2*S*,1'*R*)-**20m** (0.915 mmol). The product (5*S*,1'*R*)-**12b** was collected as white solid (358 mg, 0.692 mmol, 75.8%). mp 265-267°C. [ $\alpha$ ]<sub>D</sub><sup>20</sup> = +50 (*c* 0.01, MeOH). ECD (MeCN,  $\lambda$  nm ( $\Delta\epsilon$ ) *c* = 1.51 x 10<sup>-4</sup> M): 263 (-4.95), 228 (5.06), 210 (-1.33), 196 (15.40), 190 (-6.25). <sup>1</sup>H NMR (500 MHz, DMSO-*d*<sub>6</sub>)  $\delta$  8.99 (s, CH, 1 H), 7.53-7.31 (m, Ar-H, 5 H), 7.49 (d, *J* = 8.0 Hz, Ar-H, 2 H), 7.42 (t, *J* = 7.9 Hz, Ar-H, 1 H), 7.36 (d, *J* = 8.0 Hz, Ar-H, 2 H), 7.30 (dd, *J* = 7.9, 1.8 Hz, Ar-H, 1 H), 7.29 (dd, *J* = 7.9, 1.8 Hz, Ar-H, 1 H), 5.67 (dd, *J* = 12.0, 4.0 Hz, CH, 1 H), 4.40 (dd, *J* = 12.5, 10.5 Hz, CH, 1 H), 4.03/3.78 (dd+t, *J* = 12.5, 10.5 Hz, *J* = 12.5 Hz, CH<sub>2</sub>, 2 H), 3.73/3.37 (dd+dd, *J* = 14.2, 12.0 Hz, *J* = 14.2, 4.0 Hz, CH<sub>2</sub>, 2 H), 2.72 (sp, *J* = 6.7 Hz, CH, 1 H), 2.42 (sp, *J* = 6.7 Hz, CH, 1 H), 2.37 (s, CH<sub>3</sub>, 3 H), 1.23 (d, *J* = 6.7 Hz, CH<sub>3</sub>, 3 H), 1.13 (d, *J* = 6.7 Hz, CH<sub>3</sub>, 3 H), 1.05 (d, *J* = 6.7 Hz, CH<sub>3</sub>, 3 H), 0.95 (d, *J* = 6.7 Hz, CH<sub>3</sub>, 3 H), 0.60 (s, CH<sub>3</sub>, 9 H). <sup>13</sup>C NMR (125 MHz, DMSO-*d*<sub>6</sub>)  $\delta$  159.3, 145.4, 145.2, 138.6, 136.8, 133.0, 131.3, 130.4, 129.7, 129.5, 129.2, 128.7, 127.6, 127.0, 125.3, 125.2, 73.8, 61.5, 46.3, 34.8, 34.6, 28.2, 27.6, 26.1, 25.6, 25.2, 22.7, 22.2, 20.8. HRMS calcd for C<sub>34</sub>H<sub>45</sub>N<sub>2</sub> [M-Cl]<sup>+</sup> 481.3583, found 481.3580.

**(5*S*,1'*S*)-5-*tert*-butyl-1-(2,6-di(propan-2-yl)phenyl)-3-[2-phenyl-1-[4-(trifluoromethyl)phenyl]ethyl]-4,5-dihydro-1*H*-imidazol-3-ium chloride [(5*S*,1'*S*)-13a]**

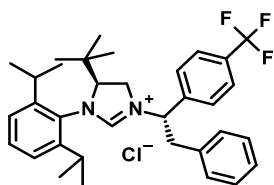

By following the synthetic procedure described for (5*S*,1'*S*)-**3a**, the reaction was performed with 1.05 g (2*S*,1'*S*)-**20p** (2.00 mmol). The product (5*S*,1'*S*)-**13a** was collected as white solid (598 mg, 1.05 mmol, 52.3%). mp 271-273°C.  $[\alpha]_{\text{D}}^{20} = -70$  (*c* 0.01, MeOH). ECD (MeCN,  $\lambda$  nm ( $\Delta\epsilon$ ) *c* =  $1.48 \times 10^{-4}$  M): 255 (–11.18), 221 (0.79), 207 (–7.65), 196 (6.28).  $^1\text{H}$  NMR (500 MHz, DMSO-*d*<sub>6</sub>)  $\delta$  9.37 (s, CH, 1 H), 7.91 (d, *J* = 8.2 Hz, Ar-H, 2 H), 7.80 (d, *J* = 8.2 Hz, Ar-H, 2 H), 7.49-7.29 (m, Ar-H, 8 H), 5.61 (dd, *J* = 11.5, 5.4 Hz, CH, 1 H), 4.25/3.90 (dd+dd, *J* = 11.9, 7.1 Hz, *J* = 11.9, 7.1 Hz, CH<sub>2</sub>, 2 H), 4.22 (dd, *J* = 11.9, 7.1 Hz, CH, 1 H), 3.64/3.46 (dd+dd, *J* = 15.1, 11.5 Hz, *J* = 15.1, 5.4 Hz, CH<sub>2</sub>, 2 H), 2.78 (sp, *J* = 6.7 Hz, CH, 1 H), 2.67 (sp, *J* = 6.7 Hz, CH, 1 H), 1.25 (d, *J* = 6.7 Hz, CH<sub>3</sub>, 3 H), 1.19 (d, *J* = 6.7 Hz, CH<sub>3</sub>, 6 H), 1.07 (d, *J* = 6.7 Hz, CH<sub>3</sub>, 3 H), 0.57 (s, CH<sub>3</sub>, 9 H).  $^{13}\text{C}$  NMR (125 MHz, DMSO-*d*<sub>6</sub>)  $\delta$  159.2, 145.3, 144.9, 142.0, 136.0, 131.8, 130.4, 128.8, 128.7, 128.0, 127.1, 126.1, 126.1, 125.5, 125.3, 73.8, 61.5, 50.9, 38.0, 34.9, 28.3, 27.8, 26.0, 25.2, 25.0, 23.2, 22.5. HRMS calcd for C<sub>34</sub>H<sub>42</sub>F<sub>3</sub>N<sub>2</sub> [M-Cl]<sup>+</sup> 535.3300, found 535.3302.

**(5*S*,1'*R*)-5-*tert*-butyl-1-(2,6-di(propan-2-yl)phenyl)-3-[2-phenyl-1-[4-(trifluoromethyl)phenyl]ethyl]-4,5-dihydro-1*H*-imidazol-3-ium chloride [(5*S*,1'*R*)-**13b**]**

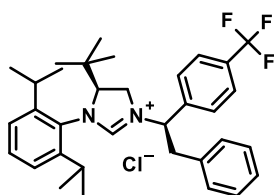

By following the synthetic procedure described for (5*S*,1'*S*)-**3a**, the reaction was performed with 1.35 g (2*S*,1'*R*)-**20o** (2.57 mmol). The product (5*S*,1'*R*)-**13b** was collected as white solid (1.31 g, 2.30 mmol, 89.3%). mp 262-264°C.  $[\alpha]_{\text{D}}^{20} = +33$  (*c* 0.01, MeOH). ECD (MeCN,  $\lambda$  nm ( $\Delta\epsilon$ ) *c* =  $1.50 \times 10^{-4}$  M): 270 (–5.72), 263 (–5.24), 263 (–6.11), 230 (2.87), 222 (0.26), 213 (2.54), 207 (–2.04), 194 (23.15).  $^1\text{H}$  NMR (500 MHz, DMSO-*d*<sub>6</sub>)  $\delta$  9.21 (s, CH, 1 H), 7.96 (d, *J* = 8.2 Hz, Ar-H, 2 H), 7.88 (d, *J* = 8.2 Hz, Ar-H, 2 H), 7.59-7.30 (m, Ar-H, 5 H), 7.43 (t, *J* = 7.7 Hz, Ar-H, 1 H), 7.29 (d, *J* = 7.7 Hz, Ar-H, 1 H), 7.29 (d, *J* = 7.7 Hz, Ar-H, 1 H), 5.97 (dd, *J* = 12.1, 4.3 Hz, CH, 1 H), 4.43 (dd, *J* = 12.3, 10.5 Hz, CH, 1 H), 4.07/3.84 (dd+t, *J* = 12.3, 10.5 Hz, *J* = 12.3 Hz, CH<sub>2</sub>, 2 H), 3.80/3.45 (dd+dd, *J* = 14.0, 12.1 Hz, *J* = 14.0, 4.3 Hz, CH<sub>2</sub>, 2 H), 2.75 (sp, *J* = 6.8 Hz, CH, 1 H), 2.37 (sp, *J* = 6.8 Hz, CH, 1 H), 1.23 (d, *J* = 6.8 Hz, CH<sub>3</sub>, 3 H), 1.13 (d, *J* = 6.8 Hz, CH<sub>3</sub>, 3 H), 1.05 (d, *J* = 6.8 Hz, CH<sub>3</sub>, 3 H), 0.96 (d, *J* = 6.8 Hz, CH<sub>3</sub>, 3 H), 0.60 (s, CH<sub>3</sub>, 9 H).  $^{13}\text{C}$  NMR (125 MHz, DMSO-*d*<sub>6</sub>)  $\delta$  159.7, 145.4, 145.2, 140.6, 136.4, 131.2, 130.4, 129.2, 128.8, 128.7, 128.5, 127.3, 127.1, 126.1, 126.1, 126.0, 125.3, 125.2, 73.9, 60.8, 46.4, 34.6, 34.6, 28.2, 27.6, 26.2, 25.6, 25.3, 22.6, 22.2. HRMS calcd for C<sub>34</sub>H<sub>42</sub>F<sub>3</sub>N<sub>2</sub> [M-Cl]<sup>+</sup> 535.3300, found 535.3300.

**(5*S*,1'*S*)-5-*tert*-butyl-1-(2,6-di(propan-2-yl)phenyl)-3-[1-phenyl-2-(*p*-tolyl)ethyl]-4,5-dihydro-1*H*-imidazol-3-ium chloride [(5*S*,1'*S*)-**14a**]**

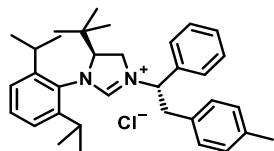

By following the synthetic procedure described for (5*S*,1'*S*)-**3a**, the reaction was performed with 195 mg (2*S*,1'*S*)-**20q** (0.414 mmol). The product (5*S*,1'*S*)-**14a** was collected as white solid (211 mg, 0.408 mmol, 98.5%). mp 268-270°C.  $[\alpha]_{\text{D}}^{20} = -88$  (*c* 0.01, MeOH). ECD (MeCN,  $\lambda$  nm ( $\Delta\epsilon$ ) *c* =  $1.53 \times 10^{-4}$  M): 253 (–10.46), 225 (–0.60), 207 (–5.61), 198 (3.76), 195 (–2.59).  $^1\text{H}$  NMR (500 MHz, DMSO-*d*<sub>6</sub>)  $\delta$  9.17 (s, CH, 1 H), 7.57-7.32 (m, Ar-H, 8 H), 7.29 (d, *J* = 7.8 Hz, Ar-H, 2 H), 7.19 (d, *J* = 7.8 Hz, Ar-H, 2 H), 5.41 (dd, *J* = 11.5, 5.5 Hz, CH, 1

H), 4.22 (m, CH, 1 H), 4.22/3.83 (m+m, CH<sub>2</sub>, 2 H), 3.52/3.37 (dd+dd,  $J = 15.2, 11.5$  Hz,  $J = 15.2, 5.5$  Hz, CH<sub>2</sub>, 2 H), 2.79 (sp,  $J = 6.7$  Hz, CH, 1 H), 2.66 (sp,  $J = 6.7$  Hz, CH, 1 H), 2.30 (s, CH<sub>3</sub>, 3 H), 1.25 (d,  $J = 6.7$  Hz, CH<sub>3</sub>, 3 H), 1.20 (d,  $J = 6.7$  Hz, CH<sub>3</sub>, 3 H), 1.18 (d,  $J = 6.7$  Hz, CH<sub>3</sub>, 3 H), 1.05 (d,  $J = 6.7$  Hz, CH<sub>3</sub>, 3 H), 0.57 (s, CH<sub>3</sub>, 9 H). <sup>13</sup>C NMR (125 MHz, DMSO-*d*<sub>6</sub>)  $\delta$  158.9, 145.3, 145.0, 137.3, 136.1, 133.2, 131.8, 130.4, 129.2, 129.1, 128.9, 128.6, 126.9, 125.5, 125.3, 73.7, 64.9, 62.2, 50.4, 37.7, 34.9, 28.3, 27.8, 25.9, 25.1, 25.0, 23.2, 22.5, 20.6. HRMS calcd for C<sub>34</sub>H<sub>45</sub>N<sub>2</sub> [M-Cl]<sup>+</sup> 481.3583, found 481.3577.

**(5*S*,1'*R*)-5-*tert*-butyl-1-(2,6-di(propan-2-yl)phenyl)-3-[1-phenyl-2-(*p*-tolyl)ethyl]-4,5-dihydro-1*H*-imidazol-3-ium chloride [(5*S*,1'*R*)-**14b**]**

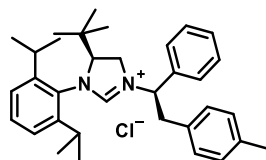

By following the synthetic procedure described for (5*S*,1'*S*)-**3a**, the reaction was performed with 110 mg (2*S*,1'*R*)-**20r** (0.234 mmol). The product (5*S*,1'*R*)-**14b** was collected as white solid (84 mg, 0.162 mmol, 69.5%). mp 279-281 °C. [ $\alpha$ ]<sub>D</sub><sup>20</sup> = +45 (*c* 0.01, MeOH). ECD (MeCN,  $\lambda$  nm ( $\Delta\epsilon$ ) *c* = 1.67 x 10<sup>-4</sup> M): 262 (−3.77), 231 (2.32), 221 (−3.69), 199 (11.96), 191 (−27.46). <sup>1</sup>H NMR (500 MHz, DMSO-*d*<sub>6</sub>)  $\delta$  8.93 (s, CH, 1 H), 7.62-7.46 (m, Ar-H, 5 H), 7.43 (t,  $J = 7.7$  Hz, Ar-H, 1 H), 7.38 (d,  $J = 7.8$  Hz, Ar-H, 2 H), 7.30 (d,  $J = 7.7$  Hz, Ar-H, 2 H), 7.21 (d,  $J = 7.8$  Hz, Ar-H, 2 H), 5.61 (dd,  $J = 12.0, 4.2$  Hz, CH, 1 H), 4.44 (dd,  $J = 12.6, 10.4$  Hz, CH, 1 H), 4.04/3.80 (dd+t,  $J = 12.6, 10.4$  Hz,  $J = 12.6$  Hz, CH<sub>2</sub>, 2 H), 3.69/3.35 (dd+dd,  $J = 14.5, 12.0$  Hz,  $J = 14.5, 4.2$  Hz, CH<sub>2</sub>, 2 H), 2.74 (sp,  $J = 6.7$  Hz, CH, 1 H), 2.42 (sp,  $J = 6.7$  Hz, CH, 1 H), 2.34 (s, CH<sub>3</sub>, 3 H), 1.24 (d,  $J = 6.7$  Hz, CH<sub>3</sub>, 3 H), 1.14 (d,  $J = 6.7$  Hz, CH<sub>3</sub>, 3 H), 1.05 (d,  $J = 6.7$  Hz, CH<sub>3</sub>, 3 H), 0.94 (d,  $J = 6.7$  Hz, CH<sub>3</sub>, 3 H), 0.61 (s, CH<sub>3</sub>, 9 H). <sup>13</sup>C NMR (125 MHz, DMSO-*d*<sub>6</sub>)  $\delta$  159.3, 145.4, 145.2, 136.0, 133.6, 131.3, 130.4, 129.3, 129.2, 129.1, 129.1, 127.7, 125.3, 125.2, 73.8, 62.0, 46.4, 34.6, 34.4, 28.3, 27.7, 25.9, 25.6, 25.2, 22.7, 22.2, 20.8. HRMS calcd for C<sub>34</sub>H<sub>45</sub>N<sub>2</sub> [M-Cl]<sup>+</sup> 481.3583, found 481.3580.

**(5*S*,1'*S*)-5-*tert*-butyl-3-[2-(4-chlorophenyl)-1-phenylethyl]-1-(2,6-di(propan-2-yl)phenyl)-4,5-dihydro-1*H*-imidazol-3-ium chloride [(5*S*,1'*S*)-**15a**]**

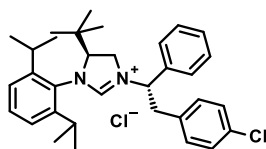

By following the synthetic procedure described for (5*S*,1'*S*)-**3a**, the reaction was performed with 250 mg (2*S*,1'*S*)-**20s** (0.509 mmol). The product (5*S*,1'*S*)-**15a** was collected as white solid (219 mg, 0.407 mmol, 80.0%). mp 284-286 °C. [ $\alpha$ ]<sub>D</sub><sup>20</sup> = −82 (*c* 0.01, MeOH). ECD (MeCN,  $\lambda$  nm ( $\Delta\epsilon$ ) *c* = 1.62 x 10<sup>-4</sup> M): 253 (−11.34), 225 (2.47), 206 (−7.99), 197 (8.17). <sup>1</sup>H NMR (400 MHz, DMSO-*d*<sub>6</sub>)  $\delta$  9.26 (s, CH, 1 H), 7.58-7.30 (m, Ar-H, 12 H), 5.50 (dd,  $J = 11.4, 5.4$  Hz, CH, 1 H), 4.24 (m, CH, 1 H), 4.24/3.86 (m+m, CH<sub>2</sub>, 2 H), 3.64/3.42 (dd+dd,  $J = 15.3, 11.4$  Hz,  $J = 15.3, 5.4$  Hz, CH<sub>2</sub>, 2 H), 2.78 (sp,  $J = 6.7$  Hz, CH, 1 H), 2.64 (sp,  $J = 6.7$  Hz, CH, 1 H), 1.26 (d,  $J = 6.7$  Hz, CH<sub>3</sub>, 3 H), 1.21 (d,  $J = 6.7$  Hz, CH<sub>3</sub>, 3 H), 1.17 (d,  $J = 6.7$  Hz, CH<sub>3</sub>, 3 H), 1.05 (d,  $J = 6.7$  Hz, CH<sub>3</sub>, 3 H), 0.60 (s, CH<sub>3</sub>, 9 H). <sup>13</sup>C NMR (100 MHz, DMSO-*d*<sub>6</sub>)  $\delta$  159.0, 145.3, 144.9, 136.9, 135.5, 131.7, 131.7, 130.7, 130.4, 129.2, 129.0, 128.6, 127.0, 125.5, 125.3, 73.7, 64.9, 61.8, 49.9, 36.9, 34.9, 28.4, 27.9, 25.9, 25.1, 25.1, 23.2, 22.5. HRMS calcd for C<sub>33</sub>H<sub>42</sub>ClN<sub>2</sub> [M-Cl]<sup>+</sup> 501.3037, found 501.3036.

**(5*S*,1'*R*)-5-*tert*-butyl-3-[2-(4-chlorophenyl)-1-phenylethyl]-1-(2,6-di(propan-2-yl)phenyl)-4,5-dihydro-1*H*-imidazol-3-ium chloride [(5*S*,1'*R*)-15b]**

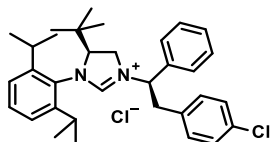

By following the synthetic procedure described for (5*S*,1'*S*)-**3a**, the reaction was performed with 280 mg (2*S*,1'*R*)-**20t** (0.570 mmol). The product (5*S*,1'*R*)-**15b** was collected as white solid (264 mg, 0.491 mmol, 86.1%). mp 282-284 °C.  $[\alpha]_{\text{D}}^{20} = +36$  (*c* 0.01, MeOH). ECD (MeCN,  $\lambda$  nm ( $\Delta\epsilon$ ) *c* =  $1.19 \times 10^{-4}$  M): 263 (−3.33), 233 (3.65), 222 (−6.52), 212 (0.50), 209 (−0.08), 198 (17.12), 190 (−12.15). <sup>1</sup>H NMR (400 MHz, DMSO-*d*<sub>6</sub>)  $\delta$  9.06 (s, CH, 1 H), 7.64-7.46 (m, Ar-H, 9 H), 7.43 (t, *J* = 7.8 Hz, Ar-H, 1 H), 7.30 (d, *J* = 7.8 Hz, Ar-H, 2 H), 5.71 (dd, *J* = 12.1, 4.1 Hz, CH, 1 H), 4.45 (dd, *J* = 12.1, 10.4 Hz, CH, 1 H), 4.06/3.80 (dd+dd, *J* = 12.1, 10.4 Hz, *J* = 12.1, 4.7 Hz, CH<sub>2</sub>, 2 H), 3.77/3.40 (dd+dm, *J* = 12.1, 6.1 Hz, *J* = 4.1 Hz, CH<sub>2</sub>, 2 H), 2.74 (sp, *J* = 6.7 Hz, CH, 1 H), 2.37 (sp, *J* = 6.7 Hz, CH, 1 H), 1.24 (d, *J* = 6.7 Hz, CH<sub>3</sub>, 3 H), 1.17 (d, *J* = 6.7 Hz, CH<sub>3</sub>, 3 H), 1.05 (d, *J* = 6.7 Hz, CH<sub>3</sub>, 3 H), 0.98 (d, *J* = 6.7 Hz, CH<sub>3</sub>, 3 H), 0.62 (s, CH<sub>3</sub>, 9 H). <sup>13</sup>C NMR (100 MHz, DMSO-*d*<sub>6</sub>)  $\delta$  159.4, 145.3, 145.1, 135.9, 135.7, 131.8, 131.2, 130.5, 129.2, 128.7, 127.7, 125.3, 125.2, 73.8, 61.8, 46.3, 34.6, 34.1, 28.3, 27.8, 25.9, 25.6, 25.2, 22.6, 22.2. HRMS calcd for C<sub>33</sub>H<sub>42</sub>ClN<sub>2</sub> [M-Cl]<sup>+</sup> 501.3037, found 501.3036.

**(5*S*,1'*S*)-5-*tert*-butyl-3-[2-(2-chlorophenyl)-1-phenylethyl]-1-(2,6-di(propan-2-yl)phenyl)-4,5-dihydro-1*H*-imidazol-3-ium chloride [(5*S*,1'*S*)-16a]**

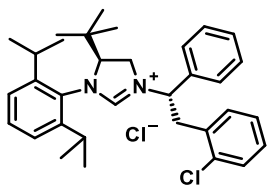

By following the synthetic procedure described for (5*S*,1'*S*)-**3a**, the reaction was performed with 2.02 g (2*S*,1'*S*)-**20u** (4.11 mmol). The product (5*S*,1'*S*)-**16a** was collected as white solid (1.39 g, 2.58 mmol, 62.7%). mp 278-280 °C.  $[\alpha]_{\text{D}}^{20} = -97$  (*c* 0.01, MeOH). ECD (MeCN,  $\lambda$  nm ( $\Delta\epsilon$ ) *c* =  $1.59 \times 10^{-4}$  M): 254 (−10.34), 227 (−0.92), 207 (−8.45), 191 (18.80). <sup>1</sup>H NMR (500 MHz, DMSO-*d*<sub>6</sub>)  $\delta$  9.32 (s, CH, 1 H), 7.60-7.31 (m, Ar-H, 12 H), 5.50 (dd, *J* = 10.7, 5.1 Hz, CH, 1 H), 4.34 (m, CH, 1 H), 4.33/3.95 (m+dd, *J* = 10.3, 6.1 Hz, CH<sub>2</sub>, 2 H), 3.80/3.47 (dd+dd, *J* = 15.5, 10.7 Hz, *J* = 15.5, 5.1 Hz, CH<sub>2</sub>, 2 H), 2.89 (sp, *J* = 6.7 Hz, CH, 1 H), 2.73 (sp, *J* = 6.7 Hz, CH, 1 H), 1.28 (d, *J* = 6.7 Hz, CH<sub>3</sub>, 3 H), 1.21 (d, *J* = 6.7 Hz, CH<sub>3</sub>, 3 H), 1.10 (d, *J* = 6.7 Hz, CH<sub>3</sub>, 3 H), 1.06 (d, *J* = 6.7 Hz, CH<sub>3</sub>, 3 H), 0.65 (s, CH<sub>3</sub>, 9 H). <sup>13</sup>C NMR (125 MHz, DMSO-*d*<sub>6</sub>)  $\delta$  159.1, 145.4, 145.0, 136.7, 133.8, 133.6, 131.8, 130.7, 130.4, 129.8, 129.2, 129.1, 129.1, 127.3, 127.0, 125.5, 125.2, 73.8, 60.7, 49.7, 35.3, 28.3, 28.0, 25.5, 25.3, 25.2, 23.2, 22.5. HRMS calcd for C<sub>33</sub>H<sub>42</sub>ClN<sub>2</sub> [M-Cl]<sup>+</sup> 501.3037, found 501.3011.

**(5*S*,1'*R*)-5-*tert*-butyl-3-[2-(2-chlorophenyl)-1-phenylethyl]-1-(2,6-di(propan-2-yl)phenyl)-4,5-dihydro-1*H*-imidazol-3-ium chloride [(5*S*,1'*R*)-16b]**

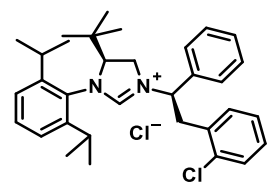

By following the synthetic procedure described for (5*S*,1'*S*)-**3a**, the reaction was performed with 941 mg (2*S*,1'*R*)-**20v** (1.92 mmol). The product (5*S*,1'*R*)-**16b** was collected as white solid (625 mg, 1.16 mmol, 60.7%). mp 267-269 °C.  $[\alpha]_{\text{D}}^{20} = +70$  (*c* 0.01, MeOH). ECD (MeCN,  $\lambda$  nm ( $\Delta\epsilon$ ) *c* =  $1.81 \times 10^{-4}$  M): 259 (−4.17), 229 (4.03), 207 (−5.37), 196 (6.59), 191 (−9.05). <sup>1</sup>H NMR (500 MHz, DMSO-*d*<sub>6</sub>)  $\delta$  9.06 (s, CH, 1 H), 7.68-7.26 (m, Ar-H, 12 H), 5.66 (dd, *J* = 11.2, 4.1 Hz, CH, 1 H), 4.51 (dd, *J* = 12.3, 10.4 Hz, CH, 1 H), 4.17/3.88



(dd+dd,  $J = 12.6, 10.4$  Hz,  $J = 12.6, 12.3$  Hz, CH<sub>2</sub>, 2 H), 3.88/3.49 (dd+dd,  $J = 14.5, 11.2$  Hz,  $J = 14.5, 4.1$  Hz, CH<sub>2</sub>, 2 H), 2.77 (sp,  $J = 6.7$  Hz, CH, 1 H), 2.53 (sp,  $J = 6.7$  Hz, CH, 1 H), 1.25 (d,  $J = 6.7$  Hz, CH<sub>3</sub>, 3 H), 1.18 (d,  $J = 6.7$  Hz, CH<sub>3</sub>, 3 H), 1.07 (d,  $J = 6.7$  Hz, CH<sub>3</sub>, 3 H), 0.91 (d,  $J = 6.7$  Hz, CH<sub>3</sub>, 3 H), 0.69 (s, CH<sub>3</sub>, 9 H). <sup>13</sup>C NMR (125 MHz, DMSO-*d*<sub>6</sub>)  $\delta$  159.7, 145.4, 145.1, 135.7, 134.1, 133.5, 131.7, 131.2, 130.5, 130.0, 129.4, 129.3, 127.6, 127.4, 125.4, 125.2, 74.0, 60.4, 47.0, 33.5, 28.3, 27.8, 25.8, 25.7, 25.2, 22.7, 22.2. HRMS calcd for C<sub>33</sub>H<sub>42</sub>ClN<sub>2</sub> [M-Cl]<sup>+</sup> 501.3037, found 501.3020.

**(1'*R*)-3-[2-(4-chlorophenyl)-1-phenylethyl]-1-(2,6-di(propan-2-yl)phenyl)-4,5-dihydro-1*H*-imidazol-3-ium chloride [(*R*)-17a]**

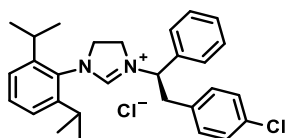

By following the synthetic procedure described for (5*S*,1'*S*)-**3a**, the reaction was performed with 713 mg (*R*)-**20x** (1.64 mmol). The product (*R*)-**17a** was collected as a white solid (309 mg, 0.641 mmol, 39.2%). mp 87-89 °C.  $[\alpha]_{\text{D}}^{20} = -51$  (*c* 0.01, MeOH). ECD (MeCN,  $\lambda$  nm ( $\Delta\epsilon$ ) *c* =  $2.91 \times 10^{-4}$  M): 247 (−4.32), 221 (5.74), 209 (−0.80), 207 (1.12), 204 (0.13), 197 (7.06), 194 (4.91), 192 (8.64). <sup>1</sup>H NMR (500 MHz, DMSO-*d*<sub>6</sub>)  $\delta$  9.24 (s, CH, 1 H), 7.56-7.42 (m, Ar-H, 10 H), 7.33 (d,  $J = 7.8$  Hz, Ar-H, 2 H), 5.42 (dd,  $J = 11.0, 5.1$  Hz, CH, 1 H), 4.29-3.81 (m, CH<sub>2</sub>, 4 H), 3.63/3.38 (dd+dd,  $J = 14.5, 11.0$  Hz,  $J = 14.5, 5.1$  Hz, CH<sub>2</sub>, 2 H), 2.69 (sp,  $J = 6.7$  Hz, CH, 1 H), 2.35 (sp,  $J = 6.7$  Hz, CH, 1 H), 1.17 (d,  $J = 6.7$  Hz, CH<sub>3</sub>, 3 H), 1.16 (d,  $J = 6.7$  Hz, CH<sub>3</sub>, 3 H), 1.08 (d,  $J = 6.7$  Hz, CH<sub>3</sub>, 3 H), 1.02 (d,  $J = 6.7$  Hz, CH<sub>3</sub>, 3 H). <sup>13</sup>C NMR (125 MHz, DMSO-*d*<sub>6</sub>)  $\delta$  157.9, 146.1, 136.5, 135.9, 131.7, 130.9, 130.8, 130.1, 129.2, 129.0, 128.7, 127.3, 124.7, 124.7, 62.0, 52.7, 46.2, 35.8, 28.0, 28.0, 24.6, 24.5, 23.5, 23.3. HRMS calcd for C<sub>29</sub>H<sub>34</sub>ClN<sub>2</sub> [M-Cl]<sup>+</sup> 445.2411, found 445.2405.

**(1'*S*)-3-[2-(4-chlorophenyl)-1-phenylethyl]-1-(2,6-di(propan-2-yl)phenyl)-4,5-dihydro-1*H*-imidazol-3-ium chloride [(*S*)-17b]**

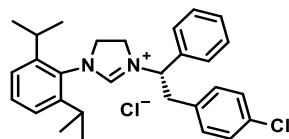

By following the synthetic procedure described for (5*S*,1'*S*)-**3a**, the reaction was performed with 669 mg (*S*)-**20w** (1.53 mmol). The product (*S*)-**17b** was collected as off-white solid (369 mg, 0.766 mmol, 49.8%). mp 83-85 °C.  $[\alpha]_{\text{D}}^{20} = +40$  (*c* 0.01, MeOH). ECD (MeCN,  $\lambda$  nm ( $\Delta\epsilon$ ) *c* =  $2.83 \times 10^{-4}$  M): 241 (5.37), 222 (−4.96), 207 (0.95), 194 (11.35). <sup>1</sup>H NMR (500 MHz, DMSO-*d*<sub>6</sub>)  $\delta$  9.24 (s, CH, 1 H), 7.56-7.42 (m, Ar-H, 10 H), 7.33 (d,  $J = 7.8$  Hz, Ar-H, 2 H), 5.42 (dd,  $J = 11.0, 5.1$  Hz, CH, 1 H), 4.29-3.81 (m, CH<sub>2</sub>, 4 H), 3.63/3.38 (dd+dd,  $J = 14.5, 11.0$  Hz,  $J = 14.5, 5.1$  Hz, CH<sub>2</sub>, 2 H), 2.69 (sp,  $J = 6.7$  Hz, CH, 1 H), 2.35 (sp,  $J = 6.7$  Hz, CH, 1 H), 1.17 (d,  $J = 6.7$  Hz, CH<sub>3</sub>, 3 H), 1.16 (d,  $J = 6.7$  Hz, CH<sub>3</sub>, 3 H), 1.08 (d,  $J = 6.7$  Hz, CH<sub>3</sub>, 3 H), 1.02 (d,  $J = 6.7$  Hz, CH<sub>3</sub>, 3 H). <sup>13</sup>C NMR (125 MHz, DMSO-*d*<sub>6</sub>)  $\delta$  157.9, 146.1, 136.5, 135.9, 131.7, 130.9, 130.8, 130.1, 129.2, 129.0, 128.7, 127.3, 124.7, 124.7, 62.0, 52.7, 46.2, 35.8, 28.0, 28.0, 24.6, 24.5, 23.5, 23.3. HRMS calcd for C<sub>29</sub>H<sub>34</sub>ClN<sub>2</sub> [M-Cl]<sup>+</sup> 445.2411, found 445.2405.

## 1.2 General Procedure for Preparation of Aldehyde (18a-b)

### (S)-2-(2,6-di(propan-2-yl)anilino)-3,3-dimethylbutanal [(S)-18a]

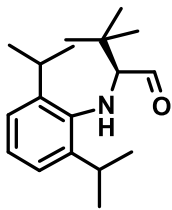

(S)-18a was prepared by following published procedures.<sup>1</sup>

### (2R)-2-(2,6-di(propan-2-yl)anilino)-3,3-dimethylbutanal [(2R)-18b]

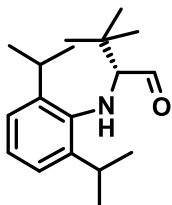

(R)-18b was prepared by following published procedures.<sup>1</sup>

## 1.3 General Procedure for Preparation of Butane-1,2-diamine (19a-c)

Example for compound 19a:

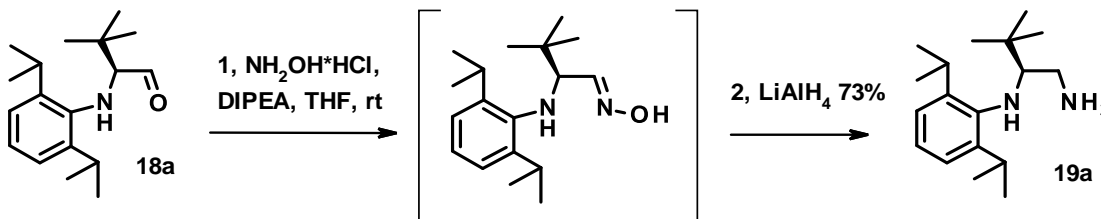

15.9 g (S)-18a (57.77 mmol) was dissolved in 115 mL THF (2 mL/mmol) under inert atmosphere then 6.02 g, hydroxylamine hydrogen chloride (86.66 mmol) and 30.2 mL DIPEA (173.3 mmol) were added at room temperature. The reaction mixture was stirred for 5 hours, the expected oxime intermediate formed. In the next step 8.77 g LiAlH<sub>4</sub> (231.1 mmol) was suspended in 288 mL THF (5 mL/mmol) at 0°C and the previous mixture was added slowly to the reaction mixture after filtration off the DIPEA hydrochloride, then it was stirred for 16 hours at room temperature. Reaction progress was monitored by HPLC.

The reaction mixture was cooled to 0°C, 8.7 ml water, 17.4 ml 2M NaOH and 17.4 ml water was added. 80 mL MTBE was added to the mixture at the previous temperature and stirred for 10 min. The mixture was filtered, washed with MTBE. The crude product was purified *via* column chromatography using DCM and 1.2% methanolic ammonia as eluents.

### (2S)-N-(2,6-di(propan-2-yl)phenyl)-3,3-dimethylbutane-1,2-diamine [(S)-19a]

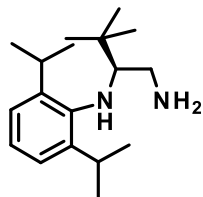

(S)-19a was collected as a yellow oil (12.0 g, 43.4 mmol, 75.2%). <sup>1</sup>H NMR (500 MHz, DMSO-*d*<sub>6</sub>) δ 7.00 (d, *J* = 7.6 Hz, Ar-H, 2 H), 6.87 (t, *J* = 7.6 Hz, Ar-H, 1 H), 3.38 (sp, *J* = 6.8 Hz, CH, 2 H), 3.38 (d, *J* = 5.0 Hz, NH, 1 H), 2.85 (m, CH, 1 H), 2.66/2.58 (dd+dd, *J* = 13.1, 5.0 Hz, *J* = 13.1 Hz, *J* = 5.0 Hz, CH<sub>2</sub>, 2 H), 1.20 (brs, NH<sub>2</sub>, 2 H), 1.16 (d, *J* = 6.8 Hz, CH<sub>3</sub>, 6 H), 1.15 (d, *J* = 6.8 Hz, CH<sub>3</sub>, 6 H), 0.99 (s, CH<sub>3</sub>, 9 H). <sup>13</sup>C NMR (125 MHz, DMSO-*d*<sub>6</sub>) δ 142.7, 140.0, 123.4, 121.6, 69.3, 42.8, 35.3, 27.4, 26.9, 24.1, 24.0. HRMS

calcd for C<sub>18</sub>H<sub>33</sub>N<sub>2</sub> [M + H]<sup>+</sup> 277.2638, found 277.2628.

**(2*R*)-*N*-(2,6-di(propan-2-yl)phenyl)-3,3-dimethylbutane-1,2-diamine [(*R*)-19b]**

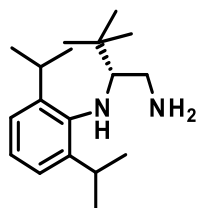

(*R*)-**19b** was prepared by following published procedures.<sup>1</sup>

***N*-(2,6-di(propan-2-yl)phenyl)ethane-1,2-diamine (**19c**)**

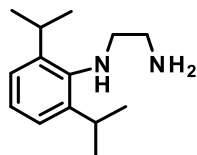

**19c** was prepared by following published procedures.<sup>2</sup>

**1.4 General Procedure for Preparation of Substituted Diamine Derivatives (20a-z)**

**Method A (20a-t,w-x)**

Example for Compound **20a-b**:

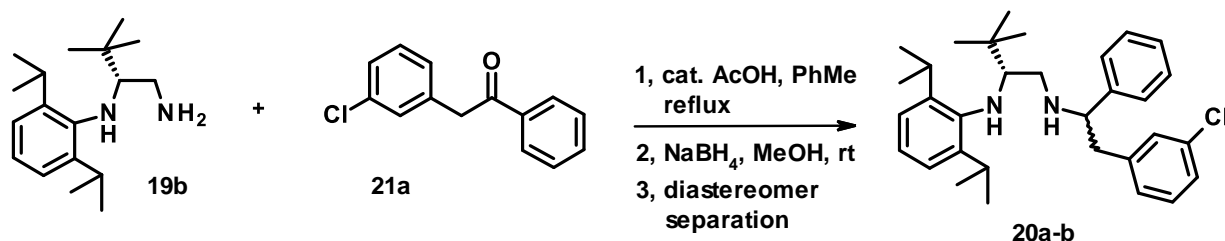

3.23 g **21a** (14.0 mmol) was dissolved in 70 mL toluene (5 mL/mmol) under inert atmosphere, then 3.87 g (*R*)-**19b** (14.0 mmol) was added in one portion and 74  $\mu$ L acetic acid (1.40 mmol) was also added. The mixture was stirred at 120°C. The reaction mixture was stirred for 4h, until all the **21a** was reacted, as monitored by GC-MS. When the starting material was reacted, the mixture was allowed to cool down at room temperature and the volatiles were removed under reduced pressure. The resulting Schiff-base was dissolved in 140 mL MeOH (10 mL/mmol) and 2.12 g NaBH<sub>4</sub> (55.9 mmol) was added carefully. The mixture was stirred for 16 h at room temperature, and monitored by LC-MS. The reaction mixture was quenched with the addition of saturated aqueous NH<sub>4</sub>Cl solution, and then it was extracted with EtOAc. The combined organic layers were dried over MgSO<sub>4</sub>. The volatiles were removed under reduced pressure and the residue was purified via flash column chromatography using a mixture of heptane and EtOAc as eluents. (2*R*,1'*R*)-**20a** and (2*R*,1'*S*)-**20b** were collected as a diastereomeric mixture (2.80 g, 5.67 mmol, 40.6%). Diastereomers were separated by column chromatography using a mixture of heptane and EtOAc as eluents.

**(2*R*)-*N*<sup>1</sup>-[(1*R*)-2-(3-chlorophenyl)-1-phenylethyl]-*N*<sup>2</sup>-(2,6-di(propan-2-yl)phenyl)-3,3-dimethylbutane-1,2-diamine [(2*R*,1'*R*)-**20a**] and (2*R*)-*N*<sup>1</sup>-[(1*S*)-2-(3-chlorophenyl)-1-phenylethyl]-*N*<sup>2</sup>-(2,6-di(propan-2-yl)phenyl)-3,3-dimethylbutane-1,2-diamine [(2*R*,1'*S*)-**20b**]**

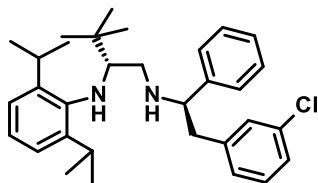

(2*R*,1'*R*)-**20a** was obtained as a single diastereomer, eluted first, and collected as yellow oil (1.13 g, 2.29 mmol, 16.4%). <sup>1</sup>H NMR (500 MHz, DMSO-*d*<sub>6</sub>) δ 7.18 (m, Ar-H, 1 H), 7.17 (m, Ar-H, 2 H), 7.13 (m, Ar-H, 1 H), 7.00 (m, Ar-H, 1 H), 6.99 (m, Ar-H, 2 H), 6.98 (s, Ar-H, 1 H), 6.94 (m, Ar-H, 2 H), 6.93 (m, Ar-H, 1 H), 6.85 (m, Ar-H, 1 H), 3.39 (dd, *J* = 7.5, 6.3 Hz, CH, 1 H), 3.19 (sp, *J* = 6.7 Hz, CH, 2 H), 3.08 (d, *J* = 11.6 Hz, NH, 1 H), 2.78 (m, CH, 1 H), 2.62/2.58 (m+m, CH<sub>2</sub>, 2 H), 2.45/2.14 (dd+dd, *J* = 11.6, 4.6 Hz, *J* = 11.6, 4.6 Hz, CH<sub>2</sub>, 2 H), 1.44 (brs, NH, 1 H), 1.12 (d, *J* = 6.7 Hz, CH<sub>3</sub>, 6 H), 1.02 (d, *J* = 6.7 Hz, CH<sub>3</sub>, 6 H), 0.85 (s, CH<sub>3</sub>, 9 H). <sup>13</sup>C NMR (125 MHz, DMSO-*d*<sub>6</sub>) δ 143.7, 141.9, 141.3, 140.5, 132.6, 129.7, 128.9, 127.9, 127.8, 127.0, 126.6, 126.0, 123.4, 122.2, 67.2, 63.5, 47.4, 43.8, 35.2, 35.1, 27.0, 26.9, 24.0, 23.8. HRMS calcd for C<sub>32</sub>H<sub>44</sub>ClN<sub>2</sub> [M + H]<sup>+</sup> 491.3187, found 491.3167.

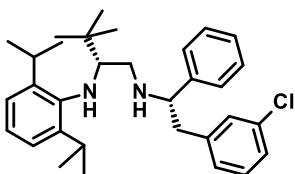

(2*R*,1'*S*)-**20b** was found a single diastereomer, eluted second, and collected as yellow oil (1.62 g, 3.30 mmol, 23.6%). <sup>1</sup>H NMR (400 MHz, DMSO-*d*<sub>6</sub>) δ 7.16 (m, Ar-H, 1 H), 7.16 (m, Ar-H, 1 H), 7.14 (m, Ar-H, 2 H), 7.12 (m, Ar-H, 1 H), 6.99 (d, *J* = 7.7 Hz, Ar-H, 2 H), 6.99 (s, Ar-H, 1 H), 6.96 (d, *J* = 8.0 Hz, Ar-H, 2 H), 6.90 (t, *J* = 7.7 Hz, Ar-H, 1 H), 6.85 (m, Ar-H, 1 H), 3.55 (t, *J* = 6.8 Hz, CH, 1 H), 3.24 (sp, *J* = 6.8 Hz, CH, 2 H), 3.22 (d, *J* = 11.6 Hz, NH, 1 H), 2.92 (m, CH, 1 H), 2.64/2.58 (dd+dd, *J* = 13.2, 6.8 Hz, *J* = 13.2, 6.8 Hz, CH<sub>2</sub>, 2 H), 2.35 (m, CH<sub>2</sub>, 2 H), 1.38 (brs, NH, 1 H), 1.13 (d, *J* = 6.8 Hz, CH<sub>3</sub>, 6 H), 1.07 (d, *J* = 6.8 Hz, CH<sub>3</sub>, 6 H), 0.89 (s, CH<sub>3</sub>, 9 H). <sup>13</sup>C NMR (100 MHz, DMSO-*d*<sub>6</sub>) δ 143.7, 141.9, 141.3, 140.5, 132.6, 129.7, 128.9, 127.9, 127.8, 127.0, 126.6, 126.0, 123.4, 122.2, 67.2, 63.5, 47.4, 43.8, 35.2, 35.1, 27.0, 26.9, 24.0, 23.8. HRMS calcd for C<sub>32</sub>H<sub>44</sub>ClN<sub>2</sub> [M + H]<sup>+</sup> 491.3187, found 491.3175.

**(2*R*)-*N*<sup>2</sup>-(2,6-di(propan-2-yl)phenyl)-3,3-dimethyl-*N*<sup>1</sup>-[(1'*R*)-2-phenyl-1-[3-(trifluoromethyl)phenyl]ethyl]butane-1,2-diamine [(2*R*,1'*R*)-**20c**] and (2*R*)-*N*<sup>2</sup>-(2,6-di(propan-2-yl)phenyl)-3,3-dimethyl-*N*<sup>1</sup>-[(1'*S*)-2-phenyl-1-[3-(trifluoromethyl)phenyl]ethyl]butane-1,2-diamine [(2*R*,1'*S*)-**20d**]**

By following the synthetic procedure described for (2*R*,1'*R*)-**20a** and (2*R*,1'*S*)-**20b**, the reaction was performed with 2.92 g **21b** (11.0 mmol) and 3.05 g (*R*)-**19b** (11.0 mmol). The reaction time of the first step was 4 h and that of the second step was 16 h. (2*R*,1'*R*)-**20c** and (2*R*,1'*S*)-**20d** were collected as a diastereomeric mixture (1490 mg, 2.83 mmol, 25.8%). Diastereomers were separated by column chromatography using a mixture of heptane and DCM as eluents.

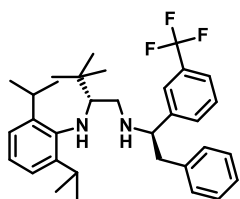

(2*R*,1'*R*)-**20c** was obtained as a single diastereomer, eluted first, and collected as yellow oil (815 mg, 1.55 mmol, 14.1%). <sup>1</sup>H NMR (500 MHz, DMSO-*d*<sub>6</sub>) δ 7.49 (d, *J* = 7.8 Hz, Ar-H, 1 H), 7.39 (t, *J* = 7.8 Hz, Ar-H, 1 H), 7.35 (s, Ar-H, 1 H), 7.22-6.86 (m, Ar-H, 5 H), 7.20 (d, *J* = 7.8 Hz, Ar-H, 1 H), 6.98 (d, *J* = 7.4 Hz, Ar-H, 2 H), 6.92 (m, Ar-H, 1 H), 3.54 (t, *J* = 6.0 Hz, CH, 1 H), 3.22 (sp, *J* = 6.7 Hz, CH, 2 H), 3.10 (d, *J* = 11.6 Hz, NH, 1 H), 2.80 (m, CH, 1 H), 2.63/2.57 (dd+dd, *J* = 13.3, 6.0 Hz, *J* = 13.3, 6.0 Hz, CH<sub>2</sub>, 2 H), 2.44/2.17 (m+m, CH<sub>2</sub>, 2 H), 1.55 (brs, NH, 1 H), 1.14 (d, *J* = 6.7 Hz, CH<sub>3</sub>, 6 H), 1.01 (d, *J* = 6.7 Hz, CH<sub>3</sub>, 6 H), 0.82 (s, CH<sub>3</sub>, 9 H). <sup>13</sup>C NMR (125 MHz, DMSO-*d*<sub>6</sub>) δ 145.6, 142.0, 140.5, 138.0, 131.4, 129.1, 128.8, 128.0, 126.2, 123.4, 122.2, 67.3, 63.2, 47.5, 44.4, 35.1, 27.0, 26.8, 24.0, 23.7. HRMS calcd for C<sub>33</sub>H<sub>44</sub>F<sub>3</sub>N<sub>2</sub> [M + H]<sup>+</sup> 525.3451, found 525.3454.

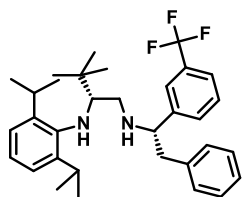

(2*R*,1'*S*)-**20d** was found a single diastereomer, eluted second, and collected as yellow oil (660 mg, 1.26 mmol, 11.4%). <sup>1</sup>H NMR (500 MHz, DMSO-*d*<sub>6</sub>) δ 7.44 (dm, *J* = 7.7 Hz, Ar-H, 1 H), 7.32 (m, Ar-H, 1 H), 7.31 (t, *J* = 7.7 Hz, Ar-H, 1 H), 7.21–6.89 (m, A-H, 5 H), 7.21 (dm, *J* = 7.7 Hz, Ar-H, 1 H), 6.95 (d, *J* = 7.5 Hz, Ar-H, 2 H), 6.87 (t, *J* = 7.5 Hz, Ar-H, 1 H), 3.69 (m, CH, 1 H), 3.22 (sp, *J* = 6.7 Hz, CH, 2 H), 3.17 (d, *J* = 11.5 Hz, NH, 1 H), 2.88 (m, CH, 1 H), 2.67/2.63 (dd+dd, *J* = 13.2, 8.6 Hz, *J* = 13.2, 7.4 Hz, CH<sub>2</sub>, 2 H), 2.36/2.27 (m+m, CH<sub>2</sub>, 2 H), 1.50 (brs, NH, 1 H), 1.13 (d, *J* = 6.7 Hz, CH<sub>3</sub>, 6 H), 1.04 (d, *J* = 6.7 Hz, CH<sub>3</sub>, 6 H), 0.88 (s, CH<sub>3</sub>, 9 H). <sup>13</sup>C NMR (125 MHz, DMSO-*d*<sub>6</sub>) δ 145.0, 142.0, 140.3, 138.2, 130.9, 129.2, 128.9, 128.0, 126.0, 123.3, 122.1, 66.5, 63.7, 48.0, 43.9, 35.0, 26.9, 24.1, 23.7. HRMS calcd for C<sub>33</sub>H<sub>44</sub>F<sub>3</sub>N<sub>2</sub> [M + H]<sup>+</sup> 525.3451, found 525.3444.

(2*S*)-*N*<sup>2</sup>-(2,6-di(propan-2-yl)phenyl)-*N*<sup>1</sup>-[(1'*S*)-1-(2-methoxyphenyl)-2-phenylethyl]-3,3-dimethylbutane-1,2-diamine [(2*S*,1'*S*)-**20e**] and (2*S*)-*N*<sup>2</sup>-(2,6-di(propan-2-yl)phenyl)-*N*<sup>1</sup>-[(1'*R*)-1-(2-methoxyphenyl)-2-phenylethyl]-3,3-dimethylbutane-1,2-diamine [(2*S*,1'*R*)-**20f**]

By following the synthetic procedure described for (2*R*,1'*R*)-**20a** and (2*R*,1'*S*)-**20b**, the reaction was performed with 930 mg **21c** (4.11 mmol) and 1.13 g (*S*)-**19a** (4.11 mmol). The reaction time of the first step was 5 h and that of the second was 16 h. (2*S*,1'*S*)-**20e** and (2*S*,1'*R*)-**20f** were collected as a diastereomeric mixture (1.26 g, 2.59 mmol, 63.0%). Diastereomers were separated by column chromatography using a mixture of heptane and DCM as eluents.

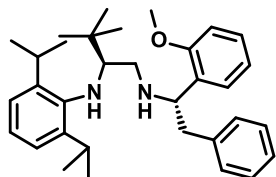

(2*S*,1'*S*)-**20e** was obtained as a single diastereomer, eluted first, and collected as yellow oil (760 mg, 1.56 mmol, 38.0%). <sup>1</sup>H NMR (500 MHz, DMSO-*d*<sub>6</sub>) δ 7.20–6.84 (m, Ar-H, 5 H), 7.10 (m, Ar-H, 1 H), 7.00 (d, *J* = 7.5 Hz, Ar-H, 2 H), 6.90 (m, Ar-H, 1 H), 6.88 (m, Ar-H, 1 H), 6.84 (m, Ar-H, 1 H), 6.80 (t, *J* = 7.5 Hz, Ar-H, 1 H), 3.90 (m, CH, 1 H), 3.68 (s, CH<sub>3</sub>, 3 H), 3.25 (sp, *J* = 6.7 Hz, CH, 2 H), 3.14 (d, *J* = 11.4 Hz, NH, 1 H), 2.88 (m, CH, 1 H), 2.67/2.45 (dd+m, *J* = 13.3, 4.7 Hz, CH<sub>2</sub>, 2 H), 2.48/2.20 (m+dd, *J* = 11.8, 4.6 Hz, CH<sub>2</sub>, 2 H), 1.37 (brs, NH, 1 H), 1.12 (d, *J* = 6.7 Hz, CH<sub>3</sub>, 6 H), 1.06 (d, *J* = 6.7 Hz, CH<sub>3</sub>, 6 H), 0.83 (s, CH<sub>3</sub>, 9 H). <sup>13</sup>C NMR (125 MHz, DMSO-*d*<sub>6</sub>) δ 156.8, 142.1, 140.0, 139.0, 131.2, 129.0, 127.9, 127.3, 126.7, 125.8, 123.4, 121.9, 120.0, 110.6, 67.2, 57.5, 55.2, 48.3, 42.6, 35.2, 27.0, 27.0, 24, 23.8. HRMS calcd for C<sub>33</sub>H<sub>47</sub>N<sub>2</sub>O [M + H]<sup>+</sup> 487.3683, found 487.3685.

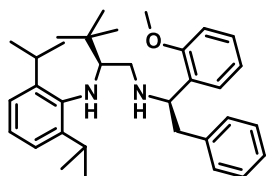

(2*S*,1'*R*)-**20f** was found a single diastereomer, eluted second, and collected as yellow oil (490 mg, 1.01 mmol, 24.5%). <sup>1</sup>H NMR (500 MHz, DMSO-*d*<sub>6</sub>) δ 7.20–6.86 (m, Ar-H, 5 H), 7.08 (td, *J* = 7.4, 1.5 Hz, Ar-H, 1 H), 7.00 (d, *J* = 7.6 Hz, Ar-H, 2 H), 6.90 (m, Ar-H, 1 H), 6.83 (dm, *J* = 7.4 Hz, Ar-H, 1 H), 6.81 (dd, *J* = 7.4, 1.5 Hz, Ar-H, 1 H), 6.68 (tm, *J* = 7.4 Hz, Ar-H, 1 H), 3.95 (m, CH, 1 H), 3.61 (s, CH<sub>3</sub>, 3 H), 3.27 (sp, *J* = 6.8 Hz, 2 H), 3.21 (d, *J* = 11.5 Hz, NH, 1 H), 2.90 (m, CH, 1 H), 2.71/2.53 (dd+dm, *J* = 13.3, 6.3 Hz, *J* = 6.3 Hz, CH<sub>2</sub>, 2 H), 2.33/2.23 (m+m, CH<sub>2</sub>, 2 H), 1.42 (brs, NH, 1 H), 1.14 (d, *J* = 6.8 Hz, CH<sub>3</sub>, 6 H), 1.07 (d, *J* = 6.8 Hz, CH<sub>3</sub>, 6 H), 0.88 (s, CH<sub>3</sub>, 9 H). <sup>13</sup>C NMR (125 MHz, DMSO-*d*<sub>6</sub>) δ 156.9, 142.4, 140.1, 139.2, 130.7, 129.1, 127.7, 127.3, 127.0, 125.7, 123.3, 121.8, 120.2, 110.6, 66.6, 55.2, 48.2, 43.1, 42.5, 42.0, 35.0, 27.1, 26.9, 24.0, 23.8. HRMS calcd for C<sub>33</sub>H<sub>47</sub>N<sub>2</sub>O [M + H]<sup>+</sup> 487.3683, found 487.3684.

(2*S*)-*N*<sup>2</sup>-(2,6-di(propan-2-yl)phenyl)-*N*<sup>1</sup>-[(1'*S*)-1-(3-methoxyphenyl)-2-phenylethyl]-3,3-dimethylbutane-1,2-diamine [(2*S*,1'*S*)-**20g**] and (2*S*)-*N*<sup>2</sup>-(2,6-di(propan-2-yl)phenyl)-*N*<sup>1</sup>-

**[(1'*R*)-1-(3-methoxyphenyl)-2-phenylethyl]-3,3-dimethylbutane-1,2-diamine [(2*S*,1'*R*)-20h]**

By following the synthetic procedure described for (2*R*,1'*R*)-**20a** and (2*R*,1'*S*)-**20b**, the reaction was performed with 1.19 g **21d** (5.25 mmol) and 1.32 g (*S*)-**19a** (4.77 mmol). The reaction time of the first step was 3.5 h and that of the second was 16 h. (2*S*,1'*S*)-**20g** and (2*S*,1'*R*)-**20h** were collected as a diastereomeric mixture (1.04 g, 2.14 mmol, 44.8%). Diastereomers were separated by column chromatography using heptane and acetone as eluents.

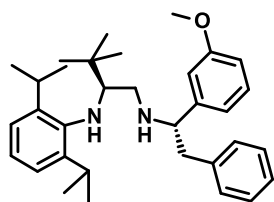

(2*S*,1'*S*)-**20g** was obtained as a single diastereomer, eluted first, and collected as yellow oil (373 mg, 0.766 mmol, 16.1%). <sup>1</sup>H NMR (400 MHz, DMSO-*d*<sub>6</sub>) 7.16 (m, Ar-H, 2 H), 7.13 (m, Ar-H, 1 H), 7.08 (t, *J* = 7.8 Hz, Ar-H, 1 H), 6.99 (d, *J* = 7.5 Hz, Ar-H, 2 H), 6.91 (dd, *J* = 7.5, 1.5 Hz, Ar-H, 1 H), 6.89 (m, Ar-H, 2 H), 6.70 (dd, *J* = 7.8, 2.5 Hz, Ar-H, 1 H), 6.66 (brs, Ar-H, 1 H), 6.55 (d, *J* = 7.8 Hz, Ar-H, 1 H), 3.66 (s, CH<sub>3</sub>, 3 H), 3.44 (dd, *J* = 7.8, 5.6 Hz, CH, 1 H), 3.24 (sp, *J* = 6.7 Hz, CH, 2 H), 3.12 (d, *J* = 11.5 Hz, NH, 1 H), 2.84 (sp, *J* = 6.7 Hz, CH, 1 H), 2.62/2.53 (dd+dd, *J* = 13.2, 6.6 Hz, *J* = 13.2, 7.8 Hz, CH<sub>2</sub>, 2 H), 2.47/2.19 (br+dd, *J* = 12.2, 5.0 Hz, CH<sub>2</sub>, 2 H), 1.39 (brs, NH, 1 H), 1.14 (d, *J* = 6.7 Hz, CH<sub>3</sub>, 6 H), 1.05 (d, *J* = 6.7 Hz, CH<sub>3</sub>, 6 H), 0.93 (s, CH<sub>3</sub>, 9 H). <sup>13</sup>C NMR (100 MHz, DMSO-*d*<sub>6</sub>) δ 159.1, 145.8, 142.1, 140.2, 138.5, 129.0, 128.8, 128.0, 126.0, 123.4, 122.1, 119.4, 112.2, 112.1, 67.3, 64.0, 54.8, 48.0, 44.6, 27.0, 26.9, 24.0, 23.8. HRMS calcd for C<sub>33</sub>H<sub>47</sub>N<sub>2</sub>O [M + H]<sup>+</sup> 487.3683, found 487.3688.

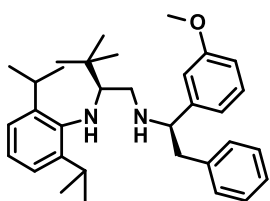

(2*S*,1'*R*)-**20h** was obtained as a single diastereomer, eluted second, and collected as yellow oil (498 mg, 1.02 mmol, 21.4%). <sup>1</sup>H NMR (400 MHz, DMSO-*d*<sub>6</sub>) 7.16 (m, Ar-H, 2 H), 7.10 (m, Ar-H, 1 H), 7.03 (t, *J* = 7.8 Hz, Ar-H, 1 H), 6.99 (d, *J* = 7.5 Hz, Ar-H, 2 H), 6.93 (m, Ar-H, 2 H), 6.89 (dd, *J* = 8.3, 7.1 Hz, Ar-H, 1 H), 6.66 (dd, *J* = 7.8, 2.3 Hz, Ar-H, 1 H), 6.59 (brs, Ar-H, 1 H), 6.53 (d, *J* = 7.8 Hz, Ar-H, 1 H), 3.61 (s, CH<sub>3</sub>, 3 H), 3.54 (t, *J* = 6.8 Hz, CH, 1 H), 3.26 (sp, *J* = 6.7 Hz, CH, 2 H), 3.21 (d, *J* = 11.1 Hz, NH, 1 H), 2.91 (m, CH, 1 H), 2.66/2.58 (dd+dd, *J* = 13.1, 6.8 Hz, *J* = 13.1, 6.8 Hz, CH<sub>2</sub>, 2 H), 2.34 (m, CH<sub>2</sub>, 2 H), 1.39 (brs, NH, 1 H), 1.13 (d, *J* = 6.7 Hz, CH<sub>3</sub>, 6 H), 1.08 (d, *J* = 6.7 Hz, CH<sub>3</sub>, 6 H), 0.88 (s, CH<sub>3</sub>, 9 H). <sup>13</sup>C NMR (100 MHz, DMSO-*d*<sub>6</sub>) δ 159.0, 145.2, 142.4, 140.0, 138.8, 129.2, 128.8, 127.9, 125.9, 123.3, 121.9, 119.2, 112.2, 112.1, 66.3, 64.1, 54.7, 48.3, 44.1, 27.1, 27.0, 24.1, 23.8. HRMS calcd for C<sub>33</sub>H<sub>47</sub>N<sub>2</sub>O [M + H]<sup>+</sup> 487.3683, found 487.3682.

**(2*S*)-*N*<sup>2</sup>-(2,6-di(propan-2-yl)phenyl)-*N*<sup>1</sup>-[(1'*R*)-1-(4-methoxyphenyl)-2-phenylethyl]-3,3-dimethylbutane-1,2-diamine [(2*S*,1'*R*)-20i] and (2*S*)-*N*<sup>2</sup>-(2,6-di(propan-2-yl)phenyl)-*N*<sup>1</sup>-[(1'*S*)-1-(4-methoxyphenyl)-2-phenylethyl]-3,3-dimethylbutane-1,2-diamine [(2*S*,1'*S*)-20j]**

By following the synthetic procedure described for (2*R*,1'*R*)-**20a** and (2*R*,1'*S*)-**20b**, the reaction was performed with 2.00 g **21e** (8.84 mmol) and 2.44 g (*S*)-**19a** (8.84 mmol). Reaction time of the first step was 5 h and that of the second was 16 h. (2*S*,1'*R*)-**20i** and (2*S*,1'*S*)-**20j** were collected as a diastereoisomeric mixture (2.34 g, 4.81 mmol, 54.4%). Diastereomers were separated by preparative chiral HPLC, on OD-I (50×500 mm, 20 μm, Flow rate: 50 mL/min) column.

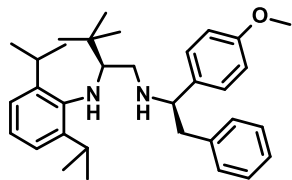

By chiral HPLC analysis, (2*S*,1'*R*)-**20i** was found a single enantiomer and eluted first on the Chiralcel OD-I column using MTBE/heptane (2:98) and 0.1% diethylamine as eluents ( $t_R$  = 14.75 min). (2*S*,1'*R*)-**20i** was collected as yellow oil (1.34 g, 2.76 mmol, 31.2%).  $^1\text{H}$  NMR (500 MHz, DMSO- $d_6$ )  $\delta$  7.18-6.85 (m, Ar-H, 5 H), 7.00 (d,  $J$  = 7.6 Hz, Ar-H, 2 H), 6.91 (t,  $J$  = 7.6 Hz, Ar-H, 1 H), 6.86 (d,  $J$  = 8.6 Hz, Ar-H, 2 H), 6.67 (d,  $J$  = 8.6 Hz, Ar-H, 2 H), 3.68 (s, CH<sub>3</sub>, 3 H), 3.50 (t,  $J$  = 6.7 Hz, CH, 1 H), 3.25 (sp,  $J$  = 6.7 Hz, CH, 2 H), 3.21 (d,  $J$  = 11.5 Hz, NH, 1 H), 2.91 (m, CH, 1 H), 2.60/2.53 (dd+dd,  $J$  = 13.0, 6.7 Hz,  $J$  = 13.0, 6.7 Hz, CH<sub>2</sub>, 2 H), 2.33 (m, CH<sub>2</sub>, 2 H), 1.28 (brs, NH, 1 H), 1.14 (d,  $J$  = 6.7 Hz, CH<sub>3</sub>, 6 H), 1.08 (d,  $J$  = 6.7 Hz, CH<sub>3</sub>, 6 H), 0.88 (s, CH<sub>3</sub>, 9 H).  $^{13}\text{C}$  NMR (125 MHz, DMSO- $d_6$ )  $\delta$  157.8, 142.4, 140.1, 138.8, 135.1, 129.2, 127.9, 127.9, 125.8, 123.4, 121.9, 113.3, 66.3, 63.2, 54.9, 48.2, 44.3, 35.0, 27.0, 27.0, 24.1, 23.8. HRMS calcd for C<sub>33</sub>H<sub>47</sub>N<sub>2</sub>O [M + H]<sup>+</sup> 487.3683, found 487.3685.

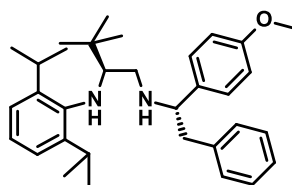

By chiral HPLC analysis, (2*S*,1'*S*)-**20j** was found a single enantiomer and eluted second on the OD-I column using MTBE/heptane (2:98) and 0.1% diethylamine as eluents ( $t_R$  = 21.19 min). (2*S*,1'*S*)-**20j** was collected as yellow oil (974 mg, 2.00 mmol, 22.6%).  $^1\text{H}$  NMR (500 MHz, DMSO- $d_6$ )  $\delta$  7.20-6.84 (m, Ar-H, 5 H), 7.00 (d,  $J$  = 7.2 Hz, Ar-H, 2 H), 6.94 (m, Ar-H, 1 H), 6.87 (d,  $J$  = 8.6 Hz, Ar-H, 2 H), 6.72 (d,  $J$  = 8.6 Hz, Ar-H, 2 H), 3.69 (s, CH<sub>3</sub>, 3 H), 3.38 (t,  $J$  = 6.7 Hz, CH, 1 H), 3.23 (sp,  $J$  = 6.7 Hz, 2 H), 3.10 (d,  $J$  = 11.7 Hz, NH, 1 H), 2.81 (m, CH, 1 H), 2.58/2.53 (dd+dm,  $J$  = 13.5, 5.8 Hz,  $J$  = 7.6 Hz, CH<sub>2</sub>, 2 H), 2.45/2.16 (m+m, CH<sub>2</sub>, 2 H), 1.34 (brs, NH, 1 H), 1.14 (d,  $J$  = 6.7 Hz, CH<sub>3</sub>, 6 H), 1.05 (d,  $J$  = 6.7 Hz, CH<sub>3</sub>, 6 H), 0.83 (s, CH<sub>3</sub>, 9 H).  $^{13}\text{C}$  NMR (125 MHz, DMSO- $d_6$ )  $\delta$  157.9, 142.1, 140.3, 138.7, 135.8, 129.0, 128.0, 128.0, 125.9, 123.5, 122.1, 113.2, 67.1, 63.3, 54.9, 47.7, 44.6, 35.2, 27.0, 26.9, 24.0, 23.8. HRMS calcd for C<sub>33</sub>H<sub>47</sub>N<sub>2</sub>O [M + H]<sup>+</sup> 487.3683, found 487.3686.

**(2*S*)-*N*<sup>2</sup>-(2,6-di(propan-2-yl)phenyl)-3,3-dimethyl-*N*<sup>1</sup>-[(1'*S*)-1-(*o*-tolyl)-2-phenylethyl]butane-1,2-diamine [(2*S*,1'*S*)-**20k**] and (2*S*)-*N*<sup>2</sup>-(2,6-di(propan-2-yl)phenyl)-3,3-dimethyl-*N*<sup>1</sup>-[(1'*R*)-1-(*o*-tolyl)-2-phenylethyl]butane-1,2-diamine [(2*S*,1'*R*)-**20l**]**

By following the synthetic procedure described for (2*R*,1'*R*)-**20a** and (2*R*,1'*S*)-**20b**, the reaction was performed with 783 mg **21f** (3.72 mmol) and 1.03 g (*S*)-**19a** (3.72 mmol). The reaction time of the first step was 4 h and that of the second was 16 h. (2*S*,1'*S*)-**20k** and (2*S*,1'*R*)-**20l** were collected as a diastereomeric mixture (590 mg, 1.25 mmol, 33.6%). Diastereomers were separated by column chromatography using a mixture of heptane and EtOAc as eluents.

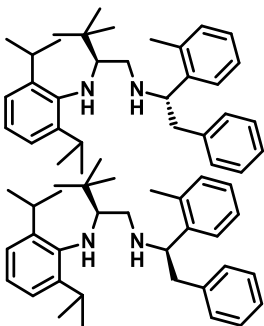

(2*S*,1'*S*)-**20k** was obtained a single diastereomer, eluted first, and collected as yellow oil (195 mg, 0.414 mmol, 11.1%). The product was decomposed during the structure measurements.

(2*S*,1'*R*)-**20l** was obtained as a single diastereomer, eluted second, and collected as yellow oil (236 mg, 0.501 mmol, 13.5%).  $^1\text{H}$  NMR (500 MHz, DMSO- $d_6$ )  $\delta$  7.20-6.84 (m, Ar-H, 9 H), 7.00 (d,  $J$  = 7.5 Hz, Ar-H, 2 H), 6.90 (d,  $J$  = 7.5 Hz, Ar-H, 1 H), 3.83 (t,  $J$  = 6.6 Hz, CH, 1 H), 3.25 (sp,  $J$  = 6.7 Hz, CH, 2 H), 3.22 (d,  $J$  = 11.5 Hz, NH, 1 H), 2.90 (m, CH, 1 H), 2.62/2.53 (dd+dd,  $J$  = 13.1, 6.6 Hz,  $J$  = 13.1, 6.6 Hz, CH<sub>2</sub>, 2 H), 2.35/2.27 (m+m, CH<sub>2</sub>, 2 H), 1.96 (s, CH<sub>3</sub>, 3 H), 1.37 (brs, NH, 1 H), 1.14 (d,  $J$  = 6.7 Hz, CH<sub>3</sub>, 6 H), 1.08 (d,  $J$  = 6.7 Hz, CH<sub>3</sub>, 6 H), 0.87 (s, CH<sub>3</sub>, 9 H).  $^{13}\text{C}$  NMR (125 MHz, DMSO- $d_6$ )  $\delta$  142.4, 141.3, 140.0, 138.7, 135.2, 129.7, 129.2, 127.9, 126.0, 125.9, 125.9, 125.6, 123.4,

121.9, 66.5, 59.3, 48.1, 43.5, 27.0, 27.0, 24.0, 23.8, 18.7. HRMS calcd for C<sub>33</sub>H<sub>47</sub>N<sub>2</sub> [M + H]<sup>+</sup> 471.3734, found 471.3739.

**(2*S*)-*N*<sup>2</sup>-(2,6-di(propan-2-yl)phenyl)-3,3-dimethyl-*N*<sup>1</sup>-[(1'*R*)-2-phenyl-1-(*p*-tolyl)ethyl]butane-1,2-diamine [(2*S*,1'*R*)-20m] and (2*S*)-*N*<sup>2</sup>-(2,6-di(propan-2-yl)phenyl)-3,3-dimethyl-*N*<sup>1</sup>-[(1'*S*)-2-phenyl-1-(*p*-tolyl)ethyl]butane-1,2-diamine [(2*S*,1'*S*)-20n]**

By following the synthetic procedure described for (2*R*,1'*R*)-20a and (2*R*,1'*S*)-20b, the reaction was performed with 956 mg **21g** (4.55 mmol) and 1.26 g (*S*)-19a (4.55 mmol). The reaction time of the first step was 4 h and that of the second was 16 h. (2*S*,1'*R*)-20m and (2*S*,1'*S*)-20n were collected as a diastereomeric mixture (1.11 g, 2.36 mmol, 52.0%). Diastereomers were separated by chiral preparative chromatography, on OD (50×500 mm, 20 μm, Flow rate: 50 mL/min) column.

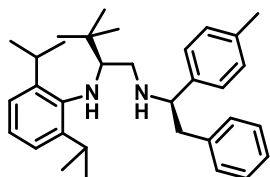

By chiral HPLC analysis, (2*S*,1'*R*)-20m was found to be a single enantiomer and eluted first on the OD column using heptane and 0.1% diethylamine as eluents (*t<sub>R</sub>* = 6.45 min). (2*S*,1'*R*)-20m was collected as yellow oil (438 mg, 0.931 mmol, 20.5%). <sup>1</sup>H NMR (500 MHz, DMSO-*d*<sub>6</sub>) δ 7.20-6.85 (m, Ar-H, 5 H), 7.00 (d, *J* = 7.5 Hz, Ar-H, 2 H), 6.92 (m, Ar-H, 2 H), 6.91 (m, Ar-H, 1 H), 6.84 (d, *J* = 8.0 Hz, Ar-H, 2 H), 3.52 (m, 1 H), 3.25 (sp, *J* = 6.7 Hz, CH, 2 H), 3.21 (d, *J* = 11.5 Hz, NH, 1 H), 2.91 (m, CH, 1 H), 2.62/2.56 (dd+dd, *J* = 13.6, 7.1 Hz, *J* = 12.9, 7.1 Hz, CH<sub>2</sub>, 2 H), 2.32 (m, CH<sub>2</sub>, 2 H), 2.21 (s, CH<sub>3</sub>, 3 H), 1.32 (brs, NH, 1 H), 1.14 (d, *J* = 6.7 Hz, CH<sub>3</sub>, 6 H), 1.08 (d, *J* = 6.7 Hz, CH<sub>3</sub>, 6 H), 0.87 (s, CH<sub>3</sub>, 9 H). <sup>13</sup>C NMR (125 MHz, DMSO-*d*<sub>6</sub>) δ 142.5, 140.3, 140.0, 138.8, 135.3, 129.2, 128.5, 127.9, 126.8, 125.8, 123.4, 121.8, 66.4, 63.6, 48.2, 44.2, 35.1, 27.1, 27.0, 24.1, 23.8, 20.7. HRMS calcd for C<sub>33</sub>H<sub>47</sub>N<sub>2</sub> [M + H]<sup>+</sup> 471.3734, found 471.3736.

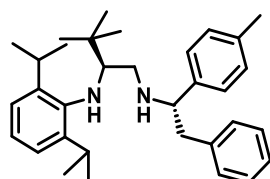

By chiral HPLC analysis, (2*S*,1'*S*)-20n was found to be a single enantiomer and eluted second on the OD column using heptane with 0.1% diethylamine as eluents (*t<sub>R</sub>* = 8.30 min). (2*S*,1'*S*)-20n was collected as yellow oil (319 mg, 0.678 mmol, 14.9%). <sup>1</sup>H NMR (500 MHz, DMSO-*d*<sub>6</sub>) δ 7.20-6.84 (m, Ar-H, 5 H), 7.00 (d, *J* = 7.4 Hz, Ar-H, 2 H), 6.98 (d, *J* = 8.1 Hz, Ar-H, 2 H), 6.93 (dm, *J* = 7.4 Hz, Ar-H, 1 H), 6.86 (d, *J* = 8.1 Hz, Ar-H, 2 H), 3.41 (m, CH, 1 H), 3.23 (sp, *J* = 6.7 Hz, CH, 2 H), 3.11 (d, *J* = 11.4 Hz, NH, 1 H), 2.82 (m, CH, 1 H), 2.60/2.53 (dd+dd, *J* = 13.4, 5.4 Hz, *J* = 13.4, 5.4 Hz, CH<sub>2</sub>, 2 H), 2.44/2.17 (m+dd, *J* = 12.2, 4.4 Hz, CH<sub>2</sub>, 2 H), 2.23 (s, CH<sub>3</sub>, 3 H), 1.35 (brs, NH, 1 H), 1.13 (d, *J* = 6.7 Hz, CH<sub>3</sub>, 6 H), 1.05 (d, *J* = 6.7 Hz, CH<sub>3</sub>, 6 H), 0.82 (s, CH<sub>3</sub>, 9 H). <sup>13</sup>C NMR (125 MHz, DMSO-*d*<sub>6</sub>) δ 142.1, 140.9, 140.3, 138.7, 135.4, 129.0, 128.5, 128.0, 126.9, 125.9, 123.4, 122.0, 67.2, 63.7, 47.9, 44.6, 35.2, 27.0, 26.9, 24.0, 23.8, 20.7. HRMS calcd for C<sub>33</sub>H<sub>47</sub>N<sub>2</sub> [M + H]<sup>+</sup> 471.3734, found 471.3736.

**(2*S*)-*N*<sup>2</sup>-(2,6-di(propan-2-yl)phenyl)-3,3-dimethyl-*N*<sup>1</sup>-[(1'*R*)-2-phenyl-1-[4-(trifluoromethyl)phenyl]ethyl]butane-1,2-diamine [(2*S*,1'*R*)-20o] and (2*S*)-*N*<sup>2</sup>-(2,6-di(propan-2-yl)phenyl)-3,3-dimethyl-*N*<sup>1</sup>-[(1'*S*)-2-phenyl-1-[4-(trifluoromethyl)phenyl]ethyl]butane-1,2-diamine [(2*S*,1'*S*)-20p]**

By following the synthetic procedure described for (2*R*,1'*R*)-20a and (2*R*,1'*S*)-20b, the reaction was performed with 2.50 g **21h** (9.46 mmol) and 2.62 g (*S*)-19a (9.46 mmol). The reaction time of the first step was 4 h and that of the second was 16 h. (2*S*,1'*R*)-20o and (2*S*,1'*S*)-20p were collected as a diastereomeric mixture (2.43 g, 4.63 mmol, 48.9%). Diastereomers were separated by chiral preparative chromatography, on OD (50×500mm, 20μm, Flow rate: 50 mL/min) column.



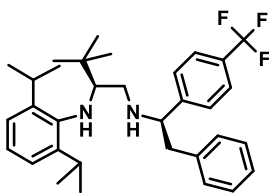

By chiral HPLC analysis, (2*S*,1'*R*)-**20o** was obtained as a single diastereoisomer and eluted first on the OD column using heptane and 0.1% diethylamine as eluents ( $t_R$  = 5.80 min). (2*S*,1'*R*)-**20o** was collected as yellow oil (1.36 g, 2.60 mmol, 27.4%).  $^1\text{H}$  NMR (500 MHz, DMSO- $d_6$ )  $\delta$  7.39 (d,  $J$  = 7.0 Hz, Ar-H, 2 H), 7.24-6.92 (m, Ar-H, 5 H), 7.10 (d,  $J$  = 7.0 Hz, Ar-H, 2 H), 6.95 (d,  $J$  = 6.6 Hz, Ar-H, 2 H), 6.91 (m, Ar-H, 1 H), 3.69 (t,  $J$  = 6.6 Hz, CH, 1 H), 3.16 (sp,  $J$  = 6.7 Hz, CH, 2 H), 3.11 (d,  $J$  = 11.5 Hz, NH, 1 H), 2.85 (m, CH, 1 H), 2.68/2.60 (dd+dd,  $J$  = 13.3, 6.6 Hz,  $J$  = 13.3, 7.6 Hz, CH<sub>2</sub>, 2 H), 2.31/2.18 (m+m, CH<sub>2</sub>, 2 H), 1.43 (brs, NH, 1 H), 1.14 (d,  $J$  = 6.7 Hz, CH<sub>3</sub>, 6 H), 0.99 (d,  $J$  = 6.7 Hz, CH<sub>3</sub>, 6 H), 0.89 (s, CH<sub>3</sub>, 9 H).  $^{13}\text{C}$  NMR (125 MHz, DMSO- $d_6$ )  $\delta$  148.4, 141.8, 140.7, 138.2, 129.1, 128.0, 127.5, 127.1, 126.1, 124.7, 124.7, 123.3, 122.3, 67.0, 63.6, 47.6, 44.0, 34.9, 26.9, 26.8, 24.1, 23.6. HRMS calcd for C<sub>33</sub>H<sub>44</sub>F<sub>3</sub>N<sub>2</sub> [M + H]<sup>+</sup> 525.3451, found 525.3452.

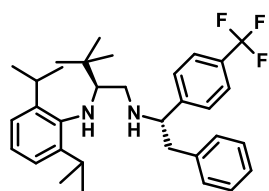

By chiral HPLC analysis, (2*S*,1'*S*)-**20p** was obtained as a single diastereoisomer and eluted second on the OD column using heptane and 0.1% diethylamine as eluents ( $t_R$  = 7.92 min). (2*S*,1'*S*)-**20p** was collected as yellow oil (1.06 g, 2.02 mmol, 21.3%).  $^1\text{H}$  NMR (500 MHz, DMSO- $d_6$ )  $\delta$  7.50 (d,  $J$  = 8.0 Hz, Ar-H, 2 H), 7.23-6.89 (m, Ar-H, 5 H), 7.10 (d,  $J$  = 8.0 Hz, Ar-H, 2 H), 6.99 (m, Ar-H, 2 H), 6.97 (m, Ar-H, 1 H), 3.51 (t,  $J$  = 6.6 Hz, CH, 1 H), 3.18 (sp,  $J$  = 6.7 Hz, CH, 2 H), 3.06 (d,  $J$  = 11.5 Hz, NH, 1 H), 2.76 (m, CH, 1 H), 2.64/2.60 (dd+dd,  $J$  = 13.4, 6.6 Hz,  $J$  = 13.4, 8.1 Hz, CH<sub>2</sub>, 2 H), 2.45/2.09 (m+dd,  $J$  = 11.6, 3.2 Hz, CH<sub>2</sub>, 2 H), 1.58 (brs, NH, 1 H), 1.14 (d,  $J$  = 6.7 Hz, CH<sub>3</sub>, 6 H), 0.99 (d,  $J$  = 6.7 Hz, CH<sub>3</sub>, 6 H), 0.83 (s, CH<sub>3</sub>, 9 H).  $^{13}\text{C}$  NMR (125 MHz, DMSO- $d_6$ )  $\delta$  149.0, 141.9, 140.7, 138.2, 129.1, 128.1, 127.8, 126.2, 124.7, 124.7, 123.5, 122.4, 67.0, 63.3, 47.1, 44.0, 35.1, 27.0, 26.8, 24.0, 23.7. HRMS calcd for C<sub>33</sub>H<sub>44</sub>F<sub>3</sub>N<sub>2</sub> [M + H]<sup>+</sup> 525.3451, found 525.3454.

**(2*S*)-*N*<sup>2</sup>-(2,6-di(propan-2-yl)phenyl)-3,3-dimethyl-*N*<sup>1</sup>-[(1'*S*)-1-phenyl-2-(p-tolyl)ethyl]butane-1,2-diamine [(2*S*,1'*S*)-**20q**] and (2*S*)-*N*<sup>2</sup>-(2,6-di(propan-2-yl)phenyl)-3,3-dimethyl-*N*<sup>1</sup>-[(1'*R*)-1-phenyl-2-(p-tolyl)ethyl]butane-1,2-diamine [(2*S*,1'*R*)-**20r**]**

By following the synthetic procedure described for (2*R*,1'*R*)-**20a** and (2*R*,1'*S*)-**20b**, the reaction was performed with 950 mg **21i** (4.52 mmol) and 1.25 g (*S*)-**19a** (4.52 mmol). The reaction time of the first step was 1 h and thst of the second was 16 h. (2*S*,1'*S*)-**20q** and (2*S*,1'*R*)-**20r** were collected as a diastereomeric mixture (323 mg, 0.687 mmol, 15.2%). Diastereoisomers were separated by column chromatography using a mixture of heptane and DCM as eluents.

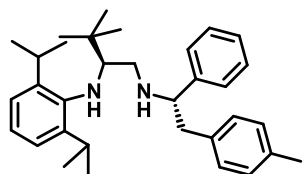

(2*S*,1'*S*)-**20q** was obtained as a single diastereoisomer, eluted first, and collected as yellow oil (198 mg, 0.421 mmol, 9.31%).  $^1\text{H}$  NMR (500 MHz, DMSO- $d_6$ )  $\delta$  7.18 (t,  $J$  = 7.1 Hz, Ar-H, 2 H), 7.13 (t,  $J$  = 7.1 Hz, Ar-H, 1 H), 7.00 (d,  $J$  = 7.1 Hz, Ar-H, 2 H), 7.00 (d,  $J$  = 7.0 Hz, Ar-H, 2 H), 6.99 (dd,  $J$  = 7.0, 1.2 Hz, Ar-H, 1 H), 6.96 (d,  $J$  = 7.8 Hz, Ar-H, 2 H), 6.77 (d,  $J$  = 7.8 Hz, Ar-H, 2 H), 3.42 (t,  $J$  = 6.8 Hz, CH, 1 H), 3.24 (sp,  $J$  = 6.7 Hz, CH, 2 H), 3.11 (d,  $J$  = 11.5 Hz, NH, 1 H), 2.84 (m, CH, 1 H), 2.59/2.51 (dd+m,  $J$  = 13.1, 5.5 Hz, CH<sub>2</sub>, 2 H), 2.45/2.18 (m+dd,  $J$  = 12.6, 5.5 Hz, CH<sub>2</sub>, 2 H), 2.22 (s, CH<sub>3</sub>, 3 H), 1.38 (brs, NH, 1 H), 1.15 (d,  $J$  = 6.7 Hz, CH<sub>3</sub>, 6 H), 1.05 (d,  $J$  = 6.7 Hz, CH<sub>3</sub>, 6 H), 0.83 (s, CH<sub>3</sub>, 9 H).  $^{13}\text{C}$  NMR (125 MHz, DMSO- $d_6$ )  $\delta$  144.1, 142.1, 140.3, 135.4, 134.8, 128.9, 128.6, 127.9, 127.0, 126.5, 123.4, 122.1, 67.2, 64.1, 47.9, 44.2, 35.2, 27.0, 26.9, 24.0, 23.8, 20.6. HRMS calcd for C<sub>33</sub>H<sub>47</sub>N<sub>2</sub> [M + H]<sup>+</sup> 471.3734, found 471.3739.

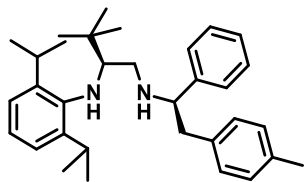

(2*S*,1'*R*)-**20r** was obtained as a single diastereoisomer, eluted second, and collected as yellow oil (115 mg, 0.245 mmol, 5.41%). <sup>1</sup>H NMR (400 MHz, DMSO-*d*<sub>6</sub>) δ 7.12 (m, Ar-H, 1 H), 7.12 (m, Ar-H, 2 H), 7.01 (d, *J* = 7.0 Hz, Ar-H, 2 H), 6.95 (d, *J* = 7.9 Hz, Ar-H, 2 H), 6.95 (d, *J* = 7.3 Hz, Ar-H, 2 H), 6.91 (dd, *J* = 8.2, 7.0 Hz, Ar-H, 1 H), 6.77 (d, *J* = 7.9 Hz, Ar-H, 2 H), 3.53 (q, *J* = 5.5 Hz, CH, 1 H), 3.26 (sp, *J* = 6.9 Hz, CH, 2 H), 3.22 (d, *J* = 11.7 Hz, NH, 1 H), 2.92 (dt, *J* = 11.7, 5.2 Hz, CH, 1 H), 2.60/2.51 (dd+m, *J* = 12.9, 7.1 Hz, CH<sub>2</sub>, 2 H), 2.35/2.33 (m+m, CH<sub>2</sub>, 2 H), 2.20 (s, CH<sub>3</sub>, 3 H), 1.34 (q, *J* = 5.5 Hz, NH, 1 H), 1.15 (d, *J* = 6.9 Hz, CH<sub>3</sub>, 6 H), 1.08 (d, *J* = 6.9 Hz, CH<sub>3</sub>, 6 H), 0.88 (s, CH<sub>3</sub>, 9 H). <sup>13</sup>C NMR (100 MHz, DMSO-*d*<sub>6</sub>) δ 143.4, 142.4, 140, 135.5, 134.7, 129.0, 128.5, 127.9, 126.9, 126.5, 123.4, 121.9, 66.3, 63.9, 48.3, 43.9, 35.0, 27.0, 27.0, 24.0, 23.8, 20.6. HRMS calcd for C<sub>33</sub>H<sub>47</sub>N<sub>2</sub> [M + H]<sup>+</sup> 471.3734, found 471.3739.

**(2*S*)-*N*<sup>1</sup>-[(1'*S*)-2-(4-chlorophenyl)-1-phenylethyl]-*N*<sup>2</sup>-(2,6-di(propan-2-yl)phenyl)-3,3-dimethylbutane-1,2-diamine [(2*S*,1'*S*)-**20s**] and (2*S*)-*N*<sup>1</sup>-[(1'*R*)-2-(4-chlorophenyl)-1-phenylethyl]-*N*<sup>2</sup>-(2,6-di(propan-2-yl)phenyl)-3,3-dimethylbutane-1,2-diamine [(2*S*,1'*R*)-**20t**]**

By following the synthetic procedure described for (2*R*,1'*R*)-**20a** and (2*R*,1'*S*)-**20b**, the reaction was performed with 890 mg **21j** (3.86 mmol) and 1.07 g (*S*)-**19a** (3.86 mmol). The reaction time of the first step was 1 h and that of the second was 16 h. (2*S*,1'*S*)-**20s** and (2*S*,1'*R*)-**20t** were collected as a diastereomeric mixture (545 mg, 1.11 mmol, 28.9%). Diastereomers were separated by column chromatography using a mixture of heptane and DCM as eluents.

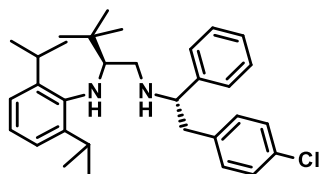

(2*S*,1'*S*)-**20s** was obtained as a single diastereomer, eluted first, and collected as yellow oil (255 mg, 0.519 mmol, 13.5%). <sup>1</sup>H NMR (500 MHz, DMSO-*d*<sub>6</sub>) δ 7.23-7.10 (m, Ar-H, 5 H), 6.99 (m, Ar-H, 2 H), 6.99 (m, Ar-H, 2 H), 6.93 (dd, *J* = 8.1, 6.7 Hz, Ar-H, 1 H), 6.87 (dm, *J* = 8.4 Hz, Ar-H, 2 H), 3.41 (dd, *J* = 7.7, 6.4 Hz, CH, 1 H), 3.21 (sp, *J* = 6.7 Hz, CH, 2 H), 3.11 (d, *J* = 12.4 Hz, NH, 1 H), 2.83 (m, CH, 1 H), 2.60/2.56 (dd+dd, *J* = 13.5, 6.4 Hz, *J* = 13.5, 7.7 Hz, CH<sub>2</sub>, 2 H), 2.45/2.17 (dm+dd, *J* = 12.4 Hz, *J* = 12.4, 5.0 Hz, CH<sub>2</sub>, 2 H), 1.37 (brs, NH, 1 H), 1.13 (d, *J* = 6.7 Hz, CH<sub>3</sub>, 6 H), 1.05 (d, *J* = 6.7 Hz, CH<sub>3</sub>, 6 H), 0.85 (s, CH<sub>3</sub>, 9 H). <sup>13</sup>C NMR (125 MHz, DMSO-*d*<sub>6</sub>) δ 143.7, 142.0, 140.4, 137.6, 130.9, 130.6, 127.9, 127.9, 127.0, 126.6, 123.4, 122.2, 67.3, 63.9, 48.0, 43.6, 35.1, 27.0, 26.9, 24.0, 23.8. HRMS calcd for C<sub>32</sub>H<sub>44</sub>ClN<sub>2</sub> [M + H]<sup>+</sup> 491.3187, found 491.3191.

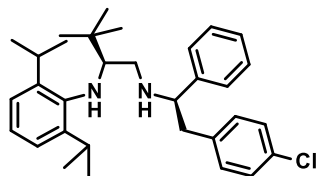

(2*S*,1'*R*)-**20t** was obtained as a single diastereomer, eluted second, and collected as yellow oil (281 mg, 0.572 mmol, 14.8%). <sup>1</sup>H NMR (500 MHz, DMSO-*d*<sub>6</sub>) δ 7.19 (dm, *J* = 8.4 Hz, Ar-H, 2 H), 7.16-6.92 (m, Ar-H, 5 H), 7.00 (d, *J* = 7.0 Hz, Ar-H, 2 H), 6.91 (m, Ar-H, 1 H), 6.89 (d, *J* = 8.4 Hz, Ar-H, 2 H), 3.54 (m, CH, 1 H), 3.25 (sp, *J* = 6.8 Hz, CH, 2 H), 3.22 (d, *J* = 11.5 Hz, NH, 1 H), 2.92 (m, CH, 1 H), 2.63/2.58 (dd+dd, *J* = 13.2, 7.0 Hz, *J* = 13.2, 7.0 Hz, CH<sub>2</sub>, 2 H), 2.35 (m, CH<sub>2</sub>, 2 H), 1.36 (brs, NH, 1 H), 1.14 (d, *J* = 6.7 Hz, CH<sub>3</sub>, 6 H), 1.08 (d, *J* = 6.7 Hz, CH<sub>3</sub>, 6 H), 0.89 (s, CH<sub>3</sub>, 9 H). <sup>13</sup>C NMR (125 MHz, DMSO-*d*<sub>6</sub>) δ 143.1, 142.5, 140.0, 137.8, 131.0, 130.5, 127.9, 127.7, 126.9, 126.6, 123.4, 121.9, 66.3, 63.7, 48.3, 43.3, 35.1, 27.1, 27, 24.0, 23.8. HRMS calcd for C<sub>32</sub>H<sub>44</sub>ClN<sub>2</sub> [M + H]<sup>+</sup> 491.3187, found 491.3190.

***N*<sup>1</sup>-[(1'*S*)-2-(4-chlorophenyl)-1-phenylethyl]-*N*<sup>2</sup>-(2,6-di(propan-2-yl)phenyl)ethane-1,2-diamine [(1'*S*)-20w] and *N*<sup>1</sup>-[(1'*R*)-2-(4-chlorophenyl)-1-phenylethyl]-*N*<sup>2</sup>-(2,6-di(propan-2-yl)phenyl)ethane-1,2-diamine [(1'*R*)-20x]**

By following the synthetic procedure described for (2*R*,1'*R*)-20a and (2*R*,1'*S*)-20b, the reaction was performed with 1.57 g 21j (6.81 mmol) and 1.50 g 19c (6.81 mmol). The reaction time of the first step was 6 h and that of the second was 16 h. (*S*)-20w and (*R*)-20x were collected as an enantiomeric mixture (1.14 g, 3.32 mmol, 48.8%). The enantiomers were separated by chiral chromatography on IG (100×500 mm, 20 μm, flow rate: 50 mL/min) column.

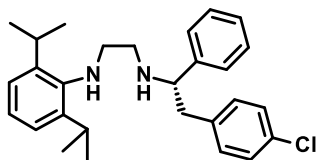

By chiral HPLC analysis, (*S*)-20w was found to be a single enantiomer, and eluted first on the IG column using 2:98 THF/heptane with 0.1% diethylamine as eluent. (*S*)-20w was collected as yellow oil (669 mg, 1.54 mmol, 22.6%). <sup>1</sup>H NMR (500 MHz, DMSO-*d*<sub>6</sub>) δ 7.27 (m, Ar-H, 2 H), 7.27 (m, Ar-H, 2 H), 7.25 (d, *J* = 8.4 Hz, Ar-H, 2 H), 7.20 (m, Ar-H, 1 H), 7.10 (d, *J* = 8.4 Hz, Ar-H, 2 H), 6.99 (d, *J* = 7.6 Hz, Ar-H, 2 H), 6.92 (dd, *J* = 8.3, 6.8 Hz, Ar-H, 1 H), 3.82 (t, *J* = 7.0 Hz, CH, 1 H), 3.67 (brs, NH, 1 H), 3.21 (sp, *J* = 6.7 Hz, 2 H), 2.97/2.83 (dd+dd, *J* = 13.4, 7.0 Hz, *J* = 13.4, 7.0 Hz, CH<sub>2</sub>, 2 H), 2.74 (m, CH<sub>2</sub>, 2 H), 2.49 (m, CH<sub>2</sub>, 2 H), 1.10 (d, *J* = 6.7 Hz, CH<sub>3</sub>, 12 H). <sup>13</sup>C NMR (125 MHz, DMSO-*d*<sub>6</sub>) δ 141.9, 131.4, 131.1, 128.1, 127.9, 127.8, 127.7, 127.2, 126.0, 123.1, 123.0, 63.8, 51.1, 47.0, 44.8, 26.8, 24.3. HRMS calcd for C<sub>28</sub>H<sub>36</sub>ClN<sub>2</sub> [M + H]<sup>+</sup> 435.2562, found 435.2565.

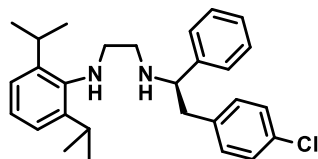

By chiral HPLC analysis, (*R*)-20x was found to be a single enantiomer, and eluted second on the IG column using 2:98 THF/heptane with 0.1% diethylamine as eluent. (*R*)-20x was collected as yellow oil (713 mg, 1.64 mmol, 24.1%). <sup>1</sup>H NMR (500 MHz, DMSO-*d*<sub>6</sub>) δ 7.27 (m, Ar-H, 2 H), 7.27 (m, Ar-H, 2 H), 7.25 (d, *J* = 8.4 Hz, Ar-H, 2 H), 7.20 (m, Ar-H, 1 H), 7.10 (d, *J* = 8.4 Hz, Ar-H, 2 H), 6.99 (d, *J* = 7.6 Hz, Ar-H, 2 H), 6.92 (dd, *J* = 8.3, 6.8 Hz, Ar-H, 1 H), 3.82 (t, *J* = 7.0 Hz, CH, 1 H), 3.67 (brs, NH, 1 H), 3.21 (sp, *J* = 6.7 Hz, CH, 2 H), 2.97/2.83 (dd+dd, *J* = 13.4, 7.0 Hz, *J* = 13.4, 7.0 Hz, CH<sub>2</sub>, 2 H), 2.74 (m, CH<sub>2</sub>, 2 H), 2.49 (m, CH<sub>2</sub>, 2 H), 1.10 (d, *J* = 6.7 Hz, CH<sub>3</sub>, 12 H). <sup>13</sup>C NMR (125 MHz, DMSO-*d*<sub>6</sub>) δ 141.9, 131.4, 131.1, 128.1, 127.9, 127.8, 127.7, 127.2, 126.0, 123.1, 123.0, 63.8, 51.1, 47.0, 44.8, 26.8, 24.3. HRMS calcd for C<sub>28</sub>H<sub>36</sub>ClN<sub>2</sub> [M + H]<sup>+</sup> 435.2562, found 435.2567.

**Method B (20u-v,y-z)**

Example for compound 20u:

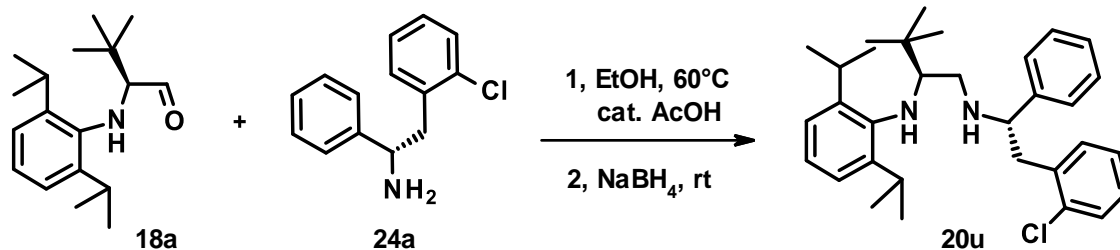

1.08 g of (*S*)-24a (4.66 mmol) was dissolved in 23 mL of EtOH under inert atmosphere, and then 662 mg of (*S*)-18a (4.66 mmol) was added in one portion and 27 μL of acetic acid (0.47 mmol) was also added. The mixture was stirred at 60°C. The mixture in the first reaction step was stirred for 2 h, until all amount of the (*S*)-18a had reacted, as monitored by GC-MS. When the starting material was consumed, the mixture was cooled to room temperature and 705 mg

NaBH<sub>4</sub> (18.6 mmol) was added carefully. The mixture was stirred for 16 h at room temperature and monitored by LC-MS. The reaction mixture was quenched with the addition of saturated aqueous NH<sub>4</sub>Cl solution, and then it was extracted with EtOAc. The combined organic layers were dried over MgSO<sub>4</sub>. The volatiles were removed under reduced pressure, and the residue was purified *via* column chromatography using a mixture of heptane and EtOAc as eluents.

**(2*S*)-*N*<sup>1</sup>-[(1'*S*)-2-(2-chlorophenyl)-1-phenylethyl]-*N*<sup>2</sup>-(2,6-di(propan-2-yl)phenyl)-3,3-dimethylbutane-1,2-diamine [(2*S*,1'*S*)-20u]**

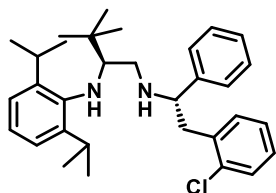

(2*S*,1'*S*)-**20u** was collected as yellow oil (2.02 g, 4.11 mmol, 88.2%). <sup>1</sup>H NMR (500 MHz, DMSO-*d*<sub>6</sub>) δ 7.35-6.88 (m, Ar-H, 4 H), 7.22-6.93 (m, Ar-H, 5 H), 6.97 (m, Ar-H, 2 H), 6.91 (m, Ar-H, 1 H), 3.51 (m, CH, 1 H), 3.20 (sp, *J* = 6.7 Hz, CH, 2 H), 3.11 (d, *J* = 11.6 Hz, NH, 1 H), 2.82 (dt, *J* = 11.6, 4.8 Hz, CH, 1 H), 2.75/2.70 (dd+dd, *J* = 13.4, 8.0 Hz, *J* = 13.4, 5.8 Hz, CH<sub>2</sub>, 2 H), 2.46/2.17 (m+m, CH<sub>2</sub>, 2 H), 1.52 (brs, NH, 1 H), 1.12 (d, *J* = 6.7 Hz, CH<sub>3</sub>, 6 H), 1.02 (d, *J* = 6.7 Hz, CH<sub>3</sub>, 6 H), 0.84 (s, CH<sub>3</sub>, 9 H). <sup>13</sup>C NMR (125 MHz, DMSO-*d*<sub>6</sub>) δ 143.9, 142.0, 140.4, 136.3, 133.2, 131.7, 129.0, 128.0, 126.8, 126.7, 126.6, 123.4, 122.2, 67.1, 62.1, 47.5, 41.9, 27.0, 24.0, 23.8. C<sub>32</sub>H<sub>44</sub>ClN<sub>2</sub> [M + H]<sup>+</sup> 491.3187, found 491.3190.

**(2*S*)-*N*<sup>1</sup>-[(1'*R*)-2-(2-chlorophenyl)-1-phenylethyl]-*N*<sup>2</sup>-(2,6-di(propan-2-yl)phenyl)-3,3-dimethylbutane-1,2-diamine [(2*S*,1'*R*)-20v]**

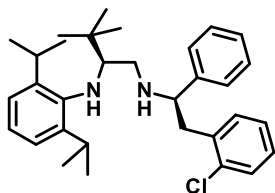

This compound was prepared by following the synthetic procedure described for (2*S*,1'*S*)-**20u** starting from 1.07 g of (*R*)-**24b** (4.62 mmol) and 1.27 g of (*S*)-**18a** (4.62 mmol). The reaction time of the first step was 2 h and that of the second was 16 h. (2*S*,1'*R*)-**20v** was collected as yellow oil (941 mg, 1.92 mmol, 41.5%). <sup>1</sup>H NMR (500 MHz, DMSO-*d*<sub>6</sub>) δ 7.36-6.86 (m, Ar-H, 12 H), 3.67 (q, *J* = 6.3 Hz, CH, 1 H), 3.21 (sp, *J* = 6.7 Hz, CH, 2 H), 3.19 (d, *J* = 11.4 Hz, NH, 1 H), 2.89 (dt, *J* = 11.4, 4.8 Hz, CH, 1 H), 2.84-2.77 (m, CH<sub>2</sub>, 2 H), 2.34 (dd, *J* = 6.9, 4.8 Hz, CH<sub>2</sub>, 2 H), 1.43 (brs, NH, 1 H), 1.12 (d, *J* = 6.7 Hz, CH<sub>3</sub>, 6 H), 1.04 (d, *J* = 6.7 Hz, CH<sub>3</sub>, 6 H), 0.88 (s, CH<sub>3</sub>, 9 H). <sup>13</sup>C NMR (125 MHz, DMSO-*d*<sub>6</sub>) δ 143.4, 142.3, 140.1, 136.5, 133.2, 131.9, 129.0, 128.0, 127.9, 126.6, 126.6, 123.3, 121.9, 66.9, 62.6, 48.3, 41.5, 35.1, 27.0, 27.0, 24.0, 23.7. C<sub>32</sub>H<sub>44</sub>ClN<sub>2</sub> [M + H]<sup>+</sup> 491.3187, found 491.3189.

**(2*S*)-*N*<sup>2</sup>-(2,6-di(propan-2-yl)phenyl)-3,3-dimethyl-*N*<sup>1</sup>-[(1'*S*)-1-(2-naphthyl)ethyl]butane-1,2-diamine [(2*S*,1'*S*)-20y]**

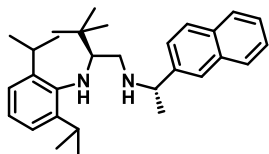

By following the synthetic procedure described for (2*S*,1'*S*)-**20u**, the reaction was performed with 855 mg of (1*S*)-1-(2-naphthyl)ethanamine (4.99 mmol) and 1.25 g of (*S*)-**18a** (4.54 mmol). The reaction time of the first step was 1 h and that of the second step was 4 h. (2*S*,1'*S*)-**20y** was collected as yellow oil (939 mg, 2.18 mmol, 48.0%). <sup>1</sup>H NMR (500 MHz, DMSO-*d*<sub>6</sub>) δ 7.87-7.38 (m, Ar-H, 4 H), 7.79 (d, *J* = 8.4 Hz, Ar-H, 1 H), 7.44 (br, Ar-H, 1 H), 7.34 (dd, *J* = 8.4 Hz, *J* = 1.3 Hz, Ar-H, 1 H), 7.04 (d, *J* = 7.6 Hz, Ar-H, 2 H), 6.96 (t, *J* = 7.6 Hz, Ar-H, 1 H), 3.49 (q, *J* = 6.7 Hz, CH, 1 H), 3.38-3.29 (sp, *J* = 6.7 Hz, CH, 2 H), 3.25 (d, *J* = 12.2 Hz, NH, 1 H), 3.00 (m, CH, 1 H), 2.51/2.37 (m+m, CH<sub>2</sub>, 2 H), 1.34 (brs, NH, 1 H), 1.18 (d, *J* = 6.7 Hz, CH<sub>3</sub>, 6 H), 1.10 (d, *J* = 6.7 Hz, CH<sub>3</sub>, 3 H), 1.09 (d, *J* = 6.7 Hz, CH<sub>3</sub>, 3 H), 1.05 (d, *J* = 6.7 Hz, CH<sub>3</sub>, 3 H), 0.94 (s, CH<sub>3</sub>, 9 H). <sup>13</sup>C NMR (125 MHz, DMSO-*d*<sub>6</sub>) δ 143.6, 142.4, 140.5, 132.9, 132.2, 127.7, 127.5, 127.4,



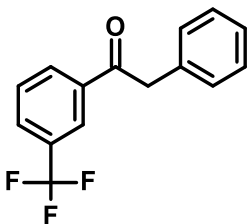

By following the synthetic procedure described for **21a**, the reaction was performed with 3.08 mL *N*-methoxy-*N*-methyl-3-(trifluoromethyl)benzamide (17.2 mmol) in 85 mL THF and 12.9 mL benzyl(chloro)magnesium (25.7 mmol). **21b** was collected as yellow oil (3.37 g, 12.8 mmol, 74.3%). <sup>1</sup>H NMR (500 MHz, DMSO-*d*<sub>6</sub>) δ 8.35 (d, *J* = 7.8 Hz, Ar-H, 1 H), 8.29 (brs, Ar-H, 1 H), 8.02 (d, *J* = 7.8 Hz, Ar-H, 1 H), 7.79 (t, *J* = 7.8 Hz, Ar-H, 1 H), 7.38-7.19 (m, Ar-H, 5 H), 4.50 (s, CH<sub>2</sub>, 2 H). <sup>13</sup>C NMR (125 MHz, DMSO-*d*<sub>6</sub>) δ 196.8, 137.1, 134.7, 132.4, 130.2, 129.8, 128.3, 126.6, 44.8. HRMS calcd for C<sub>15</sub>H<sub>11</sub>F<sub>3</sub>O [M]<sup>+</sup> 264.0762, found 264.0748.

#### 1-(2-methoxyphenyl)-2-phenyl-ethanone (21c)

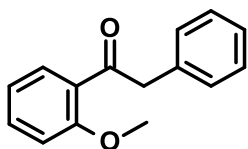

By following the synthetic procedure described for **21a**, the reaction was performed with 0.94 mL *N*,2-dimethoxy-*N*-methyl-benzamide (5.12 mmol) in 25 mL THF and 3.84 mL benzyl(chloro)magnesium (7.68 mmol). **21c** was collected as colorless oil (949 mg, 4.19 mmol, 81.9%). <sup>1</sup>H NMR (500 MHz, DMSO-*d*<sub>6</sub>) δ 7.53 (dm, *J* = 7.7 Hz, Ar-H, 1 H), 7.52 (td, *J* = 7.7, 1.2 Hz, Ar-H, 1 H), 7.34-7.15 (m, Ar-H, 5 H), 7.16 (dm, *J* = 7.7 Hz, Ar-H, 1 H), 7.01 (td, *J* = 7.7, 1.2 Hz, Ar-H, 1 H), 4.25 (s, CH<sub>2</sub>, 2 H), 3.90 (s, CH<sub>3</sub>, 3 H). <sup>13</sup>C NMR (125 MHz, DMSO-*d*<sub>6</sub>) δ 199.7, 158.0, 135.3, 133.7, 129.7, 129.7, 128.2, 127.9, 126.4, 120.5, 112.4, 55.7, 49.4. HRMS calcd for C<sub>15</sub>H<sub>15</sub>O<sub>2</sub> [M + H]<sup>+</sup> 227.1067, found 227.1067.

#### 1-(3-methoxyphenyl)-2-phenyl-ethanone (21d)

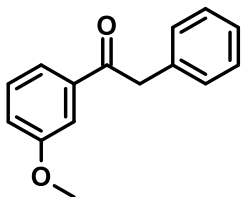

By following the synthetic procedure described for **21a**, the reaction was performed with 2.50 mg *N*,3-dimethoxy-*N*-methyl-benzamide (12.8 mmol) in 25 mL THF and 27.4 mL benzyl(chloro)magnesium (38.4 mmol). **21d** was collected as yellow oil (2.73 g, 12.1 mmol, 94.1%). <sup>1</sup>H NMR (400 MHz, DMSO-*d*<sub>6</sub>) δ 7.66 (dm, *J* = 7.9 Hz, Ar-H, 1 H), 7.52 (dd, *J* = 2.6, 1.5 Hz, Ar-H, 1 H), 7.45 (t, *J* = 7.9 Hz, Ar-H, 1 H), 7.36-7.17 (m, Ar-H, 5 H), 7.21 (dm, *J* = 7.9 Hz, Ar-H, 1 H), 4.38 (s, CH<sub>2</sub>, 2 H), 3.81 (s, CH<sub>3</sub>, 3 H). <sup>13</sup>C NMR (100 MHz, DMSO-*d*<sub>6</sub>) δ 197.5, 159.4, 137.8, 135.1, 129.9, 129.7, 128.3, 126.5, 120.9, 119.2, 112.9, 55.3, 44.9. HRMS calcd for C<sub>15</sub>H<sub>15</sub>O<sub>2</sub> [M + H]<sup>+</sup> 227.1067, found 227.1065.

#### 1-(4-methoxyphenyl)-2-phenyl-ethanone (21e)

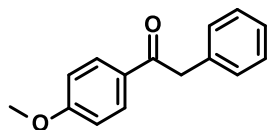

By following the synthetic procedure described for **21a**, the reaction was performed with 1.80 mL *N*,4-dimethoxy-*N*-methyl-benzamide (10.2 mmol) in 51 mL THF and 7.68 mL benzyl(chloro)magnesium (15.4 mmol). **21e** was collected as white solid (2.31 g, 10.2 mmol, 99.8%). Mp: 115-117°C. <sup>1</sup>H NMR (500 MHz, DMSO-*d*<sub>6</sub>) δ 8.03 (m, Ar-H, 2 H), 7.34-7.18 (m, Ar-H, 5 H), 7.04 (m, Ar-H, 2 H), 4.31 (s, CH<sub>2</sub>, 2 H), 3.84 (s, CH<sub>3</sub>, 3 H). <sup>13</sup>C NMR (125 MHz, DMSO-*d*<sub>6</sub>) δ 196.1, 163.2, 135.5, 130.8, 129.6, 129.2, 128.3, 126.4, 114.0, 55.6, 44.4. HRMS calcd for C<sub>15</sub>H<sub>15</sub>O<sub>2</sub> [M + H]<sup>+</sup> 227.1067, found 227.1067.

#### 1-(*o*-tolyl)-2-phenyl-ethanone (21f)

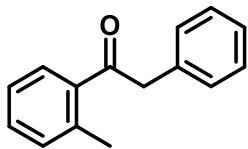

By following the synthetic procedure described for **21a**, the reaction was performed with 0.94 mL *N*-methoxy-*N*,2-dimethyl-benzamide (55.8 mmol) in 28 mL THF and 4.18 mL benzyl(chloro)magnesium (8.37 mmol). **21f** was collected as yellow oil (863 mg, 4.10 mmol, 73.5%). <sup>1</sup>H NMR (500 MHz, DMSO-*d*<sub>6</sub>) δ 7.90 (dd, *J* = 7.5, 1.2 Hz, Ar-H, 1 H), 7.41 (td, *J* = 7.5, 1.2 Hz, Ar-H, 1 H), 7.32 (t, *J* = 7.5 Hz, Ar-H, 1 H), 7.30 (m, Ar-H, 2 H), 7.27

(d,  $J = 7.5$  Hz, Ar-H, 1 H), 7.23 (dm,  $J = 7.2$  Hz, Ar-H, 2 H), 7.22 (m, Ar-H, 1 H), 4.29 (s, CH<sub>2</sub>, 2 H), 2.33 (s, CH<sub>3</sub>, 3 H). <sup>13</sup>C NMR (125 MHz, DMSO-*d*<sub>6</sub>)  $\delta$  201.6, 137.7, 137.1, 135.0, 131.6, 131.2, 129.7, 128.8, 128.3, 126.5, 125.8, 47.8, 20.6. HRMS calcd for C<sub>15</sub>H<sub>14</sub>O [M]<sup>+</sup> 210.1045, found 210.1019.

### 2-phenyl-1-(p-tolyl)ethanone (**21g**)

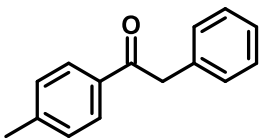

By following the synthetic procedure described for **21a**, the reaction was performed with 0.94 mL *N*-methoxy-*N*,4-dimethyl-benzamide (5.58 mmol) in 28 mL THF and 4.18 mL benzyl(chloro)magnesium (8.37 mmol). **21g** was collected as white solid (956 mg, 4.55 mmol, 81.5%). mp 110-112 °C. <sup>1</sup>H NMR (500 MHz, DMSO-*d*<sub>6</sub>)  $\delta$  7.95 (d,  $J = 8.1$  Hz, Ar-H, 2 H), 7.33 (d,  $J = 8.1$  Hz, Ar-H, 2 H), 7.30 (t,  $J = 7.2$  Hz, Ar-H, 2 H), 7.25 (d,  $J = 7.2$  Hz, Ar-H, 2 H), 7.22 (t,  $J = 7.2$  Hz, Ar-H, 1 H), 4.34 (s, CH<sub>2</sub>, 2 H), 2.37 (s, CH<sub>3</sub>, 3 H). <sup>13</sup>C NMR (125 MHz, DMSO-*d*<sub>6</sub>)  $\delta$  197.2, 143.7, 135.3, 133.9, 129.7, 129.3, 128.6, 128.3, 126.4, 44.6, 21.2. HRMS calcd for C<sub>15</sub>H<sub>15</sub>O [M + H]<sup>+</sup> 211.1117, found 211.1118.

### 2-phenyl-1-[4-(trifluoromethyl)phenyl]ethanone (**21h**)

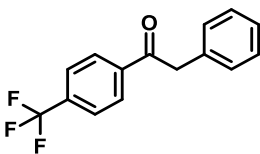

By following the synthetic procedure described for **21a**, the reaction was performed with 2.31 mL *N*-methoxy-*N*-methyl-4-(trifluoromethyl)benzamide (12.9 mmol) in 65 mL THF and 9.65 mL benzyl(chloro)magnesium (19.3 mmol). **21h** was collected as white solid (2.63 g, 9.95 mmol, 77.4%). mp 127-129 °C. <sup>1</sup>H NMR (500 MHz, DMSO-*d*<sub>6</sub>)  $\delta$  8.23 (dm,  $J = 8.2$  Hz, Ar-H, 2 H), 7.91 (dm,  $J = 8.2$  Hz, Ar-H, 2 H), 7.37-7.20 (m, Ar-H, 5 H), 4.47 (s, CH<sub>2</sub>, 2 H). <sup>13</sup>C NMR (125 MHz, DMSO-*d*<sub>6</sub>)  $\delta$  197.2, 139.6, 134.6, 132.7, 132.4, 129.8, 129.2, 128.4, 126.6, 125.8, 125.8, 45.0. HRMS calcd for C<sub>15</sub>H<sub>12</sub>F<sub>3</sub>O [M + H]<sup>+</sup> 265.0835, found 265.0835.

### 1-phenyl-2-(p-tolyl)ethanone (**21i**)

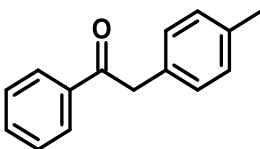

By following the synthetic procedure described for **21a**, the reaction was performed with 0.92 mL *N*-methoxy-*N*-methyl-benzamide (6.05 mmol) in 30 mL THF and 20 mL chloro(p-tolylmethyl)magnesium (9.10 mmol). **21i** was collected as white solid (974 mg, 4.63 mmol, 76.5%). mp 94-96 °C. <sup>1</sup>H NMR (500 MHz, DMSO-*d*<sub>6</sub>)  $\delta$  8.03 (dm,  $J = 7.2$  Hz, Ar-H, 2 H), 7.63 (tm,  $J = 7.2$  Hz, Ar-H, 1 H), 7.52 (tm,  $J = 7.2$  Hz, Ar-H, 2 H), 7.15 (dm,  $J = 8.0$  Hz, Ar-H, 2 H), 7.11 (dm,  $J = 8.0$  Hz, Ar-H, 2 H), 4.32 (s, CH<sub>2</sub>, 2 H), 2.26 (s, CH<sub>3</sub>, 3 H). <sup>13</sup>C NMR (125 MHz, DMSO-*d*<sub>6</sub>)  $\delta$  197.8, 136.3, 135.5, 132.0, 129.5, 128.9, 128.8, 128.4, 44.4, 20.7. HRMS calcd for C<sub>15</sub>H<sub>15</sub>O [M + H]<sup>+</sup> 211.1117, found 211.1115.

### 2-(4-chlorophenyl)-1-phenyl-ethanone (**21j**)

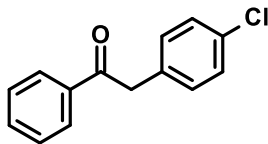

By following the synthetic procedure described for **21a**, the reaction was performed with 1.38 mL *N*-methoxy-*N*-methyl-benzamide (9.08 mmol) in 45 mL THF and 54 mL collected chloro-[(4-chlorophenyl)methyl]magnesium (13.6 mmol). **21j** was as white solid (902 mg, 3.91 mmol, 43.1%). mp 128-130 °C. <sup>1</sup>H NMR (400 MHz, DMSO-*d*<sub>6</sub>)  $\delta$  8.05 (dm,  $J = 7.3$  Hz, Ar-H, 2 H), 7.65 (tm,  $J = 7.3$  Hz, Ar-H, 1 H), 7.54 (tm,  $J = 7.3$  Hz, Ar-H, 2 H), 7.38 (dm,  $J = 8.5$  Hz, Ar-H, 2 H), 7.29 (dm,  $J = 8.5$  Hz, Ar-H, 2 H), 4.43 (s, CH<sub>2</sub>, 2 H). <sup>13</sup>C NMR (100 MHz, DMSO-*d*<sub>6</sub>)  $\delta$  197.4, 136.3, 134.2, 133.4, 131.7, 131.2, 128.8, 128.3, 128.2, 43.9. HRMS calcd for C<sub>14</sub>H<sub>12</sub>ClO [M + H]<sup>+</sup> 231.0571, found 231.0559.

### 2-(2-chlorophenyl)-1-phenyl-ethanone (21k)

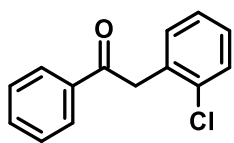

By following the synthetic procedure described for **21a**, the reaction was performed with 1.38 mL *N*-methoxy-*N*-methyl-benzamide (9.08 mmol) in 45 mL THF and 54 mL chloro-[(2-chlorophenyl)methyl]magnesium (13.6 mmol). **21k** was collected as white solid (1.82 g, 7.89 mmol, 86.8%). mp 71-73 °C. <sup>1</sup>H NMR (500 MHz, DMSO-*d*<sub>6</sub>) δ 8.08 (dm, *J* = 7.6 Hz, Ar-H, 2 H), 7.68 (tm, *J* = 7.6 Hz, Ar-H, 1 H), 7.57 (tm, *J* = 7.6 Hz, Ar-H, 2 H), 7.50-7.28 (m, Ar-H, 4 H), 4.57 (s, CH<sub>2</sub>, 2 H). <sup>13</sup>C NMR (125 MHz, DMSO-*d*<sub>6</sub>) δ 196.2, 136.3, 133.9, 133.5, 132.6, 129.0, 128.9, 128.7, 128.1, 127.1, 43.1. HRMS calcd for C<sub>14</sub>H<sub>12</sub>ClO [M + H]<sup>+</sup> 231.0571, found 231.0575.

## 1.6 Synthesis of of Substituted 1-phenylethanamine (22-24a,b)

### 2-(2-chlorophenyl)-1-phenyl-ethanol (22)

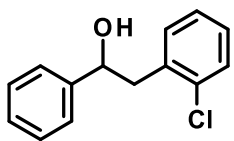

3.44 g LiAlH<sub>4</sub> (90.6 mmol) was dissolved in 300 mL THF at 0°C and 6.97 g **21k** (30.2 mmol) was added in small portions. The reaction mixture was stirred at room temperature for 60 min, when complete conversion was observed by LC-MS. The reaction mixture was cooled to 0°C and 1.5 mL water, 3 mL 2N NaOH and 3 mL water was added slowly to the mixture. MTBE was added to the mixture at the previous temperature and stirred for 10 min. The mixture was filtered, washed with MTBE. **22** was collected as white solid (6.47 g, 27.8 mmol, 92.0%). mp 71-73 °C. <sup>1</sup>H NMR (500 MHz, DMSO-*d*<sub>6</sub>) δ 7.42-7.17 (m, Ar-H, 9 H), 5.36 (d, *J* = 4.8 Hz, OH, 1 H), 4.80 (m, CH, 1 H), 3.01-2.93 (m, CH<sub>2</sub>, 2 H). <sup>13</sup>C NMR (125 MHz, DMSO-*d*<sub>6</sub>) δ 145.6, 136.5, 133.3, 132.3, 129.0, 128.0, 128.0, 126.9, 126.7, 125.8, 71.9, 43.3. HRMS calcd for C<sub>14</sub>H<sub>12</sub>Cl [M - OH]<sup>+</sup> 215.0622, found 215.0622.

### *tert*-butyl *N*-*tert*-butoxycarbonyl-*N*-[2-(2-chlorophenyl)-1-phenyl-ethyl]carbamate (23)

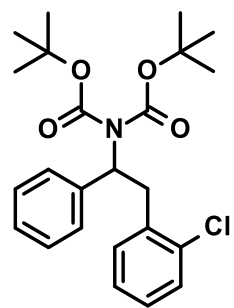

6.46 g **22** (27.8 mmol) was dissolved in 139 mL toluene under inert atmosphere, then 6.03 g *di**tert*-butyl-iminodicarboxylate (27.8 mmol), 7.82 g triphenylphosphine (27.8 mmol) and 6.39 g *di**tert*-butyl-azodicarboxylate (27.8 mmol) were added. The mixture was stirred at room temperature for 60 min, when a complete conversion was observed by HPLC-MS. The volatiles were removed under reduced pressure and the residue was purified by column chromatography using a mixture of heptane and EtOAc as eluent. **23** was collected as white solid (5.76 g, 13.3 mmol, 48.1%). mp 88-90 °C. <sup>1</sup>H NMR (500 MHz, DMSO-*d*<sub>6</sub>) δ 7.46-7.18 (m, Ar-H, 9 H), 5.66 (dd, *J* = 11.4, 4.4 Hz, CH, 1 H), 3.63/3.53 (dd+dd, *J* = 13.3, 11.4 Hz, *J* = 13.3, 4.4 Hz, CH<sub>2</sub>, 2 H), 1.18 (s, CH<sub>3</sub>, 18 H). <sup>13</sup>C NMR (125 MHz, DMSO-*d*<sub>6</sub>) δ 152.0, 140.2, 135.7, 133.7, 133.3, 133.2, 132.0, 129.2, 128.8, 128.8, 128.5, 128.3, 127.2, 127.1, 126.7, 81.5, 57.3, 34.4, 27.2. HRMS calcd for C<sub>24</sub>H<sub>30</sub>ClO<sub>4</sub>Na [M + Na]<sup>+</sup> 454.1756, found 454.1766.

### (*S*)-2-(2-chlorophenyl)-1-phenyl-ethanamine [(*S*)-24a] and (*R*)-2-(2-chlorophenyl)-1-phenyl-ethanamine [(*R*)-24b]

5.76 g **23** (13.3 mmol) was dissolved in 67 mL DCM and 33.3 mL 2,2,2-trifluoroacetic acid (436 mmol) was added. The mixture was stirred at room temperature for 60 min, when a complete conversion was observed by HPLC-MS. The volatiles were removed under reduced pressure and pH was set to 7 with saturated aqueous NaHCO<sub>3</sub> solution. Then it was extracted with DCM. The combined organic layers were dried over MgSO<sub>4</sub> and the volatiles were removed under reduced pressure. The crude product was purified by column chromatography using DCM with



1.2% methanolic ammonia as an eluent. (*S*)-**24a** and (*R*)-**24b** were collected as a racemic mixture (2.11 g, 9.11 mmol, 68.3%). The enantiomers were separated by chiral preparative chromatography on OD-H (100×500mm, 20μm, Flow rate: 20 mL/min) column.

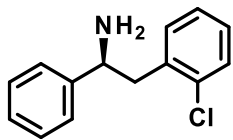

By chiral HPLC analysis, (*S*)-**24a** was found to be a single enantiomer and eluted first on the OD-H column using 1-PrOH/heptane (15:85) with 0.1% diethylamine as an eluent ( $t_R = 5.10$  min). (*S*)-**24a** was collected as yellow oil (1052 mg, 4.54 mmol, 34.0%).  $^1\text{H}$  NMR (500 MHz, DMSO- $d_6$ )  $\delta$  7.42-7.14 (m, Ar-H, 9 H), 4.09 (dd,  $J = 7.9, 6.3$  Hz, CH, 1 H), 2.96/2.91 (dd+dd,  $J = 13.3, 6.3$  Hz,  $J = 13.3, 7.9$  Hz, CH<sub>2</sub>, 2 H), 1.98 (brs, NH, 2 H).  $^{13}\text{C}$  NMR (125 MHz, DMSO- $d_6$ )  $\delta$  146.6, 137.0, 132.1, 129.1, 128.0, 127.9, 126.8, 126.5, 126.3, 55.5, 43.6. HRMS calcd for C<sub>14</sub>H<sub>15</sub>ClN [M + H]<sup>+</sup> 232.0886, found 232.0887.

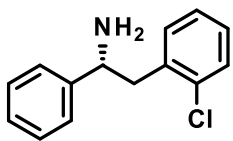

By chiral HPLC analysis, (*R*)-**24b** was obtained as a single enantiomer and eluted second on the OD-H column using 1-PrOH/heptane (15:85) with 0.1% diethylamine as an eluent ( $t_R = 8.48$  min). (*R*)-**24b** was collected as yellow oil (1041 mg, 4.49 mmol, 33.7%).  $^1\text{H}$  NMR (500 MHz, DMSO- $d_6$ )  $\delta$  7.41-7.15 (m, Ar-H, 9 H), 4.09 (dd,  $J = 7.9, 6.2$  Hz, CH, 1 H), 2.96/2.91 (dd+dd,  $J = 13.3, 6.2$  Hz,  $J = 13.3, 7.9$  Hz, CH<sub>2</sub>, 2 H), 1.97 (brs, NH, 2 H).  $^{13}\text{C}$  NMR (125 MHz, DMSO- $d_6$ )  $\delta$  146.6, 137.0, 132.1, 129.1, 128.0, 127.9, 126.8, 126.5, 126.3, 55.5, 43.6. HRMS calcd for C<sub>14</sub>H<sub>15</sub>ClN [M + H]<sup>+</sup> 232.0886, found 232.0887.

## 1.7 References for Known Compounds

1. Szabó, Z.; Timári, M.; Kassai, R.; Szokol, B.; Bényei, A. Cs.; Gáti, T.; Paczal, A.; Kotschy, A. *Organometallics* **2020**, *39*, 3572–3589.
2. Paczal, A.; Bényei, A. Cs.; Kotschy, A. *J. Org. Chem.* **2006**, *71*, 16, 5969–5979.

## 2 NMR Spectra ( $^1\text{H}$ and $^{13}\text{C}$ )

(5*S*,1'*S*)-5-*tert*-butyl-1-(2,6-di(propan-2-yl)phenyl)-3-[1-(2-naphthyl)ethyl]-4,5-dihydro-1*H*-imidazol-3-ium chloride [(5*S*,1'*S*)-3a]

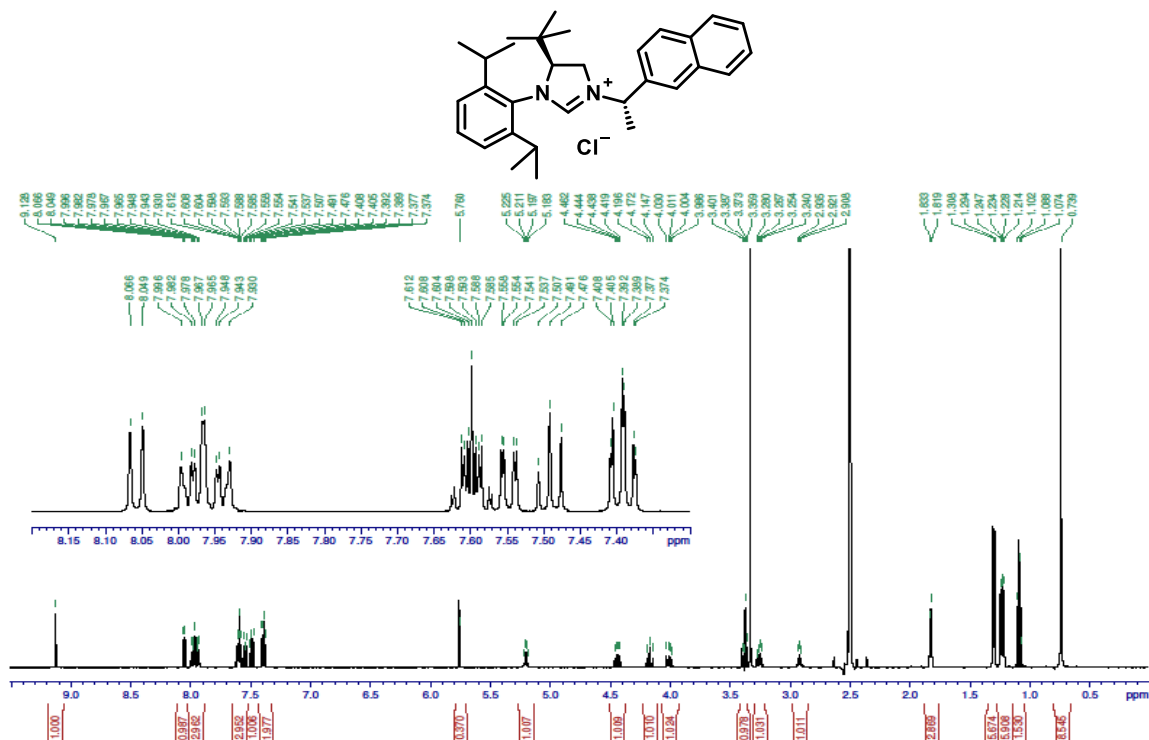

Figure S1.  $^1\text{H}$  NMR (500 MHz) spectrum of 3a in  $\text{DMSO}-d_6$

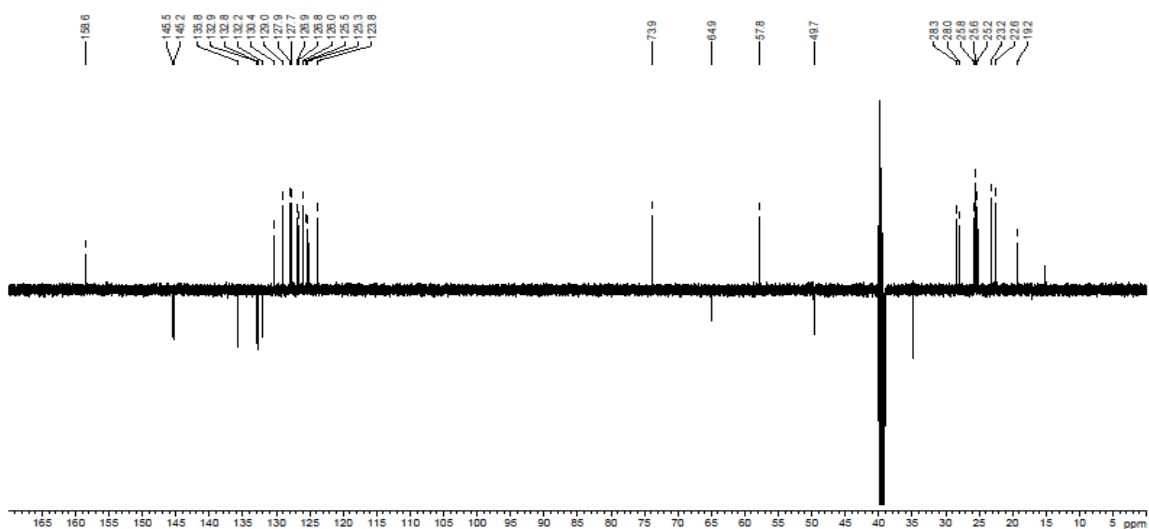

Figure S2.  $^{13}\text{C}$  NMR (125 MHz) spectrum of 3a in  $\text{DMSO}-d_6$

**(5*S*,1'*R*)-5-*tert*-butyl-1-(2,6-di(propan-2-yl)phenyl)-3-[1-(2-naphthyl)ethyl]-4,5-dihydro-1*H*-imidazol-3-ium chloride [(5*S*,1'*R*)-3b]**

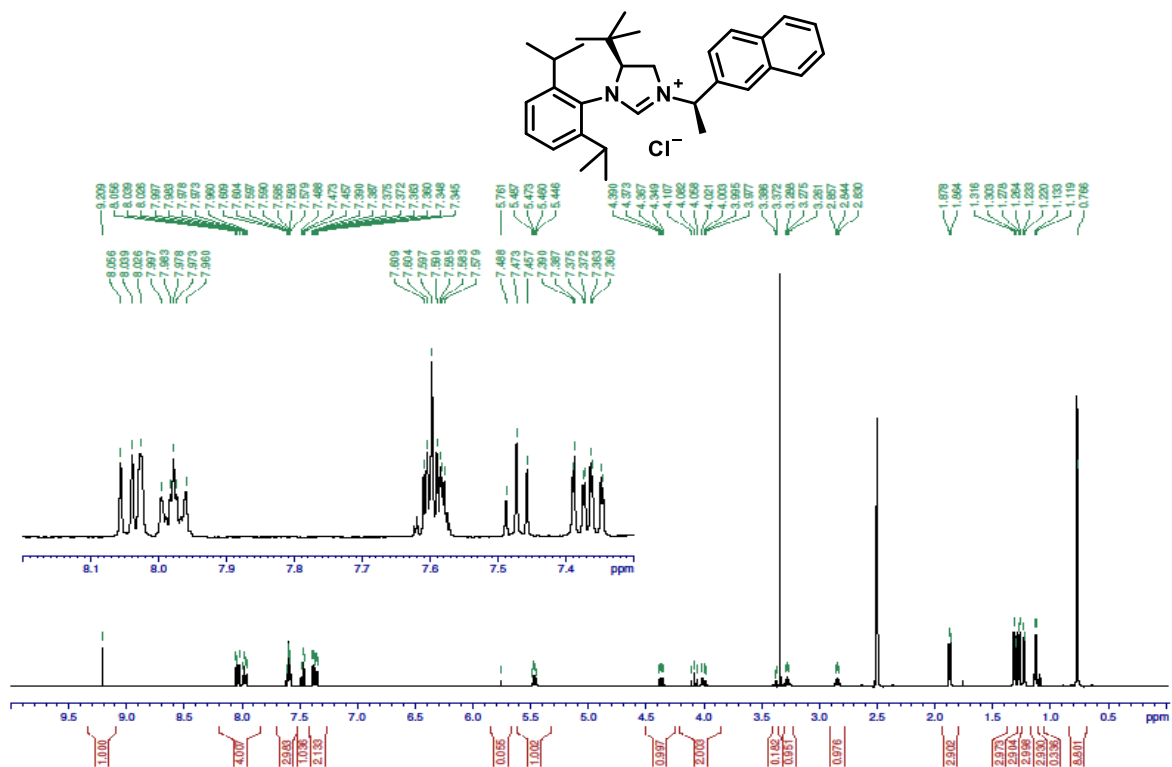

**Figure S3.**  $^1\text{H}$  NMR (500 MHz) spectrum of 3b in  $\text{DMSO}-d_6$

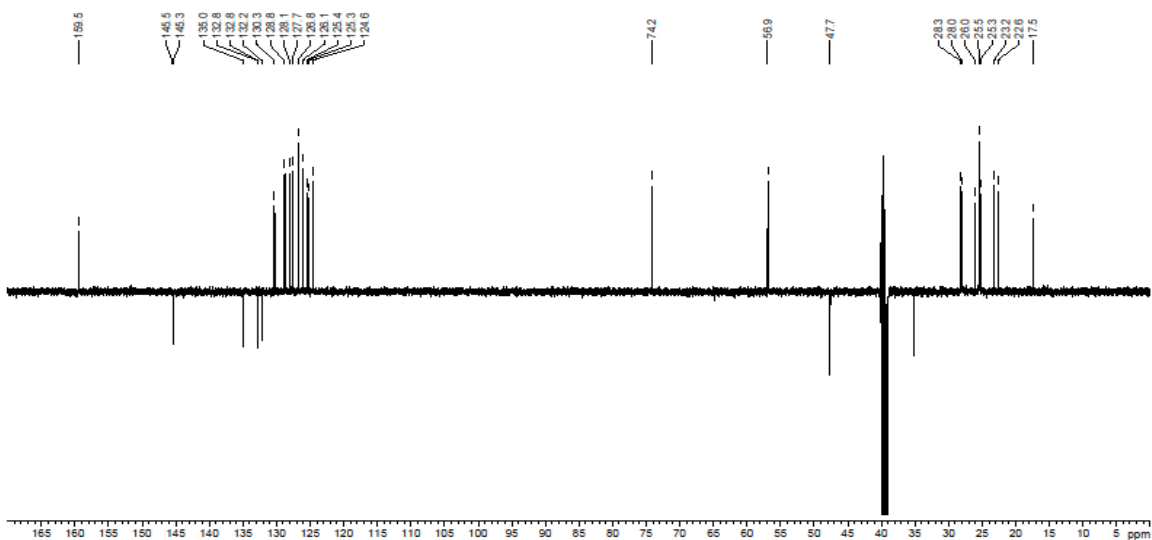

**Figure S4.**  $^{13}\text{C}$  NMR (125 MHz) spectrum of 3b in  $\text{DMSO}-d_6$

**(5*R*,1'*R*)-5-*tert*-butyl-3-[2-(3-chlorophenyl)-1-phenylethyl]-1-(2,6-di(*propan*-2-yl)phenyl)-4,5-dihydro-1*H*-imidazol-3-ium chloride [(5*R*,1'*R*)-6a]**

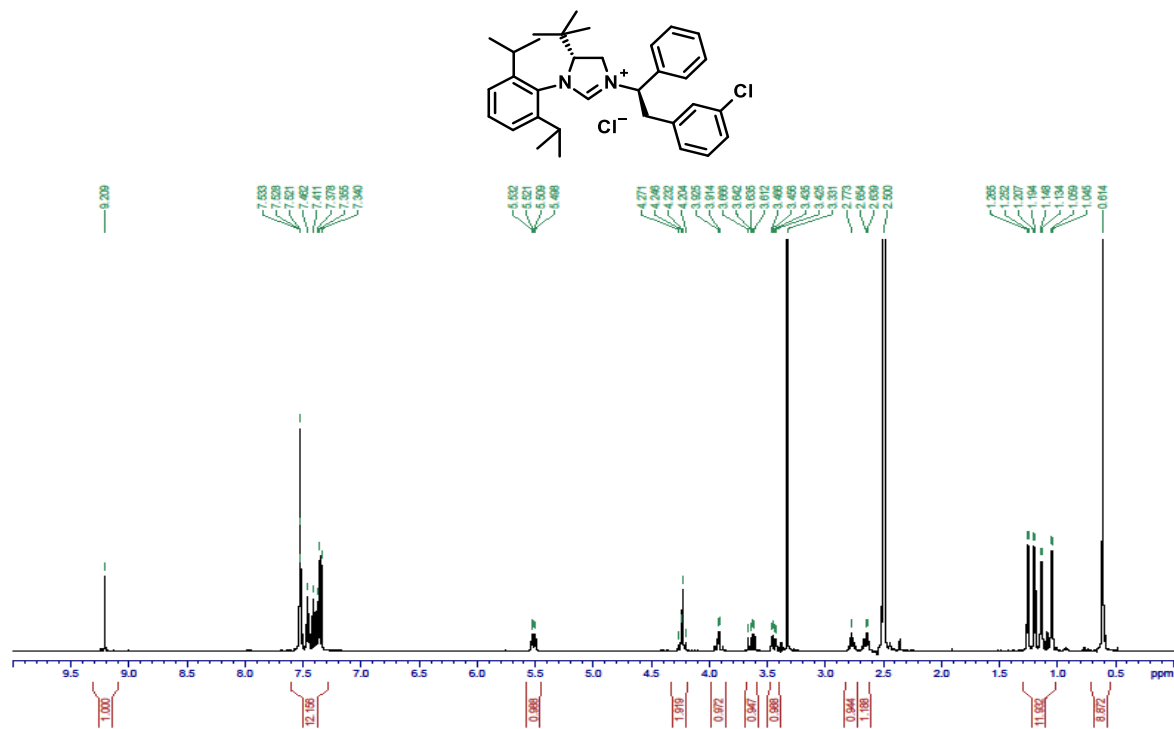

**Figure S5.**  $^1\text{H}$  NMR (500 MHz) spectrum of **6a** in  $\text{DMSO}-d_6$

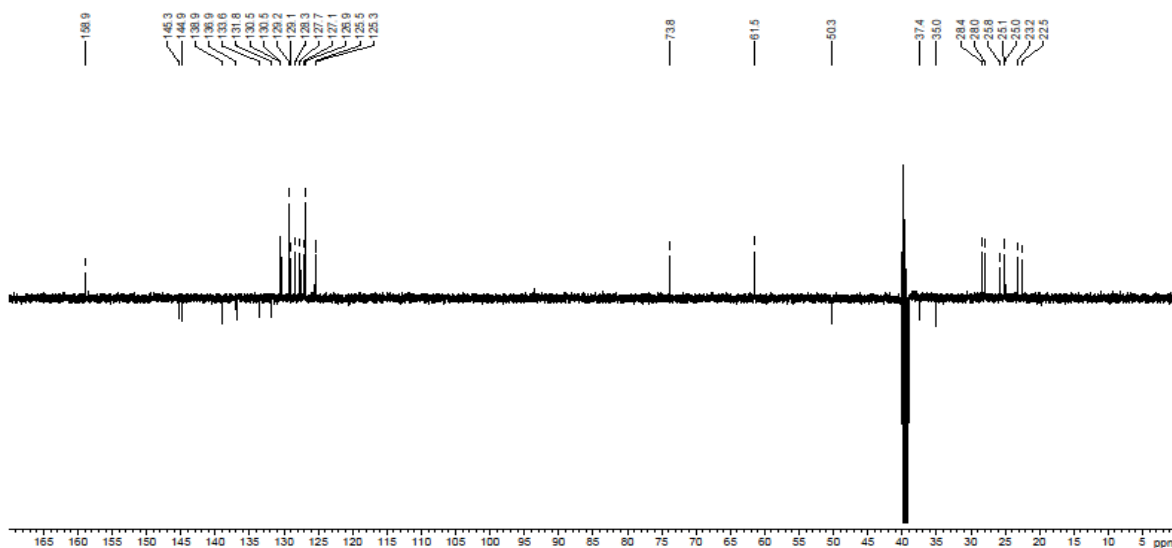

**Figure S6.**  $^{13}\text{C}$  NMR (125 MHz) spectrum of **6a** in  $\text{DMSO}-d_6$

**(5*R*,1'*S*)-5-*tert*-butyl-3-[2-(3-chlorophenyl)-1-phenylethyl]-1-(2,6-di(propan-2-yl)phenyl)-4,5-dihydro-1*H*-imidazol-3-ium chloride [(5*R*,1'*S*)-6b]**

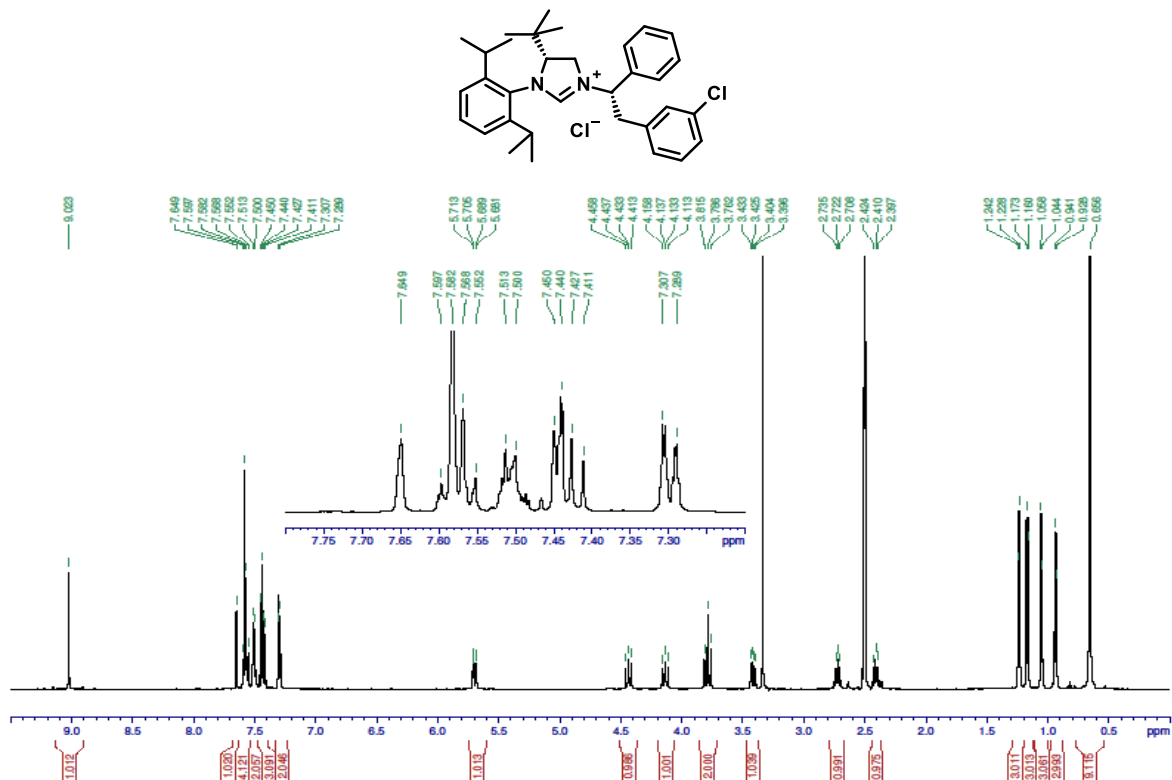

**Figure S7.**  $^1\text{H}$  NMR (500 MHz) spectrum of **6b** in  $\text{DMSO}-d_6$

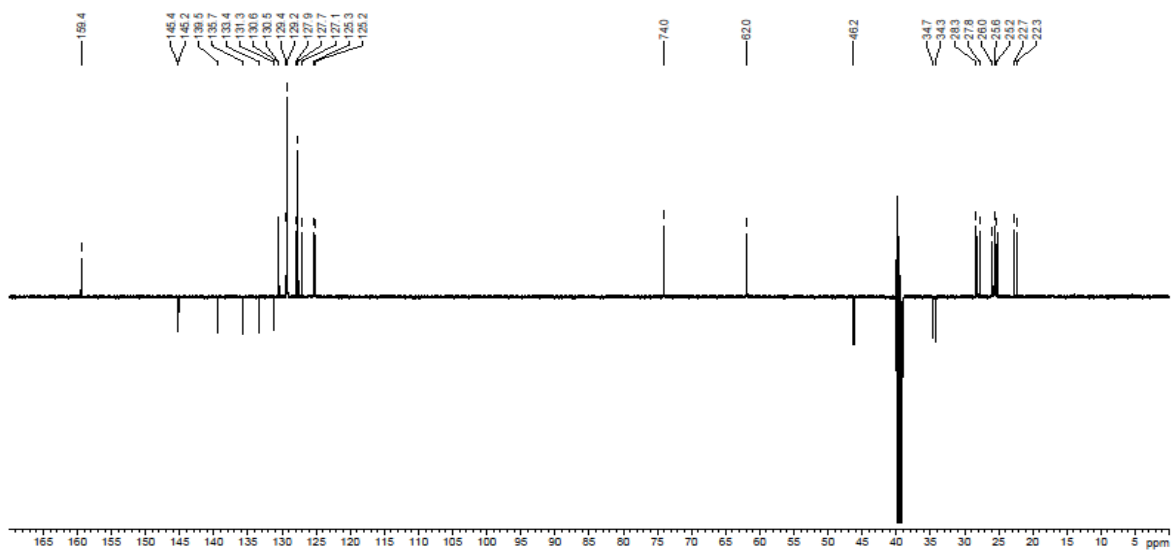

**Figure S8.**  $^{13}\text{C}$  NMR (125 MHz) spectrum of **6b** in  $\text{DMSO}-d_6$

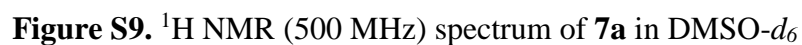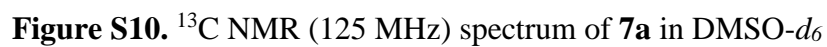

**(5*R*,1'*S*)-5-*tert*-butyl-1-(2,6-di(propan-2-yl)phenyl)-3-[2-phenyl-1-[3-(trifluoromethyl)phenyl]ethyl]-4,5-dihydro-1*H*-imidazol-3-ium chloride [(5*R*,1'*S*)-7b]**

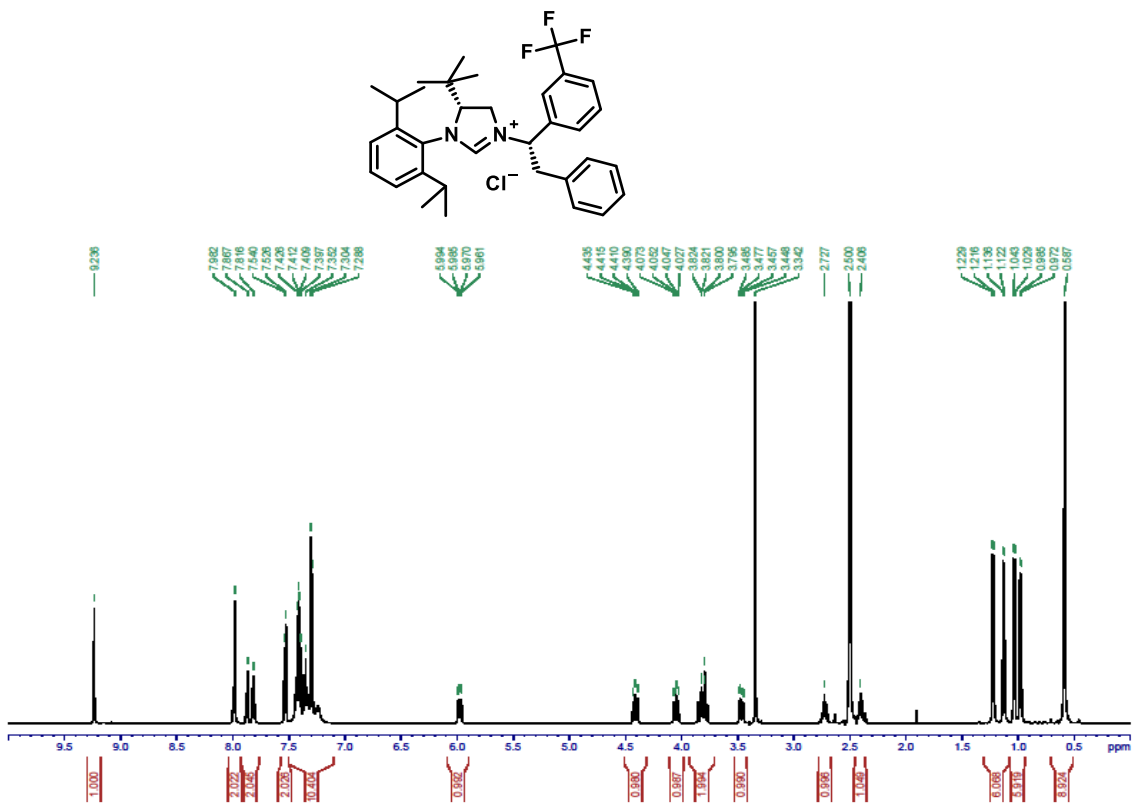

**Figure S11.** <sup>1</sup>H NMR (500 MHz) spectrum of **7b** in DMSO-*d*<sub>6</sub>

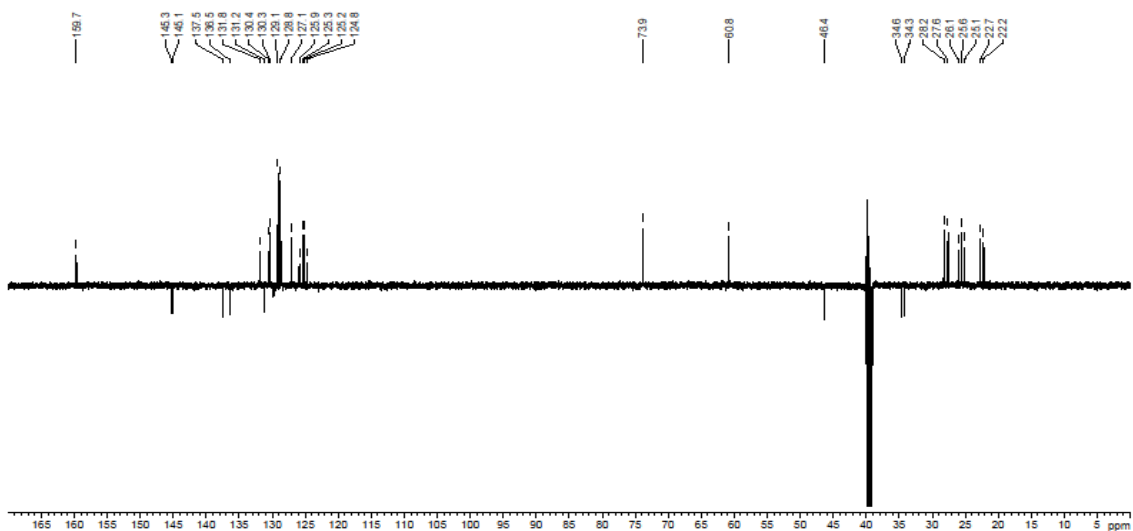

**Figure S12.** <sup>13</sup>C NMR (125 MHz) spectrum of **7b** in DMSO-*d*<sub>6</sub>

**(5*S*,1'*S*)-5-*tert*-butyl-1-(2,6-di(propan-2-yl)phenyl)-3-[1-(2-methoxyphenyl)-2-phenylethyl]-4,5-dihydro-1*H*-imidazol-3-ium chloride [(5*S*,1'*S*)-8a]**

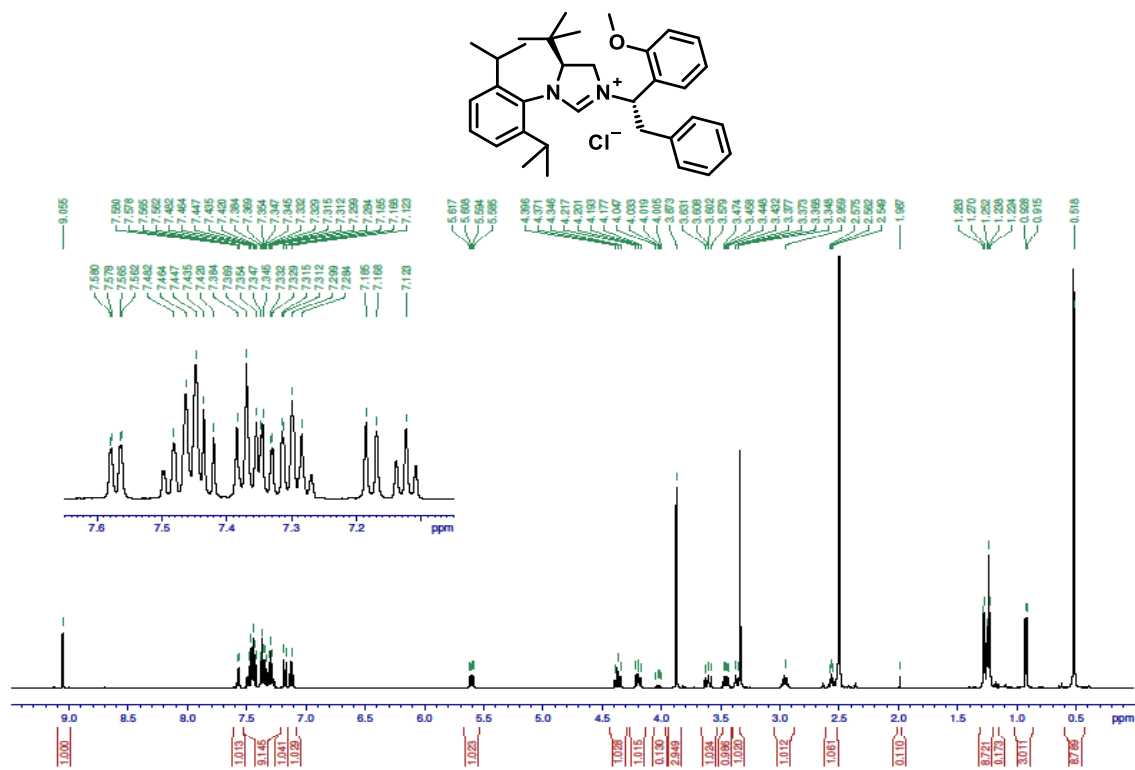



**(5*S*,1'*R*)-5-*tert*-butyl-1-(2,6-di(propan-2-yl)phenyl)-3-[1-(2-methoxyphenyl)-2-phenylethyl]-4,5-dihydro-1*H*-imidazol-3-ium chloride [(5*S*,1'*R*)-8b]**

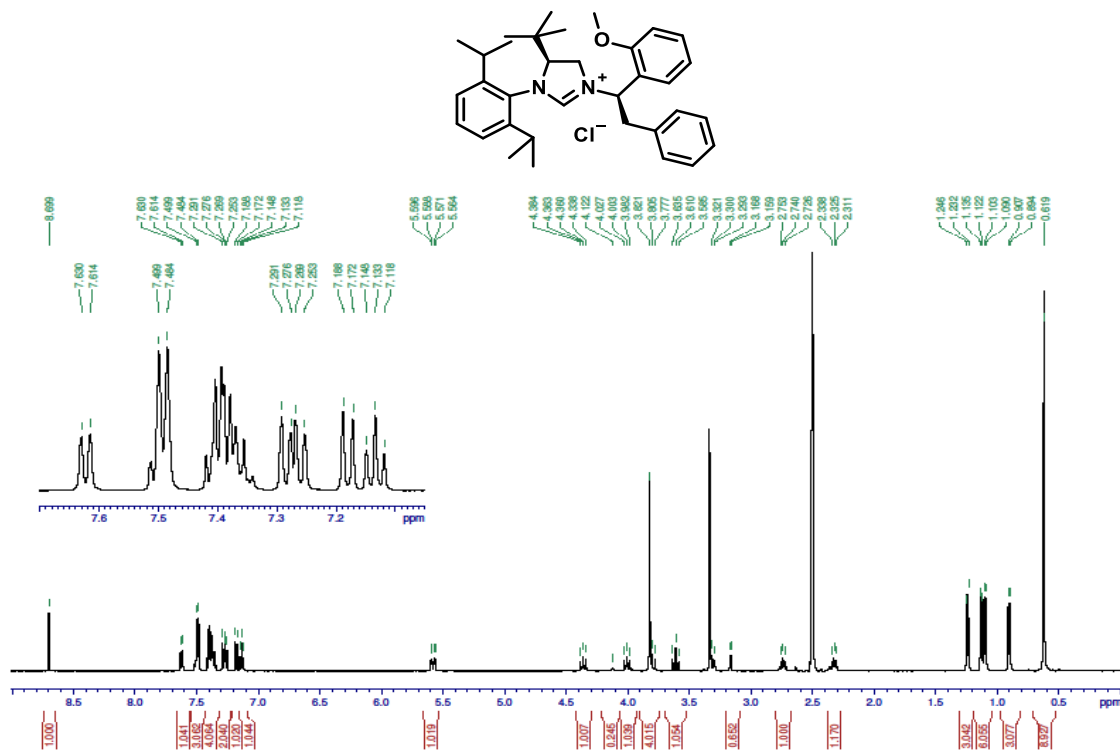

**(5*S*,1'*S*)-5-*tert*-butyl-1-(2,6-di(*propan*-2-yl)phenyl)-3-[1-(3-methoxyphenyl)-2-phenylethyl]-4,5-dihydro-1*H*-imidazol-3-ium chloride [(5*S*,1'*S*)-9a]**

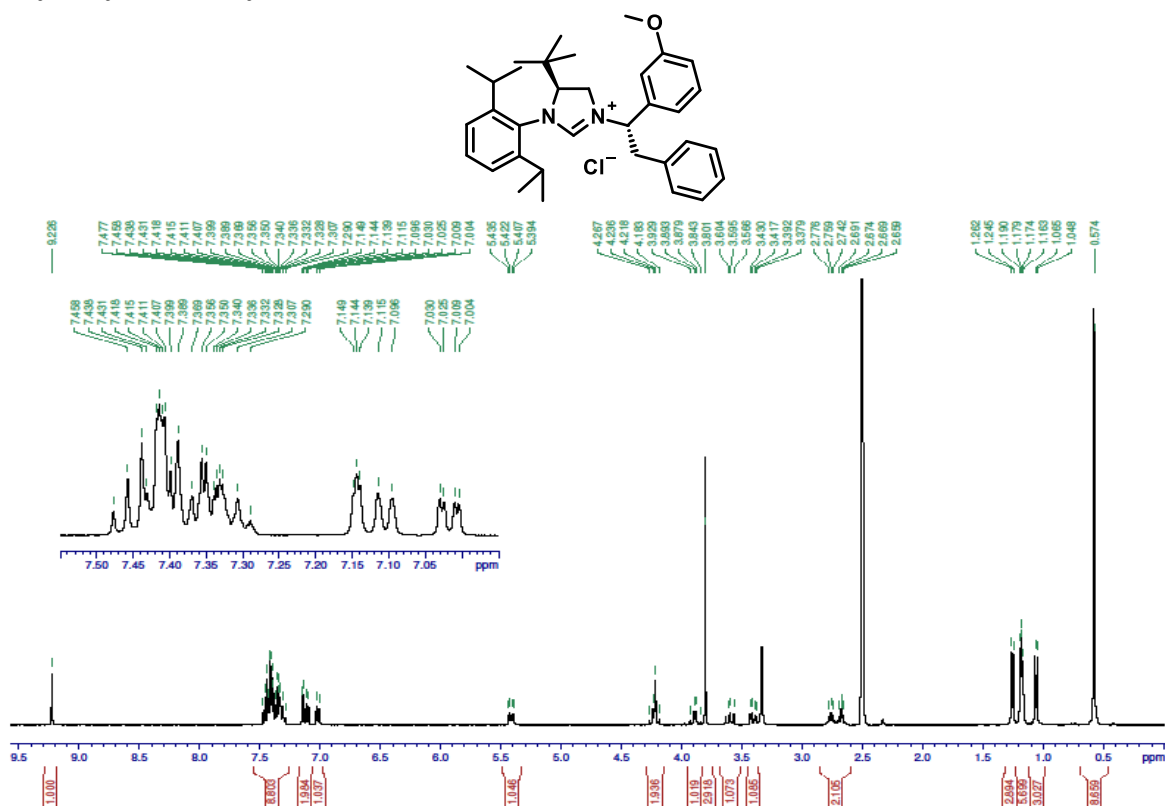

**Figure S17.** <sup>1</sup>H NMR (400 MHz) spectrum of **9a** in DMSO-*d*<sub>6</sub>

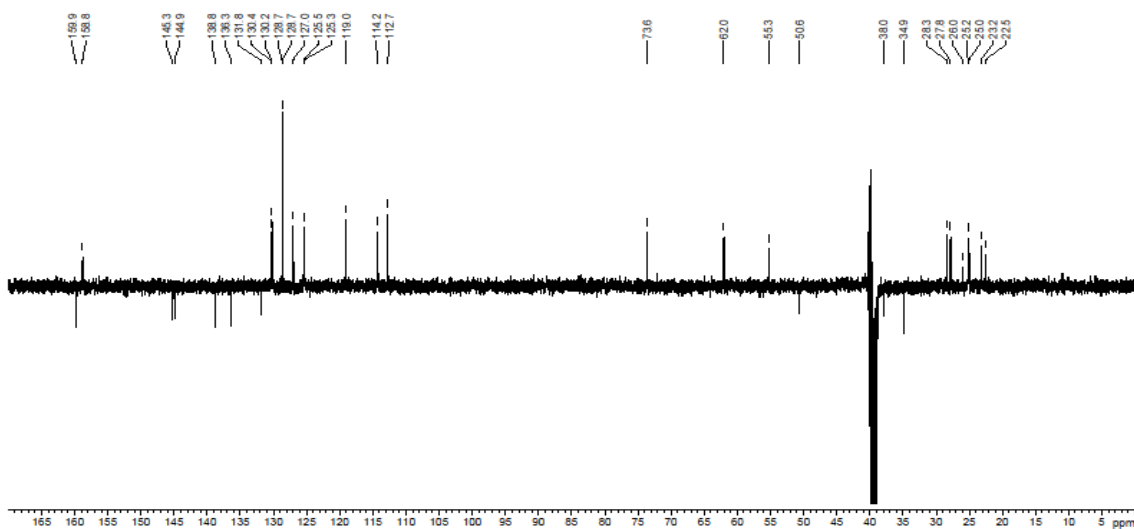

**Figure S18.** <sup>13</sup>C NMR (100 MHz) spectrum of **9a** in DMSO-*d*<sub>6</sub>

**(5*S*,1'*R*)-5-*tert*-butyl-1-(2,6-di(propan-2-yl)phenyl)-3-[1-(3-methoxyphenyl)-2-phenylethyl]-4,5-dihydro-1*H*-imidazol-3-ium chloride [(5*S*,1'*R*)-9b]**

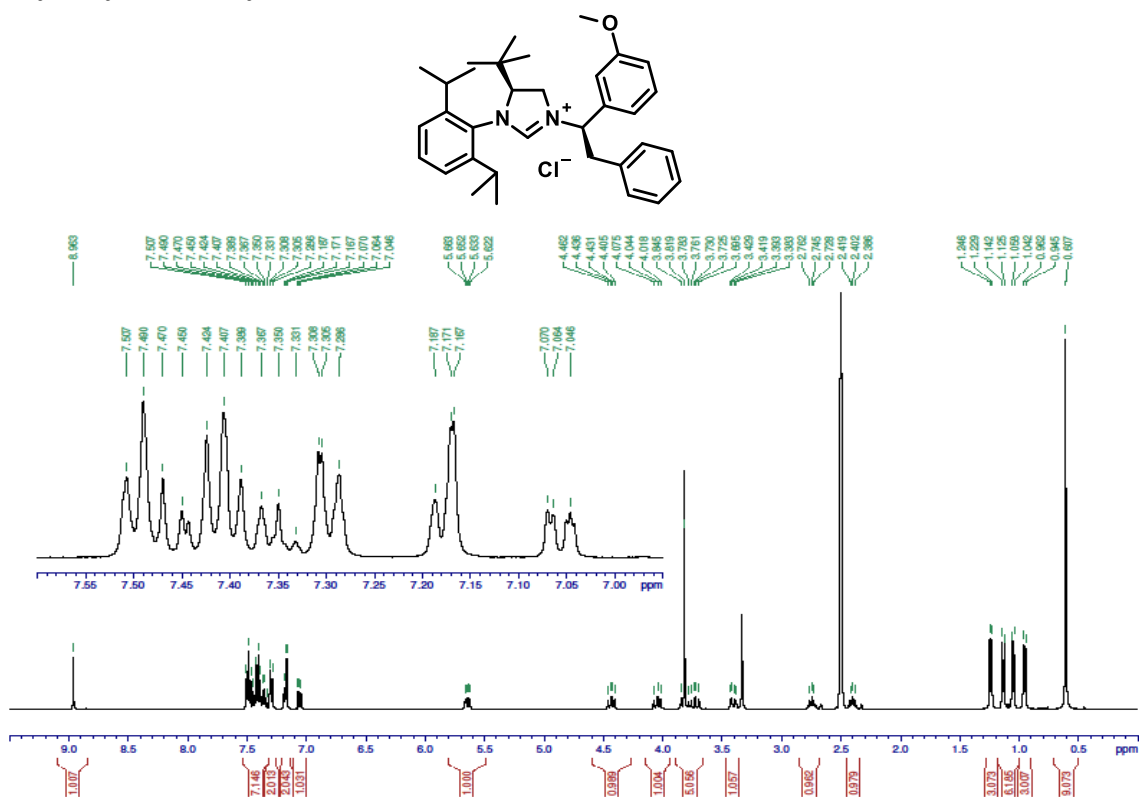

**Figure S19.** <sup>1</sup>H NMR (400 MHz) spectrum of **9b** in DMSO-*d*<sub>6</sub>

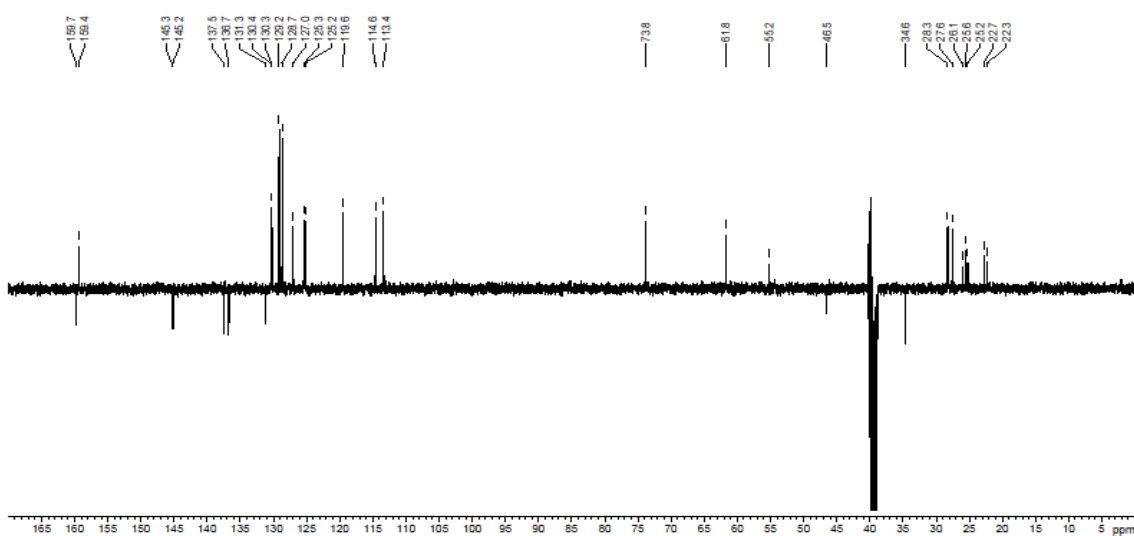

**Figure S20.** <sup>13</sup>C NMR (100 MHz) spectrum of **9b** in DMSO-*d*<sub>6</sub>

**(5*S*,1'*R*)-5-*tert*-butyl-1-(2,6-di(propan-2-yl)phenyl)-3-[1-(4-methoxyphenyl)-2-phenylethyl]-4,5-dihydro-1*H*-imidazol-3-ium chloride [(5*S*,1'*R*)-10a]**

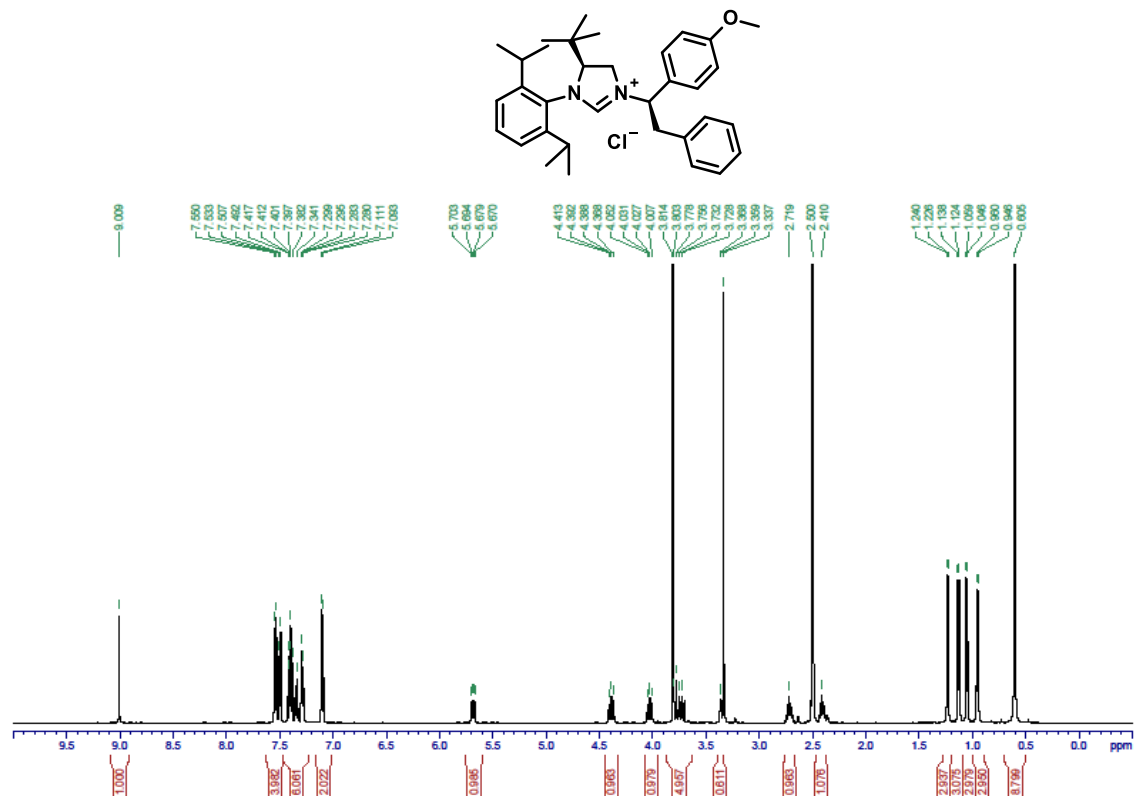

**Figure S21.** <sup>1</sup>H NMR (500 MHz) spectrum of **10a** in DMSO-*d*<sub>6</sub>

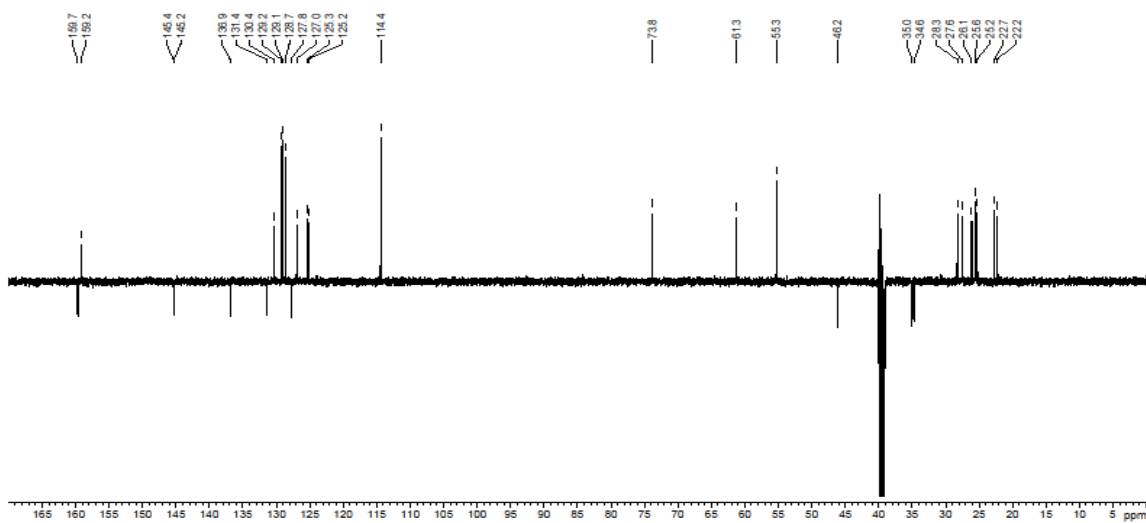

**Figure S22.** <sup>13</sup>C NMR (125 MHz) spectrum of **10a** in DMSO-*d*<sub>6</sub>

**(5*S*,1'*S*)-5-*tert*-butyl-1-(2,6-di(propan-2-yl)phenyl)-3-[1-(4-methoxyphenyl)-2-phenylethyl]-4,5-dihydro-1*H*-imidazol-3-ium chloride [(5*S*,1'*S*)-10b]**

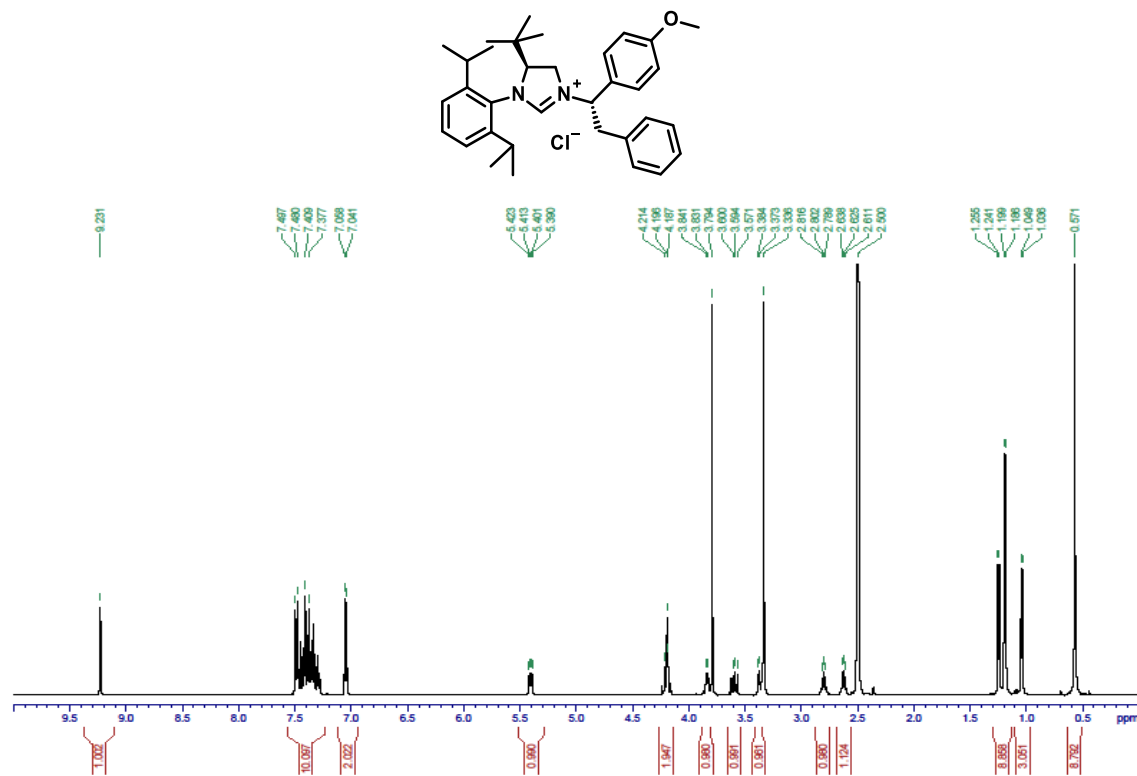

**Figure S23.** <sup>1</sup>H NMR (500 MHz) spectrum of **10b** in DMSO-*d*<sub>6</sub>

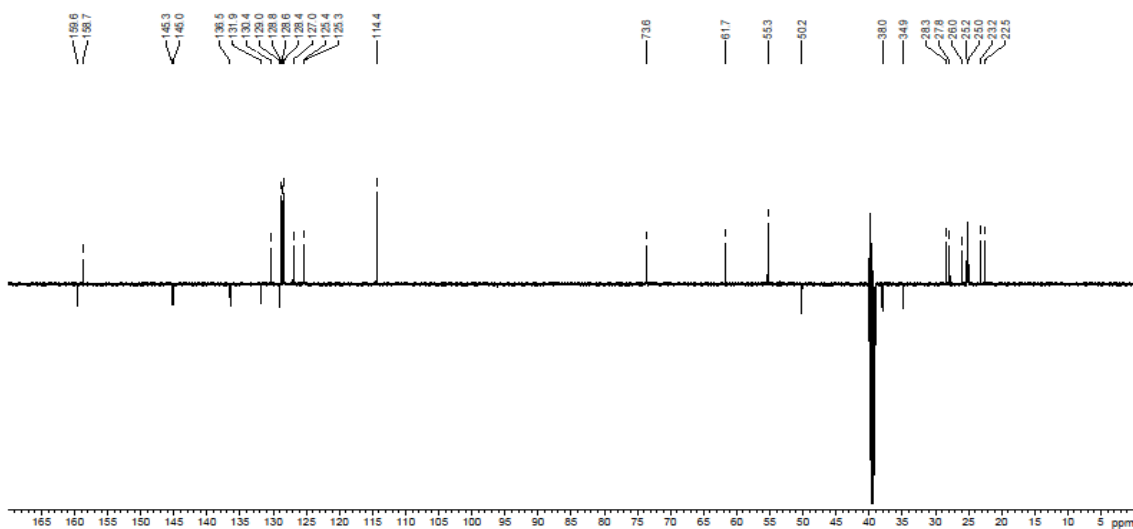

**Figure S24.** <sup>13</sup>C NMR (125 MHz) spectrum of **10b** in DMSO-*d*<sub>6</sub>

**(5*S*,1'*S*)-5-*tert*-butyl-1-(2,6-di(*propan*-2-yl)phenyl)-3-[1-(*o*-tolyl)-2-phenylethyl]-4,5-dihydro-1*H*-imidazol-3-ium chloride [(5*S*,1'*S*)-11a]**

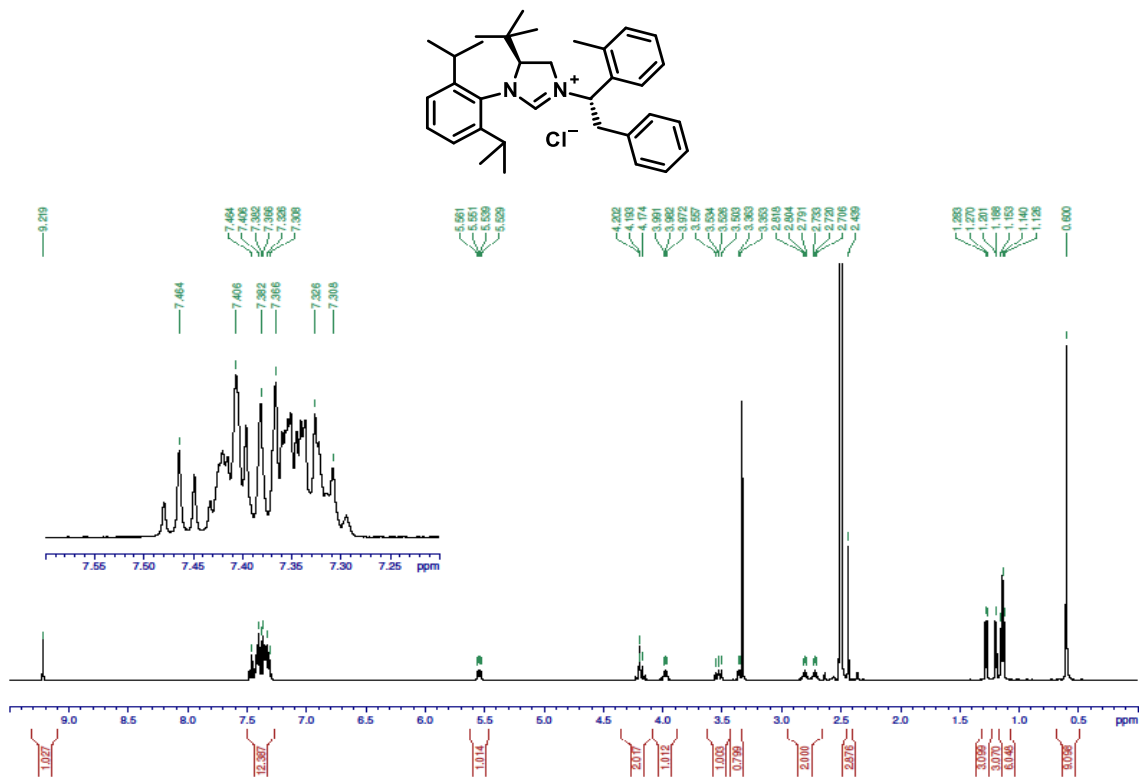

**Figure S25.** <sup>1</sup>H NMR (500 MHz) spectrum of **11a** in DMSO-*d*<sub>6</sub>

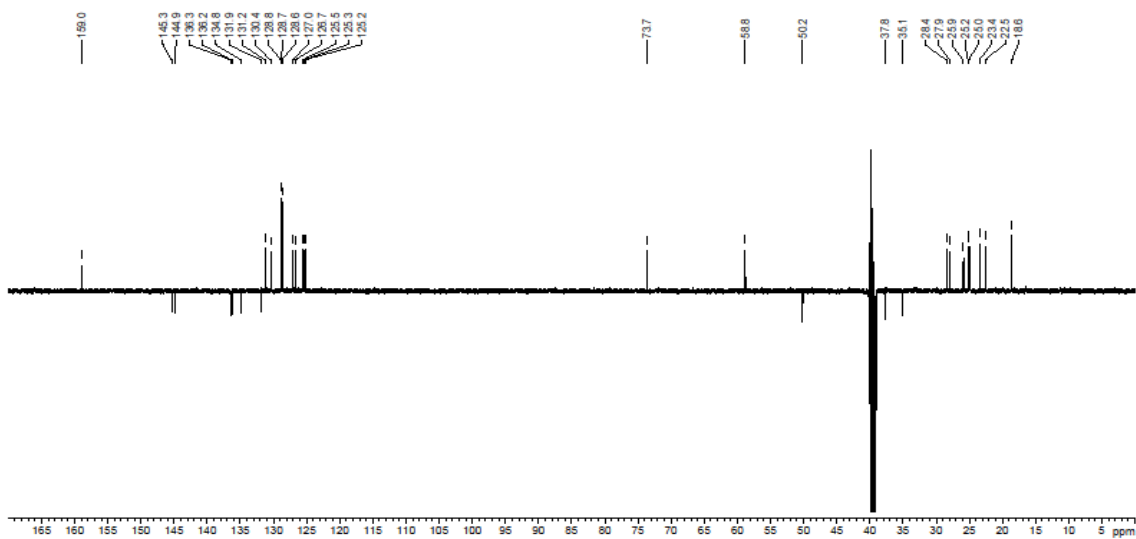

**Figure S26.** <sup>13</sup>C NMR (125 MHz) spectrum of **11a** in DMSO-*d*<sub>6</sub>

**(5*S*,1'*R*)-5-*tert*-butyl-1-(2,6-di(*propan*-2-yl)phenyl)-3-[1-(*o*-tolyl)-2-phenylethyl]-4,5-dihydro-1*H*-imidazol-3-ium chloride [(5*S*,1'*R*)-11b]**

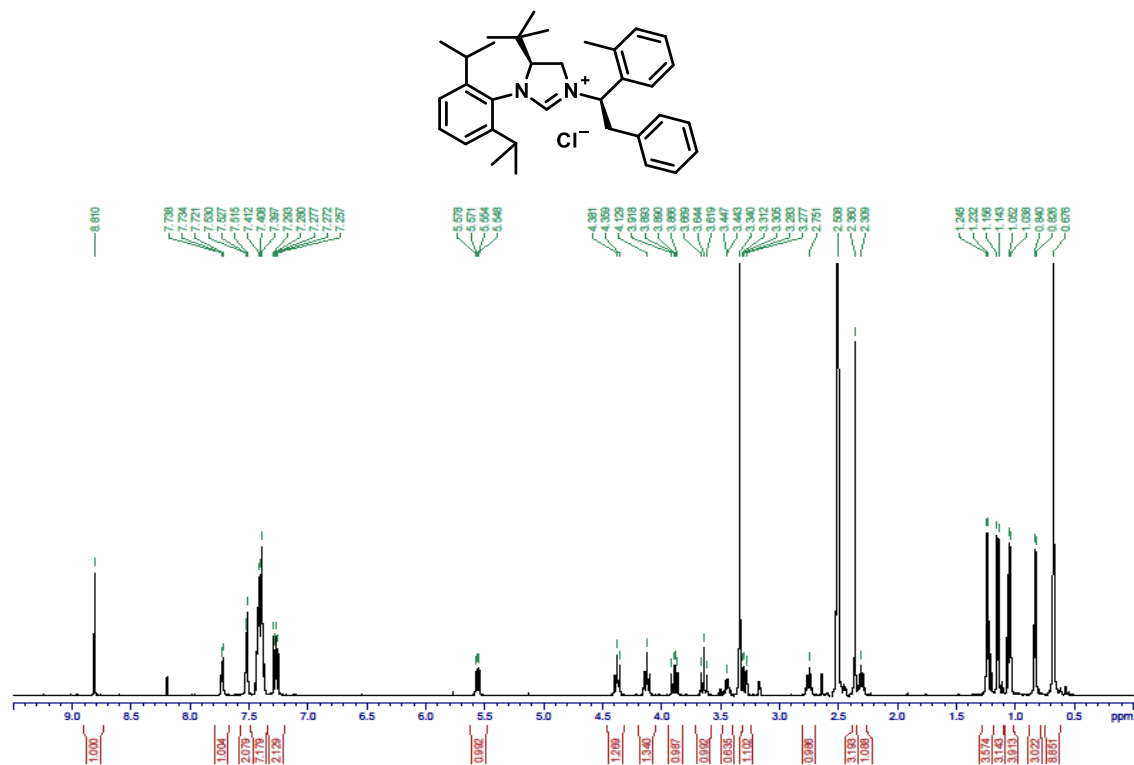

**Figure S27.** <sup>1</sup>H NMR (500 MHz) spectrum of **11b** in DMSO-*d*<sub>6</sub>

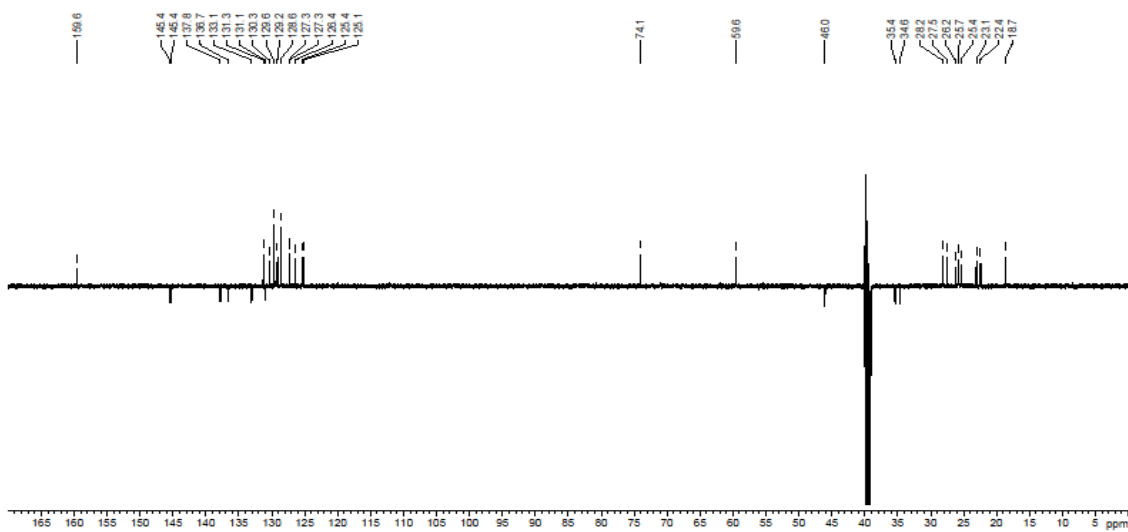

**Figure S28.** <sup>13</sup>C NMR (125 MHz) spectrum of **11b** in DMSO-*d*<sub>6</sub>

**(5*S*,1'*R*)-5-*tert*-butyl-1-(2,6-di(propan-2-yl)phenyl)-3-[2-phenyl-1-(*p*-tolyl)ethyl]-4,5-dihydro-1*H*-imidazol-3-ium chloride [(5*S*,1'*R*)-12a]**

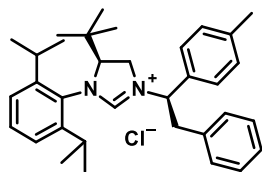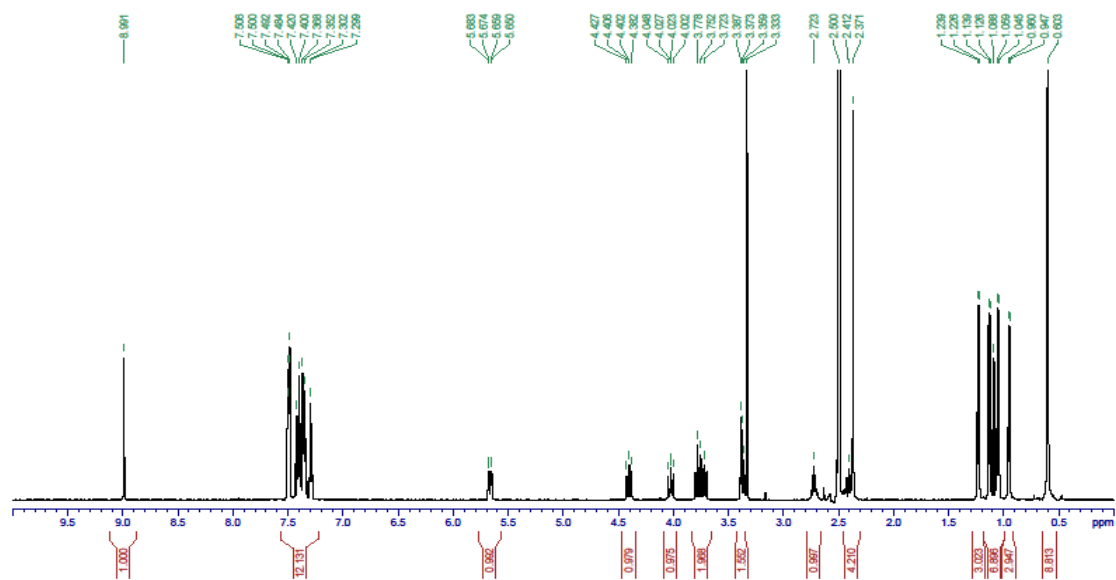

**Figure S29.**  $^1\text{H}$  NMR (500 MHz) spectrum of **12a** in  $\text{DMSO-}d_6$

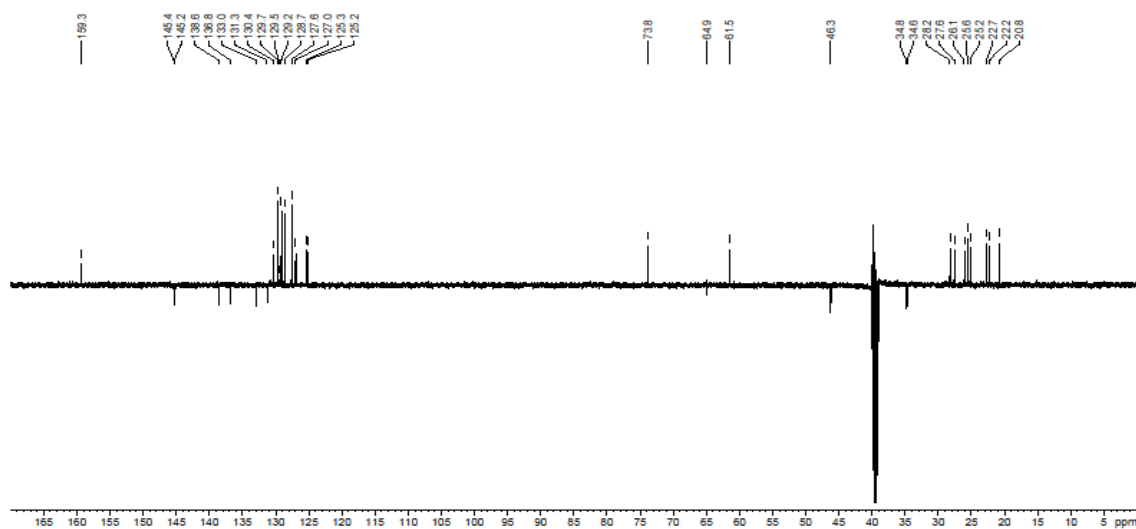

**Figure S30.**  $^{13}\text{C}$  NMR (125 MHz) spectrum of **12a** in  $\text{DMSO-}d_6$



**(5*S*,1'*S*)-5-*tert*-butyl-1-(2,6-di(propan-2-yl)phenyl)-3-[2-phenyl-1-(*p*-tolyl)ethyl]-4,5-dihydro-1*H*-imidazol-3-ium chloride [(5*S*,1'*S*)-12b]**

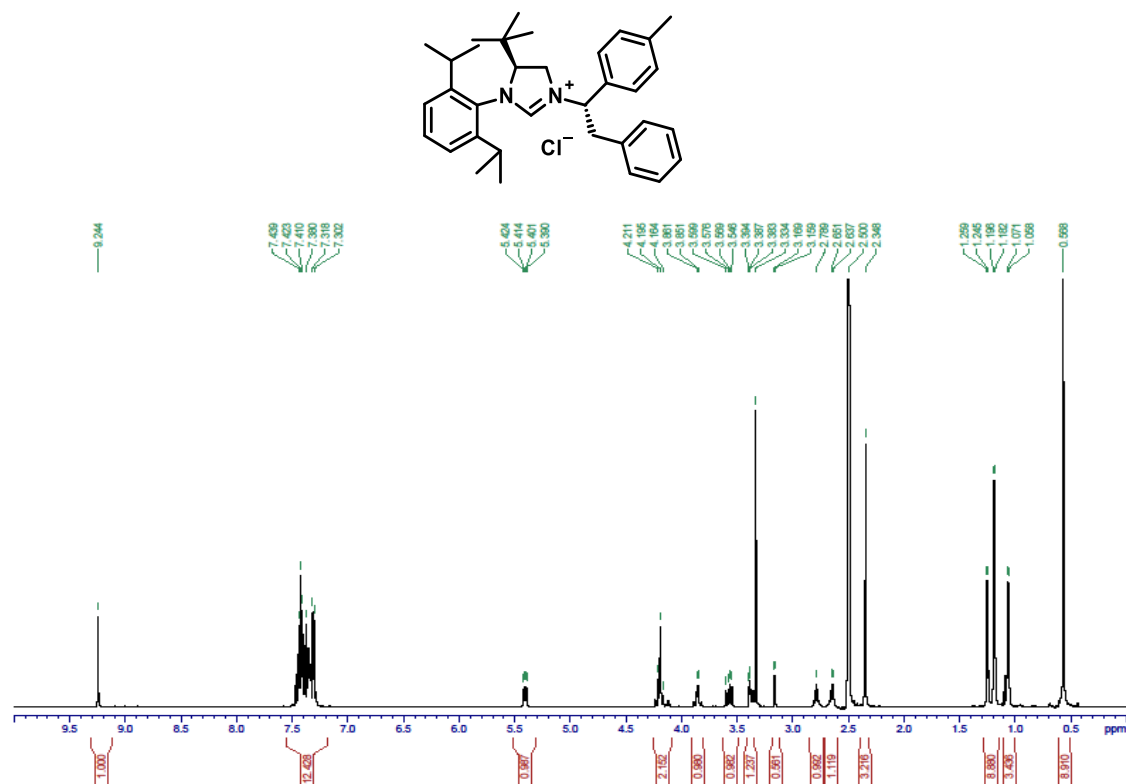

**Figure S31.** <sup>1</sup>H NMR (500 MHz) spectrum of **12b** in DMSO-*d*<sub>6</sub>

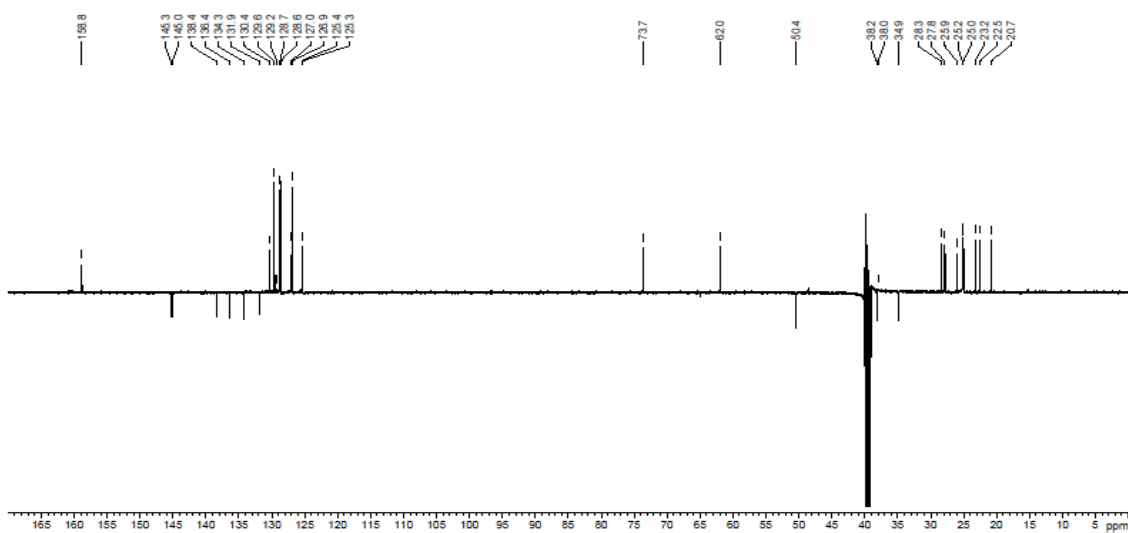

**Figure S32.** <sup>13</sup>C NMR (125 MHz) spectrum of **12b** in DMSO-*d*<sub>6</sub>

**(5*S*,1'*R*)-5-*tert*-butyl-1-(2,6-di(*propan*-2-yl)phenyl)-3-[2-phenyl-1-[4-(trifluoromethyl)phenyl]ethyl]-4,5-dihydro-1*H*-imidazol-3-ium chloride [(5*S*,1'*R*)-13a]**

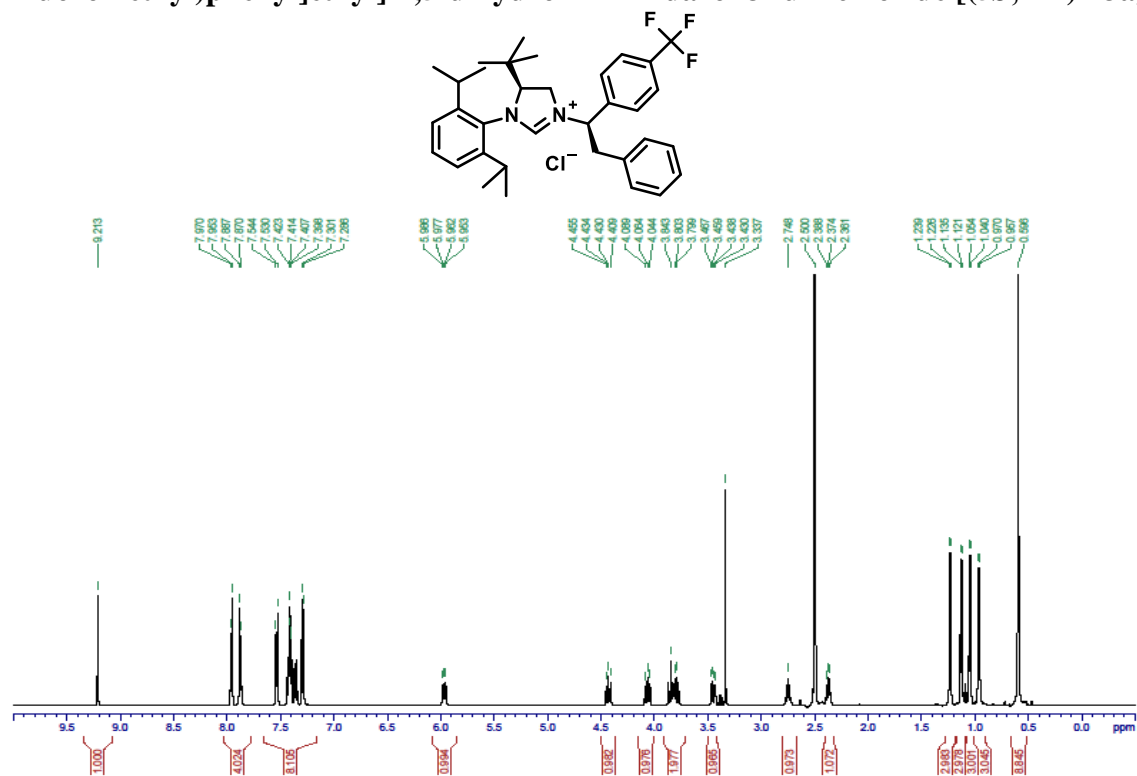

**Figure S33.**  $^1\text{H}$  NMR (500 MHz) spectrum of **13a** in  $\text{DMSO}-d_6$

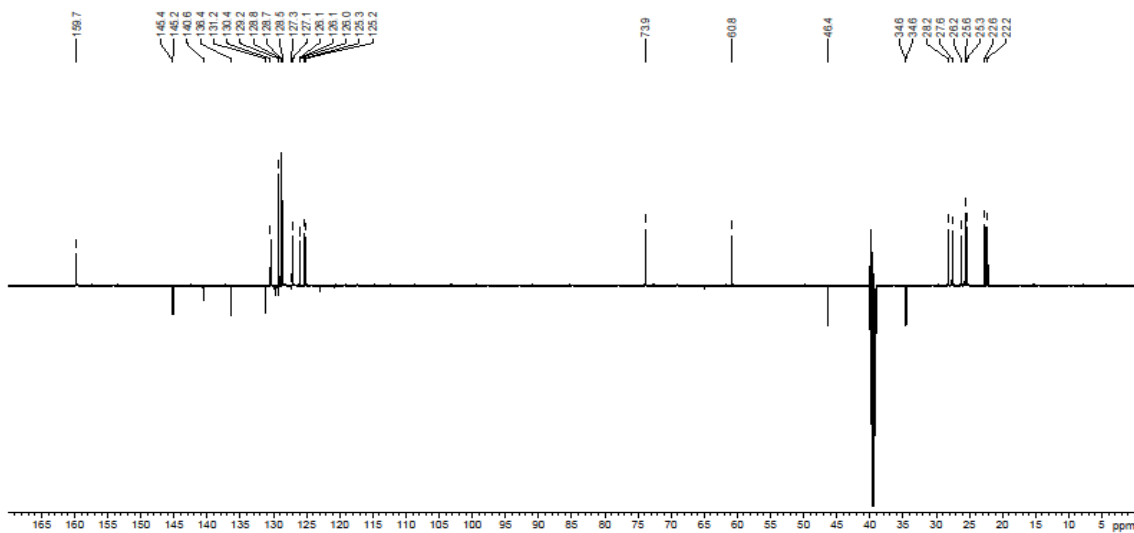

**Figure S34.**  $^{13}\text{C}$  NMR (125 MHz) spectrum of **13a** in  $\text{DMSO}-d_6$

**(5*S*,1'*S*)-5-*tert*-butyl-1-(2,6-di(propan-2-yl)phenyl)-3-[2-phenyl-1-[4-(trifluoromethyl)phenyl]ethyl]-4,5-dihydro-1*H*-imidazol-3-ium chloride [(5*S*,1'*S*)-13b]**

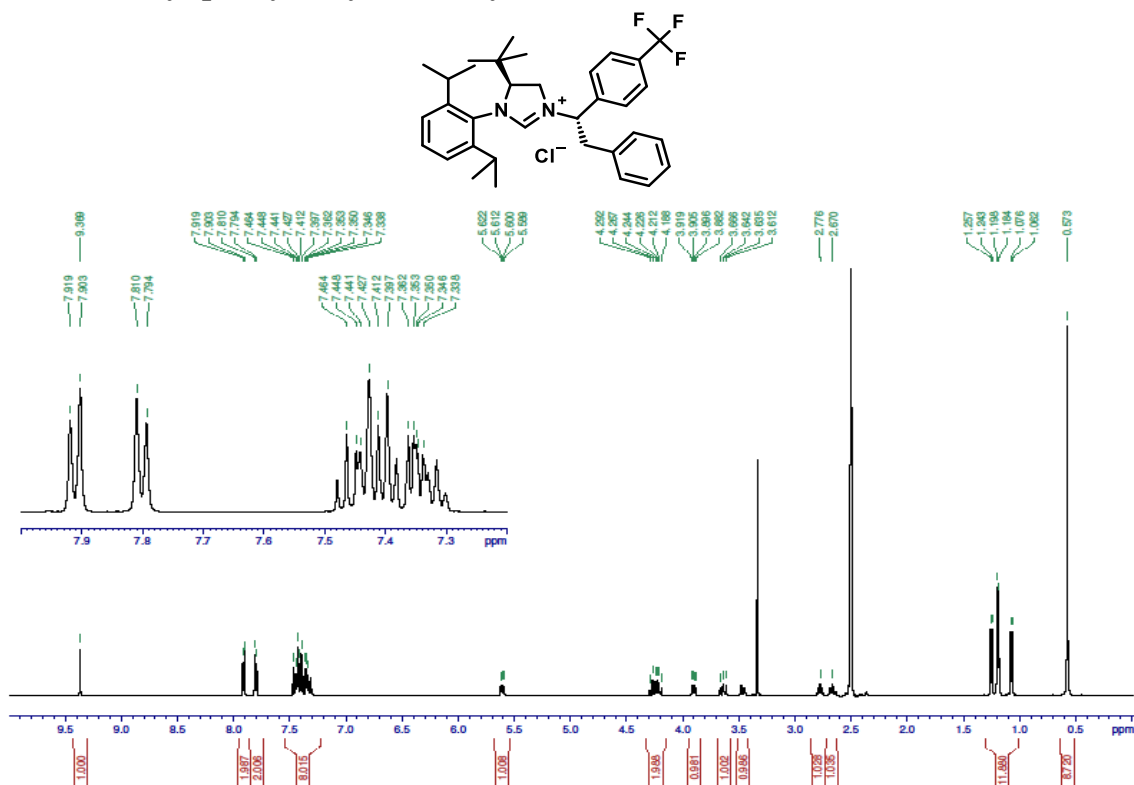

**Figure S35.** <sup>1</sup>H NMR (500 MHz) spectrum of **13b** in DMSO-*d*<sub>6</sub>

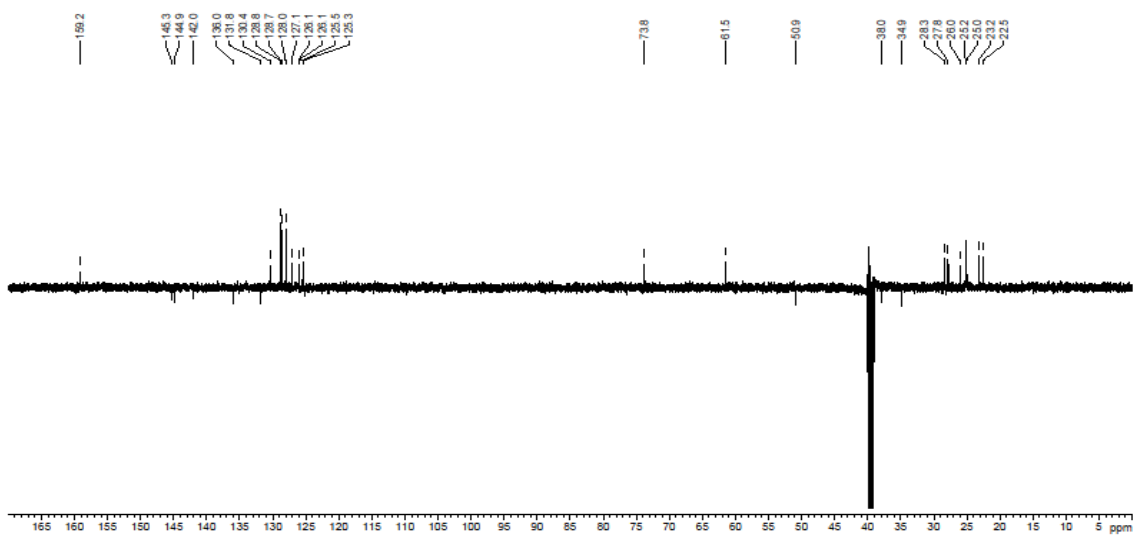

**Figure S36.** <sup>13</sup>C NMR (125 MHz) spectrum of **13b** in DMSO-*d*<sub>6</sub>

**(5*S*,1'*S*)-5-*tert*-butyl-1-(2,6-di(propan-2-yl)phenyl)-3-[1-phenyl-2-(*p*-tolyl)ethyl]-4,5-dihydro-1*H*-imidazol-3-ium chloride [(5*S*,1'*S*)-14a]**

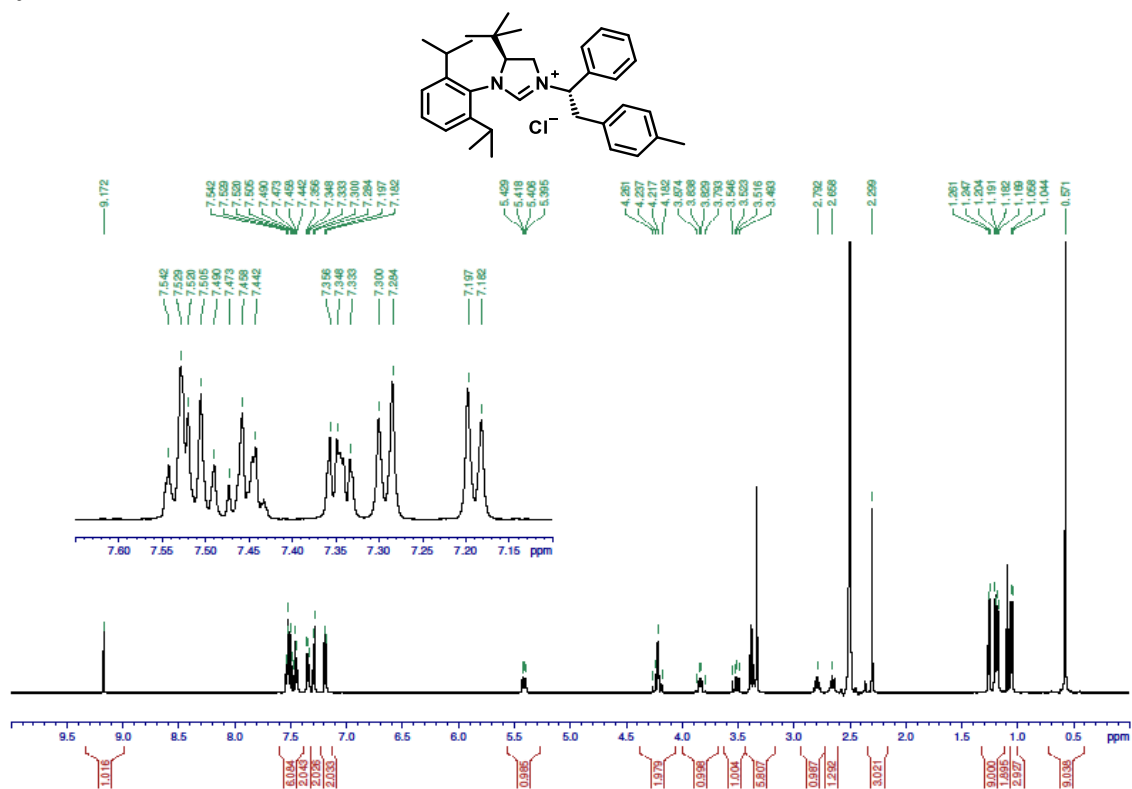

**Figure S37.** <sup>1</sup>H NMR (500 MHz) spectrum of **14a** in DMSO-*d*<sub>6</sub>

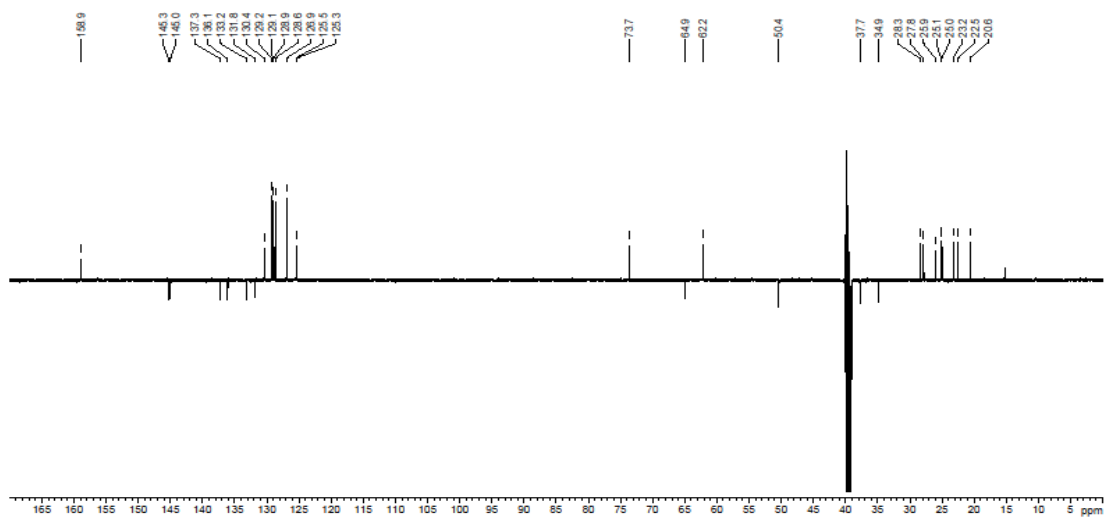

**Figure S38.** <sup>13</sup>C NMR (125 MHz) spectrum of **14a** in DMSO-*d*<sub>6</sub>

**(5*S*,1'*R*)-5-*tert*-butyl-1-(2,6-di(propan-2-yl)phenyl)-3-[1-phenyl-2-(*p*-tolyl)ethyl]-4,5-dihydro-1*H*-imidazol-3-ium chloride [(5*S*,1'*R*)-14b]**

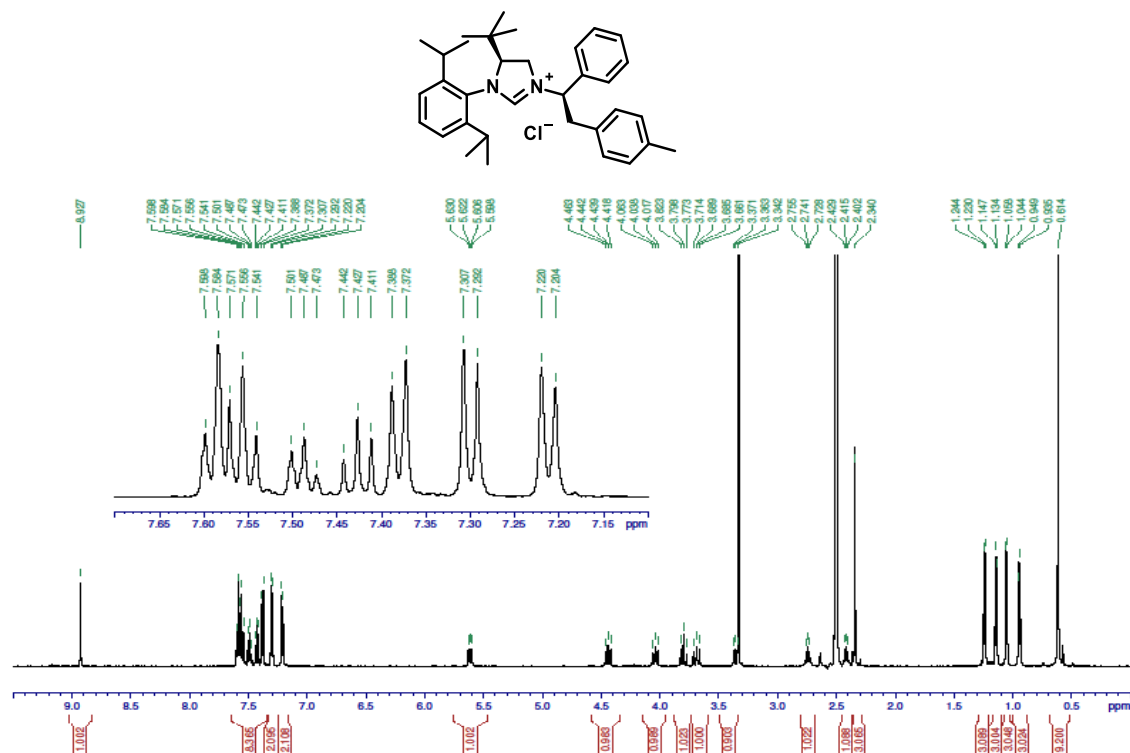

**Figure S39.** <sup>1</sup>H NMR (500 MHz) spectrum of **14b** in DMSO-*d*<sub>6</sub>

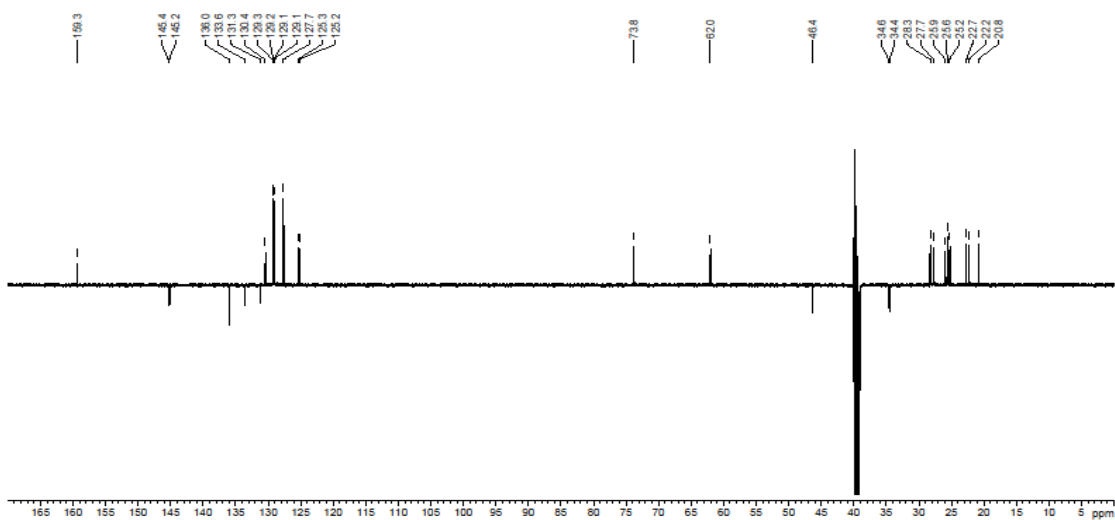

**Figure S40.** <sup>13</sup>C NMR (125 MHz) spectrum of **14b** in DMSO-*d*<sub>6</sub>

**(5*S*,1'*S*)-5-*tert*-butyl-3-[2-(4-chlorophenyl)-1-phenylethyl]-1-(2,6-di(propan-2-yl)phenyl)-4,5-dihydro-1*H*-imidazol-3-ium chloride [(5*S*,1'*S*)-15a]**

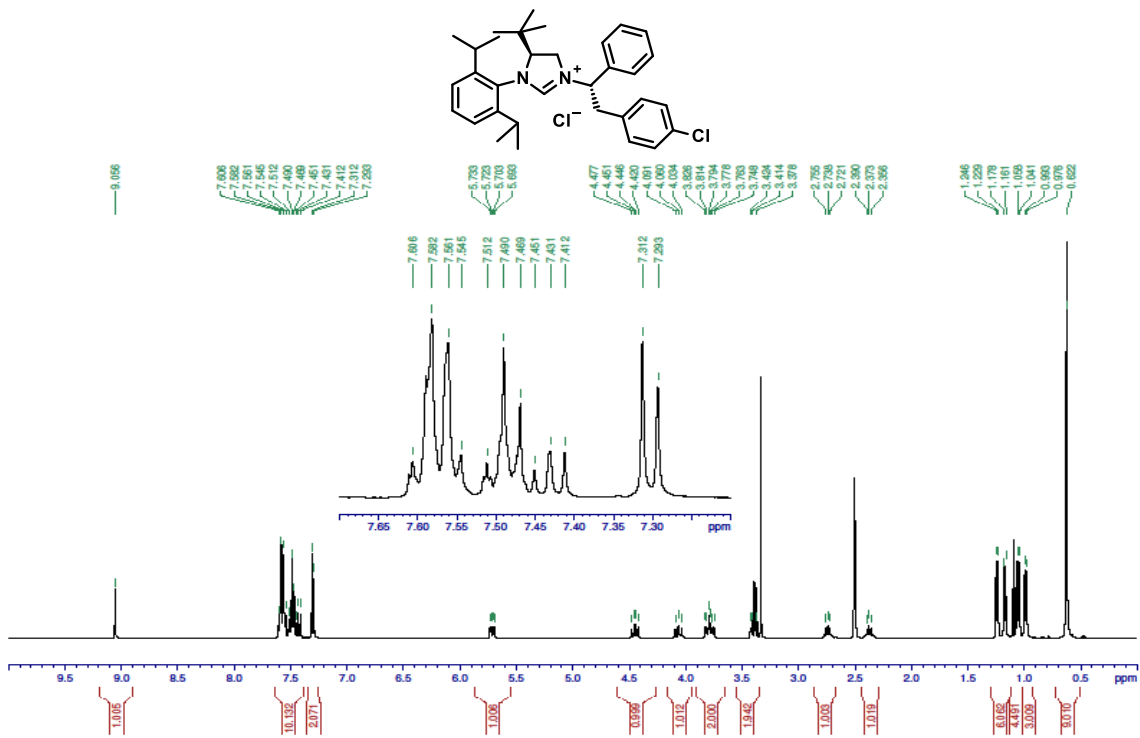

**Figure S41.**  $^1\text{H}$  NMR (400 MHz) spectrum of **15a** in  $\text{DMSO}-d_6$

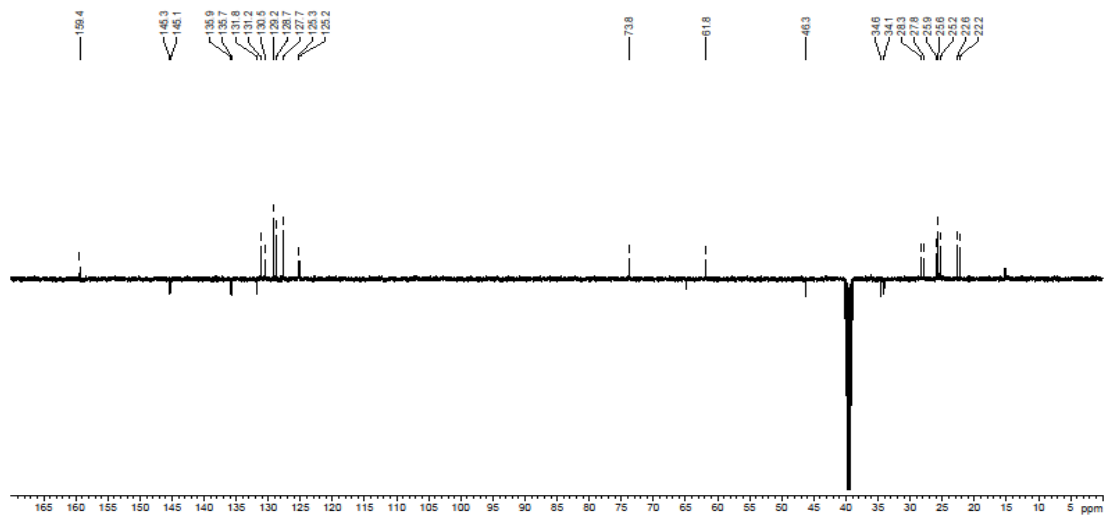

**Figure S42.**  $^{13}\text{C}$  NMR (100 MHz) spectrum of **15a** in DMSO- $d_6$

**(5*S*,1'*R*)-5-*tert*-butyl-3-[2-(4-chlorophenyl)-1-phenylethyl]-1-(2,6-di(propan-2-yl)phenyl)-4,5-dihydro-1*H*-imidazol-3-ium chloride [(5*S*,1'*R*)-15b]**

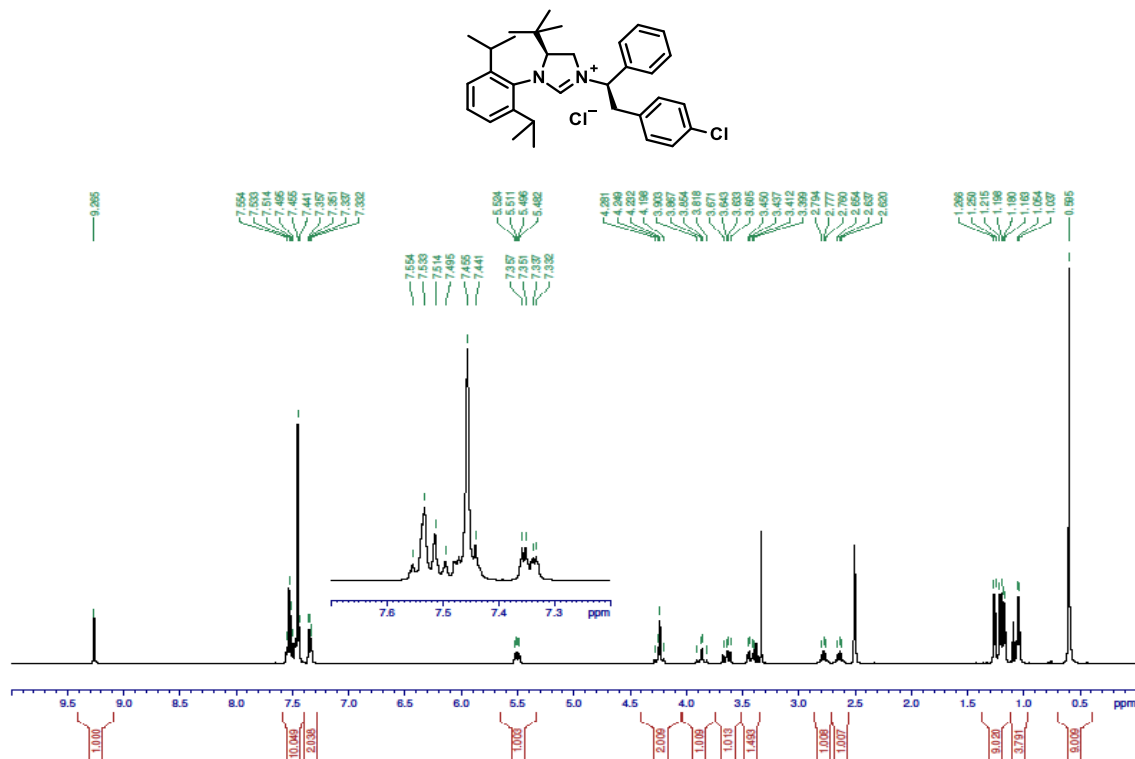

**Figure S43.** <sup>1</sup>H NMR (400 MHz) spectrum of **15b** in DMSO-*d*<sub>6</sub>

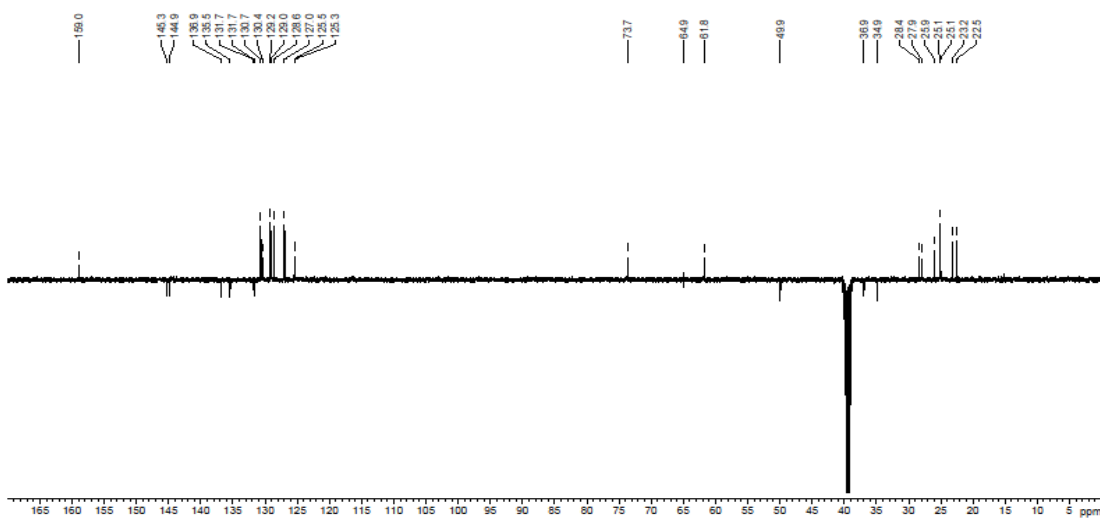

**Figure S44.** <sup>13</sup>C NMR (100 MHz) spectrum of **15b** in DMSO-*d*<sub>6</sub>

**(5*S*,1'*S*)-5-*tert*-butyl-3-[2-(2-chlorophenyl)-1-phenylethyl]-1-(2,6-di(*propan*-2-yl)phenyl)-4,5-dihydro-1*H*-imidazol-3-ium chloride [(5*S*,1'*S*)-16a]**

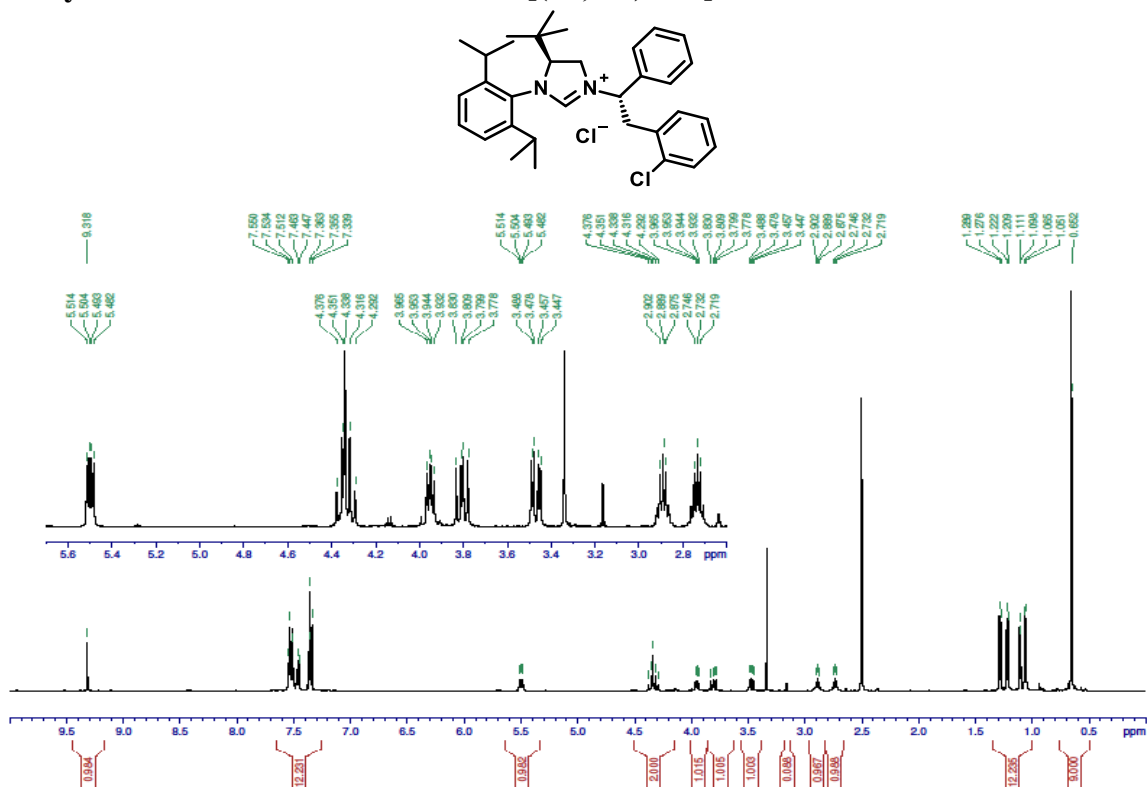

**Figure S45.** <sup>1</sup>H NMR (500 MHz) spectrum of **16a** in DMSO-*d*<sub>6</sub>

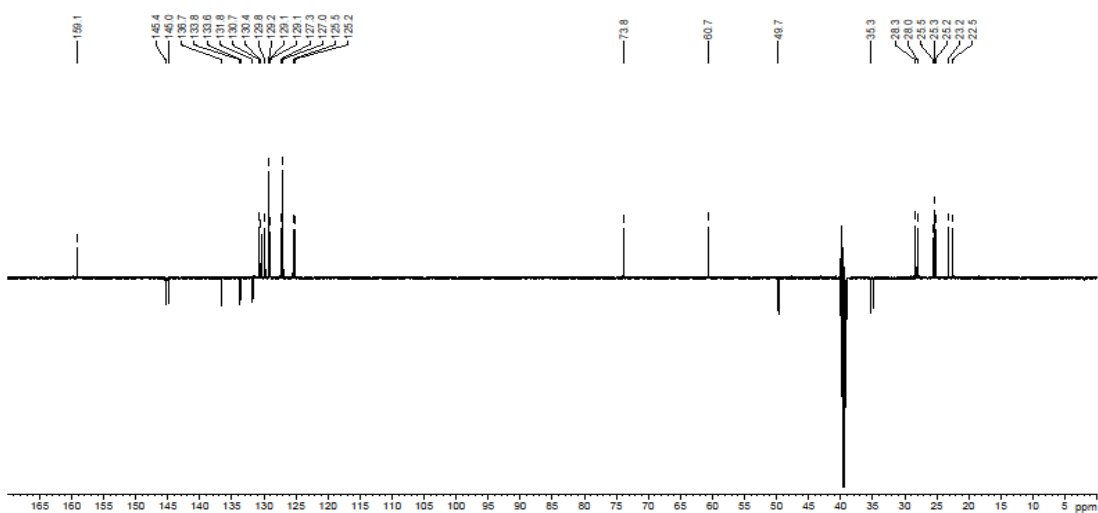

**Figure S46.** <sup>13</sup>C NMR (125 MHz) spectrum of **16a** in DMSO-*d*<sub>6</sub>



**(5*S*,1'*R*)-5-*tert*-butyl-3-[2-(2-chlorophenyl)-1-phenylethyl]-1-(2,6-di(propan-2-yl)phenyl)-4,5-dihydro-1*H*-imidazol-3-ium chloride [(5*S*,1'*R*)-16b]**

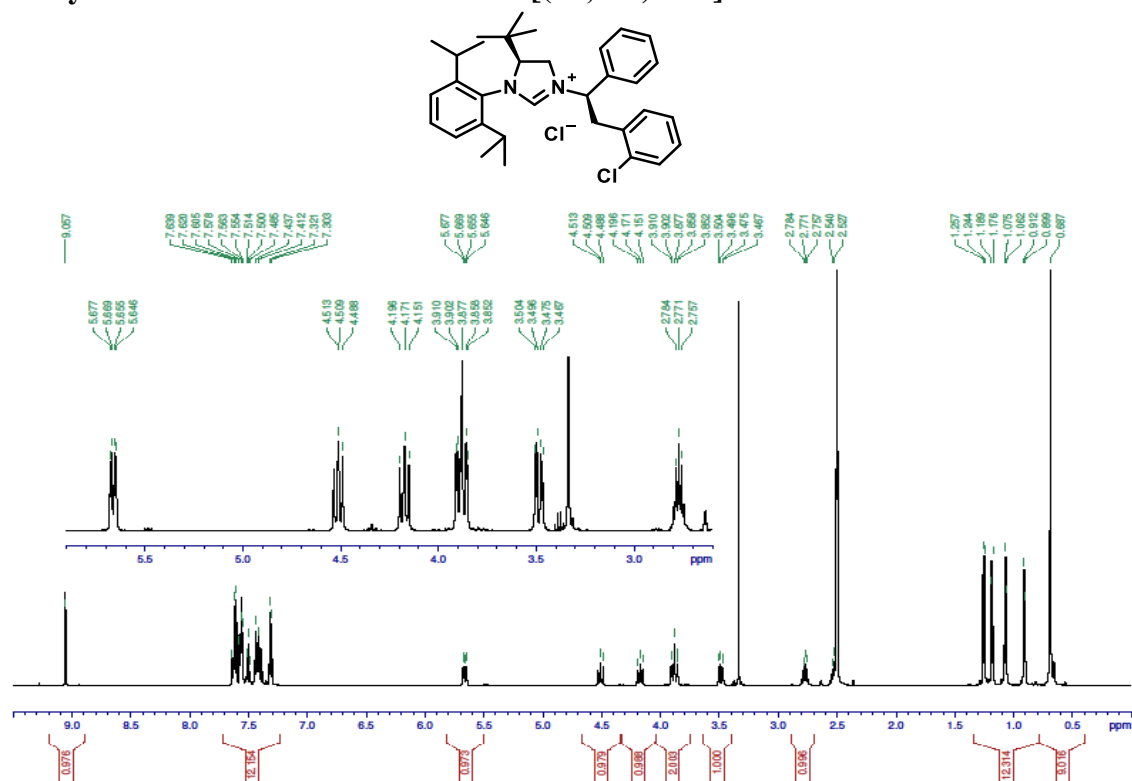

**Figure S47.** <sup>1</sup>H NMR (500 MHz) spectrum of **16b** in DMSO-*d*<sub>6</sub>

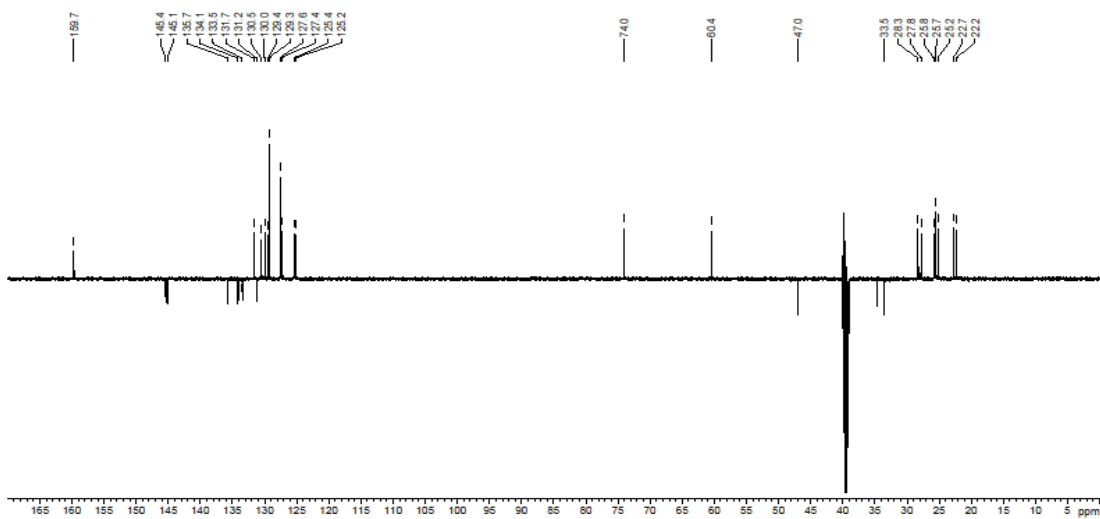

**Figure S48.** <sup>13</sup>C NMR (125 MHz) spectrum of **16b** in DMSO-*d*<sub>6</sub>

**(1'S)-3-[2-(4-chlorophenyl)-1-phenylethyl]-1-(2,6-di(propan-2-yl)phenyl)-4,5-dihydro-1H-imidazol-3-ium chloride [(1'S)-17a]**

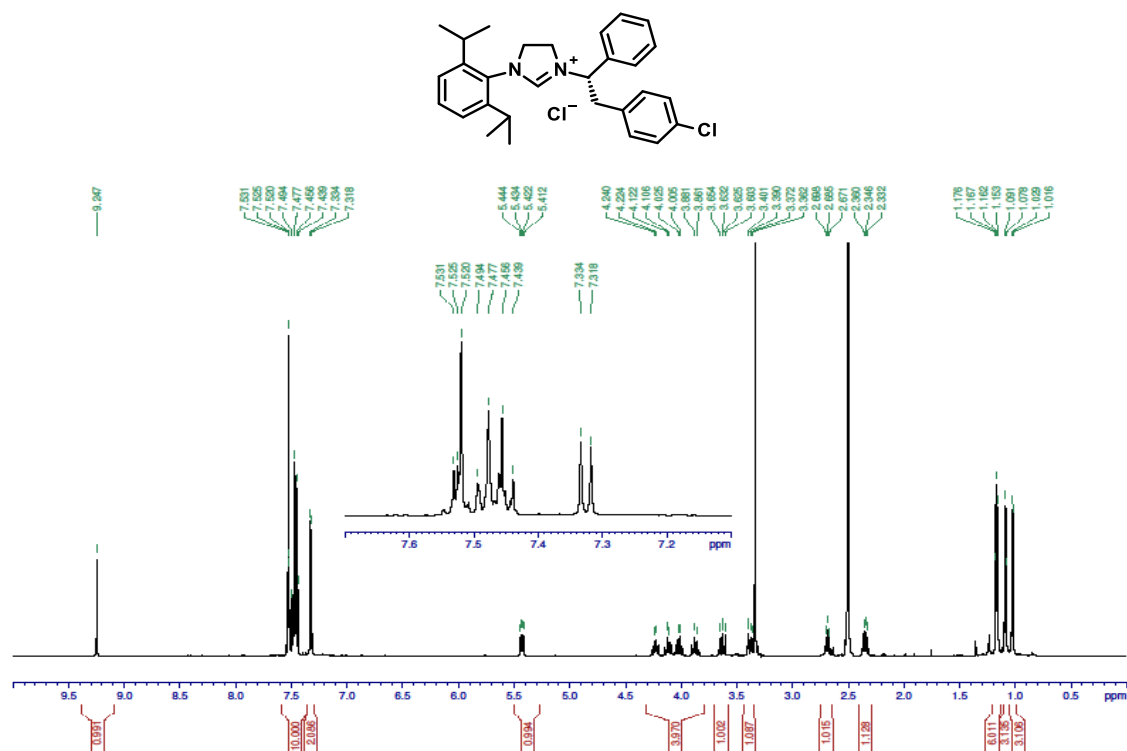

**Figure S49.** <sup>1</sup>H NMR (500 MHz) spectrum of **17a** in DMSO-*d*<sub>6</sub>

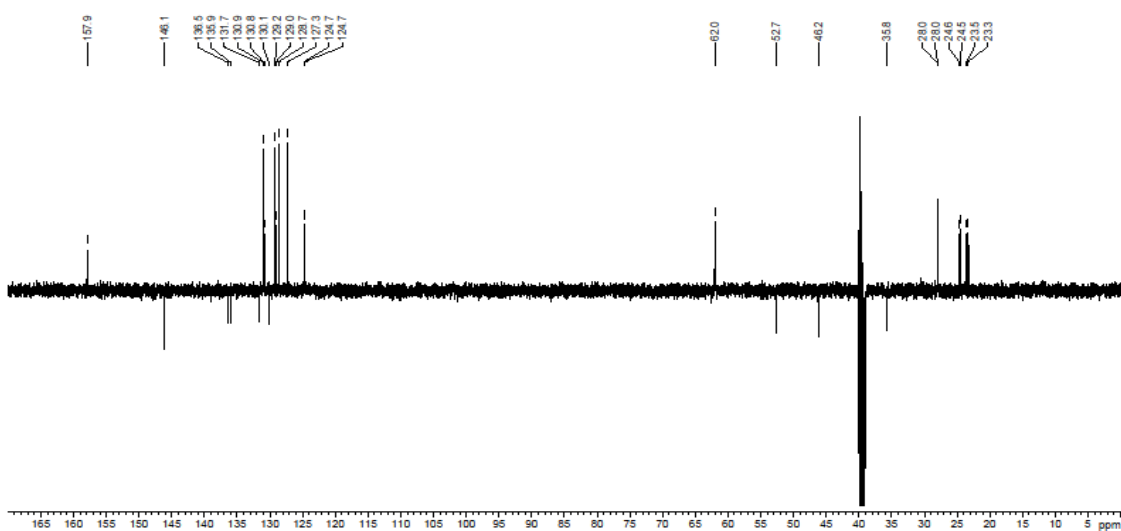

**Figure S50.** <sup>13</sup>C NMR (125 MHz) spectrum of **17a** in DMSO-*d*<sub>6</sub>

**(1'*R*)-3-[2-(4-chlorophenyl)-1-phenylethyl]-1-(2,6-di(propan-2-yl)phenyl)-4,5-dihydro-1*H*-imidazol-3-ium chloride [(1'*R*)-17b]**

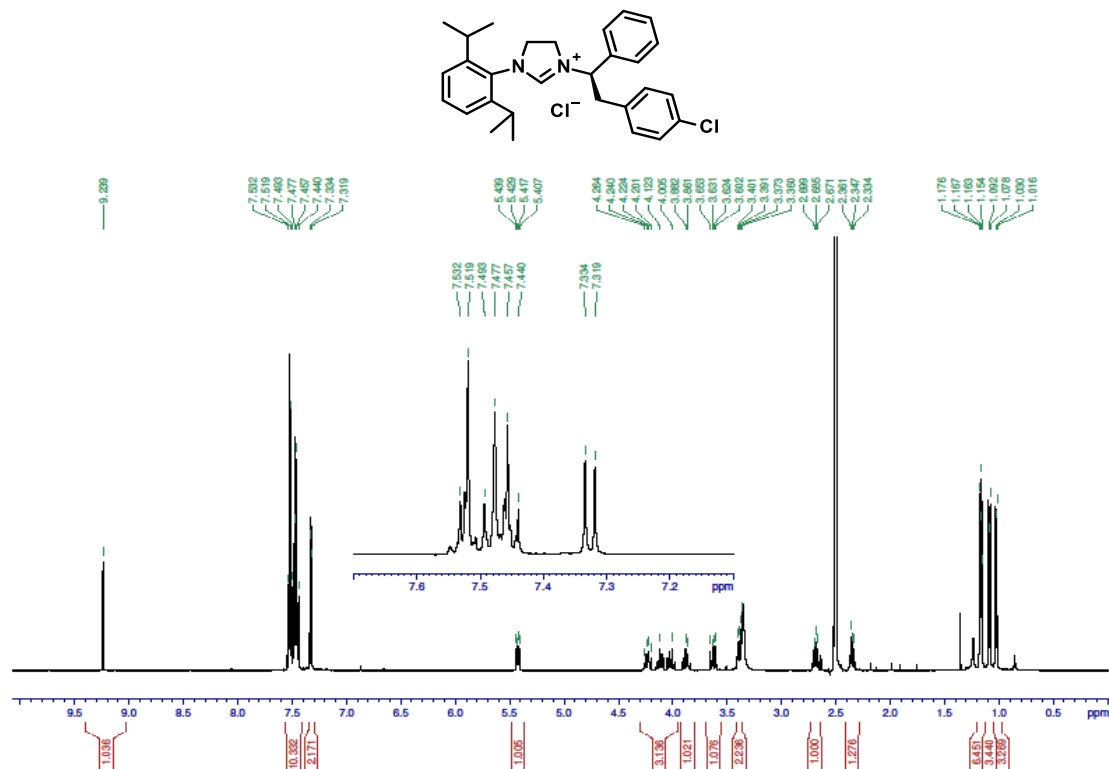

**Figure S51.** <sup>1</sup>H NMR (500 MHz) spectrum of **17b** in DMSO-*d*<sub>6</sub>

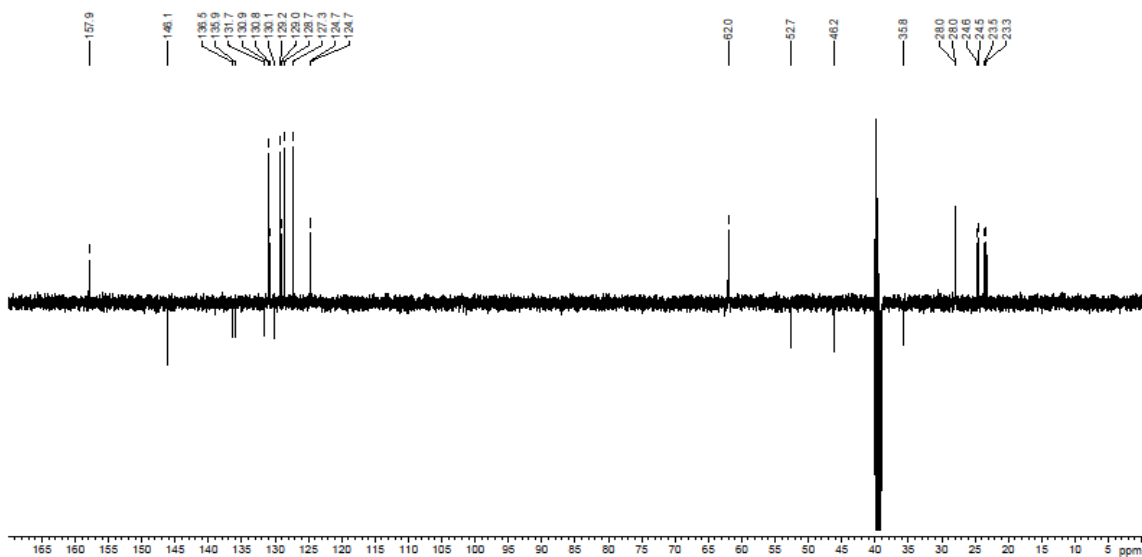

**Figure S52.** <sup>13</sup>C NMR (125 MHz) spectrum of **17b** in DMSO-*d*<sub>6</sub>

**(2*S*)-*N*-(2,6-di(propan-2-yl)phenyl)-3,3-dimethylbutane-1,2-diamine (19a)**

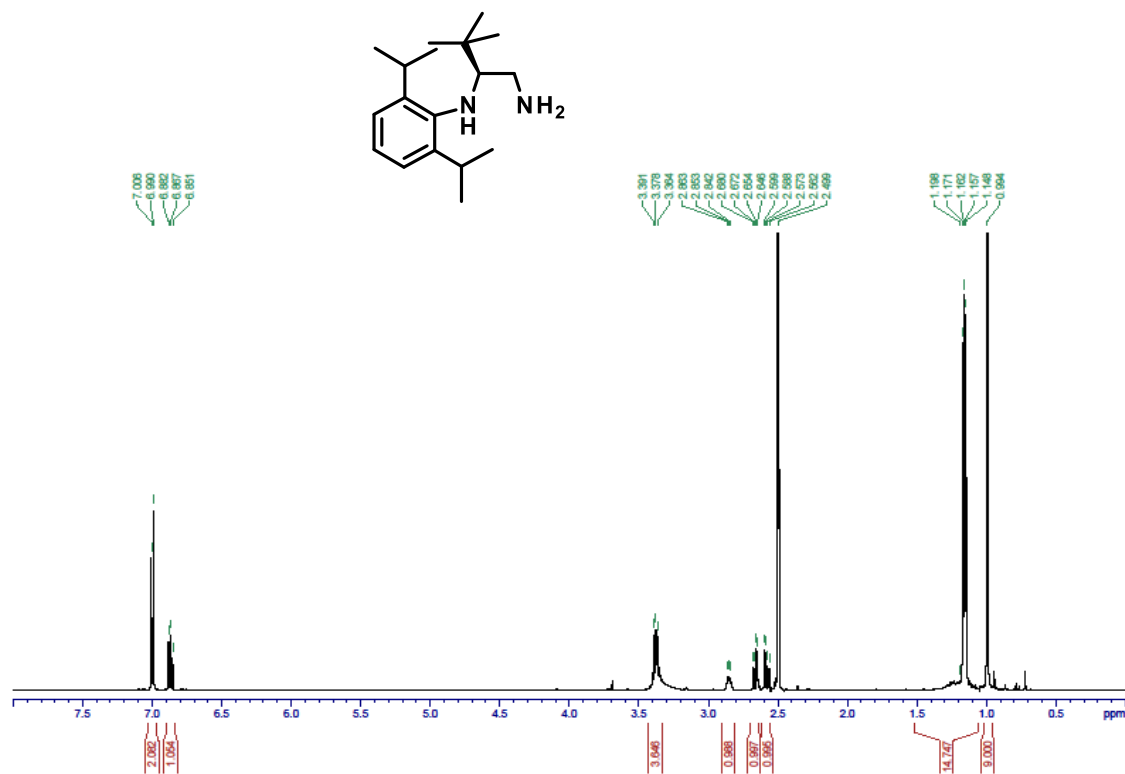

**Figure S53.** <sup>1</sup>H NMR (500 MHz) spectrum of **19a** in DMSO-*d*<sub>6</sub>

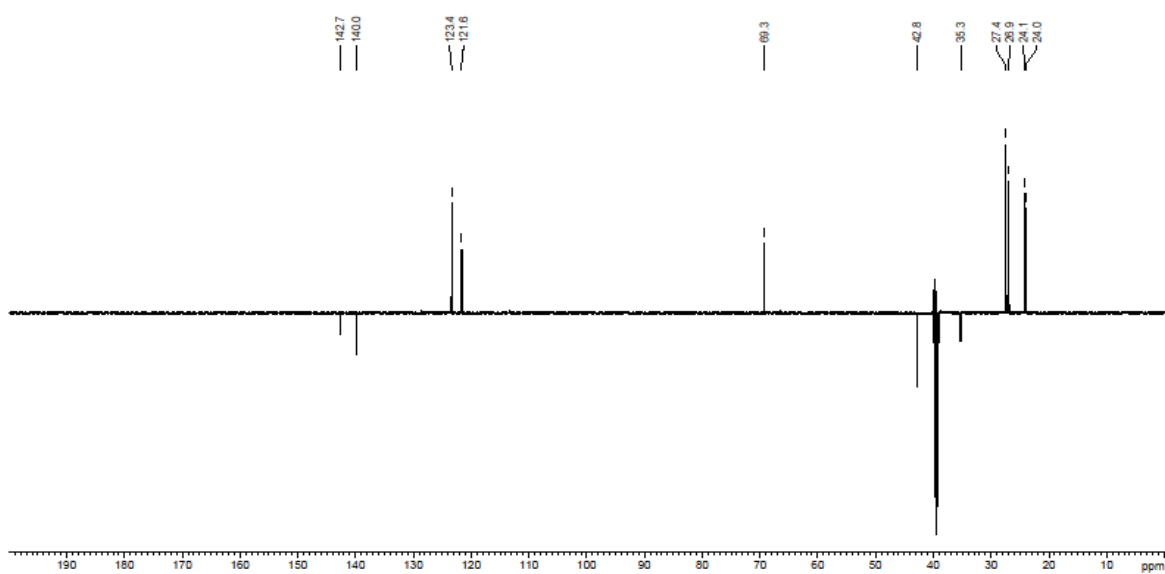

**Figure S54.** <sup>13</sup>C NMR (125 MHz) spectrum of **19a** in DMSO-*d*<sub>6</sub>

**(2*R*)-*N*<sup>1</sup>-(1*R*)-2-(3-chlorophenyl)-1-phenylethyl]-*N*<sup>2</sup>-(2,6-di(propan-2-yl)phenyl)-3,3-dimethylbutane-1,2-diamine [(2*R*,1'*R*)-20a]**

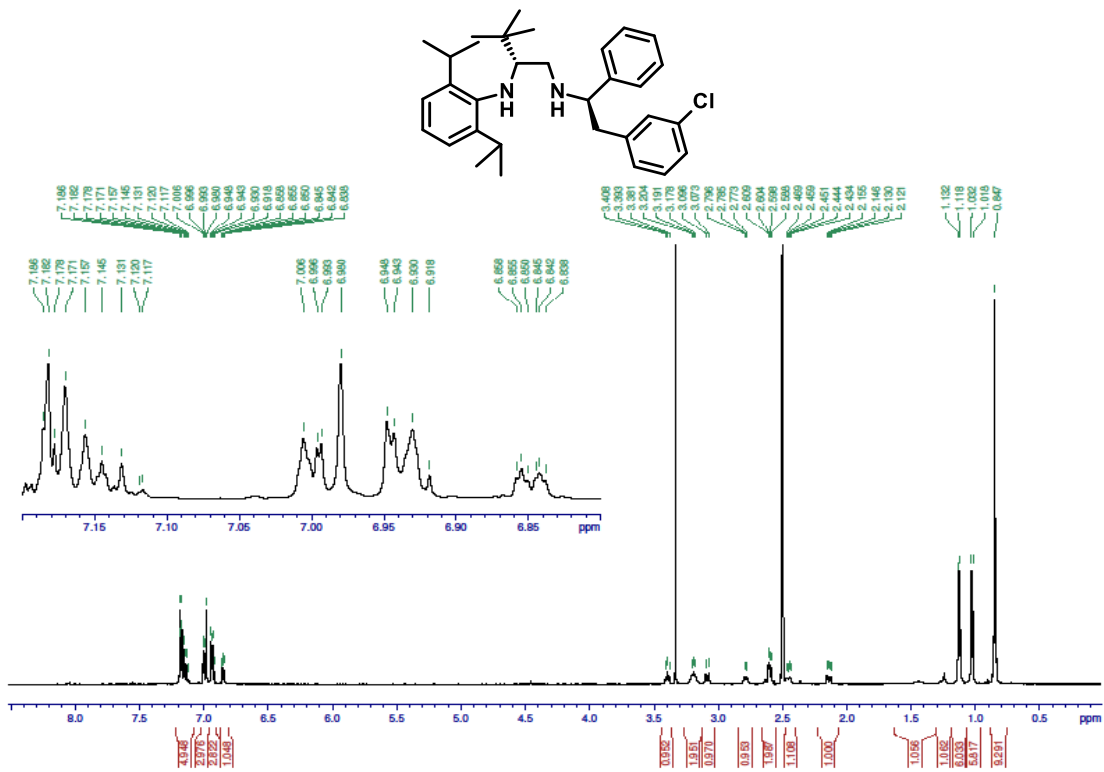

**Figure S55.**  $^1\text{H}$  NMR (500 MHz) spectrum of **20a** in  $\text{DMSO}-d_6$

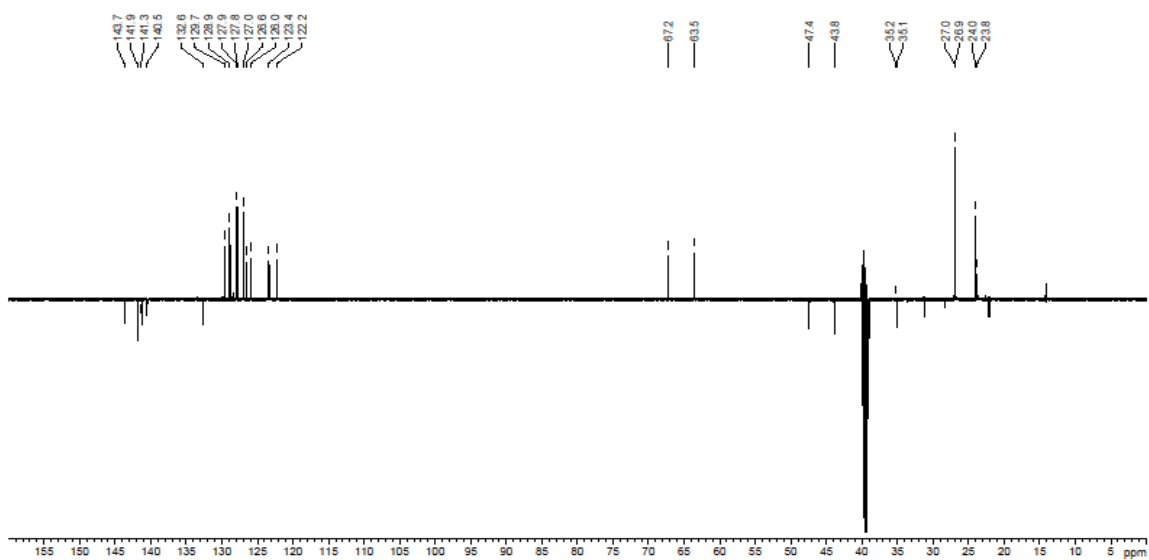

**Figure S56.**  $^{13}\text{C}$  NMR (125 MHz) spectrum of **20a** in  $\text{DMSO}-d_6$

(2*R*)-*N*<sup>1</sup>-[(1*S*)-2-(3-chlorophenyl)-1-phenylethyl]-*N*<sup>2</sup>-(2,6-di(propan-2-yl)phenyl)-3,3-dimethylbutane-1,2-diamine [(2*R*,1'*S*)-20*b*]

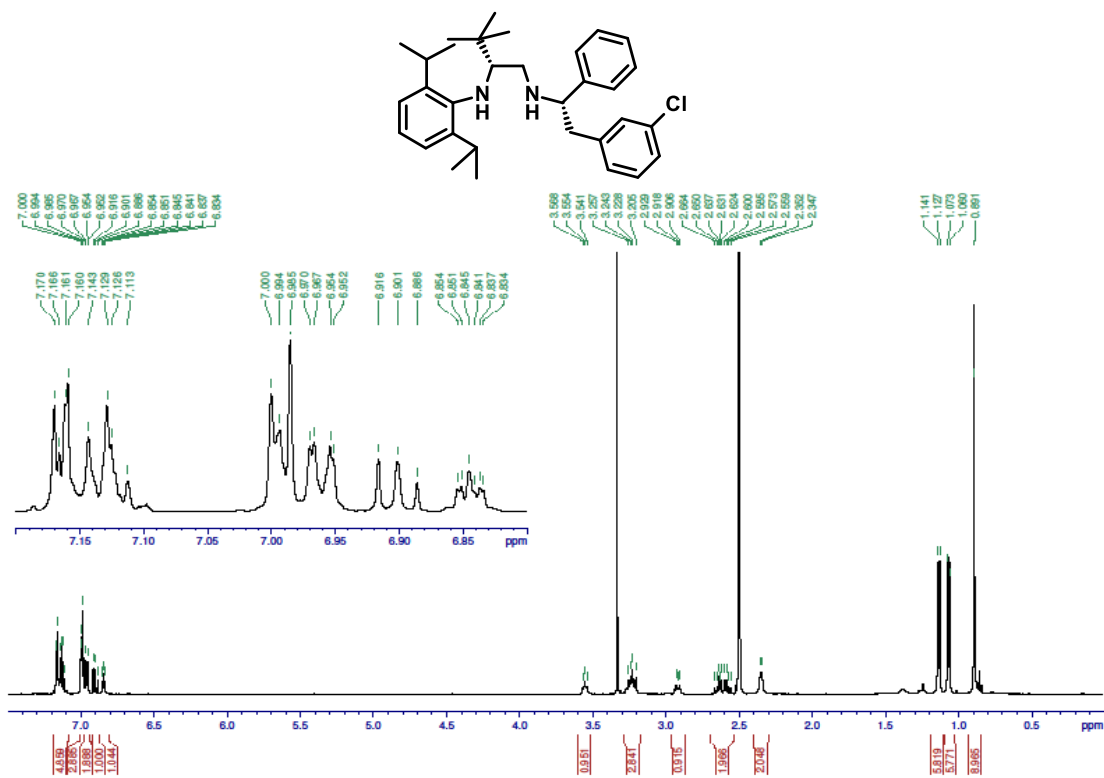

Figure S57. <sup>1</sup>H NMR (400 MHz) spectrum of **20b** in DMSO-*d*<sub>6</sub>

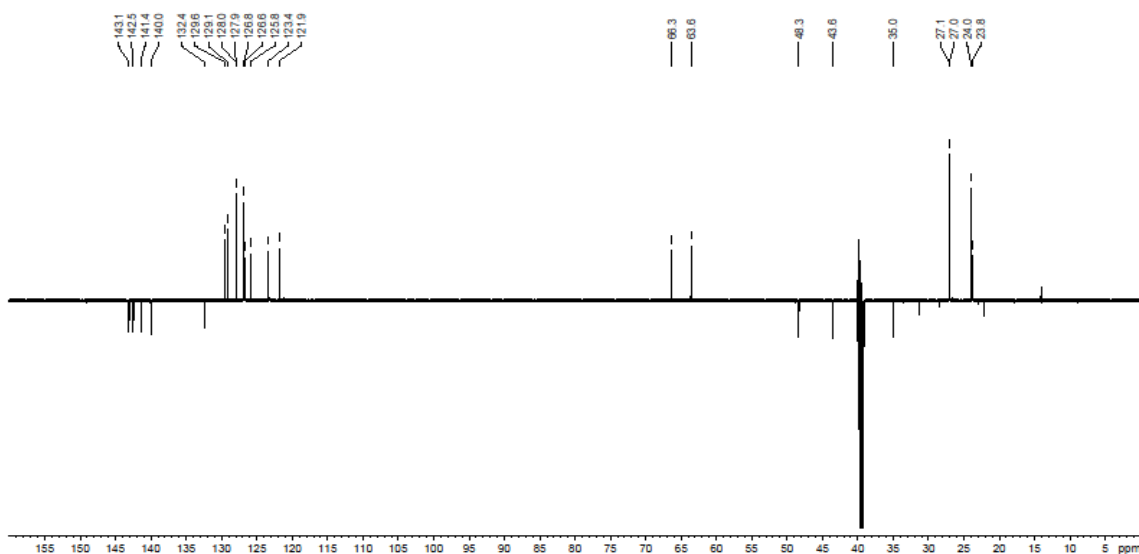

Figure S58. <sup>13</sup>C NMR (100 MHz) spectrum of **20b** in DMSO-*d*<sub>6</sub>

**(2*R*)-*N*<sup>2</sup>-(2,6-di(propan-2-yl)phenyl)-3,3-dimethyl-*N*<sup>1</sup>-[(1'*R*)-2-phenyl-1-[3-(trifluoromethyl)phenyl]ethyl]butane-1,2-diamine [(2*R*,1'*R*)-20c]**

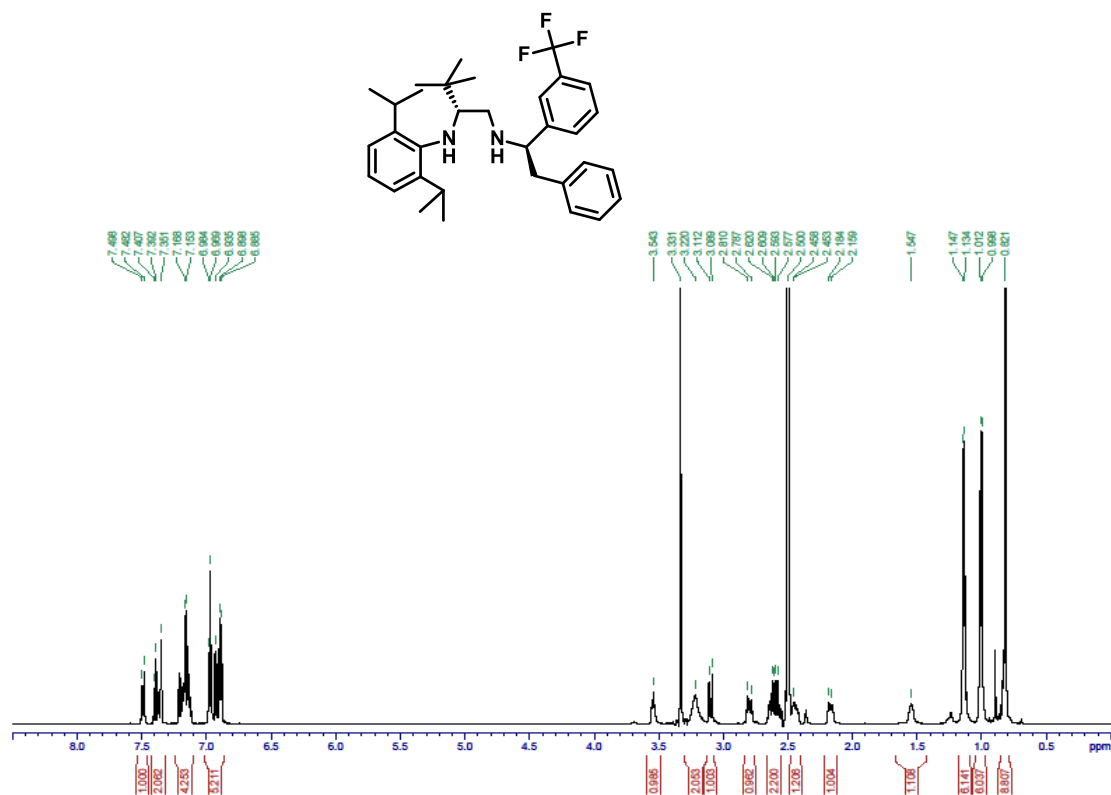

**Figure S59.** <sup>1</sup>H NMR (500 MHz) spectrum of **20c** in DMSO-*d*<sub>6</sub>

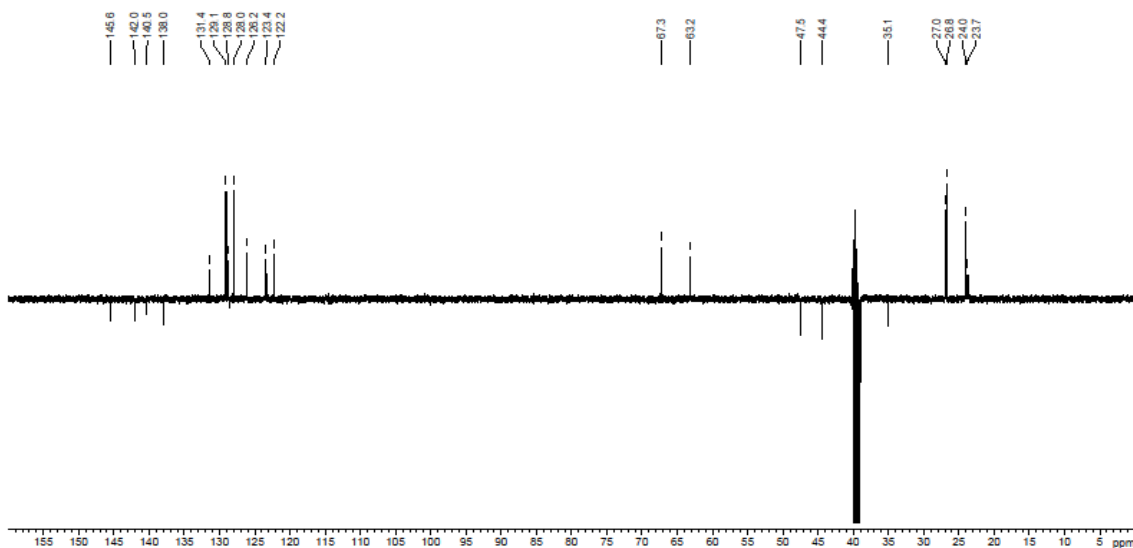

**Figure S60.** <sup>13</sup>C NMR (125 MHz) spectrum of **20c** in DMSO-*d*<sub>6</sub>

**(2*R*)-*N*<sup>2</sup>-(2,6-di(propan-2-yl)phenyl)-3,3-dimethyl-*N*<sup>1</sup>-[(1'*S*)-2-phenyl-1-[3-(trifluoromethyl)phenyl]ethyl]butane-1,2-diamine [(2*R*,1'*S*)-20d]**

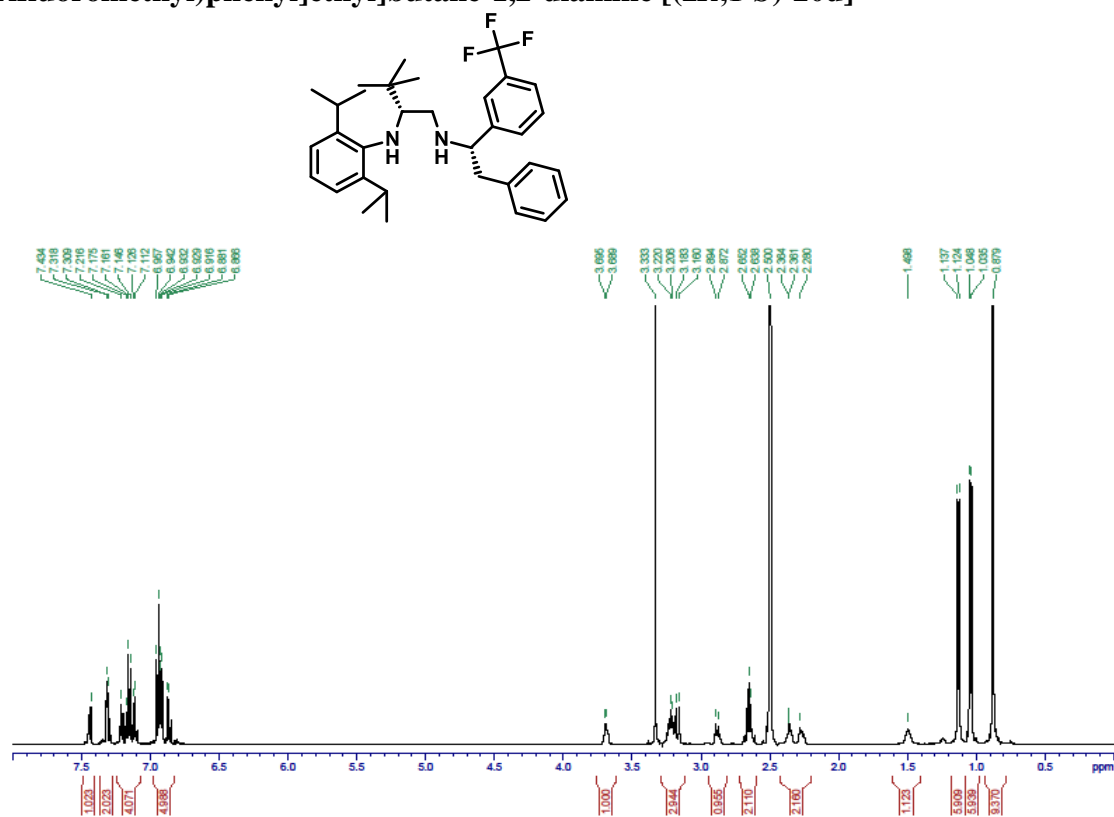

**Figure S61.** <sup>1</sup>H NMR (500 MHz) spectrum of **20d** in DMSO-*d*<sub>6</sub>

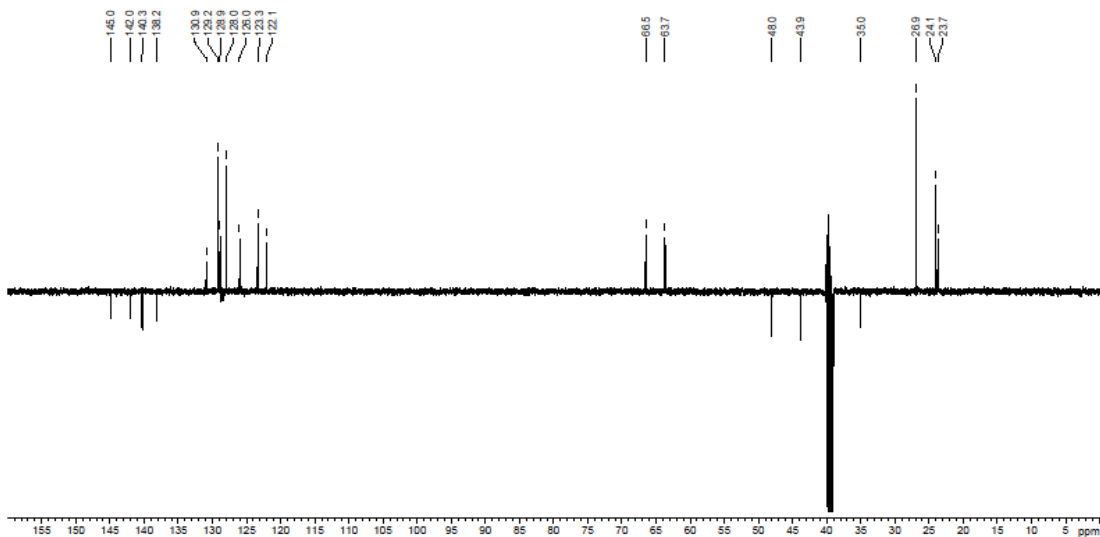

**Figure S62.** <sup>13</sup>C NMR (125 MHz) spectrum of **20d** in DMSO-*d*<sub>6</sub>



**(2*S*)-*N*<sup>2</sup>-(2,6-di(propan-2-yl)phenyl)-*N*<sup>1</sup>-[(1'*S*)-1-(2-methoxyphenyl)-2-phenylethyl]-3,3-dimethylbutane-1,2-diamine [(2*S*,1'*S*)-20e]**

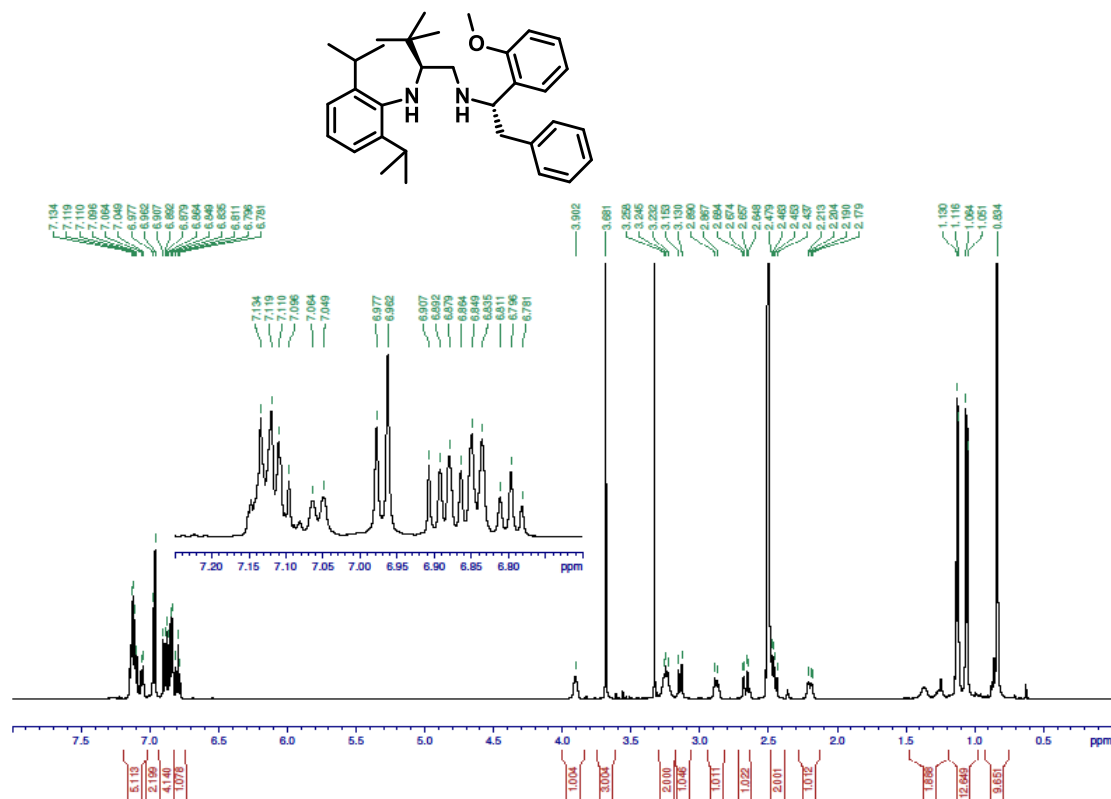

**Figure S63.** <sup>1</sup>H NMR (500 MHz) spectrum of **20e** in DMSO-*d*<sub>6</sub>

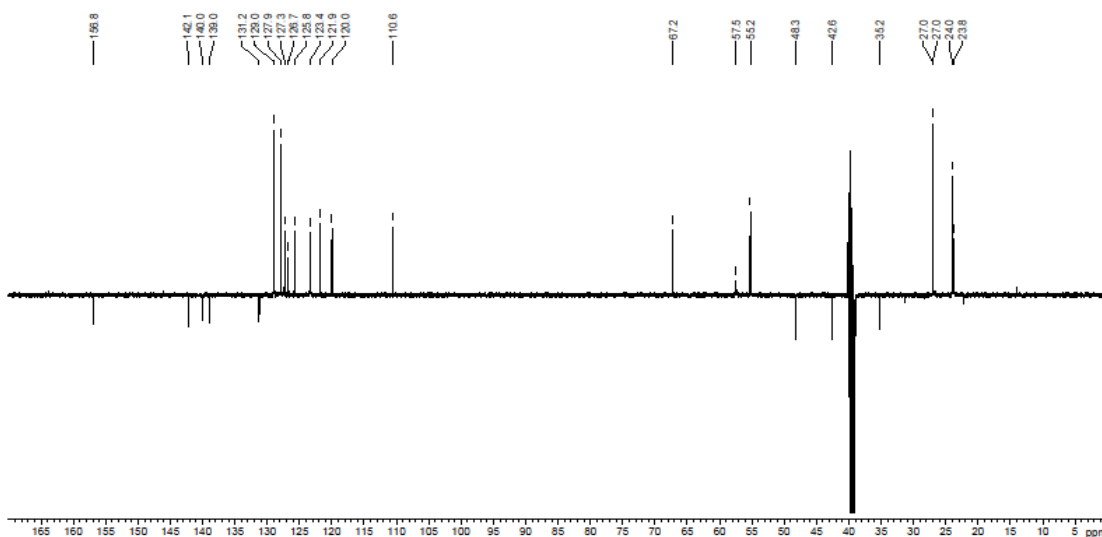

**Figure S64.** <sup>13</sup>C NMR (125 MHz) spectrum of **20e** in DMSO-*d*<sub>6</sub>

**(2*S*)-*N*<sup>2</sup>-(2,6-di(propan-2-yl)phenyl)-*N*<sup>1</sup>-[(1'*R*)-1-(2-methoxyphenyl)-2-phenylethyl]-3,3-dimethylbutane-1,2-diamine [(2*S*,1'*R*)-20f]**

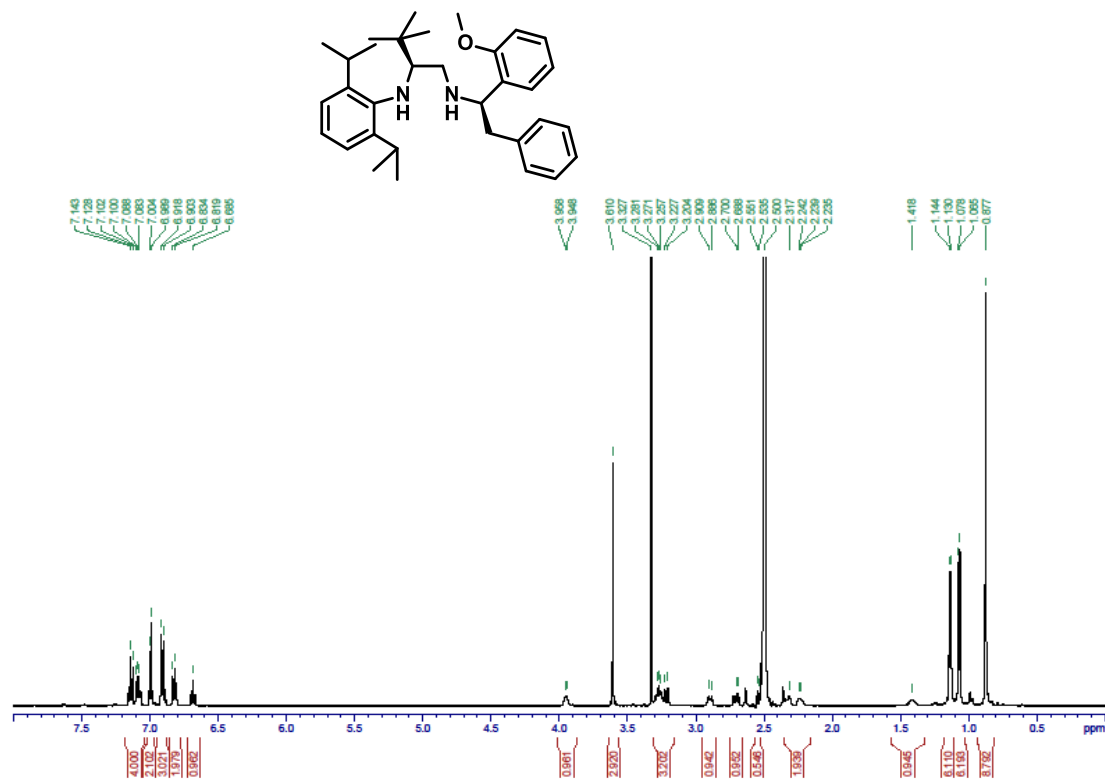

**Figure S65.** <sup>1</sup>H NMR (500 MHz) spectrum of **20f** in DMSO-*d*<sub>6</sub>

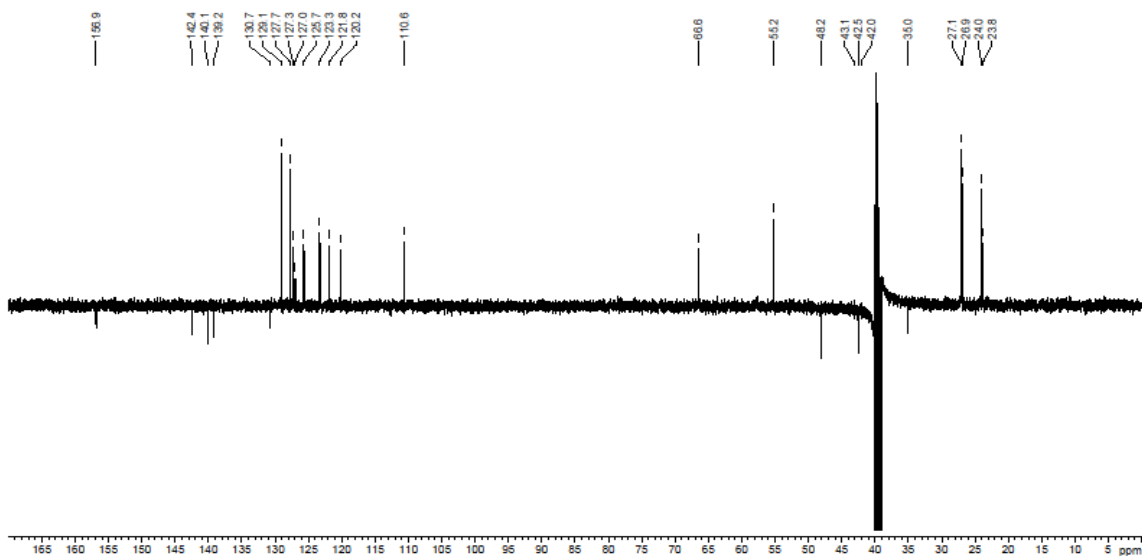

**Figure S66.** <sup>13</sup>C NMR (125 MHz) spectrum of **20f** in DMSO-*d*<sub>6</sub>

(2*S*)-*N*<sup>2</sup>-(2,6-di(propan-2-yl)phenyl)-*N*<sup>1</sup>-[(1'*S*)-1-(3-methoxyphenyl)-2-phenylethyl]-3,3-dimethylbutane-1,2-diamine [(2*S*,1'*S*)-**20g**]

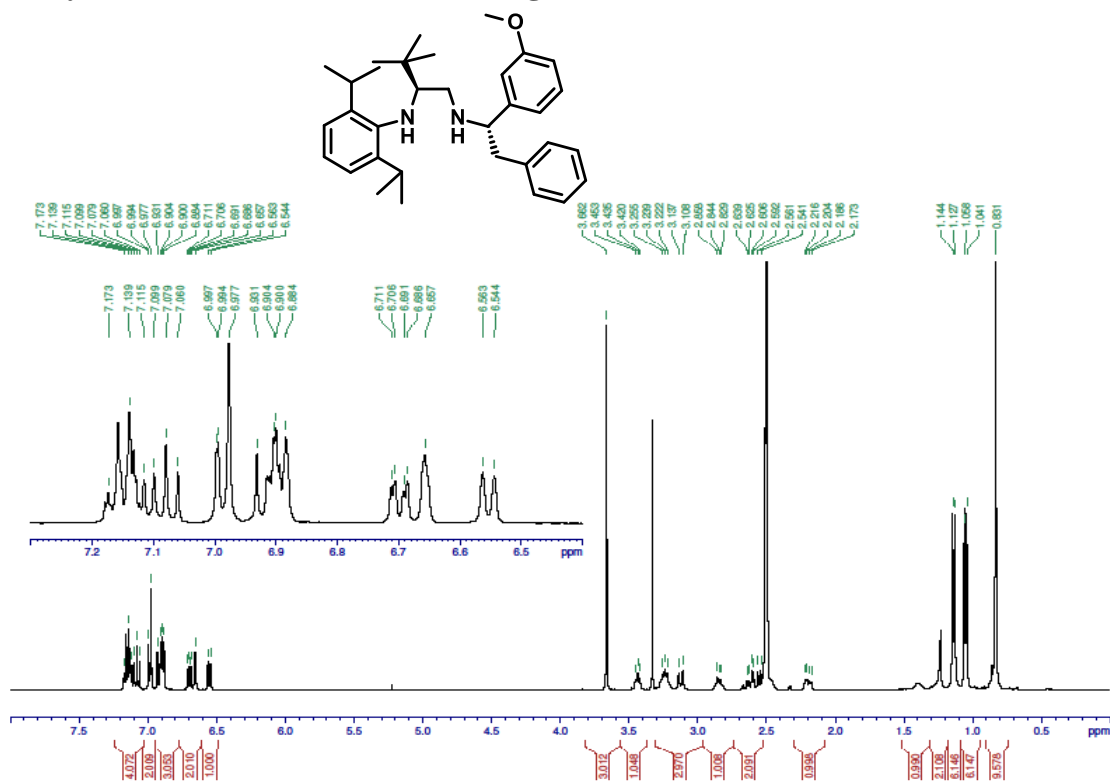

Figure S67. <sup>1</sup>H NMR (400 MHz) spectrum of **20g** in DMSO-*d*<sub>6</sub>

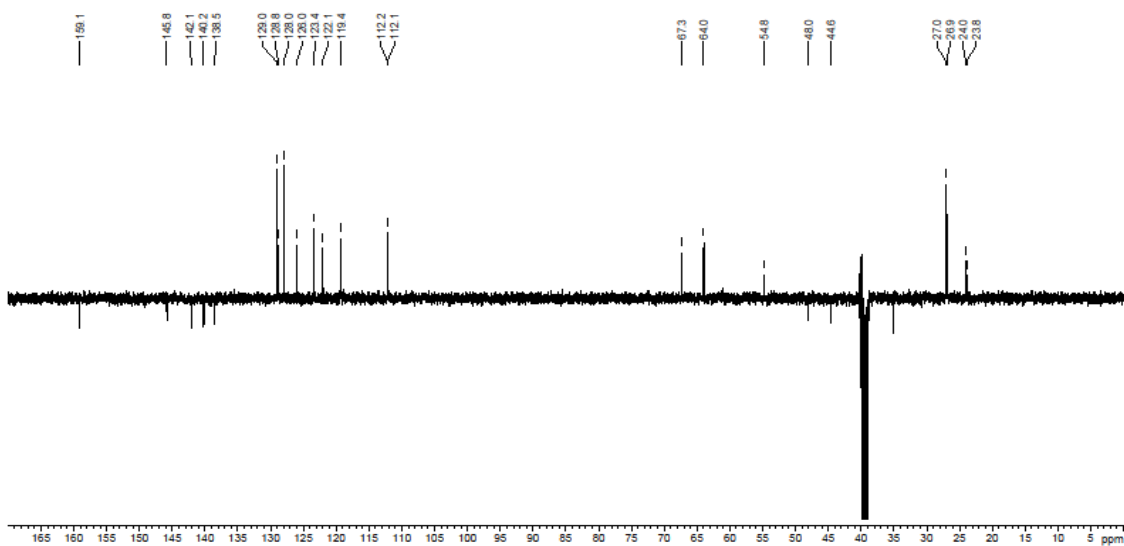

Figure S68. <sup>13</sup>C NMR (100 MHz) spectrum of **20g** in DMSO-*d*<sub>6</sub>

(2*S*)-*N*<sup>2</sup>-(2,6-di(propan-2-yl)phenyl)-*N*<sup>1</sup>-[(1'*R*)-1-(3-methoxyphenyl)-2-phenylethyl]-3,3-dimethylbutane-1,2-diamine [(2*S*,1'*R*)-20h]

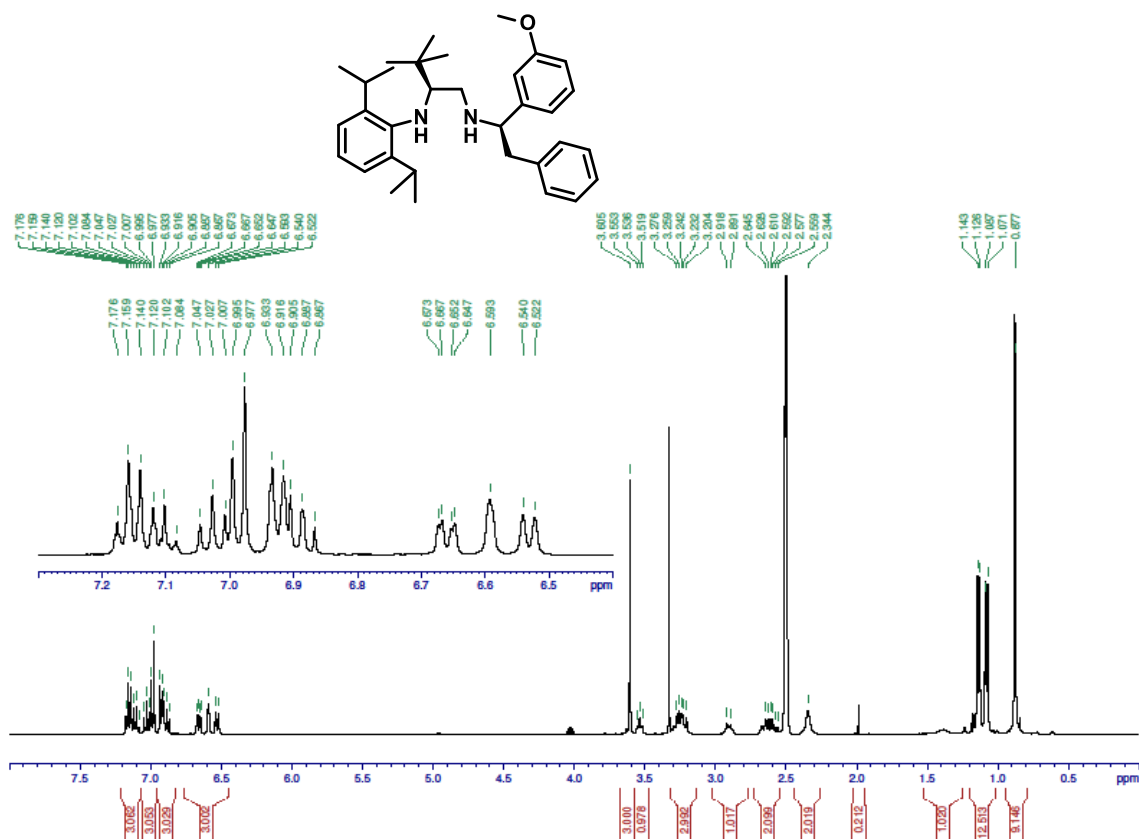

Figure S69. <sup>1</sup>H NMR (400 MHz) spectrum of **20h** in DMSO-*d*<sub>6</sub>

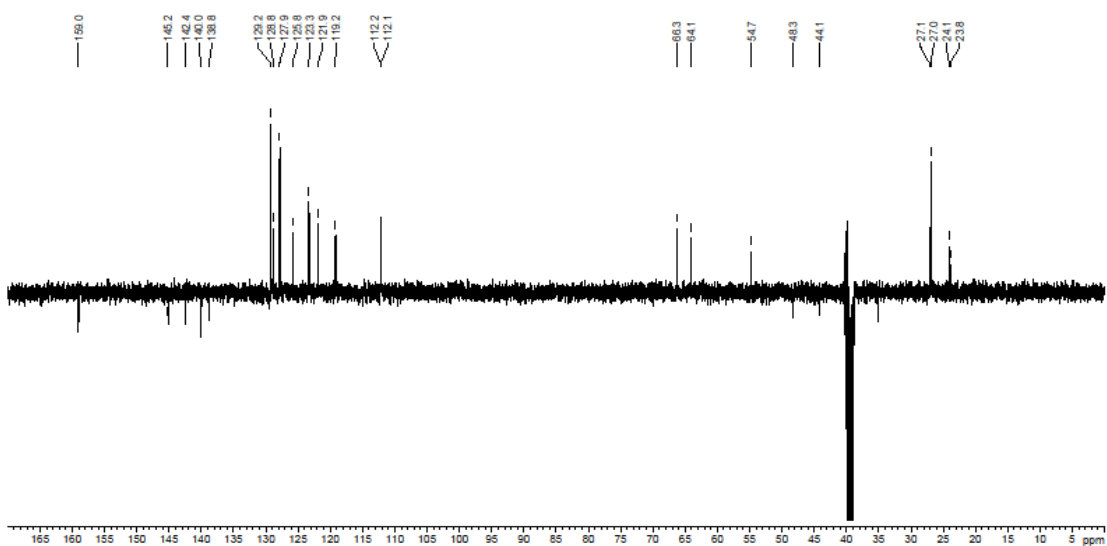

Figure S70. <sup>13</sup>C NMR (100 MHz) spectrum of **20h** in DMSO-*d*<sub>6</sub>

(2*S*)-*N*<sup>2</sup>-(2,6-di(propan-2-yl)phenyl)-*N*<sup>1</sup>-[(1'*R*)-1-(4-methoxyphenyl)-2-phenylethyl]-3,3-dimethylbutane-1,2-diamine [(2*S*,1'*R*)-20i]

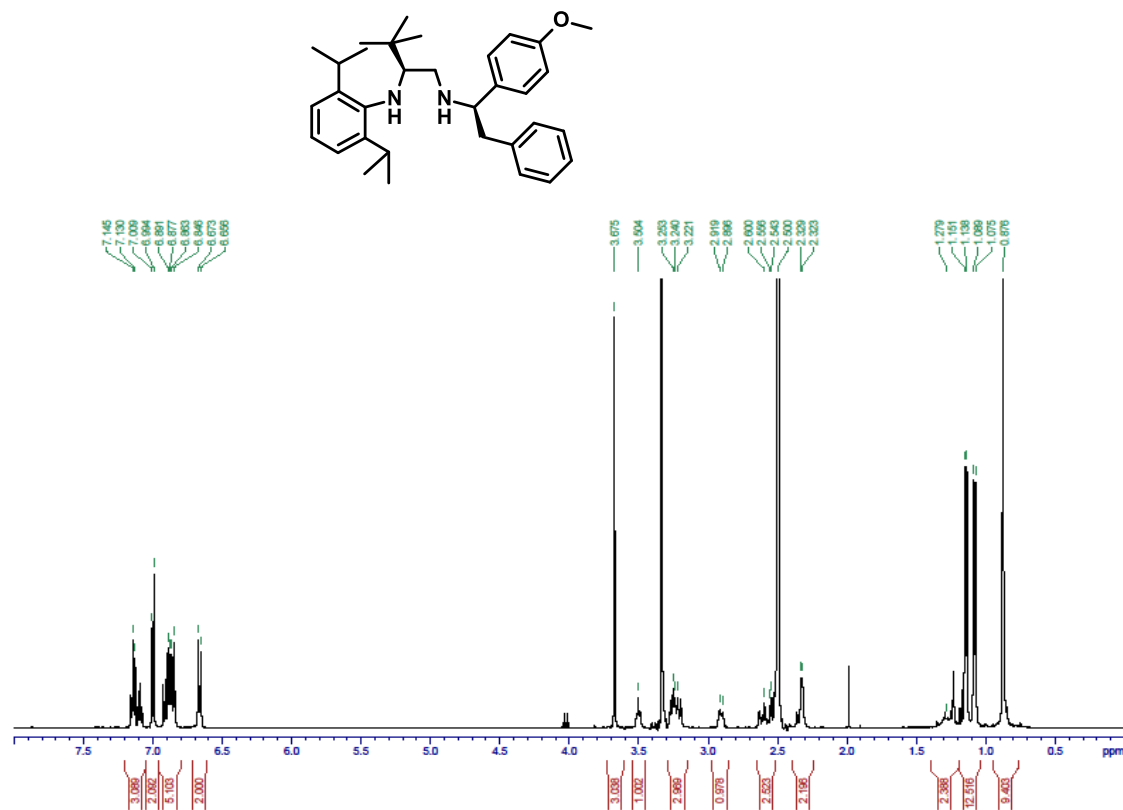

Figure S71. <sup>1</sup>H NMR (500 MHz) spectrum of **20i** in DMSO-*d*<sub>6</sub>

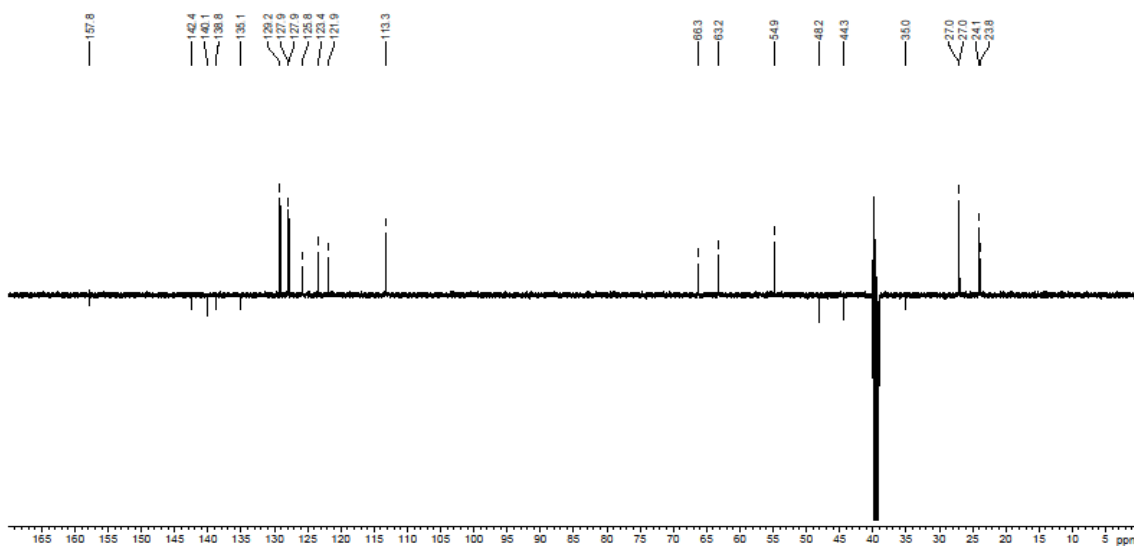

Figure S72. <sup>13</sup>C NMR (125 MHz) spectrum of **20i** in DMSO-*d*<sub>6</sub>

(2*S*)-*N*<sup>2</sup>-(2,6-di(propan-2-yl)phenyl)-*N*<sup>1</sup>-[(1'*S*)-1-(4-methoxyphenyl)-2-phenylethyl]-3,3-dimethylbutane-1,2-diamine [(2*S*,1'*S*)-20j]

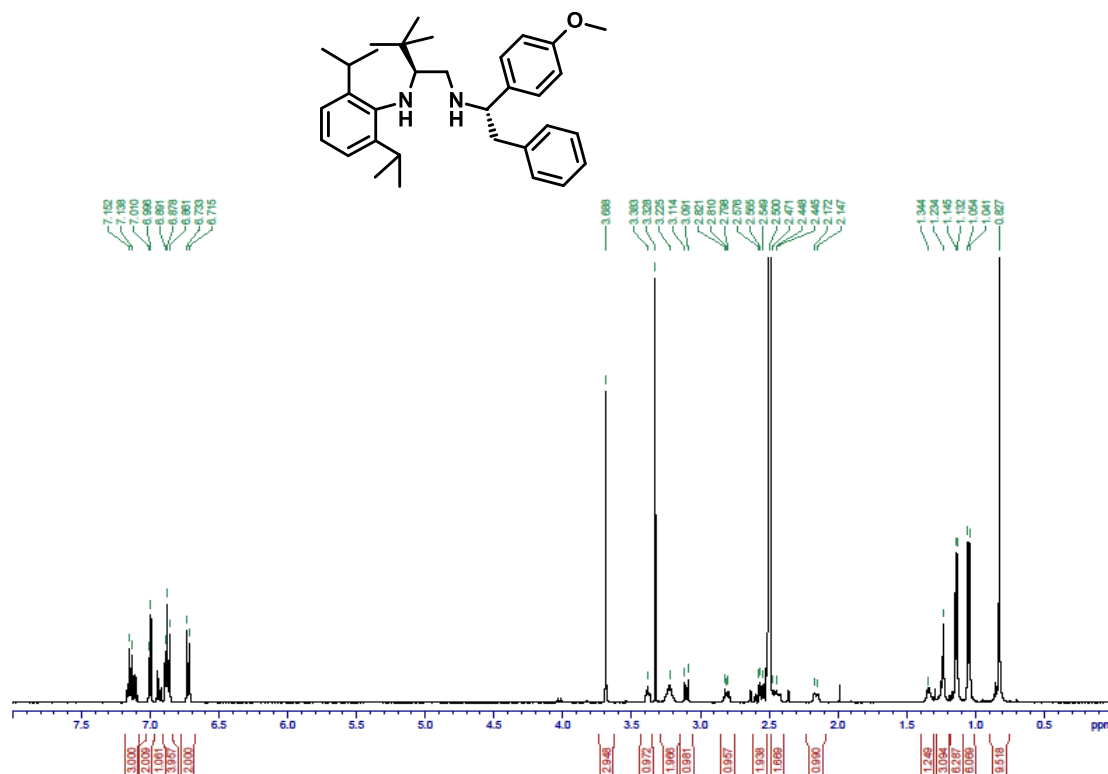

Figure S73. <sup>1</sup>H NMR (500 MHz) spectrum of **20j** in DMSO-*d*<sub>6</sub>

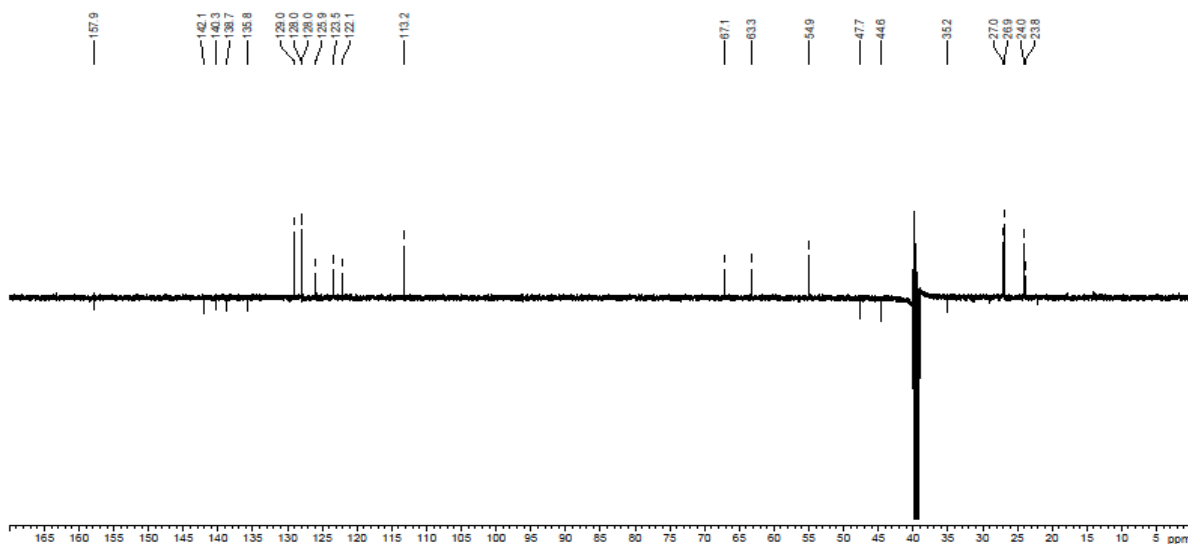

Figure S74. <sup>13</sup>C NMR (125 MHz) spectrum of **20j** in DMSO-*d*<sub>6</sub>

**(2*S*)-*N*<sup>2</sup>-(2,6-di(propan-2-yl)phenyl)-3,3-dimethyl-*N*<sup>1</sup>-[(1'*R*)-1-(*o*-tolyl)-2-phenylethyl]butane-1,2-diamine [(2*S*,1'*R*)-201]**

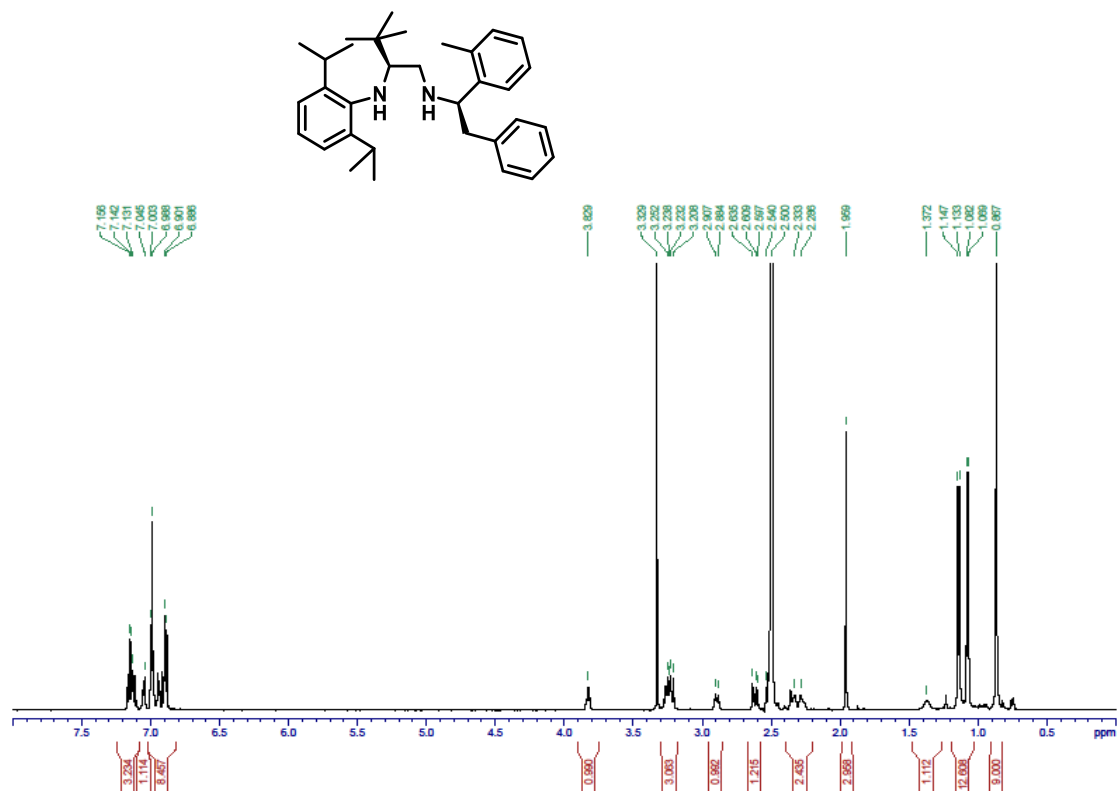

**Figure S75.** <sup>1</sup>H NMR (500 MHz) spectrum of **201** in DMSO-*d*<sub>6</sub>

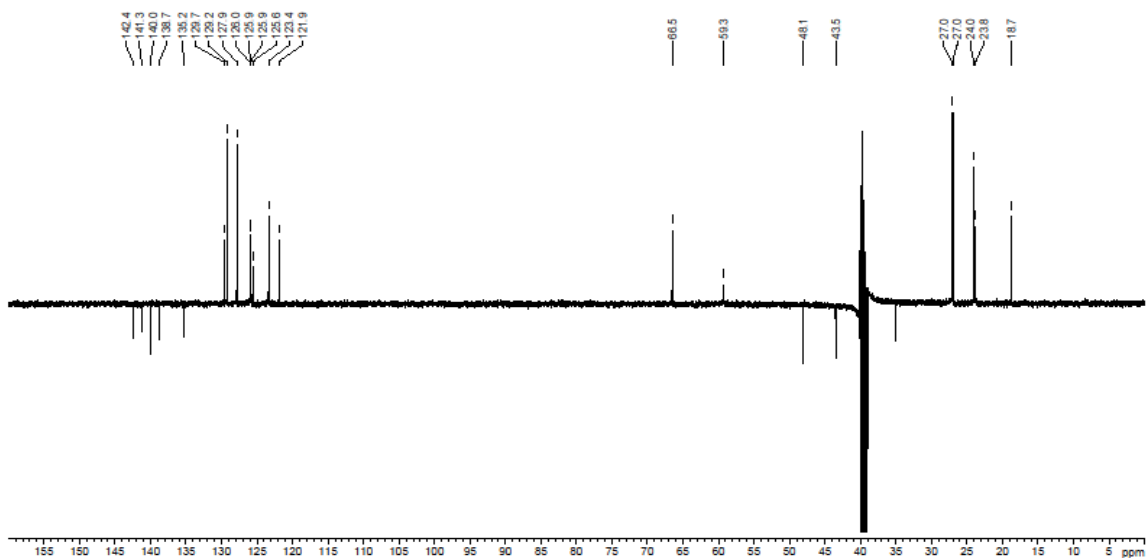

**Figure S76.** <sup>13</sup>C NMR (125 MHz) spectrum of **201** in DMSO-*d*<sub>6</sub>

(2*S*)-*N*<sup>2</sup>-(2,6-di(propan-2-yl)phenyl)-3,3-dimethyl-*N*<sup>1</sup>-[(1'*R*)-2-phenyl-1-(*p*-tolyl)ethyl]butane-1,2-diamine [(2*S*,1'*R*)-20*m*]

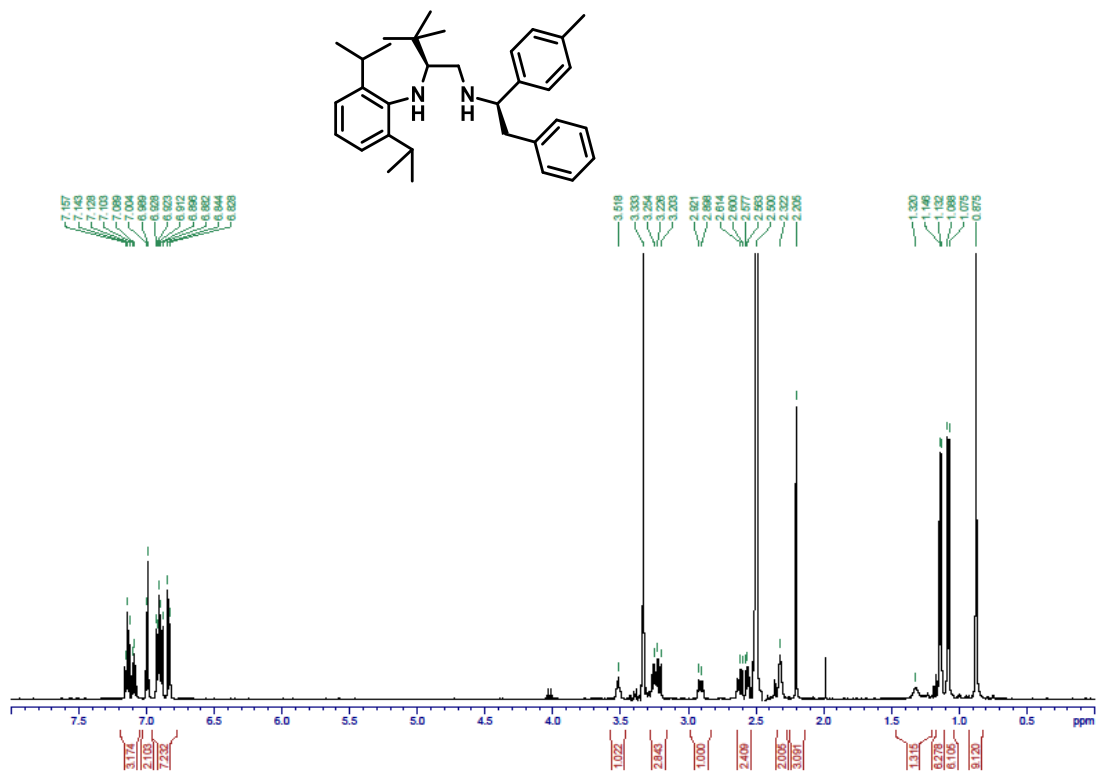

Figure S77. <sup>1</sup>H NMR (500 MHz) spectrum of **20m** in DMSO-*d*<sub>6</sub>

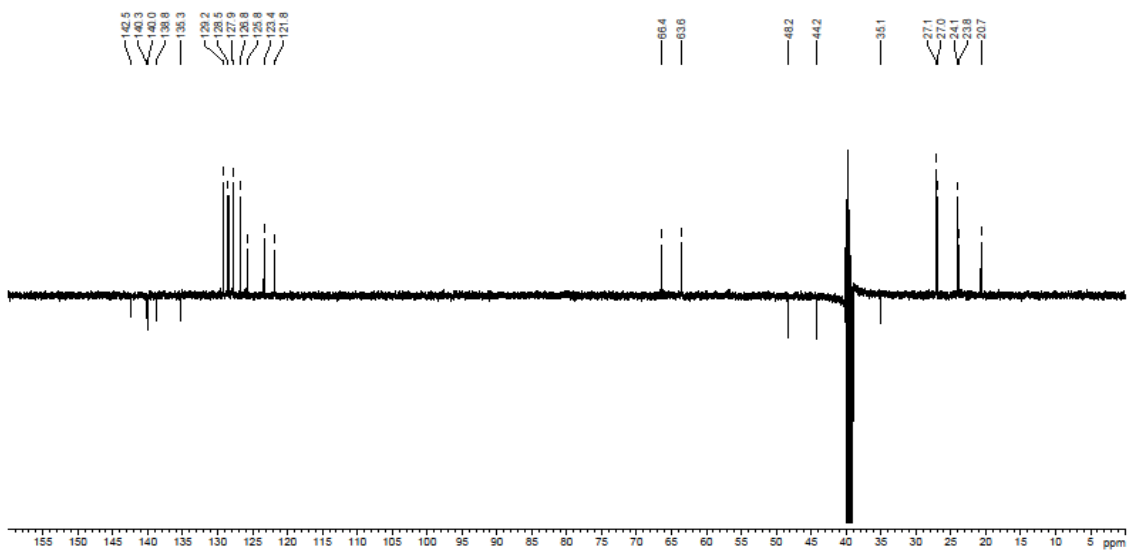

Figure S78. <sup>13</sup>C NMR (125 MHz) spectrum of **20m** in DMSO-*d*<sub>6</sub>



(2*S*)-*N*<sup>2</sup>-(2,6-di(propan-2-yl)phenyl)-3,3-dimethyl-*N*<sup>1</sup>-[(1'*S*)-2-phenyl-1-(p-tolyl)ethyl]butane-1,2-diamine [(2*S*,1'*S*)-20n]

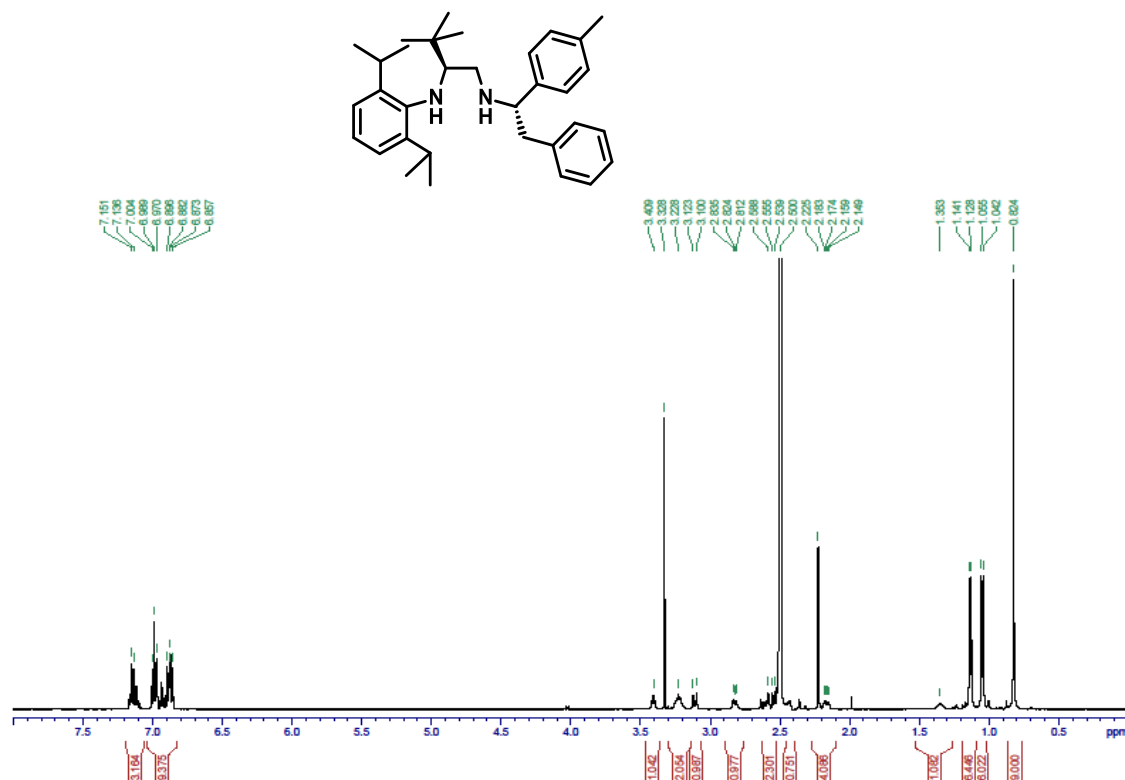

Figure S79. <sup>1</sup>H NMR (500 MHz) spectrum of **20n** in DMSO-*d*<sub>6</sub>

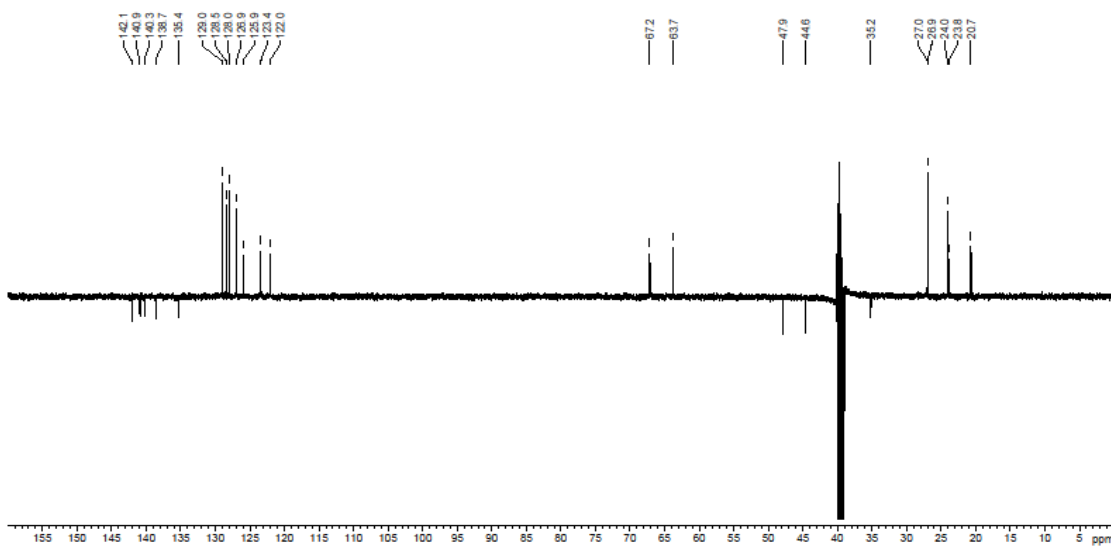

Figure S80. <sup>13</sup>C NMR (125 MHz) spectrum of **20n** in DMSO-*d*<sub>6</sub>

(2*S*)-*N*<sup>2</sup>-(2,6-di(propan-2-yl)phenyl)-3,3-dimethyl-*N*<sup>1</sup>-[(1'*R*)-2-phenyl-1-[4-(trifluoromethyl)phenyl]ethyl]butane-1,2-diamine [(2*S*,1'*R*)-**20o**]

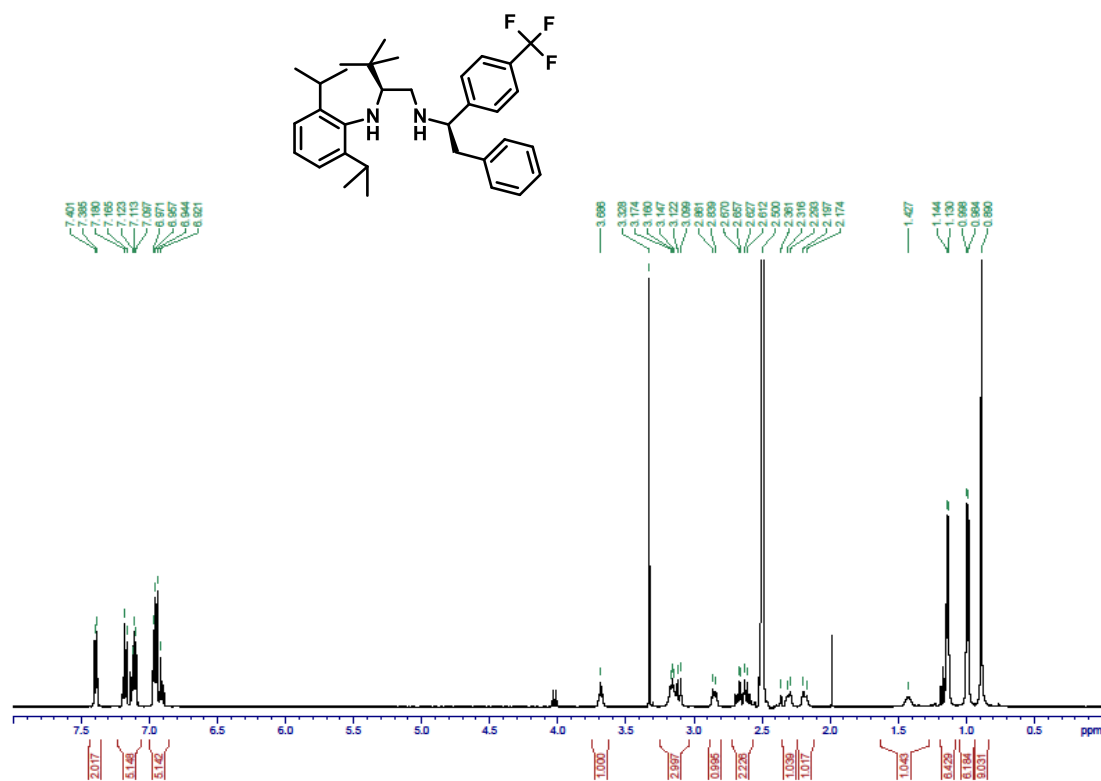

Figure S81. <sup>1</sup>H NMR (500 MHz) spectrum of **20o** in DMSO-*d*<sub>6</sub>

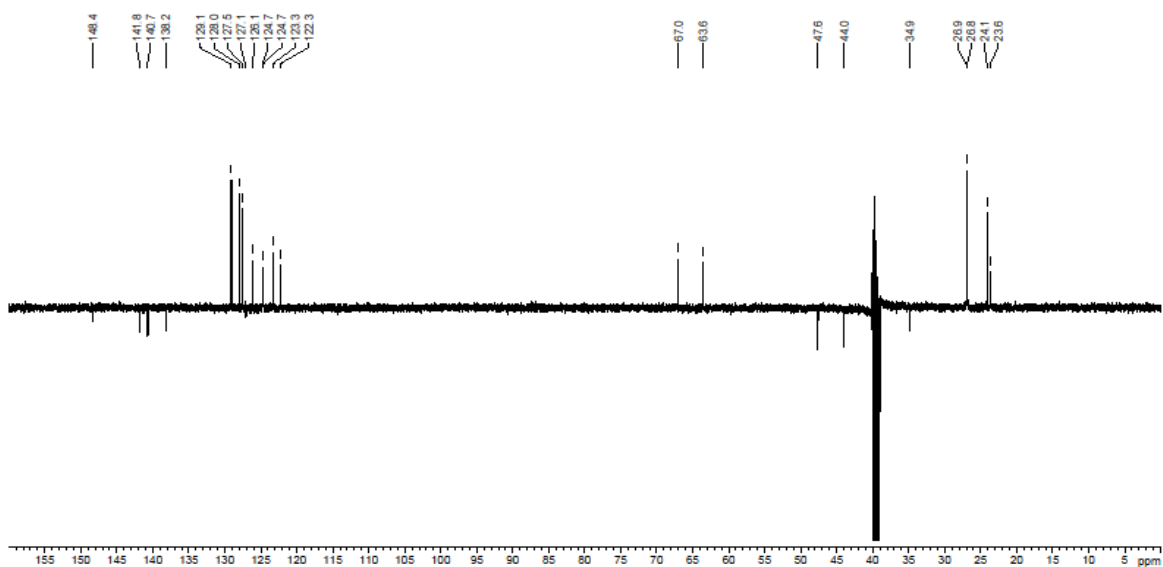

Figure S82. <sup>13</sup>C NMR (125 MHz) spectrum of **20o** in DMSO-*d*<sub>6</sub>

(2*S*)-*N*<sup>2</sup>-(2,6-di(propan-2-yl)phenyl)-3,3-dimethyl-*N*<sup>1</sup>-[(1'*S*)-2-phenyl-1-[4-(trifluoromethyl)phenyl]ethyl]butane-1,2-diamine [(2*S*,1'*S*)-20p]

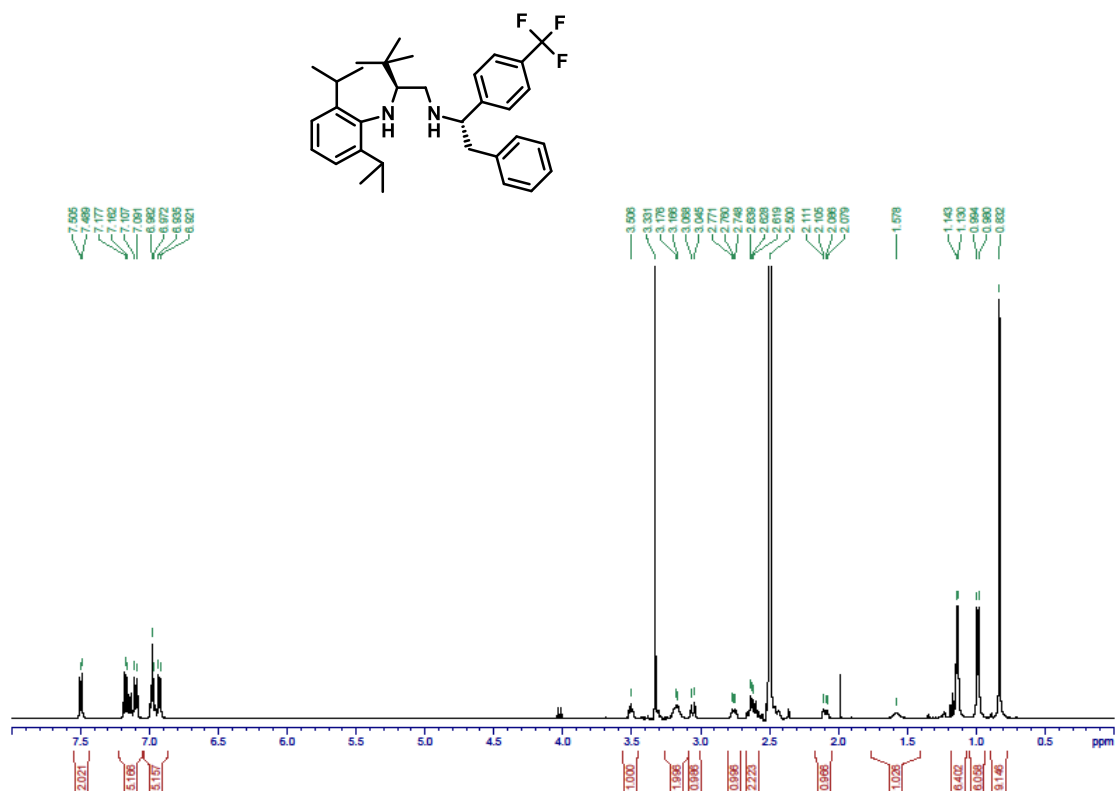

Figure S83. <sup>1</sup>H NMR (500 MHz) spectrum of **20p** in DMSO-*d*<sub>6</sub>

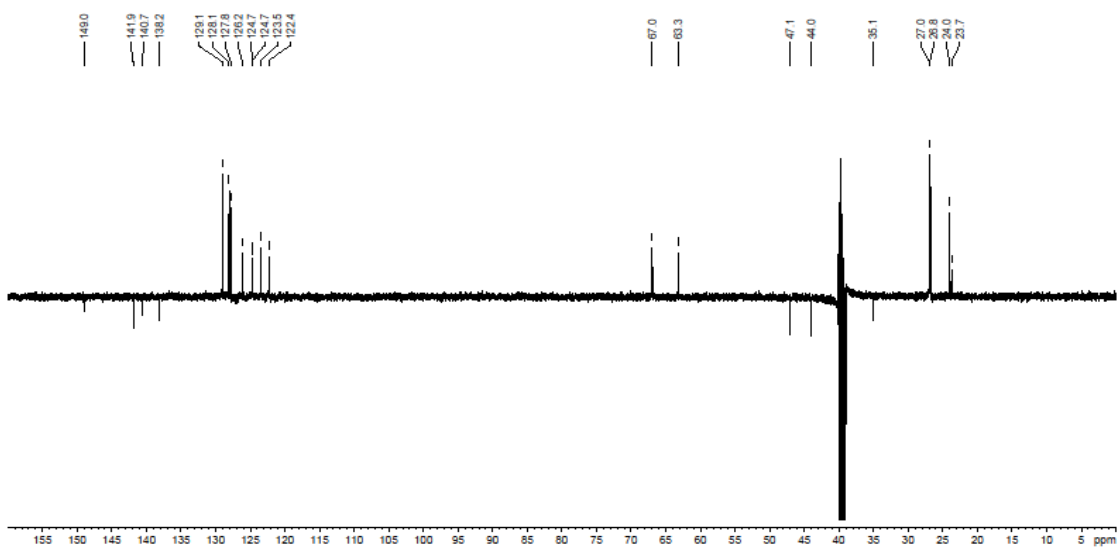

Figure S84. <sup>13</sup>C NMR (125 MHz) spectrum of **20p** in DMSO-*d*<sub>6</sub>

(2*S*)-*N*<sup>2</sup>-(2,6-di(propan-2-yl)phenyl)-3,3-dimethyl-*N*<sup>1</sup>-[(1'*S*)-1-phenyl-2-(p-tolyl)ethyl]butane-1,2-diamine [(2*S*,1'*S*)-20q]

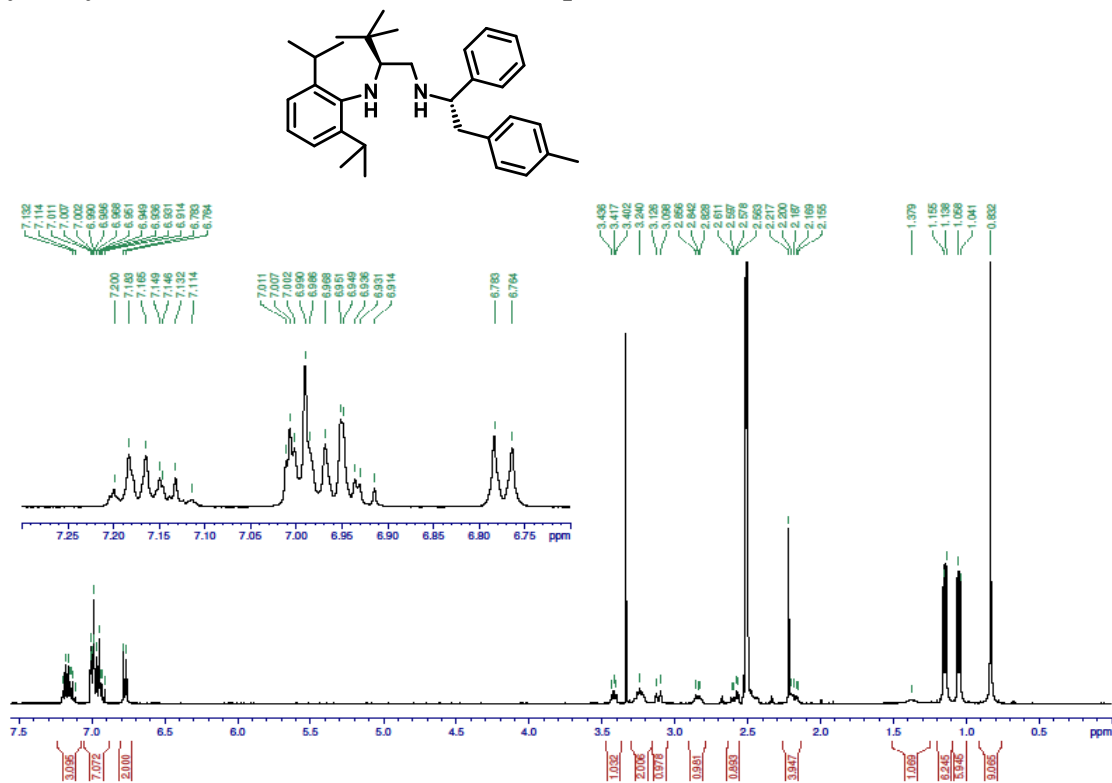

Figure S85. <sup>1</sup>H NMR (500 MHz) spectrum of **20q** in DMSO-*d*<sub>6</sub>

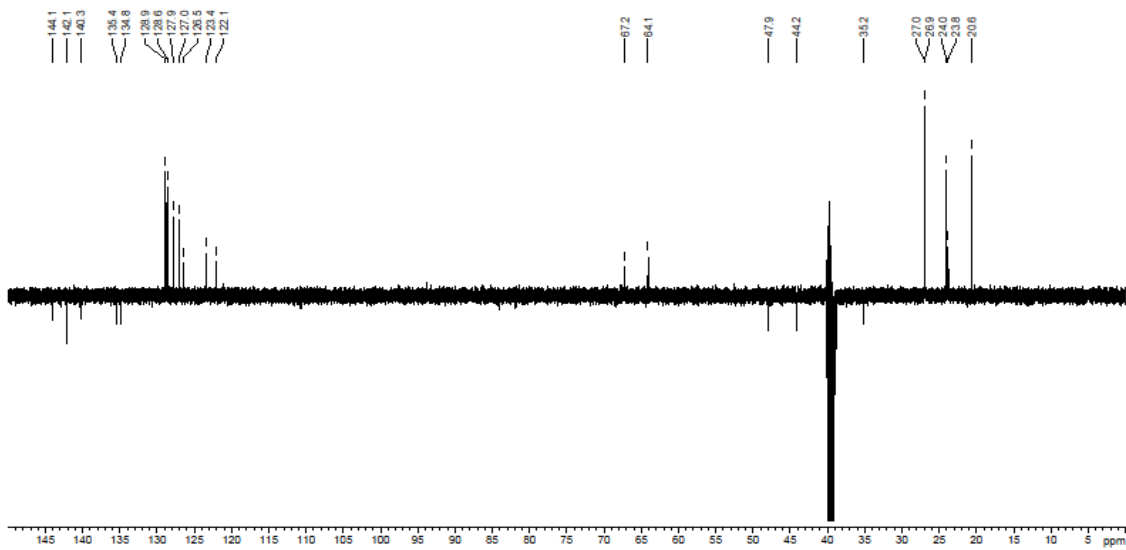

Figure S86. <sup>13</sup>C NMR (125 MHz) spectrum of **20q** in DMSO-*d*<sub>6</sub>

(2*S*)-*N*<sup>2</sup>-(2,6-di(propan-2-yl)phenyl)-3,3-dimethyl-*N*<sup>1</sup>-[(1'*R*)-1-phenyl-2-(p-tolyl)ethyl]butane-1,2-diamine [(2*S*,1'*R*)-20r]

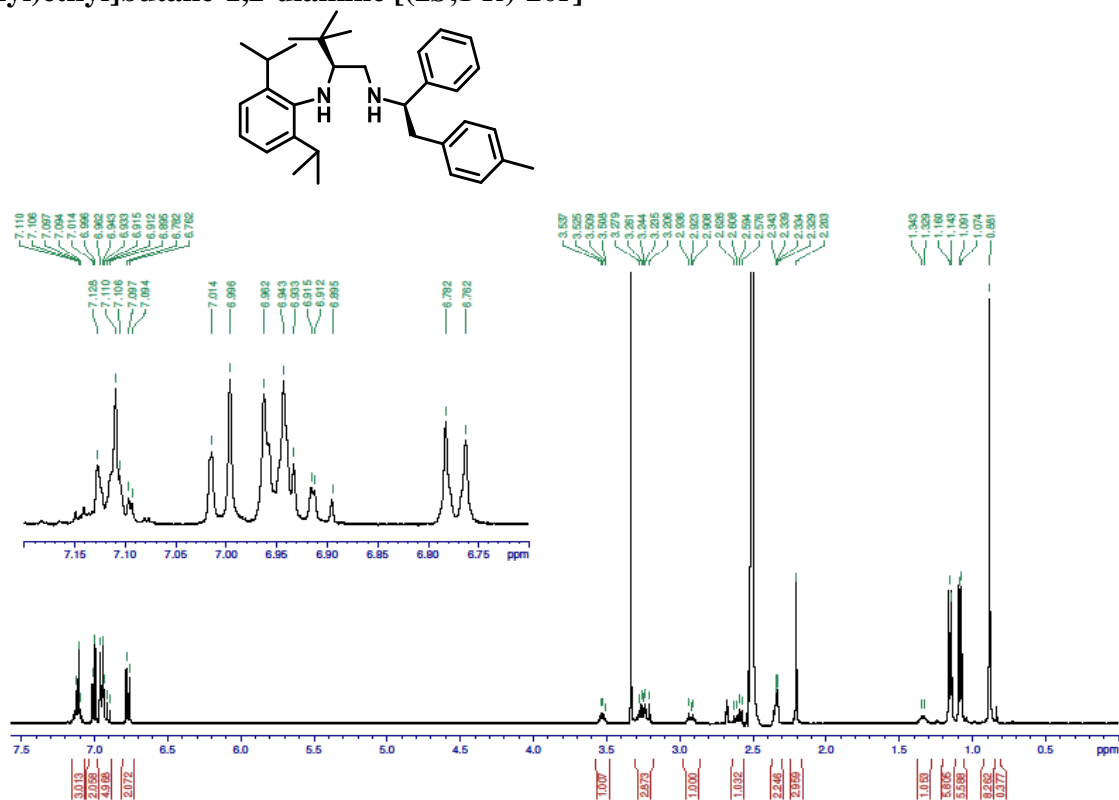

Figure S87. <sup>1</sup>H NMR (400 MHz) spectrum of 20r in DMSO-*d*<sub>6</sub>

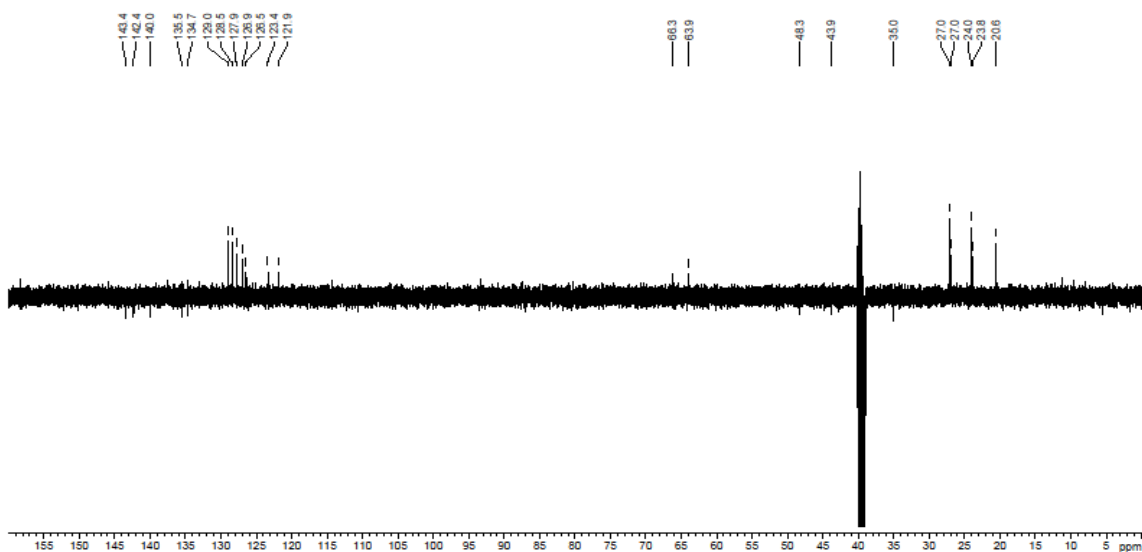

Figure S88. <sup>13</sup>C NMR (100 MHz) spectrum of 20r in DMSO-*d*<sub>6</sub>

(2*S*)-*N*<sup>1</sup>-[(1'*S*)-2-(4-chlorophenyl)-1-phenylethyl]-*N*<sup>2</sup>-(2,6-di(propan-2-yl)phenyl)-3,3-dimethylbutane-1,2-diamine [(2*S*,1'*S*)-20*s*]

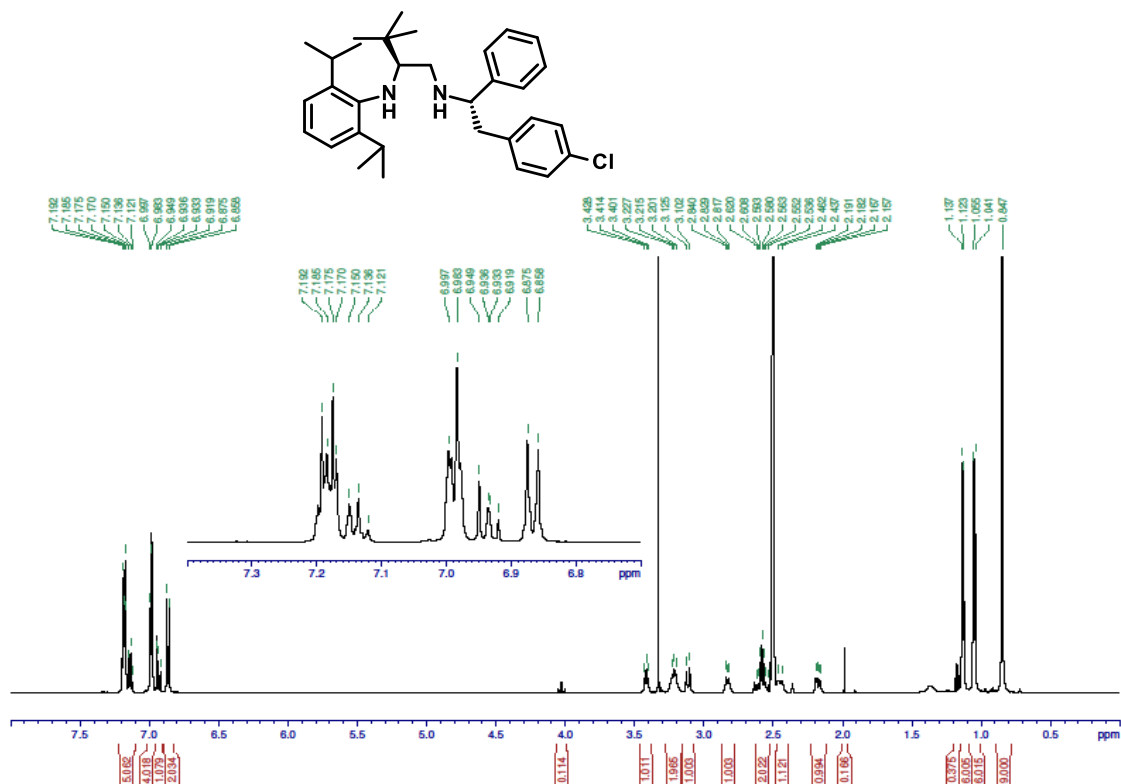

Figure S89. <sup>1</sup>H NMR (500 MHz) spectrum of 20*s* in DMSO-*d*<sub>6</sub>

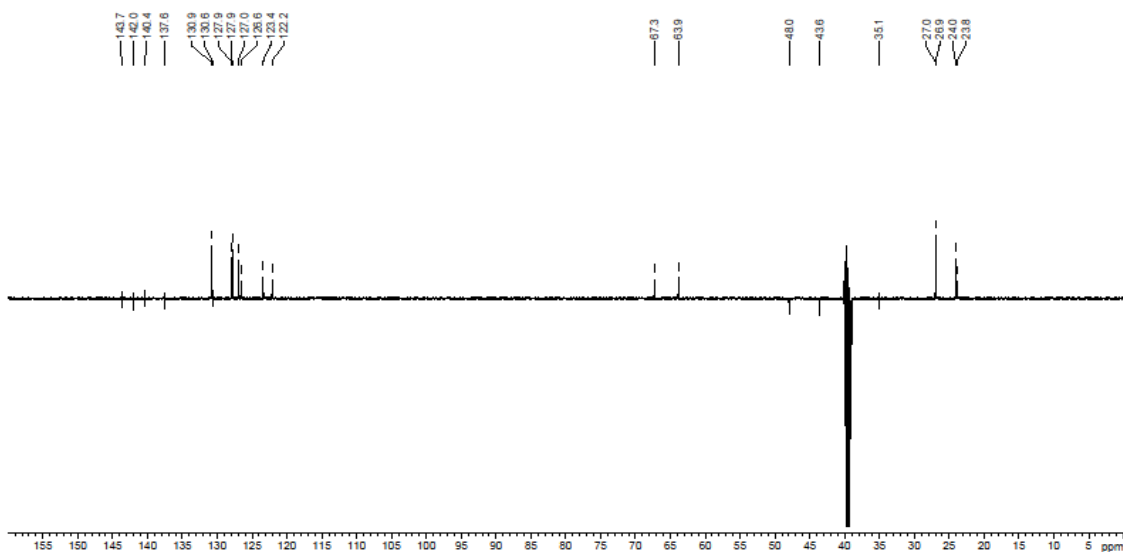

Figure S90. <sup>13</sup>C NMR (125 MHz) spectrum of 20*s* in DMSO-*d*<sub>6</sub>

(2*S*)-*N*<sup>1</sup>-[(1'*R*)-2-(4-chlorophenyl)-1-phenylethyl]-*N*<sup>2</sup>-(2,6-di(propan-2-yl)phenyl)-3,3-dimethylbutane-1,2-diamine [(2*S*,1'*R*)-20*t*]

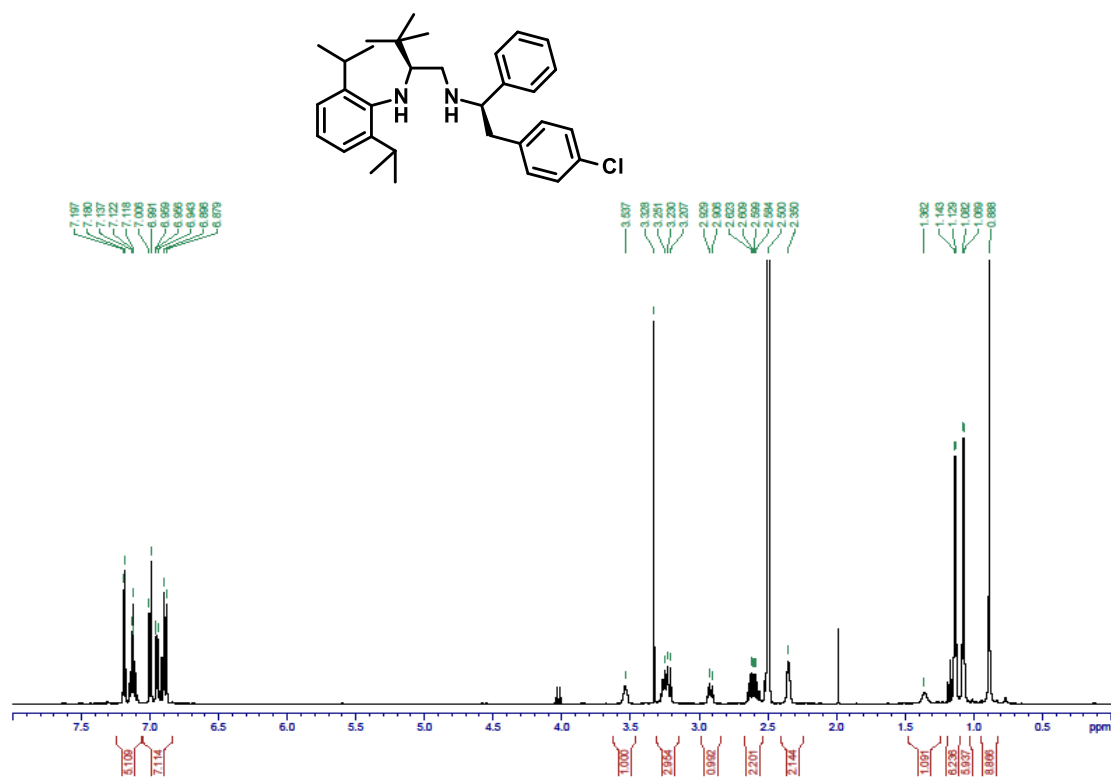

Figure S91. <sup>1</sup>H NMR (500 MHz) spectrum of **20t** in DMSO-*d*<sub>6</sub>

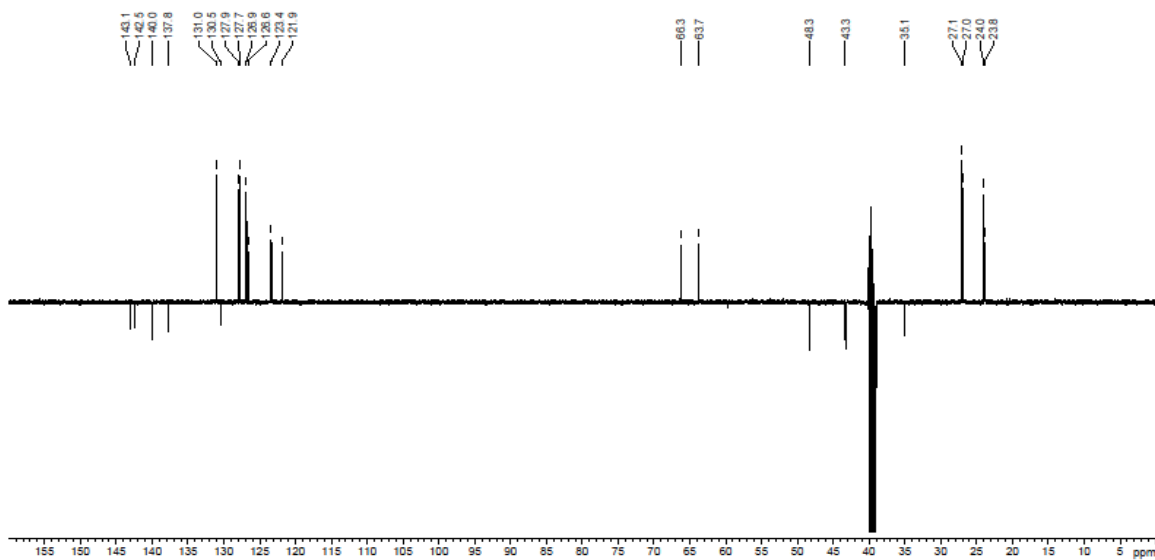

Figure S92. <sup>13</sup>C NMR (125 MHz) spectrum of **20t** in DMSO-*d*<sub>6</sub>

(2*S*)-*N*<sup>1</sup>-[(1'*S*)-2-(2-chlorophenyl)-1-phenylethyl]-*N*<sup>2</sup>-(2,6-di(propan-2-yl)phenyl)-3,3-dimethylbutane-1,2-diamine [(2*S*,1'*S*)-**20u**]

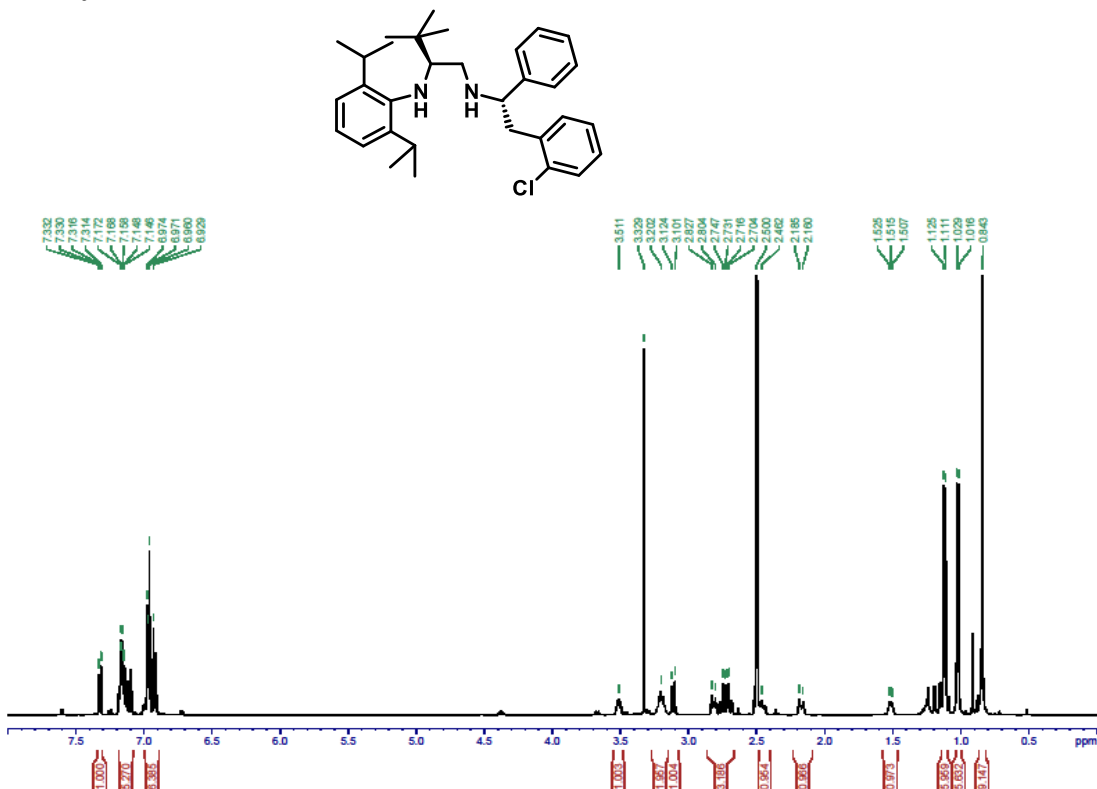

Figure S93. <sup>1</sup>H NMR (500 MHz) spectrum of **20u** in DMSO-*d*<sub>6</sub>

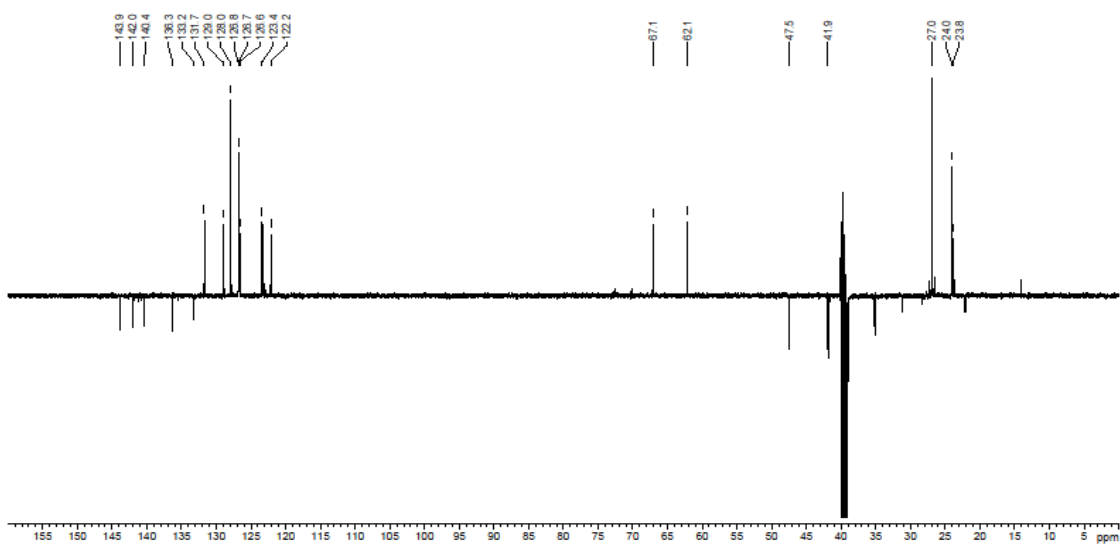

Figure S94. <sup>13</sup>C NMR (125 MHz) spectrum of **20u** in DMSO-*d*<sub>6</sub>



(2*S*)-*N*<sup>1</sup>-[(1'*R*)-2-(2-chlorophenyl)-1-phenylethyl]-*N*<sup>2</sup>-(2,6-di(propan-2-yl)phenyl)-3,3-dimethylbutane-1,2-diamine [(2*S*,1'*R*)-20*v*]

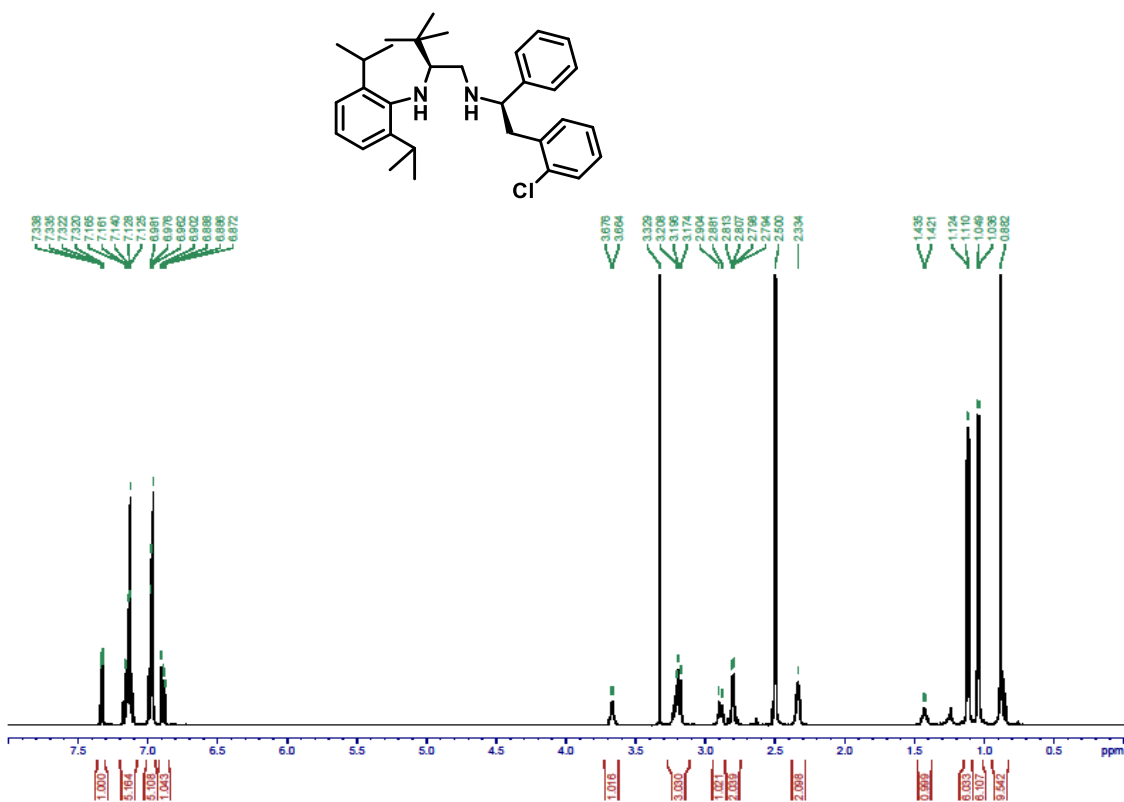

Figure S95. <sup>1</sup>H NMR (500 MHz) spectrum of **20v** in DMSO-*d*<sub>6</sub>

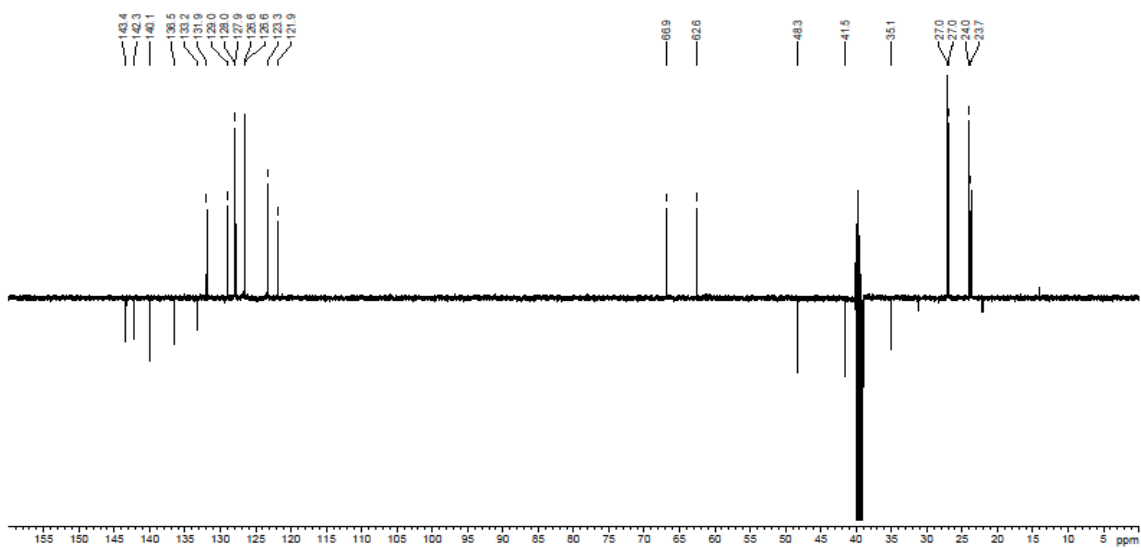

Figure S96. <sup>13</sup>C NMR (125 MHz) spectrum of **20v** in DMSO-*d*<sub>6</sub>

***N*<sup>1</sup>-[(1'*S*)-2-(4-chlorophenyl)-1-phenylethyl]-*N*<sup>2</sup>-(2,6-di(propan-2-yl)phenyl)ethane-1,2-diamine [(1'*S*)-20w]**

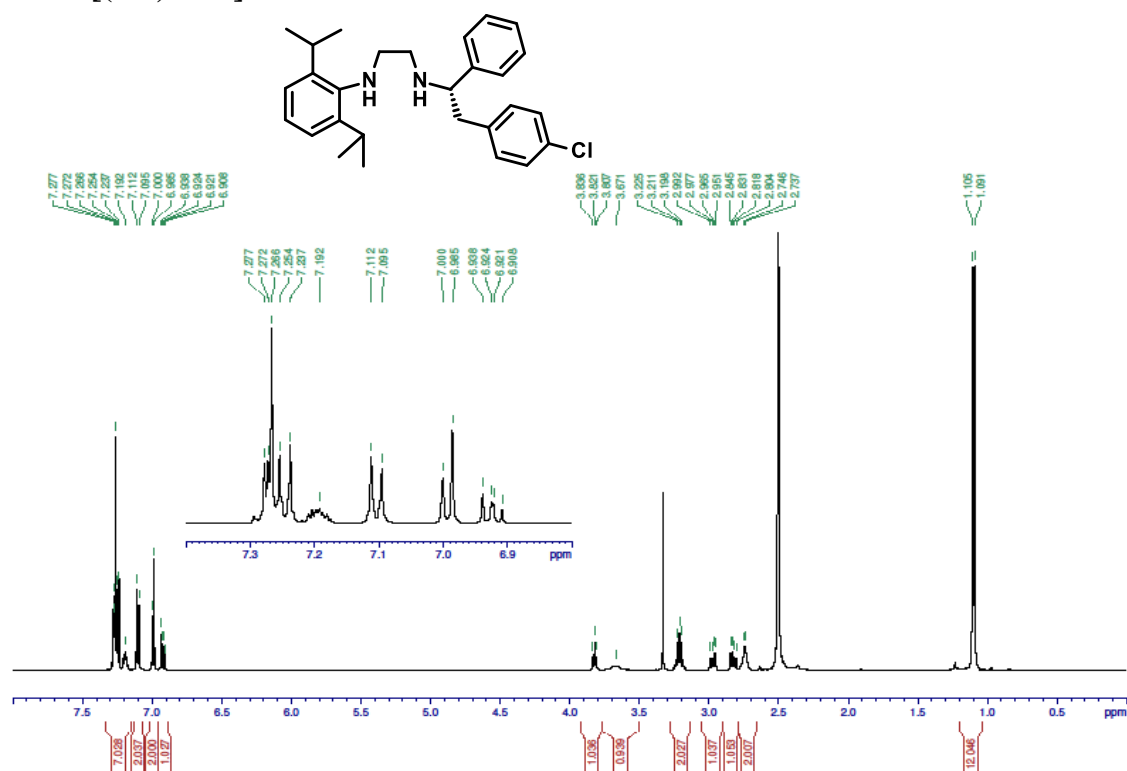

**Figure S97.** <sup>1</sup>H NMR (500 MHz) spectrum of **20w** in DMSO-*d*<sub>6</sub>

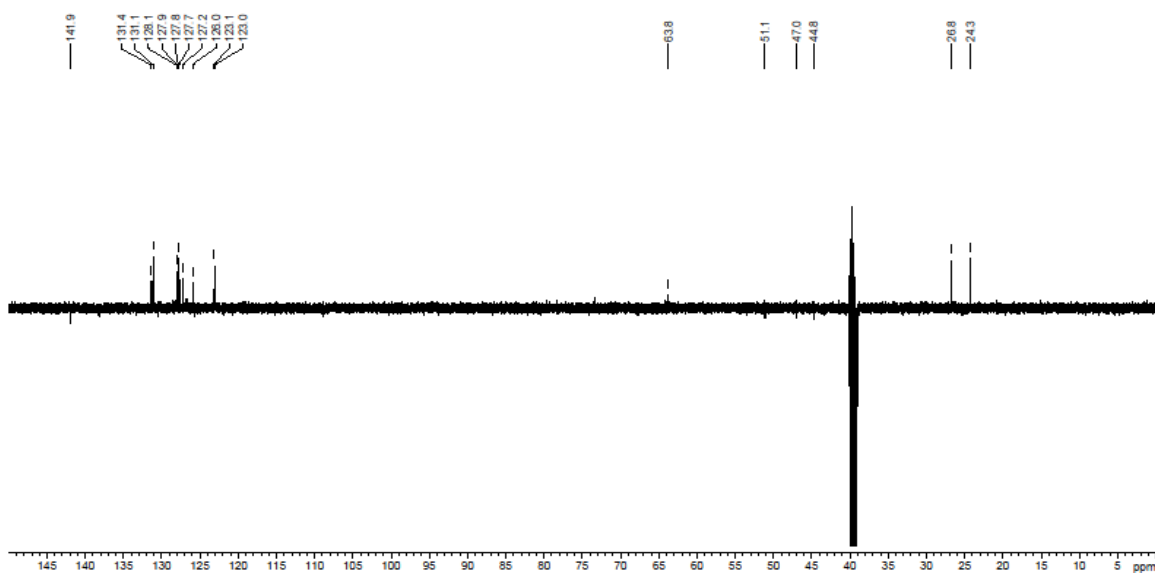

**Figure S98.** <sup>13</sup>C NMR (125 MHz) spectrum of **20w** in DMSO-*d*<sub>6</sub>

***N*<sup>1</sup>-[(1'*R*)-2-(4-chlorophenyl)-1-phenylethyl]-*N*<sup>2</sup>-(2,6-di(propan-2-yl)phenyl)ethane-1,2-diamine [(1'*R*)-20x]**

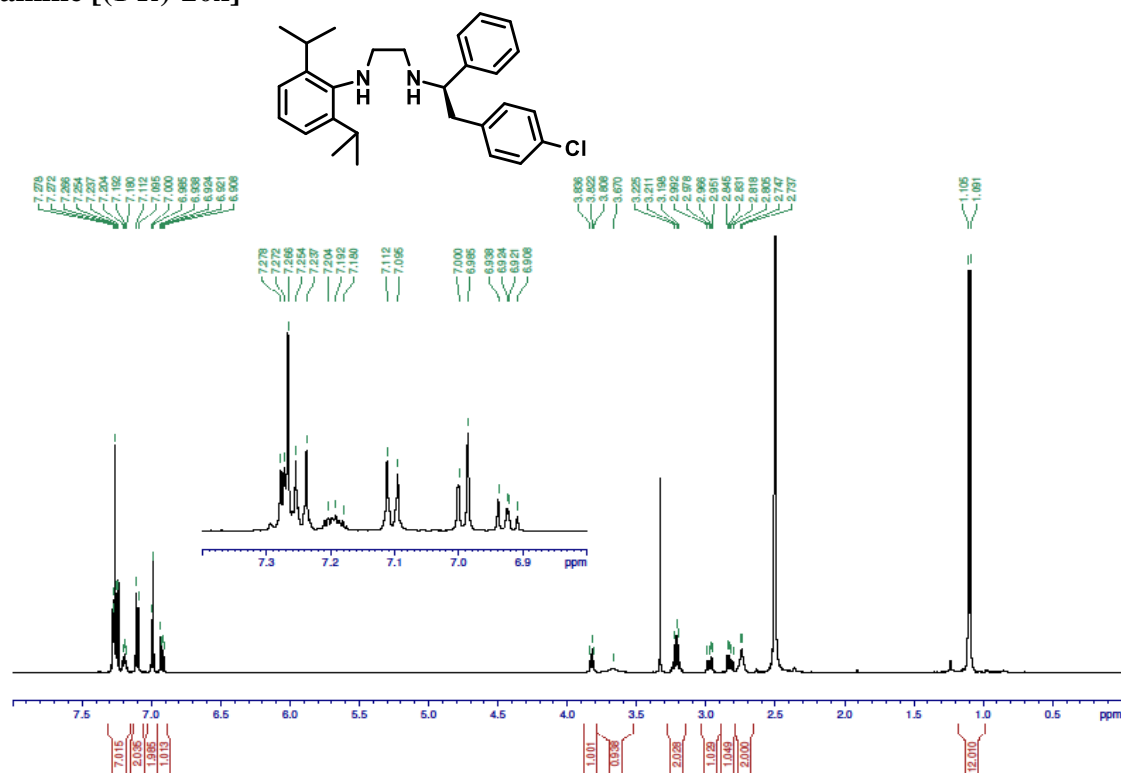

**Figure S99.** <sup>1</sup>H NMR (500 MHz) spectrum of **20x** in DMSO-*d*<sub>6</sub>

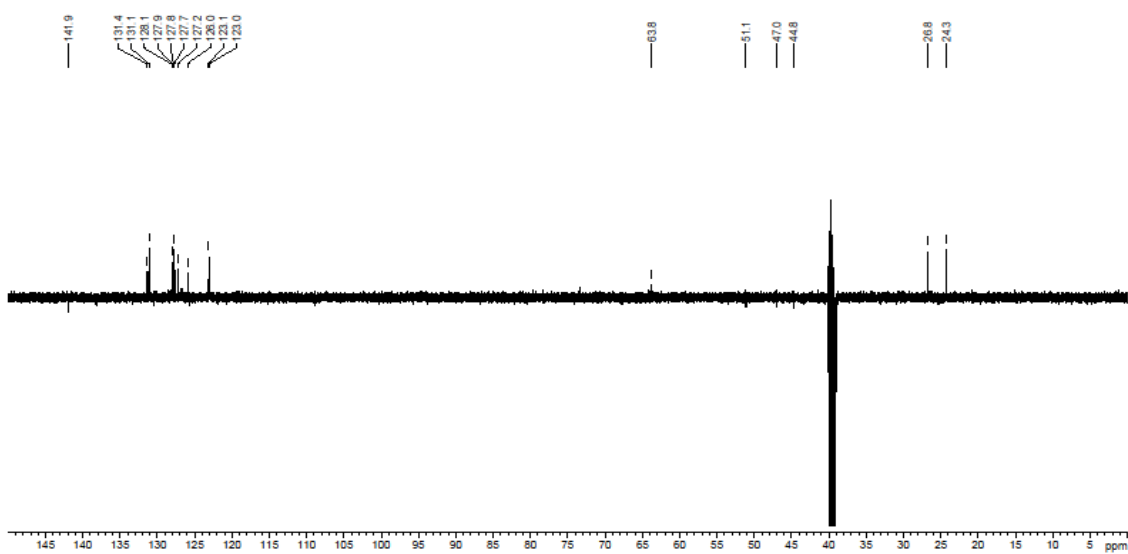

**Figure S100.** <sup>13</sup>C NMR (125 MHz) spectrum of **20x** in DMSO-*d*<sub>6</sub>

(2*S*)-*N*<sup>2</sup>-(2,6-di(propan-2-yl)phenyl)-3,3-dimethyl-*N*<sup>1</sup>-[(1'*S*)-1-(2-naphthyl)ethyl]butane-1,2-diamine [(2*S*,1'*S*)-20y]

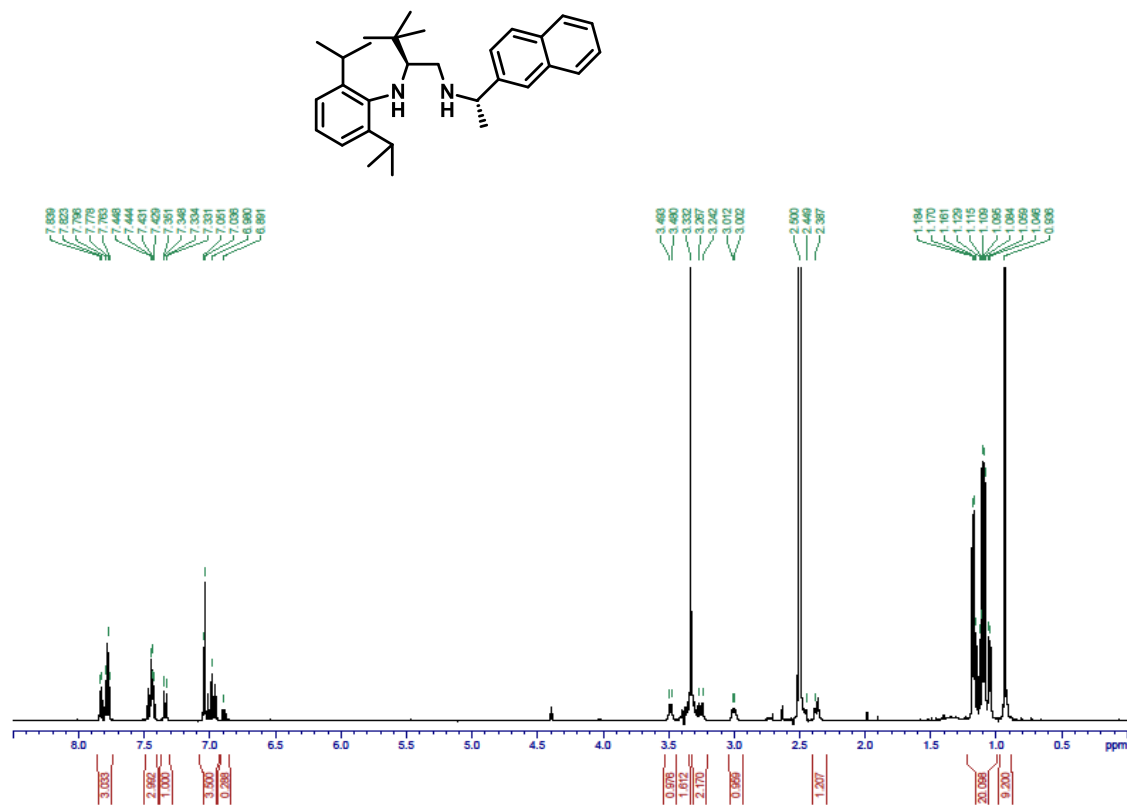

Figure S101. <sup>1</sup>H NMR (500 MHz) spectrum of **20y** in DMSO-*d*<sub>6</sub>

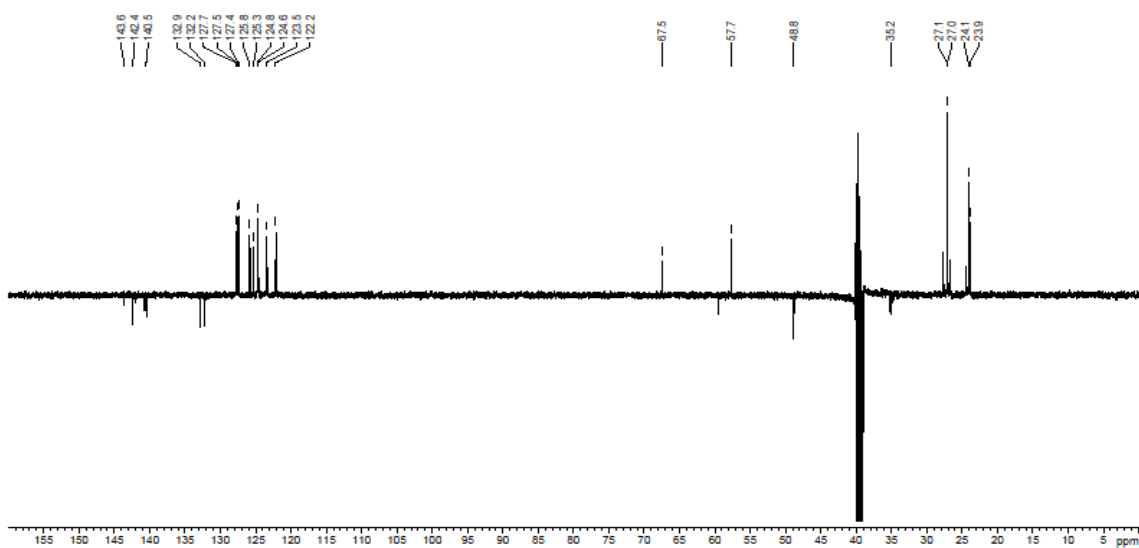

Figure S102. <sup>13</sup>C NMR (125 MHz) spectrum of **20y** in DMSO-*d*<sub>6</sub>

(2*S*)-*N*<sup>2</sup>-(2,6-di(propan-2-yl)phenyl)-3,3-dimethyl-*N*<sup>1</sup>-[(1'*R*)-1-(2-naphthyl)ethyl]butane-1,2-diamine [(2*S*,1'*R*)-20*z*]

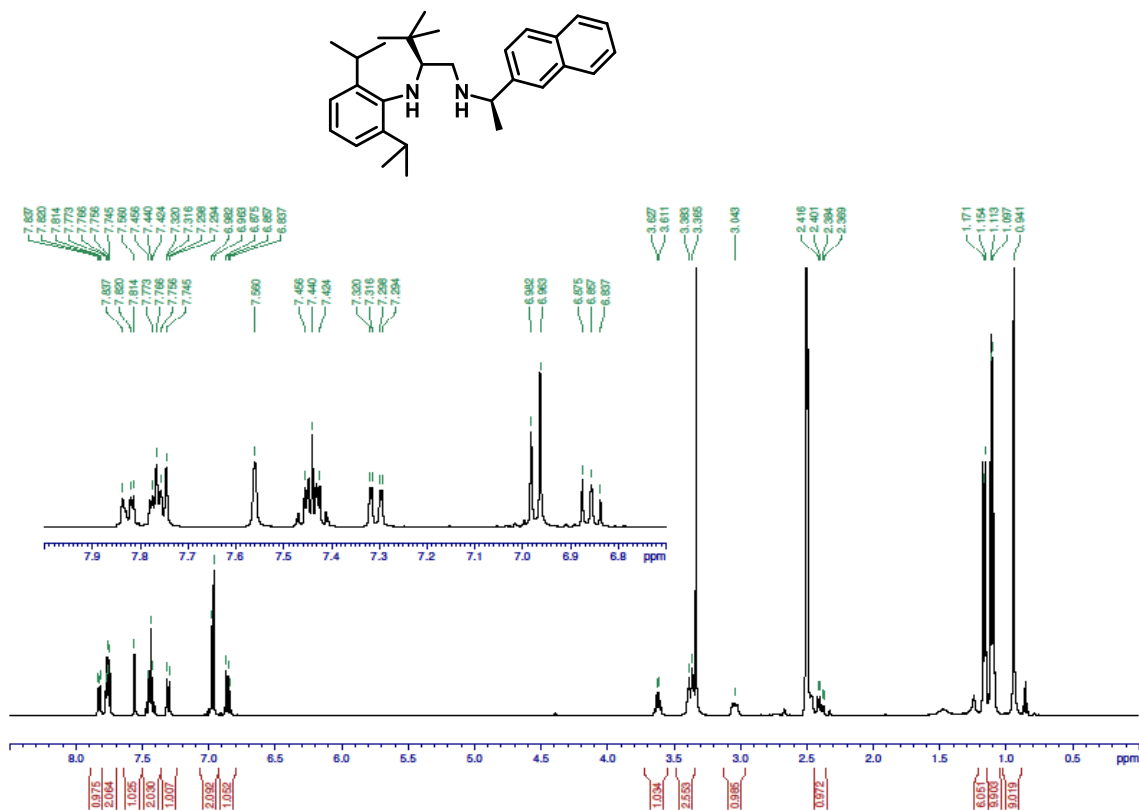

Figure S103. <sup>1</sup>H NMR (400 MHz) spectrum of **20z** in DMSO-*d*<sub>6</sub>

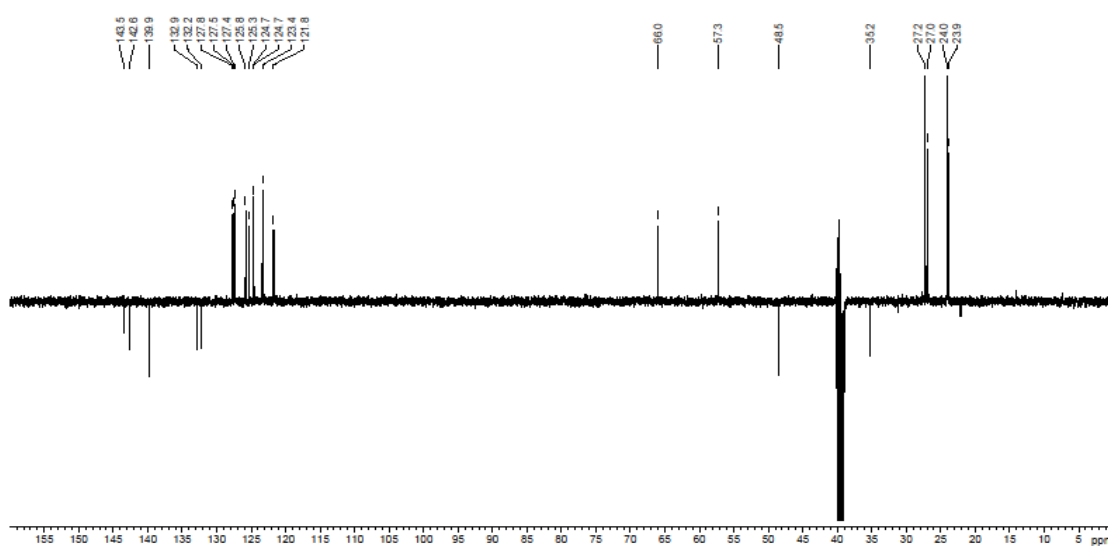

Figure S104. <sup>13</sup>C NMR (100 MHz) spectrum of **20z** in DMSO-*d*<sub>6</sub>

2-(3-chlorophenyl)-1-phenyl-ethanone (**21a**)

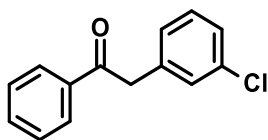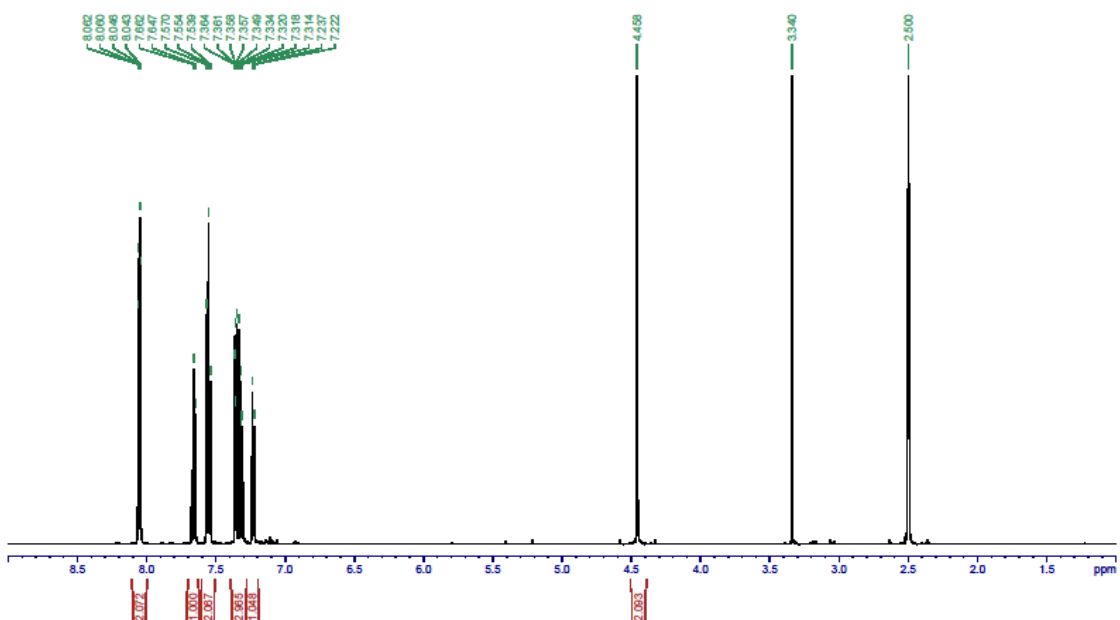

Figure S105. <sup>1</sup>H NMR (500 MHz) spectrum of **21a** in DMSO-*d*<sub>6</sub>

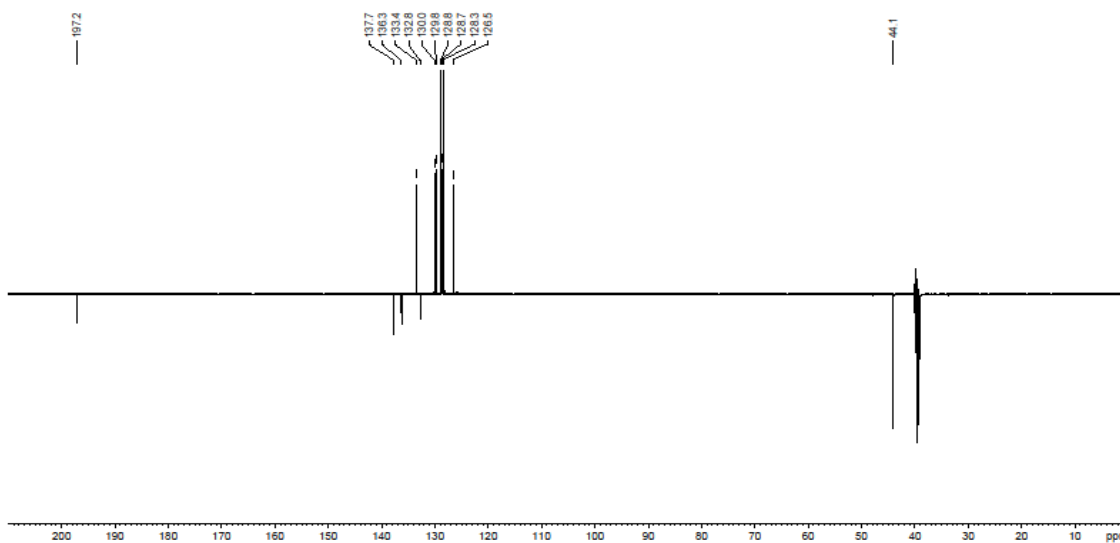

Figure S106. <sup>13</sup>C NMR (125 MHz) spectrum of **21a** in DMSO-*d*<sub>6</sub>

2-phenyl-1-[3-(trifluoromethyl)phenyl]ethanone (21b)

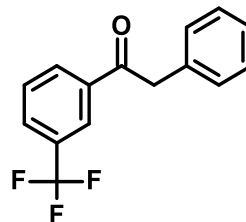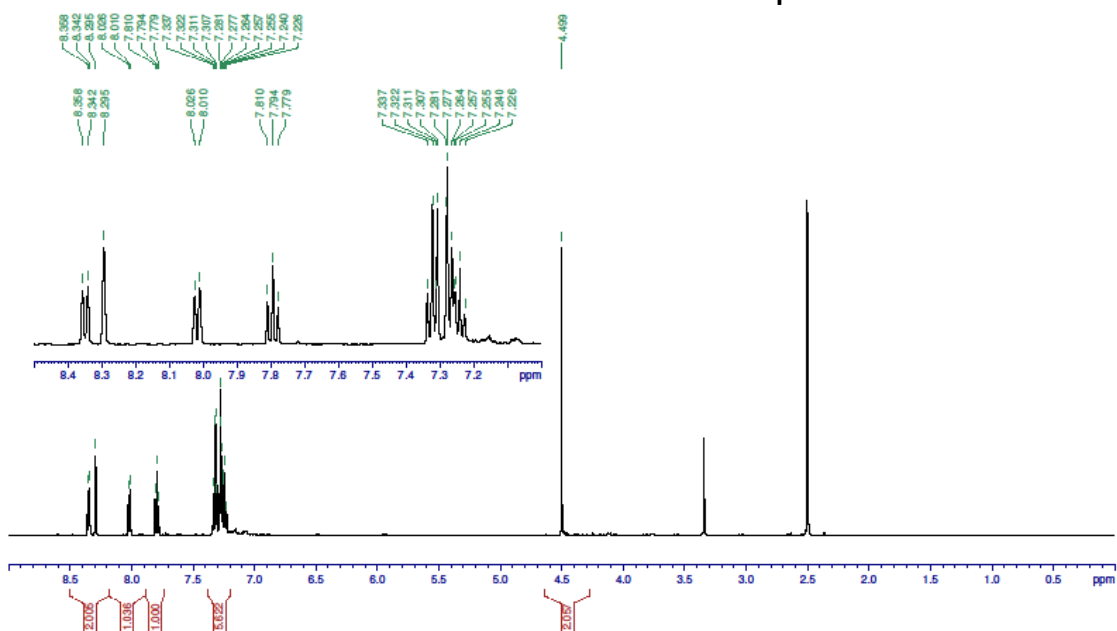

Figure S107.  $^1\text{H}$  NMR (500 MHz) spectrum of **21b** in  $\text{DMSO-}d_6$

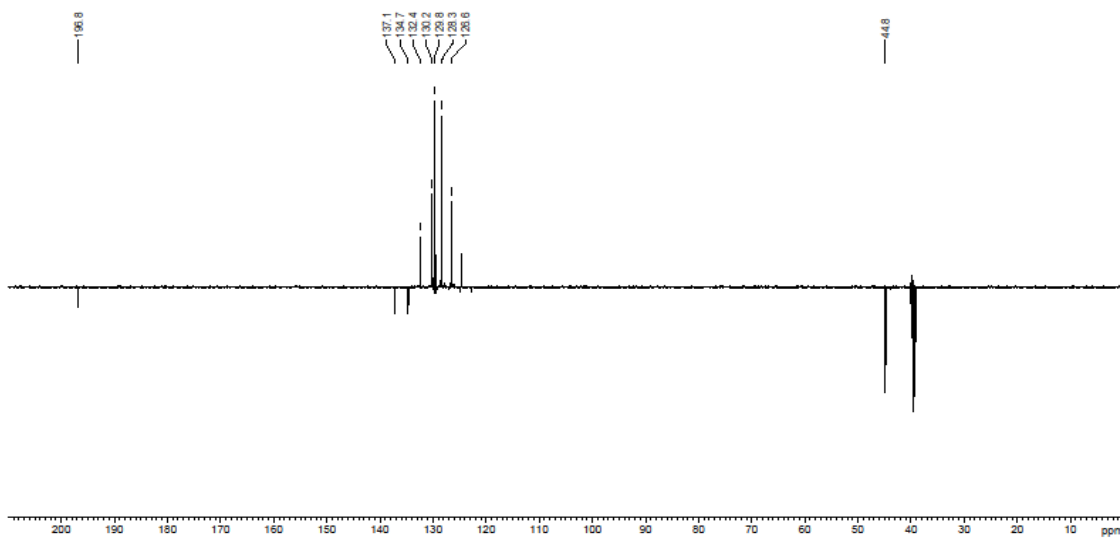

Figure S108.  $^{13}\text{C}$  NMR (125 MHz) spectrum of **21b** in  $\text{DMSO-}d_6$

**1-(2-methoxyphenyl)-2-phenyl-ethanone (21c)**

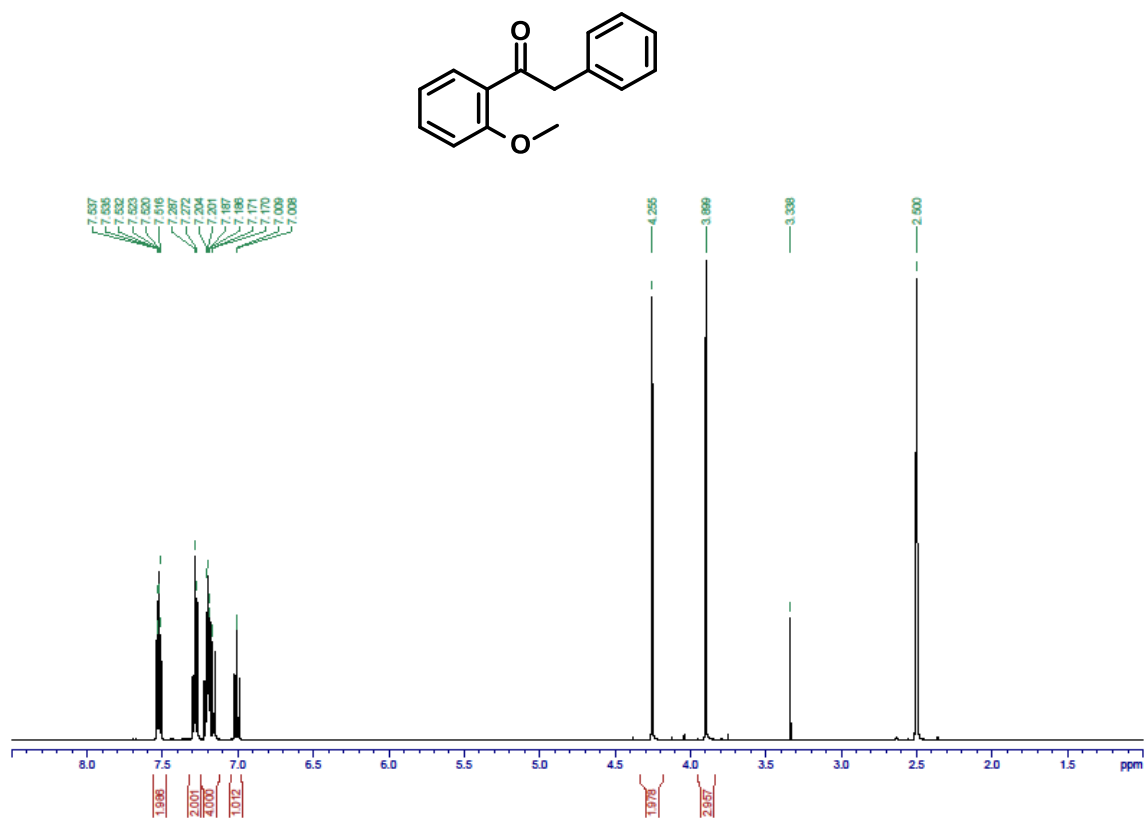

**Figure S109.** <sup>1</sup>H NMR (500 MHz) spectrum of **21c** in DMSO-*d*<sub>6</sub>

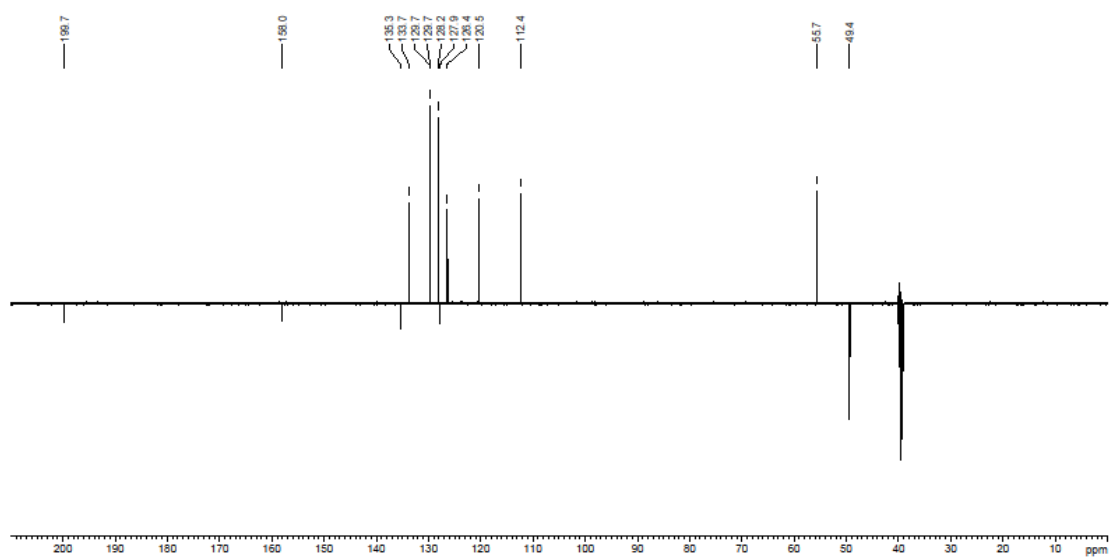

**Figure S110.** <sup>13</sup>C NMR (125 MHz) spectrum of **21c** in DMSO-*d*<sub>6</sub>



**1-(3-methoxyphenyl)-2-phenyl-ethanone (21d)**

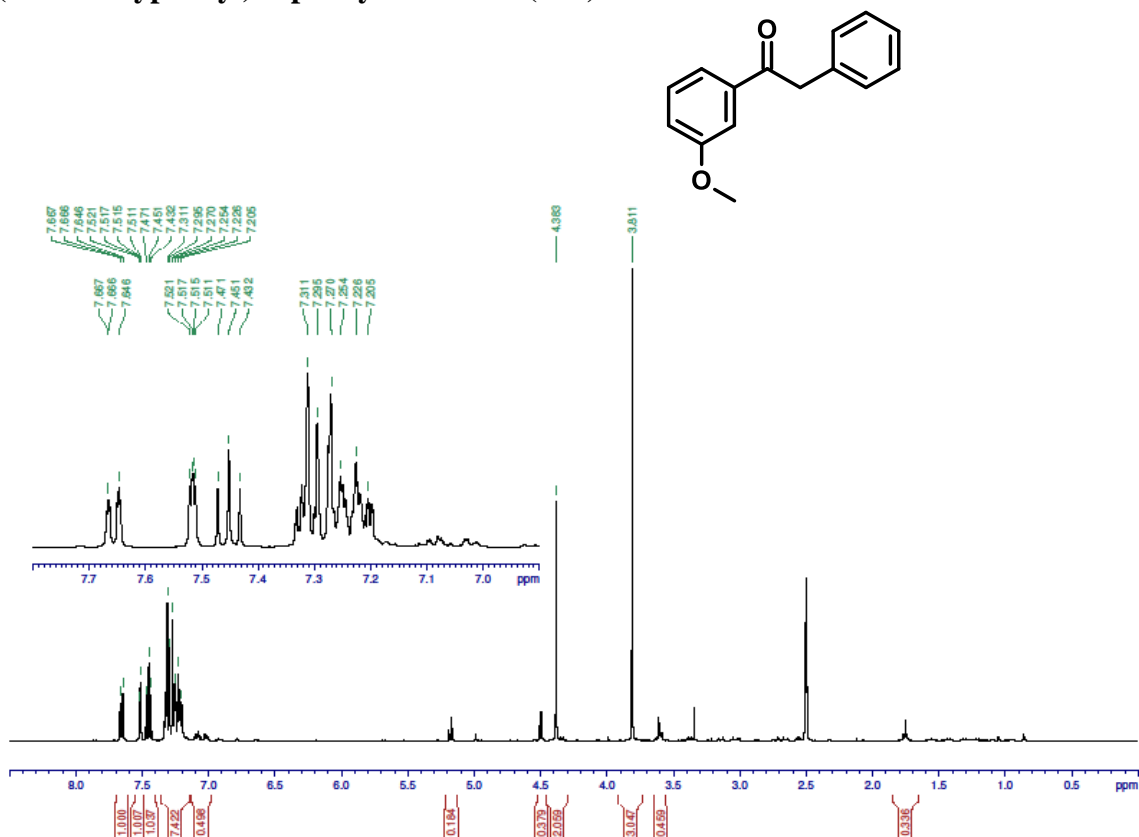

**Figure S111.** <sup>1</sup>H NMR (400 MHz) spectrum of **21d** in DMSO-*d*<sub>6</sub>

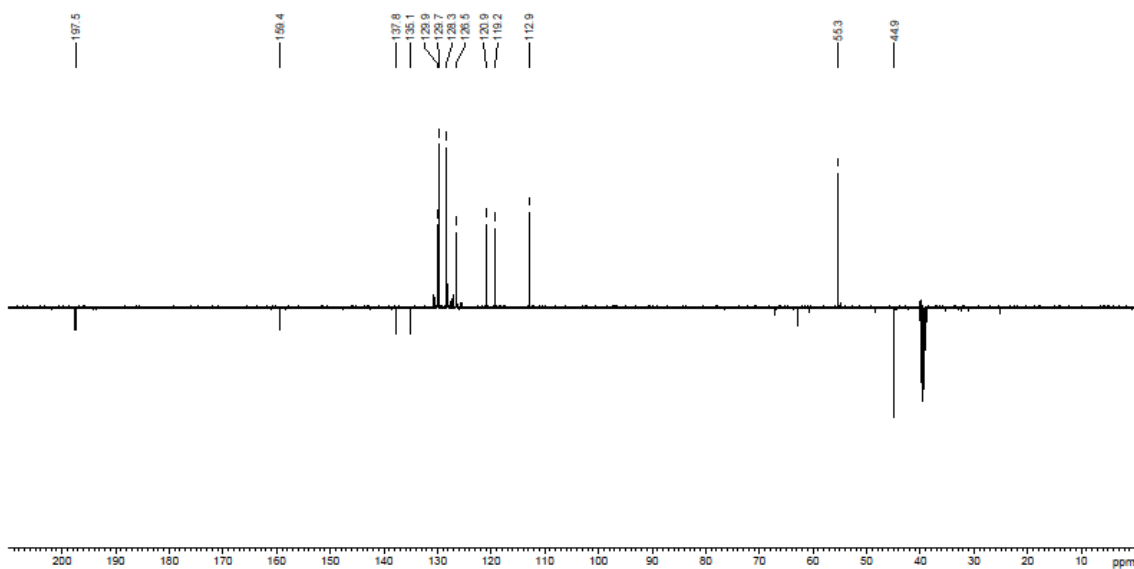

**Figure S112.** <sup>13</sup>C NMR (100 MHz) spectrum of **21d** in DMSO-*d*<sub>6</sub>

**1-(4-methoxyphenyl)-2-phenyl-ethanone (21e)**

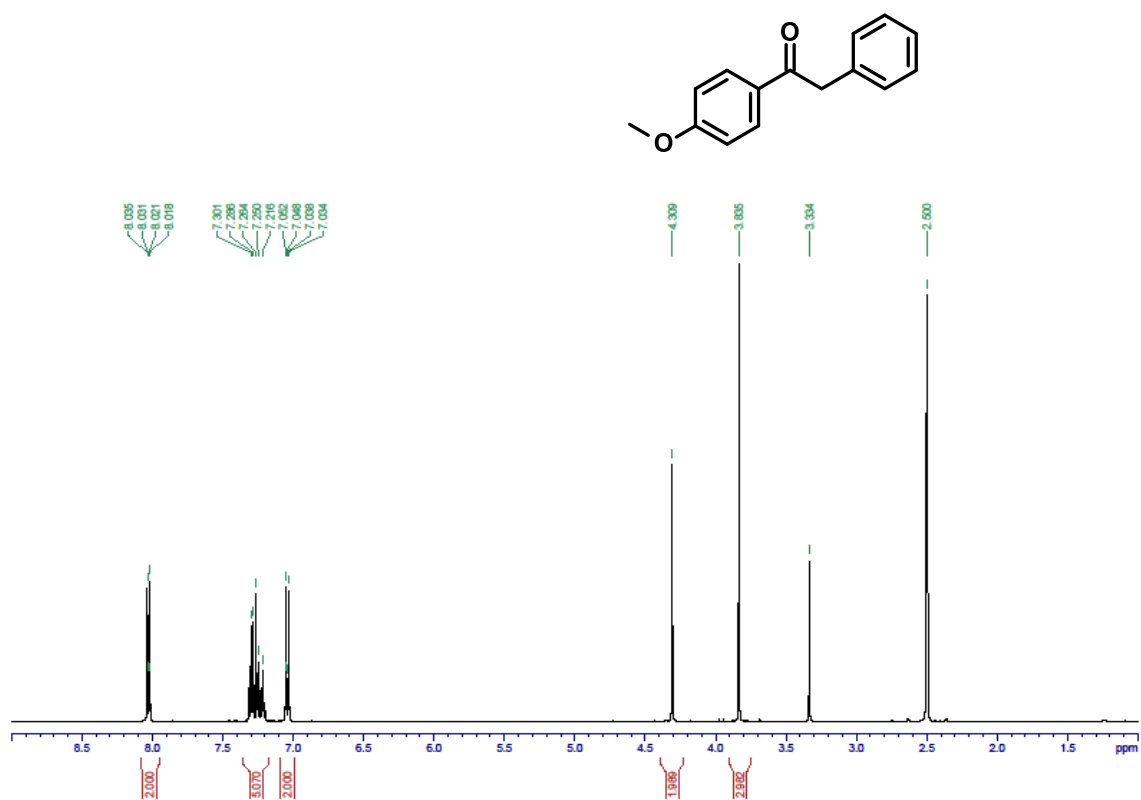

**Figure S113.** <sup>1</sup>H NMR (500 MHz) spectrum of **21e** in DMSO-*d*<sub>6</sub>

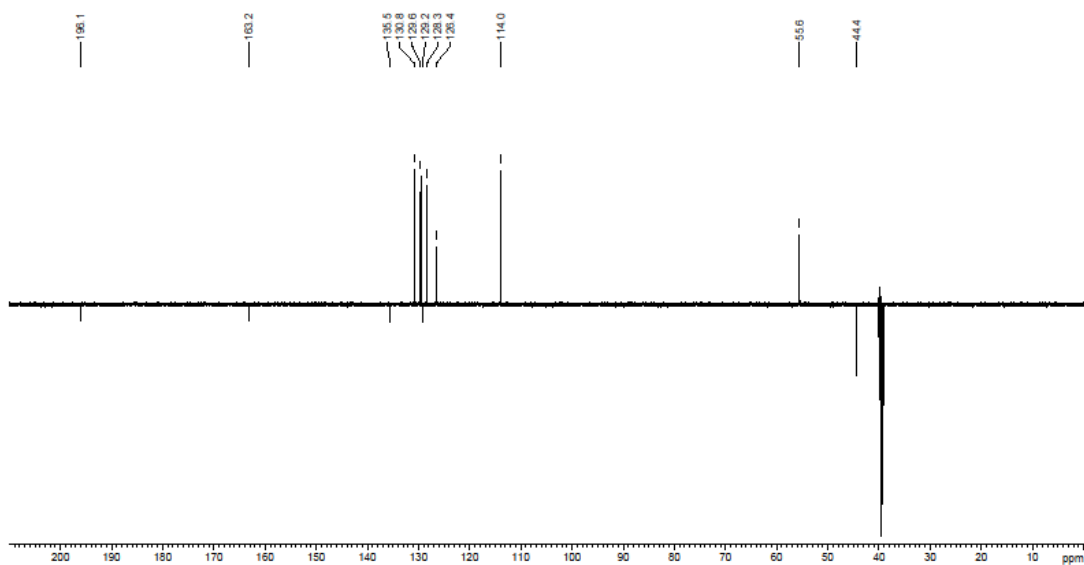

**Figure S114.** <sup>13</sup>C NMR (125 MHz) spectrum of **21e** in DMSO-*d*<sub>6</sub>

**1-(o-tolyl)-2-phenyl-ethanone (21f)**

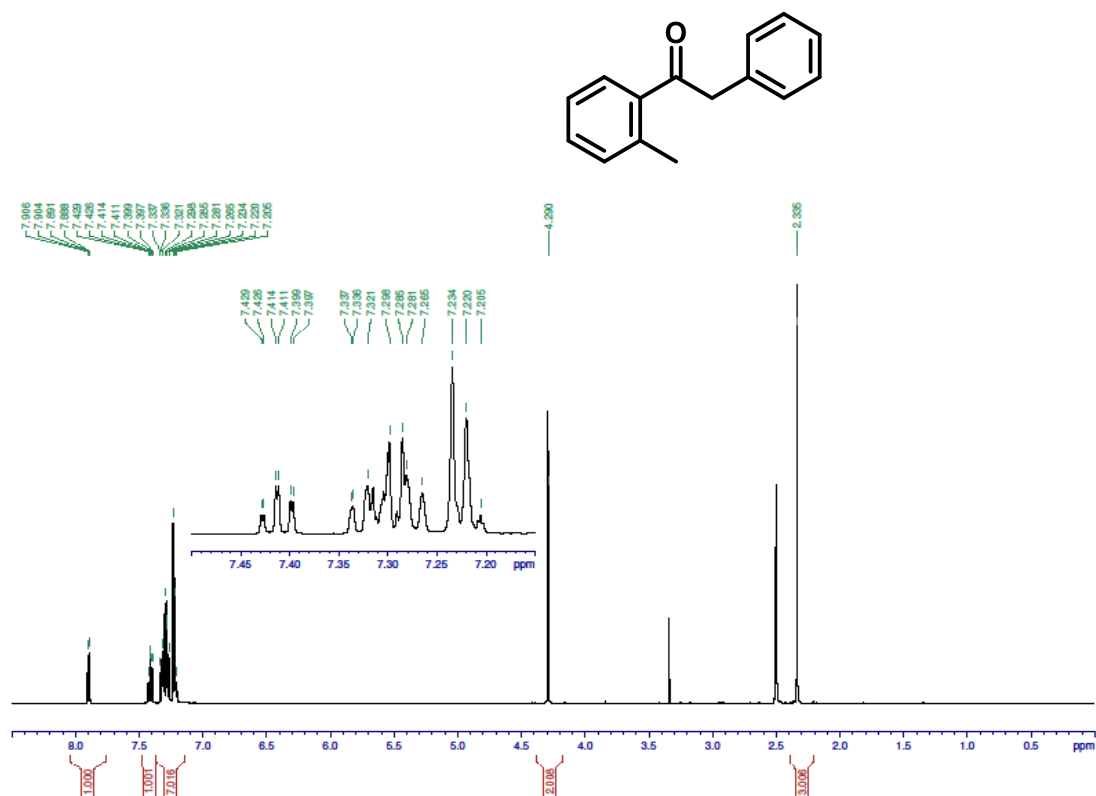

**Figure S115.** <sup>1</sup>H NMR (500 MHz) spectrum of **21f** in DMSO-*d*<sub>6</sub>

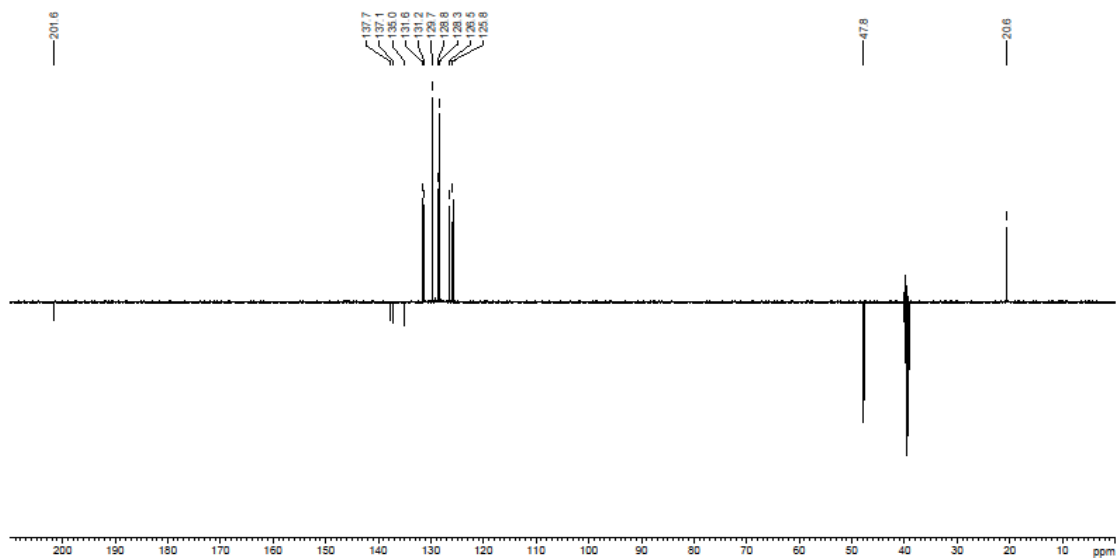

**Figure S116.** <sup>13</sup>C NMR (125 MHz) spectrum of **21f** in DMSO-*d*<sub>6</sub>

2-phenyl-1-(p-tolyl)ethanone (21g)

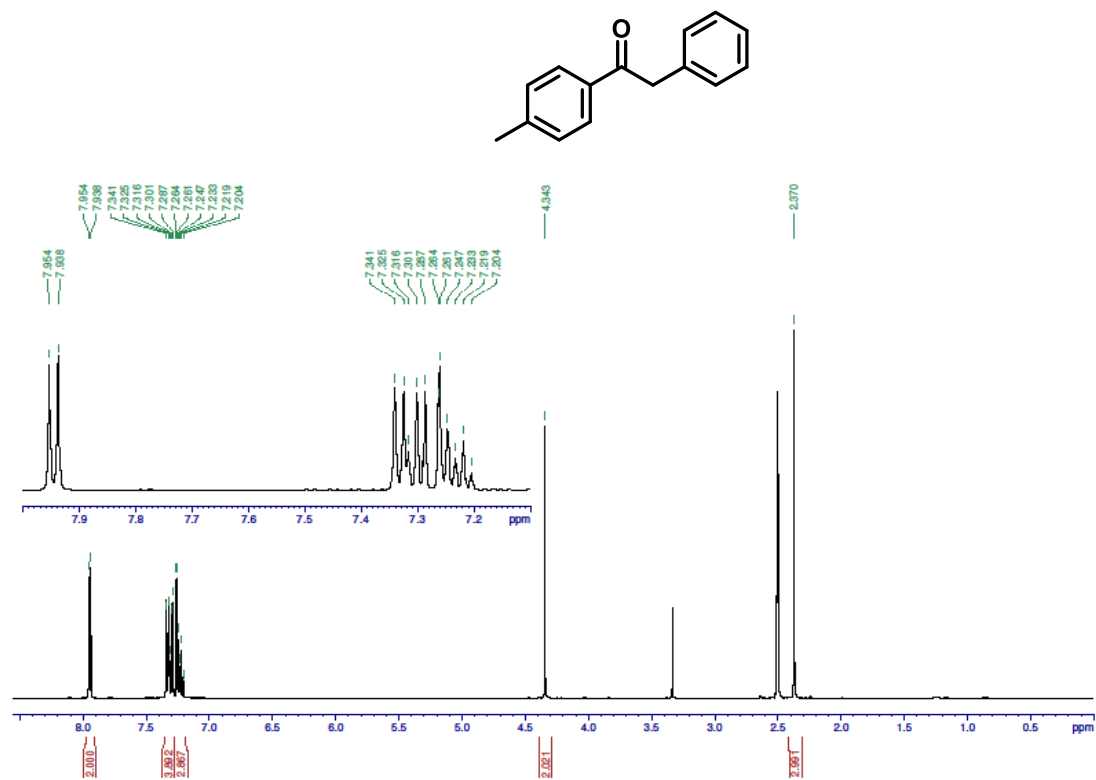

Figure S117. <sup>1</sup>H NMR (500 MHz) spectrum of **21g** in DMSO-*d*<sub>6</sub>

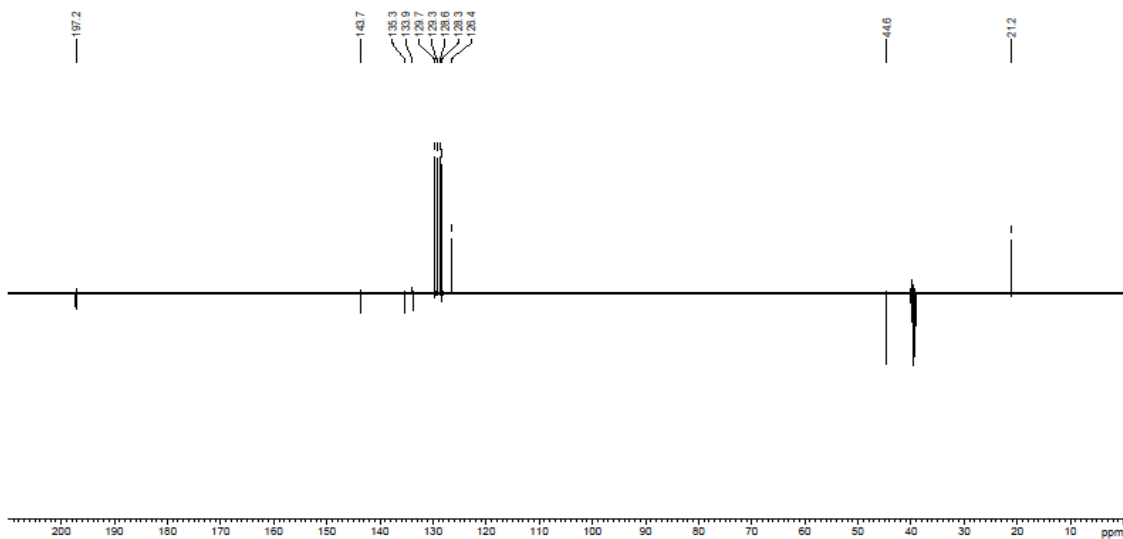

Figure S118. <sup>13</sup>C NMR (125 MHz) spectrum of **21g** in DMSO-*d*<sub>6</sub>

2-phenyl-1-[4-(trifluoromethyl)phenyl]ethanone (21h)

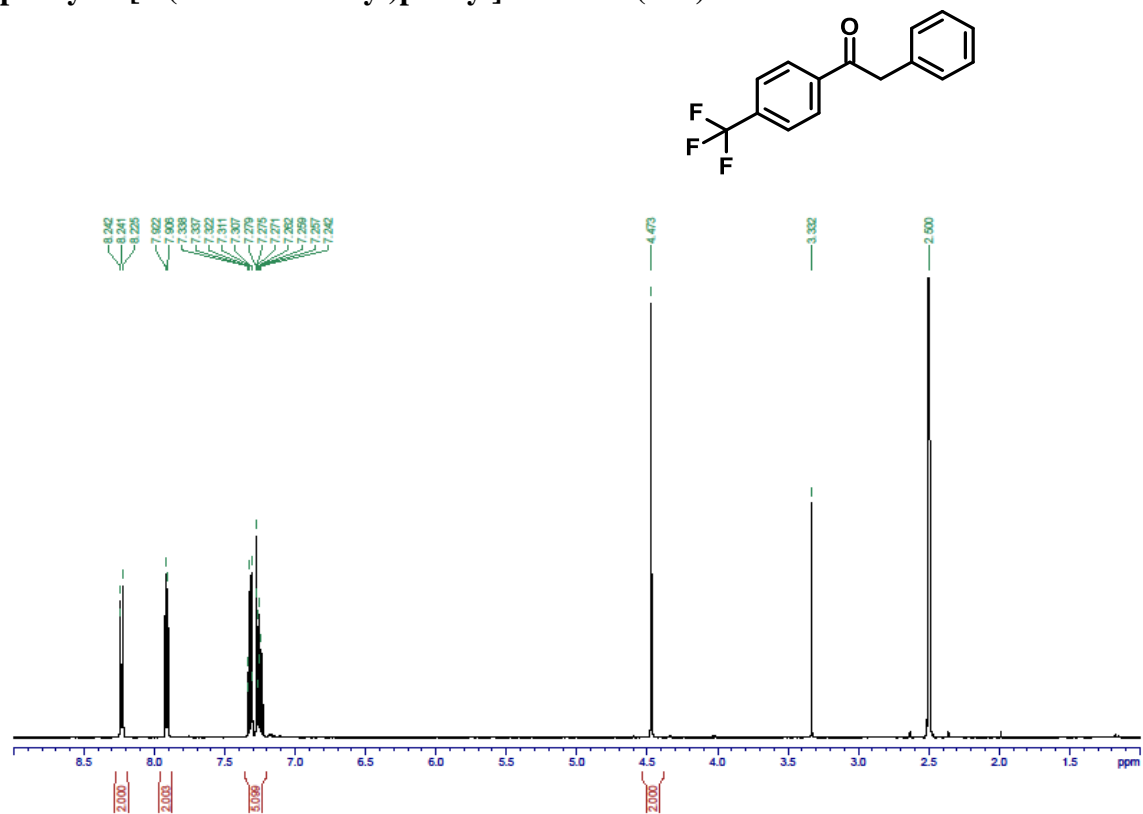

Figure S119. <sup>1</sup>H NMR (500 MHz) spectrum of **21h** in DMSO-*d*<sub>6</sub>

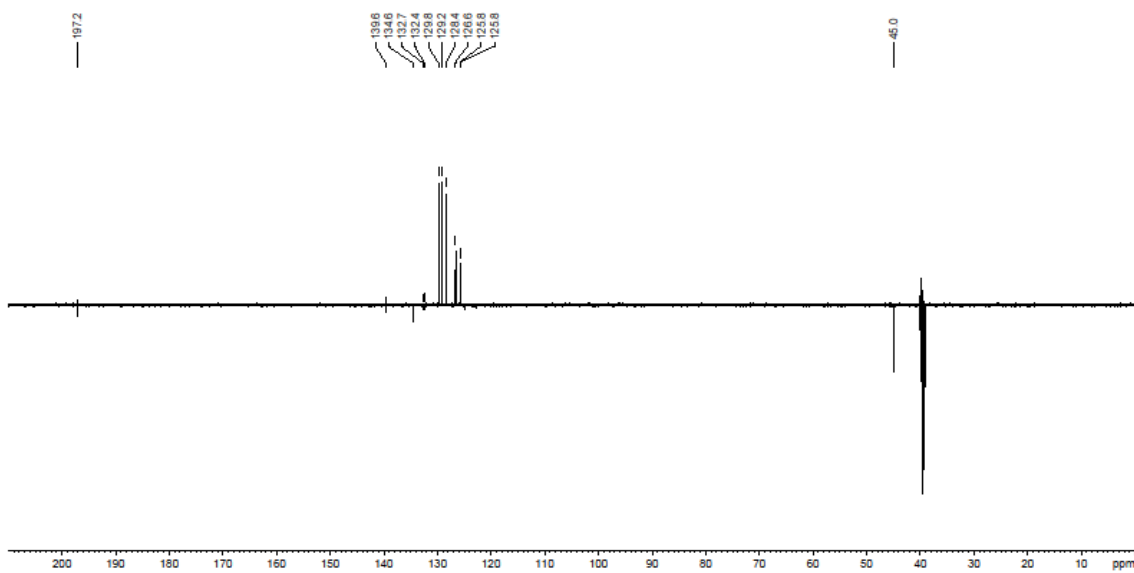

Figure S120. <sup>13</sup>C NMR (125 MHz) spectrum of **21h** in DMSO-*d*<sub>6</sub>

1-phenyl-2-(p-tolyl)ethanone (21i)

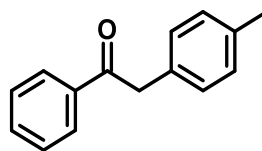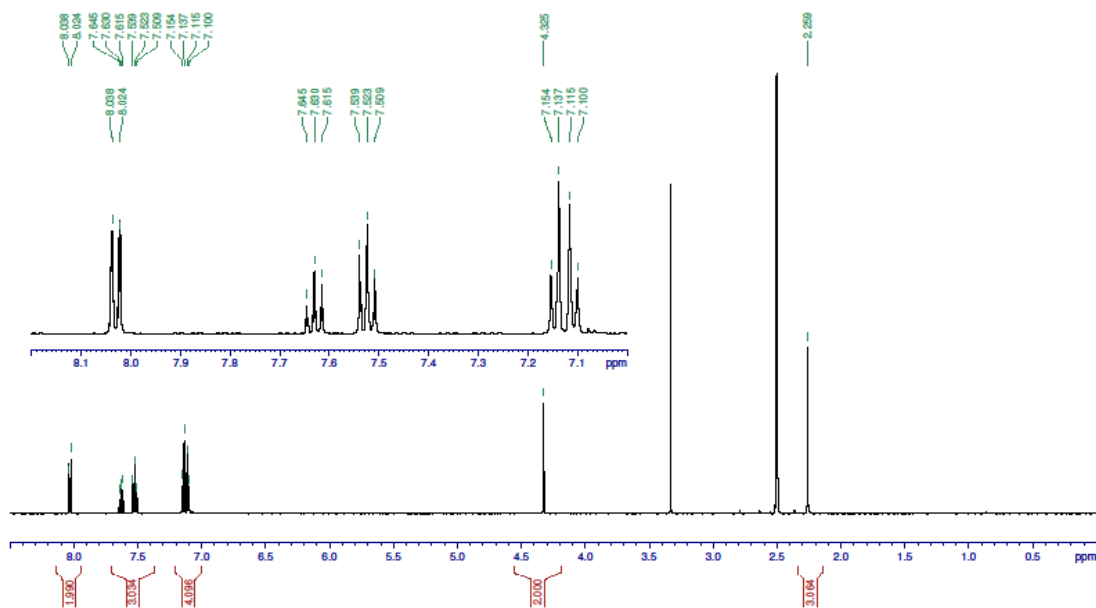

Figure S121. <sup>1</sup>H NMR (500 MHz) spectrum of **21i** in DMSO-*d*<sub>6</sub>

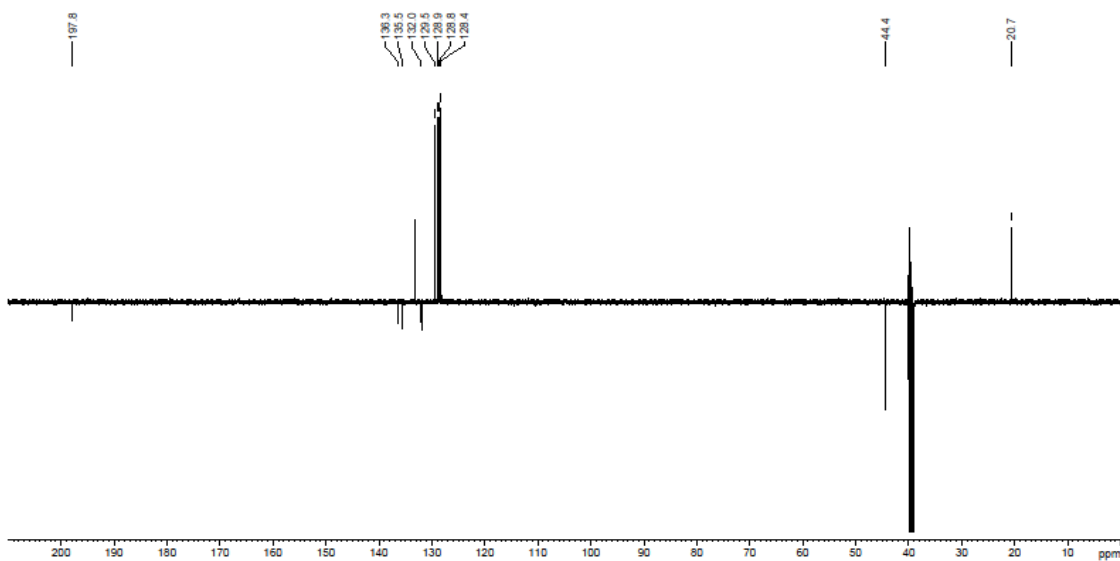

Figure S122. <sup>13</sup>C NMR (125 MHz) spectrum of **21i** in DMSO-*d*<sub>6</sub>

2-(4-chlorophenyl)-1-phenyl-ethanone (21j)

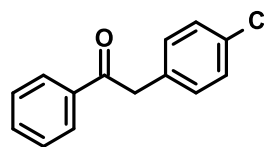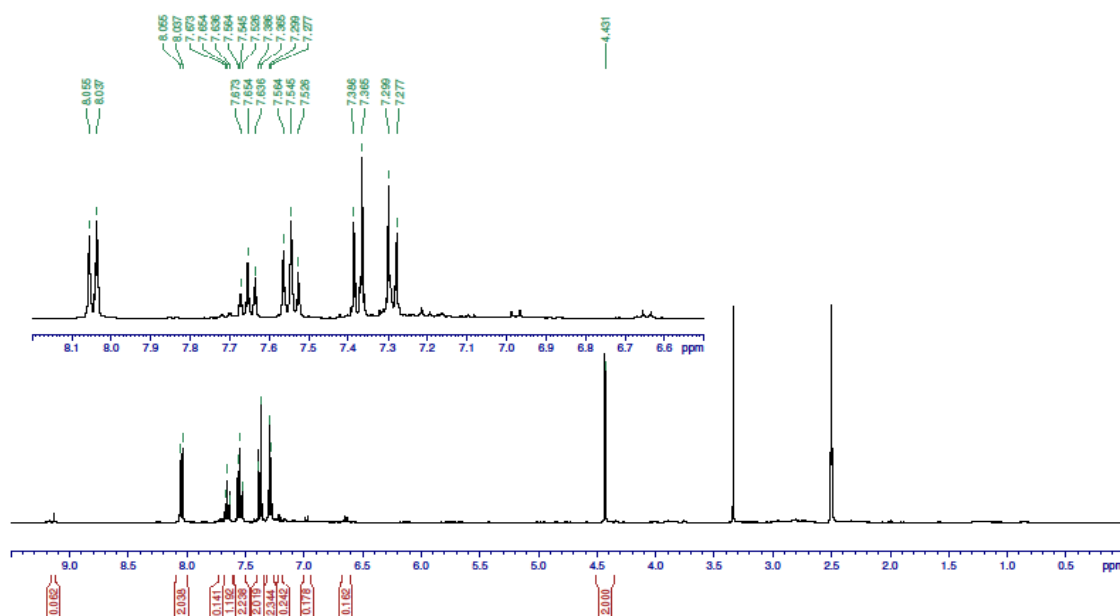

**Figure S123.** <sup>1</sup>H NMR (400 MHz) spectrum of **21j** in DMSO-*d*<sub>6</sub>

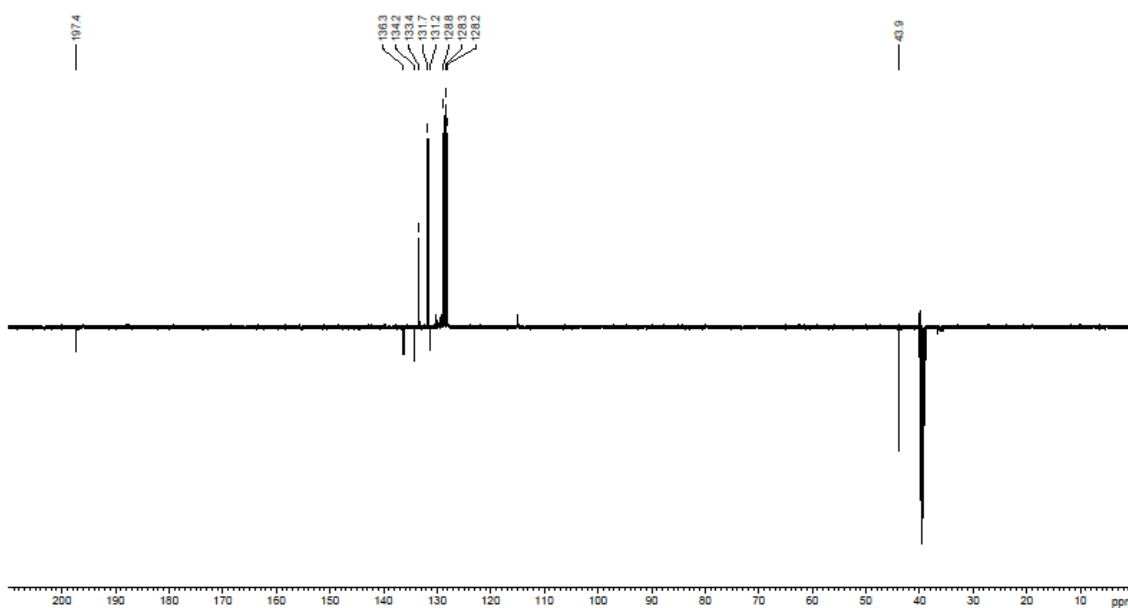

**Figure S124.** <sup>13</sup>C NMR (100 MHz) spectrum of **21j** in DMSO-*d*<sub>6</sub>

2-(2-chlorophenyl)-1-phenyl-ethanone (**21k**)

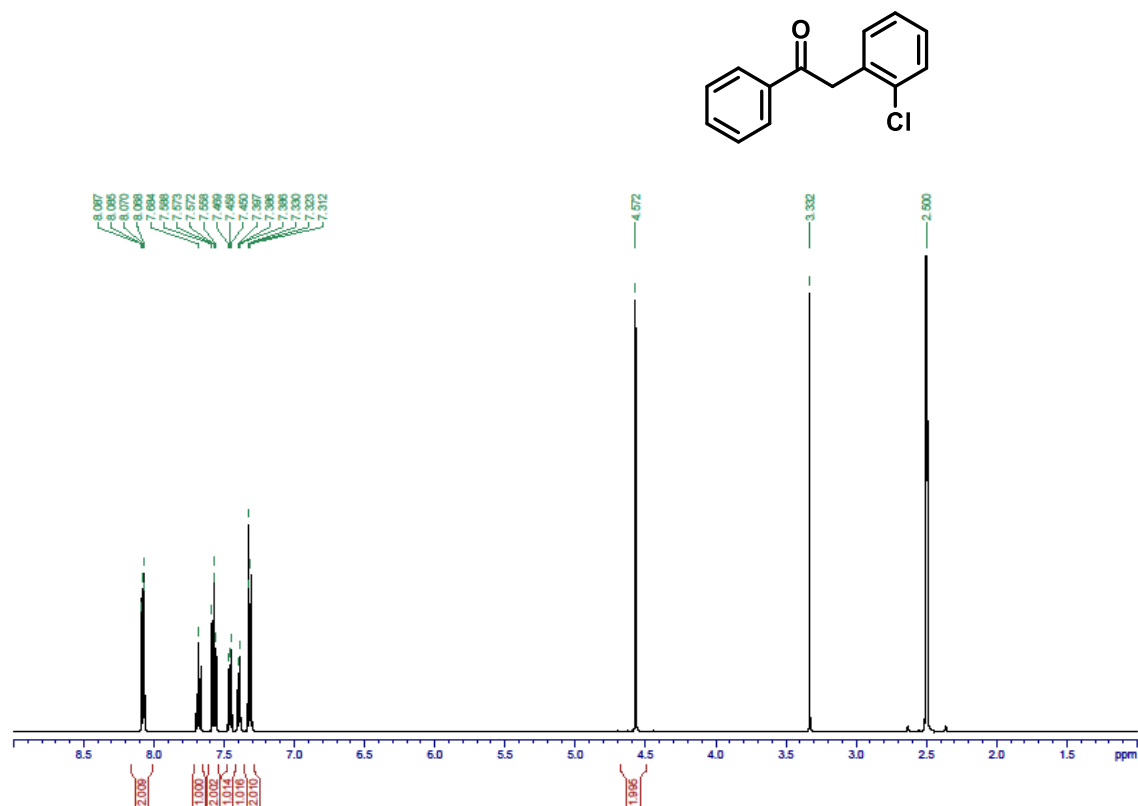

Figure S125. <sup>1</sup>H NMR (500 MHz) spectrum of **21k** in DMSO-*d*<sub>6</sub>

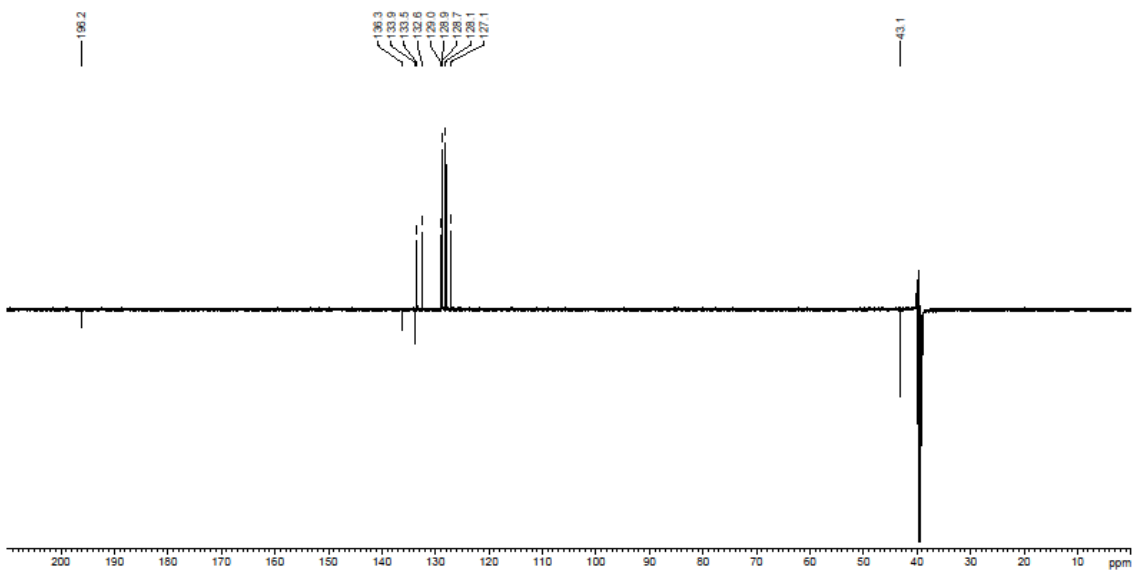

Figure S126. <sup>13</sup>C NMR (125 MHz) spectrum of **21k** in DMSO-*d*<sub>6</sub>



2-(2-chlorophenyl)-1-phenyl-ethanol (**22**)

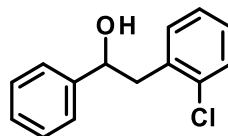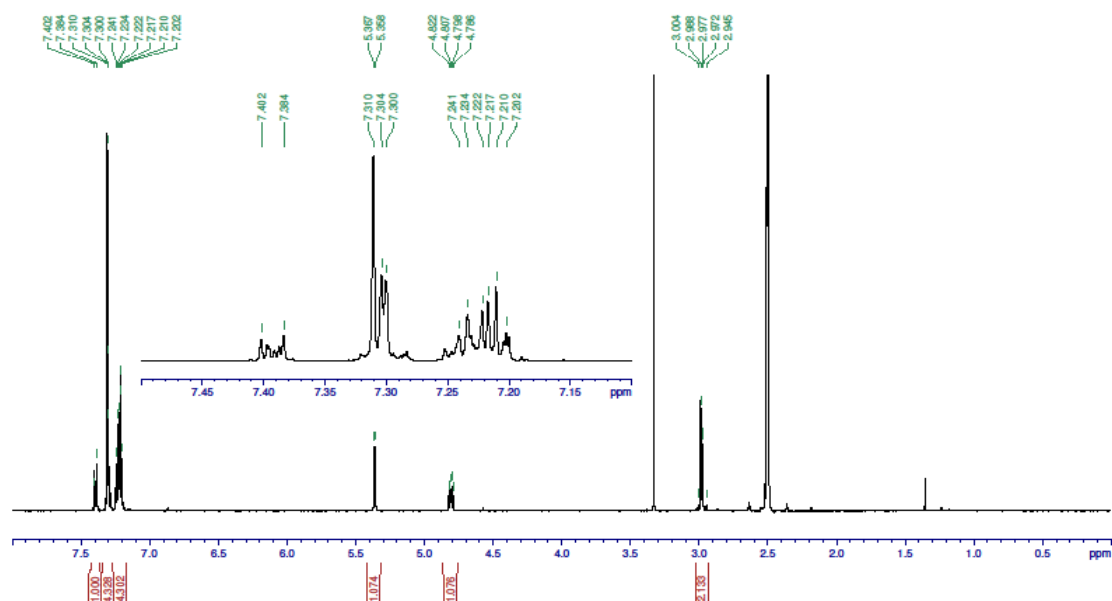

Figure S127.  $^1\text{H}$  NMR (500 MHz) spectrum of **22** in  $\text{DMSO-}d_6$

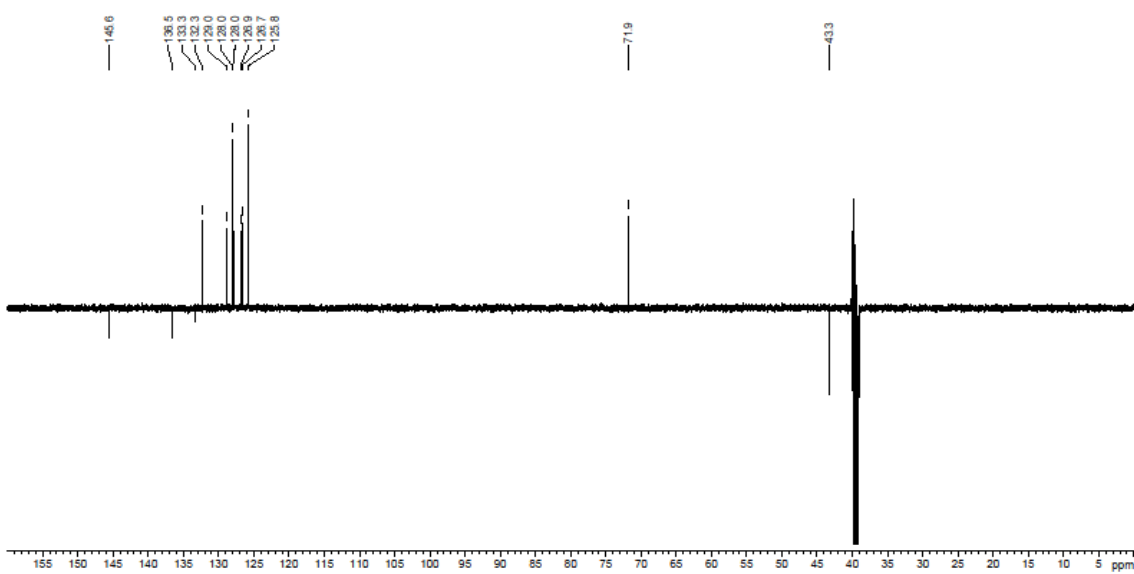

Figure S128.  $^{13}\text{C}$  NMR (125 MHz) spectrum of **22** in  $\text{DMSO-}d_6$

*tert*-butyl-[*tert*-butoxycarbonyl-[2-(2-chlorophenyl)-1-phenylethyl]- $\text{I}^{\wedge}\{3\}$ -oxidanyl]formate (**23**)

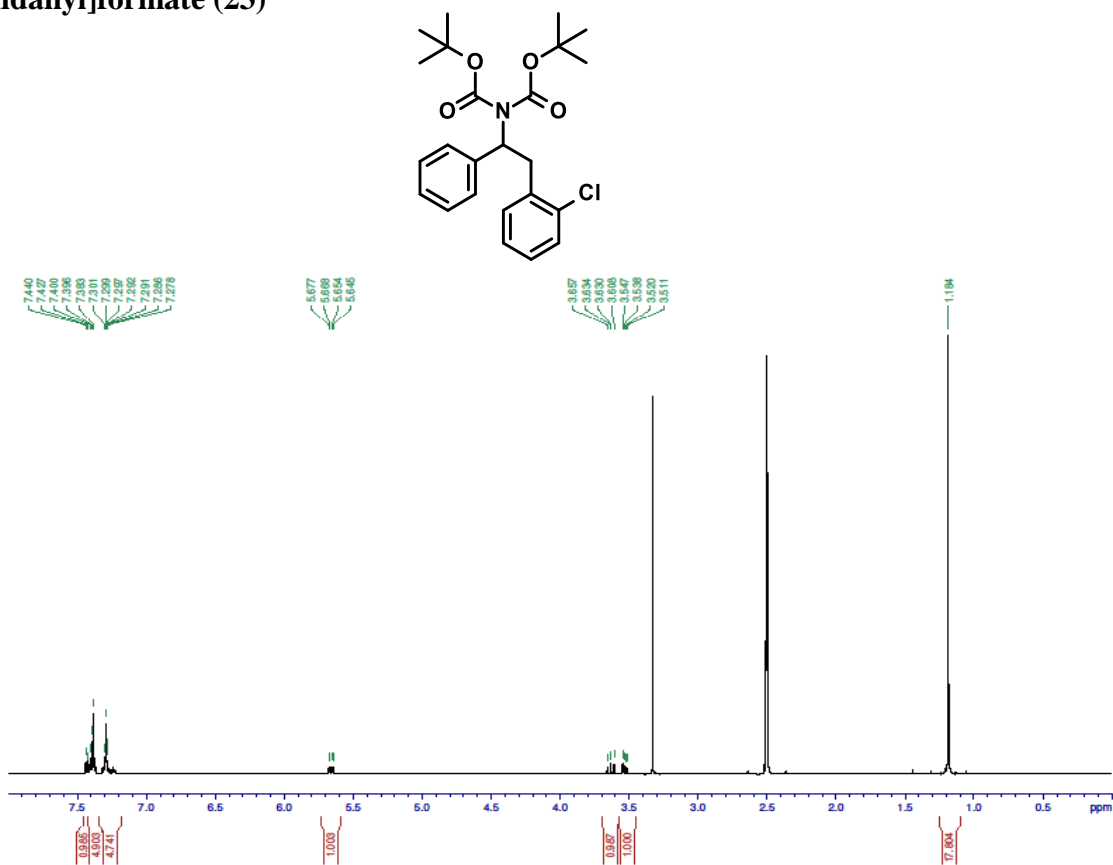

**Figure S129.**  $^1\text{H}$  NMR (500 MHz) spectrum of **23** in  $\text{DMSO-}d_6$

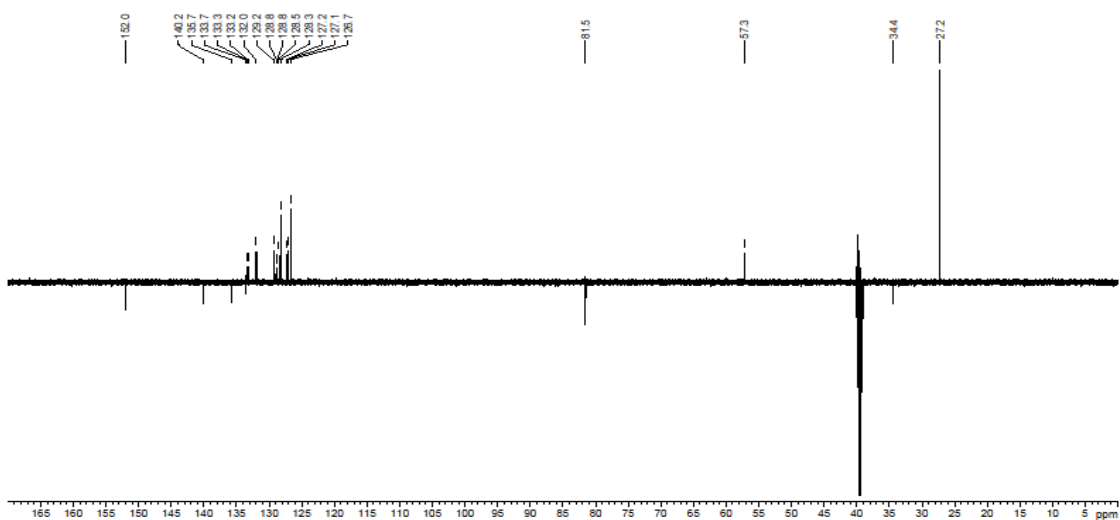

**Figure S130.**  $^{13}\text{C}$  NMR (125 MHz) spectrum of **23** in  $\text{DMSO-}d_6$

(1S)-2-(2-chlorophenyl)-1-phenyl-ethanamine [(1S)-24a]

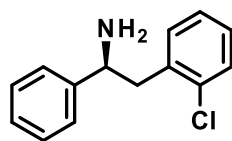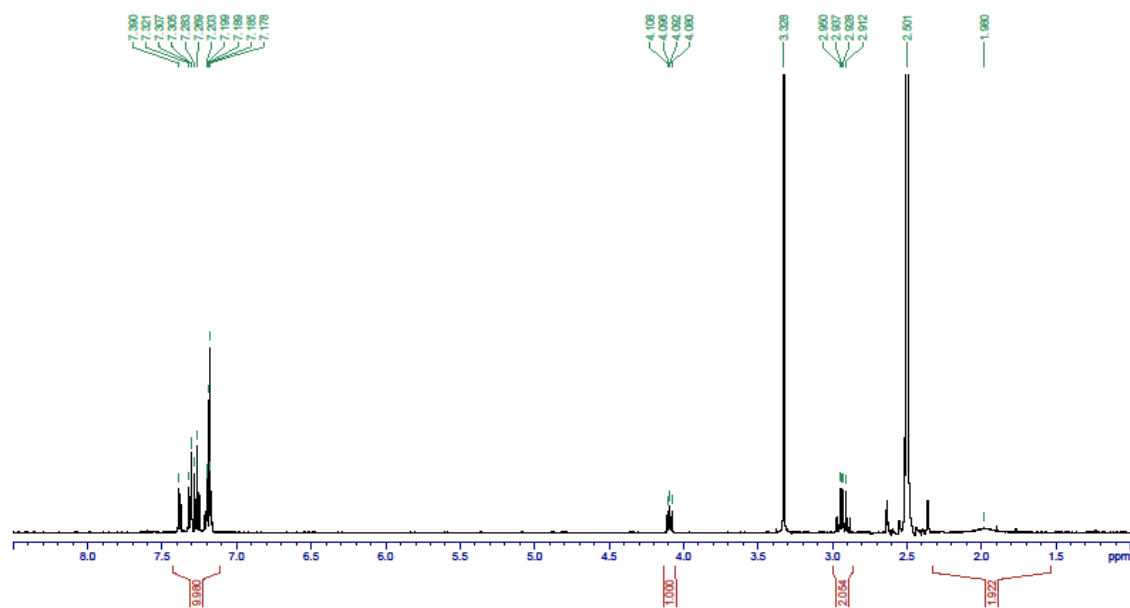

Figure S131.  $^1\text{H}$  NMR (500 MHz) spectrum of **24a** in  $\text{DMSO-}d_6$

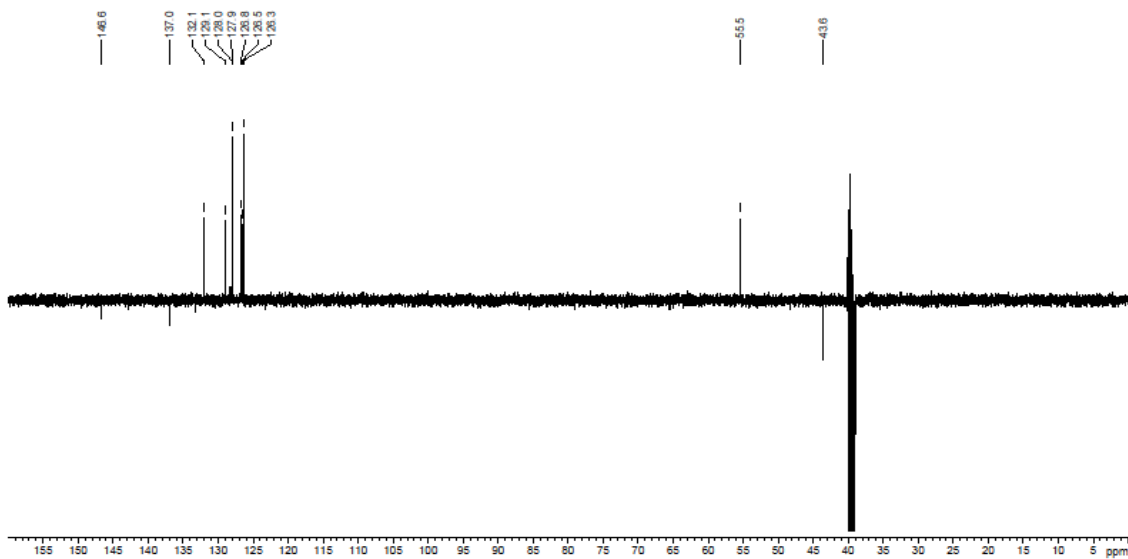

Figure S132.  $^{13}\text{C}$  NMR (125 MHz) spectrum of **24a** in  $\text{DMSO-}d_6$

**(1*R*)-2-(2-chlorophenyl)-1-phenyl-ethanamine [(1*R*)-24b]**

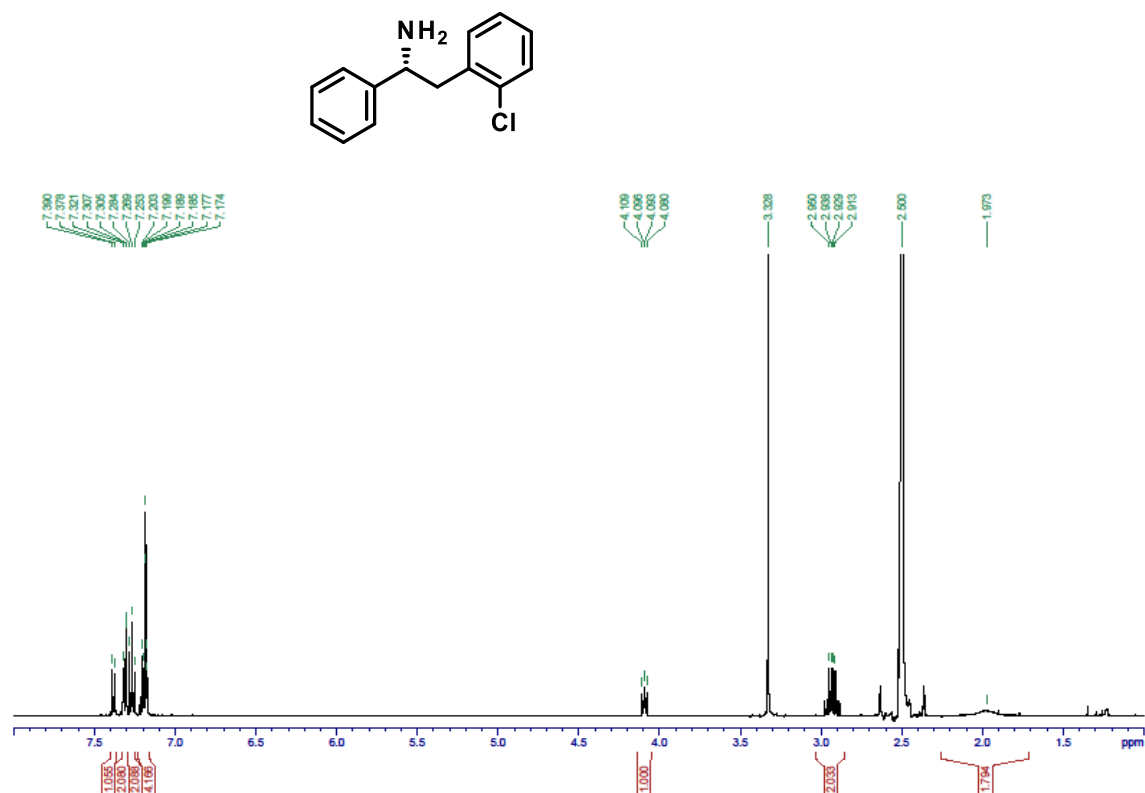

**Figure S133.** <sup>1</sup>H NMR (500 MHz) spectrum of **24b** in DMSO-*d*<sub>6</sub>

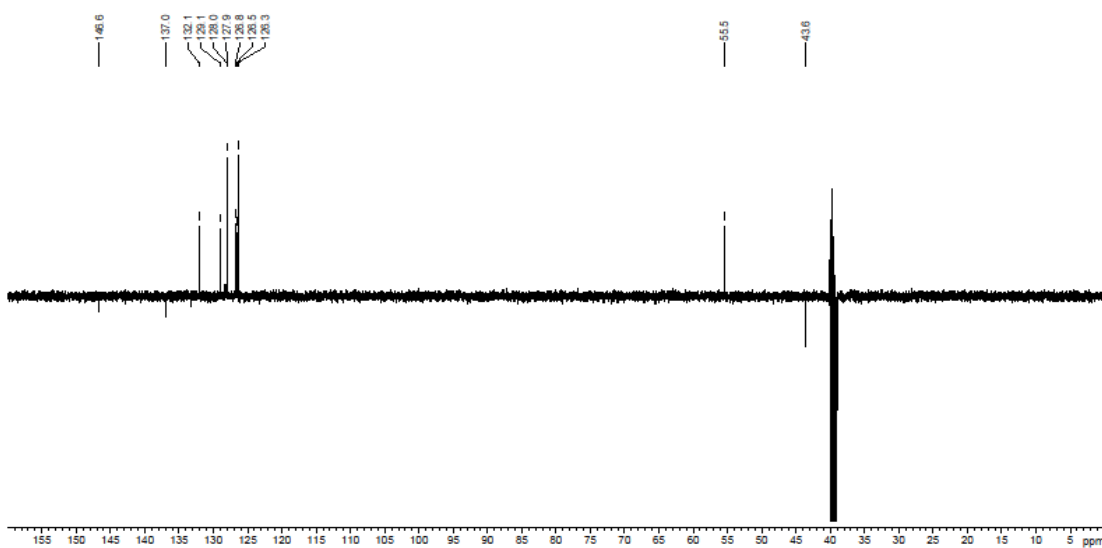

**Figure S134.** <sup>13</sup>C NMR (125 MHz) spectrum of **24b** in DMSO-*d*<sub>6</sub>

### 3 HPLC chromatograms performed with optically active stationary phase

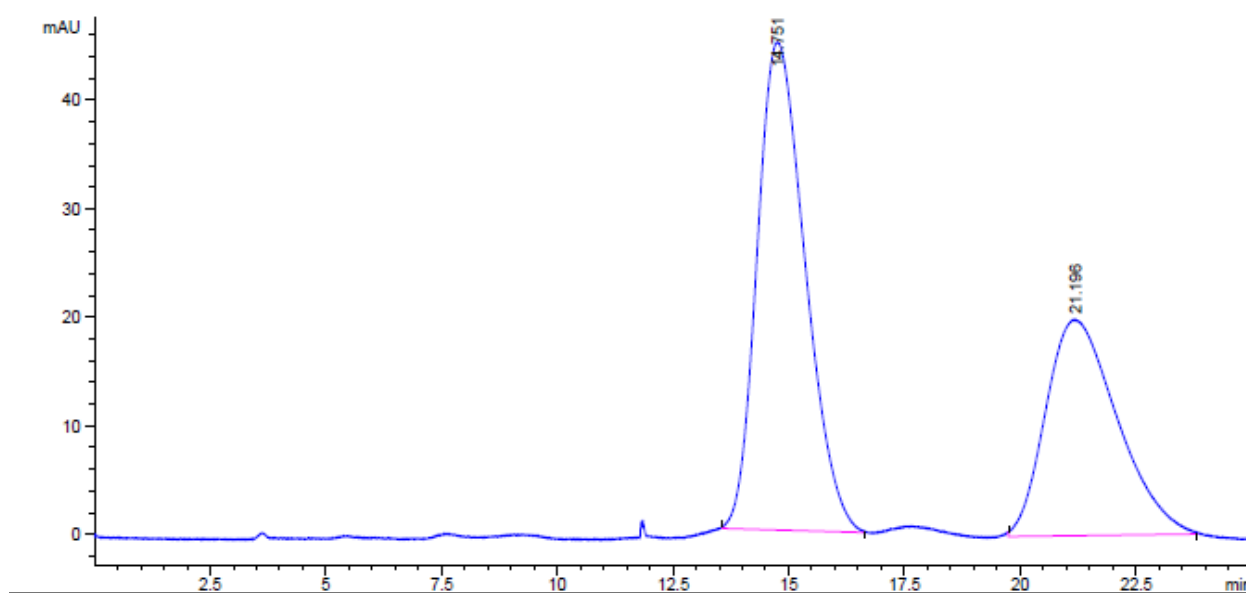

**Figure S135.** Chiral HPLC separation of (2*S*,1'*R*)-**20i** and (2*S*,1'*S*)-**20j** on Chiralcel OD-I column using MTBE/heptane (2:98) and 0.1% diethylamine as eluents.

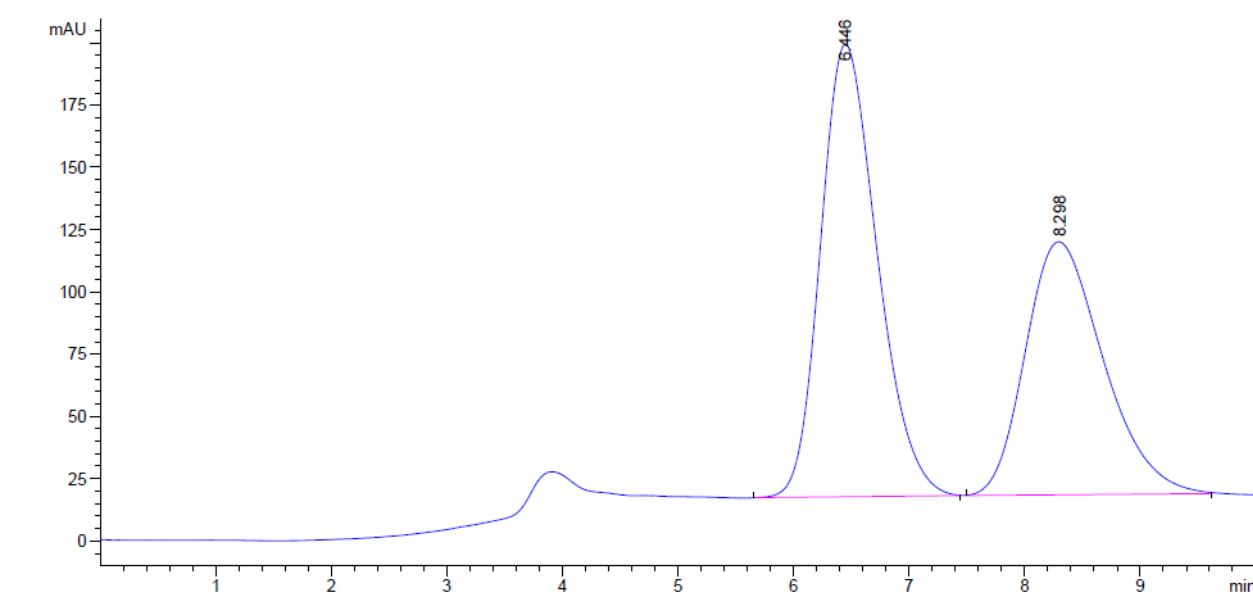

**Figure S136.** Chiral HPLC separation of (2*S*,1'*R*)-**20m** and (2*S*,1'*S*)-**20n** on Chiralcel OD column using heptane and 0.1% diethylamine as eluents.

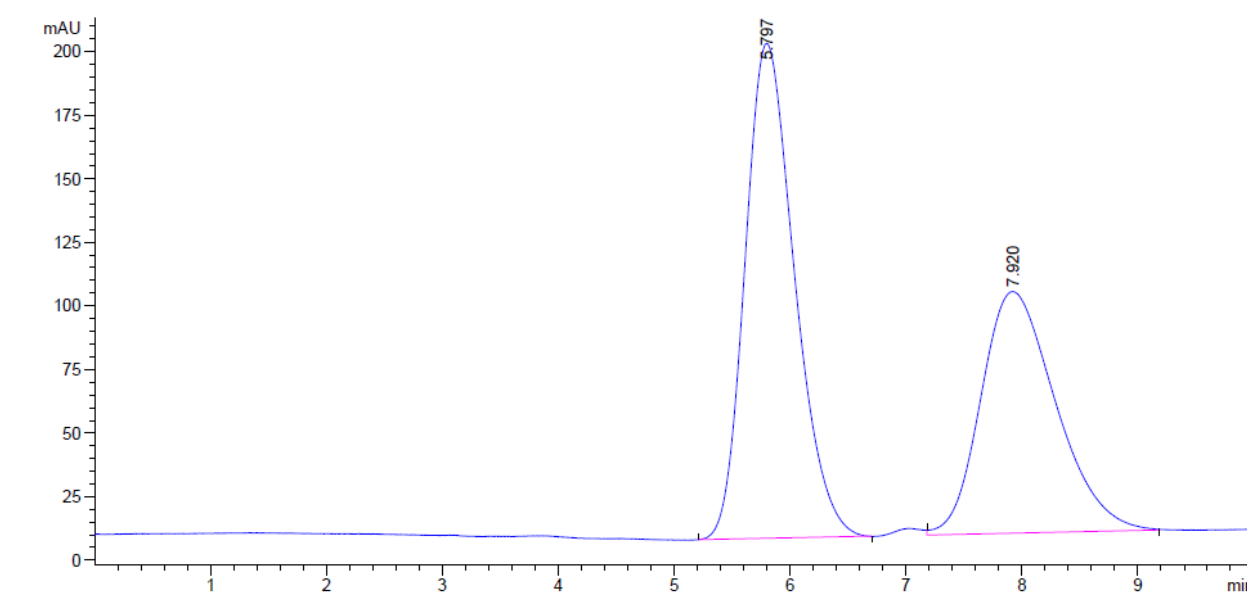

**Figure S137.** Chiral HPLC separation of (2*S*,1'*R*)-**20o** and (2*S*,1'*S*)-**20p** on Chiralcel OD column using heptane and 0.1% diethylamine as eluents.

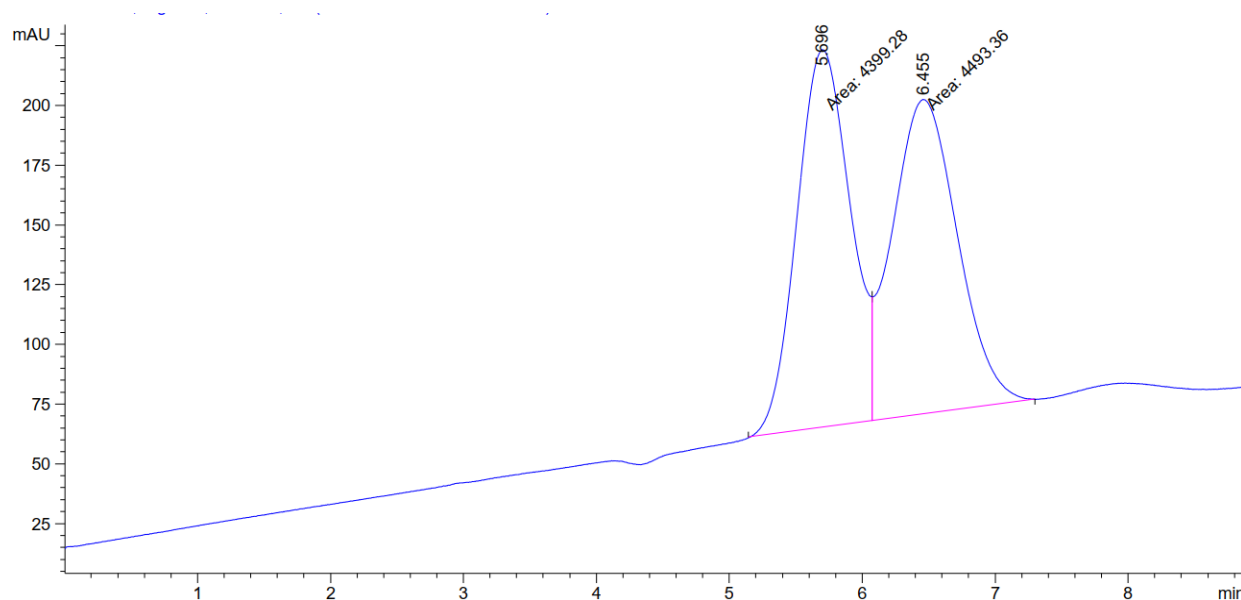

**Figure S138.** Chiral HPLC separation of (2*S*,1'*R*)-**20w** and (2*S*,1'*S*)-**20x** on Chiralcel OD column using heptane and 0.1% diethylamine as eluents.

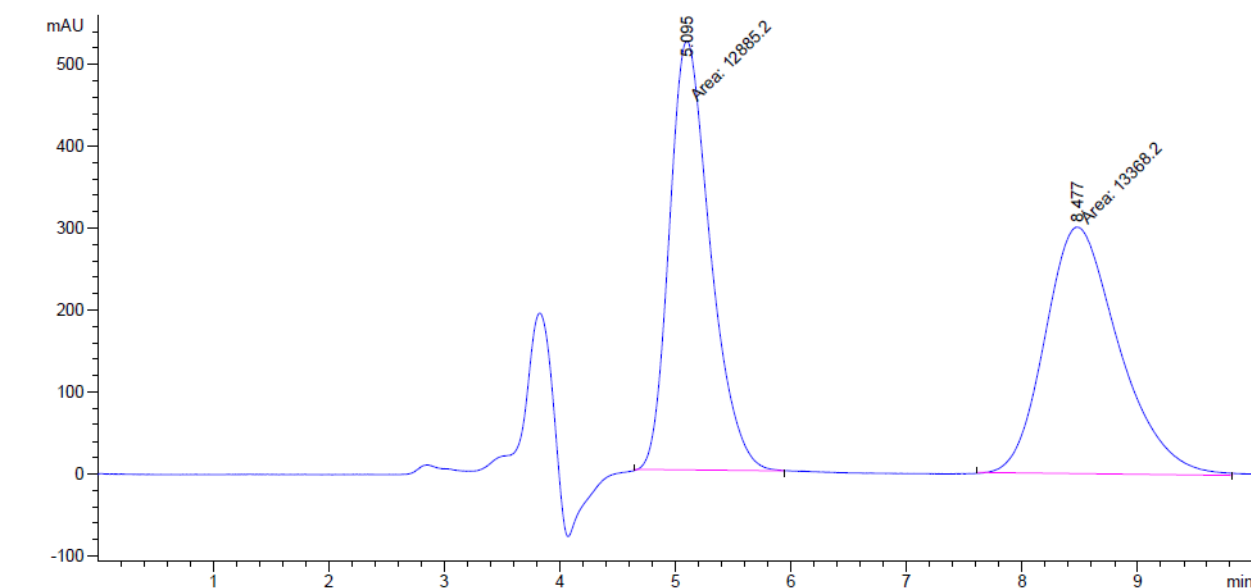

**Figure S139.** Chiral HPLC separation of (*S*)-**24a** and (*R*)-**24b** on Chiralcel OD-H column using 1-PrOH/heptanes (15:85) and 0.1% diethylamine as eluents.

#### 4. VCD analysis

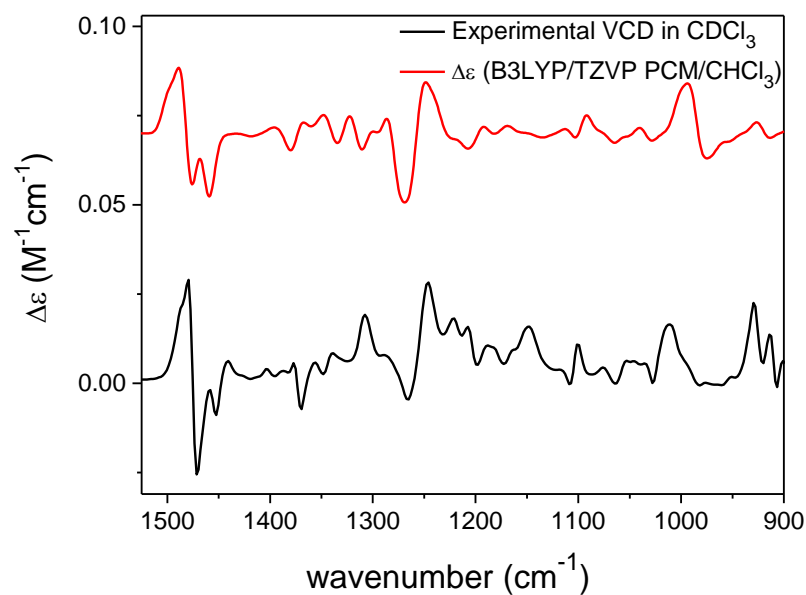

**Figure S140.** Experimental VCD spectrum of (5S,1'S)-**1a** in  $\text{CDCl}_3$  compared with the B3LYP/TZVP PCM/ $\text{CHCl}_3$  // B3LYP/TZVP PCM/ $\text{CHCl}_3$  VCD spectrum of (5S,1'S)-**1a**.

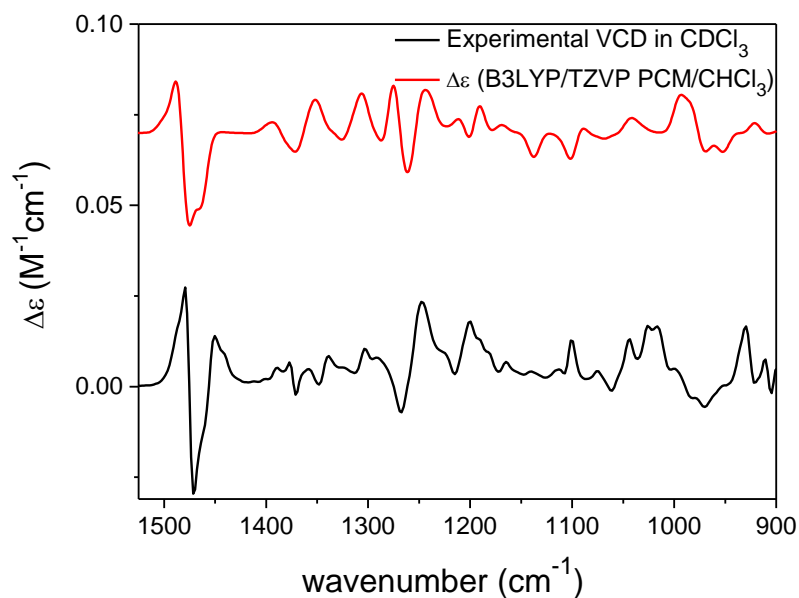

**Figure S141.** Experimental VCD spectrum of (5S,1'R)-**1b** in  $\text{CDCl}_3$  compared with the B3LYP/TZVP PCM/ $\text{CHCl}_3$  // B3LYP/TZVP PCM/ $\text{CHCl}_3$  VCD spectrum of (5S,1'R)-**1b**.



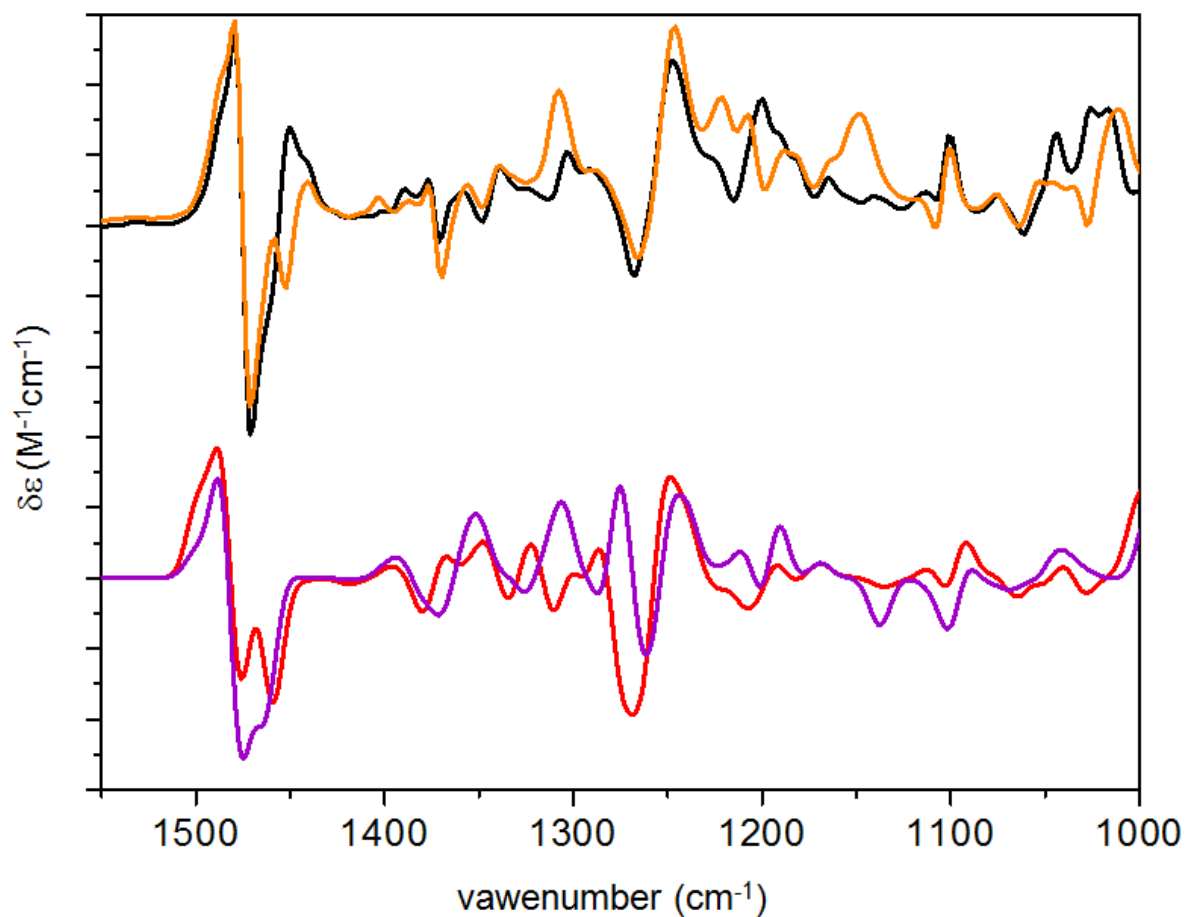

**Figure S142.** Experimental VCD spectra of (5*S*,1'*S*)-**1a** (black) and (5*S*,1'*R*)-**1b** (orange) in CDCl<sub>3</sub> compared with the B3LYP/TZVP PCM/CHCl<sub>3</sub> // B3LYP/TZVP PCM/CHCl<sub>3</sub> VCD spectra of (5*S*,1'*S*)-**1a** (red) and (5*S*,1'*R*)-**1b** (purple).

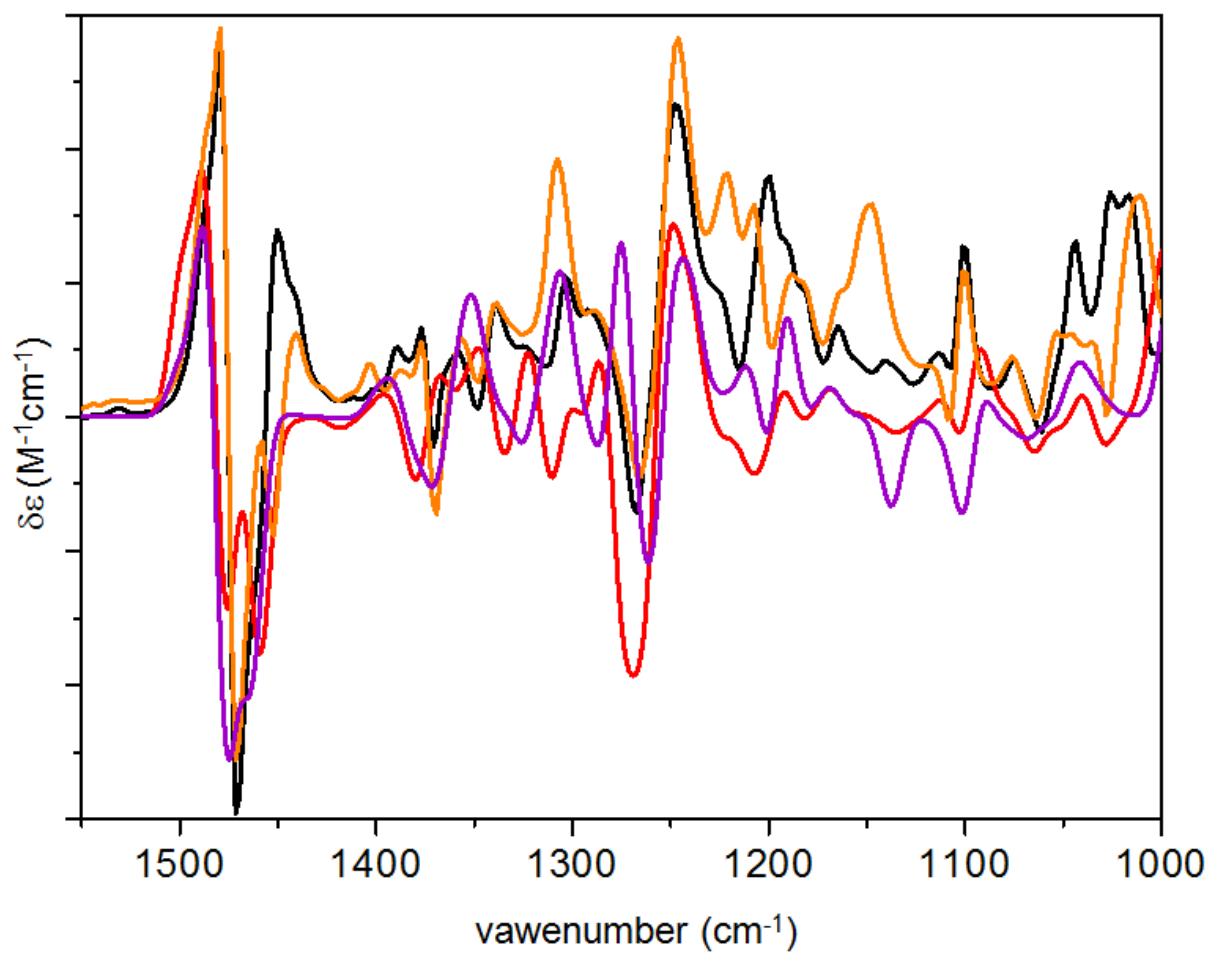

**Figure S143.** Experimental VCD spectra of (5*S*,1'*S*)-**1a** (black) and (5*S*,1'*R*)-**1b** (orange) in CDCl<sub>3</sub> compared with the B3LYP/TZVP PCM/CHCl<sub>3</sub> // B3LYP/TZVP PCM/CHCl<sub>3</sub> VCD spectra of (5*S*,1'*S*)-**1a** (red) and (5*S*,1'*R*)-**1b** (purple).

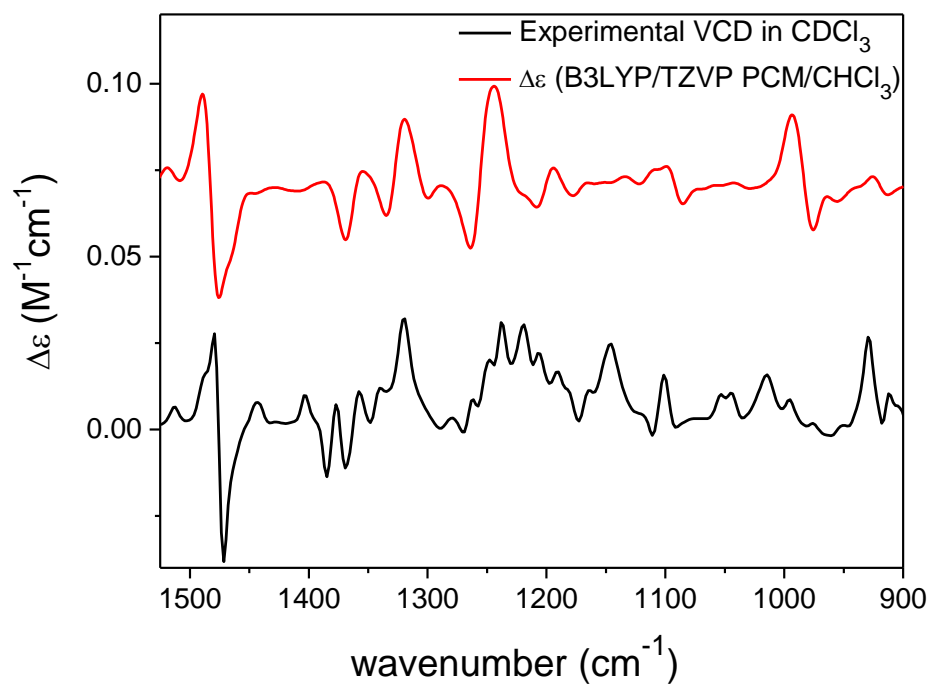

**Figure S144.** Experimental VCD spectrum of (5*S*,1'*S*)-**2a** in CDCl<sub>3</sub> compared with the B3LYP/TZVP PCM/CHCl<sub>3</sub> // B3LYP/TZVP PCM/CHCl<sub>3</sub> VCD spectrum of (5*S*,1'*S*)-**2a**.

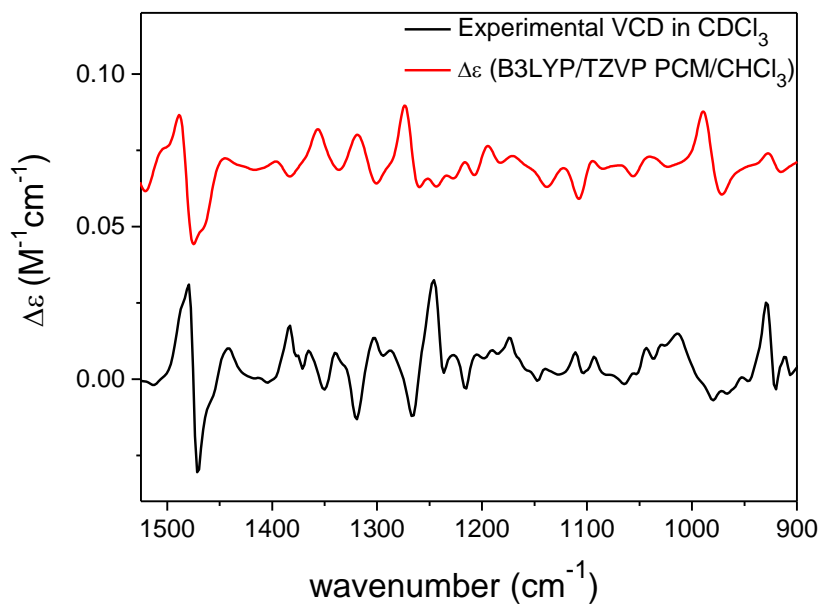

**Figure S145.** Experimental VCD spectrum of (5*S*,1'*R*)-**2b** in CDCl<sub>3</sub> compared with the B3LYP/TZVP PCM/CHCl<sub>3</sub> // B3LYP/TZVP PCM/CHCl<sub>3</sub> VCD spectrum of (5*S*,1'*R*)-**2b**.

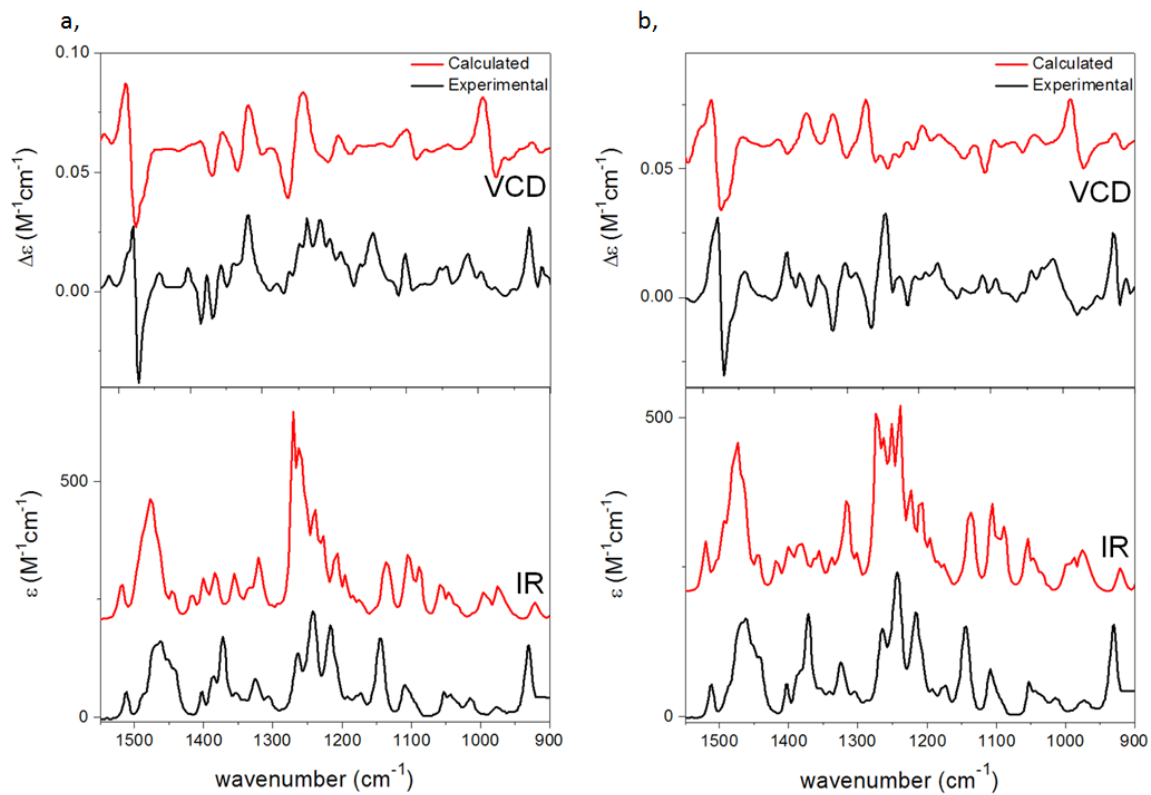

**Figure S146.** Experimental VCD (upper black,  $\text{CDCl}_3$ ) and IR spectra (lower black,  $\text{CDCl}_3$ ) of a) (5*S*,1'*S*)-**2a** and b) (5*S*,1'*R*)-**2b** compared with the B3LYP/TZPV VCD (upper red) and IR (lower red) spectra.

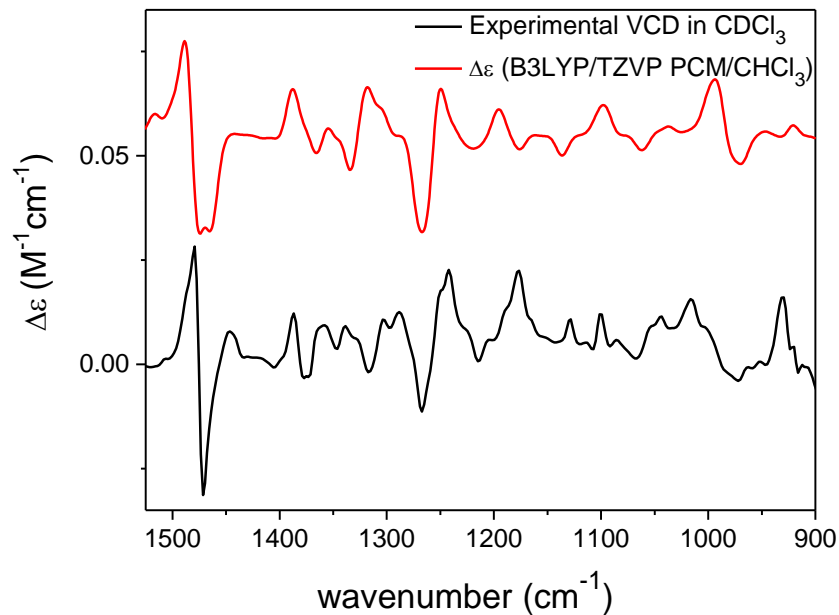

**Figure S147.** Experimental VCD spectrum of (5*S*,1'*S*)-**3a** in CDCl<sub>3</sub> compared with the B3LYP/TZVP PCM/CHCl<sub>3</sub> // B3LYP/TZVP PCM/CHCl<sub>3</sub> VCD spectrum of (5*S*,1'*S*)-**3a**.

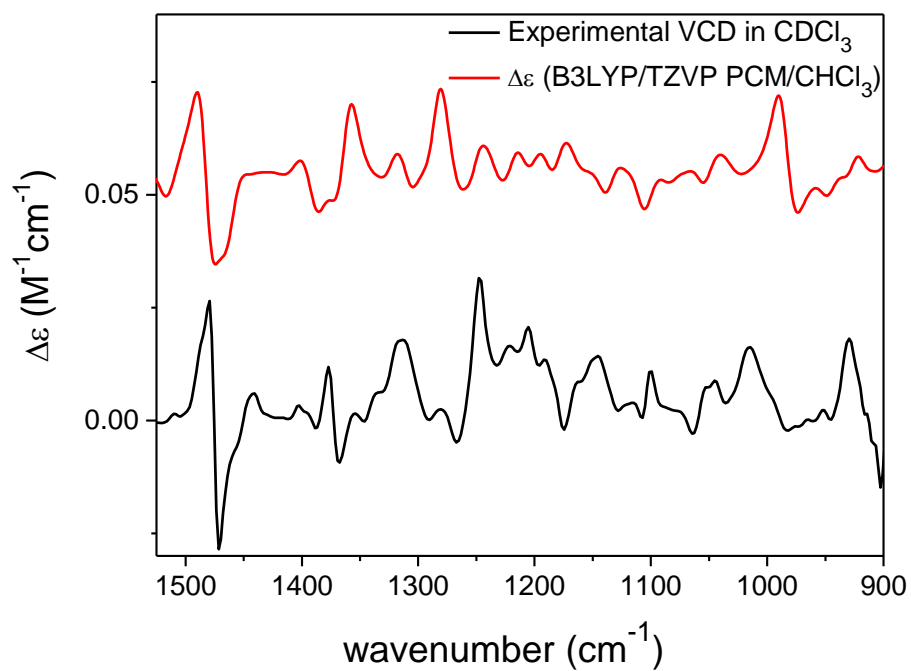

**Figure S148.** Experimental VCD spectrum of (5*S*,1'*R*)-**3b** in CDCl<sub>3</sub> compared with the B3LYP/TZVP PCM/CHCl<sub>3</sub> // B3LYP/TZVP PCM/CHCl<sub>3</sub> VCD spectrum of (5*S*,1'*R*)-**3b**.

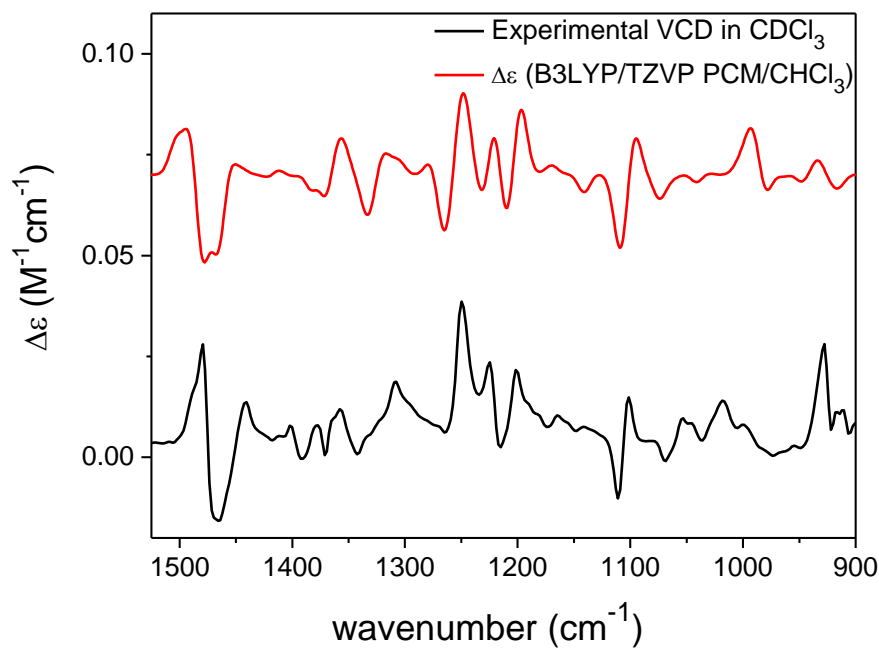

**Figure S149.** Experimental VCD spectrum of (5*S*,1'*S*)-**4a** in CDCl<sub>3</sub> compared with the B3LYP/TZVP PCM/CHCl<sub>3</sub> // B3LYP/TZVP PCM/CHCl<sub>3</sub> VCD spectrum of (5*S*,1'*S*)-**4a**.

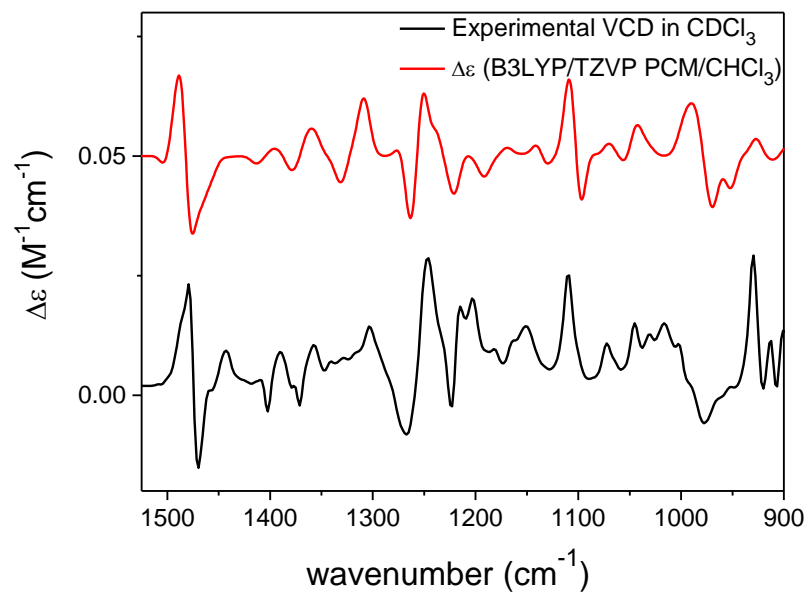

**Figure S150.** Experimental VCD spectrum of (5*S*,1'*R*)-**4b** in CDCl<sub>3</sub> compared with the B3LYP/TZVP PCM/CHCl<sub>3</sub> // B3LYP/TZVP PCM/CHCl<sub>3</sub> VCD spectrum of (5*S*,1'*R*)-**4b**.

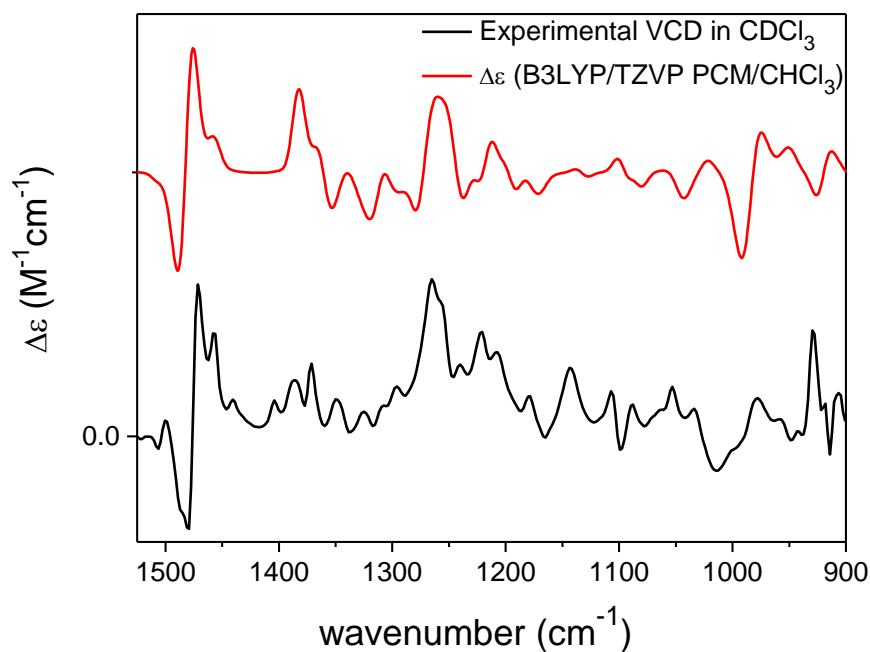

**Figure S151.** Experimental VCD spectrum of (5*R*,1'*R*)-**5a** in CDCl<sub>3</sub> compared with the B3LYP/TZVP PCM/CHCl<sub>3</sub> // B3LYP/TZVP PCM/CHCl<sub>3</sub> VCD spectrum of (5*R*,1'*R*)-**5a**.

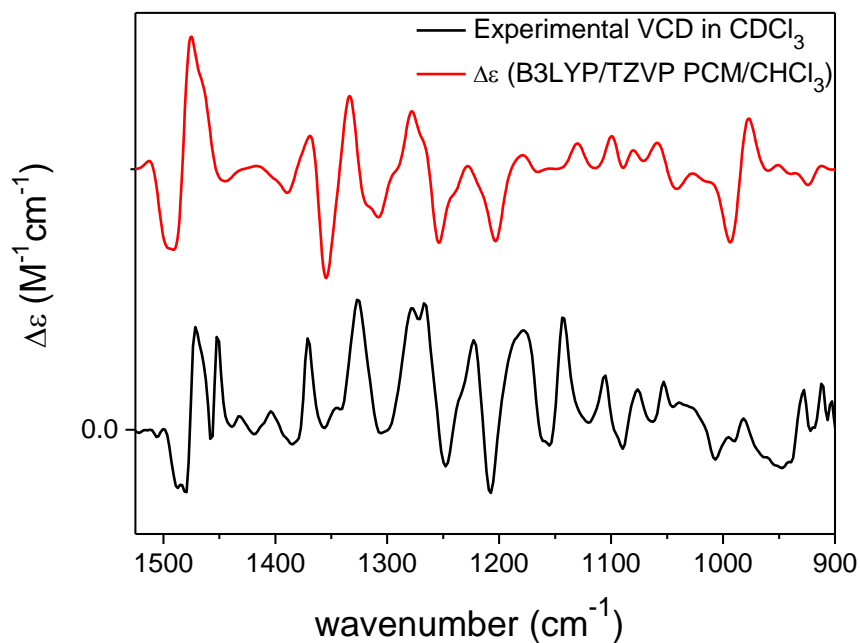

**Figure S152.** Experimental VCD spectrum of (5*R*,1'*S*)-**5b** in CDCl<sub>3</sub> compared with the B3LYP/TZVP PCM/CHCl<sub>3</sub> // B3LYP/TZVP PCM/CHCl<sub>3</sub> VCD spectrum of (5*R*,1'*S*)-**5b**.

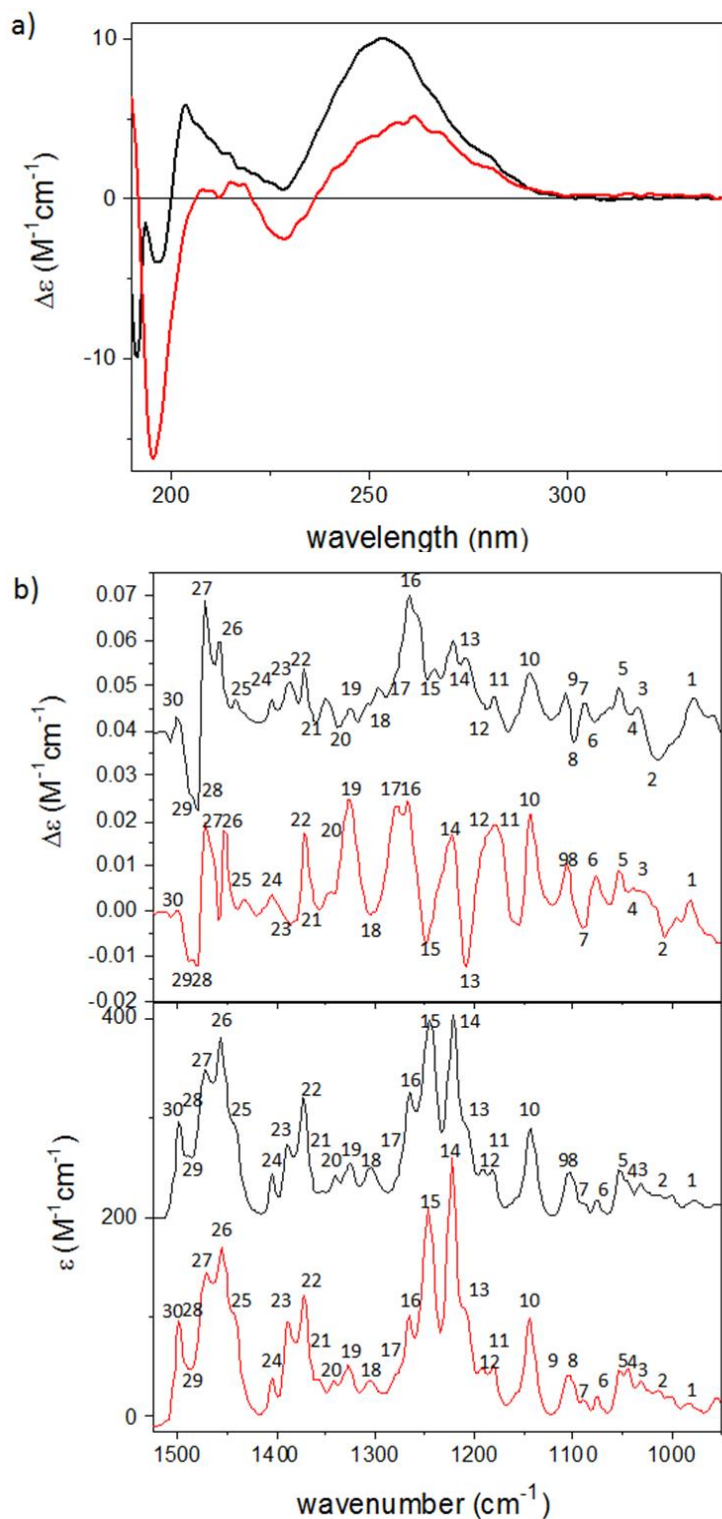

**Figure S153.** a) Overlapped experimental ECD spectra of (5*R*,1'*R*)-**5a** (black) and (5*R*,1'*S*)-**5b** (red) in MeCN. b) Experimental VCD spectra of (5*R*,1'*R*)-**5a** (black) and (5*R*,1'*S*)-**5b** (red) in  $\text{CDCl}_3$ .



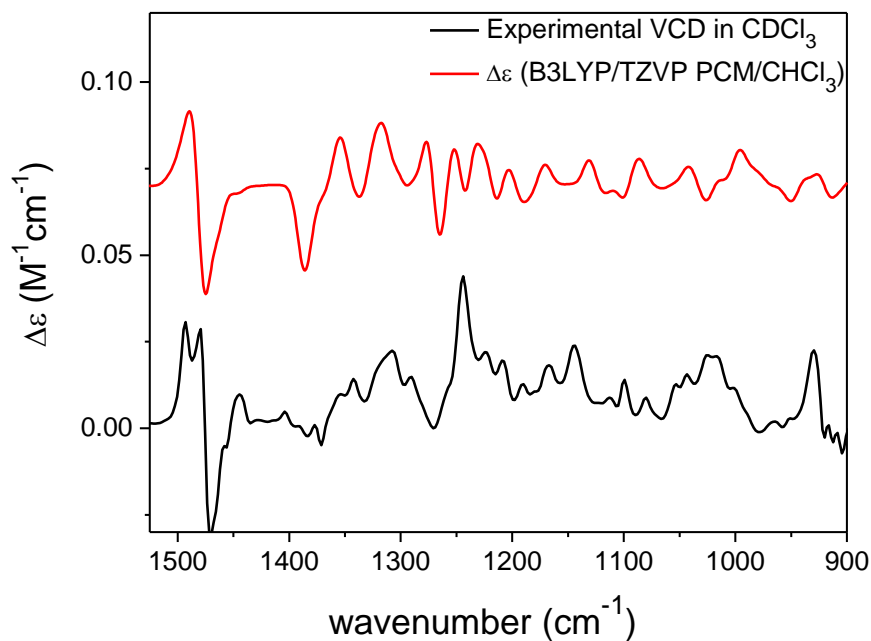

**Figure S154.** Experimental VCD spectrum of (5S,1'S)-**8a** in  $\text{CDCl}_3$  compared with the B3LYP/TZVP PCM/ $\text{CHCl}_3$  // B3LYP/TZVP PCM/ $\text{CHCl}_3$  VCD spectrum of (5S,1'S)-**8a**.

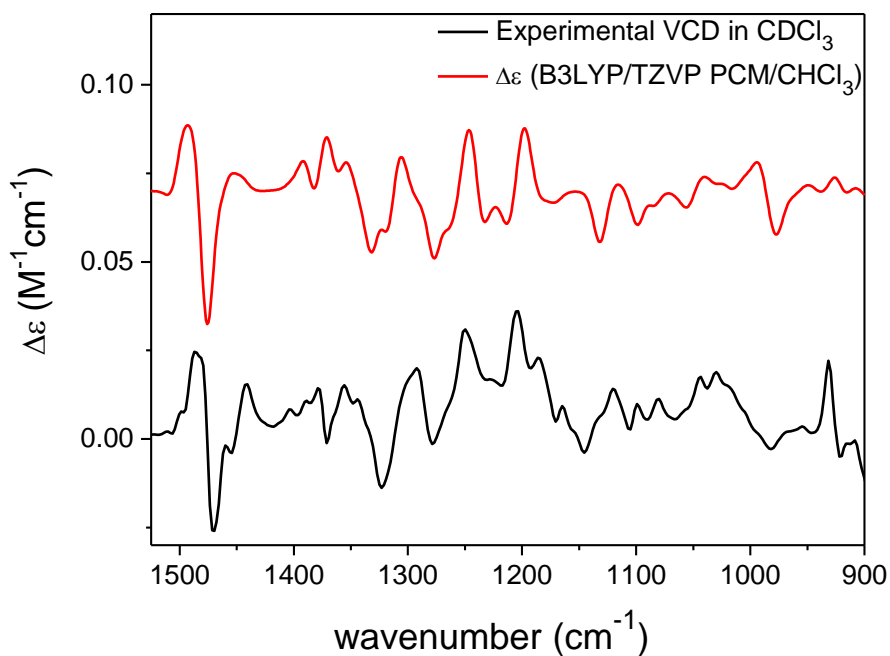

**Figure S155.** Experimental VCD spectrum of (5S,1'R)-**8b** in  $\text{CDCl}_3$  compared with the B3LYP/TZVP PCM/ $\text{CHCl}_3$  // B3LYP/TZVP PCM/ $\text{CHCl}_3$  VCD spectrum of (5S,1'R)-**8b**.

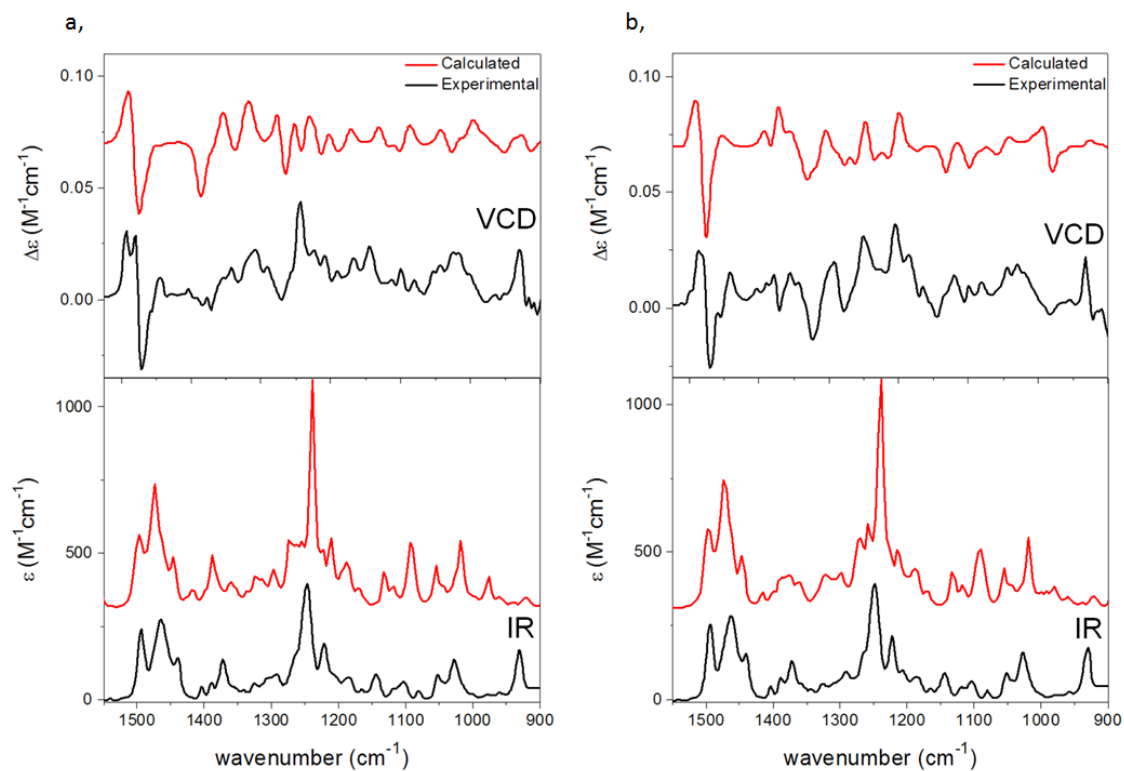

**Figure S156.** Experimental VCD (upper black,  $\text{CDCl}_3$ ) and IR spectra (lower black,  $\text{CDCl}_3$ ) of a) ( $5S,1'S$ )-**8a** and b) ( $5S,1'R$ )-**8b** compared with the B3LYP/TZPV VCD (upper red) and IR (lower red) spectra.

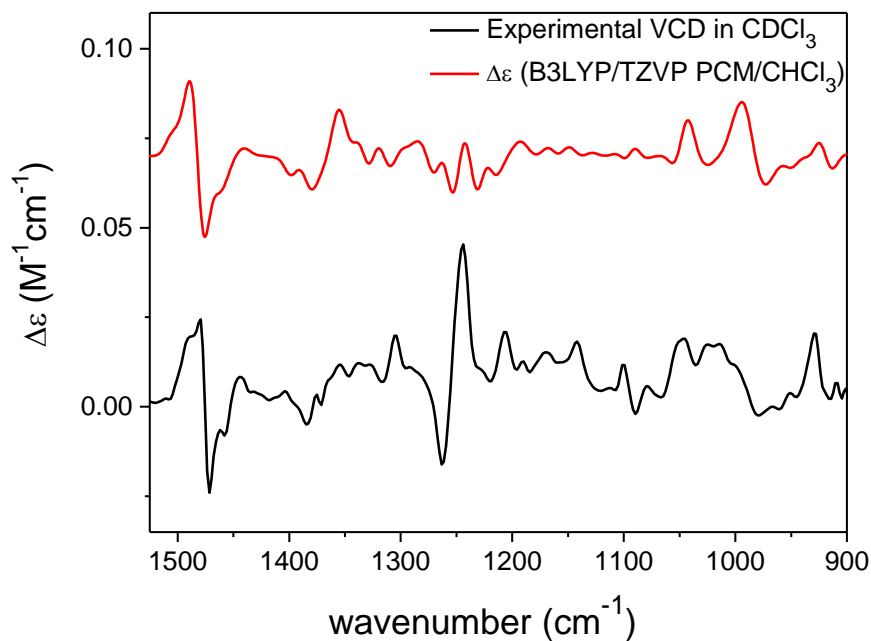

**Figure S157.** Experimental VCD spectrum of (5S,1'S)-**9a** in  $\text{CDCl}_3$  compared with the B3LYP/TZVP PCM/ $\text{CHCl}_3$  // B3LYP/TZVP PCM/ $\text{CHCl}_3$  VCD spectrum of (5S,1'S)-**9a**.

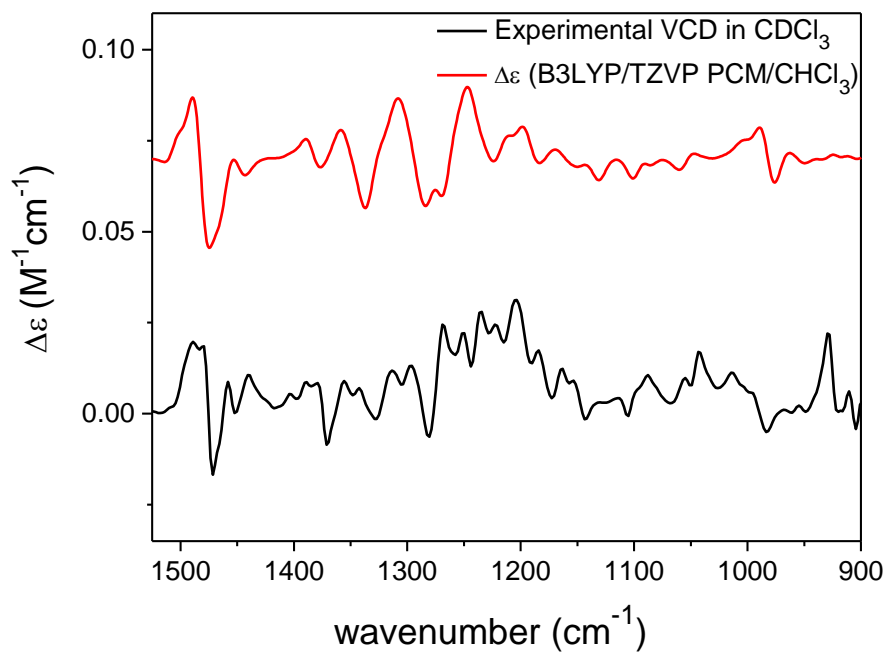

**Figure S158.** Experimental VCD spectrum of (5S,1'R)-**9b** in  $\text{CDCl}_3$  compared with the B3LYP/TZVP PCM/ $\text{CHCl}_3$  // B3LYP/TZVP PCM/ $\text{CHCl}_3$  VCD spectrum of (5S,1'R)-**9b**.

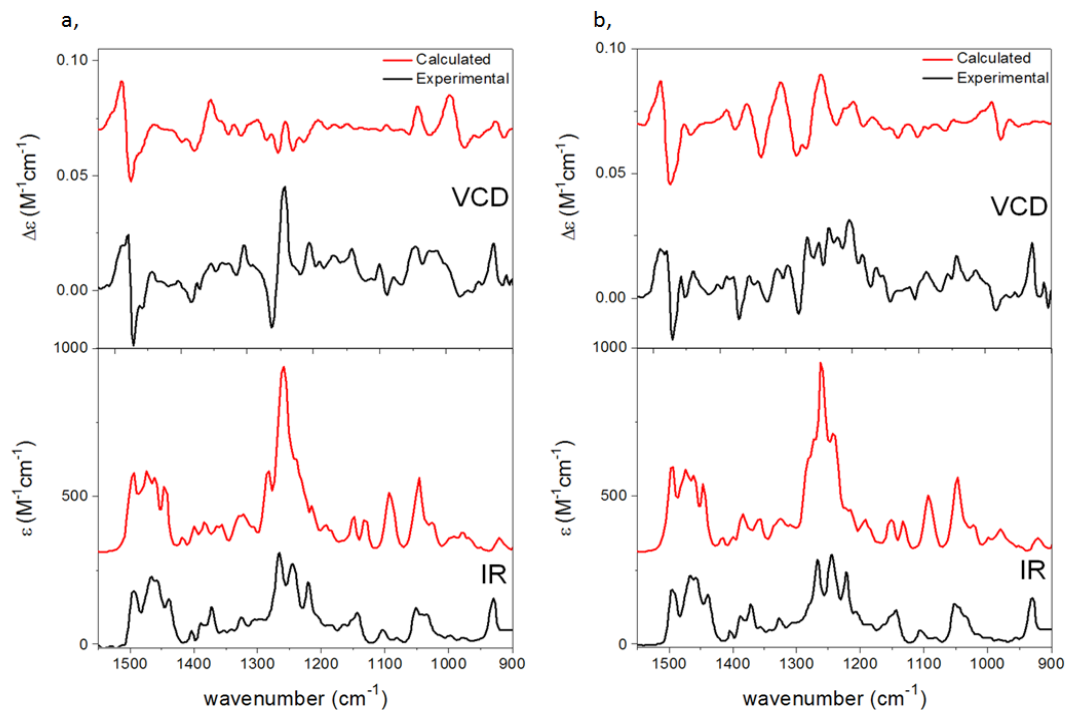

**Figure S159.** Experimental VCD (upper black,  $\text{CDCl}_3$ ) and IR spectra (lower black,  $\text{CDCl}_3$ ) of a) (5*S*,1'*S*)-**9a** and b) (5*S*,1'*R*)-**9b** compared with the B3LYP/TZPV VCD (upper red) and IR (lower red) spectra.

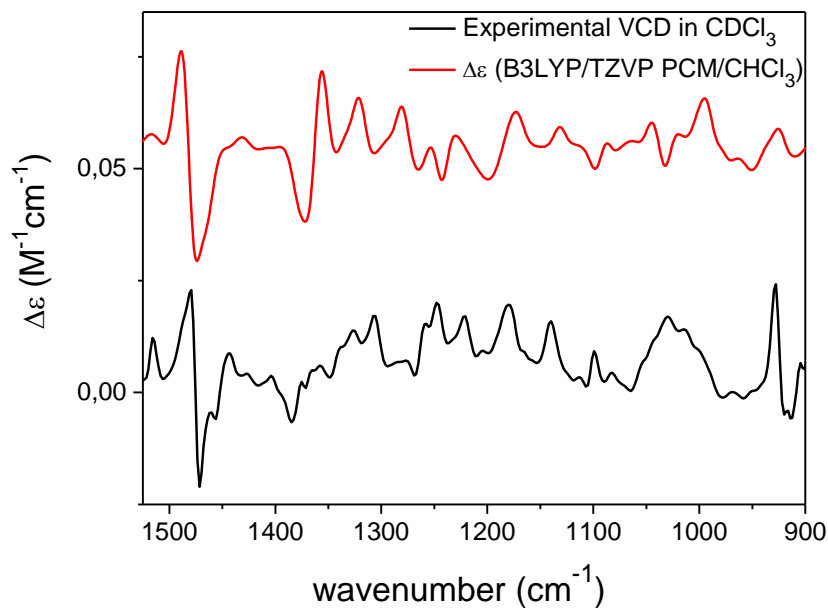

**Figure S160.** Experimental VCD spectrum of (5*S*,1'*S*)-**10a** in  $\text{CDCl}_3$  compared with the B3LYP/TZVP PCM/ $\text{CHCl}_3$  // B3LYP/TZVP PCM/ $\text{CHCl}_3$  VCD spectrum of (5*S*,1'*S*)-**10a**.

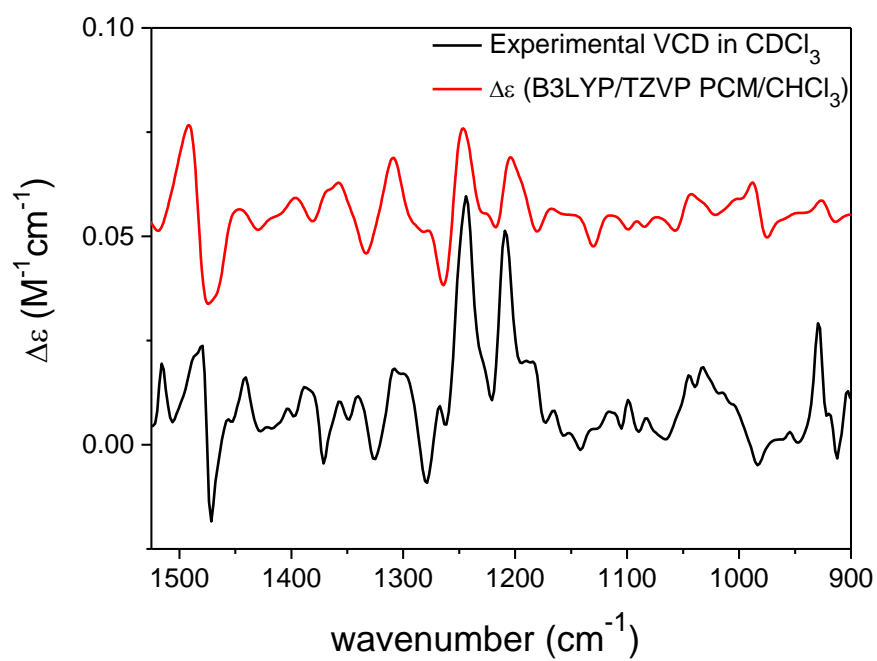

**Figure S161.** Experimental VCD spectrum of (5*S*,1'*R*)-**10b** in  $\text{CDCl}_3$  compared with the B3LYP/TZVP PCM/ $\text{CHCl}_3$  // B3LYP/TZVP PCM/ $\text{CHCl}_3$  VCD spectrum of (5*S*,1'*R*)-**10b**.

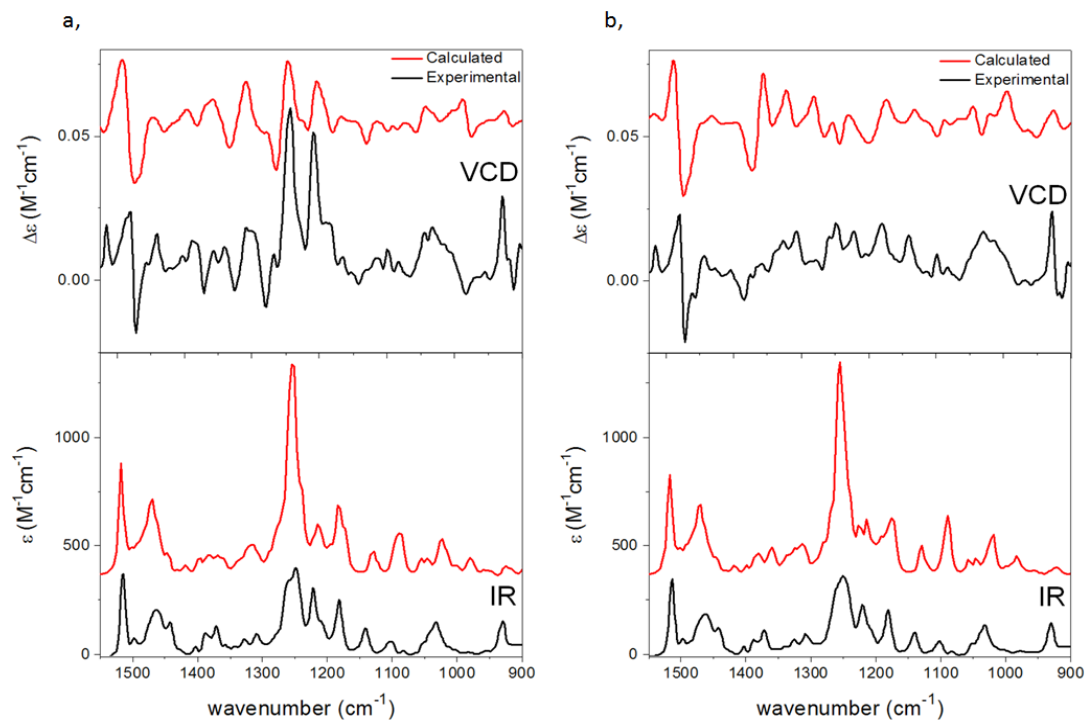

**Figure S162.** Experimental VCD (upper black,  $\text{CDCl}_3$ ) and IR spectra (lower black,  $\text{CDCl}_3$ ) of a) (5*S*,1'*S*)-**10a** and b) (5*S*,1'*R*)-**10b** compared with the B3LYP/TZPV VCD (upper red) and IR (lower red) spectra.

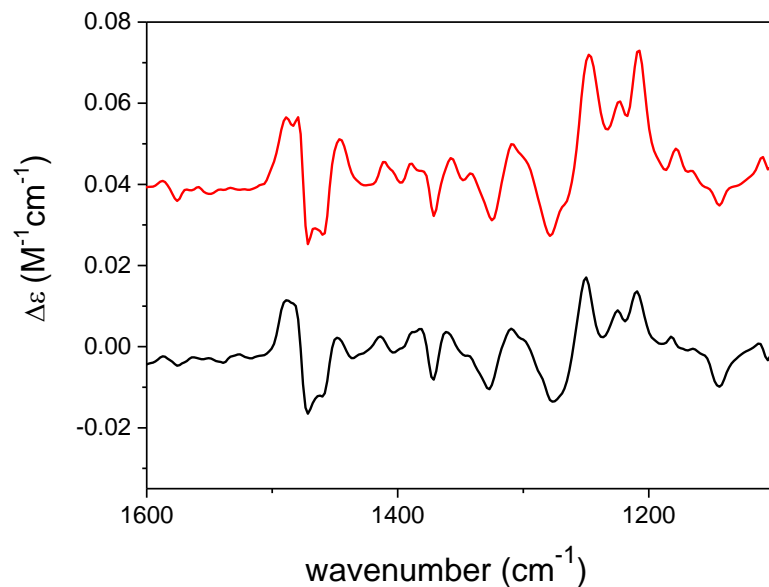

**Figure S163.** Experimental VCD spectra of (5*S*,1'*R*)-**15b** recorded in DMSO- $d_6$  (black) and  $\text{CDCl}_3$  (red).

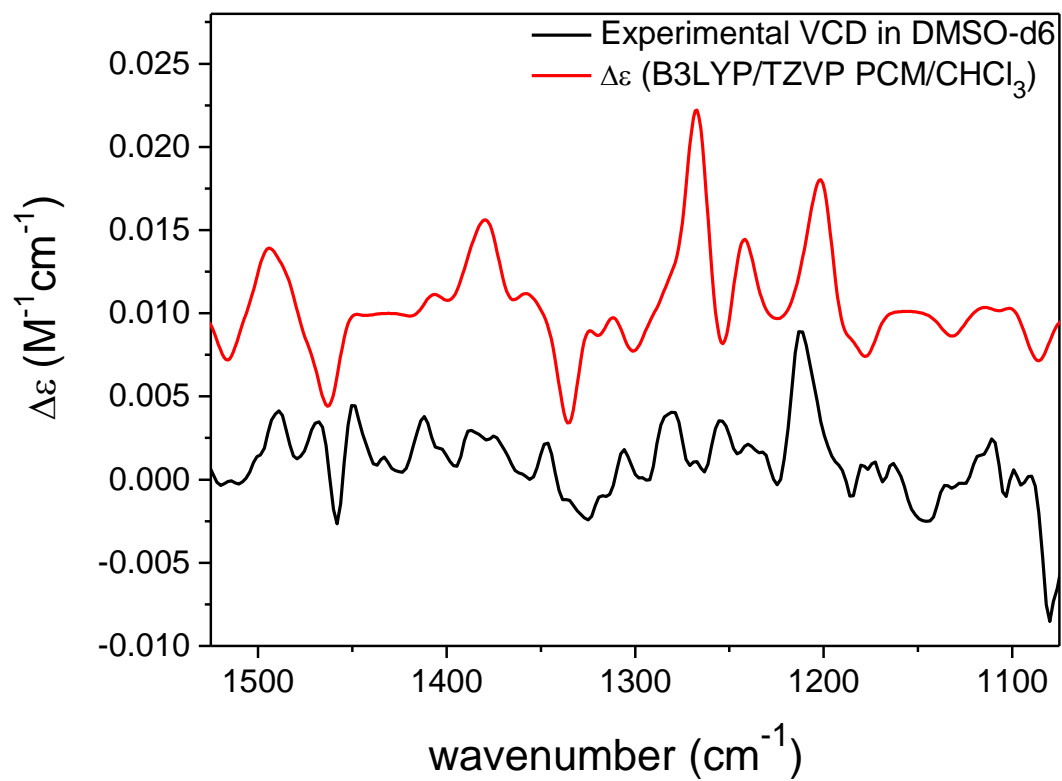

**Figure S164.** Experimental VCD spectrum of (*R*)-**17a** in DMSO-d<sub>6</sub> compared with the B3LYP/TZVP PCM/DMSO // B3LYP/TZVP PCM/CHCl<sub>3</sub> VCD spectrum of (*R*)-**17a**.

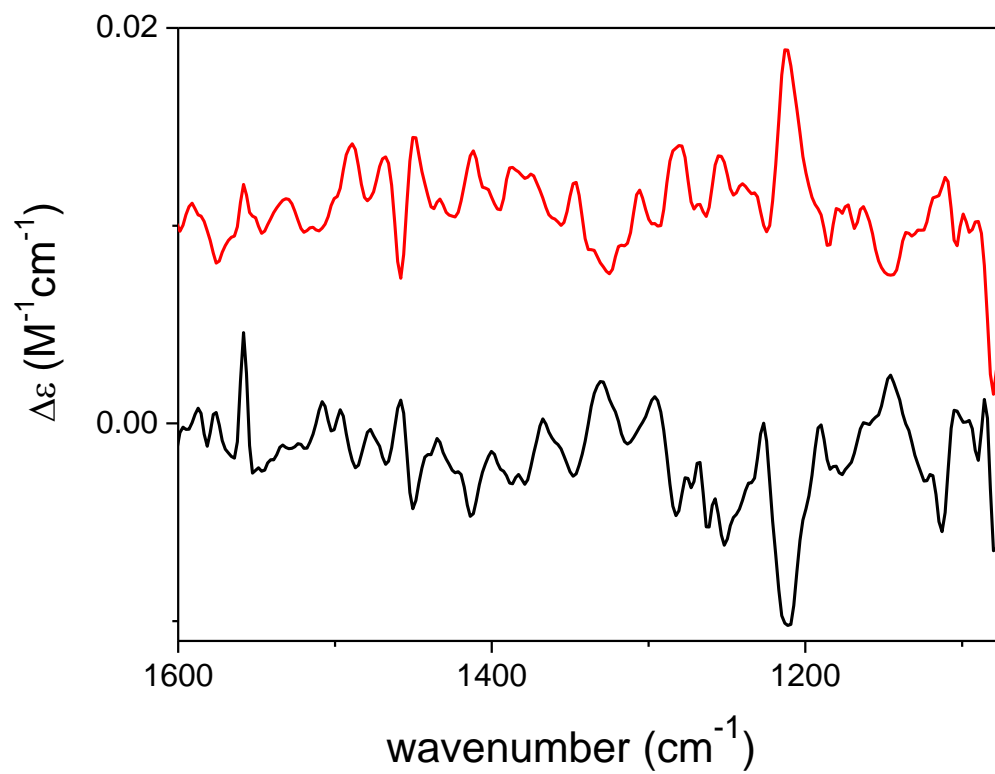

**Figure S165.** Experimental VCD spectra of (*S*)-**17b** (red) and (*R*)-**17a** (black) in DMSO-d<sub>6</sub>.



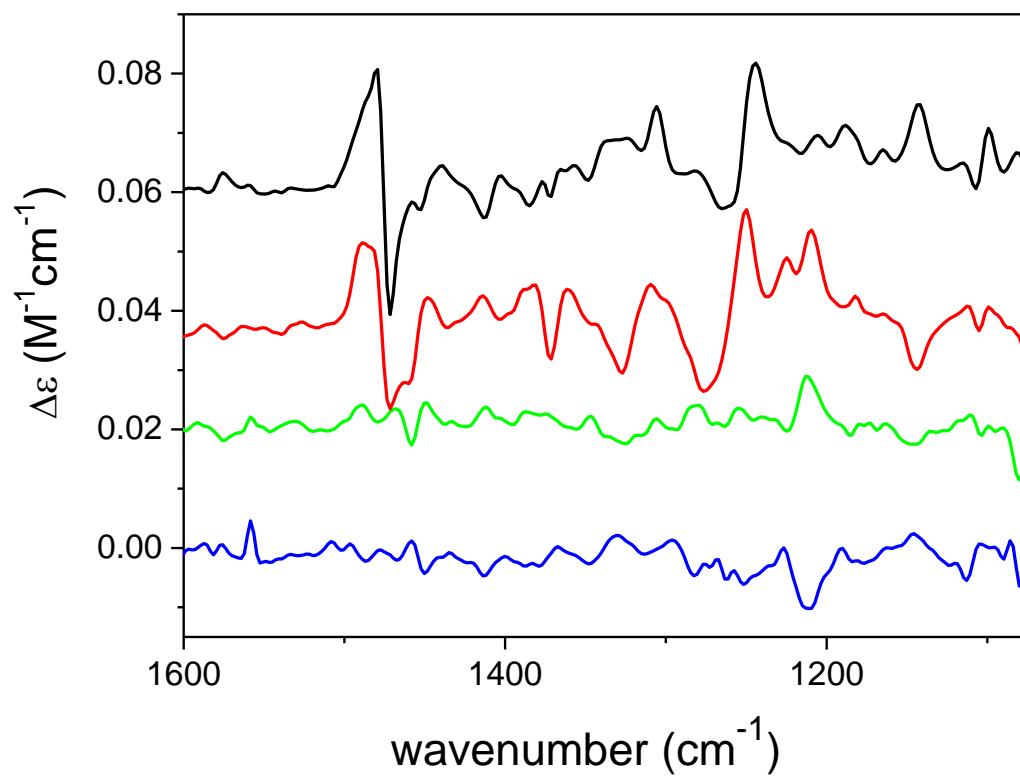

**Figure S166.** Experimental VCD spectra of (*5S*,1'*S*)-**15a** ( $\text{CDCl}_3$ , black), (*5S*,1'*R*)-**15b** (DMSO *d*-6, red), (*S*)-**17b** (DMSO-*d*6, green) and (*R*)-**17b** (DMSO-*d*6, blue).

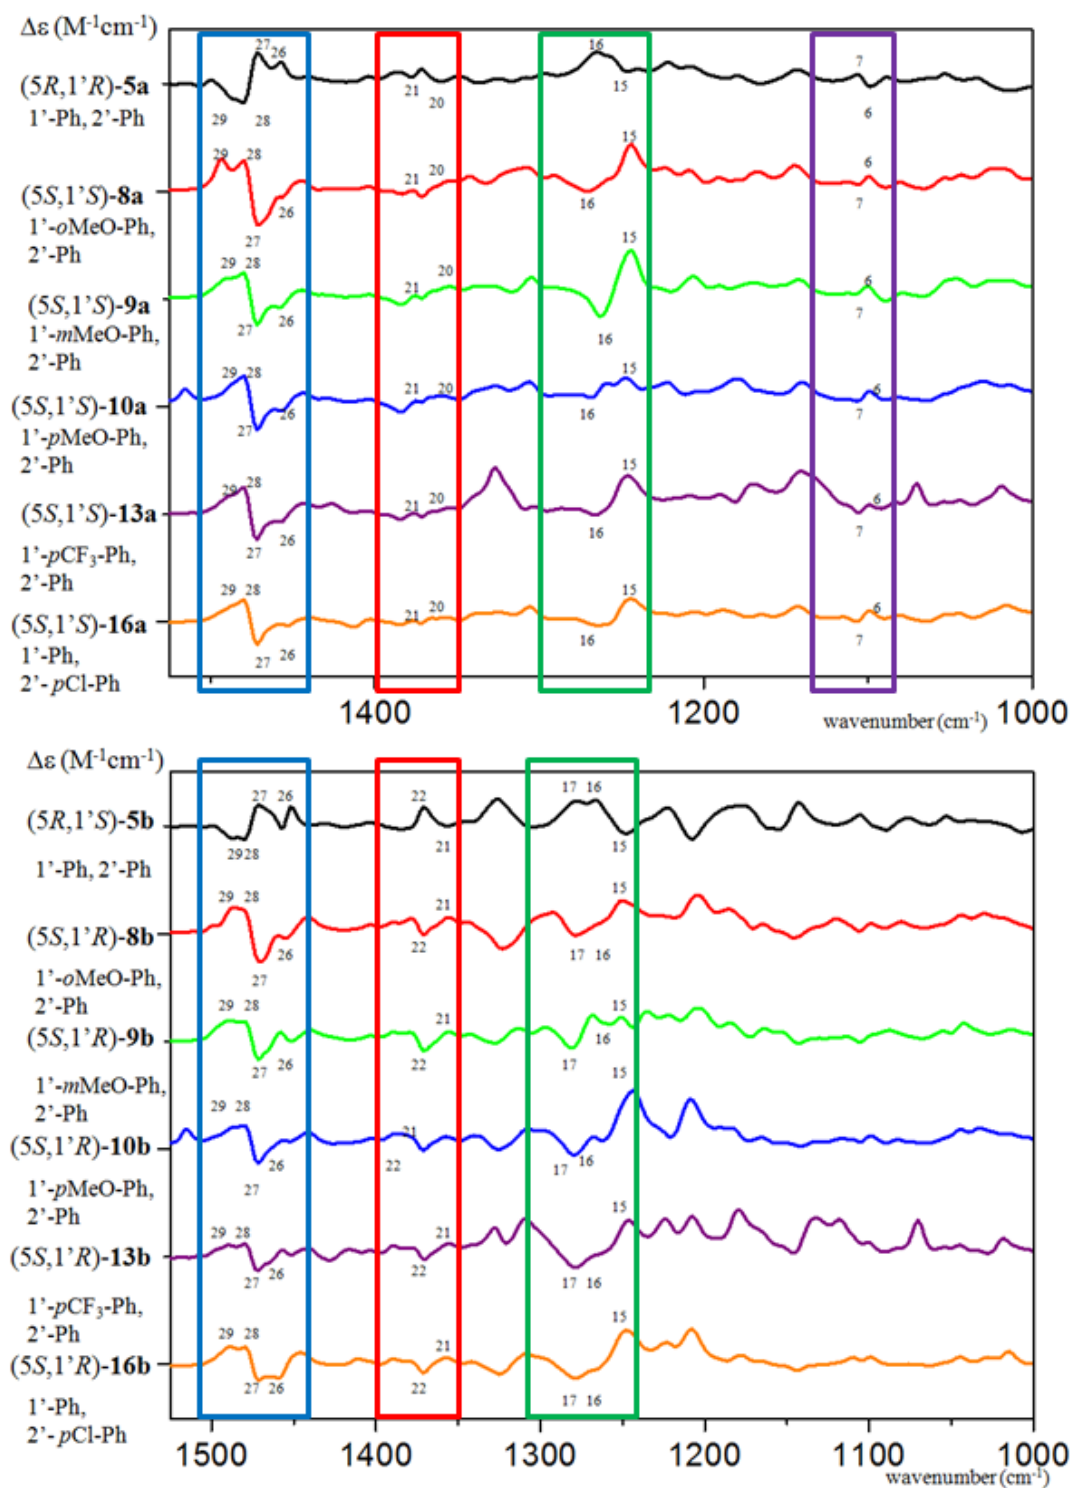

**Figure S167.** a) Experimental VCD spectra of (5R,1'R)-**5a** (black), (5S,1'S)-**8a** (red), (5S,1'S)-**9a** (green), (5S,1'S)-**10a** (blue), (5S,1'S)-**13a** and (5S,1'S)-**16a** (orange). b) Experimental VCD spectra of (5R,1'S)-**5a** (black), (5S,1'R)-**8a** (red), (5S,1'R)-**9a** (green), (5S,1'R)-**10a** (blue), (5S,1'R)-**13a** and (5S,1'R)-**16a** (orange).

## 5. ECD analysis

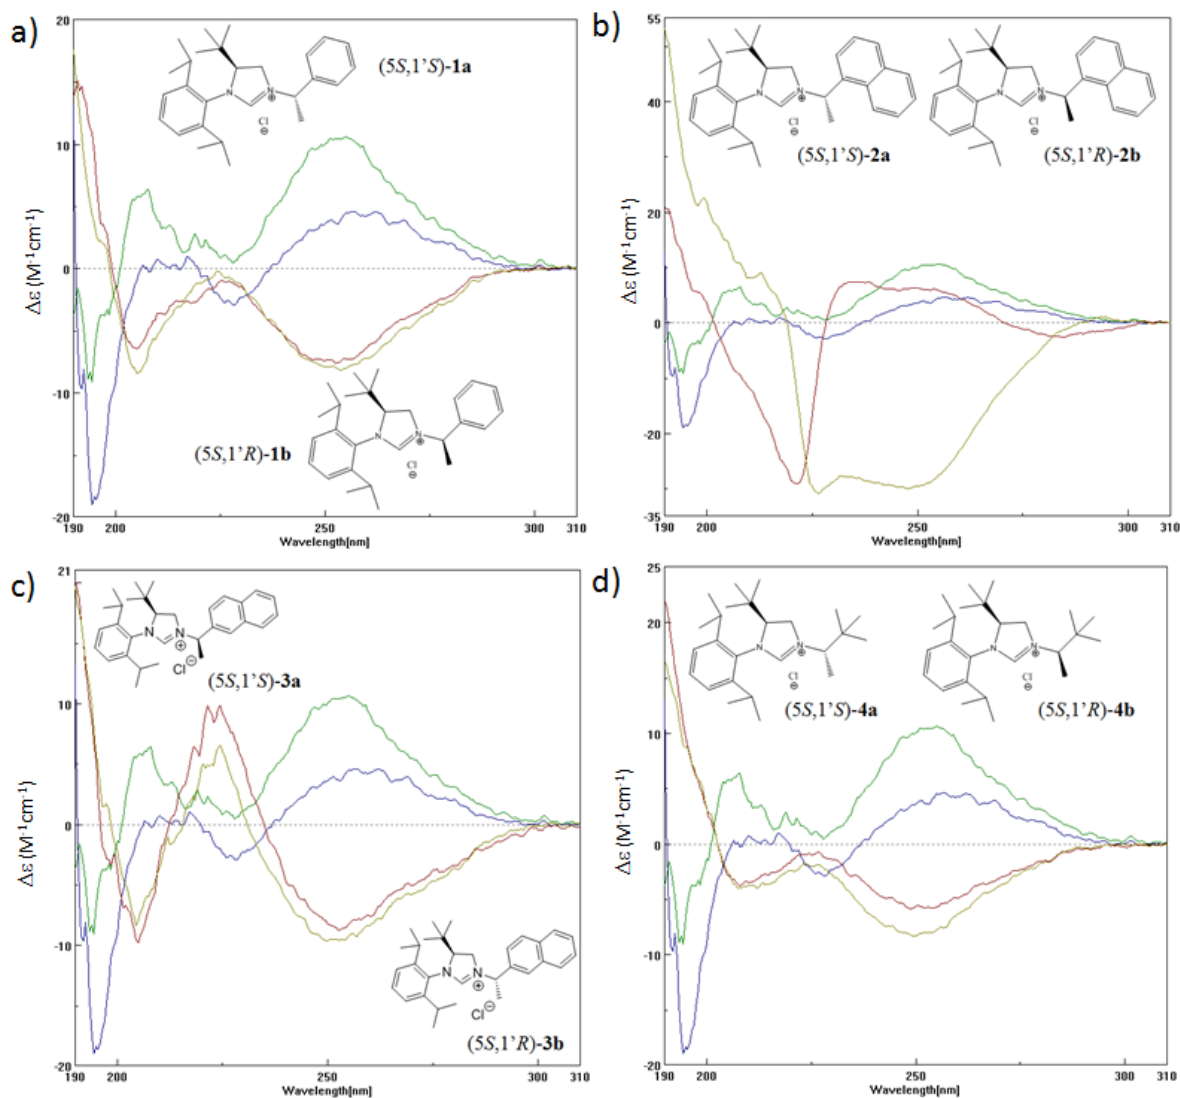

**Figure S168.** a) Experimental ECD spectra of (5*S*,1'*S*)-**1a** (brown) and (5*S*,1'*R*)-**1b** (yellow) compared with the reference ECD spectra of (5*R*,1'*R*)-**5a** (green) and (5*R*,1'*S*)-**5b** (blue). b) Experimental ECD spectra of (5*S*,1'*S*)-**2a** (brown) and (5*S*,1'*R*)-**2b** (yellow) compared with the reference ECD spectra of (5*R*,1'*R*)-**5a** (green) and (5*R*,1'*S*)-**5b** (blue). c) Experimental ECD spectra of (5*S*,1'*S*)-**3a** (brown) and (5*S*,1'*R*)-**3b** (yellow) compared with the reference ECD spectra of (5*R*,1'*R*)-**5a** (green) and (5*R*,1'*S*)-**5b** (blue). d) Experimental ECD spectra of (5*S*,1'*S*)-**4a** (brown) and (5*S*,1'*R*)-**4b** (yellow) compared with the reference ECD spectra of (5*R*,1'*R*)-**5a** (green) and (5*R*,1'*S*)-**5b** (blue).

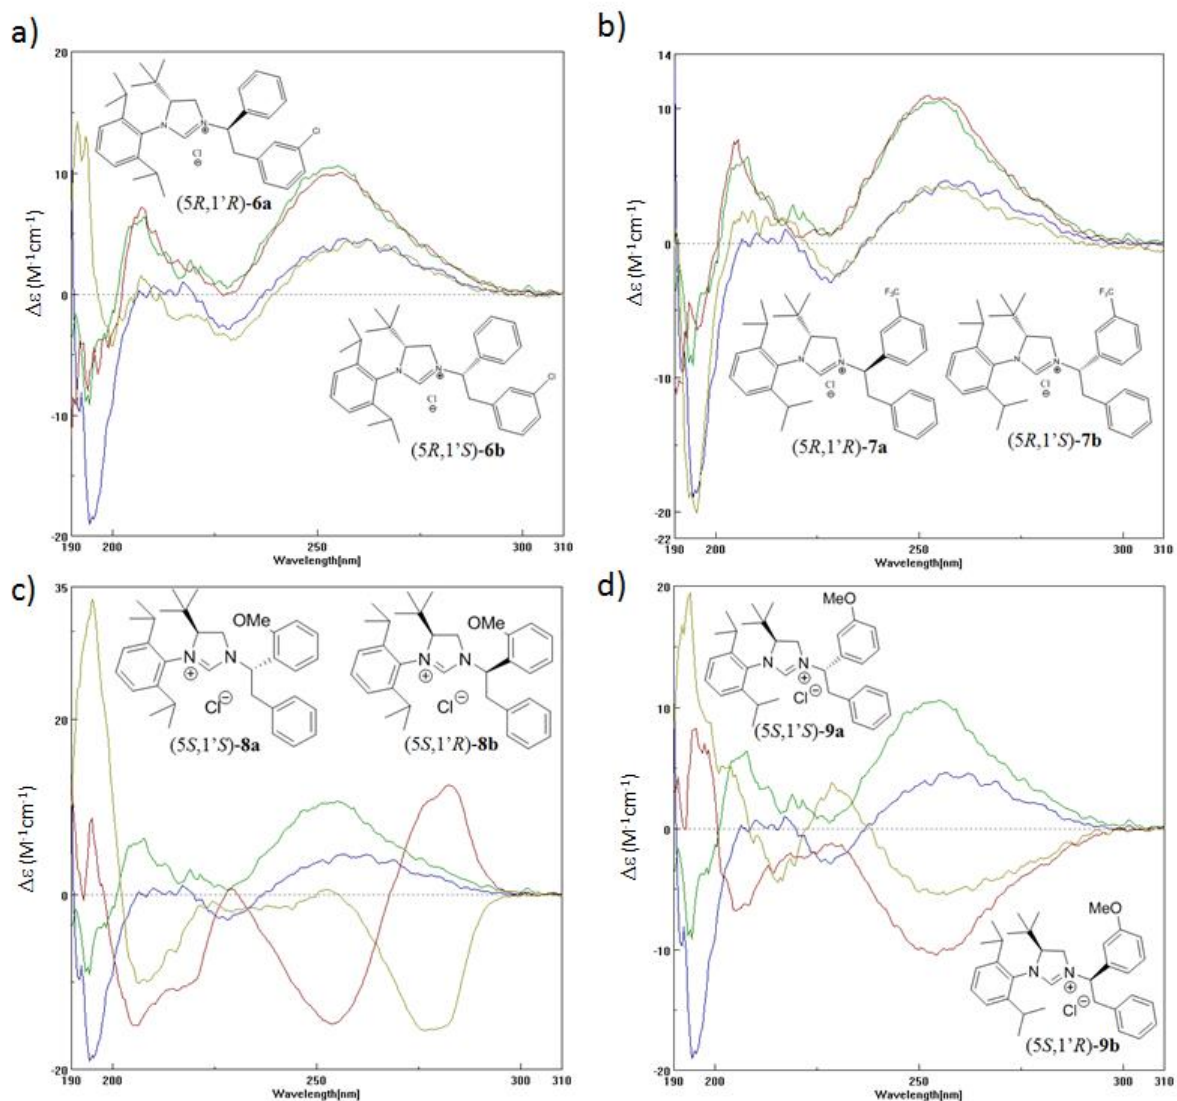

**Figure S169.** a) Experimental ECD spectra of (5R,1'R)-6a (brown) and (5R,1'S)-6b (yellow) compared with the reference ECD spectra of (5R,1'R)-5a (green) and (5R,1'S)-5b (blue). b) Experimental ECD spectra of (5R,1'R)-7a (brown) and (5R,1'S)-7b (yellow) compared with reference the ECD spectra of (5R,1'R)-5a (green) and (5R,1'S)-5b (blue). c) Experimental ECD spectra of (5S,1'S)-8a (brown) and (5S,1'R)-8b (yellow) compared with the reference ECD spectra of (5R,1'R)-5a (green) and (5R,1'S)-5b (blue). d) Experimental ECD spectra of (5S,1'S)-9a (brown) and (5S,1'R)-9b (yellow) compared with the reference ECD spectra of (5R,1'R)-5a (green) and (5R,1'S)-5b (blue).

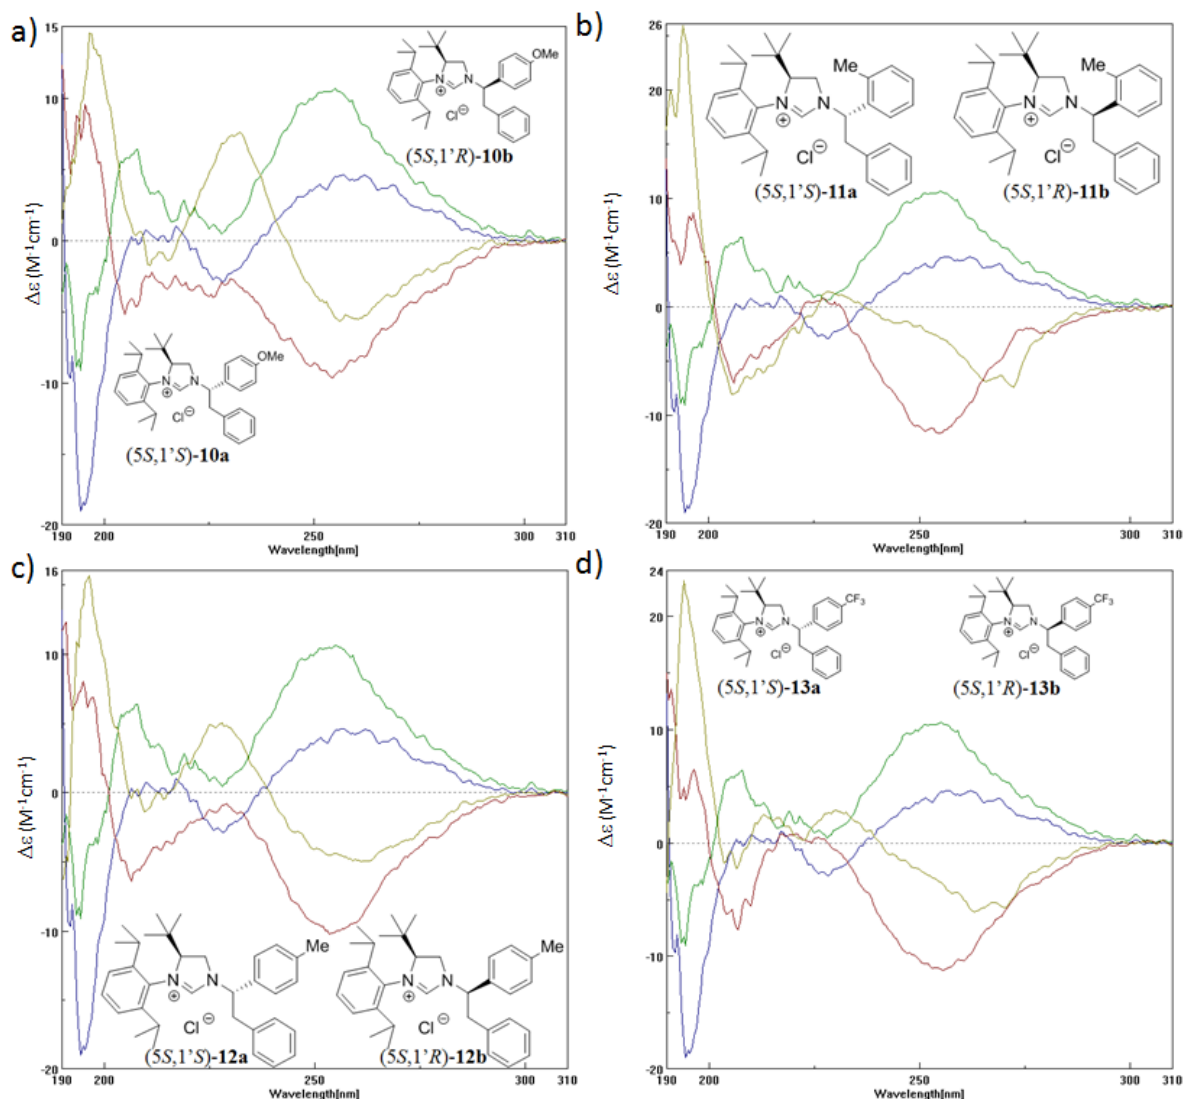

**Figure S170.** a) Experimental ECD spectra of (5*S*,1'*S*)-**10a** (brown) and (5*S*,1'*R*)-**10b** (yellow) compared with the reference ECD spectra of (5*R*,1'*R*)-**5a** (green) and (5*R*,1'*S*)-**5b** (blue). b) Experimental ECD spectra of (5*S*,1'*S*)-**11a** (brown) and (5*S*,1'*R*)-**11b** (yellow) compared with the reference ECD spectra of (5*R*,1'*R*)-**5a** (green) and (5*R*,1'*S*)-**5b** (blue). c) Experimental ECD spectra of (5*S*,1'*S*)-**12a** (brown) and (5*S*,1'*R*)-**12b** (yellow) compared with the reference ECD spectra of (5*R*,1'*R*)-**5a** (green) and (5*R*,1'*S*)-**5b** (blue). d) Experimental ECD spectra of (5*S*,1'*S*)-**13a** (brown) and (5*S*,1'*R*)-**13b** (yellow) compared with the reference ECD spectra of (5*R*,1'*R*)-**5a** (green) and (5*R*,1'*S*)-**5b** (blue).

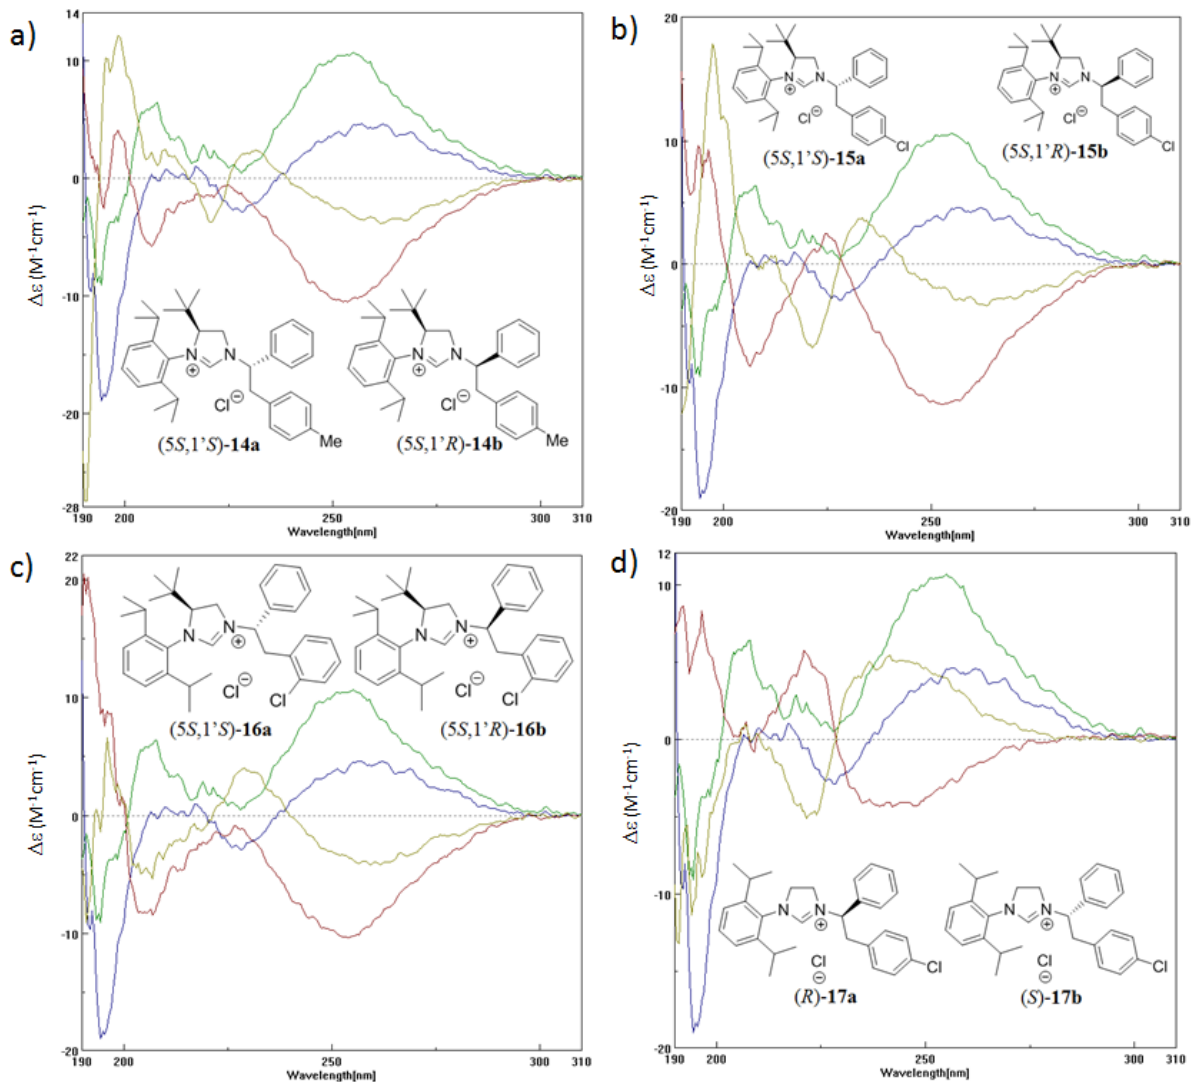

**Figure S171.** a) Experimental ECD spectra of (5*S*,1'*S*)-**14a** (brown) and (5*S*,1'*R*)-**14b** (yellow) compared with the reference ECD spectra of (5*R*,1'*R*)-**5a** (green) and (5*R*,1'*S*)-**5b** (blue). b) Experimental ECD spectra of (5*S*,1'*S*)-**15a** (brown) and (5*S*,1'*R*)-**15b** (yellow) compared with the reference ECD spectra of (5*R*,1'*R*)-**5a** (green) and (5*R*,1'*S*)-**5b** (blue). c) Experimental ECD spectra of (5*S*,1'*S*)-**16a** (brown) and (5*S*,1'*R*)-**16b** (yellow) compared with the reference ECD spectra of (5*R*,1'*R*)-**5a** (green) and (5*R*,1'*S*)-**5b** (blue). d) Experimental ECD spectra of (*R*)-**17a** (brown) and (*S*)-**17b** (yellow) compared with the reference ECD spectra of (5*R*,1'*R*)-**5a** (green) and (5*R*,1'*S*)-**5b** (blue).

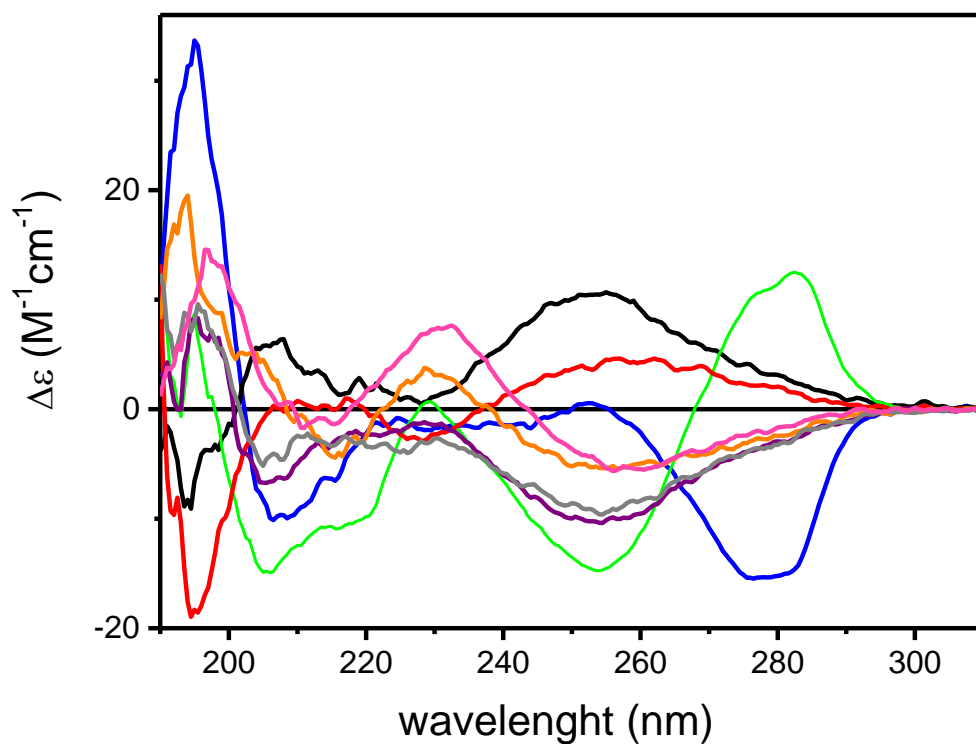

**Figure S172.** Experimental ECD spectra of (5*R*,1'*R*)-**5a** (black) and (5*R*,1'*S*)-**5b** (red) compared with those of (5*S*,1'*S*)-**8a** (green), (5*S*,1'*R*)-**8b** (blue), (5*S*,1'*S*)-**9a** (purple), (5*S*,1'*R*)-**9b** (orange), (5*S*,1'*S*)-**10a** (grey) and (5*S*,1'*R*)-**10b** (pink).

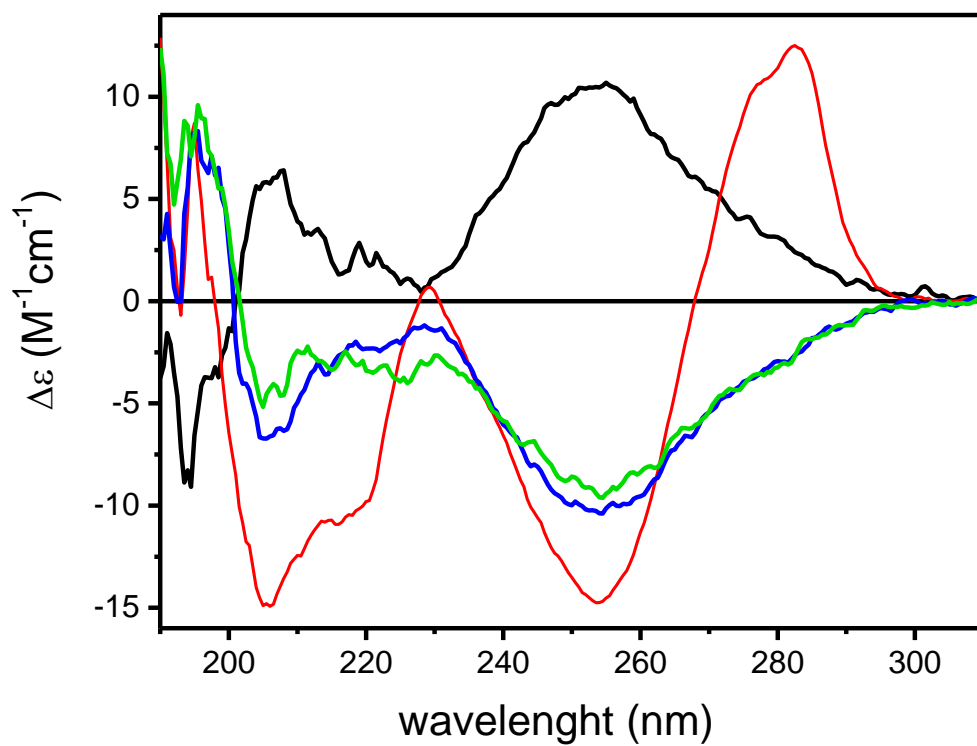

**Figure S173.** Experimental ECD spectra of (5*R*,1'*R*)-**5a** (black), (5*S*,1'*S*)-**8a** (red), (5*S*,1'*S*)-**9a** (blue) and (5*S*,1'*S*)-**10a** (green).



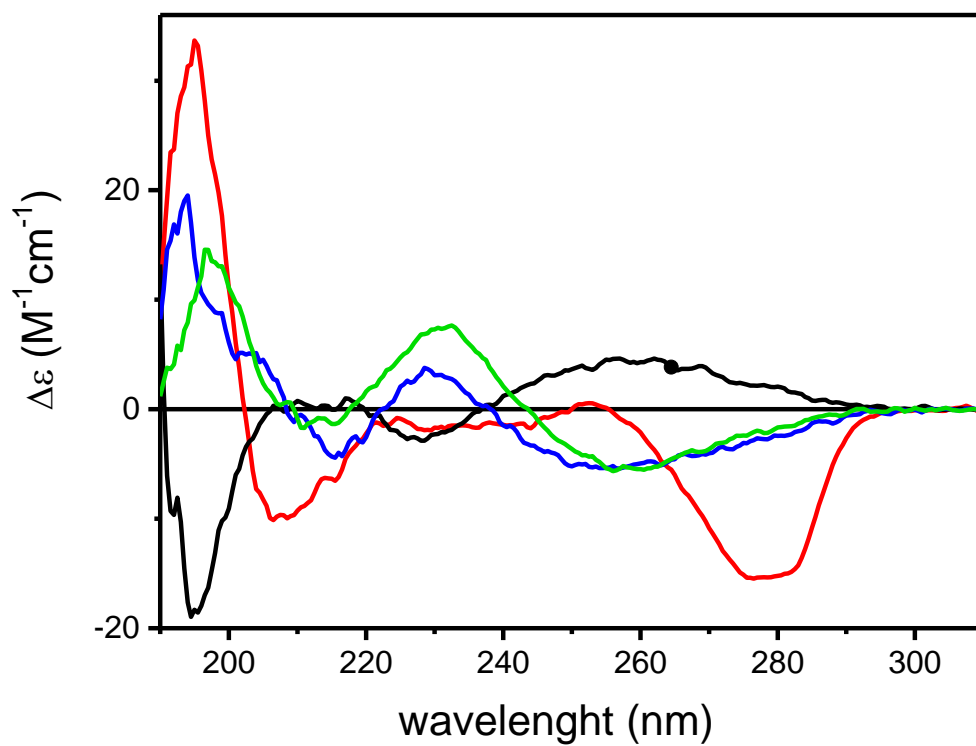

**Figure S174.** Experimental ECD spectra of (5R,1'S)-**5b** (black), (5S,1'R)-**8b** (red), (5S,1'R)-**9b** (blue) and (5S,1'R)-**10b** (green).

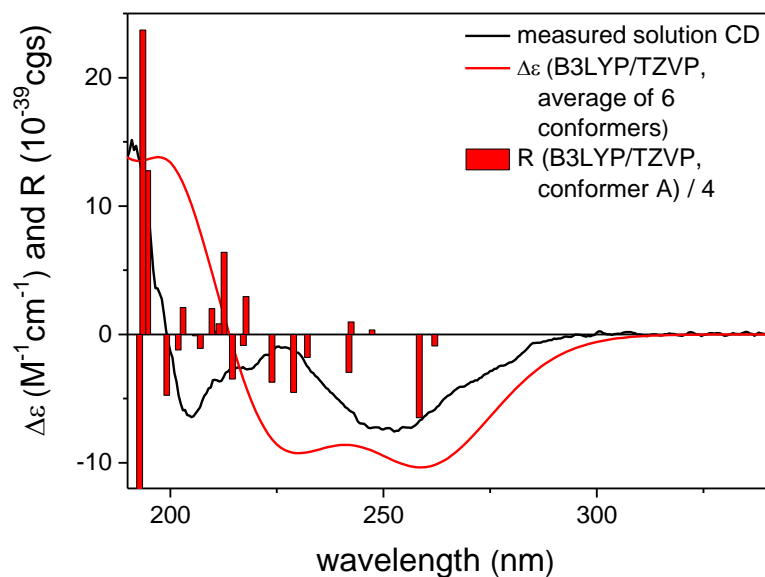

**Figure S175.** Experimental ECD spectrum of (5S,1'S)-**1a** in acetonitrile compared with its B3LYP/TZVP PCM/MeCN // ωB97X/TZVP PCM/MeCN ECD spectrum. Bars represent the computed rotatory strength values.

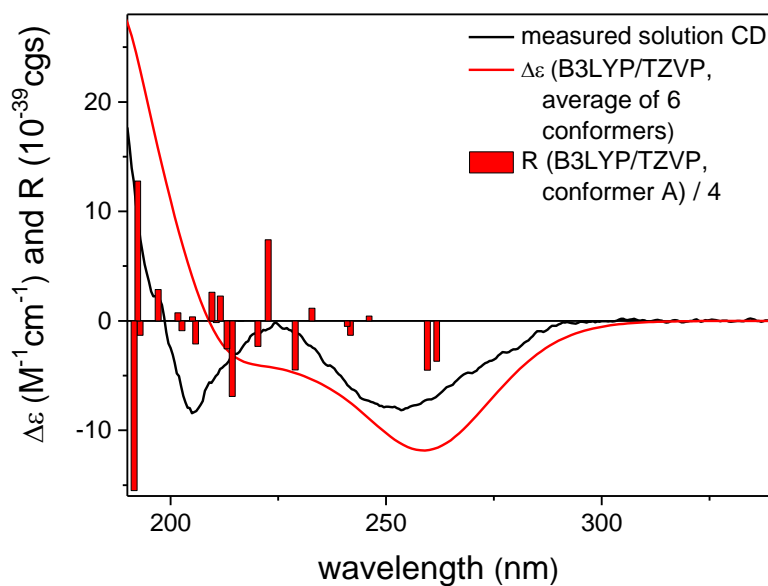

**Figure S176.** Experimental ECD spectrum of (5S,1'R)-**1b** in acetonitrile compared with its B3LYP/TZVP PCM/MeCN // ωB97X/TZVP PCM/MeCN ECD spectrum. Bars represent the computed rotatory strength values.

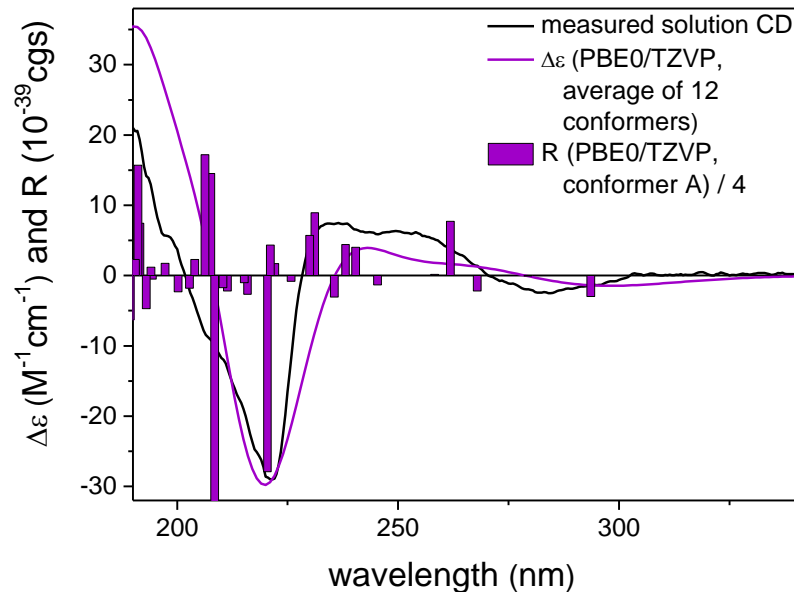

**Figure S177.** Experimental ECD spectrum of (5S,1'S)-**2a** in acetonitrile compared with its PBE0/TZVP PCM/MeCN // ωB97X/TZVP PCM/MeCN ECD spectrum. Bars represent the computed rotatory strength values.

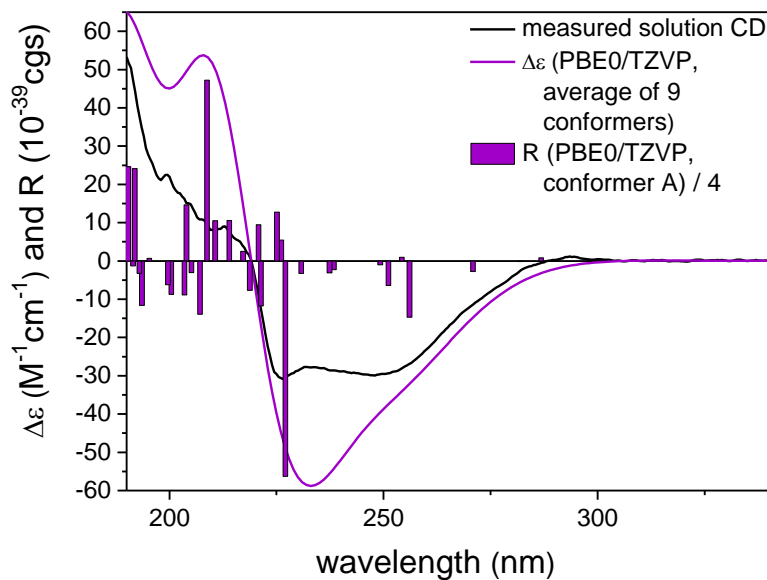

**Figure S178.** Experimental ECD spectrum of (5S,1'R)-**2b** in acetonitrile compared with its PBE0/TZVP PCM/MeCN // ωB97X/TZVP PCM/MeCN ECD spectrum. Bars represent the computed rotatory strength values.

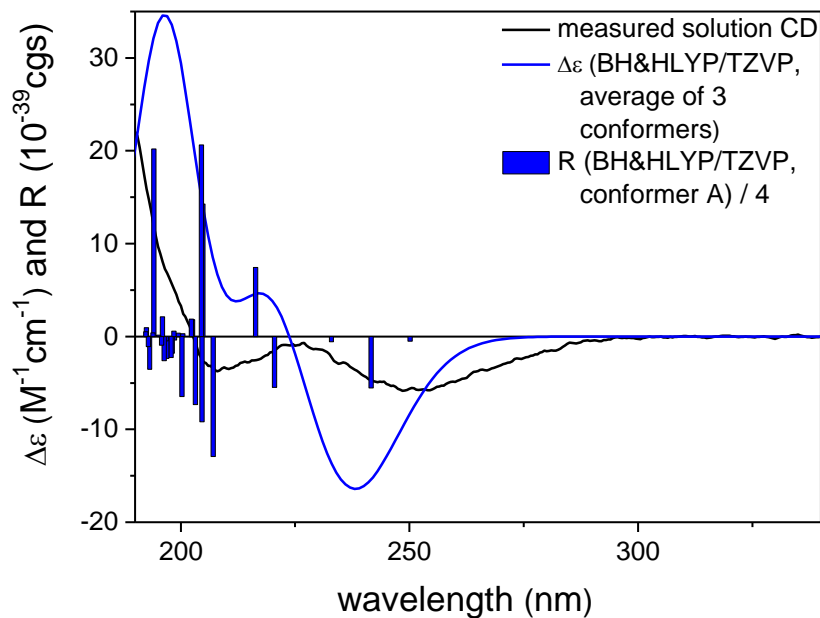

**Figure S179.** Experimental ECD spectrum of (5*S*,1'*S*)-**4a** in acetonitrile compared with its BH&HLYP/TZVP PCM/MeCN //  $\omega$ B97X/TZVP PCM/MeCN ECD spectrum. Bars represent the computed rotatory strength values.

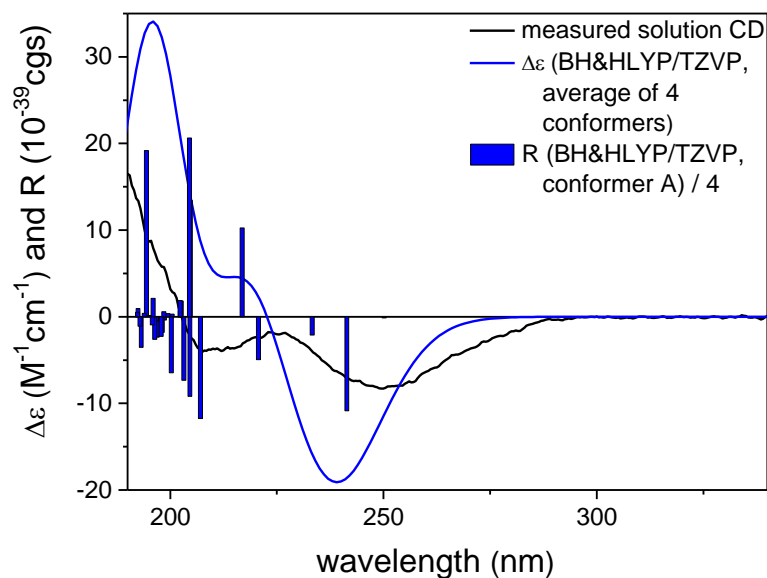

**Figure S180.** Experimental ECD spectrum of (5*S*,1'*R*)-**4b** in acetonitrile compared with its BH&HLYP/TZVP PCM/MeCN //  $\omega$ B97X/TZVP PCM/MeCN spectrum. Bars represent the computed rotatory strength values.

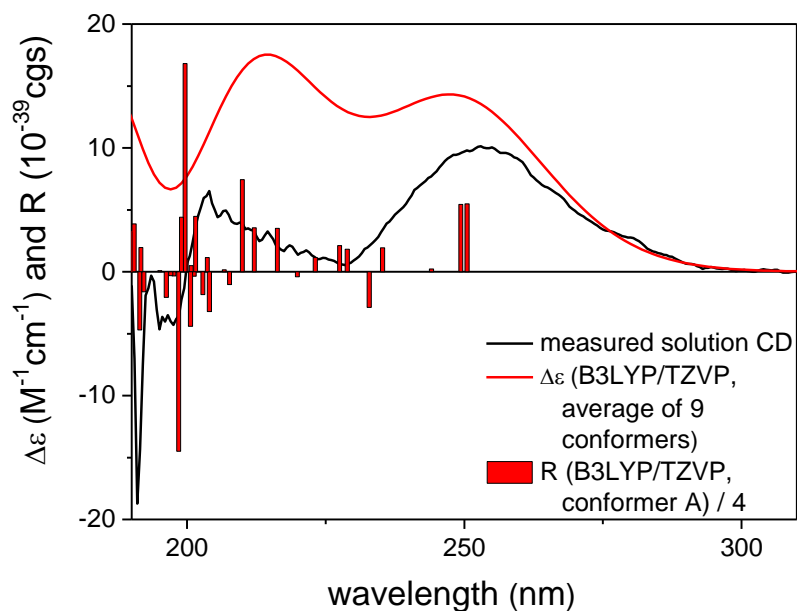

**Figure S181.** Experimental ECD spectrum of (5R,1'R)-5a in acetonitrile compared with its B3LYP/TZVP PCM/MeCN // ωB97X/TZVP PCM/MeCN ECD spectrum. Bars represent the computed rotatory strength values.

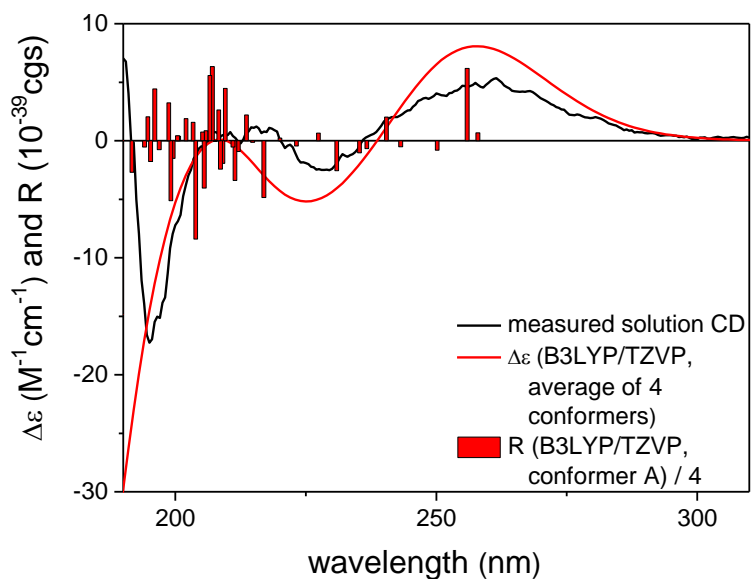

**Figure S182.** Experimental ECD spectrum of (5R,1'S)-5b in acetonitrile compared with its B3LYP/TZVP PCM/MeCN // ωB97X/TZVP PCM/MeCN ECD spectrum. Bars represent the computed rotatory strength values.

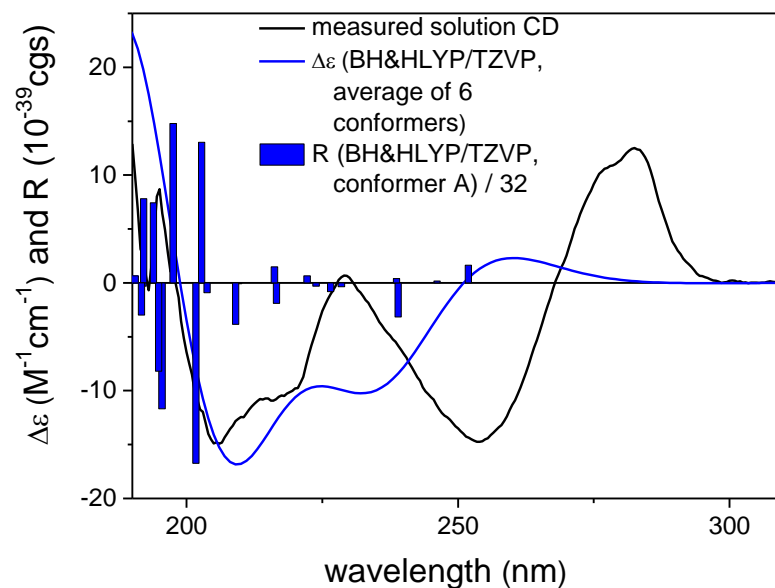

**Figure S183.** Experimental ECD spectrum of (5*S*,1'*S*)-**8a** in acetonitrile compared with its BH&HLYP/TZVP PCM/MeCN //  $\omega$ B97X/TZVP PCM/MeCN ECD spectrum. Bars represent the computed rotatory strength values.

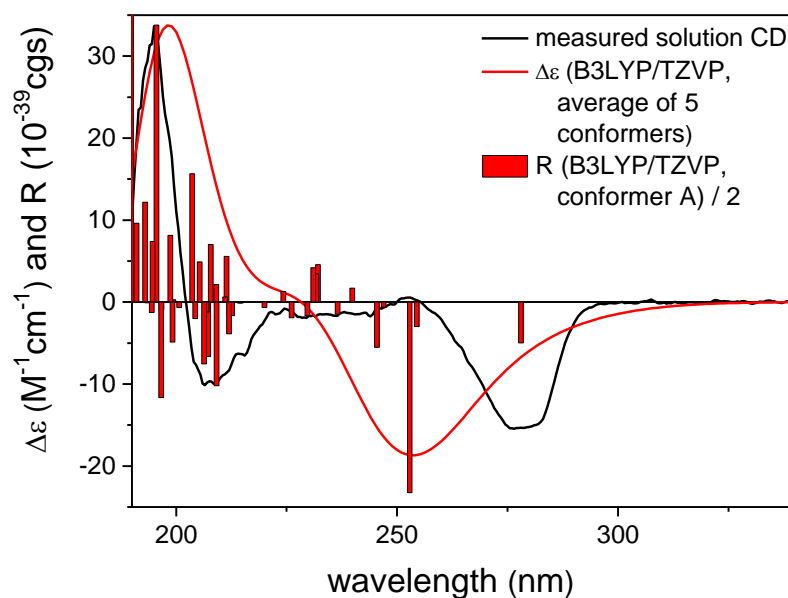

**Figure S184.** Experimental ECD spectrum of (5*S*,1'*R*)-**8b** in acetonitrile compared with its B3LYP/TZVP PCM/MeCN //  $\omega$ B97X/TZVP PCM/MeCN ECD spectrum. Bars represent the computed rotatory strength values.

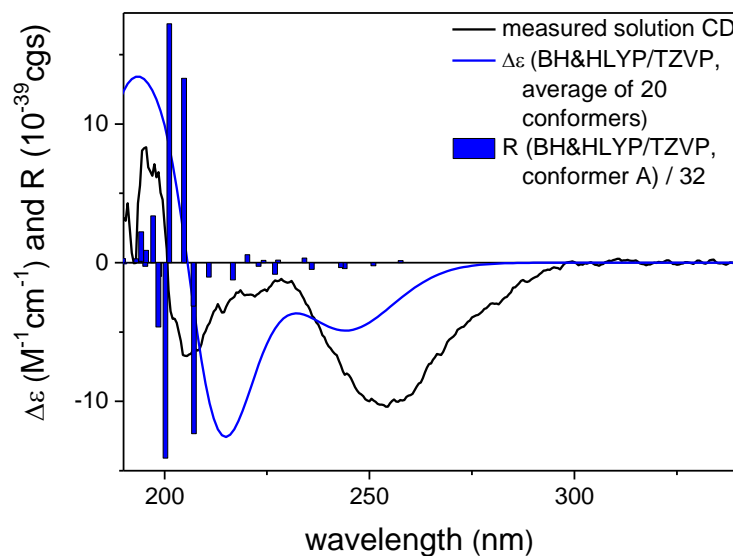

**Figure S185.** Experimental ECD spectrum of (5*S*,1'*S*)-**9a** in acetonitrile compared with its BH&HLYP/TZVP PCM/MeCN // ωB97X/TZVP PCM/MeCN ECD spectrum. Bars represent the computed rotatory strength values.

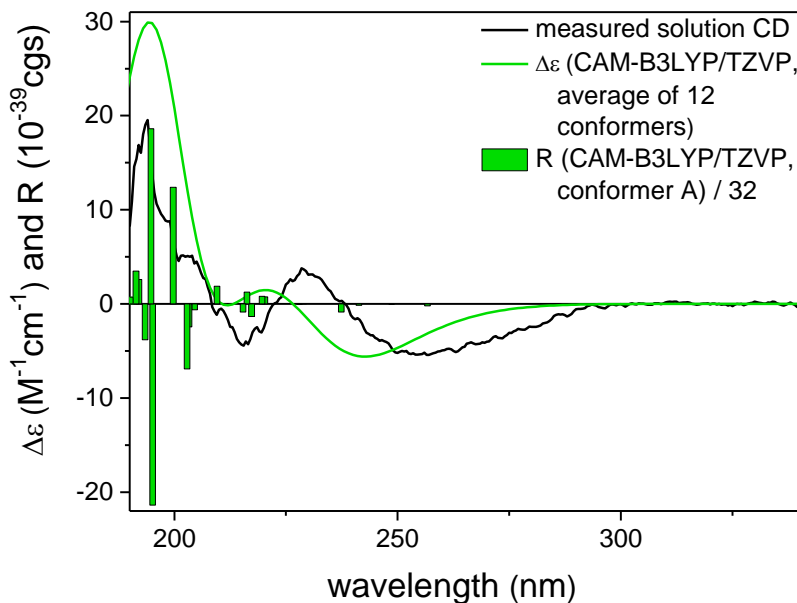

**Figure S186.** Experimental ECD spectrum of (5*S*,1'*R*)-**9b** in acetonitrile compared with its CAM-B3LYP/TZVP PCM/MeCN // ωB97X/TZVP PCM/MeCN ECD spectrum. Bars represent the computed rotatory strength values.

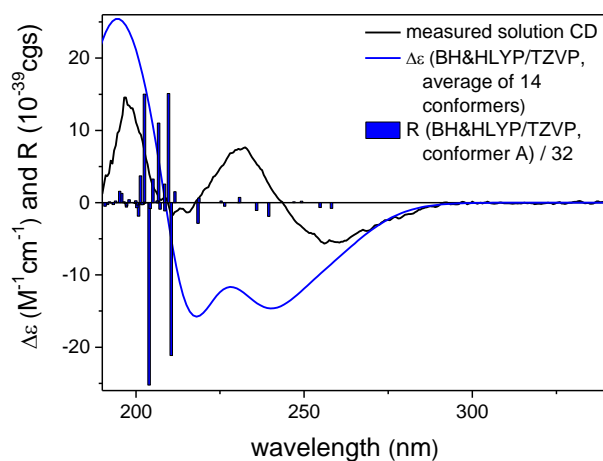

**Figure S187.** Experimental ECD spectrum of (5*S*,1'*S*)-**10a** in acetonitrile compared with its BH&HLYP/TZVP PCM/MeCN // ωB97X/TZVP PCM/MeCN ECD spectrum. Bars represent the computed rotatory strength values.

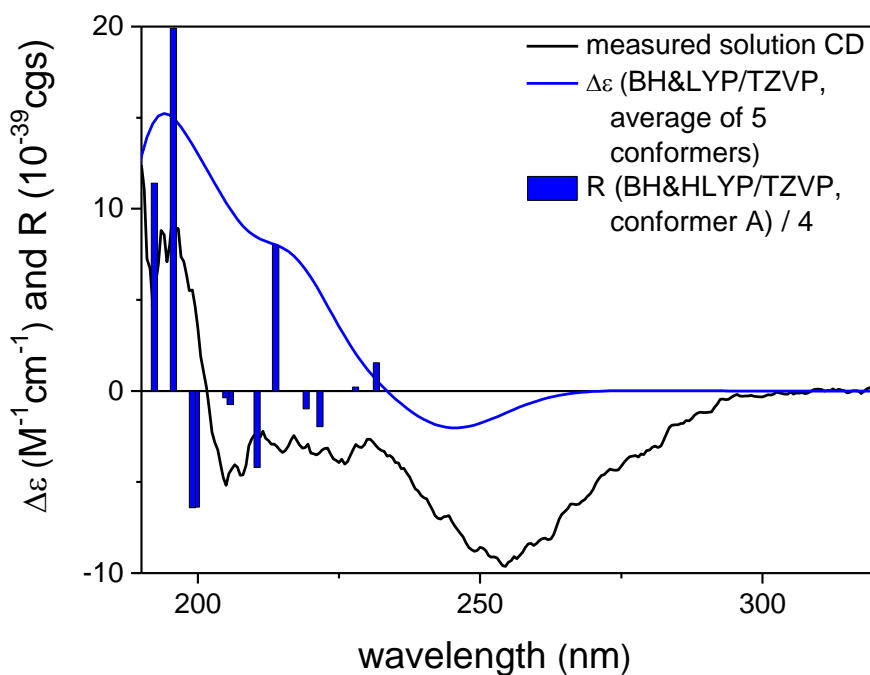

**Figure S188.** Experimental ECD spectrum of (5*S*,1'*R*)-**10b** in acetonitrile compared with its BH&HLYP/TZVP PCM/MeCN // ωB97X/TZVP PCM/MeCN ECD spectrum. Bars represent the computed rotatory strength values.



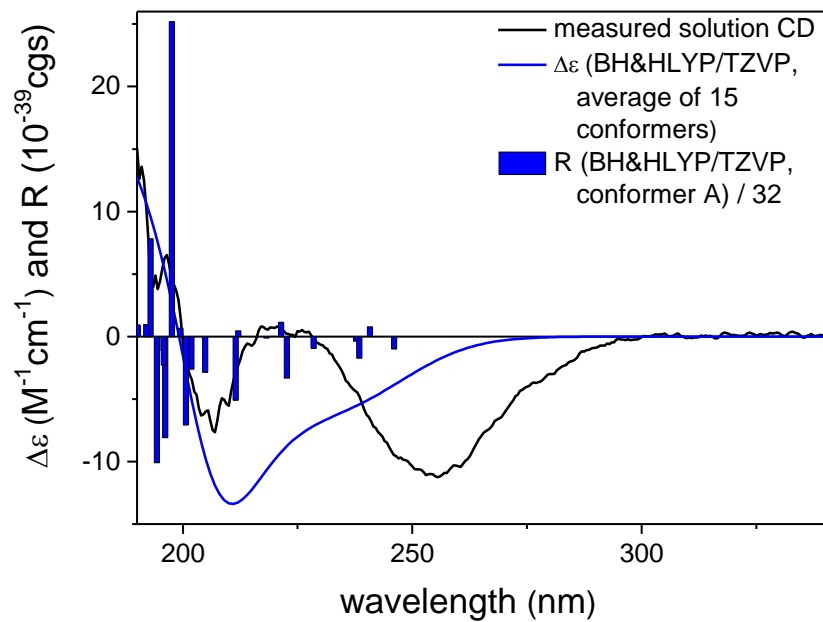

**Figure S189.** Experimental ECD spectrum of (5*S*,1'*S*)-**13a** in acetonitrile compared with its BH&HLYP/TZVP PCM/MeCN //  $\omega$ B97X/TZVP PCM/MeCN ECD spectrum. Bars represent the computed rotatory strength values.

## 6. OR analysis

**Table S1:** Measured specific rotation  $\{[\alpha]_D^{20}\}$  of compounds at the sodium D line (589.3 nm) in MeOH.

| Compound                               | Specific rotation $\{[\alpha]_D^{20}\}$ in MeOH |
|----------------------------------------|-------------------------------------------------|
| (5 <i>S</i> ,1' <i>S</i> )- <b>1a</b>  | −27                                             |
| (5 <i>S</i> ,1' <i>R</i> )- <b>1b</b>  | −46                                             |
| (5 <i>S</i> ,1' <i>S</i> )- <b>2a</b>  | −29                                             |
| (5 <i>S</i> ,1' <i>R</i> )- <b>2b</b>  | −188                                            |
| (5 <i>S</i> ,1' <i>S</i> )- <b>3a</b>  | −35                                             |
| (5 <i>S</i> ,1' <i>R</i> )- <b>3b</b>  | +50                                             |
| (5 <i>S</i> ,1' <i>S</i> )- <b>4a</b>  | −10                                             |
| (5 <i>S</i> ,1' <i>R</i> )- <b>4b</b>  | −55                                             |
| (5 <i>R</i> ,1' <i>R</i> )- <b>5a</b>  | +61                                             |
| (5 <i>R</i> ,1' <i>S</i> )- <b>5b</b>  | −61                                             |
| (5 <i>R</i> ,1' <i>R</i> )- <b>6a</b>  | +58                                             |
| (5 <i>R</i> ,1' <i>S</i> )- <b>6b</b>  | −50                                             |
| (5 <i>R</i> ,1' <i>R</i> )- <b>7a</b>  | +63                                             |
| (5 <i>R</i> ,1' <i>S</i> )- <b>7b</b>  | −39                                             |
| (5 <i>S</i> ,1' <i>S</i> )- <b>8a</b>  | −52                                             |
| (5 <i>S</i> ,1' <i>R</i> )- <b>8b</b>  | −32                                             |
| (5 <i>S</i> ,1' <i>S</i> )- <b>9a</b>  | −70                                             |
| (5 <i>S</i> ,1' <i>R</i> )- <b>9b</b>  | +49                                             |
| (5 <i>S</i> ,1' <i>S</i> )- <b>10a</b> | −76                                             |
| (5 <i>S</i> ,1' <i>R</i> )- <b>10b</b> | +42                                             |
| (5 <i>S</i> ,1' <i>S</i> )- <b>11a</b> | −80                                             |
| (5 <i>S</i> ,1' <i>R</i> )- <b>11b</b> | +31                                             |
| (5 <i>S</i> ,1' <i>S</i> )- <b>12a</b> | −87                                             |
| (5 <i>S</i> ,1' <i>R</i> )- <b>12b</b> | +50                                             |
| (5 <i>S</i> ,1' <i>S</i> )- <b>13a</b> | −70                                             |
| (5 <i>S</i> ,1' <i>R</i> )- <b>13b</b> | +33                                             |
| (5 <i>S</i> ,1' <i>S</i> )- <b>14a</b> | −88                                             |
| (5 <i>S</i> ,1' <i>R</i> )- <b>14b</b> | +45                                             |
| (5 <i>S</i> ,1' <i>S</i> )- <b>15a</b> | −82                                             |
| (5 <i>S</i> ,1' <i>R</i> )- <b>15b</b> | +36                                             |
| (5 <i>S</i> ,1' <i>S</i> )- <b>16a</b> | −97                                             |
| (5 <i>S</i> ,1' <i>R</i> )- <b>16b</b> | +70                                             |
| ( <i>R</i> )- <b>17a</b>               | −51                                             |
| ( <i>S</i> )- <b>17b</b>               | +40                                             |

**Table S2:** Measured specific rotation  $\{[\alpha]_D^{20}\}$  in MeOH compared with the four computed average values (basis set: TZVP, solvent model: PCM/MeOH).

| Compound                              | Experimental<br>$[\alpha]_D^{20}$ | B3LYP   | BH&HLYP | CAM-B3LYP | PBE0    |
|---------------------------------------|-----------------------------------|---------|---------|-----------|---------|
| (5 <i>R</i> ,1' <i>R</i> )- <b>5a</b> | +61                               | +196    | +148    | +159      | +191    |
| (5 <i>R</i> ,1' <i>S</i> )- <b>5b</b> | −61                               | −91     | −93     | −94       | −91     |
| (5 <i>S</i> ,1' <i>S</i> )- <b>8a</b> | −52                               | −180    | −137    | −145      | −174    |
| (5 <i>S</i> ,1' <i>R</i> )- <b>8b</b> | −32                               | +12     | +29     | +24       | +13     |
| (5 <i>S</i> ,1' <i>S</i> )- <b>2a</b> | −29                               | −97.18  | −67.25  | −74.00    | −91.42  |
| (5 <i>S</i> ,1' <i>R</i> )- <b>2b</b> | −188                              | −153.58 | −103.94 | −109.76   | −148.50 |

**Table S3.** Boltzmann populations and optical rotations of the low-energy conformers of (5*S*,1'*S*)-**2a** computed at various levels for the  $\omega$ B97X/TZVP PCM/MeCN optimized MMFF conformers (basis set: TZVP, solvent model: PCM/MeOH).

| Conformer | Boltzmann<br>population | B3LYP   | BH&HLYP | CAM-<br>B3LYP | PBE0    |
|-----------|-------------------------|---------|---------|---------------|---------|
| Conf. A   | 36.95 %                 | −149.48 | −109.15 | −115.44       | −143.43 |
| Conf. B   | 34.90 %                 | −8.98   | +0.10   | −6.66         | −3.36   |
| Conf. C   | 13.84 %                 | −224.49 | −161.15 | −169.44       | −216.5  |
| Conf. D   | 8.93 %                  | −76.34  | −54.45  | −61.39        | −73.72  |
| Conf. E   | 5.37 %                  | −16.81  | +4.22   | −1.36         | −12.66  |
| Average   | N/A                     | −97.18  | −67.25  | −74.00        | −91.42  |

**Table S4.** Boltzmann populations and optical rotations of the low-energy conformers of (5*S*,1'*R*)-**2b** computed at various levels for the  $\omega$ B97X/TZVP PCM/MeCN optimized MMFF conformers (basis set: TZVP, solvent model: PCM/MeOH).

| Conformer | Boltzmann<br>population | B3LYP   | BH&HLYP | CAM-<br>B3LYP | PBE0    |
|-----------|-------------------------|---------|---------|---------------|---------|
| Conf. A   | 78.18 %                 | −174.47 | −120.01 | −125.77       | −168.9  |
| Conf. B   | 9.77 %                  | −31.64  | −9.97   | −13.89        | −29.37  |
| Conf. C   | 7.02 %                  | −101.78 | −56.13  | −65.05        | −97.82  |
| Conf. D   | 3.83 %                  | −170.37 | −128.31 | −134.44       | −165.08 |
| Conf. E   | 0.98 %                  | −8.74   | −5.9    | −12.01        | −6.77   |
| Average   | N/A                     | −153.58 | −103.94 | −109.76       | −148.50 |

**Table S5.** Boltzmann populations and optical rotations of the low-energy conformers of (5*R*,1'*R*)-**5a** computed at various levels for the  $\omega$ B97X/TZVP PCM/MeCN optimized MMFF conformers (basis set: TZVP, solvent model: PCM/MeOH).

| Conformer | Boltzmann population | B3LYP   | BH&HLYP | CAM-B3LYP | PBE0    |
|-----------|----------------------|---------|---------|-----------|---------|
| Conf. A   | 33.06 %              | +274.02 | +214.79 | +228.96   | +266.24 |
| Conf. B   | 31.43 %              | +275.18 | +216.65 | +230.98   | +267.75 |
| Conf. C   | 13.73 %              | +85.94  | +52.18  | +59.12    | +83.35  |
| Conf. D   | 9.76 %               | -23.19  | -39.26  | -37.44    | -23.23  |
| Conf. E   | 3.57 %               | +203.52 | +164.47 | +173.33   | +200.25 |
| Conf. F   | 3.43 %               | -116.95 | -126.39 | -122.21   | -116.63 |
| Conf. G   | 2.23 %               | +199.01 | +162.88 | +173.23   | +195.56 |
| Conf. H   | 1.34 %               | +96.99  | +49.97  | +55.45    | +91.66  |
| Conf. I   | 1.17 %               | +74     | -1.43   | +6.04     | +37.44  |
| Average   | N/A                  | +196.68 | +148.67 | +159.87   | +191.06 |

**Table S6.** Boltzmann populations and optical rotations of the low-energy conformers of (5*R*,1'*S*)-**5b** computed at various levels for the  $\omega$ B97X/TZVP PCM/MeCN optimized MMFF conformers (basis set: TZVP, solvent model: PCM/MeOH).

| Conformer | Boltzmann population | B3LYP   | BH&HLYP | CAM-B3LYP | PBE0    |
|-----------|----------------------|---------|---------|-----------|---------|
| Conf. A   | 48.52 %              | -113.4  | -112.29 | -113.57   | -112.43 |
| Conf. B   | 42.97 %              | -99.14  | -101.30 | -101.61   | -98.92  |
| Conf. C   | 3.84 %               | +278.49 | +227.00 | +235.73   | +271.71 |
| Conf. D   | 3.56 %               | -93.12  | -97.75  | -98.79    | -94.52  |
| Average   | N/A                  | -91.27  | -93.83  | -94.29    | -91.01  |

**Table S7.** Boltzmann populations and optical rotations of the low-energy conformers of (5*S*,1'*S*)-**8a** computed at various levels for the  $\omega$ B97X/TZVP PCM/MeOH optimized MMFF conformers (basis set: TZVP, solvent model: PCM/MeOH).

| Conformer | Boltzmann population | B3LYP   | BH&HLYP | CAM-B3LYP | PBE0    |
|-----------|----------------------|---------|---------|-----------|---------|
| Conf. A   | 82.68 %              | -191.28 | -147.85 | -155.87   | -184.66 |
| Conf. B   | 8.41 %               | -124.43 | -82.62  | -89.86    | -120.79 |
| Conf. C   | 4.28 %               | -163.22 | -133.17 | -142.33   | -160.77 |
| Conf. D   | 1.40 %               | -79.98  | -44.90  | -46.52    | -73.08  |
| Conf. E   | 1.04 %               | +22.02  | +51.62  | +42.48    | +24.18  |
| Average   | N/A                  | -180.43 | -137.99 | -145.92   | -174.29 |

**Table S8.** Boltzmann populations and optical rotations of the low-energy conformers of (5*S*,1'*R*)-**8b** computed at various levels for the  $\omega$ B97X/TZVP PCM/MeOH optimized MMFF conformers (basis set: TZVP, solvent model: PCM/MeOH).

| Conformer | Boltzmann population | B3LYP   | BH&HLYP | CAM-B3LYP | PBE0    |
|-----------|----------------------|---------|---------|-----------|---------|
| Conf. A   | 72.73 %              | +34.54  | +49.65  | +44.55    | +35.02  |
| Conf. B   | 12.18 %              | +73.84  | +81.52  | +80.73    | +74.98  |
| Conf. C   | 9.34 %               | −243.56 | −196.02 | −203.09   | −235.76 |
| Average   | N/A                  | +12.05  | +29.41  | +24.67    | +13.34  |

## 7. Low-energy conformers

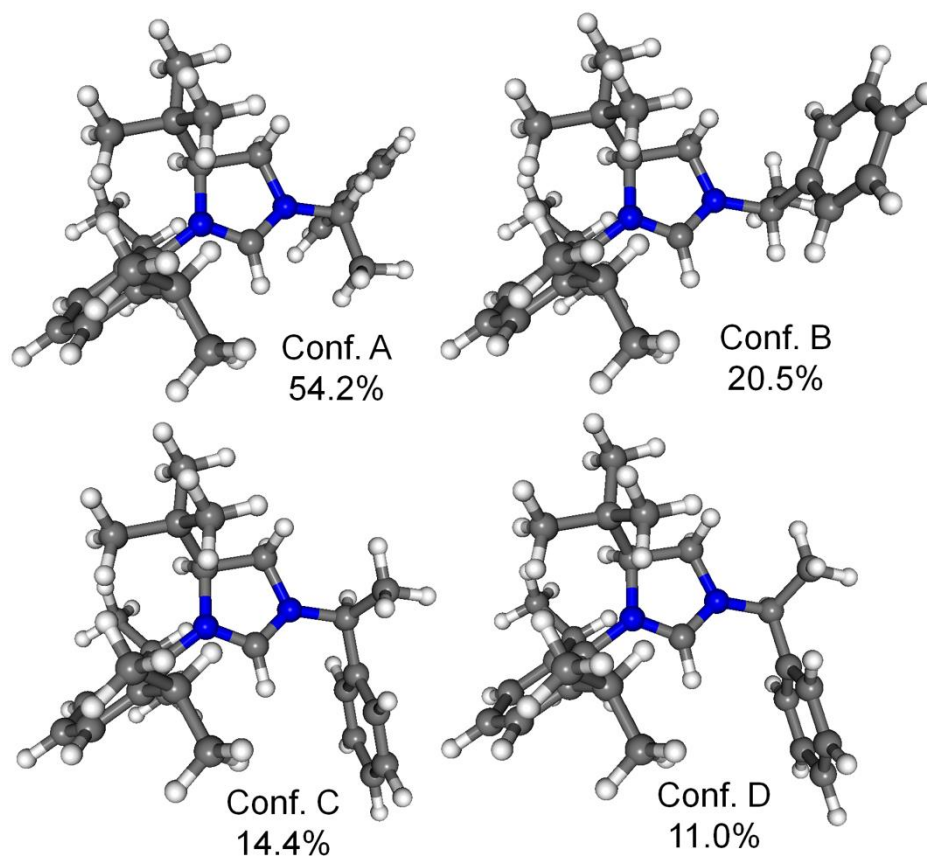

**Figure S190.** Structure and population of the low-energy B3LYP/TZVP PCM (solvent: CHCl<sub>3</sub>) conformers ( $\geq 1\%$ ) of (5*S*,1'*S*)-**1a**.

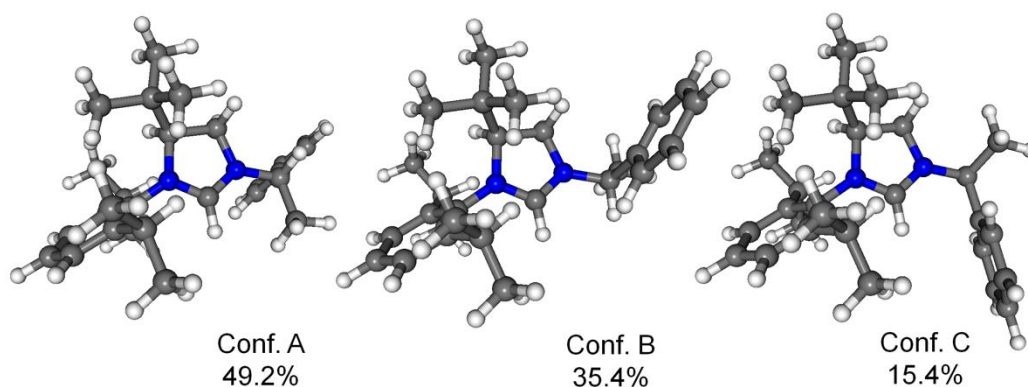

**Figure S191.** Structure and population of the low-energy  $\omega$ B97X/TZVP PCM (solvent: acetonitrile) conformers ( $\geq 1\%$ ) of (5*S*,1'*S*)-**1a**.

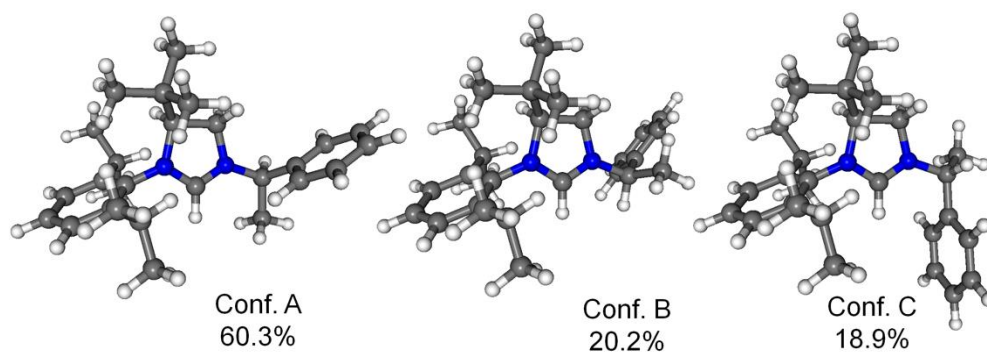

**Figure S192.** Structure and population of the low-energy B3LYP/TZVP PCM (solvent:  $\text{CHCl}_3$ ) conformers ( $\geq 1\%$ ) of (5*S*,1'*R*)-**1b**.

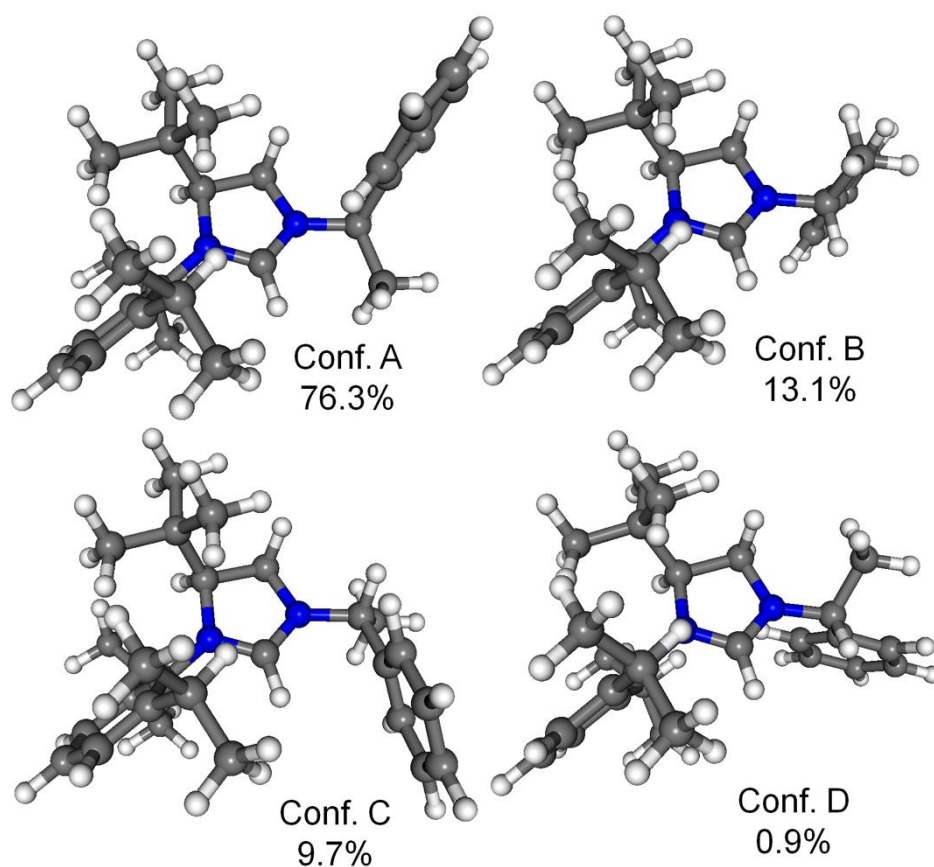

**Figure S193.** Structure and population of the low-energy  $\omega$ B97X/TZVP PCM (solvent: acetonitrile) conformers ( $\geq 1\%$ ) of (5*S*,1'*R*)-**1b**.

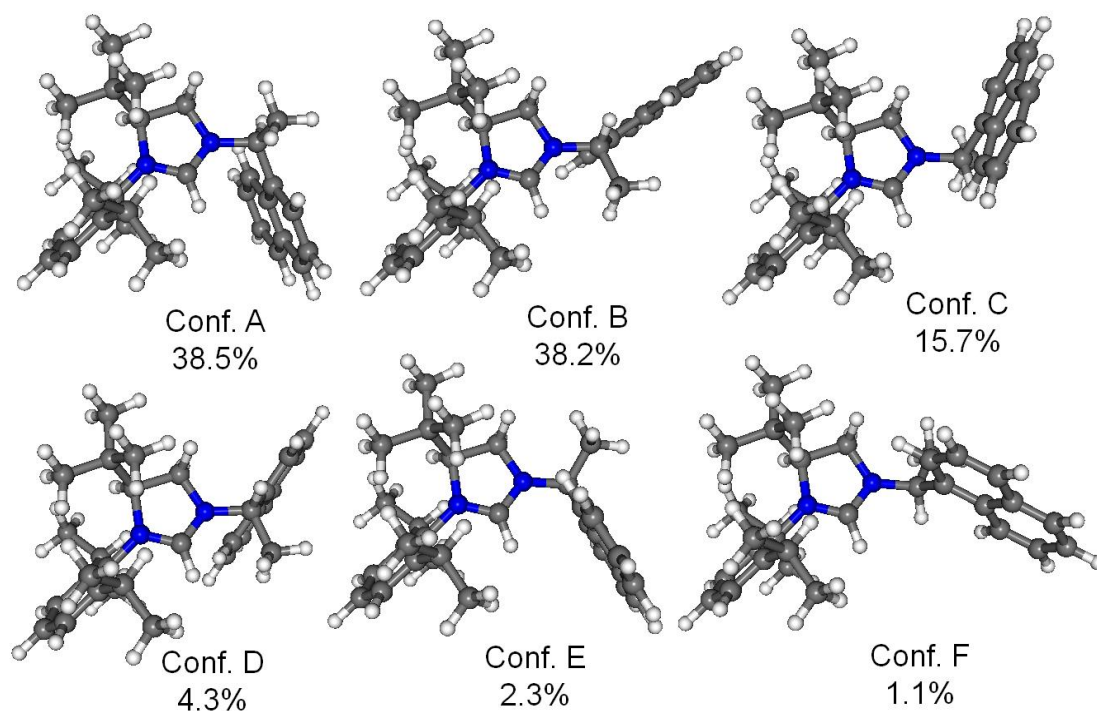

**Figure S194.** Structure and population of the low-energy B3LYP/TZVP PCM (solvent:  $\text{CHCl}_3$ ) conformers ( $\geq 1\%$ ) of (5*S*,1'*S*)-**2a**.

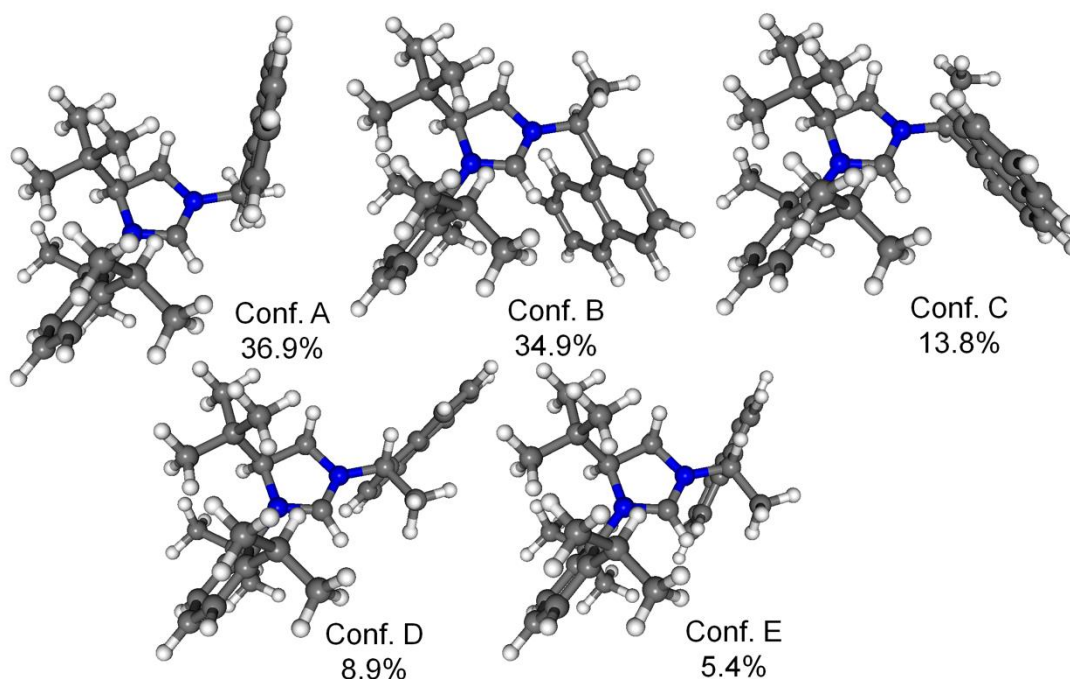

**Figure S195.** Structure and population of the low-energy  $\omega$ B97X/TZVP PCM (solvent: acetonitrile) conformers ( $\geq 1\%$ ) of (5*S*,1'*S*)-**2a**.



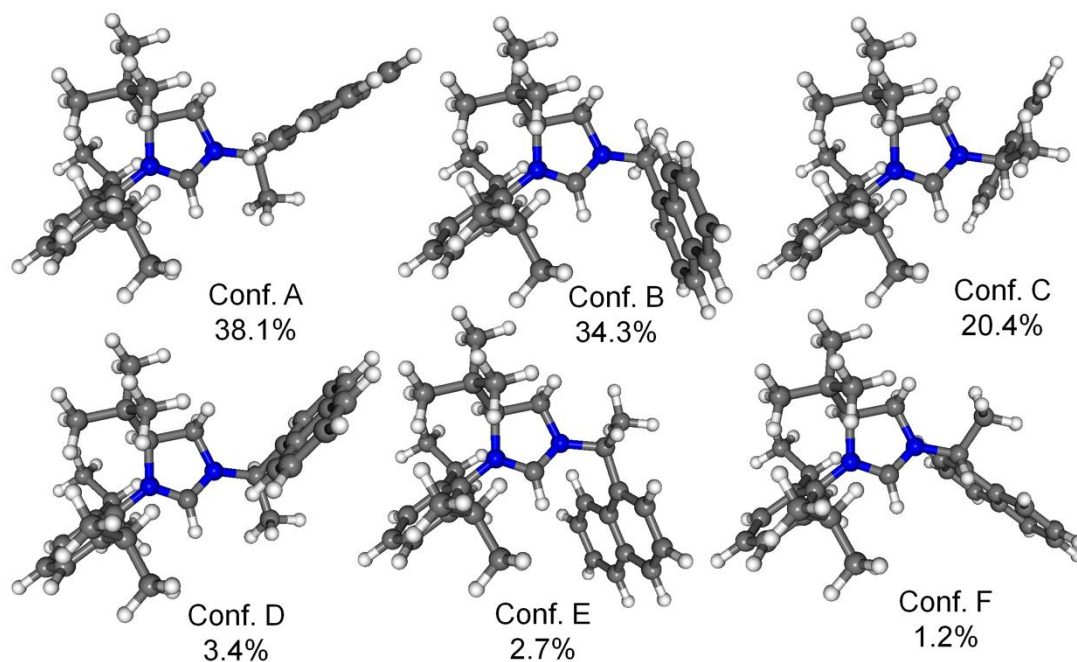

**Figure S196.** Structure and population of the low-energy B3LYP/TZVP PCM (solvent:  $\text{CHCl}_3$ ) conformers ( $\geq 1\%$ ) of (5*S*,1'*R*)-**2b**.

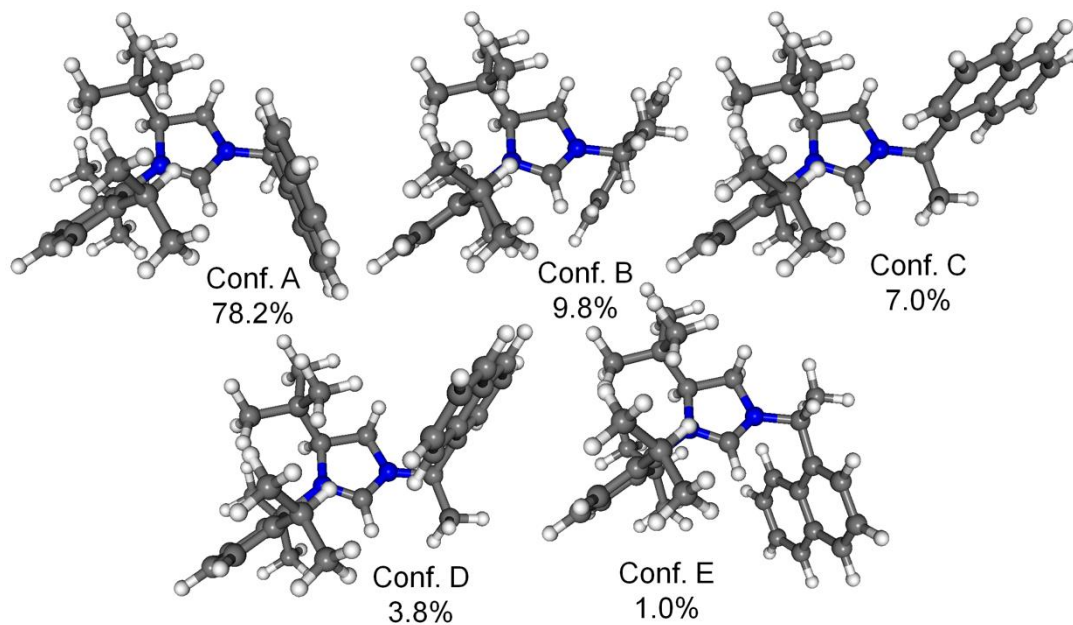

**Figure S197.** Structure and population of the low-energy  $\omega$ B97X/TZVP PCM (solvent: acetonitrile) conformers ( $\geq 1\%$ ) of (5*S*,1'*R*)-**2b**.

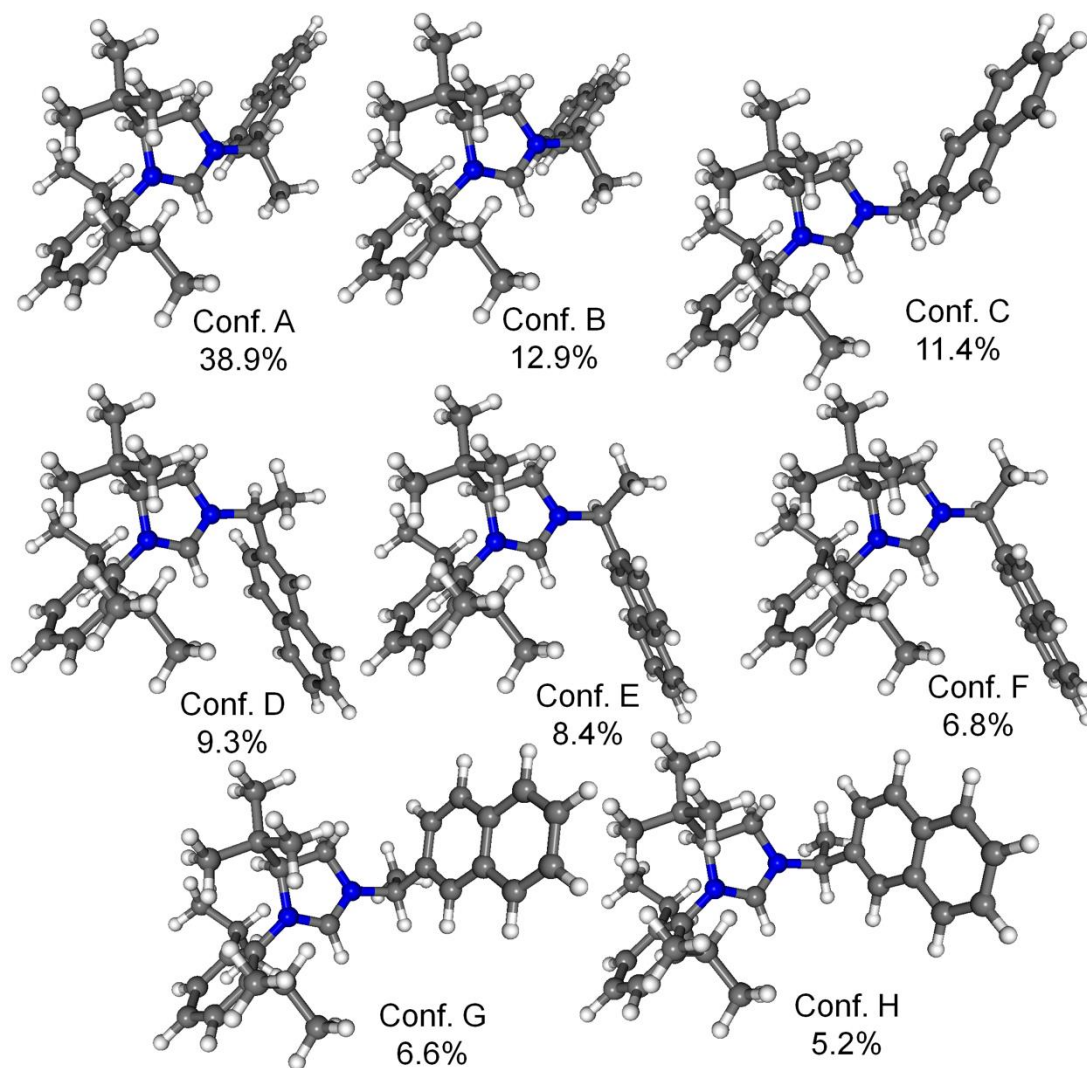

**Figure S198.** Structure and population of the low-energy B3LYP/TZVP PCM (solvent:  $\text{CHCl}_3$ ) conformers ( $\geq 1\%$ ) of  $(5S,1'S)$ -**3a**.

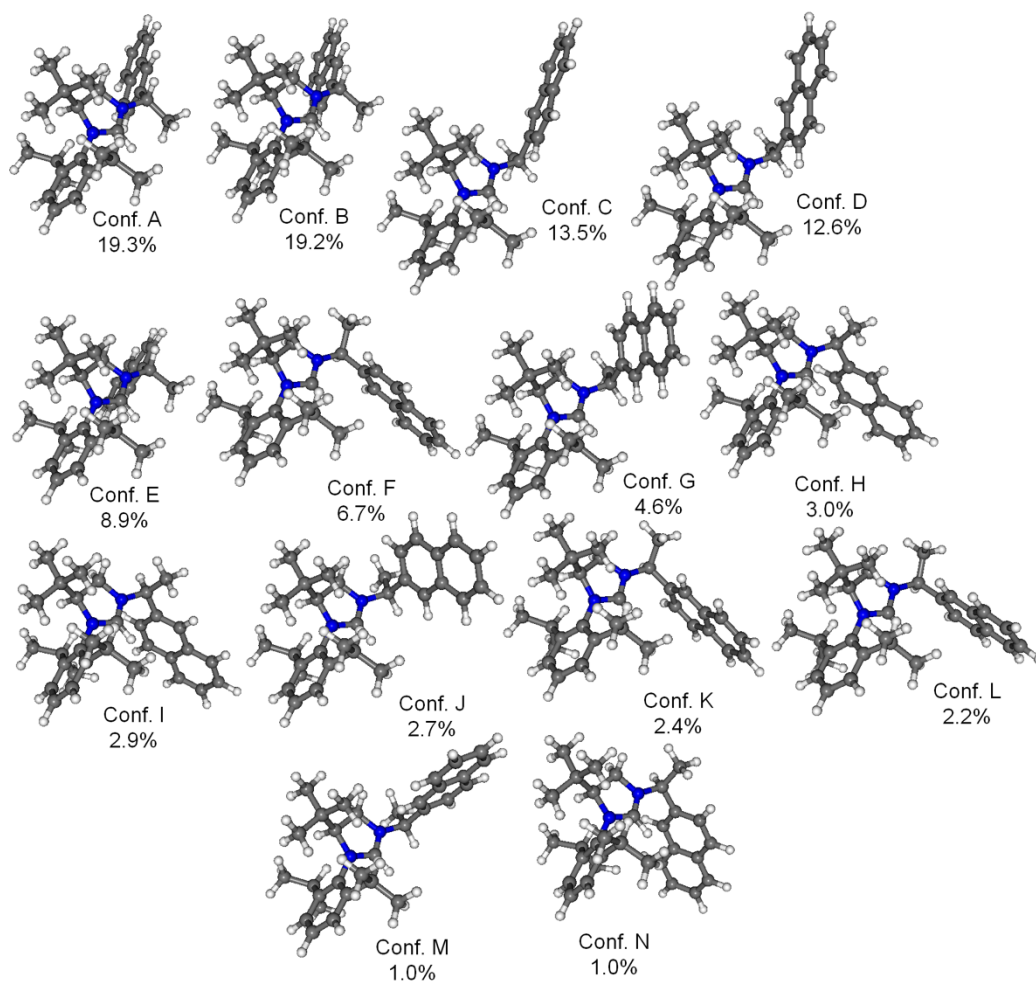

**Figure S199.** Structure and population of the low-energy  $\omega$ B97X/TZVP PCM (solvent: acetonitrile) conformers ( $\geq 1\%$ ) of (5*S*,1'*S*)-**3a**.

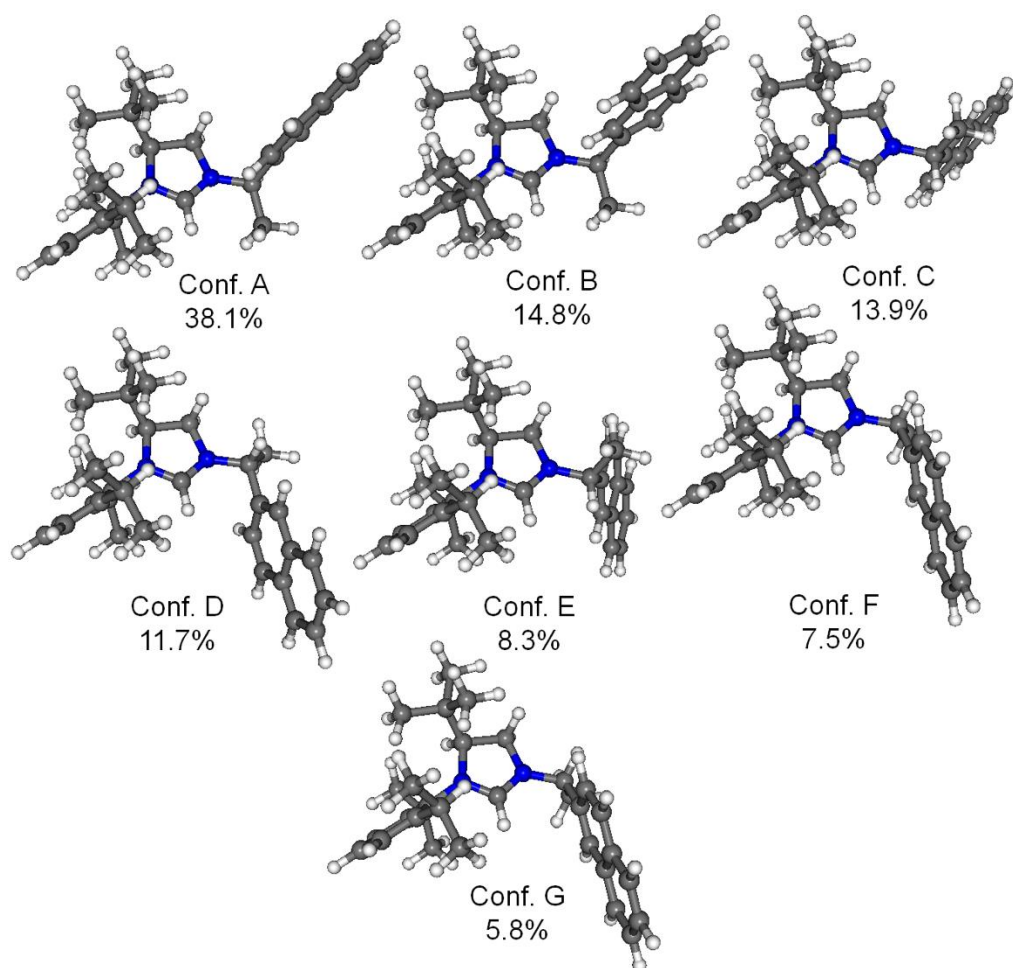

**Figure S200.** Structure and population of the low-energy B3LYP/TZVP PCM (solvent: CHCl<sub>3</sub>) conformers ( $\geq 1\%$ ) of (5*S*,1'*R*)-**3b**.

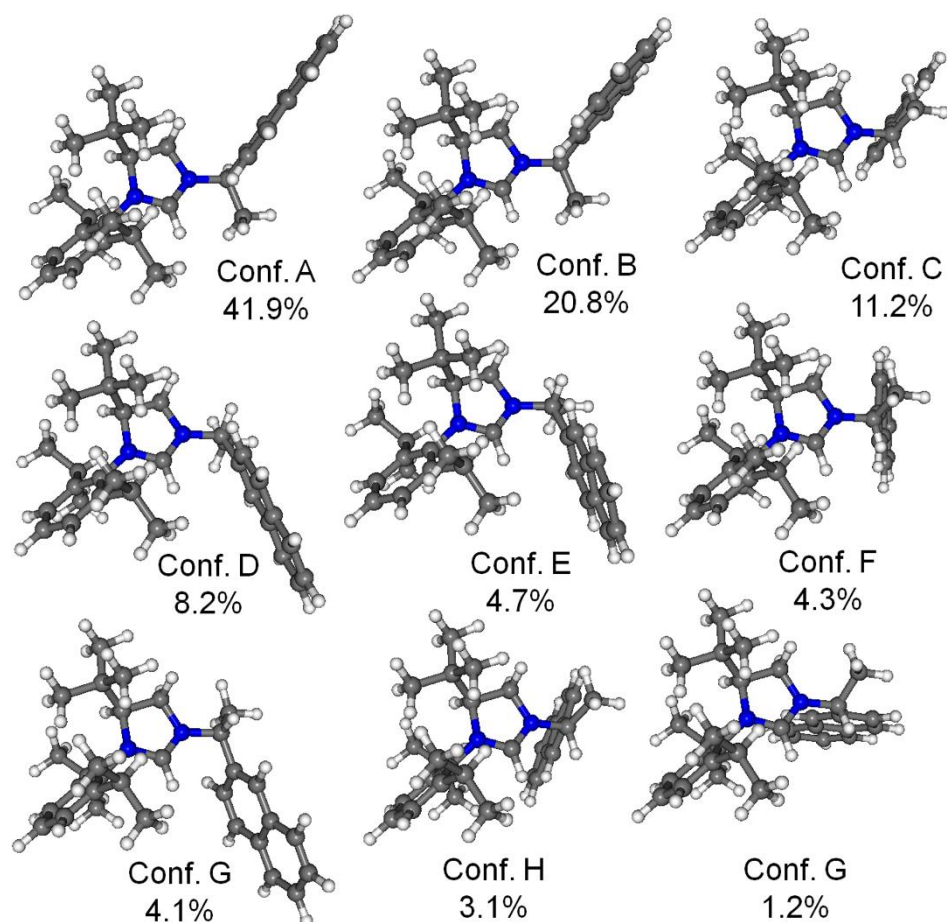

**Figure S201.** Structure and population of the low-energy  $\omega$ B97X/TZVP PCM (solvent: acetonitrile) conformers ( $\geq 1\%$ ) of (5*S*,1'*R*)-**3b**.

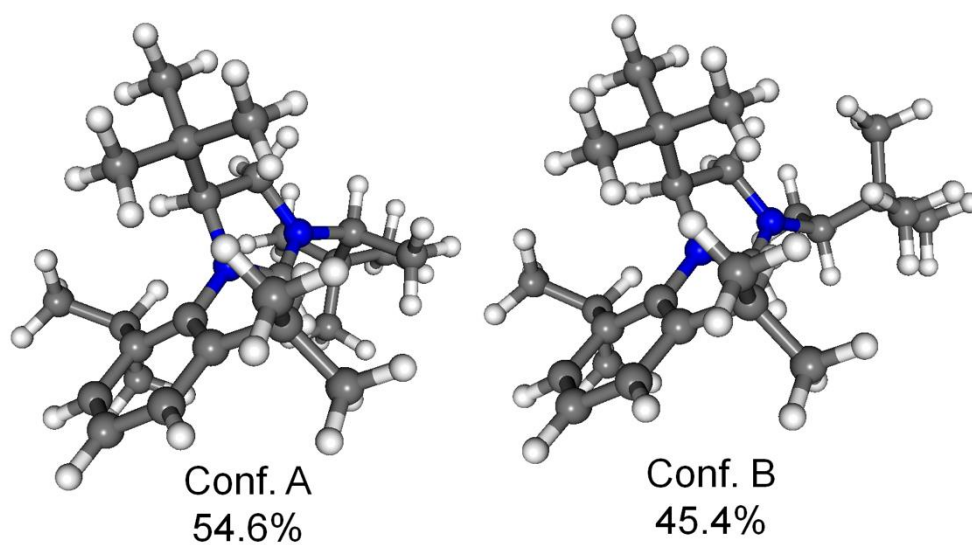

**Figure S202.** Structure and population of the low-energy B3LYP/TZVP PCM (solvent:  $\text{CHCl}_3$ ) conformers ( $\geq 1\%$ ) of (5*S*,1'*S*)-**4a**.



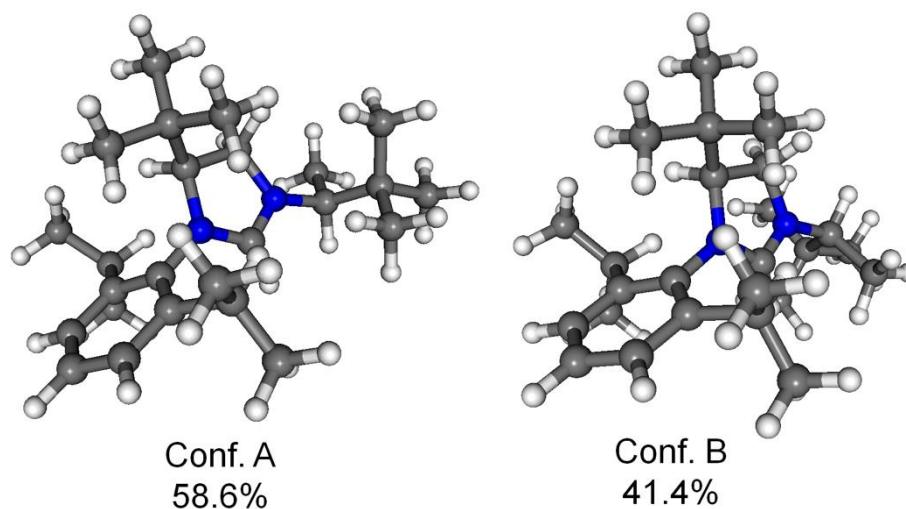

**Figure S203.** Structure and population of the low-energy  $\omega$ B97X/TZVP PCM (solvent: acetonitrile) conformers ( $\geq 1\%$ ) of (5*S*,1'*S*)-**4a**.

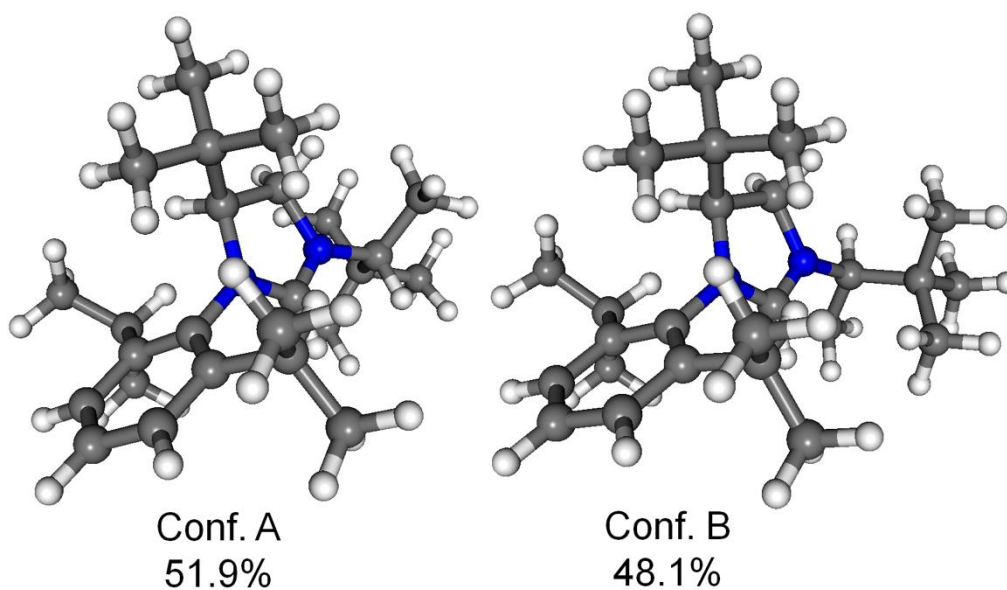

**Figure S204.** Structure and population of the low-energy B3LYP/TZVP PCM (solvent:  $\text{CHCl}_3$ ) conformers ( $\geq 1\%$ ) of (5*S*,1'*R*)-**4b**.

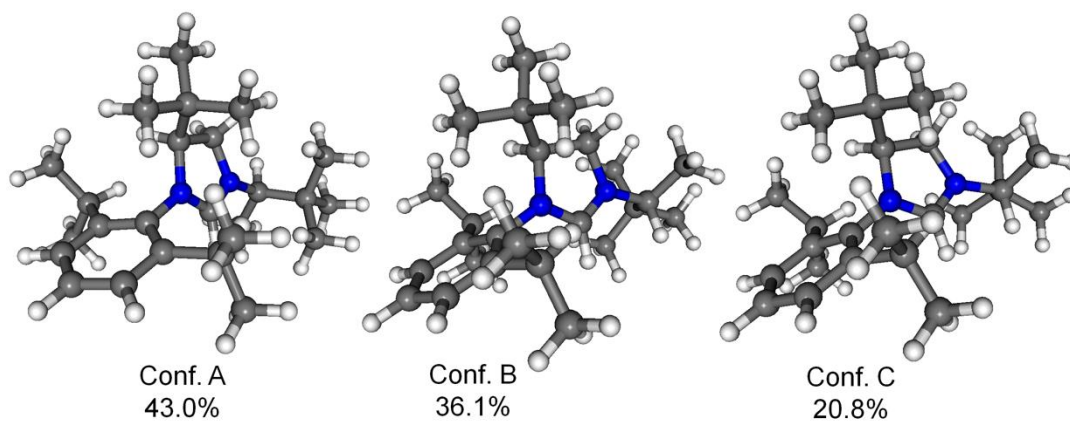

**Figure S205.** Structure and population of the low-energy  $\omega$ B97X/TZVP PCM (solvent: acetonitrile) conformers ( $\geq 1\%$ ) of (5*S*,1'*R*)-**4b**.

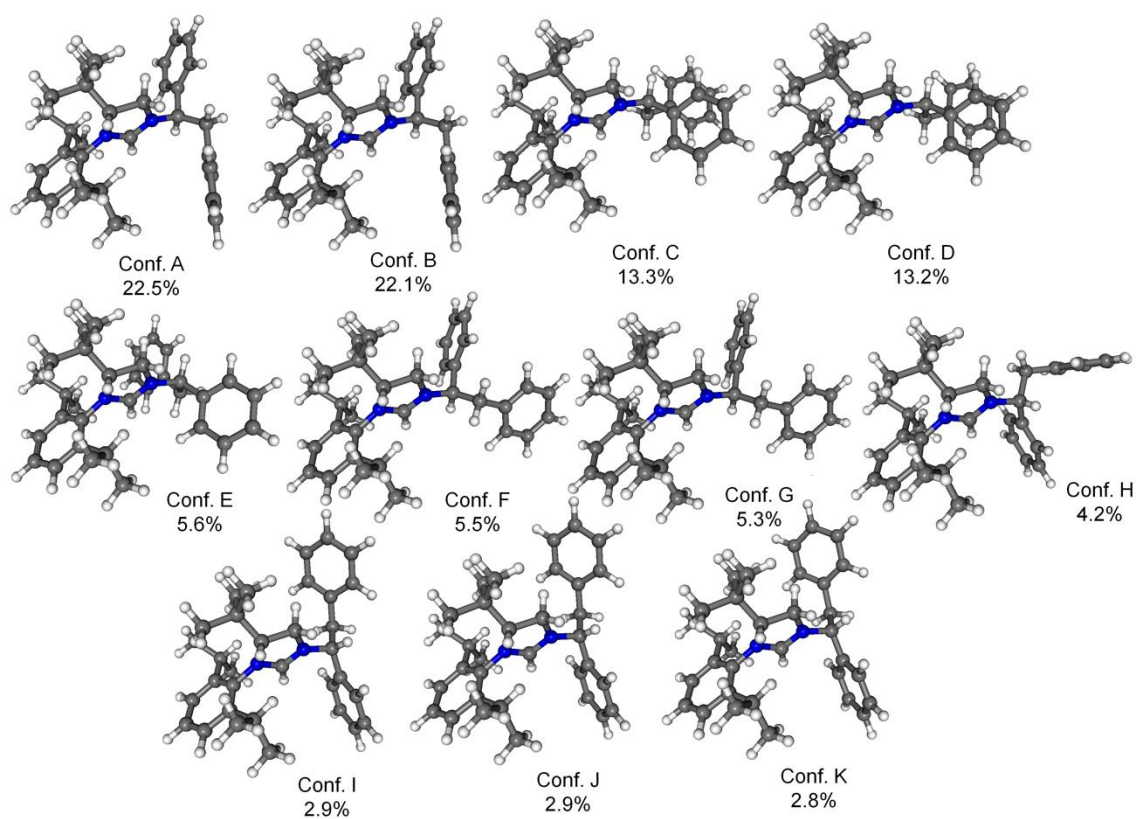

**Figure S206.** Structure and population of the low-energy B3LYP/TZVP PCM (solvent:  $\text{CHCl}_3$ ) conformers ( $\geq 1\%$ ) of (5*R*,1'*R*)-**5a**.

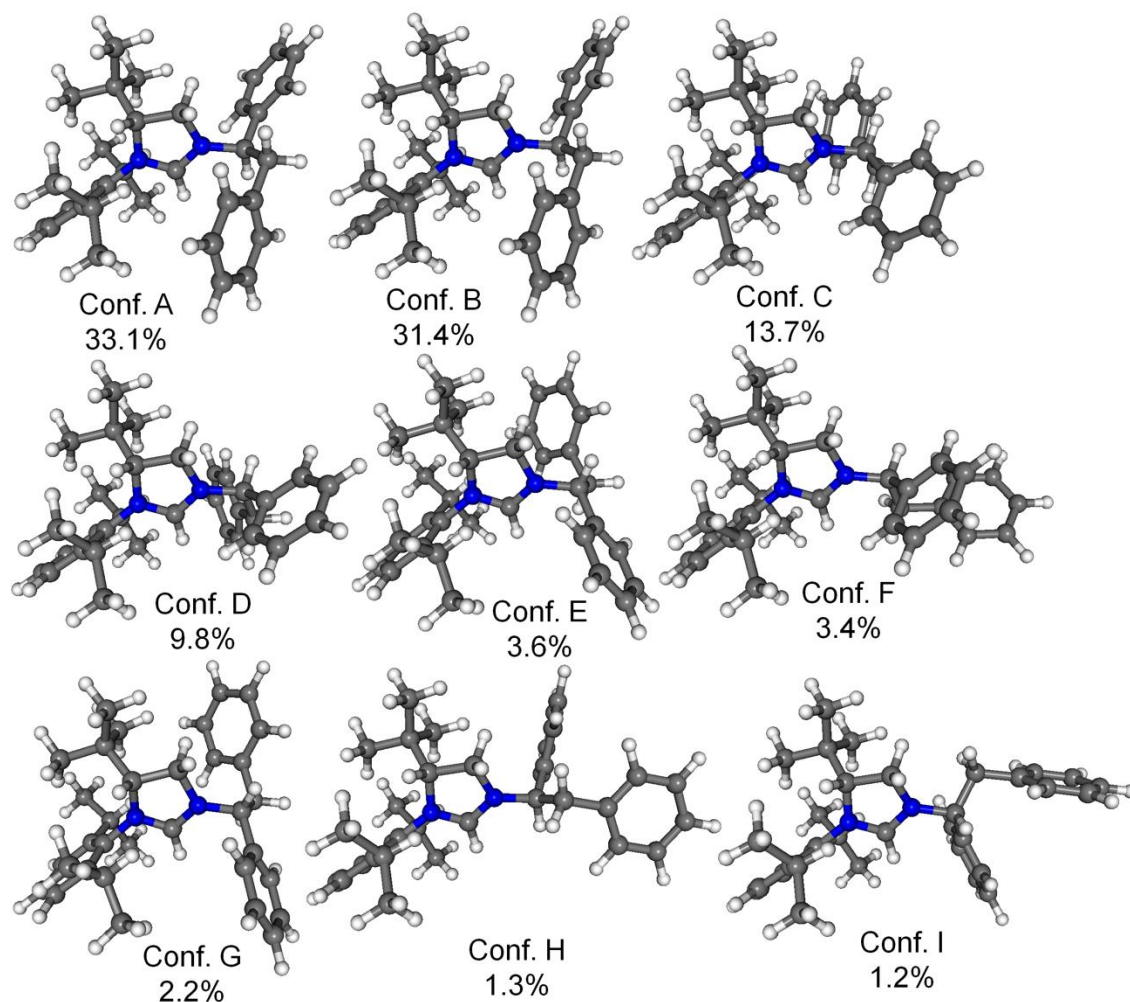

**Figure S207.** Structure and population of the low-energy  $\omega$ B97X/TZVP PCM (solvent: acetonitrile) conformers ( $\geq 1\%$ ) of (5*R*,1'*R*)-**5a**.

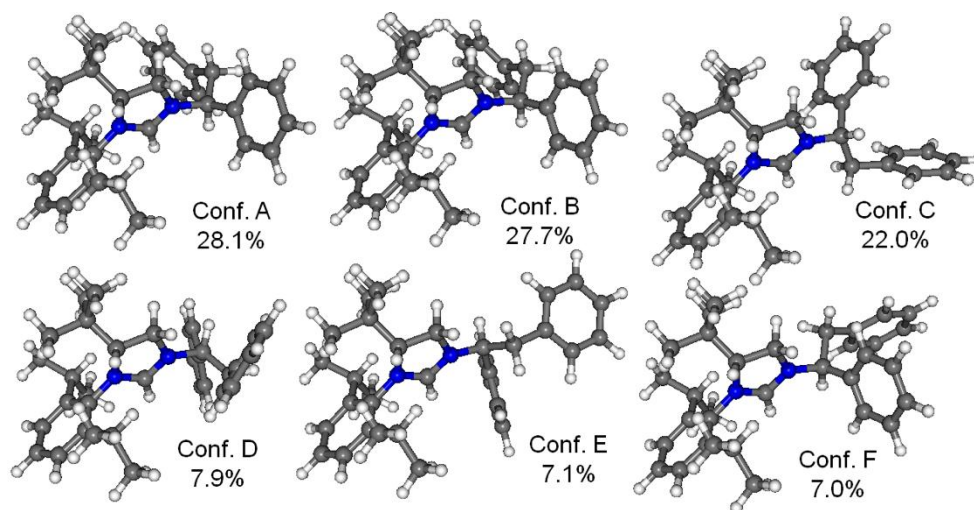

**Figure S208.** Structure and population of the low-energy B3LYP/TZVP PCM (solvent:  $\text{CHCl}_3$ ) conformers ( $\geq 1\%$ ) of (5*R*,1'*S*)-**5b**.



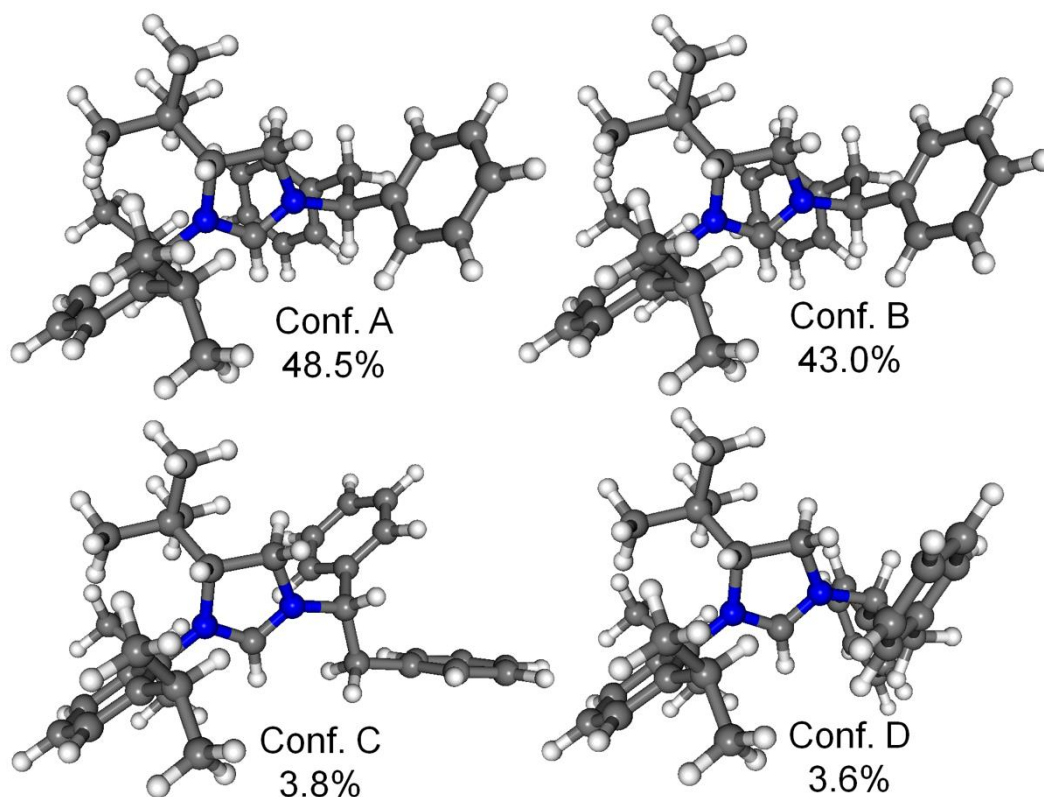

**Figure S209.** Structure and population of the low-energy  $\omega$ B97X/TZVP PCM (solvent: acetonitrile) conformers ( $\geq 1\%$ ) of (5*R*,1'*S*)-**5b**.

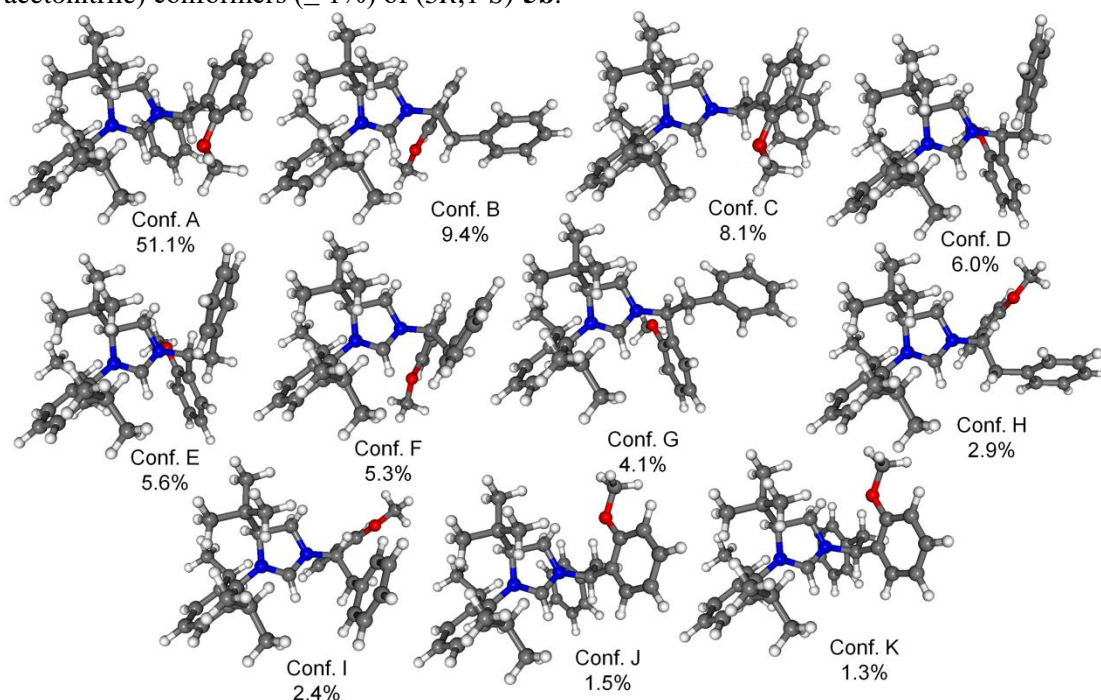

**Figure S210.** Structure and population of the low-energy B3LYP/TZVP PCM (solvent:  $\text{CHCl}_3$ ) conformers ( $\geq 1\%$ ) of (5*S*,1'*S*)-**8a**.

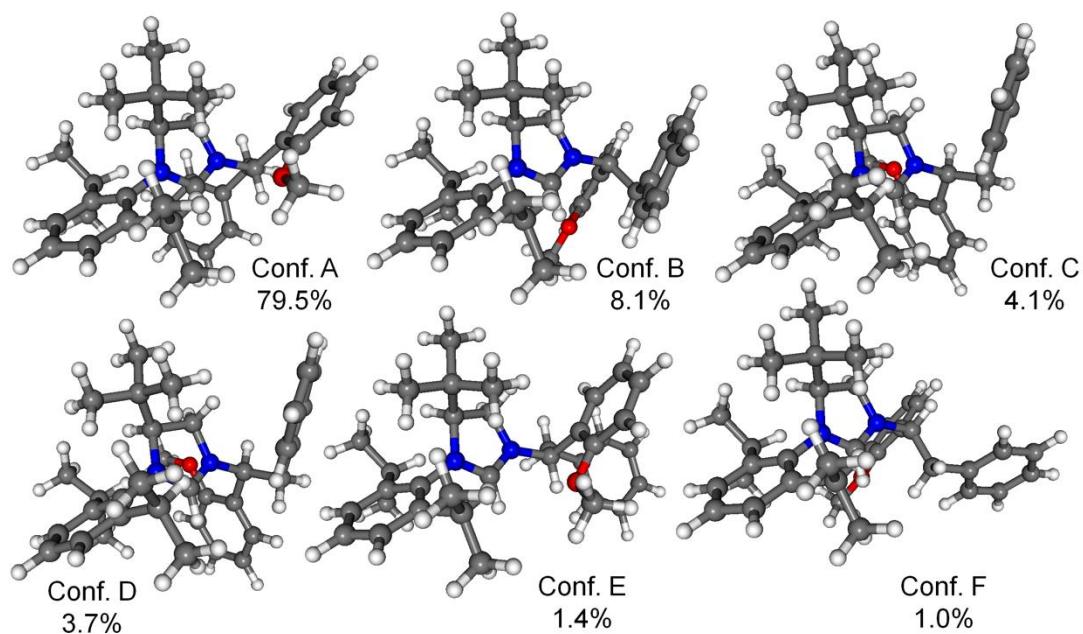

**Figure S211.** Structure and population of the low-energy  $\omega$ B97X/TZVP PCM (solvent: acetonitrile) conformers ( $\geq 1\%$ ) of (5*S*,1'*S*)-**8a**.

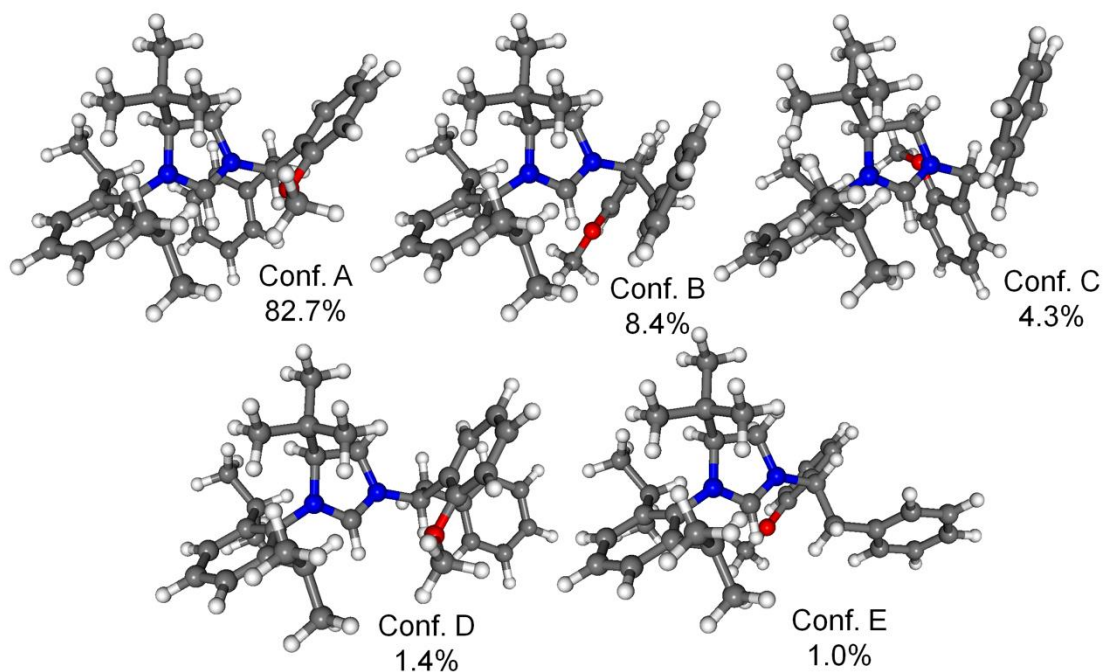

**Figure S212.** Structure and population of the low-energy  $\omega$ B97X/TZVP PCM (solvent: methanol) conformers ( $\geq 1\%$ ) of (5*S*,1'*S*)-**8a**.

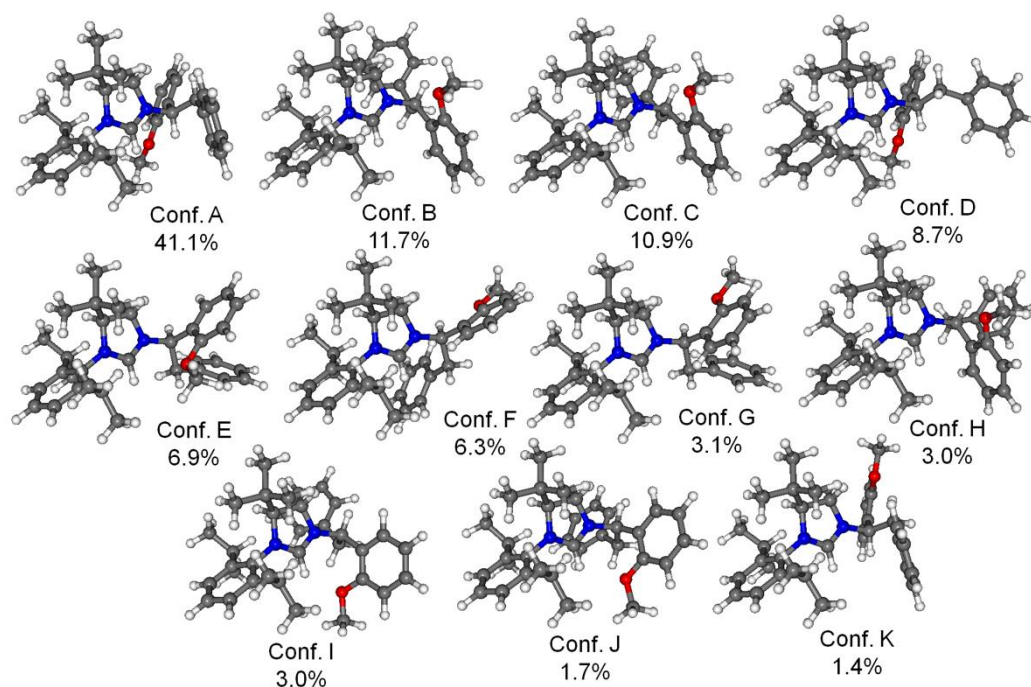

**Figure S213.** Structure and population of the low-energy B3LYP/TZVP PCM (solvent:  $\text{CHCl}_3$ ) conformers ( $\geq 1\%$ ) of  $(5S,1'R)$ -**8b**.

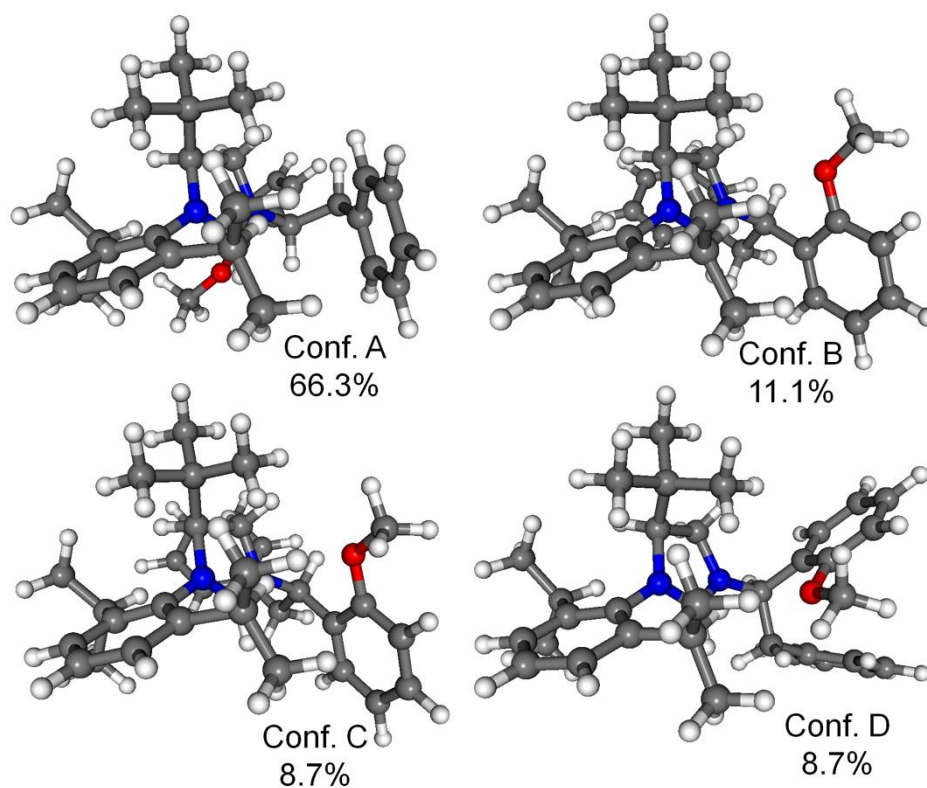

**Figure S214.** Structure and population of the low-energy  $\omega\text{B97X/TZVP}$  PCM (solvent: acetonitrile) conformers ( $\geq 1\%$ ) of  $(5S,1'R)$ -**8b**.



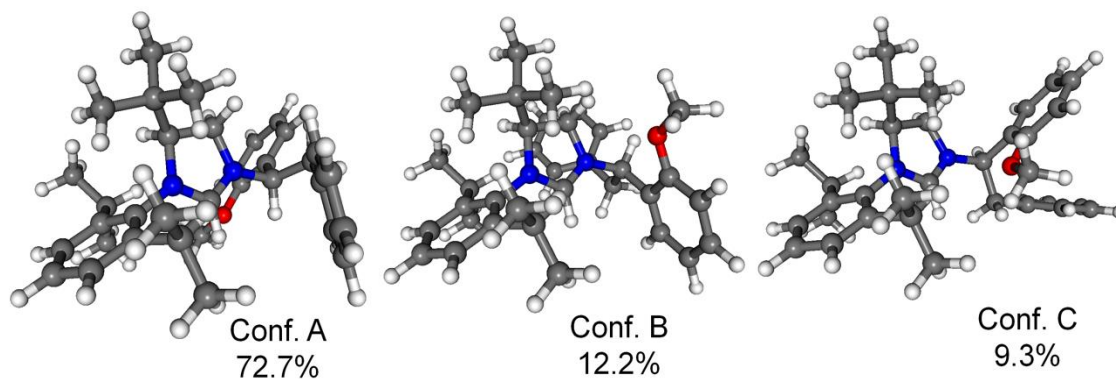

**Figure S215.** Structure and population of the low-energy  $\omega$ B97X/TZVP PCM (solvent: methanol) conformers ( $\geq 1\%$ ) of (5*S*,1'*R*)-**8b**.

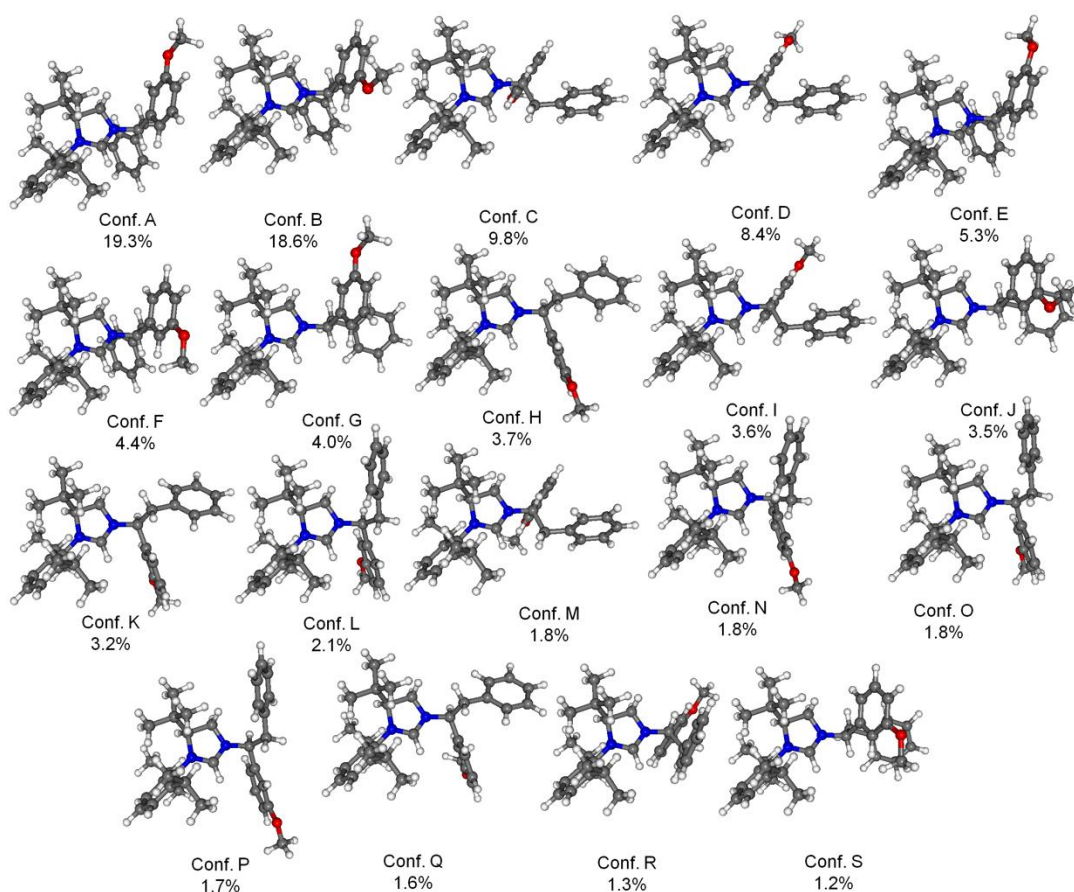

**Figure S216.** Structure and population of the low-energy B3LYP/TZVP PCM (solvent:  $\text{CHCl}_3$ ) conformers ( $\geq 1\%$ ) of (5*S*,1'*S*)-**9a**.

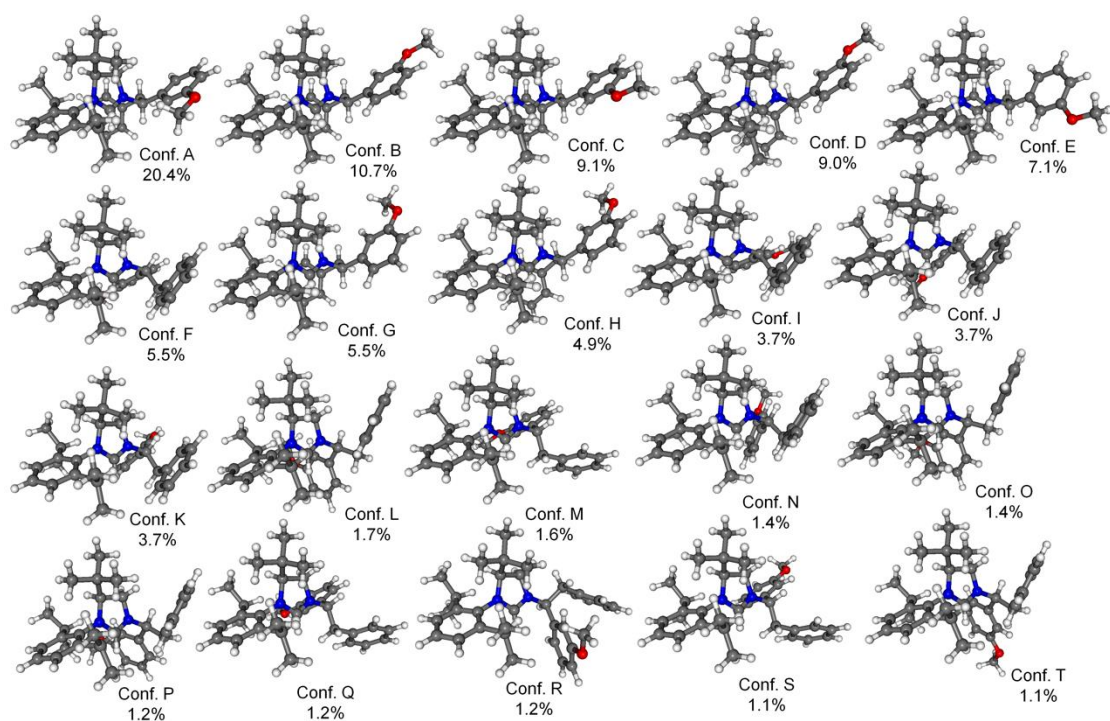

**Figure S217.** Structure and population of the low-energy  $\omega$ B97X/TZVP PCM (solvent: acetonitrile) conformers ( $\geq 1\%$ ) of (5*S*,1'*S*)-**9a**.

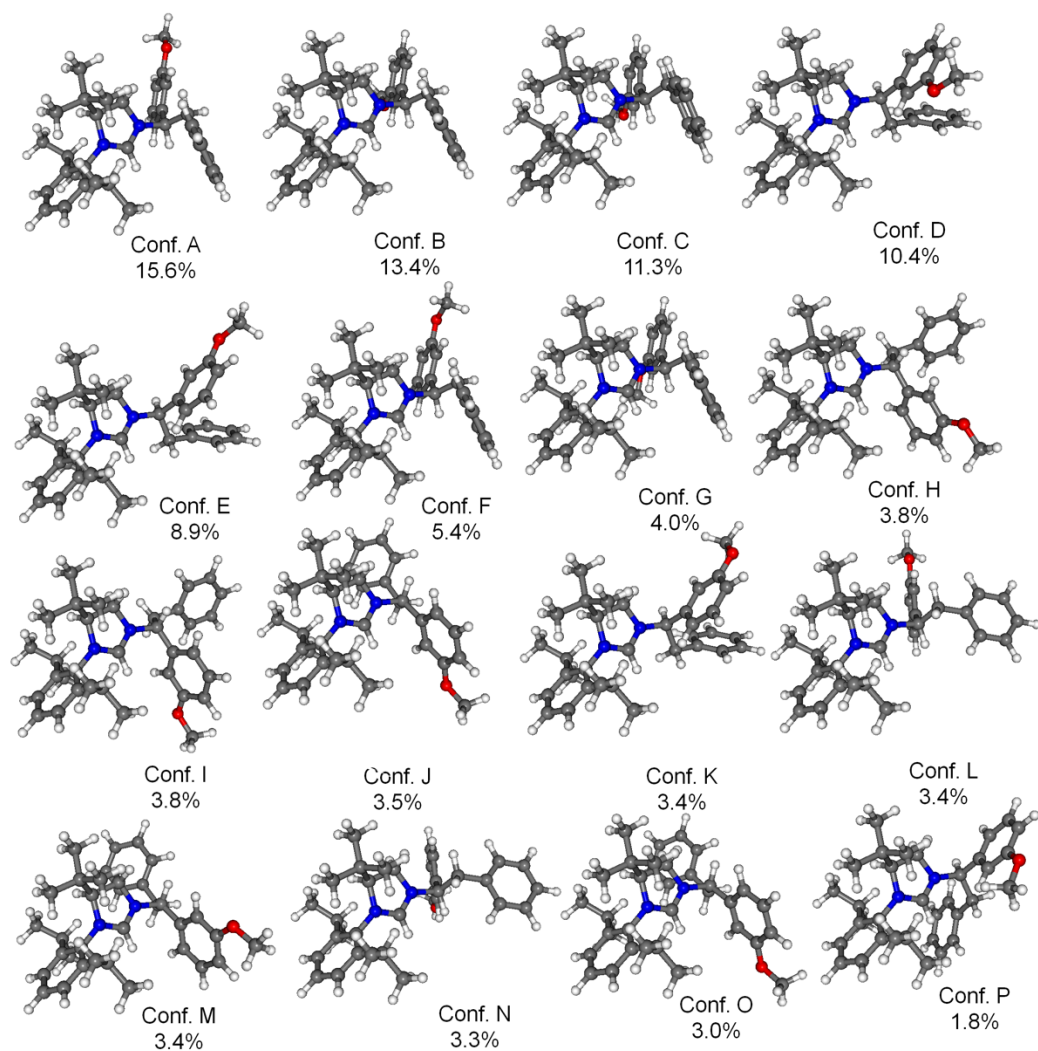

**Figure S218.** Structure and population of the low-energy B3LYP/TZVP PCM (solvent:  $\text{CHCl}_3$ ) conformers ( $\geq 1\%$ ) of  $(5S,1'R)$ -**9b**.

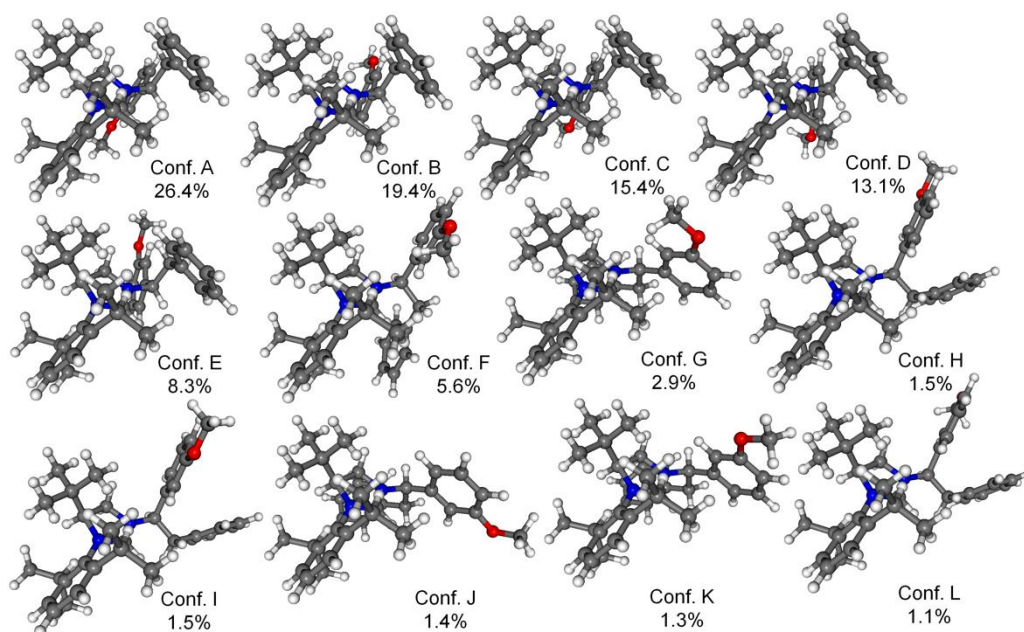

**Figure S219.** Structure and population of the low-energy  $\omega$ B97X/TZVP PCM (solvent: acetonitrile) conformers ( $\geq 1\%$ ) of (5*S*,1'*R*)-**9b**.

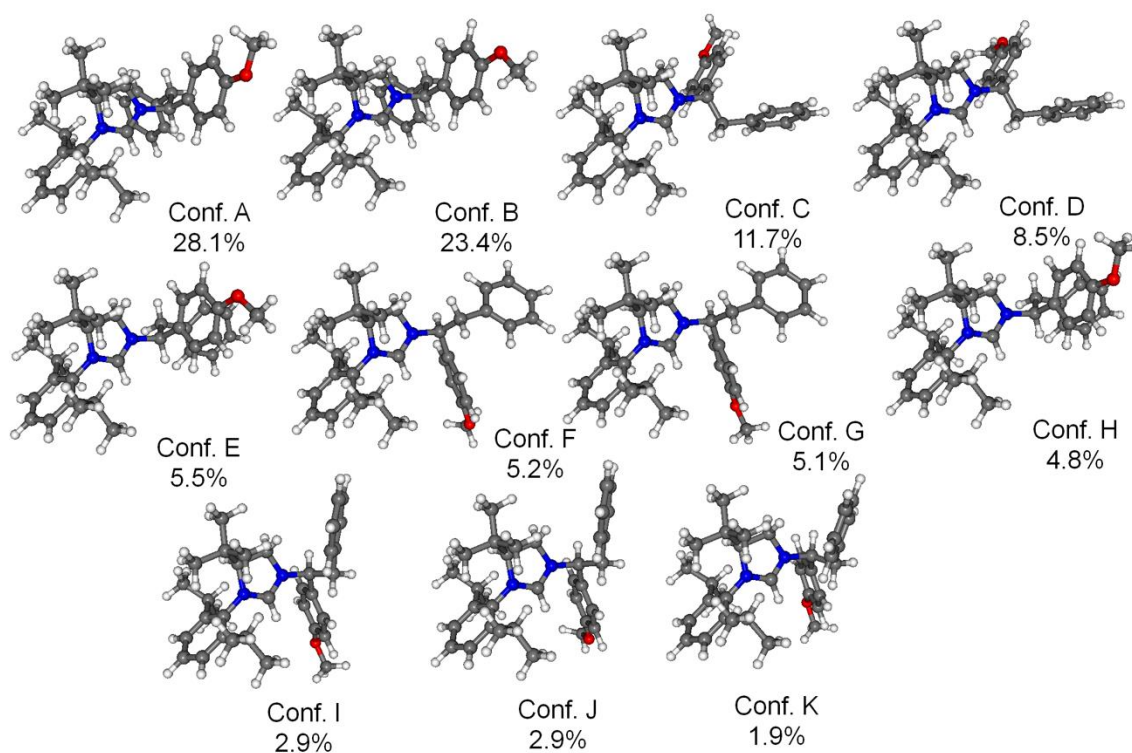

**Figure S220.** Structure and population of the low-energy B3LYP/TZVP PCM (solvent:  $\text{CHCl}_3$ ) conformers ( $\geq 1\%$ ) of (5*S*,1'*S*)-**10a**.



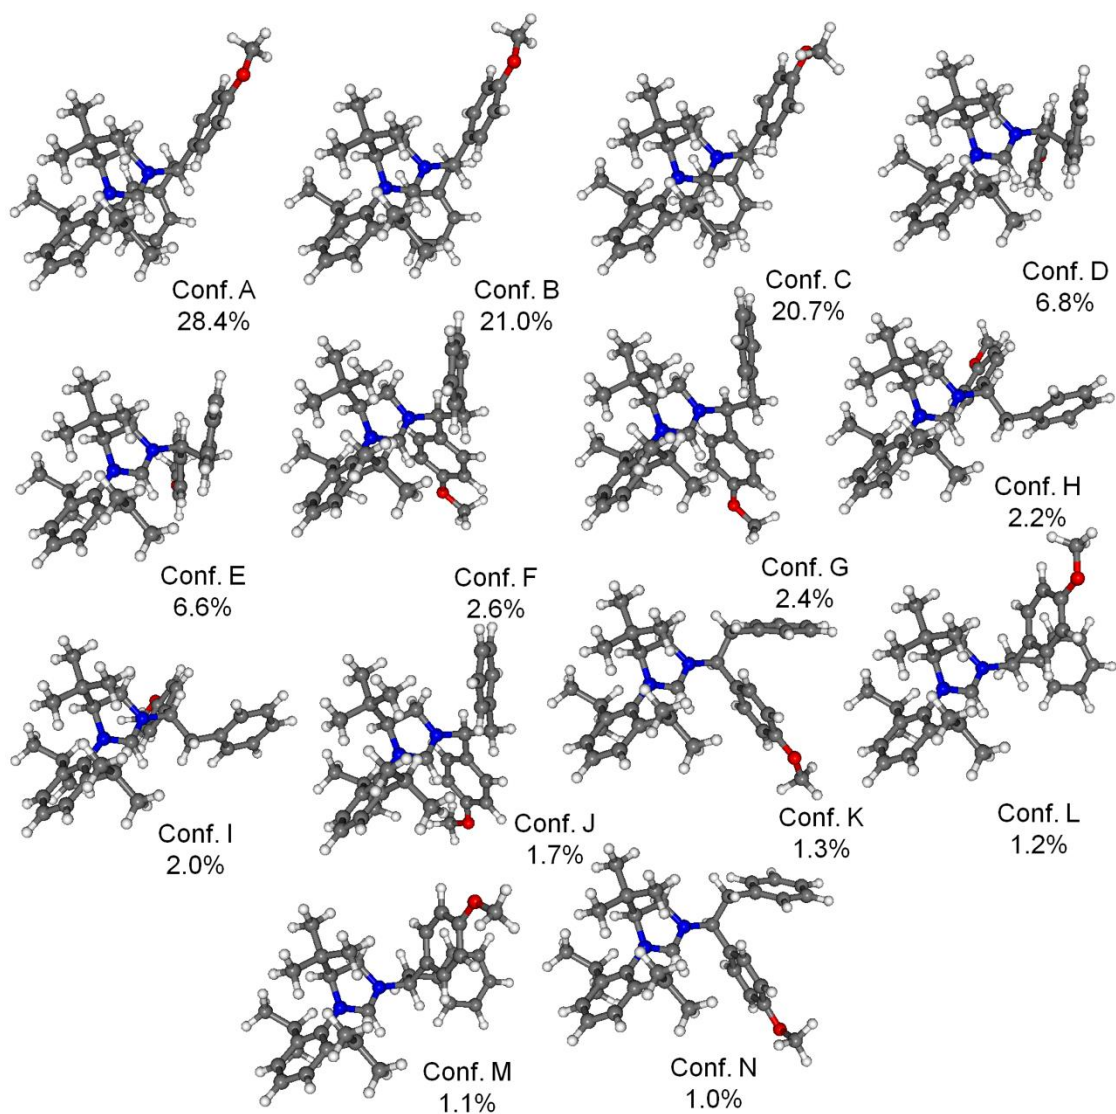

**Figure S221.** Structure and population of the low-energy  $\omega$ B97X/TZVP PCM (solvent: acetonitrile) conformers ( $\geq 1\%$ ) of (5*S*,1'*S*)-**10a**.



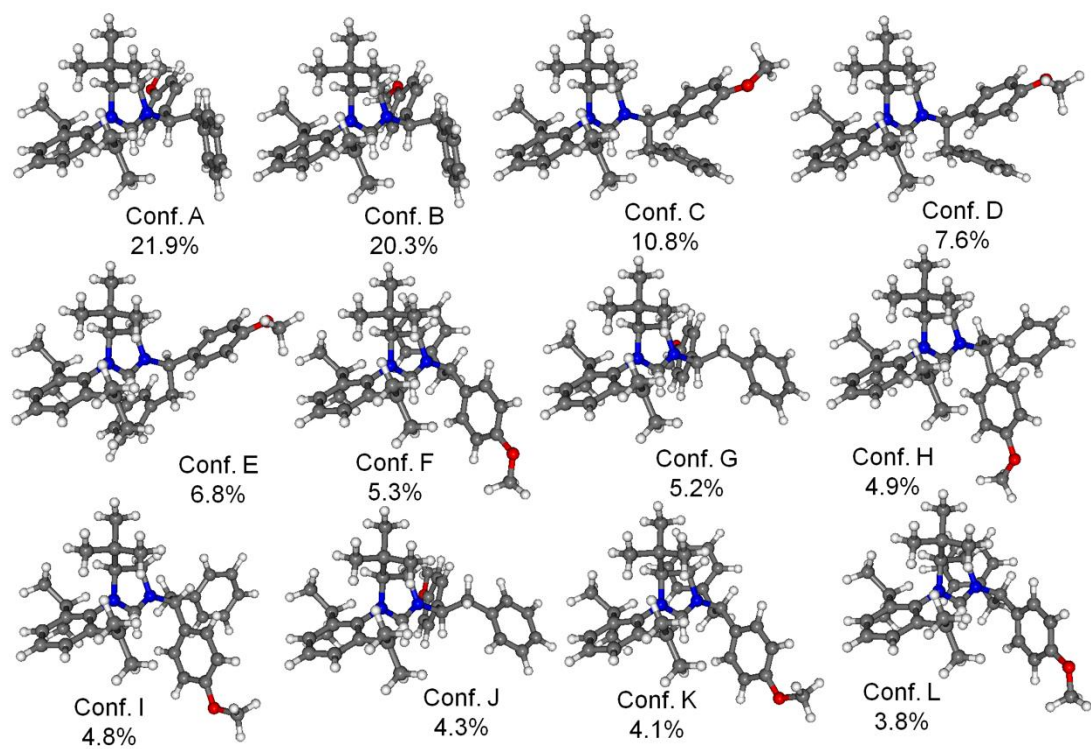

**Figure S222.** Structure and population of the low-energy B3LYP/TZVP PCM (solvent:  $\text{CHCl}_3$ ) conformers ( $\geq 1\%$ ) of (5*S*,1'*R*)-**10b**.



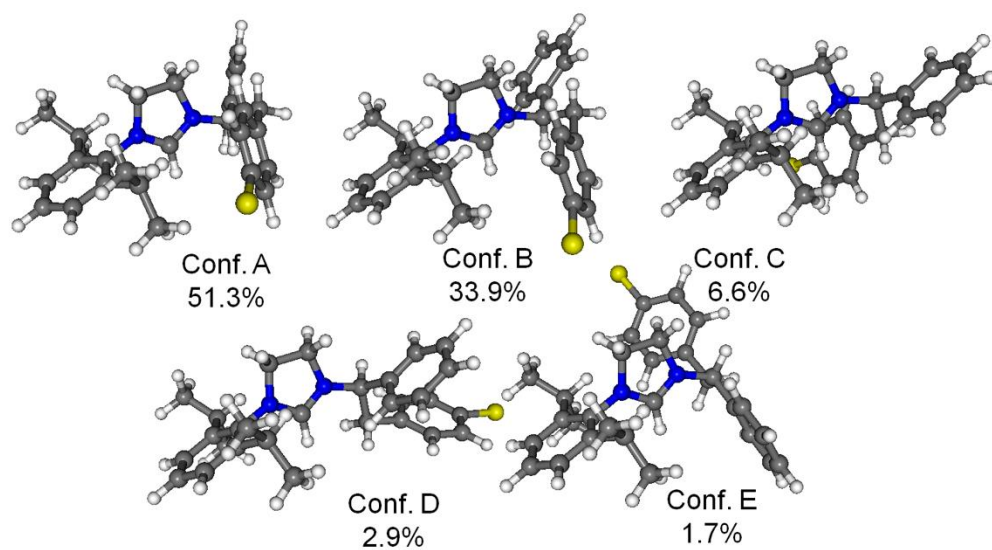

**Figure S225.** Structure and population of the low-energy  $\omega$ B97X/TZVP PCM (solvent: acetonitrile) conformers ( $\geq 1\%$ ) of (*R*)-**17a**.

## 8. Cartesian coordinates

**Table S9.** Cartesian coordinates and energies of the low-energy conformers of (5*S*,1'*S*)-**1a**, (5*S*,1'*R*)-**1b**, (5*S*,1'*S*)-**2a**, (5*S*,1'*R*)-**2b**, (5*S*,1'*R*)-**3a**, (5*S*,1'*R*)-**3b**, (5*S*,1'*S*)-**4a**, (5*S*,1'*R*)-**4b**, (5*R*,1'*R*)-**5a**, (5*R*,1'*S*)-**5b**, (5*S*,1'*S*)-**8a**, (5*S*,1'*R*)-**8b**, (5*S*,1'*S*)-**9a**, (5*S*,1'*R*)-**9b**, (5*S*,1'*S*)-**10a**, (5*S*,1'*R*)-**10b** and (*R*)-**17a**, calculated at the B3LYP/TZVP PCM (solvent: CHCl<sub>3</sub> or DMSO in case of (*R*)-**17a**.) level. Charge: +1.

|                                                 |           |           |           |                                                 |           |           |           |
|-------------------------------------------------|-----------|-----------|-----------|-------------------------------------------------|-----------|-----------|-----------|
| (5 <i>S</i> ,1' <i>S</i> )- <b>1a</b> , Conf. A |           |           |           | H                                               | -3.001476 | -0.853613 | 1.686083  |
|                                                 |           |           |           | H                                               | -2.321782 | 0.051475  | 3.038489  |
|                                                 |           |           |           | H                                               | -2.912179 | -1.590890 | 3.282269  |
| C                                               | -0.166200 | -0.529468 | 1.414755  | H                                               | 0.112370  | 2.004454  | 0.716059  |
| N                                               | -0.683318 | -0.204136 | 0.028641  | H                                               | -1.982678 | -1.980696 | -1.070816 |
| C                                               | 0.264949  | -0.434787 | -0.862960 | H                                               | -3.948892 | -3.396372 | -1.297084 |
| N                                               | 1.384320  | -0.899340 | -0.372629 | H                                               | -4.181886 | -2.333321 | 0.094619  |
| C                                               | 1.278457  | -1.009758 | 1.094371  | H                                               | -5.016682 | -2.002910 | -1.423506 |
| C                                               | -0.993056 | -1.516346 | 2.288819  | H                                               | -2.672831 | -2.595551 | -3.344601 |
| C                                               | -1.875963 | 0.558941  | -0.300893 | H                                               | -1.912063 | -0.999634 | -3.368896 |
| C                                               | 2.605895  | -1.315646 | -1.097082 | H                                               | -3.664967 | -1.141178 | -3.475366 |
| C                                               | -2.938465 | -0.077014 | -0.973153 | H                                               | 0.639867  | 4.280984  | 0.041087  |
| C                                               | -4.079033 | 0.682017  | -1.240781 | H                                               | -0.009687 | 3.386702  | -1.339947 |
| C                                               | -4.165082 | 2.013287  | -0.865155 | H                                               | -1.016579 | 4.562872  | -0.493913 |
| C                                               | -3.087112 | 2.629099  | -0.248865 | H                                               | -0.143564 | 3.764226  | 2.404124  |
| C                                               | -1.912199 | 1.928570  | 0.027370  | H                                               | -1.341888 | 2.498613  | 2.701421  |
| C                                               | -0.241215 | -1.633661 | 3.632585  | H                                               | -1.828452 | 4.016802  | 1.951110  |
| C                                               | -1.129223 | -2.913022 | 1.664567  | H                                               | 3.300314  | -1.713993 | -3.077675 |
| C                                               | -2.388447 | -0.938261 | 2.581365  | H                                               | 1.570351  | -1.999858 | -2.888372 |
| C                                               | -0.726015 | 2.691963  | 0.607698  | H                                               | 2.205236  | -0.341340 | -3.012660 |
| C                                               | -2.883610 | -1.516583 | -1.469592 | H                                               | 4.960509  | -2.134231 | -0.023024 |
| C                                               | -4.079065 | -2.356260 | -0.991218 | H                                               | 6.919098  | -0.772062 | 0.606645  |
| C                                               | -2.774338 | -1.562572 | -3.005092 | H                                               | 6.864710  | 1.689623  | 0.320036  |
| C                                               | -0.253366 | 3.794960  | -0.356970 | H                                               | 4.838587  | 2.775447  | -0.605994 |
| C                                               | -1.030475 | 3.273402  | 1.998213  | H                                               | 2.888294  | 1.421258  | -1.243015 |
| C                                               | 3.789383  | -0.455233 | -0.677685 | B3LYP energy = -1162.10128820 a.u.              |           |           |           |
| C                                               | 2.392038  | -1.337683 | -2.609303 | (5 <i>S</i> ,1' <i>S</i> )- <b>1a</b> , Conf. B |           |           |           |
| C                                               | 4.931530  | -1.058322 | -0.153175 | C                                               | 0.226919  | -0.877516 | 1.221233  |
| C                                               | 6.037619  | -0.290461 | 0.202289  | N                                               | 0.692730  | -0.195253 | -0.048983 |
| C                                               | 6.006951  | 1.090308  | 0.041804  | C                                               | -0.218010 | -0.358956 | -0.992322 |
| C                                               | 4.867498  | 1.700593  | -0.477782 | N                                               | -1.289957 | -1.010763 | -0.625025 |
| C                                               | 3.766196  | 0.932054  | -0.836917 | C                                               | -1.172989 | -1.405573 | 0.791235  |
| H                                               | -0.125842 | 0.409857  | 1.963411  | C                                               | 0.223643  | -0.052746 | 2.539914  |
| H                                               | 0.116798  | -0.238556 | -1.914348 | C                                               | 2.045893  | 0.240655  | -0.354064 |
| H                                               | 2.040984  | -0.390550 | 1.563477  | C                                               | -2.499665 | -1.226362 | -1.462303 |
| H                                               | 1.449032  | -2.045195 | 1.383487  | C                                               | 2.309380  | 1.615305  | -0.514645 |
| H                                               | 2.799993  | -2.338343 | -0.764576 | C                                               | 3.629608  | 1.993759  | -0.765546 |
| H                                               | -4.913301 | 0.222740  | -1.754598 | C                                               | 4.644498  | 1.054897  | -0.861247 |
| H                                               | -5.065687 | 2.577701  | -1.072663 | C                                               | 4.350185  | -0.295171 | -0.751691 |
| H                                               | -3.151123 | 3.679765  | 0.003158  | C                                               | 3.047090  | -0.736715 | -0.519208 |
| H                                               | -0.120748 | -0.657831 | 4.109187  | C                                               | 1.656701  | 0.360743  | 2.916147  |
| H                                               | 0.746917  | -2.084757 | 3.523618  | C                                               | -0.296739 | -1.005372 | 3.638628  |
| H                                               | -0.812883 | -2.266619 | 4.312851  | C                                               | -0.680125 | 1.187045  | 2.479027  |
| H                                               | -0.163337 | -3.386542 | 1.477511  | C                                               | 2.772168  | -2.237343 | -0.530602 |
| H                                               | -1.675010 | -3.563510 | 2.350063  |                                                 |           |           |           |
| H                                               | -1.682448 | -2.891341 | 0.726983  |                                                 |           |           |           |

|                                                 |           |           |           |   |           |           |           |
|-------------------------------------------------|-----------|-----------|-----------|---|-----------|-----------|-----------|
| C                                               | 1.232594  | 2.693446  | -0.485563 | N | 0.592814  | -0.319487 | -0.148705 |
| C                                               | 1.538923  | 3.809895  | 0.526309  | C | -0.720084 | -0.335882 | 0.008133  |
| C                                               | 1.012427  | 3.288399  | -1.889105 | N | -1.334801 | -1.339739 | -0.559929 |
| C                                               | 3.039147  | -2.828869 | -1.927280 | C | -0.355771 | -2.190443 | -1.262738 |
| C                                               | 3.569706  | -2.991139 | 0.546179  | C | 2.137866  | -2.420099 | -0.514212 |
| C                                               | -3.669398 | -0.409561 | -0.927214 | C | 1.383195  | 0.864632  | 0.151810  |
| C                                               | -2.771015 | -2.720673 | -1.627536 | C | -2.790716 | -1.658867 | -0.517726 |
| C                                               | -3.840867 | 0.901600  | -1.378423 | C | 1.800643  | 1.099513  | 1.476673  |
| C                                               | -4.884487 | 1.688246  | -0.904384 | C | 2.590618  | 2.225885  | 1.713982  |
| C                                               | -5.774443 | 1.171534  | 0.032864  | C | 2.948360  | 3.086285  | 0.688009  |
| C                                               | -5.615789 | -0.133813 | 0.486081  | C | 2.482430  | 2.861066  | -0.597714 |
| C                                               | -4.571726 | -0.920961 | 0.007673  | C | 1.672752  | 1.763826  | -0.893858 |
| H                                               | 0.898948  | -1.718270 | 1.386610  | C | 3.456342  | -1.643964 | -0.354513 |
| H                                               | -0.077544 | 0.008464  | -1.999292 | C | 2.345860  | -3.480469 | -1.617412 |
| H                                               | -1.251001 | -2.487259 | 0.882886  | C | 1.785573  | -3.124649 | 0.803586  |
| H                                               | -1.981750 | -0.948540 | 1.357542  | C | 1.097740  | 1.641085  | -2.301541 |
| H                                               | -2.230716 | -0.819176 | -2.437643 | C | 1.392612  | 0.229207  | 2.659565  |
| H                                               | 3.865625  | 3.042386  | -0.891097 | C | 2.598107  | -0.260770 | 3.478448  |
| H                                               | 5.662917  | 1.374535  | -1.043880 | C | 0.391797  | 0.968585  | 3.567261  |
| H                                               | 5.143668  | -1.021498 | -0.870529 | C | 0.177240  | 2.833100  | -2.622333 |
| H                                               | 2.087336  | 1.064138  | 2.206077  | C | 2.190726  | 1.488882  | -3.371661 |
| H                                               | 2.317582  | -0.506907 | 2.974829  | C | -3.602247 | -0.434311 | -0.130365 |
| H                                               | 1.652651  | 0.839353  | 3.897083  | C | -3.042654 | -2.899348 | 0.341974  |
| H                                               | 0.313443  | -1.909430 | 3.705433  | C | -3.924787 | -0.141738 | 1.196741  |
| H                                               | -0.251316 | -0.502196 | 4.605455  | C | -4.659087 | 0.999106  | 1.509895  |
| H                                               | -1.334215 | -1.304254 | 3.477152  | C | -5.083295 | 1.857793  | 0.501158  |
| H                                               | -1.718497 | 0.939559  | 2.250604  | C | -4.771936 | 1.571397  | -0.825000 |
| H                                               | -0.334668 | 1.909045  | 1.741237  | C | -4.036660 | 0.433270  | -1.136193 |
| H                                               | -0.676457 | 1.685075  | 3.450100  | H | 1.365982  | -1.051921 | -1.962684 |
| H                                               | 1.714794  | -2.402792 | -0.327694 | H | -1.248303 | 0.436632  | 0.546930  |
| H                                               | 0.294536  | 2.230169  | -0.182742 | H | -0.619086 | -2.252826 | -2.318204 |
| H                                               | 0.700823  | 4.508127  | 0.573695  | H | -0.373603 | -3.192913 | -0.841732 |
| H                                               | 1.706420  | 3.414610  | 1.529051  | H | -3.041487 | -1.903860 | -1.552080 |
| H                                               | 2.424678  | 4.379810  | 0.240184  | H | 2.929494  | 2.433844  | 2.720466  |
| H                                               | 0.207375  | 4.025865  | -1.862444 | H | 3.573195  | 3.946281  | 0.894893  |
| H                                               | 0.745958  | 2.522551  | -2.620601 | H | 2.732861  | 3.563578  | -1.382216 |
| H                                               | 1.912969  | 3.789191  | -2.249840 | H | 3.411011  | -0.903386 | 0.441471  |
| H                                               | 2.777238  | -3.889027 | -1.942047 | H | 3.730450  | -1.129130 | -1.277731 |
| H                                               | 2.448408  | -2.321467 | -2.692845 | H | 4.260987  | -2.341129 | -0.113740 |
| H                                               | 4.091266  | -2.740692 | -2.203788 | H | 2.606156  | -3.016951 | -2.572039 |
| H                                               | 3.298564  | -4.048833 | 0.543063  | H | 3.166153  | -4.141698 | -1.334802 |
| H                                               | 3.377377  | -2.594151 | 1.544732  | H | 1.463191  | -4.104414 | -1.769682 |
| H                                               | 4.644054  | -2.926085 | 0.364926  | H | 0.890855  | -3.744811 | 0.722415  |
| H                                               | -3.620548 | -2.859771 | -2.295845 | H | 1.634891  | -2.417743 | 1.617911  |
| H                                               | -1.903261 | -3.216115 | -2.063898 | H | 2.605122  | -3.785102 | 1.091631  |
| H                                               | -3.006345 | -3.209709 | -0.682579 | H | 0.468720  | 0.752739  | -2.346186 |
| H                                               | -3.159064 | 1.310437  | -2.115683 | H | 0.882372  | -0.652006 | 2.273345  |
| H                                               | -5.006355 | 2.699725  | -1.271170 | H | 2.264375  | -0.949301 | 4.257436  |
| H                                               | -6.590127 | 1.780371  | 0.402121  | H | 3.326336  | -0.782889 | 2.856369  |
| H                                               | -6.308907 | -0.545364 | 1.209099  | H | 3.111668  | 0.566825  | 3.970631  |
| H                                               | -4.477048 | -1.938312 | 0.364854  | H | 0.072440  | 0.317548  | 4.383952  |
| B3LYP energy = -1162.10036783 a.u.              |           |           |           | H | -0.497919 | 1.285398  | 3.019465  |
| (5 <i>S</i> ,1' <i>S</i> )- <b>1a</b> , Conf. C |           |           |           | H | 0.842993  | 1.860006  | 4.007448  |
| C                                               | 1.009728  | -1.479951 | -1.026530 | H | -0.287325 | 2.694099  | -3.600966 |
|                                                 |           |           |           | H | -0.616461 | 2.932796  | -1.879477 |
|                                                 |           |           |           | H | 0.732612  | 3.772272  | -2.648071 |

|   |           |           |           |
|---|-----------|-----------|-----------|
| H | 1.737874  | 1.364799  | -4.357448 |
| H | 2.827250  | 0.623295  | -3.179250 |
| H | 2.833262  | 2.370243  | -3.410521 |
| H | -4.105636 | -3.139078 | 0.323947  |
| H | -2.500960 | -3.761463 | -0.047479 |
| H | -2.740015 | -2.744543 | 1.377604  |
| H | -3.613822 | -0.801769 | 1.996165  |
| H | -4.904731 | 1.211210  | 2.542898  |
| H | -5.659328 | 2.741317  | 0.745928  |
| H | -5.107884 | 2.228857  | -1.616986 |
| H | -3.805898 | 0.210944  | -2.171805 |

B3LYP energy = -1162.10003349 a.u.

(5*S*,1'*S*)-**1a**, Conf. D

|   |           |           |           |
|---|-----------|-----------|-----------|
| C | 1.026283  | 1.771103  | 0.375914  |
| N | 0.602062  | 0.344511  | 0.107931  |
| C | -0.710736 | 0.244892  | 0.215298  |
| N | -1.331825 | 1.361812  | 0.495390  |
| C | -0.340182 | 2.433686  | 0.715715  |
| C | 1.833339  | 2.501687  | -0.736505 |
| C | 1.466050  | -0.822492 | 0.048599  |
| C | -2.784278 | 1.536978  | 0.786753  |
| C | 1.592077  | -1.532618 | -1.162205 |
| C | 2.467913  | -2.619348 | -1.184587 |
| C | 3.186435  | -2.992232 | -0.059871 |
| C | 3.005949  | -2.309413 | 1.132627  |
| C | 2.127993  | -1.228496 | 1.224654  |
| C | 2.132418  | 3.918345  | -0.200115 |
| C | 1.060582  | 2.614283  | -2.058483 |
| C | 3.180480  | 1.798061  | -0.974979 |
| C | 1.890743  | -0.599259 | 2.594130  |
| C | 0.792845  | -1.216107 | -2.420962 |
| C | 1.687422  | -1.007513 | -3.654327 |
| C | -0.253496 | -2.311716 | -2.697837 |
| C | 1.303968  | -1.628242 | 3.577833  |
| C | 3.163439  | 0.042096  | 3.172206  |
| C | -3.563051 | 0.274922  | 0.466191  |
| C | -3.323751 | 2.785141  | 0.085209  |
| C | -3.886320 | -0.072905 | -0.849079 |
| C | -4.611555 | -1.229243 | -1.114246 |
| C | -5.026775 | -2.050730 | -0.069126 |
| C | -4.711290 | -1.711922 | 1.242142  |
| C | -3.981987 | -0.555991 | 1.506349  |
| H | 1.658438  | 1.754651  | 1.261494  |
| H | -1.227838 | -0.694922 | 0.097184  |
| H | -0.396032 | 2.769629  | 1.752019  |
| H | -0.557430 | 3.276997  | 0.067480  |
| H | -2.843319 | 1.702191  | 1.866077  |
| H | 2.588095  | -3.183545 | -2.100100 |
| H | 3.870579  | -3.830383 | -0.106733 |
| H | 3.539884  | -2.636451 | 2.015563  |
| H | 2.665607  | 3.881194  | 0.752892  |
| H | 1.229335  | 4.516099  | -0.062832 |
| H | 2.765427  | 4.448542  | -0.913201 |
| H | 0.109728  | 3.138661  | -1.944740 |

|   |           |           |           |
|---|-----------|-----------|-----------|
| H | 1.652351  | 3.180747  | -2.779525 |
| H | 0.858721  | 1.638753  | -2.498053 |
| H | 3.062784  | 0.797341  | -1.385436 |
| H | 3.757300  | 1.716540  | -0.051130 |
| H | 3.773495  | 2.379378  | -1.683318 |
| H | 1.141523  | 0.185758  | 2.494427  |
| H | 0.248631  | -0.287390 | -2.256241 |
| H | 1.078956  | -0.701514 | -4.507824 |
| H | 2.441659  | -0.237807 | -3.484691 |
| H | 2.205183  | -1.926678 | -3.933782 |
| H | -0.855849 | -2.044733 | -3.568841 |
| H | -0.928456 | -2.455238 | -1.851689 |
| H | 0.226434  | -3.270412 | -2.904161 |
| H | 1.066577  | -1.143814 | 4.527336  |
| H | 0.389328  | -2.077198 | 3.185926  |
| H | 2.010572  | -2.433933 | 3.783382  |
| H | 2.944711  | 0.514220  | 4.132219  |
| H | 3.575444  | 0.803016  | 2.506467  |
| H | 3.941271  | -0.705029 | 3.340458  |
| H | -4.382974 | 2.887347  | 0.319329  |
| H | -2.819963 | 3.687354  | 0.432225  |
| H | -3.216171 | 2.720924  | -0.997684 |
| H | -3.576694 | 0.557546  | -1.673507 |
| H | -4.858625 | -1.485258 | -2.136893 |
| H | -5.596661 | -2.947595 | -0.277021 |
| H | -5.035404 | -2.342463 | 2.060485  |
| H | -3.745361 | -0.294582 | 2.531398  |

B3LYP energy = -1162.09977901 a.u.

(5*S*,1'*R*)-**1b**, Conf. A

|   |           |           |           |
|---|-----------|-----------|-----------|
| C | 0.214935  | -0.848585 | 1.266013  |
| N | 0.691077  | -0.218772 | -0.027367 |
| C | -0.224546 | -0.392801 | -0.965558 |
| N | -1.314458 | -0.996963 | -0.569732 |
| C | -1.201404 | -1.344481 | 0.858864  |
| C | 0.244462  | 0.012376  | 2.561272  |
| C | 2.052319  | 0.178975  | -0.349610 |
| C | -2.539632 | -1.295460 | -1.343533 |
| C | 2.342581  | 1.541950  | -0.558306 |
| C | 3.669109  | 1.886224  | -0.824439 |
| C | 4.666069  | 0.925770  | -0.887689 |
| C | 4.346420  | -0.413504 | -0.728784 |
| C | 3.035531  | -0.822076 | -0.480210 |
| C | -0.301696 | -0.892974 | 3.687301  |
| C | -0.620181 | 1.278219  | 2.469803  |
| C | 1.690882  | 0.391937  | 2.922212  |
| C | 2.736408  | -2.316903 | -0.423596 |
| C | 1.288539  | 2.642819  | -0.560055 |
| C | 1.623676  | 3.782324  | 0.416777  |
| C | 1.076605  | 3.201852  | -1.979377 |
| C | 3.087034  | -3.002980 | -1.756840 |
| C | 3.450374  | -3.011296 | 0.748347  |
| C | -3.732456 | -0.535911 | -0.778482 |
| C | -2.339302 | -1.057751 | -2.838701 |

|   |           |           |           |
|---|-----------|-----------|-----------|
| C | -3.726731 | 0.857992  | -0.693348 |
| C | -4.838098 | 1.539230  | -0.210404 |
| C | -5.970301 | 0.834153  | 0.191323  |
| C | -5.982965 | -0.553964 | 0.111360  |
| C | -4.866993 | -1.235086 | -0.368244 |
| H | 0.862465  | -1.704297 | 1.451072  |
| H | -0.065127 | -0.070060 | -1.983221 |
| H | -1.320818 | -2.420471 | 0.980069  |
| H | -1.994574 | -0.844798 | 1.410690  |
| H | -2.716491 | -2.362400 | -1.187707 |
| H | 3.924471  | 2.925152  | -0.986908 |
| H | 5.690069  | 1.219205  | -1.082609 |
| H | 5.126343  | -1.158237 | -0.820996 |
| H | 0.278523  | -1.814764 | 3.775915  |
| H | -1.348977 | -1.161955 | 3.537333  |
| H | -0.235427 | -0.366066 | 4.640191  |
| H | -0.252043 | 1.971018  | 1.715145  |
| H | -1.665776 | 1.057767  | 2.246882  |
| H | -0.600402 | 1.799292  | 3.428473  |
| H | 1.703416  | 0.904570  | 3.885779  |
| H | 2.143363  | 1.055922  | 2.187970  |
| H | 2.323917  | -0.493610 | 3.011955  |
| H | 1.664305  | -2.453451 | -0.284308 |
| H | 0.341949  | 2.208738  | -0.240583 |
| H | 2.522756  | 4.320350  | 0.111357  |
| H | 0.803361  | 4.502447  | 0.443557  |
| H | 1.783855  | 3.414404  | 1.431048  |
| H | 0.288572  | 3.957889  | -1.971870 |
| H | 0.790969  | 2.422513  | -2.688873 |
| H | 1.986743  | 3.672113  | -2.356678 |
| H | 4.159555  | -2.968051 | -1.955077 |
| H | 2.789355  | -4.053227 | -1.725234 |
| H | 2.575863  | -2.529286 | -2.597343 |
| H | 3.173371  | -4.066831 | 0.786418  |
| H | 3.193417  | -2.558214 | 1.707695  |
| H | 4.534982  | -2.957163 | 0.637593  |
| H | -1.506716 | -1.645436 | -3.228873 |
| H | -3.243940 | -1.369540 | -3.358701 |
| H | -2.177905 | -0.003595 | -3.068729 |
| H | -2.853978 | 1.420824  | -1.003241 |
| H | -4.822253 | 2.620293  | -0.149945 |
| H | -6.836195 | 1.365570  | 0.565701  |
| H | -6.858435 | -1.109107 | 0.424114  |
| H | -4.882733 | -2.317653 | -0.424934 |

B3LYP energy = -1162.10129004 a.u.

(5*S*,1'*R*)-**1b**, Conf. B

|   |           |           |           |
|---|-----------|-----------|-----------|
| C | -0.115700 | -0.470016 | 1.339543  |
| N | -0.689918 | -0.161287 | -0.027585 |
| C | 0.238222  | -0.358629 | -0.947125 |
| N | 1.389470  | -0.780036 | -0.494882 |
| C | 1.340058  | -0.888277 | 0.975361  |
| C | -0.875109 | -1.496705 | 2.228441  |
| C | -1.919875 | 0.559768  | -0.311450 |
| C | 2.576750  | -1.110775 | -1.325356 |

|   |           |           |           |
|---|-----------|-----------|-----------|
| C | -2.978841 | -0.108747 | -0.957282 |
| C | -4.158663 | 0.606081  | -1.170553 |
| C | -4.286410 | 1.925511  | -0.766197 |
| C | -3.212591 | 2.575904  | -0.178809 |
| C | -1.999665 | 1.921689  | 0.040646  |
| C | -0.075178 | -1.602101 | 3.544962  |
| C | -0.981717 | -2.888315 | 1.587964  |
| C | -2.280670 | -0.974979 | 2.573762  |
| C | -0.824914 | 2.724544  | 0.590190  |
| C | -2.881351 | -1.535533 | -1.482999 |
| C | -4.017522 | -2.436993 | -0.973253 |
| C | -2.832044 | -1.547435 | -3.022281 |
| C | -0.459905 | 3.887927  | -0.350098 |
| C | -1.087521 | 3.241193  | 2.014862  |
| C | 3.771976  | -0.283685 | -0.868810 |
| C | 2.797270  | -2.622507 | -1.371354 |
| C | 4.754053  | -0.794503 | -0.019806 |
| C | 5.821418  | 0.002838  | 0.386211  |
| C | 5.920849  | 1.317976  | -0.053891 |
| C | 4.948120  | 1.835381  | -0.905486 |
| C | 3.883337  | 1.038314  | -1.308630 |
| H | -0.098101 | 0.467041  | 1.893219  |
| H | 0.059805  | -0.169432 | -1.996714 |
| H | 2.087021  | -0.229354 | 1.413906  |
| H | 1.562093  | -1.909739 | 1.274616  |
| H | 2.310695  | -0.775521 | -2.328889 |
| H | -4.990898 | 0.120997  | -1.663522 |
| H | -5.216929 | 2.454795  | -0.929591 |
| H | -3.311062 | 3.618503  | 0.094688  |
| H | 0.031948  | -0.626446 | 4.025246  |
| H | 0.921818  | -2.022030 | 3.398916  |
| H | -0.603837 | -2.257574 | 4.238633  |
| H | -1.571607 | -2.873387 | 0.672979  |
| H | -0.006643 | -3.321409 | 1.356293  |
| H | -1.475739 | -3.569528 | 2.282889  |
| H | -2.757476 | -1.656388 | 3.280644  |
| H | -2.924659 | -0.900774 | 1.699545  |
| H | -2.235956 | 0.009614  | 3.044220  |
| H | 0.051698  | 2.078107  | 0.627614  |
| H | -1.944878 | -1.965228 | -1.129973 |
| H | -4.988123 | -2.115441 | -1.354600 |
| H | -3.856940 | -3.463524 | -1.309137 |
| H | -4.071872 | -2.442887 | 0.116388  |
| H | -2.694270 | -2.567318 | -3.387586 |
| H | -2.013465 | -0.935326 | -3.407007 |
| H | -3.760001 | -1.161166 | -3.448533 |
| H | -1.264846 | 4.622181  | -0.411159 |
| H | 0.430108  | 4.400868  | 0.020315  |
| H | -0.252313 | 3.533500  | -1.361569 |
| H | -1.917763 | 3.949789  | 2.029880  |
| H | -0.204444 | 3.756698  | 2.398005  |
| H | -1.333542 | 2.431013  | 2.703806  |
| H | 1.917348  | -3.116398 | -1.784388 |
| H | 3.649667  | -2.845988 | -2.012903 |
| H | 2.996706  | -3.046532 | -0.387365 |
| H | 4.702997  | -1.818338 | 0.326458  |

|   |          |           |           |
|---|----------|-----------|-----------|
| H | 6.577814 | -0.408777 | 1.042685  |
| H | 6.753890 | 1.934942  | 0.258784  |
| H | 5.023071 | 2.855245  | -1.261501 |
| H | 3.135553 | 1.446915  | -1.979389 |

B3LYP energy = -1162.10028630 a.u.

(5*S*,1'*R*)-**1b**, Conf. C

|   |           |           |           |
|---|-----------|-----------|-----------|
| C | 1.022744  | -1.801431 | 0.122831  |
| N | 0.594696  | -0.352111 | 0.048676  |
| C | -0.721626 | -0.285008 | -0.049475 |
| N | -1.340444 | -1.437632 | -0.034583 |
| C | -0.353465 | -2.526694 | 0.106912  |
| C | 1.959374  | -2.229116 | 1.288507  |
| C | 1.447047  | 0.783866  | -0.265302 |
| C | -2.808119 | -1.682701 | 0.062349  |
| C | 1.675029  | 1.770412  | 0.714199  |
| C | 2.542498  | 2.814193  | 0.387140  |
| C | 3.150929  | 2.886502  | -0.856019 |
| C | 2.865760  | 1.934025  | -1.821544 |
| C | 1.993042  | 0.876774  | -1.560848 |
| C | 2.211331  | -3.741624 | 1.105145  |
| C | 1.346493  | -1.983250 | 2.674262  |
| C | 3.315816  | -1.510899 | 1.183381  |
| C | 1.627493  | -0.065072 | -2.704187 |
| C | 0.985410  | 1.791886  | 2.072999  |
| C | 1.977818  | 1.902436  | 3.242155  |
| C | -0.051040 | 2.930076  | 2.140996  |
| C | 0.895816  | 0.697281  | -3.824726 |
| C | 2.847195  | -0.817098 | -3.260571 |
| C | -3.594593 | -0.388438 | -0.021083 |
| C | -3.236485 | -2.729110 | -0.969202 |
| C | -4.150597 | 0.151821  | 1.139726  |
| C | -4.891158 | 1.329389  | 1.091439  |
| C | -5.079523 | 1.983209  | -0.121422 |
| C | -4.528717 | 1.452575  | -1.285156 |
| C | -3.794679 | 0.272464  | -1.236803 |
| H | 1.558035  | -2.017355 | -0.800872 |
| H | -1.243516 | 0.654106  | -0.152944 |
| H | -0.440959 | -3.222041 | -0.724690 |
| H | -0.553559 | -3.066885 | 1.031796  |
| H | -2.962107 | -2.102949 | 1.060115  |
| H | 2.743129  | 3.585512  | 1.119037  |
| H | 3.830194  | 3.699535  | -1.080301 |
| H | 3.311555  | 2.024753  | -2.803624 |
| H | 2.634320  | -3.960115 | 0.121511  |
| H | 1.302997  | -4.335089 | 1.225479  |
| H | 2.924242  | -4.084132 | 1.856473  |
| H | 0.393593  | -2.498433 | 2.809518  |
| H | 2.024147  | -2.360100 | 3.442182  |
| H | 1.190493  | -0.923794 | 2.869720  |
| H | 3.784400  | -1.684429 | 0.212279  |
| H | 3.991072  | -1.896936 | 1.949190  |
| H | 3.231446  | -0.435628 | 1.327984  |
| H | 0.923431  | -0.810303 | -2.335284 |
| H | 0.443028  | 0.855057  | 2.195217  |

|   |           |           |           |
|---|-----------|-----------|-----------|
| H | 2.726299  | 1.109305  | 3.215735  |
| H | 2.503964  | 2.858589  | 3.233479  |
| H | 1.443312  | 1.830984  | 4.191639  |
| H | -0.584104 | 2.897372  | 3.093573  |
| H | -0.787800 | 2.860603  | 1.338214  |
| H | 0.432375  | 3.905825  | 2.061232  |
| H | 0.573471  | 0.001654  | -4.602427 |
| H | 0.013382  | 1.214159  | -3.441977 |
| H | 1.544064  | 1.441133  | -4.291013 |
| H | 2.535813  | -1.512315 | -4.042933 |
| H | 3.360470  | -1.387712 | -2.484433 |
| H | 3.571905  | -0.128666 | -3.699238 |
| H | -2.731758 | -3.681197 | -0.805432 |
| H | -4.308092 | -2.900196 | -0.872143 |
| H | -3.031340 | -2.398740 | -1.987605 |
| H | -4.011726 | -0.355492 | 2.087463  |
| H | -5.321978 | 1.731549  | 1.999742  |
| H | -5.656169 | 2.898711  | -0.162121 |
| H | -4.677311 | 1.953714  | -2.233425 |
| H | -3.383234 | -0.130651 | -2.154000 |

B3LYP energy = -1162.10019331 a.u.

(5*S*,1'*S*)-**2a**, Conf. A

|   |           |           |           |
|---|-----------|-----------|-----------|
| C | 1.501625  | -0.575375 | -1.666057 |
| N | 1.123564  | -0.188236 | -0.251575 |
| C | -0.080487 | -0.655537 | 0.028026  |
| N | -0.644558 | -1.342778 | -0.930766 |
| C | 0.245231  | -1.382302 | -2.106146 |
| C | 2.849881  | -1.320214 | -1.886068 |
| C | 1.766786  | 0.823111  | 0.571873  |
| C | -1.929565 | -2.094043 | -0.863845 |
| C | 1.674515  | 2.172673  | 0.178136  |
| C | 2.352840  | 3.118951  | 0.947576  |
| C | 3.053056  | 2.753881  | 2.086575  |
| C | 3.068277  | 1.429093  | 2.493169  |
| C | 2.428067  | 0.433372  | 1.753350  |
| C | 4.033408  | -0.430677 | -1.468437 |
| C | 2.961624  | -1.566804 | -3.406670 |
| C | 2.924549  | -2.665557 | -1.149342 |
| C | 2.433531  | -0.993139 | 2.289708  |
| C | 0.826834  | 2.658941  | -0.992992 |
| C | -0.313124 | 3.570202  | -0.502478 |
| C | 1.666477  | 3.366427  | -2.069460 |
| C | 3.851187  | -1.514524 | 2.575936  |
| C | 1.552495  | -1.107191 | 3.547770  |
| C | -2.875915 | -1.452156 | 0.140389  |
| C | -1.651881 | -3.583947 | -0.650170 |
| C | -3.571812 | -0.244278 | -0.199572 |
| C | -4.459028 | 0.333009  | 0.765386  |
| C | -4.629334 | -0.296257 | 2.023759  |
| C | -3.957096 | -1.449880 | 2.322255  |
| C | -3.082962 | -2.024214 | 1.375185  |
| C | -3.432779 | 0.417184  | -1.447976 |
| C | -4.128486 | 1.567865  | -1.728024 |



|   |           |           |           |
|---|-----------|-----------|-----------|
| C | -5.000690 | 2.130438  | -0.773842 |
| C | -5.160012 | 1.522719  | 0.444618  |
| H | 1.561255  | 0.349230  | -2.238010 |
| H | -0.570935 | -0.465778 | 0.971767  |
| H | -0.259823 | -0.935506 | -2.962060 |
| H | 0.483478  | -2.414867 | -2.350106 |
| H | -2.360851 | -1.983185 | -1.860078 |
| H | 2.313037  | 4.162200  | 0.662187  |
| H | 3.568884  | 3.506127  | 2.670328  |
| H | 3.586752  | 1.161021  | 3.404239  |
| H | 4.969902  | -0.925286 | -1.732593 |
| H | 4.052178  | -0.236680 | -0.397874 |
| H | 4.011300  | 0.530686  | -1.986058 |
| H | 2.906302  | -0.630378 | -3.966857 |
| H | 3.924558  | -2.029049 | -3.628412 |
| H | 2.186251  | -2.236618 | -3.783593 |
| H | 2.132449  | -3.353623 | -1.450974 |
| H | 2.874436  | -2.543975 | -0.068423 |
| H | 3.873596  | -3.152978 | -1.379106 |
| H | 1.996603  | -1.643950 | 1.533600  |
| H | 0.348649  | 1.798582  | -1.461046 |
| H | -0.949489 | 3.857876  | -1.341893 |
| H | -0.935741 | 3.065001  | 0.237922  |
| H | 0.073403  | 4.484219  | -0.048428 |
| H | 1.035983  | 3.643944  | -2.916761 |
| H | 2.472333  | 2.730149  | -2.439625 |
| H | 2.119595  | 4.280698  | -1.681636 |
| H | 3.809196  | -2.564812 | 2.871799  |
| H | 4.496178  | -1.435380 | 1.699681  |
| H | 4.325146  | -0.964001 | 3.390293  |
| H | 1.514916  | -2.143597 | 3.889977  |
| H | 0.529743  | -0.775220 | 3.357592  |
| H | 1.950234  | -0.499435 | 4.363032  |
| H | -2.590484 | -4.137564 | -0.657459 |
| H | -1.030316 | -3.974757 | -1.455872 |
| H | -1.140210 | -3.773032 | 0.293124  |
| H | -5.304750 | 0.150507  | 2.743646  |
| H | -4.093018 | -1.933538 | 3.281073  |
| H | -2.577942 | -2.942920 | 1.639413  |
| H | -2.776900 | 0.013500  | -2.206763 |
| H | -4.009285 | 2.047084  | -2.691823 |
| H | -5.543145 | 3.037523  | -1.008391 |
| H | -5.829776 | 1.944257  | 1.184784  |

B3LYP energy = -1315.78590055 a.u.

(5S,1'S)-2a, Conf. B

|   |           |           |           |
|---|-----------|-----------|-----------|
| C | -0.940397 | -0.293196 | 1.502279  |
| N | -1.424225 | -0.178395 | 0.072363  |
| C | -0.408913 | -0.353904 | -0.754590 |
| N | 0.739471  | -0.598180 | -0.178420 |
| C | 0.573661  | -0.583277 | 1.288657  |
| C | -1.661733 | -1.307911 | 2.436395  |
| C | -2.691632 | 0.375238  | -0.377183 |
| C | 2.030983  | -0.923973 | -0.815315 |
| C | -2.930327 | 1.750794  | -0.187173 |

|   |           |           |           |
|---|-----------|-----------|-----------|
| C | -4.175455 | 2.250095  | -0.571682 |
| C | -5.127579 | 1.434696  | -1.162943 |
| C | -4.841020 | 0.100443  | -1.404639 |
| C | -3.622082 | -0.462718 | -1.023214 |
| C | -3.139711 | -0.921050 | 2.616461  |
| C | -0.970978 | -1.190606 | 3.812646  |
| C | -1.562845 | -2.759085 | 1.943956  |
| C | -3.345399 | -1.918934 | -1.378166 |
| C | -1.887178 | 2.728770  | 0.344670  |
| C | -1.504206 | 3.759758  | -0.733016 |
| C | -2.343724 | 3.428299  | 1.635199  |
| C | -4.443769 | -2.872118 | -0.879969 |
| C | -3.140873 | -2.080630 | -2.896543 |
| C | 3.078605  | 0.142809  | -0.507587 |
| C | 1.878655  | -1.162664 | -2.318684 |
| C | 4.449743  | -0.224303 | -0.322529 |
| C | 5.410047  | 0.814766  | -0.090627 |
| C | 4.985964  | 2.165651  | -0.052501 |
| C | 3.668103  | 2.487479  | -0.236520 |
| C | 2.719342  | 1.470062  | -0.464343 |
| C | 4.922331  | -1.563653 | -0.365391 |
| C | 6.251328  | -1.857643 | -0.185455 |
| C | 7.189862  | -0.831160 | 0.047713  |
| C | 6.774045  | 0.473992  | 0.093923  |
| H | -1.064222 | 0.689098  | 1.955268  |
| H | -0.530473 | -0.284544 | -1.824806 |
| H | 1.212601  | 0.184594  | 1.720846  |
| H | 0.875918  | -1.549671 | 1.688346  |
| H | 2.331994  | -1.862770 | -0.348920 |
| H | -4.394069 | 3.300221  | -0.426738 |
| H | -6.086012 | 1.844989  | -1.455770 |
| H | -5.577455 | -0.517303 | -1.901636 |
| H | -3.599531 | -1.578492 | 3.356498  |
| H | -3.708557 | -1.013193 | 1.693272  |
| H | -3.243685 | 0.104817  | 2.976052  |
| H | -1.020997 | -0.169567 | 4.198233  |
| H | -1.476564 | -1.840637 | 4.528120  |
| H | 0.077451  | -1.493000 | 3.784197  |
| H | -0.530871 | -3.103459 | 1.850659  |
| H | -2.056138 | -2.899593 | 0.983526  |
| H | -2.053747 | -3.418808 | 2.661448  |
| H | -2.416169 | -2.218699 | -0.895369 |
| H | -0.975003 | 2.180513  | 0.577892  |
| H | -0.706780 | 4.408543  | -0.364455 |
| H | -1.152809 | 3.272347  | -1.644731 |
| H | -2.352003 | 4.393592  | -0.999022 |
| H | -1.549915 | 4.075206  | 2.014278  |
| H | -2.597320 | 2.708873  | 2.415784  |
| H | -3.222838 | 4.051011  | 1.460422  |
| H | -4.157876 | -3.906314 | -1.081945 |
| H | -4.611534 | -2.771291 | 0.193258  |
| H | -5.393699 | -2.690912 | -1.385587 |
| H | -2.887416 | -3.115724 | -3.135039 |
| H | -2.338624 | -1.440055 | -3.269918 |
| H | -4.049248 | -1.823036 | -3.444792 |
| H | 2.847043  | -1.451926 | -2.723647 |

|   |          |           |           |
|---|----------|-----------|-----------|
| H | 1.172022 | -1.967714 | -2.528104 |
| H | 1.566560 | -0.256583 | -2.840539 |
| H | 5.723500 | 2.939752  | 0.122347  |
| H | 3.345959 | 3.520706  | -0.209733 |
| H | 1.683541 | 1.753367  | -0.606823 |
| H | 4.237237 | -2.379925 | -0.548250 |
| H | 6.582917 | -2.887792 | -0.224140 |
| H | 8.234629 | -1.078025 | 0.187968  |
| H | 7.486370 | 1.271259  | 0.270967  |

B3LYP energy = -1315.78589325 a.u.

(5S,1'S)-2a, Conf. C

|   |           |           |           |
|---|-----------|-----------|-----------|
| C | -0.838508 | 1.076709  | 1.172736  |
| N | -1.230395 | 0.241151  | -0.029373 |
| C | -0.314583 | 0.375712  | -0.972364 |
| N | 0.702314  | 1.134785  | -0.658915 |
| C | 0.510811  | 1.688830  | 0.695425  |
| C | -0.763649 | 0.374514  | 2.559100  |
| C | -2.535688 | -0.342553 | -0.295001 |
| C | 1.861570  | 1.453072  | -1.537902 |
| C | -2.674137 | -1.744327 | -0.326839 |
| C | -3.952016 | -2.262333 | -0.544326 |
| C | -5.046498 | -1.432742 | -0.729207 |
| C | -4.875655 | -0.057467 | -0.744540 |
| C | -3.619888 | 0.519979  | -0.551465 |
| C | -2.145954 | -0.160767 | 2.970326  |
| C | -0.362080 | 1.468466  | 3.572677  |
| C | 0.268895  | -0.760629 | 2.606477  |
| C | -3.484106 | 2.031210  | -0.706961 |
| C | -1.506672 | -2.714914 | -0.195253 |
| C | -1.727868 | -3.761969 | 0.908881  |
| C | -1.218460 | -3.408394 | -1.540002 |
| C | -3.784982 | 2.456411  | -2.156222 |
| C | -4.364372 | 2.808254  | 0.285373  |
| C | 3.167041  | 1.184687  | -0.797723 |
| C | 1.705482  | 2.862748  | -2.112765 |
| C | 3.670514  | -0.152868 | -0.675552 |
| C | 4.881692  | -0.366832 | 0.060533  |
| C | 5.554887  | 0.738029  | 0.637996  |
| C | 5.060122  | 2.005670  | 0.496400  |
| C | 3.866426  | 2.221791  | -0.222698 |
| C | 3.041540  | -1.289941 | -1.248198 |
| C | 3.569024  | -2.549958 | -1.104096 |
| C | 4.756393  | -2.752889 | -0.372042 |
| C | 5.396456  | -1.680961 | 0.193807  |
| H | -1.585500 | 1.863652  | 1.263705  |
| H | -0.415069 | -0.095455 | -1.940224 |
| H | 0.477067  | 2.776314  | 0.650058  |
| H | 1.347081  | 1.394701  | 1.323883  |
| H | 1.781553  | 0.755369  | -2.371091 |
| H | -4.090712 | -3.335233 | -0.570711 |
| H | -6.030005 | -1.859015 | -0.883268 |
| H | -5.729756 | 0.580559  | -0.931742 |
| H | -2.488722 | -0.968962 | 2.327283  |
| H | -2.900823 | 0.628283  | 2.952370  |

|   |           |           |           |
|---|-----------|-----------|-----------|
| H | -2.096548 | -0.546697 | 3.990159  |
| H | -1.074062 | 2.297325  | 3.568464  |
| H | -0.352967 | 1.044027  | 4.577568  |
| H | 0.634311  | 1.872836  | 3.383128  |
| H | 1.280328  | -0.420735 | 2.376607  |
| H | 0.020026  | -1.568697 | 1.920744  |
| H | 0.295684  | -1.183435 | 3.612225  |
| H | -2.449545 | 2.312759  | -0.515776 |
| H | -0.616967 | -2.145625 | 0.069976  |
| H | -0.835904 | -4.382230 | 1.017362  |
| H | -1.934870 | -3.297324 | 1.873815  |
| H | -2.561852 | -4.424025 | 0.670616  |
| H | -1.021407 | -2.687872 | -2.336712 |
| H | -2.063456 | -4.024121 | -1.854510 |
| H | -0.346307 | -4.059204 | -1.448383 |
| H | -3.617131 | 3.528933  | -2.275250 |
| H | -3.143369 | 1.930234  | -2.866082 |
| H | -4.822053 | 2.248792  | -2.425883 |
| H | -4.200173 | 3.881747  | 0.172123  |
| H | -4.144898 | 2.538451  | 1.319975  |
| H | -5.424582 | 2.616303  | 0.111270  |
| H | 2.539504  | 3.080641  | -2.779467 |
| H | 0.780862  | 2.924750  | -2.687213 |
| H | 1.676507  | 3.632660  | -1.342709 |
| H | 6.470421  | 0.561556  | 1.190043  |
| H | 5.578612  | 2.850451  | 0.931566  |
| H | 3.506615  | 3.237245  | -0.315352 |
| H | 2.136048  | -1.180189 | -1.827355 |
| H | 3.070085  | -3.395918 | -1.560394 |
| H | 5.160417  | -3.751608 | -0.265441 |
| H | 6.313706  | -1.822019 | 0.753190  |

B3LYP energy = -1315.78505447 a.u.

(5S,1'S)-2a, Conf. D

|   |           |           |           |
|---|-----------|-----------|-----------|
| C | -0.756950 | -0.763795 | 1.388461  |
| N | -1.226235 | -0.260526 | 0.040165  |
| C | -0.303813 | -0.513584 | -0.871598 |
| N | 0.776581  | -1.096300 | -0.420275 |
| C | 0.669633  | -1.277160 | 1.040478  |
| C | -1.653546 | -1.809981 | 2.112939  |
| C | -2.343826 | 0.632997  | -0.217833 |
| C | 1.918730  | -1.645021 | -1.192226 |
| C | -3.439140 | 0.171905  | -0.975939 |
| C | -4.505783 | 1.051140  | -1.169828 |
| C | -4.493357 | 2.331389  | -0.639426 |
| C | -3.385118 | 2.776441  | 0.063317  |
| C | -2.277039 | 1.953496  | 0.269610  |
| C | -3.034688 | -1.212836 | 2.432053  |
| C | -0.955822 | -2.122481 | 3.454503  |
| C | -1.820668 | -3.109129 | 1.311448  |
| C | -1.052036 | 2.546043  | 0.959372  |
| C | -3.498571 | -1.202520 | -1.633413 |
| C | -4.777823 | -1.977086 | -1.276306 |
| C | -3.351682 | -1.086406 | -3.162381 |
| C | -0.497350 | 3.748557  | 0.174275  |

|   |           |           |           |
|---|-----------|-----------|-----------|
| C | -1.343858 | 2.940337  | 2.417312  |
| C | 3.260298  | -1.221016 | -0.602464 |
| C | 1.783851  | -1.385633 | -2.692997 |
| C | 3.696565  | 0.140448  | -0.498687 |
| C | 5.010125  | 0.397783  | 0.017146  |
| C | 5.840113  | -0.683681 | 0.404096  |
| C | 5.397838  | -1.973910 | 0.298080  |
| C | 4.105952  | -2.232255 | -0.202132 |
| C | 2.907452  | 1.262019  | -0.869044 |
| C | 3.381896  | 2.545278  | -0.748895 |
| C | 4.675850  | 2.789130  | -0.246314 |
| C | 5.468198  | 1.735021  | 0.127424  |
| H | -0.687239 | 0.100318  | 2.045407  |
| H | -0.437297 | -0.237482 | -1.906387 |
| H | 1.454601  | -0.707416 | 1.535024  |
| H | 0.805497  | -2.329570 | 1.281093  |
| H | 1.854047  | -2.726646 | -1.048513 |
| H | -5.361172 | 0.726076  | -1.747258 |
| H | -5.339910 | 2.989455  | -0.791058 |
| H | -3.369307 | 3.790401  | 0.441468  |
| H | -3.605476 | -0.979856 | 1.535444  |
| H | -2.946678 | -0.299020 | 3.023643  |
| H | -3.613525 | -1.929686 | 3.017349  |
| H | -0.826240 | -1.218709 | 4.054509  |
| H | -1.569871 | -2.817198 | 4.029418  |
| H | 0.023191  | -2.586909 | 3.323635  |
| H | -0.866666 | -3.594857 | 1.096064  |
| H | -2.336877 | -2.942773 | 0.366924  |
| H | -2.417266 | -3.818314 | 1.887552  |
| H | -0.258266 | 1.799765  | 0.969277  |
| H | -2.656050 | -1.790786 | -1.272493 |
| H | -4.733926 | -2.982011 | -1.700838 |
| H | -4.906696 | -2.071721 | -0.197216 |
| H | -5.668147 | -1.490852 | -1.678496 |
| H | -4.180313 | -0.521723 | -3.594170 |
| H | -3.348659 | -2.078966 | -3.617862 |
| H | -2.426223 | -0.580899 | -3.447342 |
| H | 0.419599  | 4.108542  | 0.645099  |
| H | -0.265374 | 3.479915  | -0.858188 |
| H | -1.207166 | 4.577180  | 0.153137  |
| H | -2.092247 | 3.733539  | 2.467105  |
| H | -0.435546 | 3.308661  | 2.898337  |
| H | -1.719207 | 2.097087  | 2.999893  |
| H | 2.622165  | -1.868422 | -3.192983 |
| H | 0.866740  | -1.824168 | -3.089395 |
| H | 1.815012  | -0.327543 | -2.947490 |
| H | 6.831344  | -0.469478 | 0.785651  |
| H | 6.030717  | -2.800436 | 0.594798  |
| H | 3.775771  | -3.261901 | -0.278701 |
| H | 1.912496  | 1.118799  | -1.260687 |
| H | 2.755757  | 3.378087  | -1.043637 |
| H | 5.038455  | 3.805505  | -0.158888 |
| H | 6.464926  | 1.908856  | 0.515357  |

B3LYP energy = -1315.78383032 a.u.

(5S,1'S)-2a, Conf. E

|   |           |           |           |
|---|-----------|-----------|-----------|
| C | 1.644345  | -1.426574 | 1.026786  |
| N | 1.154316  | -0.337892 | 0.097187  |
| C | -0.085087 | -0.600295 | -0.275684 |
| N | -0.603013 | -1.686597 | 0.240046  |
| C | 0.432456  | -2.402932 | 1.011250  |
| C | 2.108995  | -0.997101 | 2.448257  |
| C | 1.969144  | 0.673889  | -0.555485 |
| C | -1.893657 | -2.319610 | -0.158140 |
| C | 2.915335  | 0.252308  | -1.511216 |
| C | 3.738895  | 1.224409  | -2.080431 |
| C | 3.601324  | 2.564794  | -1.756028 |
| C | 2.615393  | 2.962067  | -0.867113 |
| C | 1.775803  | 2.035175  | -0.246356 |
| C | 3.320530  | -0.053048 | 2.355941  |
| C | 2.576770  | -2.281766 | 3.165233  |
| C | 0.989981  | -0.336879 | 3.265537  |
| C | 0.678093  | 2.553226  | 0.676042  |
| C | 3.042540  | -1.185741 | -2.003522 |
| C | 2.716742  | -1.282274 | -3.505133 |
| C | 4.426902  | -1.785577 | -1.706432 |
| C | 1.225372  | 3.433315  | 1.812121  |
| C | -0.395982 | 3.314586  | -0.123458 |
| C | -2.856126 | -1.326826 | -0.791604 |
| C | -2.497550 | -3.124488 | 0.998588  |
| C | -3.435668 | -0.219340 | -0.087238 |
| C | -4.407665 | 0.586355  | -0.767185 |
| C | -4.762630 | 0.283559  | -2.105449 |
| C | -4.181227 | -0.767450 | -2.760745 |
| C | -3.229289 | -1.566877 | -2.096502 |
| C | -3.099426 | 0.141173  | 1.245317  |
| C | -3.698346 | 1.206599  | 1.871664  |
| C | -4.666311 | 1.982884  | 1.202832  |
| C | -5.007078 | 1.677795  | -0.089173 |
| H | 2.500994  | -1.895009 | 0.547156  |
| H | -0.625686 | 0.029876  | -0.966408 |
| H | 0.664038  | -3.345181 | 0.511646  |
| H | 0.065407  | -2.622970 | 2.009156  |
| H | -1.628258 | -3.039775 | -0.936750 |
| H | 4.484952  | 0.928464  | -2.806899 |
| H | 4.248875  | 3.302791  | -2.212901 |
| H | 2.493224  | 4.015008  | -0.649587 |
| H | 3.076991  | 0.897807  | 1.887142  |
| H | 4.136626  | -0.508231 | 1.790640  |
| H | 3.692584  | 0.157333  | 3.360397  |
| H | 3.373058  | -2.780687 | 2.607695  |
| H | 2.972574  | -2.022448 | 4.148254  |
| H | 1.768545  | -2.998632 | 3.320848  |
| H | 1.371294  | -0.060057 | 4.249803  |
| H | 0.142629  | -1.005926 | 3.428154  |
| H | 0.619666  | 0.571226  | 2.791687  |
| H | 0.186217  | 1.698814  | 1.138672  |
| H | 2.301576  | -1.798224 | -1.491131 |
| H | 2.736639  | -2.326010 | -3.825640 |
| H | 1.727262  | -0.876686 | -3.724279 |
| H | 3.443339  | -0.735047 | -4.108131 |

|   |           |           |           |
|---|-----------|-----------|-----------|
| H | 4.463740  | -2.827651 | -2.030765 |
| H | 4.664303  | -1.752069 | -0.641536 |
| H | 5.213535  | -1.245374 | -2.236316 |
| H | 0.412739  | 3.723713  | 2.481188  |
| H | 1.978860  | 2.911621  | 2.403720  |
| H | 1.677557  | 4.349219  | 1.428229  |
| H | -1.204984 | 3.628802  | 0.538895  |
| H | -0.827776 | 2.697682  | -0.914079 |
| H | 0.021010  | 4.208504  | -0.591725 |
| H | -3.419526 | -3.584710 | 0.644830  |
| H | -1.829040 | -3.926887 | 1.311982  |
| H | -2.737454 | -2.509773 | 1.863094  |
| H | -5.502026 | 0.901571  | -2.600896 |
| H | -4.449344 | -0.995934 | -3.784236 |
| H | -2.790797 | -2.402982 | -2.628620 |
| H | -2.355572 | -0.424398 | 1.786353  |
| H | -3.424787 | 1.452584  | 2.890216  |
| H | -5.133240 | 2.817626  | 1.710063  |
| H | -5.744326 | 2.271318  | -0.616601 |

B3LYP energy = -1315.78322334 a.u.

(5*S*,1'*S*)-**2a**, Conf. F

|   |           |           |           |
|---|-----------|-----------|-----------|
| C | -1.540053 | 0.542437  | 1.611723  |
| N | -1.373293 | 0.187848  | 0.148455  |
| C | -0.159719 | 0.522872  | -0.245203 |
| N | 0.618535  | 1.015266  | 0.685233  |
| C | -0.122426 | 1.085989  | 1.963268  |
| C | -2.068861 | -0.554654 | 2.579006  |
| C | -2.438785 | -0.100539 | -0.800243 |
| C | 2.020335  | 1.448590  | 0.446983  |
| C | -2.529657 | -1.387522 | -1.366007 |
| C | -3.592446 | -1.634584 | -2.237114 |
| C | -4.521666 | -0.652251 | -2.539770 |
| C | -4.381075 | 0.620200  | -2.008578 |
| C | -3.328609 | 0.935271  | -1.148089 |
| C | -3.490553 | -0.986689 | 2.178955  |
| C | -2.150858 | 0.105807  | 3.972510  |
| C | -1.155555 | -1.785887 | 2.661847  |
| C | -3.167469 | 2.383641  | -0.695976 |
| C | -1.512440 | -2.495479 | -1.121547 |
| C | -2.161638 | -3.797552 | -0.624794 |
| C | -0.676145 | -2.760925 | -2.387548 |
| C | -2.883640 | 3.303284  | -1.897935 |
| C | -4.379992 | 2.889476  | 0.102955  |
| C | 3.012414  | 0.289810  | 0.467391  |
| C | 2.400366  | 2.563459  | 1.426314  |
| C | 4.224239  | 0.384890  | -0.292179 |
| C | 5.160060  | -0.698979 | -0.229002 |
| C | 4.871277  | -1.829461 | 0.574608  |
| C | 3.704782  | -1.895326 | 1.286734  |
| C | 2.779775  | -0.832533 | 1.227171  |
| C | 4.554795  | 1.496055  | -1.114068 |
| C | 5.728440  | 1.534056  | -1.825986 |
| C | 6.645416  | 0.465190  | -1.757479 |
| C | 6.362777  | -0.624955 | -0.976141 |

|   |           |           |           |
|---|-----------|-----------|-----------|
| H | -2.260432 | 1.358116  | 1.650400  |
| H | 0.163533  | 0.416164  | -1.271474 |
| H | -0.155761 | 2.113408  | 2.317796  |
| H | 0.375592  | 0.480687  | 2.716743  |
| H | 2.005685  | 1.873167  | -0.556748 |
| H | -3.692509 | -2.613541 | -2.687369 |
| H | -5.345156 | -0.872508 | -3.207656 |
| H | -5.090249 | 1.389837  | -2.284562 |
| H | -3.516336 | -1.507863 | 1.223975  |
| H | -4.164296 | -0.129864 | 2.112472  |
| H | -3.890262 | -1.662773 | 2.936827  |
| H | -2.789423 | 0.992173  | 3.959007  |
| H | -2.579426 | -0.601630 | 4.683744  |
| H | -1.170708 | 0.396442  | 4.355227  |
| H | -0.161450 | -1.544785 | 3.042762  |
| H | -1.040457 | -2.280264 | 1.698573  |
| H | -1.589088 | -2.511500 | 3.352055  |
| H | -2.295296 | 2.454973  | -0.047229 |
| H | -0.823317 | -2.161974 | -0.347158 |
| H | -1.388284 | -4.528619 | -0.380153 |
| H | -2.766419 | -3.634712 | 0.268420  |
| H | -2.803616 | -4.242571 | -1.386726 |
| H | -0.181306 | -1.855842 | -2.745225 |
| H | -1.301105 | -3.138351 | -3.199465 |
| H | 0.092562  | -3.508392 | -2.180946 |
| H | -2.700723 | 4.323466  | -1.553810 |
| H | -2.006164 | 2.969020  | -2.454816 |
| H | -3.728433 | 3.330810  | -2.588152 |
| H | -4.203110 | 3.909961  | 0.448684  |
| H | -4.581329 | 2.265455  | 0.975683  |
| H | -5.282387 | 2.900353  | -0.510844 |
| H | 3.405486  | 2.911492  | 1.195279  |
| H | 1.719614  | 3.411791  | 1.344059  |
| H | 2.406894  | 2.204251  | 2.455832  |
| H | 5.588798  | -2.640321 | 0.613777  |
| H | 3.482929  | -2.759585 | 1.899868  |
| H | 1.866988  | -0.921232 | 1.799322  |
| H | 3.883255  | 2.340248  | -1.190281 |
| H | 5.952759  | 2.393779  | -2.445056 |
| H | 7.567938  | 0.509433  | -2.322481 |
| H | 7.059785  | -1.452634 | -0.917006 |

B3LYP energy = -1315.78252752 a.u.

(5*S*,1'*R*)-**2b**, Conf. A

|   |           |           |           |
|---|-----------|-----------|-----------|
| C | -0.941578 | 0.534210  | 1.437657  |
| N | -1.411797 | 0.181307  | 0.041162  |
| C | -0.419665 | 0.354093  | -0.815100 |
| N | 0.712790  | 0.731488  | -0.281485 |
| C | 0.551274  | 0.884672  | 1.176976  |
| C | -1.171267 | -0.505111 | 2.571121  |
| C | -2.791146 | 0.048110  | -0.400578 |
| C | 2.001545  | 0.994962  | -0.951486 |
| C | -3.261226 | -1.207239 | -0.834131 |
| C | -4.603153 | -1.299696 | -1.207597 |

|   |           |           |           |
|---|-----------|-----------|-----------|
| C | -5.443890 | -0.198966 | -1.161385 |
| C | -4.944531 | 1.036274  | -0.779423 |
| C | -3.607543 | 1.196337  | -0.413245 |
| C | -2.675845 | -0.743192 | 2.787213  |
| C | -0.607593 | 0.132449  | 3.859859  |
| C | -0.462004 | -1.842563 | 2.316725  |
| C | -3.099678 | 2.603136  | -0.112459 |
| C | -2.378621 | -2.441880 | -0.974462 |
| C | -2.929920 | -3.655683 | -0.208581 |
| C | -2.167836 | -2.793022 | -2.459311 |
| C | -3.223034 | 3.509307  | -1.351265 |
| C | -3.809929 | 3.232065  | 1.097737  |
| C | 3.048348  | -0.050580 | -0.575397 |
| C | 1.838956  | 1.129197  | -2.466166 |
| C | 4.410647  | 0.332268  | -0.360726 |
| C | 5.366501  | -0.690318 | -0.049685 |
| C | 4.947666  | -2.041033 | 0.028505  |
| C | 3.639380  | -2.379003 | -0.192354 |
| C | 2.694657  | -1.377628 | -0.494923 |
| C | 4.879236  | 1.670955  | -0.448070 |
| C | 6.199419  | 1.980318  | -0.232709 |
| C | 7.132506  | 0.970882  | 0.082708  |
| C | 6.721017  | -0.333457 | 0.170972  |
| H | -1.480934 | 1.433877  | 1.730032  |
| H | -0.549702 | 0.206708  | -1.876397 |
| H | 0.797795  | 1.907254  | 1.461685  |
| H | 1.236322  | 0.209437  | 1.684930  |
| H | 2.307477  | 1.962727  | -0.553925 |
| H | -4.994989 | -2.250668 | -1.543822 |
| H | -6.484244 | -0.299123 | -1.444759 |
| H | -5.599523 | 1.898041  | -0.786324 |
| H | -3.148196 | -1.230906 | 1.936740  |
| H | -3.204454 | 0.193946  | 2.975384  |
| H | -2.819788 | -1.383889 | 3.659070  |
| H | -1.088174 | 1.090283  | 4.073583  |
| H | -0.799069 | -0.530383 | 4.705002  |
| H | 0.470956  | 0.293723  | 3.812176  |
| H | 0.619702  | -1.732353 | 2.222829  |
| H | -0.831910 | -2.336138 | 1.419485  |
| H | -0.642851 | -2.514111 | 3.157722  |
| H | -2.036315 | 2.551377  | 0.120381  |
| H | -1.399111 | -2.212600 | -0.555678 |
| H | -2.230390 | -4.491046 | -0.280773 |
| H | -3.081409 | -3.433172 | 0.848505  |
| H | -3.884052 | -3.990164 | -0.619457 |
| H | -1.473434 | -3.630449 | -2.554794 |
| H | -1.764288 | -1.949534 | -3.023489 |
| H | -3.108431 | -3.083069 | -2.931567 |
| H | -2.794258 | 4.491346  | -1.140501 |
| H | -2.696891 | 3.085040  | -2.208610 |
| H | -4.265622 | 3.656102  | -1.638180 |
| H | -3.383303 | 4.212686  | 1.318144  |
| H | -3.715157 | 2.611656  | 1.990777  |
| H | -4.875121 | 3.370096  | 0.903574  |
| H | 2.803250  | 1.398424  | -2.894945 |
| H | 1.123473  | 1.911662  | -2.725383 |

|   |          |           |           |
|---|----------|-----------|-----------|
| H | 1.532959 | 0.187416  | -2.923596 |
| H | 5.681755 | -2.802542 | 0.262941  |
| H | 3.321650 | -3.412364 | -0.135964 |
| H | 1.666332 | -1.673549 | -0.663839 |
| H | 4.198447 | 2.473937  | -0.694986 |
| H | 6.528429 | 3.009335  | -0.306844 |
| H | 8.170096 | 1.230011  | 0.251353  |
| H | 7.429858 | -1.117766 | 0.409277  |

B3LYP energy = -1315.78591338 a.u.

(5*S*,1'*R*)-**2b**, Conf. B

|   |           |           |           |
|---|-----------|-----------|-----------|
| C | 1.572797  | -0.810988 | 1.575121  |
| N | 1.131816  | -0.235013 | 0.246495  |
| C | -0.049233 | -0.729218 | -0.080014 |
| N | -0.570296 | -1.546106 | 0.797624  |
| C | 0.359164  | -1.720103 | 1.929655  |
| C | 1.978727  | 0.181839  | 2.702810  |
| C | 1.961629  | 0.476974  | -0.711632 |
| C | -1.889809 | -2.235524 | 0.723879  |
| C | 2.991464  | -0.228813 | -1.364320 |
| C | 3.822450  | 0.487991  | -2.226199 |
| C | 3.613530  | 1.836061  | -2.471892 |
| C | 2.545199  | 2.489187  | -1.877859 |
| C | 1.692130  | 1.831547  | -0.989862 |
| C | 0.834490  | 1.116479  | 3.118713  |
| C | 3.203098  | 1.012357  | 2.280785  |
| C | 2.391238  | -0.686507 | 3.911519  |
| C | 0.494815  | 2.590299  | -0.429613 |
| C | 3.195455  | -1.734885 | -1.238200 |
| C | 2.929664  | -2.434389 | -2.584094 |
| C | 4.587688  | -2.097252 | -0.697165 |
| C | 0.893945  | 3.906526  | 0.257120  |
| C | -0.548881 | 2.851763  | -1.531995 |
| C | -2.810691 | -1.540224 | -0.267845 |
| C | -1.678219 | -3.732504 | 0.485429  |
| C | -3.494843 | -0.335674 | 0.106089  |
| C | -4.363203 | 0.286124  | -0.848756 |
| C | -4.524043 | -0.295304 | -2.130985 |
| C | -3.858583 | -1.443610 | -2.463827 |
| C | -3.005234 | -2.062749 | -1.526601 |
| C | -3.359288 | 0.283088  | 1.376793  |
| C | -4.042702 | 1.433349  | 1.687388  |
| C | -4.899436 | 2.037444  | 0.744507  |
| C | -5.054042 | 1.472374  | -0.494902 |
| H | 2.445918  | -1.430759 | 1.375301  |
| H | -0.541809 | -0.482302 | -1.008767 |
| H | 0.643043  | -2.766497 | 2.023302  |
| H | -0.136909 | -1.414623 | 2.848990  |
| H | -2.315843 | -2.124240 | 1.722711  |
| H | 4.632564  | -0.022961 | -2.730308 |
| H | 4.269620  | 2.372301  | -3.146205 |
| H | 2.366715  | 3.530906  | -2.110268 |
| H | 1.175439  | 1.775013  | 3.919483  |
| H | -0.031902 | 0.573437  | 3.500988  |
| H | 0.502794  | 1.747366  | 2.295828  |

|   |           |           |           |
|---|-----------|-----------|-----------|
| H | 2.984380  | 1.689893  | 1.457734  |
| H | 3.539638  | 1.615757  | 3.125867  |
| H | 4.035290  | 0.372321  | 1.980529  |
| H | 3.201379  | -1.372162 | 3.651960  |
| H | 1.561378  | -1.273819 | 4.309797  |
| H | 2.747597  | -0.042127 | 4.716341  |
| H | 0.014080  | 1.965829  | 0.321999  |
| H | 2.459517  | -2.130282 | -0.539168 |
| H | 3.009683  | -3.517139 | -2.465891 |
| H | 1.930426  | -2.204505 | -2.959530 |
| H | 3.651197  | -2.127667 | -3.343424 |
| H | 4.672502  | -3.178205 | -0.567946 |
| H | 4.782625  | -1.623604 | 0.266567  |
| H | 5.375119  | -1.784012 | -1.385021 |
| H | 0.015626  | 4.370264  | 0.710660  |
| H | 1.634286  | 3.745665  | 1.042239  |
| H | 1.311159  | 4.620958  | -0.454487 |
| H | -1.421410 | 3.355727  | -1.111813 |
| H | -0.888001 | 1.924417  | -1.998523 |
| H | -0.138976 | 3.487934  | -2.318923 |
| H | -2.642221 | -4.240164 | 0.469839  |
| H | -1.088429 | -4.167634 | 1.292168  |
| H | -1.162714 | -3.928095 | -0.454487 |
| H | -5.185615 | 0.184437  | -2.842413 |
| H | -3.985627 | -1.889291 | -3.442076 |
| H | -2.505157 | -2.976028 | -1.817899 |
| H | -2.714187 | -0.151388 | 2.127979  |
| H | -3.925113 | 1.879827  | 2.666989  |
| H | -5.433485 | 2.942722  | 1.004080  |
| H | -5.710868 | 1.926616  | -1.227327 |

B3LYP energy = -1315.78581352 a.u.

(5*S*,1'*R*)-**2b**, Conf. C

|   |           |           |           |
|---|-----------|-----------|-----------|
| C | 0.766724  | 0.847664  | 1.293291  |
| N | 1.223266  | 0.220967  | -0.008448 |
| C | 0.277791  | 0.370406  | -0.918997 |
| N | -0.783043 | 1.023270  | -0.522194 |
| C | -0.624653 | 1.419113  | 0.890503  |
| C | 1.706726  | 1.882546  | 1.975447  |
| C | 2.327648  | -0.708493 | -0.188776 |
| C | -1.927426 | 1.429637  | -1.384520 |
| C | 3.432094  | -0.322999 | -0.974876 |
| C | 4.486308  | -1.230250 | -1.095468 |
| C | 4.451656  | -2.466248 | -0.470066 |
| C | 3.334060  | -2.840002 | 0.259189  |
| C | 2.239074  | -1.986363 | 0.399054  |
| C | 0.977340  | 2.343110  | 3.256181  |
| C | 2.000119  | 3.106321  | 1.095365  |
| C | 3.027908  | 1.217776  | 2.398063  |
| C | 1.000472  | -2.507596 | 1.121393  |
| C | 3.516445  | 0.995441  | -1.735577 |
| C | 4.790752  | 1.788289  | -1.400511 |
| C | 3.413489  | 0.763302  | -3.254789 |
| C | 0.421202  | -3.740716 | 0.404063  |
| C | 1.275157  | -2.820543 | 2.602190  |

|   |           |           |           |
|---|-----------|-----------|-----------|
| C | -3.243855 | 1.122337  | -0.680656 |
| C | -1.746636 | 2.876396  | -1.850213 |
| C | -3.747395 | -0.220316 | -0.642763 |
| C | -4.978372 | -0.473685 | 0.046265  |
| C | -5.669333 | 0.598671  | 0.662836  |
| C | -5.172992 | 1.872117  | 0.603055  |
| C | -3.960883 | 2.127201  | -0.071465 |
| C | -3.099627 | -1.324811 | -1.257044 |
| C | -3.628851 | -2.590877 | -1.195810 |
| C | -4.836913 | -2.832791 | -0.510784 |
| C | -5.494874 | -1.792985 | 0.093341  |
| H | 0.634508  | 0.031931  | 2.001929  |
| H | 0.373906  | -0.032513 | -1.917533 |
| H | -1.435787 | 1.001459  | 1.482498  |
| H | -0.660878 | 2.503168  | 0.971234  |
| H | -1.851324 | 0.795401  | -2.267630 |
| H | 5.348761  | -0.963995 | -1.692310 |
| H | 5.287759  | -3.147385 | -0.568661 |
| H | 3.300654  | -3.823529 | 0.709524  |
| H | 0.733559  | 1.498194  | 3.904626  |
| H | 0.053971  | 2.884128  | 3.040444  |
| H | 1.624443  | 3.017134  | 3.819165  |
| H | 1.094339  | 3.635765  | 0.793310  |
| H | 2.611507  | 3.816050  | 1.655289  |
| H | 2.552434  | 2.840238  | 0.195760  |
| H | 3.615510  | 0.879604  | 1.546566  |
| H | 2.851247  | 0.358782  | 3.049013  |
| H | 3.633335  | 1.934588  | 2.955987  |
| H | 0.224931  | -1.743706 | 1.084357  |
| H | 2.666372  | 1.612449  | -1.447007 |
| H | 4.768966  | 2.757524  | -1.902880 |
| H | 4.888167  | 1.965167  | -0.328418 |
| H | 5.688312  | 1.265570  | -1.735516 |
| H | 3.422328  | 1.719417  | -3.782359 |
| H | 2.496977  | 0.235189  | -3.526347 |
| H | 4.254898  | 0.171708  | -3.620710 |
| H | -0.508553 | -4.049502 | 0.885926  |
| H | 0.205666  | -3.526804 | -0.644426 |
| H | 1.111023  | -4.585692 | 0.438769  |
| H | 0.356141  | -3.144735 | 3.094687  |
| H | 1.658521  | -1.950637 | 3.138750  |
| H | 2.008427  | -3.622338 | 2.707269  |
| H | -2.577084 | 3.161508  | -2.495775 |
| H | -0.822722 | 2.964965  | -2.422239 |
| H | -1.700058 | 3.583935  | -1.023059 |
| H | -6.599894 | 0.392556  | 1.178263  |
| H | -5.705017 | 2.692350  | 1.067794  |
| H | -3.603161 | 3.147169  | -0.103089 |
| H | -2.177345 | -1.183645 | -1.802398 |
| H | -3.115386 | -3.411301 | -1.681570 |
| H | -5.242389 | -3.835783 | -0.470056 |
| H | -6.427552 | -1.963969 | 0.617788  |

B3LYP energy = -1315.78532294 a.u.

(5*S*,1'*R*)-**2b**, Conf. D

|   |           |           |           |
|---|-----------|-----------|-----------|
| C | 0.765087  | -0.886586 | 1.281716  |
| N | 1.239373  | -0.249725 | -0.008840 |
| C | 0.351097  | -0.474637 | -0.961684 |
| N | -0.728564 | -1.104206 | -0.578221 |
| C | -0.621549 | -1.446287 | 0.852746  |
| C | 0.734122  | -0.013817 | 2.568320  |
| C | 2.591505  | 0.190055  | -0.314986 |
| C | -1.862840 | -1.578125 | -1.410380 |
| C | 2.843010  | 1.559964  | -0.527037 |
| C | 4.161765  | 1.942267  | -0.780177 |
| C | 5.187319  | 1.011609  | -0.828862 |
| C | 4.905960  | -0.336030 | -0.668007 |
| C | 3.605204  | -0.782132 | -0.431167 |
| C | 0.198178  | -0.927051 | 3.692719  |
| C | -0.172823 | 1.219071  | 2.445019  |
| C | 2.158357  | 0.420446  | 2.954878  |
| C | 3.348151  | -2.285111 | -0.379795 |
| C | 1.756979  | 2.629210  | -0.548420 |
| C | 2.043427  | 3.781957  | 0.427791  |
| C | 1.549340  | 3.174069  | -1.973896 |
| C | 3.697181  | -2.947569 | -1.725375 |
| C | 4.097748  | -2.969141 | 0.775438  |
| C | -3.210945 | -1.268563 | -0.766151 |
| C | -1.736114 | -1.136419 | -2.869430 |
| C | -3.695648 | 0.055713  | -0.510065 |
| C | -5.005093 | 0.205458  | 0.056577  |
| C | -5.785421 | -0.942378 | 0.342251  |
| C | -5.298493 | -2.195640 | 0.090022  |
| C | -4.009716 | -2.348565 | -0.459347 |
| C | -2.956969 | 1.239878  | -0.772027 |
| C | -3.473822 | 2.483533  | -0.503390 |
| C | -4.763392 | 2.622192  | 0.048288  |
| C | -5.508360 | 1.504382  | 0.320368  |
| H | 1.446112  | -1.711483 | 1.487042  |
| H | 0.522570  | -0.166396 | -1.981800 |
| H | -0.692733 | -2.527047 | 0.972309  |
| H | -1.445041 | -0.985827 | 1.393344  |
| H | -1.770342 | -2.667216 | -1.398363 |
| H | 4.388078  | 2.987524  | -0.945329 |
| H | 6.204068  | 1.334696  | -1.014685 |
| H | 5.708164  | -1.057859 | -0.750748 |
| H | 0.805528  | -1.829291 | 3.798636  |
| H | -0.837603 | -1.229951 | 3.529092  |
| H | 0.233013  | -0.390300 | 4.641779  |
| H | -1.202126 | 0.961421  | 2.189357  |
| H | -0.201895 | 1.743581  | 3.401733  |
| H | 0.194110  | 1.922389  | 1.699545  |
| H | 2.603736  | 1.089834  | 2.221215  |
| H | 2.818439  | -0.442150 | 3.069786  |
| H | 2.132490  | 0.945491  | 3.911387  |
| H | 2.282651  | -2.453507 | -0.225069 |
| H | 0.818780  | 2.168990  | -0.241499 |
| H | 1.199690  | 4.474890  | 0.442876  |
| H | 2.203938  | 3.422904  | 1.445162  |
| H | 2.927606  | 4.348755  | 0.130802  |
| H | 0.736287  | 3.903119  | -1.983232 |

|   |           |           |           |
|---|-----------|-----------|-----------|
| H | 1.301891  | 2.380898  | -2.682351 |
| H | 2.449081  | 3.672773  | -2.339492 |
| H | 3.428421  | -4.005816 | -1.702283 |
| H | 3.160723  | -2.477065 | -2.551892 |
| H | 4.765262  | -2.880449 | -1.938902 |
| H | 3.853713  | -4.032997 | 0.805209  |
| H | 3.838075  | -2.534303 | 1.742407  |
| H | 5.178792  | -2.881073 | 0.652915  |
| H | -2.576280 | -1.555067 | -3.421496 |
| H | -0.820655 | -1.523887 | -3.320155 |
| H | -1.766064 | -0.054792 | -2.993963 |
| H | -6.773963 | -0.808588 | 0.765103  |
| H | -5.892879 | -3.073257 | 0.309659  |
| H | -3.642901 | -3.350850 | -0.648261 |
| H | -1.967150 | 1.176449  | -1.195616 |
| H | -2.885853 | 3.367169  | -0.718520 |
| H | -5.159771 | 3.608556  | 0.253342  |
| H | -6.501091 | 1.596714  | 0.744766  |

B3LYP energy = -1315.78362839 a.u.

(5*S*,1'*R*)-**2b**, Conf. E

|   |           |           |           |
|---|-----------|-----------|-----------|
| C | 1.704511  | -1.161689 | -1.280005 |
| N | 1.127534  | -0.297290 | -0.180921 |
| C | -0.165420 | -0.537956 | -0.060608 |
| N | -0.645715 | -1.429522 | -0.890801 |
| C | 0.442531  | -1.944043 | -1.745965 |
| C | 2.924593  | -2.064229 | -0.933546 |
| C | 1.759502  | 0.855044  | 0.441589  |
| C | -1.974018 | -2.099201 | -0.805123 |
| C | 2.003854  | 1.998492  | -0.344412 |
| C | 2.663578  | 3.069380  | 0.260073  |
| C | 3.024079  | 3.031896  | 1.597671  |
| C | 2.710809  | 1.922574  | 2.366973  |
| C | 2.073229  | 0.810371  | 1.814775  |
| C | 3.295593  | -2.800705 | -2.238917 |
| C | 2.618436  | -3.097808 | 0.160454  |
| C | 4.132793  | -1.208410 | -0.515854 |
| C | 1.710464  | -0.353478 | 2.729626  |
| C | 1.542535  | 2.151747  | -1.790623 |
| C | 0.574011  | 3.338811  | -1.941209 |
| C | 2.724438  | 2.286257  | -2.766037 |
| C | 2.917543  | -0.887848 | 3.517654  |
| C | 0.570817  | 0.036402  | 3.688992  |
| C | -2.957177 | -1.343974 | 0.075858  |
| C | -2.512391 | -2.437814 | -2.200589 |
| C | -3.460282 | -0.034898 | -0.225911 |
| C | -4.449364 | 0.532127  | 0.644509  |
| C | -4.903125 | -0.201478 | 1.768837  |
| C | -4.399057 | -1.444054 | 2.040435  |
| C | -3.425804 | -2.006038 | 1.190390  |
| C | -3.028396 | 0.750245  | -1.328314 |
| C | -3.547293 | 1.999607  | -1.565501 |
| C | -4.528791 | 2.544444  | -0.713027 |
| C | -4.965304 | 1.823342  | 0.367679  |
| H | 2.028930  | -0.489550 | -2.072174 |

|                                    |           |           |           |   |           |           |           |
|------------------------------------|-----------|-----------|-----------|---|-----------|-----------|-----------|
| H                                  | -0.782971 | -0.023102 | 0.660049  | C | -2.921986 | 0.005238  | 1.762424  |
| H                                  | 0.209986  | -1.767496 | -2.793762 | C | -2.612896 | 1.776128  | -3.491253 |
| H                                  | 0.538379  | -3.017834 | -1.591394 | C | -2.486359 | 2.952107  | -1.276632 |
| H                                  | -1.775439 | -3.050334 | -0.303804 | C | -4.047344 | 1.007612  | -1.607966 |
| H                                  | 2.877785  | 3.956967  | -0.321057 | C | -2.620296 | 1.416187  | 2.252821  |
| H                                  | 3.531382  | 3.876873  | 2.046390  | C | -1.681683 | -2.681310 | -0.746997 |
| H                                  | 2.965713  | 1.919788  | 3.418627  | C | -0.826749 | -3.796167 | -0.116404 |
| H                                  | 3.518684  | -2.097204 | -3.044602 | C | -2.567670 | -3.244470 | -1.870162 |
| H                                  | 2.504815  | -3.471156 | -2.580537 | C | -3.885590 | 2.273492  | 2.418008  |
| H                                  | 4.186393  | -3.408112 | -2.073166 | C | -1.819336 | 1.375399  | 3.567932  |
| H                                  | 1.807023  | -3.774239 | -0.115254 | C | 3.023386  | 0.175354  | -0.517858 |
| H                                  | 3.501570  | -3.715197 | 0.332924  | C | 2.453928  | 2.480234  | -1.430845 |
| H                                  | 2.360775  | -2.626500 | 1.107748  | C | 4.237905  | 0.226094  | 0.241517  |
| H                                  | 3.967255  | -0.681579 | 0.421935  | C | 5.148248  | -0.877647 | 0.155507  |
| H                                  | 4.381005  | -0.468202 | -1.279401 | C | 4.832954  | -1.983443 | -0.671884 |
| H                                  | 5.004463  | -1.852294 | -0.384661 | C | 3.665269  | -2.006470 | -1.384831 |
| H                                  | 1.343332  | -1.171982 | 2.111969  | C | 2.764113  | -0.924645 | -1.302197 |
| H                                  | 0.979468  | 1.263084  | -2.075725 | C | 4.594675  | 1.312236  | 1.085692  |
| H                                  | 0.202043  | 3.387766  | -2.966842 | C | 5.768401  | 1.308005  | 1.798253  |
| H                                  | -0.283101 | 3.240197  | -1.272753 | C | 6.659724  | 0.219200  | 1.708062  |
| H                                  | 1.065113  | 4.288097  | -1.721491 | C | 6.351922  | -0.847539 | 0.904250  |
| H                                  | 2.360896  | 2.352161  | -3.793590 | H | -1.762195 | -0.340501 | -2.149352 |
| H                                  | 3.404696  | 1.434871  | -2.701747 | H | 0.223495  | 0.233772  | 1.224839  |
| H                                  | 3.304662  | 3.187691  | -2.560594 | H | 0.355973  | 0.453370  | -2.740640 |
| H                                  | 2.623807  | -1.767132 | 4.094686  | H | -0.098094 | 2.099430  | -2.303730 |
| H                                  | 3.737296  | -1.174828 | 2.857495  | H | 2.062340  | 1.764840  | 0.542293  |
| H                                  | 3.299328  | -0.147114 | 4.222284  | H | -3.614540 | -3.701450 | 0.816397  |
| H                                  | 0.284638  | -0.821046 | 4.301759  | H | -4.834637 | -2.657401 | 2.676898  |
| H                                  | -0.315528 | 0.378696  | 3.150850  | H | -4.347179 | -0.339303 | 3.327258  |
| H                                  | 0.879431  | 0.839989  | 4.360452  | H | -2.730262 | 0.823831  | -4.013680 |
| H                                  | -3.461239 | -2.959619 | -2.080881 | H | -1.681742 | 2.236600  | -3.826513 |
| H                                  | -1.834180 | -3.106087 | -2.731851 | H | -3.428064 | 2.429589  | -3.805002 |
| H                                  | -2.686301 | -1.556350 | -2.813814 | H | -1.541312 | 3.431219  | -1.539797 |
| H                                  | -5.655291 | 0.241242  | 2.410868  | H | -3.284229 | 3.625480  | -1.594062 |
| H                                  | -4.743456 | -2.003368 | 2.900769  | H | -2.537799 | 2.875750  | -0.191802 |
| H                                  | -3.046551 | -2.995319 | 1.417971  | H | -4.189835 | 0.885412  | -0.535989 |
| H                                  | -2.272946 | 0.368771  | -1.998694 | H | -4.203183 | 0.035946  | -2.081532 |
| H                                  | -3.198902 | 2.572176  | -2.416027 | H | -4.826679 | 1.680106  | -1.971047 |
| H                                  | -4.931194 | 3.529299  | -0.913324 | H | -1.994001 | 1.910098  | 1.511152  |
| H                                  | -5.715862 | 2.232974  | 1.033191  | H | -0.981189 | -1.980420 | -1.199726 |
| B3LYP energy = -1315.78340168 a.u. |           |           |           | H | -0.201571 | -4.264907 | -0.879323 |
| (5S,1'R)-2b, Conf. F               |           |           |           | H | -0.172990 | -3.404009 | 0.664729  |
| C                                  | -1.538981 | 0.575789  | -1.606106 | H | -1.450120 | -4.574671 | 0.327011  |
| N                                  | -1.366750 | 0.192989  | -0.151041 | H | -1.949011 | -3.714443 | -2.637427 |
| C                                  | -0.127757 | 0.443149  | 0.224025  | H | -3.165213 | -2.465525 | -2.347122 |
| N                                  | 0.647767  | 0.950204  | -0.701076 | H | -3.255384 | -4.002471 | -1.490672 |
| C                                  | -0.105017 | 1.066495  | -1.968361 | H | -3.609839 | 3.295429  | 2.685987  |
| C                                  | -2.667035 | 1.589009  | -1.959414 | H | -4.470890 | 2.312544  | 1.498068  |
| C                                  | -2.285671 | -0.592744 | 0.656627  | H | -4.531747 | 1.890552  | 3.209606  |
| C                                  | 2.058248  | 1.356542  | -0.467779 | H | -1.555823 | 2.387943  | 3.880816  |
| C                                  | -2.485345 | -1.946387 | 0.320972  | H | -0.896469 | 0.799894  | 3.465729  |
| C                                  | -3.427667 | -2.663416 | 1.059334  | H | -2.403024 | 0.918082  | 4.369179  |
| C                                  | -4.108621 | -2.081309 | 2.116840  | H | 3.468579  | 2.801817  | -1.202679 |
| C                                  | -3.837713 | -0.770377 | 2.475541  | H | 1.793517  | 3.342271  | -1.326481 |
|                                    |           |           |           | H | 2.443334  | 2.140190  | -2.466884 |
|                                    |           |           |           | H | 5.530875  | -2.810267 | -0.728783 |



|   |          |           |           |
|---|----------|-----------|-----------|
| H | 3.423716 | -2.852200 | -2.016096 |
| H | 1.849749 | -0.982668 | -1.877007 |
| H | 3.943329 | 2.170268  | 1.178941  |
| H | 6.012821 | 2.149489  | 2.434553  |
| H | 7.582651 | 0.229870  | 2.274033  |
| H | 7.029190 | -1.689990 | 0.827966  |

B3LYP energy = -1315.78265601 a.u.

(5S,1'S)-**3a**, Conf. A

|   |           |           |           |
|---|-----------|-----------|-----------|
| C | 0.452857  | -1.106928 | 0.930008  |
| C | -0.937953 | -0.555281 | 1.355318  |
| N | -1.547720 | -0.219617 | 0.010627  |
| C | -0.666782 | -0.460359 | -0.945149 |
| N | 0.472321  | -0.956038 | -0.537353 |
| C | -1.733157 | -1.489833 | 2.310852  |
| C | -0.861463 | -1.645259 | 3.576593  |
| C | -2.008293 | -2.877646 | 1.714462  |
| C | -3.058015 | -0.829385 | 2.729572  |
| C | 1.633291  | -1.390151 | -1.348021 |
| C | -2.737216 | 0.581767  | -0.230597 |
| C | -3.868161 | -0.020571 | -0.816130 |
| C | -5.002577 | 0.773466  | -0.993380 |
| C | -5.018307 | 2.106072  | -0.612629 |
| C | -3.875817 | 2.688466  | -0.086527 |
| C | -2.704308 | 1.952230  | 0.094326  |
| C | -1.447807 | 2.682043  | 0.557694  |
| C | -1.007531 | 3.721322  | -0.489607 |
| C | -1.619197 | 3.332837  | 1.939818  |
| C | -3.893457 | -1.460236 | -1.314951 |
| C | -5.082417 | -2.261112 | -0.760093 |
| C | -3.884635 | -1.507311 | -2.854786 |
| C | 1.340964  | -1.323765 | -2.845859 |
| C | 2.872265  | -0.602655 | -0.952927 |
| C | 3.998549  | -1.262712 | -0.526040 |
| C | 5.184132  | -0.561364 | -0.189430 |
| C | 5.194809  | 0.863006  | -0.290288 |
| C | 4.017043  | 1.521244  | -0.728275 |
| C | 2.890507  | 0.812113  | -1.052398 |
| C | 6.355979  | -1.227508 | 0.248596  |
| C | 7.485285  | -0.516790 | 0.570361  |
| C | 7.495683  | 0.892448  | 0.470521  |
| C | 6.376407  | 1.566872  | 0.050254  |
| H | 1.277992  | -0.549159 | 1.368036  |
| H | 0.579291  | -2.160162 | 1.176711  |
| H | -0.809853 | 0.388164  | 1.884174  |
| H | -0.880652 | -0.245402 | -1.981040 |
| H | -0.636350 | -0.675504 | 4.027078  |
| H | 0.082661  | -2.155440 | 3.376067  |
| H | -1.400206 | -2.238375 | 4.316912  |
| H | -1.094321 | -3.398243 | 1.421734  |
| H | -2.662501 | -2.827309 | 0.845920  |
| H | -2.504414 | -3.500293 | 2.460926  |
| H | -2.887596 | 0.153904  | 3.173751  |
| H | -3.744981 | -0.707499 | 1.894034  |

|   |           |           |           |
|---|-----------|-----------|-----------|
| H | -3.553048 | -1.449257 | 3.479301  |
| H | 1.798440  | -2.435967 | -1.077145 |
| H | -5.888374 | 0.340446  | -1.439231 |
| H | -5.915419 | 2.697483  | -0.747132 |
| H | -3.886028 | 3.740552  | 0.167440  |
| H | -0.632284 | 1.963806  | 0.633663  |
| H | -0.064822 | 4.182470  | -0.187658 |
| H | -0.864578 | 3.259630  | -1.468646 |
| H | -1.747583 | 4.515836  | -0.600184 |
| H | -0.683340 | 3.798842  | 2.254886  |
| H | -1.906207 | 2.602014  | 2.698165  |
| H | -2.385643 | 4.109758  | 1.921350  |
| H | -2.983949 | -1.953046 | -0.974460 |
| H | -5.006255 | -3.304565 | -1.072730 |
| H | -5.114115 | -2.236312 | 0.330185  |
| H | -6.034282 | -1.877248 | -1.130847 |
| H | -3.851505 | -2.543025 | -3.199391 |
| H | -3.022626 | -0.983373 | -3.273652 |
| H | -4.783413 | -1.044799 | -3.267357 |
| H | 2.203462  | -1.721571 | -3.378443 |
| H | 0.473772  | -1.929791 | -3.112829 |
| H | 1.186928  | -0.300593 | -3.191516 |
| H | 3.997182  | -2.344440 | -0.443612 |
| H | 4.020840  | 2.602152  | -0.806799 |
| H | 2.005969  | 1.342401  | -1.385306 |
| H | 6.347763  | -2.308695 | 0.324029  |
| H | 8.376219  | -1.035003 | 0.902506  |
| H | 8.394385  | 1.439245  | 0.727368  |
| H | 6.383164  | 2.647825  | -0.026893 |

B3LYP energy = -1315.79105788 a.u.

(5S,1'S)-**3a**, Conf. B

|   |           |           |           |
|---|-----------|-----------|-----------|
| C | -0.285257 | -1.461713 | -1.087326 |
| C | 1.031962  | -0.701172 | -1.410622 |
| N | 1.453647  | -0.239295 | -0.030708 |
| C | 0.570446  | -0.652332 | 0.862386  |
| N | -0.418578 | -1.356553 | 0.377633  |
| C | 2.057078  | -1.518933 | -2.248665 |
| C | 1.355160  | -1.852108 | -3.583672 |
| C | 2.490443  | -2.823631 | -1.565179 |
| C | 3.294150  | -0.663367 | -2.571658 |
| C | -1.525755 | -2.016362 | 1.102563  |
| C | 2.450830  | 0.772959  | 0.279069  |
| C | 3.619867  | 0.405297  | 0.974887  |
| C | 4.568621  | 1.401415  | 1.212702  |
| C | 4.371469  | 2.705060  | 0.786221  |
| C | 3.191533  | 3.051805  | 0.147085  |
| C | 2.195813  | 2.106036  | -0.100271 |
| C | 0.876649  | 2.578714  | -0.702681 |
| C | 0.172450  | 3.579292  | 0.231804  |
| C | 1.056721  | 3.179897  | -2.106529 |
| C | 3.878447  | -0.993395 | 1.522115  |
| C | 5.220652  | -1.575973 | 1.049528  |
| C | 3.802120  | -1.004846 | 3.060392  |
| C | -1.315105 | -1.990655 | 2.615350  |

|   |           |           |           |
|---|-----------|-----------|-----------|
| C | -2.867648 | -1.426337 | 0.687663  |
| C | -3.121202 | -0.078774 | 0.793076  |
| C | -4.383198 | 0.463054  | 0.448631  |
| C | -5.409631 | -0.416973 | -0.015667 |
| C | -5.123244 | -1.800386 | -0.115215 |
| C | -3.888172 | -2.291154 | 0.224851  |
| C | -4.664554 | 1.849759  | 0.553650  |
| C | -5.899349 | 2.340867  | 0.213983  |
| C | -6.913533 | 1.470471  | -0.247637 |
| C | -6.674467 | 0.124463  | -0.359677 |
| H | -1.155322 | -1.014560 | -1.565023 |
| H | -0.242376 | -2.513666 | -1.363894 |
| H | 0.805371  | 0.194183  | -1.986177 |
| H | 0.661726  | -0.407659 | 1.909605  |
| H | 1.014287  | -0.947478 | -4.092895 |
| H | 0.497174  | -2.514201 | -3.453880 |
| H | 2.058906  | -2.359395 | -4.245191 |
| H | 1.647875  | -3.479972 | -1.338468 |
| H | 3.034206  | -2.638396 | -0.640320 |
| H | 3.156222  | -3.377771 | -2.229029 |
| H | 3.015377  | 0.261110  | -3.082040 |
| H | 3.862982  | -0.398487 | -1.682625 |
| H | 3.957023  | -1.220248 | -3.236267 |
| H | -1.500083 | -3.057956 | 0.772666  |
| H | 5.478117  | 1.150703  | 1.742729  |
| H | 5.129426  | 3.456193  | 0.970653  |
| H | 3.030535  | 4.081072  | -0.146419 |
| H | 0.207448  | 1.724075  | -0.794228 |
| H | -0.803575 | 3.849327  | -0.176951 |
| H | 0.020647  | 3.156235  | 1.226793  |
| H | 0.751237  | 4.497693  | 0.344037  |
| H | 0.087341  | 3.459954  | -2.523765 |
| H | 1.530434  | 2.475123  | -2.792187 |
| H | 1.676489  | 4.077973  | -2.075530 |
| H | 3.092958  | -1.653586 | 1.156983  |
| H | 5.320984  | -2.606768 | 1.395710  |
| H | 5.302989  | -1.575442 | -0.038138 |
| H | 6.065558  | -1.012450 | 1.449055  |
| H | 3.934338  | -2.021709 | 3.435991  |
| H | 2.842613  | -0.631050 | 3.423264  |
| H | 4.584769  | -0.382260 | 3.498424  |
| H | -2.125282 | -2.548386 | 3.083046  |
| H | -0.373353 | -2.464297 | 2.898639  |
| H | -1.347335 | -0.975551 | 3.013664  |
| H | -2.352185 | 0.600104  | 1.146355  |
| H | -5.896536 | -2.472350 | -0.468334 |
| H | -3.688108 | -3.353092 | 0.140631  |
| H | -3.888993 | 2.517381  | 0.910888  |
| H | -6.104087 | 3.400832  | 0.299223  |
| H | -7.883305 | 1.873713  | -0.511337 |
| H | -7.451759 | -0.543892 | -0.711079 |

B3LYP energy = -1315.79001824 a.u.

(5*S*,1'*S*)-**3a**, Conf. C

|   |           |           |          |
|---|-----------|-----------|----------|
| C | -0.379609 | -1.390813 | 0.661186 |
|---|-----------|-----------|----------|

|   |           |           |           |
|---|-----------|-----------|-----------|
| C | 0.953011  | -0.794018 | 1.203689  |
| N | 1.543991  | -0.189505 | -0.053282 |
| C | 0.707879  | -0.368546 | -1.060215 |
| N | -0.396922 | -0.999197 | -0.761468 |
| C | 0.782768  | 0.137629  | 2.437899  |
| C | 2.152445  | 0.640778  | 2.924502  |
| C | 0.177754  | -0.734734 | 3.558990  |
| C | -0.146453 | 1.328348  | 2.165939  |
| C | -1.518442 | -1.274245 | -1.696258 |
| C | 2.922572  | 0.225747  | -0.254587 |
| C | 3.209080  | 1.584345  | -0.493892 |
| C | 4.549875  | 1.945624  | -0.636031 |
| C | 5.563998  | 1.004402  | -0.553394 |
| C | 5.252174  | -0.333871 | -0.372346 |
| C | 3.929387  | -0.759377 | -0.242165 |
| C | 3.648971  | -2.257012 | -0.168703 |
| C | 4.065770  | -2.953112 | -1.477431 |
| C | 4.319304  | -2.921127 | 1.044970  |
| C | 2.138170  | 2.653498  | -0.669825 |
| C | 2.359409  | 3.878278  | 0.231696  |
| C | 2.038113  | 3.079958  | -2.146588 |
| C | -1.651872 | -2.777102 | -1.932677 |
| C | -2.775755 | -0.559386 | -1.219130 |
| C | -3.852417 | -1.224163 | -0.684859 |
| C | -5.008409 | -0.527271 | -0.246841 |
| C | -5.047891 | 0.894850  | -0.364151 |
| C | -3.925544 | 1.558870  | -0.922347 |
| C | -2.826993 | 0.854667  | -1.336325 |
| C | -6.127152 | -1.201500 | 0.303411  |
| C | -7.231570 | -0.500534 | 0.719359  |
| C | -7.269745 | 0.906870  | 0.603455  |
| C | -6.203063 | 1.588953  | 0.072894  |
| H | -0.409728 | -2.475977 | 0.745423  |
| H | -1.256174 | -0.981330 | 1.157090  |
| H | 1.617785  | -1.598890 | 1.510856  |
| H | 0.927858  | -0.027479 | -2.061971 |
| H | 2.640580  | 1.288497  | 2.199038  |
| H | 2.826248  | -0.190861 | 3.142379  |
| H | 2.022848  | 1.212130  | 3.845489  |
| H | 0.806929  | -1.602203 | 3.772458  |
| H | -0.825700 | -1.091396 | 3.319827  |
| H | 0.101907  | -0.145907 | 4.474247  |
| H | 0.251918  | 1.992624  | 1.400377  |
| H | -1.146880 | 1.018728  | 1.858443  |
| H | -0.260099 | 1.915788  | 3.078640  |
| H | -1.210975 | -0.809870 | -2.635442 |
| H | 4.803624  | 2.981783  | -0.817133 |
| H | 6.597668  | 1.311450  | -0.653100 |
| H | 6.049445  | -1.065717 | -0.353244 |
| H | 2.574420  | -2.409190 | -0.072753 |
| H | 3.799799  | -4.011715 | -1.440379 |
| H | 3.566646  | -2.506143 | -2.339682 |
| H | 5.142724  | -2.885093 | -1.640848 |
| H | 4.049912  | -3.978204 | 1.092247  |
| H | 4.016206  | -2.450716 | 1.982359  |
| H | 5.407192  | -2.860306 | 0.981107  |

|   |           |           |           |
|---|-----------|-----------|-----------|
| H | 1.176977  | 2.222241  | -0.393918 |
| H | 1.522745  | 4.572284  | 0.127966  |
| H | 2.436563  | 3.598023  | 1.283256  |
| H | 3.268028  | 4.419023  | -0.038204 |
| H | 1.219745  | 3.790423  | -2.281178 |
| H | 1.860116  | 2.226726  | -2.805104 |
| H | 2.959442  | 3.562867  | -2.478399 |
| H | -2.429736 | -2.962898 | -2.672936 |
| H | -0.712924 | -3.178119 | -2.315141 |
| H | -1.911958 | -3.322108 | -1.025263 |
| H | -3.848480 | -2.302815 | -0.592565 |
| H | -3.952036 | 2.637301  | -1.025352 |
| H | -1.985846 | 1.384129  | -1.769692 |
| H | -6.098765 | -2.281584 | 0.388950  |
| H | -8.081410 | -1.025255 | 1.137749  |
| H | -8.148313 | 1.446200  | 0.934942  |
| H | -6.232385 | 2.668438  | -0.018650 |

B3LYP energy = -1315.78990121 a.u.

(5S,1'S)-**3a**, Conf. D

|   |           |           |           |
|---|-----------|-----------|-----------|
| C | 1.104516  | -2.466901 | -0.993159 |
| C | 2.204934  | -1.403481 | -0.709085 |
| N | 1.385795  | -0.284245 | -0.101838 |
| C | 0.114859  | -0.643238 | -0.051329 |
| N | -0.138849 | -1.843375 | -0.503561 |
| C | 3.419745  | -1.936947 | 0.104006  |
| C | 4.055143  | -3.053018 | -0.753303 |
| C | 3.020789  | -2.509699 | 1.471473  |
| C | 4.472462  | -0.830428 | 0.288973  |
| C | -1.445874 | -2.558448 | -0.490107 |
| C | 1.812916  | 1.090703  | 0.097231  |
| C | 1.915374  | 1.599462  | 1.407432  |
| C | 2.379097  | 2.907537  | 1.557205  |
| C | 2.722111  | 3.682919  | 0.460950  |
| C | 2.561960  | 3.177708  | -0.819556 |
| C | 2.082578  | 1.884885  | -1.034805 |
| C | 1.815890  | 1.437571  | -2.468432 |
| C | 0.736708  | 2.317262  | -3.126152 |
| C | 3.094124  | 1.412945  | -3.322955 |
| C | 1.491773  | 0.826987  | 2.651027  |
| C | 2.589344  | 0.779005  | 3.726413  |
| C | 0.189970  | 1.407636  | 3.235143  |
| C | -1.496372 | -3.549374 | 0.672697  |
| C | -2.593161 | -1.564730 | -0.557460 |
| C | -3.327754 | -1.204535 | 0.547092  |
| C | -4.385131 | -0.262671 | 0.456147  |
| C | -4.688027 | 0.319993  | -0.811566 |
| C | -3.919315 | -0.070895 | -1.937764 |
| C | -2.905665 | -0.983134 | -1.815099 |
| C | -5.151058 | 0.117286  | 1.586846  |
| C | -6.168570 | 1.030601  | 1.467300  |
| C | -6.468191 | 1.606301  | 0.212478  |
| C | -5.745272 | 1.258835  | -0.901492 |
| H | 1.002142  | -2.691578 | -2.054624 |
| H | 1.283424  | -3.398239 | -0.461110 |

|   |           |           |           |
|---|-----------|-----------|-----------|
| H | 2.601872  | -1.028189 | -1.649977 |
| H | -0.658899 | 0.014510  | 0.317169  |
| H | 4.345564  | -2.681980 | -1.739324 |
| H | 3.389435  | -3.906910 | -0.892264 |
| H | 4.955363  | -3.421662 | -0.259477 |
| H | 2.294614  | -3.321658 | 1.393738  |
| H | 2.606022  | -1.745643 | 2.127157  |
| H | 3.903622  | -2.918653 | 1.965849  |
| H | 4.784083  | -0.414104 | -0.671516 |
| H | 4.112650  | -0.012447 | 0.909939  |
| H | 5.358052  | -1.248420 | 0.770883  |
| H | -1.447159 | -3.125720 | -1.424022 |
| H | 2.472795  | 3.326244  | 2.550605  |
| H | 3.093034  | 4.690173  | 0.604198  |
| H | 2.792986  | 3.806357  | -1.669732 |
| H | 1.412334  | 0.425985  | -2.449851 |
| H | 0.501302  | 1.937363  | -4.122666 |
| H | -0.183120 | 2.324574  | -2.538311 |
| H | 1.073478  | 3.349574  | -3.234763 |
| H | 2.870175  | 1.039663  | -4.324421 |
| H | 3.862869  | 0.772598  | -2.886294 |
| H | 3.518344  | 2.413152  | -3.429603 |
| H | 1.281950  | -0.201603 | 2.360146  |
| H | 2.268081  | 0.147394  | 4.557161  |
| H | 3.522880  | 0.372713  | 3.334371  |
| H | 2.800125  | 1.770153  | 4.131419  |
| H | -0.138710 | 0.811927  | 4.089444  |
| H | -0.616341 | 1.419880  | 2.498690  |
| H | 0.336807  | 2.433450  | 3.578891  |
| H | -2.429028 | -4.111822 | 0.634283  |
| H | -0.674212 | -4.262029 | 0.608896  |
| H | -1.432461 | -3.044657 | 1.636679  |
| H | -3.120541 | -1.639201 | 1.516877  |
| H | -4.152230 | 0.356730  | -2.905857 |
| H | -2.338008 | -1.276502 | -2.690880 |
| H | -4.922553 | -0.325650 | 2.549290  |
| H | -6.748505 | 1.313584  | 2.336884  |
| H | -7.274816 | 2.324461  | 0.133770  |
| H | -5.975466 | 1.698682  | -1.864734 |

B3LYP energy = -1315.78970624 a.u.

(5S,1'S)-**3a**, Conf. E

|   |           |           |           |
|---|-----------|-----------|-----------|
| C | 1.107044  | -2.457558 | -1.012097 |
| C | 2.214363  | -1.401524 | -0.727235 |
| N | 1.398225  | -0.266724 | -0.148097 |
| C | 0.117937  | -0.593603 | -0.157589 |
| N | -0.144778 | -1.800907 | -0.586270 |
| C | 3.415721  | -1.940479 | 0.102064  |
| C | 4.049096  | -3.066500 | -0.743723 |
| C | 3.001658  | -2.504779 | 1.468695  |
| C | 4.476061  | -0.841824 | 0.290664  |
| C | -1.486928 | -2.414835 | -0.798283 |
| C | 1.840015  | 1.102080  | 0.061798  |
| C | 1.924528  | 1.608108  | 1.374069  |
| C | 2.397546  | 2.911773  | 1.533566  |

|   |           |           |           |
|---|-----------|-----------|-----------|
| C | 2.765318  | 3.685643  | 0.444335  |
| C | 2.622796  | 3.183530  | -0.839581 |
| C | 2.136287  | 1.895057  | -1.064562 |
| C | 1.891087  | 1.450629  | -2.502941 |
| C | 0.822079  | 2.332217  | -3.174533 |
| C | 3.182392  | 1.425264  | -3.337278 |
| C | 1.475906  | 0.837004  | 2.609632  |
| C | 2.563103  | 0.767281  | 3.694552  |
| C | 0.179085  | 1.435681  | 3.186338  |
| C | -1.516135 | -3.837944 | -0.234068 |
| C | -2.589347 | -1.531069 | -0.251170 |
| C | -3.406352 | -0.844617 | -1.118028 |
| C | -4.465704 | -0.027450 | -0.649528 |
| C | -4.677712 | 0.085894  | 0.758184  |
| C | -3.820683 | -0.629212 | 1.633241  |
| C | -2.810008 | -1.416527 | 1.147102  |
| C | -5.319515 | 0.679824  | -1.532616 |
| C | -6.335905 | 1.462042  | -1.044178 |
| C | -6.545758 | 1.574033  | 0.348538  |
| C | -5.735625 | 0.902180  | 1.229640  |
| H | 1.040378  | -2.717777 | -2.068302 |
| H | 1.253837  | -3.370327 | -0.441102 |
| H | 2.627096  | -1.040633 | -1.667680 |
| H | -0.652759 | 0.094958  | 0.154107  |
| H | 4.356261  | -2.702031 | -1.727111 |
| H | 3.374637  | -3.912717 | -0.887987 |
| H | 4.938657  | -3.444200 | -0.237541 |
| H | 2.283353  | -3.323068 | 1.386480  |
| H | 2.572559  | -1.739187 | 2.113123  |
| H | 3.880812  | -2.903686 | 1.977613  |
| H | 4.796732  | -0.430519 | -0.669038 |
| H | 4.118994  | -0.019324 | 0.907261  |
| H | 5.355311  | -1.265607 | 0.779022  |
| H | -1.608562 | -2.473728 | -1.883406 |
| H | 2.478295  | 3.328143  | 2.529135  |
| H | 3.142167  | 4.689580  | 0.595294  |
| H | 2.873744  | 3.811385  | -1.684690 |
| H | 1.487134  | 0.439048  | -2.493310 |
| H | 0.603238  | 1.956766  | -4.176516 |
| H | -0.107367 | 2.336027  | -2.601604 |
| H | 1.159250  | 3.365449  | -3.272676 |
| H | 2.973505  | 1.054661  | -4.342977 |
| H | 3.941461  | 0.781343  | -2.889054 |
| H | 3.611260  | 2.424357  | -3.434939 |
| H | 1.251682  | -0.186255 | 2.310712  |
| H | 2.225090  | 0.136247  | 4.519117  |
| H | 3.494496  | 0.349841  | 3.309371  |
| H | 2.784231  | 1.753370  | 4.106415  |
| H | -0.162309 | 0.843393  | 4.038005  |
| H | -0.623347 | 1.458669  | 2.446324  |
| H | 0.338537  | 2.458799  | 3.532621  |
| H | -2.503416 | -4.264056 | -0.409670 |
| H | -0.785530 | -4.478955 | -0.727654 |
| H | -1.321843 | -3.850787 | 0.838575  |
| H | -3.253522 | -0.929207 | -2.188605 |
| H | -3.981294 | -0.552066 | 2.702111  |

|   |           |           |           |
|---|-----------|-----------|-----------|
| H | -2.178225 | -1.958341 | 1.840337  |
| H | -5.159047 | 0.593067  | -2.600930 |
| H | -6.984003 | 1.997761  | -1.726447 |
| H | -7.352758 | 2.194192  | 0.718256  |
| H | -5.896940 | 0.986909  | 2.297866  |

B3LYP energy = -1315.78961438 a.u.

(5S,1'S)-**3a**, Conf. F

|   |           |           |           |
|---|-----------|-----------|-----------|
| C | -1.123193 | 2.469336  | -0.947945 |
| C | -2.238300 | 1.492084  | -0.479679 |
| N | -1.424012 | 0.262268  | -0.146266 |
| C | -0.137409 | 0.542311  | -0.250658 |
| N | 0.134230  | 1.772227  | -0.608197 |
| C | -3.159684 | 2.059060  | 0.640040  |
| C | -3.893832 | 3.272514  | 0.030189  |
| C | -2.379578 | 2.508983  | 1.884223  |
| C | -4.225878 | 1.023036  | 1.034749  |
| C | 1.479009  | 2.329733  | -0.931820 |
| C | -1.923332 | -1.095611 | -0.012161 |
| C | -1.836168 | -1.752457 | 1.231463  |
| C | -2.375327 | -3.037125 | 1.320773  |
| C | -2.971333 | -3.649291 | 0.229579  |
| C | -2.997447 | -3.002685 | -0.995910 |
| C | -2.455569 | -1.726488 | -1.154355 |
| C | -2.403638 | -1.127156 | -2.556309 |
| C | -1.528317 | -1.986562 | -3.487550 |
| C | -3.803177 | -0.923374 | -3.159848 |
| C | -1.137887 | -1.167559 | 2.453807  |
| C | -2.020945 | -1.183025 | 3.712204  |
| C | 0.190872  | -1.899345 | 2.723178  |
| C | 1.575792  | 3.784593  | -0.466164 |
| C | 2.582470  | 1.455237  | -0.373150 |
| C | 3.398810  | 0.754618  | -1.228560 |
| C | 4.465645  | -0.045364 | -0.746492 |
| C | 4.684479  | -0.125830 | 0.662370  |
| C | 3.826439  | 0.603011  | 1.525393  |
| C | 2.808850  | 1.372723  | 1.026498  |
| C | 5.319781  | -0.767247 | -1.617147 |
| C | 6.343328  | -1.532038 | -1.115881 |
| C | 6.559880  | -1.611525 | 0.277928  |
| C | 5.749202  | -0.925034 | 1.147278  |
| H | -1.148183 | 2.651813  | -2.023824 |
| H | -1.172151 | 3.424960  | -0.436279 |
| H | -2.883735 | 1.234609  | -1.316564 |
| H | 0.630344  | -0.193847 | -0.067052 |
| H | -4.458148 | 2.988148  | -0.861052 |
| H | -3.216714 | 4.084698  | -0.239523 |
| H | -4.602185 | 3.670757  | 0.758104  |
| H | -1.650065 | 3.289826  | 1.660265  |
| H | -1.855464 | 1.680518  | 2.359876  |
| H | -3.071908 | 2.921076  | 2.620277  |
| H | -4.798560 | 0.691439  | 0.165895  |
| H | -3.798398 | 0.143131  | 1.510320  |
| H | -4.926647 | 1.473236  | 1.740149  |
| H | 1.550923  | 2.313214  | -2.022849 |

|   |           |           |           |
|---|-----------|-----------|-----------|
| H | -2.326286 | -3.567646 | 2.262547  |
| H | -3.394735 | -4.641026 | 0.328755  |
| H | -3.425340 | -3.506996 | -1.852735 |
| H | -1.922493 | -0.150990 | -2.503283 |
| H | -1.438475 | -1.506228 | -4.464286 |
| H | -0.524384 | -2.120456 | -3.079916 |
| H | -1.961274 | -2.976317 | -3.642159 |
| H | -3.725345 | -0.448792 | -4.140189 |
| H | -4.431533 | -0.293845 | -2.527001 |
| H | -4.319153 | -1.876092 | -3.293525 |
| H | -0.895438 | -0.126396 | 2.244729  |
| H | -1.502250 | -0.686656 | 4.534872  |
| H | -2.968055 | -0.666575 | 3.550302  |
| H | -2.245242 | -2.201404 | 4.033772  |
| H | 0.709891  | -1.439149 | 3.566544  |
| H | 0.857374  | -1.868920 | 1.858789  |
| H | 0.016802  | -2.948867 | 2.968597  |
| H | 2.568303  | 4.162537  | -0.708984 |
| H | 0.847111  | 4.417113  | -0.973600 |
| H | 1.428613  | 3.873928  | 0.610501  |
| H | 3.239872  | 0.813772  | -2.299957 |
| H | 3.991627  | 0.549420  | 2.595033  |
| H | 2.174686  | 1.924789  | 1.709401  |
| H | 5.154226  | -0.705454 | -2.686429 |
| H | 6.991887  | -2.078765 | -1.788925 |
| H | 7.372266  | -2.218286 | 0.657941  |
| H | 5.915469  | -0.984886 | 2.216445  |

B3LYP energy = -1315.78941546 a.u.

(5*S*,1'*S*)-**3a**, Conf. G

|   |           |           |           |
|---|-----------|-----------|-----------|
| C | -0.117685 | -1.781871 | 0.651407  |
| C | 1.164620  | -1.049385 | 1.145350  |
| N | 1.497175  | -0.186184 | -0.053724 |
| C | 0.605189  | -0.396647 | -1.005567 |
| N | -0.335772 | -1.253685 | -0.708560 |
| C | 1.006355  | -0.345229 | 2.523472  |
| C | 0.677402  | -1.458903 | 3.541551  |
| C | -0.117205 | 0.701397  | 2.539501  |
| C | 2.332850  | 0.304283  | 2.953355  |
| C | -1.482750 | -1.611830 | -1.585290 |
| C | 2.754763  | 0.496376  | -0.312196 |
| C | 2.780514  | 1.904338  | -0.360567 |
| C | 4.015612  | 2.520514  | -0.568583 |
| C | 5.175350  | 1.778794  | -0.728757 |
| C | 5.115203  | 0.394166  | -0.730661 |
| C | 3.906981  | -0.279718 | -0.547600 |
| C | 3.894430  | -1.799523 | -0.678206 |
| C | 4.323972  | -2.232433 | -2.091898 |
| C | 4.761436  | -2.486214 | 0.390157  |
| C | 1.534777  | 2.776640  | -0.264031 |
| C | 1.654980  | 3.871492  | 0.808330  |
| C | 1.200739  | 3.399163  | -1.633074 |
| C | -1.404648 | -3.084691 | -1.988514 |
| C | -2.801411 | -1.190781 | -0.953241 |
| C | -3.356471 | 0.019482  | -1.299677 |

|   |           |           |           |
|---|-----------|-----------|-----------|
| C | -4.577739 | 0.466639  | -0.738446 |
| C | -5.243477 | -0.365035 | 0.213246  |
| C | -4.656904 | -1.609552 | 0.551470  |
| C | -3.475545 | -2.014124 | -0.015365 |
| C | -5.161776 | 1.709856  | -1.091086 |
| C | -6.345536 | 2.111403  | -0.525533 |
| C | -7.003220 | 1.288914  | 0.417293  |
| C | -6.465908 | 0.078873  | 0.777422  |
| H | 0.010745  | -2.862229 | 0.614721  |
| H | -0.985946 | -1.555838 | 1.265231  |
| H | 1.976483  | -1.766674 | 1.252255  |
| H | 0.662715  | 0.096321  | -1.966063 |
| H | 1.454048  | -2.227185 | 3.555348  |
| H | -0.280549 | -1.943246 | 3.342105  |
| H | 0.619488  | -1.028107 | 4.542102  |
| H | -1.088586 | 0.279137  | 2.275378  |
| H | 0.085336  | 1.530875  | 1.863810  |
| H | -0.211711 | 1.116250  | 3.544551  |
| H | 3.146109  | -0.424730 | 2.966813  |
| H | 2.627444  | 1.124502  | 2.301420  |
| H | 2.230676  | 0.703963  | 3.963882  |
| H | -1.340666 | -1.004781 | -2.479450 |
| H | 4.068559  | 3.600572  | -0.609282 |
| H | 6.123618  | 2.280700  | -0.875758 |
| H | 6.019948  | -0.175184 | -0.900384 |
| H | 2.871496  | -2.152500 | -0.551899 |
| H | 4.247208  | -3.317260 | -2.190777 |
| H | 3.692144  | -1.775866 | -2.855941 |
| H | 5.357632  | -1.951374 | -2.300111 |
| H | 4.677822  | -3.571517 | 0.303745  |
| H | 4.462622  | -2.201634 | 1.400684  |
| H | 5.814691  | -2.225043 | 0.271908  |
| H | 0.693686  | 2.143066  | 0.013930  |
| H | 0.710757  | 4.413217  | 0.893464  |
| H | 1.894667  | 3.455137  | 1.787787  |
| H | 2.428282  | 4.598462  | 0.555009  |
| H | 0.277532  | 3.978878  | -1.568733 |
| H | 1.070468  | 2.637265  | -2.405052 |
| H | 1.995945  | 4.070166  | -1.964008 |
| H | -2.218398 | -3.310759 | -2.677478 |
| H | -0.458817 | -3.290257 | -2.490693 |
| H | -1.493834 | -3.757475 | -1.136012 |
| H | -2.861119 | 0.655334  | -2.026286 |
| H | -5.161951 | -2.249293 | 1.265600  |
| H | -3.066786 | -2.979355 | 0.254294  |
| H | -4.659102 | 2.339225  | -1.816188 |
| H | -6.783471 | 3.062658  | -0.801103 |
| H | -7.937439 | 1.619370  | 0.853936  |
| H | -6.970961 | -0.554089 | 1.497675  |

B3LYP energy = -1315.78938679 a.u.

(5*S*,1'*S*)-**3a**, Conf. H

|   |          |           |           |
|---|----------|-----------|-----------|
| C | 0.120044 | -2.042480 | 0.659046  |
| C | 1.400807 | -1.253566 | 1.057559  |
| N | 1.454086 | -0.199769 | -0.029447 |

|   |           |           |           |
|---|-----------|-----------|-----------|
| C | 0.501575  | -0.441196 | -0.913129 |
| N | -0.282888 | -1.448217 | -0.629824 |
| C | 1.428994  | -0.792806 | 2.542618  |
| C | 1.346674  | -2.081800 | 3.390372  |
| C | 0.259915  | 0.129782  | 2.916835  |
| C | 2.764277  | -0.102016 | 2.868226  |
| C | -1.485813 | -1.836822 | -1.416469 |
| C | 2.588898  | 0.654441  | -0.344667 |
| C | 2.482254  | 2.044112  | -0.143327 |
| C | 3.609505  | 2.822339  | -0.412319 |
| C | 4.788156  | 2.252733  | -0.868121 |
| C | 4.849993  | 0.889160  | -1.109536 |
| C | 3.750458  | 0.061782  | -0.877346 |
| C | 3.844301  | -1.408195 | -1.274411 |
| C | 4.043656  | -1.550358 | -2.794626 |
| C | 4.945599  | -2.154722 | -0.504132 |
| C | 1.195150  | 2.735351  | 0.287722  |
| C | 1.393989  | 3.665290  | 1.495078  |
| C | 0.568692  | 3.505994  | -0.889457 |
| C | -1.504395 | -3.347550 | -1.645407 |
| C | -2.760507 | -1.277552 | -0.803823 |
| C | -3.342974 | -0.166721 | -1.368914 |
| C | -4.534481 | 0.396493  | -0.849400 |
| C | -5.137024 | -0.205562 | 0.296809  |
| C | -4.522131 | -1.350756 | 0.861510  |
| C | -3.374192 | -1.876522 | 0.326725  |
| C | -5.149378 | 1.533980  | -1.431260 |
| C | -6.303574 | 2.052454  | -0.900433 |
| C | -6.898554 | 1.457887  | 0.235280  |
| C | -6.329624 | 0.354309  | 0.819695  |
| H | 0.312676  | -3.106042 | 0.537498  |
| H | -0.683870 | -1.911882 | 1.380722  |
| H | 2.276459  | -1.885635 | 0.912768  |
| H | 0.391871  | 0.144309  | -1.815410 |
| H | 2.153237  | -2.775901 | 3.141833  |
| H | 0.395793  | -2.603862 | 3.268227  |
| H | 1.442748  | -1.826848 | 4.446785  |
| H | -0.714111 | -0.320688 | 2.717199  |
| H | 0.304846  | 1.081847  | 2.391584  |
| H | 0.298671  | 0.345164  | 3.986001  |
| H | 3.613787  | -0.746344 | 2.630918  |
| H | 2.890675  | 0.835019  | 2.329151  |
| H | 2.806448  | 0.120970  | 3.935834  |
| H | -1.345553 | -1.348767 | -2.381431 |
| H | 3.561976  | 3.893214  | -0.264660 |
| H | 5.653423  | 2.876056  | -1.056637 |
| H | 5.762178  | 0.461779  | -1.505458 |
| H | 2.896770  | -1.895398 | -1.044727 |
| H | 4.040934  | -2.605472 | -3.076438 |
| H | 3.247731  | -1.047503 | -3.347817 |
| H | 4.995088  | -1.122029 | -3.114425 |
| H | 4.948922  | -3.211074 | -0.780352 |
| H | 4.800505  | -2.086447 | 0.575647  |
| H | 5.933387  | -1.749967 | -0.731899 |
| H | 0.481105  | 1.967428  | 0.581920  |
| H | 0.430976  | 4.065576  | 1.818465  |

|   |           |           |           |
|---|-----------|-----------|-----------|
| H | 1.843128  | 3.141561  | 2.340308  |
| H | 2.035144  | 4.513757  | 1.249257  |
| H | -0.381794 | 3.949539  | -0.585603 |
| H | 0.380093  | 2.854176  | -1.744948 |
| H | 1.223443  | 4.312329  | -1.226319 |
| H | -2.335094 | -3.594042 | -2.306034 |
| H | -0.577865 | -3.676149 | -2.117776 |
| H | -1.639884 | -3.908145 | -0.720560 |
| H | -2.892966 | 0.294375  | -2.241889 |
| H | -4.980200 | -1.819157 | 1.724687  |
| H | -2.950513 | -2.768007 | 0.771418  |
| H | -4.695650 | 1.988302  | -2.304445 |
| H | -6.766207 | 2.921120  | -1.352078 |
| H | -7.810107 | 1.878079  | 0.641527  |
| H | -6.788332 | -0.104252 | 1.687866  |

B3LYP energy = -1315.78916452 a.u.

(5*S*,1'*R*)-**3b**, Conf. A

|   |           |           |           |
|---|-----------|-----------|-----------|
| C | 0.362392  | 1.390244  | 0.822783  |
| C | -1.012728 | 0.827693  | 1.282487  |
| N | -1.532247 | 0.225420  | -0.007748 |
| C | -0.676085 | 0.472655  | -0.984489 |
| N | 0.408866  | 1.106258  | -0.623580 |
| C | -0.944004 | -0.078371 | 2.544084  |
| C | -0.357543 | 0.798610  | 3.671901  |
| C | -0.053554 | -1.314091 | 2.353513  |
| C | -2.356565 | -0.511472 | 2.972702  |
| C | 1.585286  | 1.465593  | -1.447657 |
| C | -2.895124 | -0.204348 | -0.279074 |
| C | -3.910825 | 0.770732  | -0.335335 |
| C | -5.219419 | 0.331017  | -0.538983 |
| C | -5.507262 | -1.012075 | -0.724892 |
| C | -4.481538 | -1.943911 | -0.735604 |
| C | -3.154550 | -1.568375 | -0.518012 |
| C | -2.070075 | -2.636261 | -0.601411 |
| C | -2.326595 | -3.813894 | 0.353070  |
| C | -1.906536 | -3.145420 | -2.045716 |
| C | -3.649298 | 2.271825  | -0.258101 |
| C | -4.020474 | 2.958900  | -1.585030 |
| C | -4.375954 | 2.935245  | 0.923200  |
| C | 1.296576  | 1.329435  | -2.941478 |
| C | 2.808343  | 0.677043  | -1.006699 |
| C | 3.943565  | 1.336923  | -0.603674 |
| C | 5.115249  | 0.631313  | -0.228956 |
| C | 5.101779  | -0.796146 | -0.265511 |
| C | 3.914550  | -1.453695 | -0.678131 |
| C | 2.802063  | -0.740768 | -1.039659 |
| C | 6.296663  | 1.296446  | 0.184234  |
| C | 7.412543  | 0.581824  | 0.542209  |
| C | 7.399301  | -0.830424 | 0.505126  |
| C | 6.270064  | -1.503942 | 0.110925  |
| H | 0.450944  | 2.464176  | 0.983140  |
| H | 1.201500  | 0.897123  | 1.309037  |
| H | -1.680426 | 1.652012  | 1.530107  |

|                                                 |           |           |           |   |           |           |           |
|-------------------------------------------------|-----------|-----------|-----------|---|-----------|-----------|-----------|
| H                                               | -0.878797 | 0.184157  | -2.004662 | C | 5.106413  | 0.203663  | -0.595449 |
| H                                               | -0.950423 | 1.703694  | 3.824304  | C | 3.895712  | -0.435806 | -0.325930 |
| H                                               | 0.675013  | 1.095100  | 3.478634  | C | 3.902342  | -1.944468 | -0.100202 |
| H                                               | -0.363653 | 0.236232  | 4.606658  | C | 4.402102  | -2.684673 | -1.354591 |
| H                                               | 0.968226  | -1.056386 | 2.068446  | C | 4.723302  | -2.348953 | 1.135156  |
| H                                               | -0.453748 | -1.993598 | 1.603491  | C | 1.483836  | 2.552893  | -0.885385 |
| H                                               | 0.006686  | -1.865532 | 3.293531  | C | 1.530538  | 3.857818  | -0.073997 |
| H                                               | -3.001740 | 0.353511  | 3.141863  | C | 1.226661  | 2.854292  | -2.374144 |
| H                                               | -2.838271 | -1.152050 | 2.236227  | C | -1.247217 | -1.969898 | -2.738223 |
| H                                               | -2.298026 | -1.068035 | 3.909728  | C | -2.800310 | -1.481602 | -0.793872 |
| H                                               | 1.767852  | 2.520024  | -1.228884 | C | -2.988416 | -0.126977 | -0.654052 |
| H                                               | -6.023342 | 1.054822  | -0.575114 | C | -4.252279 | 0.408675  | -0.302538 |
| H                                               | -6.530142 | -1.330282 | -0.883518 | C | -5.348468 | -0.484276 | -0.094433 |
| H                                               | -4.714644 | -2.984592 | -0.919028 | C | -5.127491 | -1.875691 | -0.244204 |
| H                                               | -1.122885 | -2.182634 | -0.312118 | C | -3.889969 | -2.360643 | -0.580557 |
| H                                               | -1.482675 | -4.506373 | 0.325503  | C | -4.466284 | 1.802767  | -0.151407 |
| H                                               | -2.457179 | -3.481314 | 1.383621  | C | -5.703862 | 2.288580  | 0.186851  |
| H                                               | -3.219019 | -4.373645 | 0.067673  | C | -6.787648 | 1.404834  | 0.392890  |
| H                                               | -1.089901 | -3.868461 | -2.099258 | C | -6.613791 | 0.050858  | 0.256164  |
| H                                               | -1.687647 | -2.334097 | -2.742742 | H | -0.054300 | -2.748824 | 1.177702  |
| H                                               | -2.814961 | -3.641335 | -2.393390 | H | -1.083793 | -1.346647 | 1.490699  |
| H                                               | -2.580833 | 2.435544  | -0.119554 | H | 1.877312  | -1.510734 | 1.662428  |
| H                                               | -3.754604 | 4.017415  | -1.546255 | H | 0.734140  | -0.453629 | -1.957649 |
| H                                               | -3.493889 | 2.505017  | -2.426838 | H | -1.234902 | 0.683176  | 2.063159  |
| H                                               | -5.091365 | 2.891285  | -1.784133 | H | -0.042318 | 1.807473  | 1.405817  |
| H                                               | -4.126057 | 3.997102  | 0.970323  | H | -0.404134 | 1.806022  | 3.125303  |
| H                                               | -4.101310 | 2.479411  | 1.876164  | H | 2.471391  | 1.557596  | 2.050912  |
| H                                               | -5.459403 | 2.855144  | 0.817977  | H | 2.970028  | 0.204891  | 3.068183  |
| H                                               | 2.158701  | 1.705379  | -3.490417 | H | 2.005503  | 1.512848  | 3.747388  |
| H                                               | 0.426692  | 1.919220  | -3.235167 | H | -0.475808 | -1.227548 | 3.629587  |
| H                                               | 1.147711  | 0.291361  | -3.241675 | H | 1.244460  | -1.439442 | 3.985136  |
| H                                               | 3.960725  | 2.421246  | -0.571293 | H | 0.365629  | -0.052882 | 4.629200  |
| H                                               | 3.899714  | -2.536941 | -0.706592 | H | -1.460180 | -3.127190 | -0.952953 |
| H                                               | 1.909505  | -1.270857 | -1.351327 | H | 4.026388  | 3.327174  | -1.280466 |
| H                                               | 6.306532  | 2.379896  | 0.211531  | H | 6.104420  | 2.027253  | -1.120442 |
| H                                               | 8.310977  | 1.099266  | 0.854797  | H | 6.024789  | -0.368921 | -0.577328 |
| H                                               | 8.287735  | -1.380339 | 0.789552  | H | 2.878216  | -2.278785 | 0.062334  |
| H                                               | 6.258618  | -2.587232 | 0.082015  | H | 4.328194  | -3.764065 | -1.205830 |
| B3LYP energy = -1315.79097302 a.u.              |           |           |           | H | 3.812297  | -2.420794 | -2.234676 |
| (5 <i>S</i> ,1' <i>R</i> )- <b>3b</b> , Conf. B |           |           |           | H | 5.445934  | -2.449042 | -1.568484 |
| C                                               | -0.185422 | -1.685118 | 0.979979  | H | 4.673142  | -3.429570 | 1.283423  |
| C                                               | 1.070760  | -0.846810 | 1.355941  | H | 4.355987  | -1.864653 | 2.041776  |
| N                                               | 1.462286  | -0.281446 | 0.006313  | H | 5.774471  | -2.078745 | 1.018332  |
| C                                               | 0.618113  | -0.709724 | -0.915632 | H | 0.632492  | 1.977540  | -0.523037 |
| N                                               | -0.344137 | -1.475424 | -0.471897 | H | 0.580759  | 4.388234  | -0.167535 |
| C                                               | 0.848967  | 0.152459  | 2.528080  | H | 1.709400  | 3.670269  | 0.985627  |
| C                                               | -0.273269 | 1.163510  | 2.252995  | H | 2.315216  | 4.526062  | -0.432268 |
| C                                               | 2.153541  | 0.899171  | 2.857045  | H | 0.295928  | 3.413753  | -2.490025 |
| C                                               | 0.471665  | -0.701302 | 3.758205  | H | 1.149563  | 1.940952  | -2.967982 |
| C                                               | -1.463975 | -2.069814 | -1.228134 | H | 2.032914  | 3.455501  | -2.799009 |
| C                                               | 2.725408  | 0.348488  | -0.340283 | H | -2.065810 | -2.486459 | -3.237260 |
| C                                               | 2.740484  | 1.707092  | -0.713472 | H | -0.312887 | -2.445781 | -3.042132 |
| C                                               | 3.980140  | 2.285022  | -0.992910 | H | -1.259104 | -0.934346 | -3.081883 |
| C                                               | 5.153725  | 1.552041  | -0.912977 | H | -2.165705 | 0.563853  | -0.807208 |
|                                                 |           |           |           | H | -5.953229 | -2.558731 | -0.083449 |
|                                                 |           |           |           | H | -3.739659 | -3.429249 | -0.684286 |

|   |           |           |           |
|---|-----------|-----------|-----------|
| H | -3.636832 | 2.482105  | -0.310042 |
| H | -5.856424 | 3.355004  | 0.297235  |
| H | -7.758451 | 1.803663  | 0.659438  |
| H | -7.443939 | -0.627702 | 0.413877  |

B3LYP energy = -1315.79007995 a.u.

(5*S*,1'*R*)-**3b**, Conf. C

|   |           |           |           |
|---|-----------|-----------|-----------|
| C | 0.462744  | -1.109459 | 0.863629  |
| C | -0.921549 | -0.546111 | 1.301645  |
| N | -1.536726 | -0.185957 | -0.035506 |
| C | -0.666520 | -0.436392 | -0.997640 |
| N | 0.465630  | -0.957119 | -0.603307 |
| C | -1.723347 | -1.484227 | 2.247619  |
| C | -0.849923 | -1.667704 | 3.508395  |
| C | -2.016120 | -2.859194 | 1.630706  |
| C | -3.038669 | -0.814391 | 2.681628  |
| C | 1.588244  | -1.366201 | -1.484474 |
| C | -2.714793 | 0.637657  | -0.256403 |
| C | -3.860909 | 0.061737  | -0.839510 |
| C | -4.985314 | 0.875177  | -0.991026 |
| C | -4.978318 | 2.200910  | -0.587409 |
| C | -3.821851 | 2.757626  | -0.064140 |
| C | -2.658879 | 2.002177  | 0.090874  |
| C | -1.389032 | 2.708994  | 0.554488  |
| C | -0.953139 | 3.770823  | -0.471963 |
| C | -1.537067 | 3.328072  | 1.954060  |
| C | -3.919319 | -1.369555 | -1.360051 |
| C | -5.091111 | -2.168229 | -0.765871 |
| C | -3.982235 | -1.390824 | -2.899426 |
| C | 1.719455  | -2.887306 | -1.509139 |
| C | 2.844119  | -0.593750 | -1.101488 |
| C | 3.950855  | -1.196117 | -0.555094 |
| C | 5.108213  | -0.448027 | -0.215531 |
| C | 5.117278  | 0.960491  | -0.446823 |
| C | 3.963627  | 1.559887  | -1.014633 |
| C | 2.865059  | 0.807391  | -1.332216 |
| C | 6.257736  | -1.058252 | 0.345872  |
| C | 7.362940  | -0.308793 | 0.664065  |
| C | 7.371020  | 1.085070  | 0.435043  |
| C | 6.273739  | 1.705600  | -0.108657 |
| H | 1.295474  | -0.555044 | 1.291706  |
| H | 0.579410  | -2.160554 | 1.118151  |
| H | -0.780822 | 0.388868  | 1.841671  |
| H | -0.870905 | -0.210883 | -2.034872 |
| H | -0.609968 | -0.707017 | 3.970508  |
| H | 0.086445  | -2.188604 | 3.299256  |
| H | -1.394960 | -2.262662 | 4.242631  |
| H | -1.108448 | -3.387599 | 1.332763  |
| H | -2.666405 | -2.785582 | 0.760835  |
| H | -2.523266 | -3.486156 | 2.366036  |
| H | -2.854327 | 0.159702  | 3.140253  |
| H | -3.727949 | -0.670767 | 1.851583  |
| H | -3.538024 | -1.439666 | 3.423966  |
| H | 1.287618  | -1.036674 | -2.481363 |
| H | -5.881551 | 0.462060  | -1.434977 |

|   |           |           |           |
|---|-----------|-----------|-----------|
| H | -5.868366 | 2.807059  | -0.701740 |
| H | -3.814015 | 3.804953  | 0.208878  |
| H | -0.578520 | 1.982666  | 0.601383  |
| H | -0.001910 | 4.214652  | -0.170948 |
| H | -0.827558 | 3.333550  | -1.464494 |
| H | -1.686559 | 4.575121  | -0.551731 |
| H | -0.593400 | 3.778908  | 2.267865  |
| H | -1.821293 | 2.582843  | 2.699315  |
| H | -2.297273 | 4.111282  | 1.963117  |
| H | -3.000588 | -1.876990 | -1.068256 |
| H | -5.046171 | -3.204730 | -1.106525 |
| H | -5.069111 | -2.169870 | 0.324780  |
| H | -6.053751 | -1.761283 | -1.079761 |
| H | -3.959142 | -2.420295 | -3.262961 |
| H | -3.145703 | -0.852378 | -3.349949 |
| H | -4.903052 | -0.928731 | -3.260890 |
| H | 2.498133  | -3.177259 | -2.214154 |
| H | 0.780514  | -3.334934 | -1.834585 |
| H | 1.976041  | -3.300086 | -0.533393 |
| H | 3.970001  | -2.263512 | -0.375882 |
| H | 3.966254  | 2.626854  | -1.204359 |
| H | 1.999721  | 1.287325  | -1.775381 |
| H | 6.252561  | -2.128138 | 0.519356  |
| H | 8.236435  | -0.784868 | 1.091817  |
| H | 8.250582  | 1.662985  | 0.690019  |
| H | 6.279908  | 2.774512  | -0.287155 |

B3LYP energy = -1315.79002238 a.u.

(5*S*,1'*R*)-**3b**, Conf. D

|   |           |           |           |
|---|-----------|-----------|-----------|
| C | 1.110978  | -2.643266 | 0.244388  |
| C | 2.221794  | -1.554568 | 0.277703  |
| N | 1.408367  | -0.295803 | 0.074296  |
| C | 0.131983  | -0.609753 | -0.059417 |
| N | -0.137247 | -1.888352 | 0.014038  |
| C | 3.151927  | -1.628077 | 1.522628  |
| C | 3.837785  | -3.010845 | 1.466799  |
| C | 2.392036  | -1.493826 | 2.849946  |
| C | 4.250816  | -0.554611 | 1.440958  |
| C | -1.484740 | -2.519569 | 0.112074  |
| C | 1.922572  | 1.019212  | -0.272413 |
| C | 2.529884  | 1.194482  | -1.531249 |
| C | 3.084806  | 2.443148  | -1.814234 |
| C | 3.002605  | 3.489159  | -0.908620 |
| C | 2.332387  | 3.313384  | 0.291876  |
| C | 1.772453  | 2.082840  | 0.639297  |
| C | 0.979838  | 1.977465  | 1.936278  |
| C | 1.774740  | 2.451924  | 3.163207  |
| C | -0.349169 | 2.748448  | 1.822544  |
| C | 2.549201  | 0.123360  | -2.617019 |
| C | 1.723767  | 0.570092  | -3.838030 |
| C | 3.976579  | -0.266560 | -3.034900 |
| C | -1.531037 | -3.792942 | -0.735799 |
| C | -2.581903 | -1.532405 | -0.230959 |
| C | -3.420321 | -1.072066 | 0.756816  |
| C | -4.480196 | -0.174552 | 0.471412  |



|                                    |           |           |           |   |           |           |           |
|------------------------------------|-----------|-----------|-----------|---|-----------|-----------|-----------|
| C                                  | -4.668646 | 0.263407  | -0.874784 | N | 0.403800  | 1.241886  | 0.486363  |
| C                                  | -3.788142 | -0.221239 | -1.875748 | C | -2.248541 | 1.833890  | -1.872055 |
| C                                  | -2.778624 | -1.094901 | -1.567459 | C | -2.594811 | 3.000563  | -0.936335 |
| C                                  | -5.356914 | 0.301445  | 1.478308  | C | -3.523867 | 1.047211  | -2.219918 |
| C                                  | -6.372428 | 1.170435  | 1.166514  | C | -1.670069 | 2.394546  | -3.189579 |
| C                                  | -6.558727 | 1.603753  | -0.165211 | C | 1.548064  | 1.712504  | 1.311779  |
| C                                  | -5.726696 | 1.160782  | -1.162999 | C | -2.456437 | -0.888634 | 0.206333  |
| H                                  | 1.265905  | -3.363287 | -0.556083 | C | -2.247922 | -2.125117 | -0.436019 |
| H                                  | 1.030421  | -3.185179 | 1.185580  | C | -3.233754 | -3.102727 | -0.293668 |
| H                                  | 2.861407  | -1.661025 | -0.596877 | C | -4.356215 | -2.885617 | 0.489776  |
| H                                  | -0.629326 | 0.135870  | -0.231684 | C | -4.501663 | -1.687745 | 1.171549  |
| H                                  | 4.383029  | -3.148275 | 0.530019  | C | -3.561038 | -0.663355 | 1.051831  |
| H                                  | 3.130767  | -3.835808 | 1.574173  | C | -3.750087 | 0.602283  | 1.879651  |
| H                                  | 4.556970  | -3.092265 | 2.283110  | C | -5.127514 | 1.251849  | 1.668396  |
| H                                  | 1.620447  | -2.256739 | 2.971735  | C | -3.515717 | 0.317336  | 3.375530  |
| H                                  | 1.923662  | -0.516629 | 2.955447  | C | -0.982691 | -2.472865 | -1.213828 |
| H                                  | 3.089685  | -1.611987 | 3.680784  | C | -0.226568 | -3.633558 | -0.541000 |
| H                                  | 4.818834  | -0.637643 | 0.511840  | C | -1.269002 | -2.794803 | -2.690101 |
| H                                  | 3.851988  | 0.456201  | 1.502554  | C | 1.478757  | 3.226445  | 1.516207  |
| H                                  | 4.950396  | -0.686182 | 2.268446  | C | 2.866212  | 1.204886  | 0.747312  |
| H                                  | -1.602111 | -2.801731 | 1.162029  | C | 3.429346  | 0.066318  | 1.275981  |
| H                                  | 3.570861  | 2.604750  | -2.767726 | C | 4.653259  | -0.454458 | 0.788811  |
| H                                  | 3.440081  | 4.450160  | -1.149137 | C | 5.310713  | 0.221547  | -0.283996 |
| H                                  | 2.238656  | 4.149458  | 0.972350  | C | 4.715003  | 1.394113  | -0.810965 |
| H                                  | 0.728898  | 0.929943  | 2.098359  | C | 3.533102  | 1.875935  | -0.309491 |
| H                                  | 1.192971  | 2.282003  | 4.071528  | C | 5.247575  | -1.622142 | 1.331441  |
| H                                  | 2.721211  | 1.918568  | 3.263420  | C | 6.432836  | -2.099662 | 0.831767  |
| H                                  | 1.996152  | 3.519276  | 3.111430  | C | 7.081629  | -1.432107 | -0.231833 |
| H                                  | -0.942752 | 2.612651  | 2.729036  | C | 6.534592  | -0.297543 | -0.776151 |
| H                                  | -0.945208 | 2.409054  | 0.972618  | H | 1.012840  | 1.213171  | -1.529053 |
| H                                  | -0.172821 | 3.818262  | 1.694263  | H | 0.127339  | 2.663175  | -1.043694 |
| H                                  | 2.062762  | -0.772289 | -2.232462 | H | -0.987744 | 0.114665  | -2.037168 |
| H                                  | 1.681236  | -0.234139 | -4.575636 | H | -0.551232 | 0.020115  | 1.895846  |
| H                                  | 0.701285  | 0.827029  | -3.553651 | H | -1.729897 | 3.627393  | -0.710643 |
| H                                  | 2.165922  | 1.442642  | -4.322109 | H | -3.021240 | 2.657665  | 0.005260  |
| H                                  | 3.945658  | -1.064360 | -3.779849 | H | -3.336335 | 3.642305  | -1.415192 |
| H                                  | 4.567731  | -0.616887 | -2.186446 | H | -4.026828 | 0.654890  | -1.338439 |
| H                                  | 4.504692  | 0.579457  | -3.478366 | H | -3.305728 | 0.208904  | -2.885041 |
| H                                  | -2.522905 | -4.235270 | -0.649532 | H | -4.225805 | 1.704149  | -2.736464 |
| H                                  | -0.806885 | -4.530182 | -0.388567 | H | -0.783142 | 3.010983  | -3.032177 |
| H                                  | -1.338281 | -3.583317 | -1.788193 | H | -1.409302 | 1.592921  | -3.884511 |
| H                                  | -3.283700 | -1.402016 | 1.781146  | H | -2.418334 | 3.023221  | -3.674343 |
| H                                  | -3.929601 | 0.104728  | -2.899510 | H | 1.397128  | 1.230992  | 2.278463  |
| H                                  | -2.128147 | -1.455376 | -2.354823 | H | -3.108931 | -4.057817 | -0.787541 |
| H                                  | -5.215375 | -0.033153 | 2.499357  | H | -5.107276 | -3.659613 | 0.587392  |
| H                                  | -7.038232 | 1.527671  | 1.942144  | H | -5.362611 | -1.543787 | 1.811064  |
| H                                  | -7.365194 | 2.288647  | -0.395629 | H | -3.000657 | 1.329152  | 1.569188  |
| H                                  | -5.870584 | 1.491509  | -2.184872 | H | -5.182771 | 2.192498  | 2.219990  |
| B3LYP energy = -1315.78985693 a.u. |           |           |           | H | -5.317494 | 1.465996  | 0.615700  |
| (5S,1'R)-3b, Conf. E               |           |           |           | H | -5.933644 | 0.611663  | 2.030544  |
| C                                  | 0.181786  | 1.583277  | -0.931266 | H | -3.595864 | 1.241448  | 3.951936  |
| C                                  | -1.163511 | 0.883480  | -1.287356 | H | -2.529310 | -0.113442 | 3.560969  |
| N                                  | -1.479984 | 0.169446  | 0.010512  | H | -4.257654 | -0.384016 | 3.762424  |
| C                                  | -0.542140 | 0.440972  | 0.900302  | H | -0.310049 | -1.616373 | -1.187046 |
|                                    |           |           |           | H | 0.715836  | -3.816844 | -1.061304 |
|                                    |           |           |           | H | -0.000673 | -3.409646 | 0.503374  |

|   |           |           |           |
|---|-----------|-----------|-----------|
| H | -0.806550 | -4.557741 | -0.567350 |
| H | -0.334551 | -2.987854 | -3.220962 |
| H | -1.782068 | -1.974138 | -3.195092 |
| H | -1.894401 | -3.684273 | -2.786725 |
| H | 2.291573  | 3.536138  | 2.173013  |
| H | 0.532553  | 3.503523  | 1.982191  |
| H | 1.576965  | 3.779177  | 0.582131  |
| H | 2.937402  | -0.452165 | 2.092405  |
| H | 5.213153  | 1.917638  | -1.618452 |
| H | 3.118668  | 2.785052  | -0.725708 |
| H | 4.752293  | -2.133045 | 2.148954  |
| H | 6.878897  | -2.992193 | 1.252492  |
| H | 8.016925  | -1.821241 | -0.614421 |
| H | 7.033876  | 0.217092  | -1.588776 |

B3LYP energy = -1315.78953337 a.u.

(5*S*,1'*R*)-**3b**, Conf. F

|   |           |           |           |
|---|-----------|-----------|-----------|
| C | -1.131666 | 2.670694  | 0.033735  |
| C | -2.213921 | 1.563249  | 0.194777  |
| N | -1.387868 | 0.310107  | -0.007306 |
| C | -0.131249 | 0.643174  | -0.245868 |
| N | 0.114930  | 1.926839  | -0.223361 |
| C | -3.055772 | 1.679512  | 1.497957  |
| C | -3.773789 | 3.045171  | 1.426890  |
| C | -2.202738 | 1.624140  | 2.773462  |
| C | -4.135119 | 0.583983  | 1.543021  |
| C | 1.429562  | 2.604447  | -0.412043 |
| C | -1.893552 | -1.030651 | -0.251638 |
| C | -2.572745 | -1.280950 | -1.460590 |
| C | -3.113651 | -2.553181 | -1.648838 |
| C | -2.949420 | -3.552357 | -0.702215 |
| C | -2.212734 | -3.302891 | 0.444655  |
| C | -1.664243 | -2.044526 | 0.699431  |
| C | -0.810968 | -1.860913 | 1.949097  |
| C | -1.550988 | -2.261324 | 3.236106  |
| C | 0.512462  | -2.640253 | 1.829053  |
| C | -2.682708 | -0.266008 | -2.593852 |
| C | -1.935604 | -0.762022 | -3.845668 |
| C | -4.141324 | 0.085544  | -2.929624 |
| C | 1.493558  | 3.256089  | -1.793729 |
| C | 2.571599  | 1.661261  | -0.076583 |
| C | 3.285031  | 0.986723  | -1.038776 |
| C | 4.341342  | 0.105056  | -0.692846 |
| C | 4.664660  | -0.083213 | 0.685193  |
| C | 3.916871  | 0.626060  | 1.659461  |
| C | 2.903853  | 1.470372  | 1.290884  |
| C | 5.087061  | -0.594756 | -1.674626 |
| C | 6.103643  | -1.441047 | -1.308834 |
| C | 6.423143  | -1.626744 | 0.054846  |
| C | 5.721028  | -0.962497 | 1.029420  |
| H | -1.346638 | 3.339775  | -0.797647 |
| H | -1.008594 | 3.269264  | 0.934625  |
| H | -2.916695 | 1.615018  | -0.635491 |
| H | 0.634689  | -0.090187 | -0.450524 |
| H | -4.386207 | 3.128667  | 0.525861  |

|   |           |           |           |
|---|-----------|-----------|-----------|
| H | -3.078960 | 3.887032  | 1.446168  |
| H | -4.435191 | 3.151728  | 2.287913  |
| H | -1.446167 | 2.410671  | 2.806566  |
| H | -1.700280 | 0.665378  | 2.888460  |
| H | -2.844472 | 1.763057  | 3.645123  |
| H | -4.763723 | 0.608156  | 0.650192  |
| H | -3.712479 | -0.415177 | 1.629600  |
| H | -4.781639 | 0.746758  | 2.407236  |
| H | 1.431670  | 3.398415  | 0.338975  |
| H | -3.652492 | -2.771214 | -2.561827 |
| H | -3.375854 | -4.533564 | -0.869908 |
| H | -2.057224 | -4.101998 | 1.157395  |
| H | -0.553753 | -0.805955 | 2.036484  |
| H | -0.933158 | -2.032068 | 4.106744  |
| H | -2.497073 | -1.729007 | 3.343313  |
| H | -1.765316 | -3.331276 | 3.259122  |
| H | 1.137582  | -2.455410 | 2.705062  |
| H | 1.079448  | -2.349274 | 0.942750  |
| H | 0.331510  | -3.715194 | 1.767391  |
| H | -2.184931 | 0.653584  | -2.288038 |
| H | -1.958892 | 0.003996  | -4.623673 |
| H | -0.891411 | -0.988513 | -3.620762 |
| H | -2.393008 | -1.664996 | -4.254191 |
| H | -4.174649 | 0.847614  | -3.710999 |
| H | -4.677008 | 0.468529  | -2.059015 |
| H | -4.685364 | -0.787143 | -3.295444 |
| H | 2.426119  | 3.811609  | -1.891628 |
| H | 0.671578  | 3.959528  | -1.927006 |
| H | 1.442062  | 2.517965  | -2.594286 |
| H | 3.062180  | 1.120941  | -2.089928 |
| H | 4.164953  | 0.498424  | 2.706517  |
| H | 2.351146  | 2.011878  | 2.050193  |
| H | 4.844449  | -0.449818 | -2.720890 |
| H | 6.668205  | -1.970123 | -2.066406 |
| H | 7.229078  | -2.296535 | 0.327588  |
| H | 5.967335  | -1.102004 | 2.075510  |

B3LYP energy = -1315.78943625 a.u.

(5*S*,1'*R*)-**3b**, Conf. G

|   |           |           |           |
|---|-----------|-----------|-----------|
| C | 1.068007  | -2.649285 | 0.213352  |
| C | 2.161687  | -1.559971 | 0.415284  |
| N | 1.410837  | -0.308509 | 0.009090  |
| C | 0.164136  | -0.621319 | -0.298360 |
| N | -0.132744 | -1.888888 | -0.178645 |
| C | 2.829009  | -1.573220 | 1.821568  |
| C | 3.513013  | -2.950072 | 1.966651  |
| C | 1.820319  | -1.387386 | 2.964024  |
| C | 3.923752  | -0.495769 | 1.909571  |
| C | -1.440388 | -2.540709 | -0.471139 |
| C | 1.993094  | 0.984118  | -0.313018 |
| C | 1.702553  | 2.100260  | 0.496562  |
| C | 2.323539  | 3.308692  | 0.175244  |
| C | 3.189991  | 3.412841  | -0.901220 |
| C | 3.417789  | 2.313282  | -1.713779 |
| C | 2.809165  | 1.084101  | -1.457498 |

|   |           |           |           |
|---|-----------|-----------|-----------|
| C | 3.006949  | -0.049713 | -2.457955 |
| C | 2.443102  | 0.331250  | -3.839318 |
| C | 4.478938  | -0.479218 | -2.569945 |
| C | 0.710438  | 2.074732  | 1.652922  |
| C | 1.313796  | 2.599643  | 2.966002  |
| C | -0.563772 | 2.861282  | 1.293203  |
| C | -1.438416 | -3.107154 | -1.891095 |
| C | -2.589631 | -1.606278 | -0.131230 |
| C | -3.363074 | -0.999553 | -1.091136 |
| C | -4.430468 | -0.132022 | -0.741096 |
| C | -4.701524 | 0.112349  | 0.638960  |
| C | -3.893468 | -0.530627 | 1.612045  |
| C | -2.872230 | -1.362533 | 1.240005  |
| C | -5.235700 | 0.500299  | -1.721197 |
| C | -6.260409 | 1.335625  | -1.351780 |
| C | -6.528254 | 1.576825  | 0.014006  |
| C | -5.767101 | 0.978286  | 0.987215  |
| H | 1.331276  | -3.358296 | -0.570809 |
| H | 0.857418  | -3.206930 | 1.123439  |
| H | 2.958752  | -1.702251 | -0.312020 |
| H | -0.552998 | 0.115579  | -0.630012 |
| H | 4.230536  | -3.127161 | 1.162085  |
| H | 2.799360  | -3.775906 | 1.975364  |
| H | 4.058610  | -2.984643 | 2.910763  |
| H | 1.046893  | -2.157958 | 2.968397  |
| H | 1.330807  | -0.415769 | 2.922680  |
| H | 2.339333  | -1.450886 | 3.921839  |
| H | 4.666661  | -0.615464 | 1.117680  |
| H | 3.522123  | 0.513362  | 1.843691  |
| H | 4.443964  | -0.584313 | 2.865051  |
| H | -1.481499 | -3.377290 | 0.230456  |
| H | 2.122972  | 4.184116  | 0.779091  |
| H | 3.670376  | 4.358233  | -1.120750 |
| H | 4.062096  | 2.416204  | -2.577363 |
| H | 2.434542  | -0.914222 | -2.123072 |
| H | 2.519839  | -0.517970 | -4.521709 |
| H | 1.393065  | 0.623260  | -3.775122 |
| H | 2.994912  | 1.163092  | -4.280658 |
| H | 4.574280  | -1.328553 | -3.249517 |
| H | 4.891745  | -0.769514 | -1.602021 |
| H | 5.097309  | 0.330027  | -2.962638 |
| H | 0.412110  | 1.041721  | 1.825482  |
| H | 0.596036  | 2.477770  | 3.779802  |
| H | 2.225233  | 2.064562  | 3.236254  |
| H | 1.556714  | 3.661491  | 2.899897  |
| H | -1.294806 | 2.785850  | 2.100771  |
| H | -1.028874 | 2.485897  | 0.379661  |
| H | -0.341028 | 3.918993  | 1.139486  |
| H | -2.360988 | -3.658978 | -2.070275 |
| H | -0.605798 | -3.797548 | -2.027054 |
| H | -1.351335 | -2.319315 | -2.640176 |
| H | -3.181641 | -1.178237 | -2.143354 |
| H | -4.102721 | -0.361823 | 2.661866  |
| H | -2.274556 | -1.852618 | 2.000609  |
| H | -5.031992 | 0.313319  | -2.769211 |
| H | -6.870429 | 1.813307  | -2.108258 |

|   |           |          |          |
|---|-----------|----------|----------|
| H | -7.340899 | 2.237082 | 0.290092 |
| H | -5.973105 | 1.161029 | 2.035342 |

B3LYP energy = -1315.78919185 a.u.

(5S,1'S)-**4a**, Conf. A

|   |           |           |           |
|---|-----------|-----------|-----------|
| C | -0.051687 | -0.564797 | 1.573417  |
| N | -0.328958 | -0.193450 | 0.131461  |
| C | 0.798325  | -0.245315 | -0.557694 |
| N | 1.848936  | -0.637871 | 0.115395  |
| C | 1.448906  | -0.965040 | 1.498506  |
| C | -0.964165 | -1.625602 | 2.252459  |
| C | -1.505096 | 0.491648  | -0.381367 |
| C | 3.210115  | -0.914583 | -0.417657 |
| C | -1.716876 | 1.834421  | -0.011947 |
| C | -2.883297 | 2.453813  | -0.462438 |
| C | -3.780113 | 1.789320  | -1.284394 |
| C | -3.510925 | 0.493517  | -1.695902 |
| C | -2.370833 | -0.185603 | -1.262348 |
| C | -0.416838 | -1.804840 | 3.685302  |
| C | -0.952002 | -2.984739 | 1.538638  |
| C | -2.407201 | -1.103094 | 2.360261  |
| C | -2.095925 | -1.580160 | -1.811165 |
| C | -0.711860 | 2.662451  | 0.782176  |
| C | -0.127705 | 3.786991  | -0.092494 |
| C | -1.310266 | 3.228724  | 2.079814  |
| C | -3.275628 | -2.543427 | -1.602203 |
| C | -1.713840 | -1.512961 | -3.301942 |
| C | 4.093309  | 0.373736  | -0.508152 |
| C | 3.107210  | -1.740694 | -1.701468 |
| C | 3.572417  | 1.369843  | -1.555270 |
| C | 4.139260  | 1.066129  | 0.865563  |
| C | 5.525711  | -0.054202 | -0.882006 |
| H | -0.155412 | 0.349809  | 2.156923  |
| H | 0.833797  | 0.027382  | -1.601536 |
| H | 2.061175  | -0.414431 | 2.208353  |
| H | 1.603154  | -2.031045 | 1.661708  |
| H | 3.662484  | -1.545899 | 0.349803  |
| H | -3.080573 | 3.480649  | -0.182556 |
| H | -4.678239 | 2.290261  | -1.623723 |
| H | -4.196687 | -0.001148 | -2.371187 |
| H | -0.386469 | -0.854426 | 4.223150  |
| H | 0.585238  | -2.237757 | 3.697331  |
| H | -1.069000 | -2.480210 | 4.240826  |
| H | -1.565759 | -3.692270 | 2.098717  |
| H | -1.361674 | -2.922804 | 0.532551  |
| H | 0.049239  | -3.414477 | 1.472768  |
| H | -2.442883 | -0.146193 | 2.886250  |
| H | -3.010951 | -1.814150 | 2.926986  |
| H | -2.876851 | -0.970715 | 1.387280  |
| H | -1.239885 | -1.992663 | -1.278814 |
| H | 0.128279  | 2.026959  | 1.060108  |
| H | -0.899819 | 4.493904  | -0.400819 |
| H | 0.631226  | 4.340966  | 0.464056  |
| H | 0.338200  | 3.383969  | -0.994031 |

|   |           |           |           |
|---|-----------|-----------|-----------|
| H | -0.543772 | 3.761055  | 2.646743  |
| H | -1.717102 | 2.439804  | 2.715200  |
| H | -2.116277 | 3.934376  | 1.871354  |
| H | -2.999834 | -3.547160 | -1.932068 |
| H | -3.571359 | -2.600866 | -0.553572 |
| H | -4.150128 | -2.237967 | -2.179046 |
| H | -1.464197 | -2.509366 | -3.672522 |
| H | -0.854403 | -0.861398 | -3.473542 |
| H | -2.541724 | -1.129622 | -3.901703 |
| H | 2.474577  | -2.613284 | -1.534494 |
| H | 4.091031  | -2.096404 | -1.999969 |
| H | 2.694830  | -1.170763 | -2.534751 |
| H | 4.236834  | 2.234807  | -1.597925 |
| H | 3.538371  | 0.938853  | -2.557144 |
| H | 2.578895  | 1.748984  | -1.305224 |
| H | 4.816774  | 1.920709  | 0.827776  |
| H | 4.505527  | 0.389473  | 1.641625  |
| H | 3.160215  | 1.443188  | 1.168135  |
| H | 6.193537  | 0.806497  | -0.818572 |
| H | 5.904717  | -0.818995 | -0.199367 |
| H | 5.589074  | -0.441590 | -1.899194 |

B3LYP energy = -1088.28161310 a.u.

(5*S*,1'*S*)-**4a**, Conf. B

|   |           |           |           |
|---|-----------|-----------|-----------|
| C | -0.016122 | -0.776079 | 1.344792  |
| N | 0.380526  | -0.143846 | 0.029090  |
| C | -0.657881 | -0.146228 | -0.787393 |
| N | -1.767954 | -0.625210 | -0.289411 |
| C | -1.518112 | -1.102313 | 1.088620  |
| C | 0.251965  | 0.025926  | 2.650796  |
| C | 1.734559  | 0.088937  | -0.447341 |
| C | -3.037643 | -0.766489 | -1.052183 |
| C | 2.552993  | -1.023848 | -0.725000 |
| C | 3.869815  | -0.777488 | -1.115492 |
| C | 4.345360  | 0.515175  | -1.270201 |
| C | 3.498906  | 1.592575  | -1.061937 |
| C | 2.177418  | 1.410885  | -0.650258 |
| C | -0.226755 | -0.871712 | 3.812645  |
| C | -0.497979 | 1.364634  | 2.702401  |
| C | 1.760112  | 0.268207  | 2.835114  |
| C | 1.280705  | 2.634334  | -0.503042 |
| C | 2.060033  | -2.467272 | -0.689595 |
| C | 2.109265  | -3.095496 | -2.094287 |
| C | 2.830760  | -3.329896 | 0.323315  |
| C | 1.877229  | 3.699953  | 0.430372  |
| C | 0.958735  | 3.242733  | -1.881202 |
| C | -4.102720 | 0.335428  | -0.729010 |
| C | -3.524903 | -2.212077 | -0.942981 |
| C | -3.457146 | 1.726604  | -0.845315 |
| C | -5.211892 | 0.229917  | -1.796148 |
| C | -4.741993 | 0.184193  | 0.661538  |
| H | 0.550628  | -1.702124 | 1.428556  |
| H | -0.585398 | 0.209459  | -1.805295 |
| H | -1.724816 | -2.168608 | 1.152182  |
| H | -2.171729 | -0.584142 | 1.783225  |

|   |           |           |           |
|---|-----------|-----------|-----------|
| H | -2.738627 | -0.593859 | -2.088414 |
| H | 4.526951  | -1.612002 | -1.323093 |
| H | 5.370612  | 0.682587  | -1.576102 |
| H | 3.870353  | 2.595957  | -1.223885 |
| H | 0.283566  | -1.837778 | 3.806327  |
| H | -1.302801 | -1.054240 | 3.787664  |
| H | -0.003030 | -0.385076 | 4.763019  |
| H | -1.580726 | 1.242766  | 2.639778  |
| H | -0.288362 | 1.862334  | 3.650809  |
| H | -0.187557 | 2.038169  | 1.904905  |
| H | 2.322359  | -0.667331 | 2.798864  |
| H | 1.937944  | 0.722721  | 3.811417  |
| H | 2.169730  | 0.936299  | 2.080110  |
| H | 0.336161  | 2.313725  | -0.065545 |
| H | 1.012266  | -2.469887 | -0.391571 |
| H | 3.134161  | -3.177885 | -2.460125 |
| H | 1.682278  | -4.100309 | -2.070393 |
| H | 1.543625  | -2.501448 | -2.814793 |
| H | 2.421026  | -4.341860 | 0.343706  |
| H | 2.772188  | -2.920227 | 1.333497  |
| H | 3.886823  | -3.405963 | 0.058186  |
| H | 1.160328  | 4.510573  | 0.575925  |
| H | 2.124088  | 3.287224  | 1.409601  |
| H | 2.786009  | 4.137385  | 0.013345  |
| H | 0.263349  | 4.077559  | -1.772216 |
| H | 0.507155  | 2.509884  | -2.553858 |
| H | 1.862272  | 3.619528  | -2.364648 |
| H | -2.733026 | -2.902200 | -1.237092 |
| H | -4.366938 | -2.372609 | -1.612801 |
| H | -3.847792 | -2.468721 | 0.065605  |
| H | -4.217291 | 2.499122  | -0.717875 |
| H | -2.693639 | 1.894255  | -0.083641 |
| H | -3.002266 | 1.875593  | -1.828414 |
| H | -5.909773 | 1.060933  | -1.681545 |
| H | -5.786306 | -0.692392 | -1.704695 |
| H | -4.800923 | 0.278906  | -2.807708 |
| H | -5.539881 | 0.920800  | 0.773869  |
| H | -5.187765 | -0.800745 | 0.806750  |
| H | -4.031489 | 0.363403  | 1.469377  |

B3LYP energy = -1088.28143897 a.u.

(5*S*,1'*R*)-**4b**, Conf. A

|   |           |           |           |
|---|-----------|-----------|-----------|
| C | 0.052710  | -0.563181 | 1.451124  |
| N | -0.355833 | -0.145739 | 0.054930  |
| C | 0.714480  | -0.102692 | -0.718011 |
| N | 1.841311  | -0.437963 | -0.143861 |
| C | 1.579913  | -0.799886 | 1.266675  |
| C | -0.701316 | -1.755291 | 2.107454  |
| C | -1.621284 | 0.450402  | -0.343748 |
| C | 3.136372  | -0.600896 | -0.860909 |
| C | -1.938090 | 1.740241  | 0.126623  |
| C | -3.186194 | 2.264789  | -0.211918 |
| C | -4.066221 | 1.564622  | -1.021979 |
| C | -3.700301 | 0.329706  | -1.533512 |

|   |           |           |           |
|---|-----------|-----------|-----------|
| C | -2.474670 | -0.256841 | -1.213932 |
| C | -0.569068 | -3.063102 | 1.313707  |
| C | -2.187818 | -1.413412 | 2.306248  |
| C | -0.071484 | -1.946459 | 3.504712  |
| C | -2.110268 | -1.586808 | -1.862627 |
| C | -0.970734 | 2.616340  | 0.916472  |
| C | -0.580634 | 3.865493  | 0.104344  |
| C | -1.525356 | 3.014136  | 2.294069  |
| C | -3.179105 | -2.669182 | -1.638450 |
| C | -1.837566 | -1.407581 | -3.368189 |
| C | 4.092114  | 0.627144  | -0.698565 |
| C | 3.739211  | -1.962829 | -0.511018 |
| C | 5.336535  | 0.373599  | -1.573086 |
| C | 3.389317  | 1.891137  | -1.222246 |
| C | 4.538776  | 0.863645  | 0.753639  |
| H | -0.106889 | 0.299959  | 2.096095  |
| H | 0.658464  | 0.197746  | -1.754543 |
| H | 2.173286  | -0.181403 | 1.934088  |
| H | 1.855810  | -1.839270 | 1.425598  |
| H | 2.855843  | -0.625986 | -1.916086 |
| H | -3.462882 | 3.247499  | 0.147031  |
| H | -5.029046 | 1.991771  | -1.273431 |
| H | -4.379350 | -0.190602 | -2.196049 |
| H | -1.080909 | -3.864792 | 1.848586  |
| H | 0.469363  | -3.375762 | 1.188142  |
| H | -1.020829 | -2.990201 | 0.326111  |
| H | -2.719577 | -1.298035 | 1.363684  |
| H | -2.672674 | -2.215738 | 2.865377  |
| H | -2.309824 | -0.491585 | 2.878930  |
| H | 0.976816  | -2.247040 | 3.454656  |
| H | -0.608330 | -2.731291 | 4.039527  |
| H | -0.137631 | -1.032957 | 4.100304  |
| H | -1.186556 | -1.944943 | -1.410267 |
| H | -0.049082 | 2.059780  | 1.081563  |
| H | 0.166617  | 4.447396  | 0.648069  |
| H | -0.160504 | 3.595240  | -0.866409 |
| H | -1.442351 | 4.511449  | -0.072599 |
| H | -0.781469 | 3.592499  | 2.845846  |
| H | -1.790228 | 2.141345  | 2.893515  |
| H | -2.419255 | 3.633045  | 2.197694  |
| H | -2.833170 | -3.622917 | -2.042142 |
| H | -3.398225 | -2.809970 | -0.579071 |
| H | -4.114318 | -2.420634 | -2.143010 |
| H | -1.528532 | -2.357299 | -3.809970 |
| H | -1.050077 | -0.675036 | -3.557135 |
| H | -2.733749 | -1.070166 | -3.892585 |
| H | 4.565212  | -2.184770 | -1.182910 |
| H | 2.995355  | -2.751458 | -0.634254 |
| H | 4.119654  | -2.004693 | 0.509822  |
| H | 5.943257  | 1.279572  | -1.615391 |
| H | 5.966137  | -0.422963 | -1.175291 |
| H | 5.059870  | 0.112374  | -2.597900 |
| H | 4.064011  | 2.746397  | -1.157655 |
| H | 2.498622  | 2.138920  | -0.642108 |
| H | 3.099091  | 1.780750  | -2.270510 |
| H | 5.303317  | 1.642563  | 0.775776  |

|   |          |           |          |
|---|----------|-----------|----------|
| H | 3.717575 | 1.207992  | 1.384369 |
| H | 4.972888 | -0.029439 | 1.205801 |

B3LYP energy = -1088.28142369 a.u.

(5*S*,1'*R*)-**4b**, Conf. B

|   |           |           |           |
|---|-----------|-----------|-----------|
| C | 0.088347  | -0.382840 | 1.636942  |
| N | 0.335490  | -0.116472 | 0.167363  |
| C | -0.764599 | -0.380100 | -0.517458 |
| N | -1.802243 | -0.724059 | 0.199836  |
| C | -1.415884 | -0.782912 | 1.624798  |
| C | 0.451453  | 0.732031  | 2.658601  |
| C | 1.632719  | -0.014344 | -0.482764 |
| C | -3.140297 | -1.144589 | -0.297313 |
| C | 2.436014  | -1.169293 | -0.561548 |
| C | 3.702935  | -1.038098 | -1.131751 |
| C | 4.139921  | 0.173999  | -1.643117 |
| C | 3.301844  | 1.277665  | -1.619351 |
| C | 2.030324  | 1.213482  | -1.046581 |
| C | 1.963334  | 1.014362  | 2.627813  |
| C | 0.106360  | 0.164660  | 4.052901  |
| C | -0.329508 | 2.035413  | 2.439214  |
| C | 1.128737  | 2.439582  | -1.121614 |
| C | 1.968820  | -2.554952 | -0.126633 |
| C | 1.845883  | -3.494934 | -1.340634 |
| C | 2.872777  | -3.168596 | 0.954715  |
| C | 1.788331  | 3.701985  | -0.544054 |
| C | 0.669498  | 2.686516  | -2.570890 |
| C | -4.083029 | 0.059666  | -0.627305 |
| C | -2.971895 | -2.177912 | -1.414893 |
| C | -5.468397 | -0.506384 | -0.995275 |
| C | -4.240182 | 0.949206  | 0.618228  |
| C | -3.561908 | 0.915575  | -1.792644 |
| H | 0.696679  | -1.247600 | 1.900013  |
| H | -0.783505 | -0.332418 | -1.595926 |
| H | -1.581731 | -1.792165 | 2.000341  |
| H | -2.033213 | -0.097105 | 2.199648  |
| H | -3.580285 | -1.654847 | 0.561534  |
| H | 4.349541  | -1.903860 | -1.195613 |
| H | 5.126933  | 0.252606  | -2.081732 |
| H | 3.639511  | 2.207695  | -2.057742 |
| H | 2.220174  | 1.708179  | 3.430258  |
| H | 2.285325  | 1.460212  | 1.688967  |
| H | 2.541706  | 0.100686  | 2.781923  |
| H | 0.636363  | -0.771078 | 4.247166  |
| H | 0.405206  | 0.880385  | 4.820169  |
| H | -0.962947 | -0.016654 | 4.177754  |
| H | -0.135147 | 2.471671  | 1.460722  |
| H | -0.030423 | 2.768765  | 3.189989  |
| H | -1.407524 | 1.898557  | 2.541772  |
| H | 0.234328  | 2.240607  | -0.532651 |
| H | 0.968697  | -2.470914 | 0.297377  |
| H | 1.451112  | -4.463486 | -1.026393 |
| H | 1.173840  | -3.082874 | -2.096702 |
| H | 2.815212  | -3.666763 | -1.811750 |
| H | 2.482659  | -4.140404 | 1.263929  |

|   |           |           |           |
|---|-----------|-----------|-----------|
| H | 2.934013  | -2.530684 | 1.838607  |
| H | 3.888235  | -3.322199 | 0.585397  |
| H | 1.076045  | 4.529557  | -0.550283 |
| H | 2.121964  | 3.551781  | 0.483587  |
| H | 2.652916  | 4.009482  | -1.134726 |
| H | -0.023653 | 3.529455  | -2.609195 |
| H | 0.164214  | 1.813263  | -2.988568 |
| H | 1.517328  | 2.919287  | -3.218188 |
| H | -3.927287 | -2.647689 | -1.638800 |
| H | -2.282585 | -2.961888 | -1.099263 |
| H | -2.594548 | -1.739508 | -2.339098 |
| H | -6.184873 | 0.311747  | -1.084880 |
| H | -5.457507 | -1.037641 | -1.947256 |
| H | -5.839234 | -1.188290 | -0.225824 |
| H | -4.953028 | 1.750509  | 0.415981  |
| H | -3.299375 | 1.421689  | 0.905516  |
| H | -4.617426 | 0.380131  | 1.471652  |
| H | -4.284390 | 1.702626  | -2.015926 |
| H | -2.619625 | 1.413278  | -1.552125 |
| H | -3.426018 | 0.334481  | -2.706382 |

B3LYP energy = -1088.28135287 a.u.

(5*R*,1'*R*)-**5a**, Conf. A

|   |           |           |           |
|---|-----------|-----------|-----------|
| C | -1.933522 | 3.577182  | 0.820611  |
| C | -1.302592 | 4.786423  | 0.537707  |
| C | -1.283886 | 5.275734  | -0.763784 |
| C | -1.903550 | 4.551597  | -1.779560 |
| C | -2.534610 | 3.346026  | -1.492676 |
| C | -2.555195 | 2.840066  | -0.188728 |
| C | -3.259180 | 1.537213  | 0.116461  |
| C | -2.567515 | 0.295428  | -0.480052 |
| N | -1.223701 | 0.087291  | 0.114586  |
| C | -0.102649 | 0.023871  | -0.557438 |
| N | 0.955596  | -0.334765 | 0.144771  |
| C | 2.308704  | -0.226145 | -0.374421 |
| C | 3.090915  | 0.881851  | 0.005897  |
| C | 2.556936  | 2.059418  | 0.814753  |
| C | 3.298903  | 2.240508  | 2.149131  |
| C | 2.604633  | 3.355918  | -0.014697 |
| C | 4.411234  | 0.927060  | -0.443774 |
| C | 4.922984  | -0.055804 | -1.276015 |
| C | 4.109669  | -1.095613 | -1.698153 |
| C | 2.787807  | -1.208658 | -1.264222 |
| C | 1.932710  | -2.343744 | -1.815593 |
| C | 1.615305  | -2.115586 | -3.305572 |
| C | 2.575898  | -3.725252 | -1.611131 |
| C | 0.551674  | -0.553155 | 1.588202  |
| C | 0.903244  | -1.918561 | 2.246850  |
| C | 2.427706  | -2.119433 | 2.303170  |
| C | 0.246437  | -3.115295 | 1.543572  |
| C | 0.386103  | -1.837043 | 3.699998  |
| C | -0.974328 | -0.248086 | 1.529466  |
| C | -3.388556 | -0.984848 | -0.397524 |
| C | -4.203117 | -1.282388 | 0.697080  |

|   |           |           |           |
|---|-----------|-----------|-----------|
| C | -4.923810 | -2.472819 | 0.738828  |
| C | -4.842968 | -3.378307 | -0.313889 |
| C | -4.039655 | -3.087544 | -1.412668 |
| C | -3.318232 | -1.899683 | -1.451313 |
| H | -1.958430 | 3.215629  | 1.842647  |
| H | -0.834070 | 5.348653  | 1.336141  |
| H | -0.798424 | 6.217980  | -0.985170 |
| H | -1.905581 | 4.932050  | -2.793684 |
| H | -3.032553 | 2.803928  | -2.289445 |
| H | -3.375347 | 1.425040  | 1.195191  |
| H | -4.268692 | 1.555252  | -0.299956 |
| H | -2.372643 | 0.496153  | -1.533850 |
| H | -0.043086 | 0.258176  | -1.610792 |
| H | 1.505880  | 1.881558  | 1.040636  |
| H | 2.857088  | 3.061476  | 2.717601  |
| H | 3.256486  | 1.340288  | 2.764665  |
| H | 4.351376  | 2.479769  | 1.985965  |
| H | 2.143321  | 4.173539  | 0.542372  |
| H | 2.066553  | 3.244453  | -0.957788 |
| H | 3.631348  | 3.645484  | -0.245272 |
| H | 5.041726  | 1.758109  | -0.155248 |
| H | 5.950040  | 0.000695  | -1.614600 |
| H | 4.508735  | -1.835886 | -2.379061 |
| H | 0.983091  | -2.348359 | -1.281948 |
| H | 0.959816  | -2.906298 | -3.676629 |
| H | 1.120261  | -1.156880 | -3.474500 |
| H | 2.526315  | -2.125611 | -3.907072 |
| H | 1.890192  | -4.507393 | -1.943290 |
| H | 2.815588  | -3.909326 | -0.562990 |
| H | 3.496173  | -3.828904 | -2.188158 |
| H | 1.055568  | 0.214125  | 2.173626  |
| H | 2.922355  | -1.281657 | 2.799017  |
| H | 2.653243  | -3.021031 | 2.875521  |
| H | 2.871395  | -2.235958 | 1.316320  |
| H | 0.601492  | -3.232886 | 0.521239  |
| H | 0.493551  | -4.031749 | 2.082265  |
| H | -0.842646 | -3.043997 | 1.517632  |
| H | -0.700996 | -1.752691 | 3.755365  |
| H | 0.822211  | -0.987830 | 4.231662  |
| H | 0.667844  | -2.744209 | 4.236265  |
| H | -1.580264 | -1.107278 | 1.806723  |
| H | -1.248970 | 0.591555  | 2.165003  |
| H | -4.294704 | -0.587034 | 1.521597  |
| H | -5.553433 | -2.687733 | 1.593164  |
| H | -5.408235 | -4.301250 | -0.282079 |
| H | -3.979832 | -3.781263 | -2.241978 |
| H | -2.701991 | -1.678365 | -2.315701 |

B3LYP energy = -1393.22259218 a.u.

(5*R*,1'*R*)-**5a**, Conf. B

|   |          |           |           |
|---|----------|-----------|-----------|
| C | 2.551156 | -3.336270 | -1.480792 |
| C | 1.916677 | -4.542548 | -1.756999 |
| C | 1.297717 | -5.257314 | -0.734268 |
| C | 1.321180 | -4.758409 | 0.563558  |
| C | 1.955926 | -3.548753 | 0.835788  |

|   |           |           |           |                                                 |           |           |           |
|---|-----------|-----------|-----------|-------------------------------------------------|-----------|-----------|-----------|
| C | 2.576140  | -2.820417 | -0.180898 | H                                               | -1.027474 | -0.356380 | 2.125406  |
| C | 3.280703  | -1.514935 | 0.110984  | H                                               | -2.962867 | 1.004162  | 2.873946  |
| C | 2.578460  | -0.276582 | -0.481471 | H                                               | -2.777939 | 2.746992  | 3.044405  |
| N | 1.232457  | -0.081531 | 0.112650  | H                                               | -2.969698 | 2.039756  | 1.444188  |
| C | 0.115662  | -0.004001 | -0.565262 | H                                               | -0.758369 | 3.214097  | 0.714220  |
| N | -0.950120 | 0.326986  | 0.138939  | H                                               | -0.689554 | 3.909064  | 2.326117  |
| C | -2.295499 | 0.250483  | -0.405973 | H                                               | 0.696864  | 3.037915  | 1.696394  |
| C | -3.091453 | -0.868865 | -0.094131 | H                                               | 0.640809  | 1.588113  | 3.833086  |
| C | -2.579146 | -2.089918 | 0.662311  | H                                               | -0.836809 | 0.715052  | 4.265208  |
| C | -3.354757 | -2.342565 | 1.965612  | H                                               | -0.773896 | 2.473105  | 4.385007  |
| C | -2.605653 | -3.338617 | -0.238168 | H                                               | 1.538879  | 1.142946  | 1.790379  |
| C | -4.404285 | -0.880895 | -0.567391 | H                                               | 1.299913  | -0.567600 | 2.169044  |
| C | -4.895367 | 0.146922  | -1.356797 | H                                               | 4.217257  | 0.657963  | 1.568707  |
| C | -4.068015 | 1.200236  | -1.713208 | H                                               | 5.475168  | 2.759479  | 1.638816  |
| C | -2.752522 | 1.280008  | -1.253526 | H                                               | 5.409163  | 4.325047  | -0.280830 |
| C | -1.876312 | 2.428193  | -1.739810 | H                                               | 4.059634  | 3.758051  | -2.282905 |
| C | -1.524509 | 2.249111  | -3.228948 | H                                               | 2.782669  | 1.653318  | -2.356309 |
| C | -2.513638 | 3.807128  | -1.502738 | B3LYP energy = -1393.22257293 a.u.              |           |           |           |
| C | -0.561915 | 0.474398  | 1.596341  | (5 <i>R</i> ,1' <i>R</i> )- <b>5a</b> , Conf. C |           |           |           |
| C | -0.981244 | 1.771056  | 2.346421  | C                                               | -4.351980 | -2.482793 | 0.273196  |
| C | -2.513706 | 1.890690  | 2.421264  | C                                               | -5.693704 | -2.848259 | 0.296464  |
| C | -0.394071 | 3.046781  | 1.725988  | C                                               | -6.589717 | -2.270449 | -0.599011 |
| C | -0.449628 | 1.618991  | 3.788878  | C                                               | -6.134267 | -1.329048 | -1.516483 |
| C | 0.977068  | 0.249155  | 1.527380  | C                                               | -4.791056 | -0.964085 | -1.536092 |
| C | 3.392795  | 1.007161  | -0.396605 | C                                               | -3.885210 | -1.533695 | -0.640466 |
| C | 4.161820  | 1.331932  | 0.723264  | C                                               | -2.425119 | -1.138243 | -0.647982 |
| C | 4.880865  | 2.523087  | 0.765069  | C                                               | -2.081397 | -0.137453 | 0.476449  |
| C | 4.844242  | 3.401898  | -0.312638 | N                                               | -0.618422 | 0.018373  | 0.628797  |
| C | 4.085463  | 3.084605  | -1.435352 | C                                               | 0.332691  | -0.332601 | -0.197075 |
| C | 3.364767  | 1.896050  | -1.474120 | N                                               | 1.560364  | -0.082547 | 0.224153  |
| H | 3.048006  | -2.800843 | -2.282764 | C                                               | 2.703810  | -0.131269 | -0.674140 |
| H | 1.915250  | -4.930758 | -2.768170 | C                                               | 3.146427  | 1.070152  | -1.262172 |
| H | 0.809287  | -6.199979 | -0.947204 | C                                               | 2.417217  | 2.401732  | -1.118358 |
| H | 0.853417  | -5.313554 | 1.367418  | C                                               | 3.308863  | 3.499953  | -0.516830 |
| H | 1.984873  | -3.180050 | 1.855169  | C                                               | 1.831687  | 2.848405  | -2.470675 |
| H | 3.412038  | -1.398289 | 1.187419  | C                                               | 4.278208  | 1.013949  | -2.076513 |
| H | 4.284525  | -1.530758 | -0.319010 | C                                               | 4.920161  | -0.186942 | -2.335111 |
| H | 2.385485  | -0.476689 | -1.535690 | C                                               | 4.422645  | -1.365425 | -1.801675 |
| H | 0.065500  | -0.204864 | -1.625899 | C                                               | 3.305407  | -1.371352 | -0.964625 |
| H | -1.534597 | -1.926611 | 0.924941  | C                                               | 2.767366  | -2.709043 | -0.472028 |
| H | -2.927109 | -3.194261 | 2.498451  | C                                               | 2.132497  | -3.499931 | -1.631286 |
| H | -3.326141 | -1.477291 | 2.629977  | C                                               | 3.836693  | -3.557989 | 0.234800  |
| H | -4.403133 | -2.570498 | 1.764687  | C                                               | 1.502442  | 0.595831  | 1.577395  |
| H | -2.164881 | -4.187784 | 0.287575  | C                                               | 2.312616  | -0.038927 | 2.743616  |
| H | -2.037784 | -3.177510 | -1.156282 | C                                               | 3.817903  | -0.011963 | 2.428331  |
| H | -3.625930 | -3.609267 | -0.515780 | C                                               | 1.871155  | -1.471852 | 3.074909  |
| H | -5.045396 | -1.720533 | -0.331982 | C                                               | 2.073702  | 0.863540  | 3.973747  |
| H | -5.917203 | 0.115703  | -1.713966 | C                                               | -0.032488 | 0.658571  | 1.822149  |
| H | -4.450077 | 1.976473  | -2.363104 | C                                               | -2.742949 | 1.223619  | 0.315013  |
| H | -0.940334 | 2.405266  | -1.182869 | C                                               | -2.368213 | 2.094052  | -0.711396 |
| H | -0.843091 | 3.038285  | -3.553690 | C                                               | -2.998512 | 3.324457  | -0.857089 |
| H | -1.046736 | 1.285863  | -3.421417 | C                                               | -4.013038 | 3.698966  | 0.020861  |
| H | -2.419639 | 2.301294  | -3.851920 | C                                               | -4.390833 | 2.838317  | 1.045320  |
| H | -1.809347 | 4.594091  | -1.780263 | C                                               | -3.755515 | 1.608138  | 1.192517  |
| H | -2.788746 | 3.952743  | -0.457193 |                                                 |           |           |           |
| H | -3.411862 | 3.943768  | -2.106991 |                                                 |           |           |           |

|                                        |           |           |           |   |           |           |           |
|----------------------------------------|-----------|-----------|-----------|---|-----------|-----------|-----------|
| H                                      | -3.660152 | -2.950208 | 0.965884  | C | 0.329132  | -0.384521 | -0.168086 |
| H                                      | -6.037671 | -3.589196 | 1.007708  | N | 1.557142  | -0.089745 | 0.223230  |
| H                                      | -7.634032 | -2.556589 | -0.584785 | C | 2.688834  | -0.175404 | -0.686988 |
| H                                      | -6.823411 | -0.878806 | -2.220273 | C | 3.086483  | 0.986113  | -1.378262 |
| H                                      | -4.446313 | -0.230858 | -2.255785 | C | 2.317802  | 2.303013  | -1.335874 |
| H                                      | -1.814061 | -2.034064 | -0.509182 | C | 3.178678  | 3.468311  | -0.821968 |
| H                                      | -2.169359 | -0.707945 | -1.618095 | C | 1.718624  | 2.628876  | -2.716578 |
| H                                      | -2.421577 | -0.568555 | 1.420763  | C | 4.212595  | 0.897752  | -2.197678 |
| H                                      | 0.142860  | -0.781900 | -1.160230 | C | 4.890215  | -0.299993 | -2.363544 |
| H                                      | 1.568663  | 2.266897  | -0.448953 | C | 4.434950  | -1.445269 | -1.729751 |
| H                                      | 2.732473  | 4.416268  | -0.374120 | C | 3.326392  | -1.416060 | -0.881782 |
| H                                      | 3.719911  | 3.202474  | 0.449595  | C | 2.837246  | -2.723216 | -0.270458 |
| H                                      | 4.147065  | 3.736096  | -1.174844 | C | 2.216350  | -3.630161 | -1.349703 |
| H                                      | 1.249622  | 3.763615  | -2.343702 | C | 3.942801  | -3.473580 | 0.489650  |
| H                                      | 1.176641  | 2.083133  | -2.892357 | C | 1.498820  | 0.691894  | 1.520289  |
| H                                      | 2.619655  | 3.051773  | -3.198134 | C | 2.382569  | 0.213742  | 2.707509  |
| H                                      | 4.649095  | 1.922567  | -2.533000 | C | 3.874553  | 0.328793  | 2.349493  |
| H                                      | 5.795722  | -0.207522 | -2.972051 | C | 2.065818  | -1.218635 | 3.159951  |
| H                                      | 4.908587  | -2.301588 | -2.043155 | C | 2.099643  | 1.187669  | 3.872330  |
| H                                      | 1.978148  | -2.512683 | 0.252239  | C | -0.028466 | 0.682154  | 1.813040  |
| H                                      | 1.702976  | -4.433199 | -1.261153 | C | -2.754043 | 1.179648  | 0.348042  |
| H                                      | 1.338943  | -2.933361 | -2.123222 | C | -2.366359 | 2.060428  | -0.664326 |
| H                                      | 2.876663  | -3.750540 | -2.389709 | C | -3.007408 | 3.284387  | -0.817650 |
| H                                      | 3.384432  | -4.467315 | 0.635999  | C | -4.045798 | 3.641887  | 0.039077  |
| H                                      | 4.301381  | -3.019243 | 1.061787  | C | -4.435704 | 2.771199  | 1.050562  |
| H                                      | 4.627869  | -3.861670 | -0.452700 | C | -3.789538 | 1.547709  | 1.205623  |
| H                                      | 1.893806  | 1.602499  | 1.441555  | H | -3.707593 | -2.937472 | 1.039673  |
| H                                      | 4.157338  | 1.001539  | 2.203037  | H | -6.090868 | -3.554346 | 1.055333  |
| H                                      | 4.377677  | -0.363019 | 3.297099  | H | -7.648930 | -2.553067 | -0.593972 |
| H                                      | 4.080170  | -0.649057 | 1.586082  | H | -6.793991 | -0.927563 | -2.259645 |
| H                                      | 2.044177  | -2.156447 | 2.246126  | H | -4.410875 | -0.300916 | -2.268689 |
| H                                      | 2.445028  | -1.840449 | 3.926823  | H | -1.823948 | -2.082141 | -0.459734 |
| H                                      | 0.816468  | -1.531753 | 3.350867  | H | -2.161579 | -0.757997 | -1.576964 |
| H                                      | 1.032892  | 0.858513  | 4.302774  | H | -2.410495 | -0.604619 | 1.462063  |
| H                                      | 2.362349  | 1.897907  | 3.771863  | H | 0.137350  | -0.890223 | -1.102303 |
| H                                      | 2.679133  | 0.506729  | 4.808160  | H | 1.473489  | 2.196639  | -0.656126 |
| H                                      | -0.339620 | 0.104553  | 2.707595  | H | 2.578811  | 4.378058  | -0.753682 |
| H                                      | -0.403053 | 1.678880  | 1.906570  | H | 3.592226  | 3.259054  | 0.166332  |
| H                                      | -1.581634 | 1.820861  | -1.405997 | H | 4.013562  | 3.672197  | -1.494680 |
| H                                      | -2.699919 | 3.990621  | -1.656873 | H | 1.118396  | 3.539426  | -2.659235 |
| H                                      | -4.504515 | 4.656846  | -0.094261 | H | 1.077494  | 1.819664  | -3.072523 |
| H                                      | -5.178260 | 3.122022  | 1.732213  | H | 2.498901  | 2.789566  | -3.462638 |
| H                                      | -4.054703 | 0.941238  | 1.992628  | H | 4.551031  | 1.776585  | -2.731194 |
| B3LYP energy = -1393.22209504 a.u.     |           |           |           | H | 5.760898  | -0.345754 | -3.005857 |
| (5 <i>R</i> ,1' <i>R</i> )-5a, Conf. D |           |           |           | H | 4.948493  | -2.382674 | -1.898451 |
| C                                      | -4.382043 | -2.483728 | 0.321316  | H | 2.050081  | -2.489898 | 0.445343  |
| C                                      | -5.727367 | -2.836551 | 0.330212  | H | 1.825341  | -4.543656 | -0.896597 |
| C                                      | -6.601999 | -2.276310 | -0.597043 | H | 1.396927  | -3.134858 | -1.875267 |
| C                                      | -6.121777 | -1.364370 | -1.531417 | H | 2.959715  | -3.917308 | -2.095982 |
| C                                      | -4.775221 | -1.011698 | -1.536272 | H | 3.522864  | -4.348311 | 0.990383  |
| C                                      | -3.890484 | -1.564483 | -0.609575 | H | 4.412937  | -2.844040 | 1.246387  |
| C                                      | -2.426923 | -1.181912 | -0.606444 | H | 4.725073  | -3.826559 | -0.184639 |
| C                                      | -2.081593 | -0.175849 | 0.512708  | H | 1.817430  | 1.707028  | 1.285457  |
| N                                      | -0.619088 | -0.004118 | 0.647969  | H | 4.132489  | 1.343134  | 2.037118  |
|                                        |           |           |           | H | 4.478698  | 0.090513  | 3.226755  |
|                                        |           |           |           | H | 4.165511  | -0.352614 | 1.552277  |



|   |           |           |           |
|---|-----------|-----------|-----------|
| H | 2.292788  | -1.950156 | 2.386661  |
| H | 2.674003  | -1.465810 | 4.031770  |
| H | 1.022138  | -1.346728 | 3.453440  |
| H | 1.072077  | 1.120957  | 4.234912  |
| H | 2.293575  | 2.223254  | 3.583388  |
| H | 2.755069  | 0.948858  | 4.710999  |
| H | -0.280378 | 0.123375  | 2.713412  |
| H | -0.444794 | 1.683964  | 1.898267  |
| H | -1.558146 | 1.800706  | -1.338700 |
| H | -2.698071 | 3.958901  | -1.606304 |
| H | -4.545733 | 4.594696  | -0.081604 |
| H | -5.241014 | 3.042232  | 1.721657  |
| H | -4.098035 | 0.873930  | 1.996342  |

B3LYP energy = -1393.22208944 a.u.

(5*R*,1'*R*)-**5a**, Conf. E

|   |           |           |           |
|---|-----------|-----------|-----------|
| C | 2.643852  | 3.425098  | 0.354461  |
| C | 2.173815  | 4.719444  | 0.545950  |
| C | 1.325704  | 5.303465  | -0.391944 |
| C | 0.955050  | 4.583456  | -1.521671 |
| C | 1.424086  | 3.285268  | -1.707685 |
| C | 2.270594  | 2.686363  | -0.773265 |
| C | 2.820606  | 1.295637  | -1.017410 |
| C | 2.669116  | 0.297003  | 0.144046  |
| N | 1.260677  | -0.012396 | 0.469549  |
| C | 0.195950  | 0.075550  | -0.284682 |
| N | -0.924954 | -0.345812 | 0.278359  |
| C | -2.123177 | -0.629473 | -0.498037 |
| C | -2.328798 | -1.947549 | -0.953610 |
| C | -1.299480 | -3.065174 | -0.817975 |
| C | -1.846979 | -4.281234 | -0.053338 |
| C | -0.765997 | -3.480954 | -2.201460 |
| C | -3.519508 | -2.221175 | -1.627858 |
| C | -4.450971 | -1.225983 | -1.878845 |
| C | -4.191954 | 0.076907  | -1.484773 |
| C | -3.025597 | 0.410726  | -0.793823 |
| C | -2.768647 | 1.875494  | -0.464458 |
| C | -2.523956 | 2.683054  | -1.752247 |
| C | -3.904251 | 2.510318  | 0.354965  |
| C | -0.623051 | -0.882906 | 1.663000  |
| C | -1.460300 | -0.341632 | 2.856864  |
| C | -2.938170 | -0.740681 | 2.701348  |
| C | -1.343710 | 1.178664  | 3.033906  |
| C | -0.914596 | -1.043459 | 4.119663  |
| C | 0.901099  | -0.601877 | 1.772459  |
| C | 3.456443  | -0.985135 | -0.095938 |
| C | 3.059296  | -1.911765 | -1.061701 |
| C | 3.814783  | -3.055744 | -1.293583 |
| C | 4.977744  | -3.285977 | -0.562770 |
| C | 5.380564  | -2.366899 | 0.400007  |
| C | 4.621246  | -1.223422 | 0.633002  |
| H | 3.321671  | 2.999254  | 1.085306  |
| H | 2.478370  | 5.276808  | 1.423292  |
| H | 0.964518  | 6.313669  | -0.245374 |
| H | 0.303725  | 5.030328  | -2.262370 |

|   |           |           |           |
|---|-----------|-----------|-----------|
| H | 1.138736  | 2.740499  | -2.600992 |
| H | 2.393664  | 0.875345  | -1.930757 |
| H | 3.895377  | 1.358968  | -1.204696 |
| H | 3.065778  | 0.762526  | 1.047476  |
| H | 0.218755  | 0.447463  | -1.297607 |
| H | -0.441425 | -2.691162 | -0.260521 |
| H | -2.672165 | -4.752464 | -0.590474 |
| H | -1.062974 | -5.030887 | 0.071384  |
| H | -2.212222 | -4.004363 | 0.937225  |
| H | 0.013175  | -4.238131 | -2.091134 |
| H | -0.339645 | -2.628651 | -2.735163 |
| H | -1.556926 | -3.903319 | -2.823746 |
| H | -3.710857 | -3.226487 | -1.980005 |
| H | -5.368581 | -1.461725 | -2.403415 |
| H | -4.907686 | 0.853520  | -1.721595 |
| H | -1.858558 | 1.937710  | 0.130865  |
| H | -2.268567 | 3.715109  | -1.505459 |
| H | -1.706292 | 2.264602  | -2.342233 |
| H | -3.415003 | 2.698430  | -2.382987 |
| H | -3.639713 | 3.534854  | 0.624653  |
| H | -4.101229 | 1.959815  | 1.275761  |
| H | -4.834002 | 2.550410  | -0.215357 |
| H | -0.796614 | -1.957533 | 1.624557  |
| H | -3.048193 | -1.821673 | 2.589174  |
| H | -3.490835 | -0.443622 | 3.594499  |
| H | -3.411560 | -0.264135 | 1.845339  |
| H | -1.732832 | 1.721257  | 2.174067  |
| H | -1.922494 | 1.487547  | 3.906056  |
| H | -0.315208 | 1.503711  | 3.201946  |
| H | 0.119184  | -0.769292 | 4.338033  |
| H | -0.967220 | -2.130913 | 4.027649  |
| H | -1.515740 | -0.753916 | 4.982747  |
| H | 1.140491  | 0.112036  | 2.558969  |
| H | 1.483858  | -1.507005 | 1.937201  |
| H | 2.159402  | -1.748942 | -1.642957 |
| H | 3.497401  | -3.766772 | -2.046052 |
| H | 5.565047  | -4.177410 | -0.743510 |
| H | 6.282534  | -2.539398 | 0.973647  |
| H | 4.939957  | -0.511049 | 1.385614  |

B3LYP energy = -1393.22128141 a.u.

(5*R*,1'*R*)-**5a**, Conf. F

|   |           |           |           |
|---|-----------|-----------|-----------|
| C | -5.359111 | -1.113473 | -0.689742 |
| C | -6.569976 | -1.509405 | -0.127957 |
| C | -6.586306 | -2.386599 | 0.951277  |
| C | -5.384647 | -2.869604 | 1.463002  |
| C | -4.177329 | -2.473080 | 0.898345  |
| C | -4.148042 | -1.587373 | -0.183283 |
| C | -2.824347 | -1.165201 | -0.783977 |
| C | -2.073979 | -0.138083 | 0.092223  |
| N | -0.653328 | -0.046500 | -0.334867 |
| C | 0.379717  | -0.277858 | 0.432661  |
| N | 1.557730  | -0.065232 | -0.126531 |
| C | 2.785966  | -0.571919 | 0.466525  |
| C | 3.264632  | -1.830046 | 0.050244  |

|   |           |           |           |
|---|-----------|-----------|-----------|
| C | 2.504703  | -2.759928 | -0.891519 |
| C | 3.299995  | -3.080004 | -2.167788 |
| C | 2.090384  | -4.053736 | -0.166321 |
| C | 4.477135  | -2.268500 | 0.584180  |
| C | 5.164183  | -1.516497 | 1.524267  |
| C | 4.635462  | -0.315662 | 1.970610  |
| C | 3.436325  | 0.185363  | 1.460328  |
| C | 2.875250  | 1.478497  | 2.038624  |
| C | 2.378588  | 1.265252  | 3.480951  |
| C | 3.882520  | 2.638663  | 1.983810  |
| C | 1.357585  | 0.342724  | -1.571571 |
| C | 2.088880  | 1.614962  | -2.086643 |
| C | 3.613479  | 1.415340  | -2.038299 |
| C | 1.704932  | 2.888418  | -1.319733 |
| C | 1.680568  | 1.772333  | -3.568014 |
| C | -0.194650 | 0.420023  | -1.657298 |
| C | -2.699081 | 1.246537  | 0.174145  |
| C | -3.216370 | 1.904129  | -0.944229 |
| C | -3.747201 | 3.185390  | -0.827976 |
| C | -3.772428 | 3.824153  | 0.407736  |
| C | -3.263333 | 3.175788  | 1.528727  |
| C | -2.729840 | 1.897103  | 1.409275  |
| H | -5.359870 | -0.433562 | -1.533190 |
| H | -7.499917 | -1.133311 | -0.536449 |
| H | -7.527665 | -2.696608 | 1.387629  |
| H | -5.388036 | -3.560742 | 2.296999  |
| H | -3.248842 | -2.867929 | 1.297132  |
| H | -2.178576 | -2.040560 | -0.888583 |
| H | -2.983092 | -0.767596 | -1.786834 |
| H | -2.028644 | -0.540054 | 1.104727  |
| H | 0.282869  | -0.636748 | 1.447778  |
| H | 1.578354  | -2.273291 | -1.196052 |
| H | 2.702343  | -3.701116 | -2.838070 |
| H | 3.583453  | -2.173957 | -2.706251 |
| H | 4.215381  | -3.628287 | -1.937348 |
| H | 1.490409  | -4.679823 | -0.830174 |
| H | 1.498254  | -3.837827 | 0.725305  |
| H | 2.960433  | -4.635046 | 0.143581  |
| H | 4.879469  | -3.224482 | 0.274792  |
| H | 6.102596  | -1.877832 | 1.926209  |
| H | 5.163079  | 0.244061  | 2.731845  |
| H | 2.010900  | 1.768876  | 1.443073  |
| H | 1.935330  | 2.186116  | 3.866009  |
| H | 1.625055  | 0.477193  | 3.539406  |
| H | 3.200049  | 0.985962  | 4.143657  |
| H | 3.404575  | 3.562415  | 2.316143  |
| H | 4.261367  | 2.799413  | 0.973498  |
| H | 4.738104  | 2.459154  | 2.637152  |
| H | 1.716032  | -0.487223 | -2.179329 |
| H | 3.915457  | 0.526810  | -2.597149 |
| H | 4.107635  | 2.275627  | -2.493204 |
| H | 3.989321  | 1.316897  | -1.021640 |
| H | 2.005542  | 2.842954  | -0.274679 |
| H | 2.210996  | 3.745450  | -1.767381 |
| H | 0.633982  | 3.096356  | -1.355832 |
| H | 0.615012  | 1.976196  | -3.689468 |

|   |           |           |           |
|---|-----------|-----------|-----------|
| H | 1.926026  | 0.878892  | -4.147174 |
| H | 2.223023  | 2.611336  | -4.006056 |
| H | -0.548781 | 1.435774  | -1.819174 |
| H | -0.597797 | -0.219209 | -2.440200 |
| H | -3.220988 | 1.424012  | -1.914641 |
| H | -4.146625 | 3.681331  | -1.703795 |
| H | -4.191093 | 4.818641  | 0.497243  |
| H | -3.286803 | 3.661553  | 2.496123  |
| H | -2.341117 | 1.396068  | 2.288689  |

B3LYP energy = -1393.22126745 a.u.

(5*R*,1'*R*)-**5a**, Conf. G

|   |           |           |           |
|---|-----------|-----------|-----------|
| C | 5.328522  | -1.102816 | 0.710291  |
| C | 6.545227  | -1.498222 | 0.161094  |
| C | 6.573420  | -2.385977 | -0.909328 |
| C | 5.377833  | -2.879888 | -1.424768 |
| C | 4.164466  | -2.483754 | -0.872701 |
| C | 4.123398  | -1.587892 | 0.199997  |
| C | 2.794436  | -1.161381 | 0.785138  |
| C | 2.060647  | -0.129973 | -0.101424 |
| N | 0.641068  | -0.012680 | 0.323043  |
| C | -0.392634 | -0.254274 | -0.440667 |
| N | -1.570867 | -0.044407 | 0.119063  |
| C | -2.795904 | -0.564610 | -0.468993 |
| C | -3.258145 | -1.828583 | -0.051573 |
| C | -2.482682 | -2.750020 | 0.885794  |
| C | -3.268067 | -3.082630 | 2.164958  |
| C | -2.053808 | -4.036908 | 0.156827  |
| C | -4.467520 | -2.280730 | -0.581040 |
| C | -5.167103 | -1.535750 | -1.517540 |
| C | -4.654271 | -0.328441 | -1.965022 |
| C | -3.458756 | 0.185904  | -1.459389 |
| C | -2.914190 | 1.485487  | -2.039225 |
| C | -2.417085 | 1.277293  | -3.482166 |
| C | -3.935407 | 2.633270  | -1.983302 |
| C | -1.370082 | 0.364469  | 1.563411  |
| C | -2.116421 | 1.625036  | 2.085176  |
| C | -3.638236 | 1.402879  | 2.046162  |
| C | -1.756709 | 2.905415  | 1.318087  |
| C | -1.700421 | 1.785833  | 3.564004  |
| C | 0.181085  | 0.463685  | 1.641907  |
| C | 2.722160  | 1.236259  | -0.189268 |
| C | 3.162474  | 1.925405  | 0.943702  |
| C | 3.740090  | 3.185413  | 0.824799  |
| C | 3.894298  | 3.769889  | -0.428785 |
| C | 3.470550  | 3.086509  | -1.563876 |
| C | 2.887168  | 1.829448  | -1.442058 |
| H | 5.319320  | -0.413818 | 1.546367  |
| H | 7.470413  | -1.113259 | 0.572126  |
| H | 7.519354  | -2.695405 | -1.336122 |
| H | 5.390581  | -3.578876 | -2.252105 |
| H | 3.240724  | -2.886204 | -1.274754 |
| H | 2.143707  | -2.033371 | 0.886303  |
| H | 2.945260  | -0.758427 | 1.787191  |
| H | 2.008205  | -0.538523 | -1.110803 |

|   |           |           |           |   |           |           |           |
|---|-----------|-----------|-----------|---|-----------|-----------|-----------|
| H | -0.296263 | -0.620077 | -1.453417 | C | -5.132765 | 1.794691  | -0.117897 |
| H | -1.561895 | -2.251626 | 1.187881  | C | -4.464402 | 1.595268  | 1.079633  |
| H | -2.658527 | -3.695402 | 2.832216  | C | -3.256792 | 0.896747  | 1.131591  |
| H | -3.562389 | -2.181164 | 2.705312  | C | -2.543590 | 0.769330  | 2.472649  |
| H | -4.176265 | -3.644135 | 1.938049  | C | -1.997862 | 2.134433  | 2.932554  |
| H | -1.441810 | -4.655425 | 0.816807  | C | -3.434561 | 0.154272  | 3.564277  |
| H | -1.469382 | -3.811454 | -0.737461 | C | -1.367259 | -1.836939 | -0.455841 |
| H | -2.917241 | -4.629896 | -0.149497 | C | -1.979197 | -2.906045 | 0.494948  |
| H | -4.857483 | -3.241832 | -0.271493 | C | -3.505778 | -2.738052 | 0.582868  |
| H | -6.102877 | -1.907690 | -1.915929 | C | -1.368685 | -2.877022 | 1.903613  |
| H | -5.191662 | 0.225566  | -2.723595 | C | -1.693937 | -4.278080 | -0.154064 |
| H | -2.052358 | 1.786681  | -1.445270 | C | 0.174948  | -1.947596 | -0.634373 |
| H | -1.988393 | 2.204056  | -3.869531 | C | 2.336107  | 1.246505  | -0.241125 |
| H | -1.651724 | 0.500675  | -3.540658 | C | 2.314039  | 1.871619  | 1.009172  |
| H | -3.235446 | 0.984415  | -4.142862 | C | 2.502205  | 3.245516  | 1.114779  |
| H | -3.469017 | 3.562789  | -2.315901 | C | 2.721987  | 4.011736  | -0.026631 |
| H | -4.315155 | 2.789196  | -0.972539 | C | 2.749479  | 3.398361  | -1.274550 |
| H | -4.789473 | 2.443730  | -2.635814 | C | 2.554826  | 2.024534  | -1.379340 |
| H | -1.714185 | -0.471695 | 2.171203  | H | 4.891023  | 0.226526  | 1.986830  |
| H | -3.923736 | 0.508420  | 2.604212  | H | 7.305689  | 0.369300  | 1.522566  |
| H | -4.142070 | 2.254450  | 2.506763  | H | 8.268252  | -0.794163 | -0.444028 |
| H | -4.019138 | 1.301838  | 1.031574  | H | 6.788214  | -2.113933 | -1.933758 |
| H | -2.063127 | 2.857227  | 0.274883  | H | 4.378289  | -2.269189 | -1.462561 |
| H | -2.272734 | 3.753917  | 1.770569  | H | 2.665222  | -2.157826 | 0.451236  |
| H | -0.688798 | 3.129282  | 1.347788  | H | 2.757913  | -0.835703 | 1.598237  |
| H | -0.637021 | 2.004590  | 3.678399  | H | 2.399523  | -0.518759 | -1.417023 |
| H | -1.929057 | 0.888008  | 4.143291  | H | -0.197249 | 1.241776  | 0.173088  |
| H | -2.251739 | 2.616251  | 4.007312  | H | -1.797040 | -0.213362 | -2.494449 |
| H | 0.520341  | 1.486672  | 1.788707  | H | -3.137466 | -0.969488 | -4.398763 |
| H | 0.595735  | -0.159083 | 2.431864  | H | -3.858752 | -1.595021 | -2.911165 |
| H | 3.071348  | 1.483909  | 1.928344  | H | -4.589408 | -0.221272 | -3.737701 |
| H | 4.076438  | 3.707073  | 1.712091  | H | -1.939399 | 1.270178  | -4.421351 |
| H | 4.349455  | 4.748047  | -0.520224 | H | -1.780594 | 2.223220  | -2.939913 |
| H | 3.597761  | 3.527942  | -2.544391 | H | -3.345543 | 2.092610  | -3.745430 |
| H | 2.568908  | 1.300169  | -2.332943 | H | -5.088778 | 1.535895  | -2.237013 |

B3LYP energy = -1393.22122622 a.u.

(5*R*,1'*R*)-**5a**, Conf. H

|   |           |           |           |   |           |           |           |
|---|-----------|-----------|-----------|---|-----------|-----------|-----------|
| C | 5.300417  | -0.283644 | 1.123123  | H | -4.887012 | 1.991362  | 1.993613  |
| C | 6.665488  | -0.202278 | 0.861827  | H | -1.687576 | 0.108185  | 2.344132  |
| C | 7.206297  | -0.855147 | -0.241004 | H | -1.433325 | 2.021118  | 3.860565  |
| C | 6.374575  | -1.593802 | -1.078429 | H | -1.338325 | 2.582313  | 2.186595  |
| C | 5.012055  | -1.675862 | -0.812035 | H | -2.810657 | 2.839089  | 3.119510  |
| C | 4.455927  | -1.018250 | 0.289482  | H | -2.854891 | 0.005990  | 4.477719  |
| C | 2.971769  | -1.116489 | 0.566329  | H | -3.839258 | -0.812132 | 3.260827  |
| C | 2.126017  | -0.247501 | -0.394284 | H | -4.274355 | 0.805939  | 3.811343  |
| N | 0.684192  | -0.607065 | -0.280204 | H | -1.860837 | -1.959797 | -1.418386 |
| C | -0.323874 | 0.189594  | -0.030609 | H | -3.968372 | -2.766835 | -0.406029 |
| N | -1.514034 | -0.382127 | -0.070099 | H | -3.928081 | -3.556656 | 1.168626  |
| C | -2.742850 | 0.394834  | -0.080189 | H | -3.795746 | -1.804591 | 1.060977  |
| C | -3.364413 | 0.650061  | -1.318829 | H | -1.561754 | -1.935239 | 2.415362  |
| C | -2.752165 | 0.281687  | -2.666876 | H | -1.809161 | -3.672199 | 2.507334  |
| C | -3.637647 | -0.684529 | -3.470937 | H | -0.289763 | -3.043581 | 1.895235  |
| C | -2.436983 | 1.545229  | -3.488871 | H | -0.627451 | -4.503703 | -0.211927 |
| C | -4.579323 | 1.336336  | -1.303160 | H | -2.110666 | -4.336808 | -1.162335 |
|   |           |           |           | H | -2.158623 | -5.063992 | 0.443003  |
|   |           |           |           | H | 0.606703  | -2.696232 | 0.023415  |
|   |           |           |           | H | 0.463819  | -2.180811 | -1.659551 |

|   |          |          |           |
|---|----------|----------|-----------|
| H | 2.155040 | 1.291956 | 1.910422  |
| H | 2.485049 | 3.716221 | 2.089685  |
| H | 2.875429 | 5.080187 | 0.057812  |
| H | 2.926829 | 3.986099 | -2.166374 |
| H | 2.582842 | 1.552539 | -2.354620 |

B3LYP energy = -1393.22101132 a.u.

(5*R*,1'*R*)-**5a**, Conf. I

|   |           |           |           |
|---|-----------|-----------|-----------|
| C | 3.798206  | -1.498973 | 1.166145  |
| C | 4.511079  | -2.639574 | 0.802782  |
| C | 5.394757  | -2.597801 | -0.270105 |
| C | 5.567305  | -1.407158 | -0.972641 |
| C | 4.856756  | -0.270139 | -0.605033 |
| C | 3.956511  | -0.302063 | 0.465541  |
| C | 3.201639  | 0.944007  | 0.873817  |
| C | 2.189222  | 1.472072  | -0.165720 |
| N | 1.053612  | 0.529755  | -0.379358 |
| C | -0.105072 | 0.547641  | 0.226521  |
| N | -0.960233 | -0.380460 | -0.165622 |
| C | -2.366875 | -0.333908 | 0.201552  |
| C | -2.770209 | -0.838350 | 1.453711  |
| C | -1.799683 | -1.335483 | 2.518388  |
| C | -1.743606 | -0.354353 | 3.704913  |
| C | -2.134001 | -2.752502 | 3.012334  |
| C | -4.135088 | -0.824603 | 1.746232  |
| C | -5.062241 | -0.328666 | 0.843490  |
| C | -4.634938 | 0.211673  | -0.359178 |
| C | -3.282094 | 0.245440  | -0.699900 |
| C | -2.873405 | 0.958902  | -1.984913 |
| C | -3.477214 | 0.302588  | -3.237719 |
| C | -3.239620 | 2.453260  | -1.921831 |
| C | -0.353049 | -1.174627 | -1.304124 |
| C | -0.380948 | -2.726366 | -1.218156 |
| C | -1.830972 | -3.241589 | -1.225445 |
| C | 0.358058  | -3.277115 | 0.008356  |
| C | 0.308224  | -3.238847 | -2.501784 |
| C | 1.075263  | -0.559394 | -1.377304 |
| C | 1.675156  | 2.873008  | 0.131073  |
| C | 1.431466  | 3.742822  | -0.935231 |
| C | 0.952347  | 5.028190  | -0.708951 |
| C | 0.708991  | 5.462398  | 0.591057  |
| C | 0.951601  | 4.606255  | 1.659885  |
| C | 1.434048  | 3.320114  | 1.432090  |
| H | 3.119545  | -1.539495 | 2.010707  |
| H | 4.378591  | -3.557524 | 1.362159  |
| H | 5.952509  | -3.482080 | -0.552049 |
| H | 6.263951  | -1.361898 | -1.800769 |
| H | 5.016248  | 0.654759  | -1.148643 |
| H | 2.692866  | 0.768203  | 1.822978  |
| H | 3.913945  | 1.754715  | 1.045034  |
| H | 2.684997  | 1.505467  | -1.136656 |
| H | -0.357728 | 1.282678  | 0.976596  |
| H | -0.802062 | -1.371195 | 2.081655  |
| H | -0.991633 | -0.678587 | 4.427539  |
| H | -1.494393 | 0.659423  | 3.384656  |

|   |           |           |           |
|---|-----------|-----------|-----------|
| H | -2.704789 | -0.308180 | 4.220942  |
| H | -1.368022 | -3.093563 | 3.711843  |
| H | -2.183369 | -3.467668 | 2.190135  |
| H | -3.091072 | -2.779163 | 3.535868  |
| H | -4.476711 | -1.206922 | 2.699139  |
| H | -6.117303 | -0.342394 | 1.087173  |
| H | -5.363621 | 0.635379  | -1.038152 |
| H | -1.789277 | 0.915424  | -2.080645 |
| H | -3.116308 | 0.805768  | -4.137109 |
| H | -3.213461 | -0.754131 | -3.310852 |
| H | -4.566599 | 0.371817  | -3.234596 |
| H | -2.879615 | 2.964759  | -2.816966 |
| H | -2.792692 | 2.936111  | -1.050873 |
| H | -4.320029 | 2.597139  | -1.867461 |
| H | -0.911699 | -0.906680 | -2.200253 |
| H | -2.383487 | -2.866878 | -2.089810 |
| H | -1.828134 | -4.331561 | -1.282774 |
| H | -2.378299 | -2.958719 | -0.328147 |
| H | -0.114016 | -2.968364 | 0.939423  |
| H | 0.342287  | -4.368201 | -0.018815 |
| H | 1.405121  | -2.972918 | 0.040453  |
| H | 1.364238  | -2.966701 | -2.547779 |
| H | -0.183768 | -2.855961 | -3.399220 |
| H | 0.252692  | -4.327969 | -2.532801 |
| H | 1.852238  | -1.272777 | -1.114275 |
| H | 1.299998  | -0.145955 | -2.359502 |
| H | 1.627393  | 3.416168  | -1.950260 |
| H | 0.776329  | 5.691904  | -1.546155 |
| H | 0.339650  | 6.464356  | 0.769702  |
| H | 0.773185  | 4.939330  | 2.674573  |
| H | 1.628972  | 2.675855  | 2.279722  |

B3LYP energy = -1393.22067027 a.u.

(5*R*,1'*R*)-**5a**, Conf. J

|   |           |           |           |
|---|-----------|-----------|-----------|
| C | -3.800833 | -1.482734 | -1.163901 |
| C | -4.518283 | -2.621847 | -0.804852 |
| C | -5.401547 | -2.580742 | 0.268390  |
| C | -5.569157 | -1.392200 | 0.975661  |
| C | -4.854094 | -0.256655 | 0.612339  |
| C | -3.954251 | -0.287953 | -0.458611 |
| C | -3.195136 | 0.956973  | -0.862359 |
| C | -2.180401 | 1.476951  | 0.179099  |
| N | -1.048495 | 0.529266  | 0.388744  |
| C | 0.109575  | 0.544183  | -0.218542 |
| N | 0.962322  | -0.386195 | 0.171725  |
| C | 2.365596  | -0.347393 | -0.206873 |
| C | 3.294164  | 0.215001  | 0.691079  |
| C | 2.902585  | 0.922043  | 1.984736  |
| C | 3.515705  | 0.256010  | 3.227676  |
| C | 3.274808  | 2.415113  | 1.925448  |
| C | 4.643187  | 0.173520  | 0.335930  |
| C | 5.053048  | -0.355487 | -0.877848 |
| C | 4.112284  | -0.832006 | -1.777235 |
| C | 2.750903  | -0.839408 | -1.469404 |
| C | 1.761013  | -1.309371 | -2.528322 |

|   |           |           |           |
|---|-----------|-----------|-----------|
| C | 1.659434  | -0.279348 | -3.669365 |
| C | 2.097773  | -2.701524 | -3.086206 |
| C | 0.353769  | -1.183245 | 1.306789  |
| C | 0.374735  | -2.734819 | 1.211488  |
| C | 1.822426  | -3.256441 | 1.208137  |
| C | -0.371721 | -3.276195 | -0.014747 |
| C | -0.310834 | -3.251284 | 2.495418  |
| C | -1.071639 | -0.560966 | 1.385782  |
| C | -1.660642 | 2.877059  | -0.111753 |
| C | -1.421880 | 3.330817  | -1.410846 |
| C | -0.933331 | 4.615787  | -1.632535 |
| C | -0.682194 | 5.464102  | -0.559496 |
| C | -0.923583 | 5.023424  | 0.738723  |
| C | -1.408887 | 3.739355  | 0.958870  |
| H | -3.122728 | -1.522631 | -2.008945 |
| H | -4.389667 | -3.538129 | -1.367858 |
| H | -5.962926 | -3.463825 | 0.546876  |
| H | -6.265487 | -1.347357 | 1.804081  |
| H | -5.009764 | 0.666770  | 1.159545  |
| H | -2.687518 | 0.783139  | -1.812526 |
| H | -3.904733 | 1.770825  | -1.029965 |
| H | -2.676038 | 1.508284  | 1.150140  |
| H | 0.364773  | 1.276626  | -0.970472 |
| H | 1.819304  | 0.883275  | 2.091000  |
| H | 3.167568  | 0.757096  | 4.133260  |
| H | 3.245658  | -0.799266 | 3.298734  |
| H | 4.605402  | 0.318296  | 3.213406  |
| H | 2.928665  | 2.923161  | 2.828006  |
| H | 2.818528  | 2.904739  | 1.063079  |
| H | 4.355054  | 2.554511  | 1.857693  |
| H | 5.382629  | 0.583268  | 1.011914  |
| H | 6.105295  | -0.374783 | -1.133030 |
| H | 4.440444  | -1.203867 | -2.738836 |
| H | 0.775787  | -1.376809 | -2.068225 |
| H | 0.899819  | -0.587704 | -4.390920 |
| H | 1.393974  | 0.712976  | -3.297529 |
| H | 2.608901  | -0.187276 | -4.200601 |
| H | 1.315654  | -3.024631 | -3.776324 |
| H | 2.177159  | -3.446133 | -2.292687 |
| H | 3.039511  | -2.698744 | -3.637536 |
| H | 0.915054  | -0.923233 | 2.203579  |
| H | 2.382318  | -2.888089 | 2.070498  |
| H | 1.814880  | -4.346629 | 1.260787  |
| H | 2.364875  | -2.972307 | 0.308131  |
| H | 0.103109  | -2.972059 | -0.946071 |
| H | -0.367558 | -4.367408 | 0.011325  |
| H | -1.415504 | -2.960805 | -0.045685 |
| H | -1.365176 | -2.973847 | 2.548332  |
| H | 0.187588  | -2.875948 | 3.392502  |
| H | -0.260915 | -4.340835 | 2.520030  |
| H | -1.853102 | -1.270264 | 1.124938  |
| H | -1.290388 | -0.147462 | 2.369293  |
| H | -1.623485 | 2.693166  | -2.261884 |
| H | -0.756766 | 4.954038  | -2.645838 |
| H | -0.307917 | 6.465059  | -0.733429 |
| H | -0.741254 | 5.681160  | 1.579295  |

H -1.603352 3.407837 1.972605  
 B3LYP energy = -1393.22066930 a.u.

(5*R*,1'*R*)-**5a**, Conf. K

|   |           |           |           |
|---|-----------|-----------|-----------|
| C | 3.508657  | -1.624905 | 1.189565  |
| C | 4.118199  | -2.824977 | 0.830472  |
| C | 5.058092  | -2.850582 | -0.193892 |
| C | 5.389441  | -1.668739 | -0.853143 |
| C | 4.780879  | -0.472505 | -0.490248 |
| C | 3.826966  | -0.435302 | 0.532567  |
| C | 3.177926  | 0.870587  | 0.933915  |
| C | 2.234971  | 1.473772  | -0.126985 |
| N | 1.068448  | 0.589780  | -0.412535 |
| C | -0.035397 | 0.498620  | 0.282444  |
| N | -0.934604 | -0.342996 | -0.196358 |
| C | -2.297291 | -0.375052 | 0.311068  |
| C | -3.286222 | 0.373248  | -0.357142 |
| C | -2.992098 | 1.328209  | -1.509471 |
| C | -3.748596 | 0.950848  | -2.793478 |
| C | -3.292326 | 2.782857  | -1.104134 |
| C | -4.597159 | 0.276081  | 0.111070  |
| C | -4.910355 | -0.490720 | 1.222381  |
| C | -3.906972 | -1.158185 | 1.906922  |
| C | -2.580199 | -1.116580 | 1.475091  |
| C | -1.514750 | -1.814680 | 2.311389  |
| C | -1.281602 | -1.059549 | 3.633497  |
| C | -1.846372 | -3.290240 | 2.586520  |
| C | -0.444851 | -0.899584 | -1.519403 |
| C | -0.515802 | -2.434474 | -1.755028 |
| C | -1.977376 | -2.915467 | -1.744595 |
| C | 0.304075  | -3.245291 | -0.743327 |
| C | 0.050651  | -2.674365 | -3.171843 |
| C | 0.990723  | -0.301857 | -1.586864 |
| C | 1.770746  | 2.892629  | 0.173834  |
| C | 1.510910  | 3.752354  | -0.897662 |
| C | 1.069352  | 5.051409  | -0.677226 |
| C | 0.882585  | 5.512046  | 0.623500  |
| C | 1.144114  | 4.667687  | 1.696570  |
| C | 1.587678  | 3.365968  | 1.474511  |
| H | 2.787711  | -1.612538 | 1.999116  |
| H | 3.862422  | -3.736817 | 1.356065  |
| H | 5.536390  | -3.781426 | -0.471951 |
| H | 6.131016  | -1.677501 | -1.642516 |
| H | 5.062676  | 0.443485  | -0.998111 |
| H | 2.640581  | 0.734132  | 1.873726  |
| H | 3.949952  | 1.620616  | 1.121312  |
| H | 2.772038  | 1.501324  | -1.074968 |
| H | -0.219565 | 1.085438  | 1.170512  |
| H | -1.926779 | 1.289429  | -1.733574 |
| H | -4.828646 | 1.029102  | -2.655885 |
| H | -3.469313 | 1.624770  | -3.605952 |
| H | -3.527897 | -0.070613 | -3.108431 |
| H | -4.354689 | 2.930704  | -0.901986 |
| H | -3.008579 | 3.461849  | -1.910961 |
| H | -2.737149 | 3.068147  | -0.208637 |

|   |           |           |           |
|---|-----------|-----------|-----------|
| H | -5.381939 | 0.827691  | -0.390118 |
| H | -5.934580 | -0.549658 | 1.569102  |
| H | -4.157653 | -1.721424 | 2.796150  |
| H | -0.576968 | -1.791013 | 1.757482  |
| H | -0.478323 | -1.532249 | 4.202723  |
| H | -1.008555 | -0.016028 | 3.462559  |
| H | -2.180431 | -1.066657 | 4.253298  |
| H | -1.013498 | -3.768537 | 3.106041  |
| H | -2.031634 | -3.842473 | 1.663934  |
| H | -2.728946 | -3.392658 | 3.220254  |
| H | -1.065708 | -0.443789 | -2.290866 |
| H | -2.585981 | -2.358170 | -2.460214 |
| H | -2.014403 | -3.968358 | -2.029657 |
| H | -2.440765 | -2.822273 | -0.763776 |
| H | -0.075437 | -3.133559 | 0.270892  |
| H | 0.247298  | -4.304899 | -0.998921 |
| H | 1.359973  | -2.971696 | -0.741850 |
| H | 1.106913  | -2.409544 | -3.249284 |
| H | -0.500810 | -2.107050 | -3.925592 |
| H | -0.037418 | -3.732360 | -3.422758 |
| H | 1.764997  | -1.062333 | -1.511436 |
| H | 1.156009  | 0.277261  | -2.494556 |
| H | 1.664519  | 3.404754  | -1.913133 |
| H | 0.879706  | 5.705807  | -1.518834 |
| H | 0.543131  | 6.525184  | 0.798401  |
| H | 1.011408  | 5.021589  | 2.711259  |
| H | 1.800455  | 2.735291  | 2.328165  |

B3LYP energy = -1393.22043024 a.u.

(5*R*,1'*S*)-**5b**, Conf. A

|   |           |           |           |
|---|-----------|-----------|-----------|
| C | 2.563685  | -3.169579 | 1.492858  |
| C | 1.944662  | -4.374830 | 1.805308  |
| C | 1.307188  | -5.112328 | 0.810228  |
| C | 1.298529  | -4.636983 | -0.496499 |
| C | 1.918507  | -3.428193 | -0.805101 |
| C | 2.554651  | -2.675629 | 0.183487  |
| C | 3.246255  | -1.371408 | -0.146913 |
| C | 2.586447  | -0.130082 | 0.490395  |
| N | 1.245540  | 0.140308  | -0.085617 |
| C | 0.109631  | 0.028374  | 0.553047  |
| N | -0.963905 | 0.355990  | -0.143423 |
| C | -2.257839 | 0.566833  | 0.486426  |
| C | -3.076060 | -0.543623 | 0.772217  |
| C | -2.639754 | -1.988090 | 0.563054  |
| C | -2.367555 | -2.676200 | 1.914125  |
| C | -3.649404 | -2.802369 | -0.261567 |
| C | -4.331308 | -0.293409 | 1.329545  |
| C | -4.757810 | 0.997586  | 1.598421  |
| C | -3.912880 | 2.069355  | 1.356416  |
| C | -2.638594 | 1.881921  | 0.819305  |
| C | -1.719496 | 3.092755  | 0.684983  |
| C | -2.271183 | 4.142092  | -0.294343 |
| C | -1.441035 | 3.726443  | 2.060290  |
| C | -0.543005 | 0.840752  | -1.514967 |

|   |           |           |           |
|---|-----------|-----------|-----------|
| C | -1.210976 | 0.192002  | -2.760992 |
| C | -0.956780 | -1.317817 | -2.866533 |
| C | -0.599327 | 0.898431  | -3.990985 |
| C | -2.725026 | 0.464298  | -2.768025 |
| C | 1.002539  | 0.659265  | -1.445399 |
| C | 3.436161  | 1.132670  | 0.443428  |
| C | 3.364473  | 2.032577  | 1.509836  |
| C | 4.114869  | 3.202975  | 1.505288  |
| C | 4.949233  | 3.490336  | 0.428922  |
| C | 5.030301  | 2.599906  | -0.636539 |
| C | 4.279894  | 1.427330  | -0.629216 |
| H | 3.075240  | -2.618189 | 2.274413  |
| H | 1.969524  | -4.744398 | 2.823137  |
| H | 0.830444  | -6.054215 | 1.051413  |
| H | 0.816604  | -5.209137 | -1.279795 |
| H | 1.920148  | -3.079758 | -1.831485 |
| H | 4.273242  | -1.396998 | 0.224608  |
| H | 3.313872  | -1.251237 | -1.229086 |
| H | 2.393040  | -0.360017 | 1.538305  |
| H | 0.052228  | -0.287685 | 1.585155  |
| H | -1.700327 | -1.984481 | 0.011943  |
| H | -1.984990 | -3.685747 | 1.751585  |
| H | -1.632849 | -2.128696 | 2.508298  |
| H | -3.280553 | -2.753845 | 2.508124  |
| H | -3.255511 | -3.803645 | -0.446931 |
| H | -3.853550 | -2.336145 | -1.226549 |
| H | -4.599870 | -2.915750 | 0.262682  |
| H | -4.985311 | -1.124862 | 1.556794  |
| H | -5.742031 | 1.167075  | 2.017127  |
| H | -4.240020 | 3.069621  | 1.609238  |
| H | -0.755050 | 2.759295  | 0.302320  |
| H | -1.565712 | 4.969234  | -0.396478 |
| H | -2.445605 | 3.721533  | -1.286279 |
| H | -3.217350 | 4.555080  | 0.060298  |
| H | -0.720129 | 4.540137  | 1.957686  |
| H | -1.032678 | 2.995734  | 2.760806  |
| H | -2.349606 | 4.140359  | 2.501022  |
| H | -0.784702 | 1.901585  | -1.554638 |
| H | -1.374430 | -1.863619 | -2.021914 |
| H | -1.429186 | -1.702797 | -3.771915 |
| H | 0.105130  | -1.559592 | -2.933042 |
| H | -0.758712 | 1.978788  | -3.952389 |
| H | 0.472453  | 0.715725  | -4.090345 |
| H | -1.076945 | 0.525177  | -4.897969 |
| H | -3.241818 | -0.031232 | -1.948491 |
| H | -3.154198 | 0.096241  | -3.701674 |
| H | -2.939909 | 1.533043  | -2.705879 |
| H | 1.367557  | -0.053961 | -2.180831 |
| H | 1.537677  | 1.597718  | -1.577123 |
| H | 2.725507  | 1.812440  | 2.357724  |
| H | 4.053986  | 3.884913  | 2.344233  |
| H | 5.537648  | 4.399243  | 0.424183  |
| H | 5.682675  | 2.812832  | -1.474108 |
| H | 4.368659  | 0.743985  | -1.463897 |

B3LYP energy = -1393.22245278 a.u.

(5*R*,1'*S*)-**5b**, Conf. B

|   |           |           |           |
|---|-----------|-----------|-----------|
| C | 2.564218  | 3.180621  | -1.502755 |
| C | 1.938451  | 4.384576  | -1.806926 |
| C | 1.299301  | 5.113243  | -0.806370 |
| C | 1.294742  | 4.630426  | 0.497697  |
| C | 1.921563  | 3.423162  | 0.797741  |
| C | 2.560183  | 2.679919  | -0.196128 |
| C | 3.257338  | 1.377331  | 0.127632  |
| C | 2.587067  | 0.133688  | -0.493485 |
| N | 1.246857  | -0.121447 | 0.090394  |
| C | 0.112364  | -0.039950 | -0.555292 |
| N | -0.961675 | -0.348148 | 0.149153  |
| C | -2.250643 | -0.582841 | -0.483294 |
| C | -2.613829 | -1.906083 | -0.802276 |
| C | -1.680885 | -3.103414 | -0.646992 |
| C | -2.262295 | -4.189091 | 0.272900  |
| C | -1.312809 | -3.688999 | -2.022705 |
| C | -3.879342 | -2.114091 | -1.352319 |
| C | -4.733082 | -1.054521 | -1.616731 |
| C | -4.324491 | 0.244263  | -1.357522 |
| C | -3.077693 | 0.514993  | -0.790807 |
| C | -2.658412 | 1.966297  | -0.594937 |
| C | -2.383216 | 2.642671  | -1.951297 |
| C | -3.683467 | 2.777667  | 0.213270  |
| C | -0.539950 | -0.797105 | 1.533209  |
| C | -1.236725 | -0.153029 | 2.765563  |
| C | -0.611170 | -0.823905 | 4.008618  |
| C | -2.741091 | -0.475003 | 2.765581  |
| C | -1.032945 | 1.365630  | 2.856744  |
| C | 1.000481  | -0.573979 | 1.472905  |
| C | 3.429471  | -1.133352 | -0.436422 |
| C | 4.256255  | -1.432982 | 0.648075  |
| C | 4.999690  | -2.609846 | 0.665677  |
| C | 4.928658  | -3.499408 | -0.401298 |
| C | 4.111419  | -3.206954 | -1.489348 |
| C | 3.367626  | -2.032386 | -1.504106 |
| H | 3.076517  | 2.635378  | -2.288143 |
| H | 1.959371  | 4.760224  | -2.822604 |
| H | 0.817698  | 6.054239  | -1.041277 |
| H | 0.810979  | 5.195491  | 1.284982  |
| H | 1.927043  | 3.066383  | 1.821340  |
| H | 4.278105  | 1.400151  | -0.260549 |
| H | 3.343193  | 1.262693  | 1.209069  |
| H | 2.390542  | 0.354408  | -1.542865 |
| H | 0.056397  | 0.237780  | -1.598412 |
| H | -0.746190 | -2.764775 | -0.201692 |
| H | -1.539570 | -4.997177 | 0.402875  |
| H | -2.510446 | -3.793999 | 1.259629  |
| H | -3.170888 | -4.623603 | -0.148003 |
| H | -0.598098 | -4.505893 | -1.903226 |
| H | -0.860222 | -2.932487 | -2.666775 |
| H | -2.190735 | -4.084499 | -2.536375 |
| H | -4.192504 | -3.120706 | -1.597574 |
| H | -5.710355 | -1.239859 | -2.044918 |
| H | -4.985532 | 1.065593  | -1.601008 |

|   |           |           |           |
|---|-----------|-----------|-----------|
| H | -1.722794 | 1.978723  | -0.037428 |
| H | -2.015157 | 3.658862  | -1.796703 |
| H | -1.635927 | 2.098104  | -2.532353 |
| H | -3.291674 | 2.702129  | -2.554290 |
| H | -3.302042 | 3.784921  | 0.392355  |
| H | -3.890872 | 2.318291  | 1.180865  |
| H | -4.630576 | 2.875591  | -0.320116 |
| H | -0.751351 | -1.864224 | 1.587308  |
| H | 0.453011  | -0.603649 | 4.113268  |
| H | -1.108080 | -0.455450 | 4.907171  |
| H | -0.734376 | -1.909382 | 3.982832  |
| H | -3.268078 | -0.005112 | 1.937402  |
| H | -2.919757 | -1.550991 | 2.713123  |
| H | -3.188251 | -0.111735 | 3.692584  |
| H | -1.459364 | 1.889766  | 2.003019  |
| H | 0.019493  | 1.643424  | 2.932627  |
| H | -1.527460 | 1.743280  | 3.753399  |
| H | 1.331967  | 0.191290  | 2.171305  |
| H | 1.561458  | -1.485845 | 1.666685  |
| H | 4.336942  | -0.750037 | 1.484093  |
| H | 5.638933  | -2.826828 | 1.512290  |
| H | 5.511790  | -4.411641 | -0.388586 |
| H | 4.058524  | -3.888400 | -2.329230 |
| H | 2.741395  | -1.808564 | -2.360539 |

B3LYP energy = -1393.22243743 a.u.

(5*R*,1'*S*)-**5b**, Conf. C

|   |           |           |           |
|---|-----------|-----------|-----------|
| C | 4.320843  | 2.589424  | -0.457636 |
| C | 5.657183  | 2.971556  | -0.507083 |
| C | 6.565136  | 2.454992  | 0.413611  |
| C | 6.127046  | 1.557702  | 1.382160  |
| C | 4.789107  | 1.176059  | 1.428046  |
| C | 3.871395  | 1.684614  | 0.508122  |
| C | 2.416491  | 1.270897  | 0.546450  |
| C | 2.075014  | 0.223004  | -0.534350 |
| N | 0.611542  | 0.050142  | -0.671416 |
| C | -0.335241 | 0.395637  | 0.161827  |
| N | -1.556428 | 0.043518  | -0.201594 |
| C | -2.738334 | 0.602086  | 0.434981  |
| C | -3.183647 | 0.064914  | 1.658817  |
| C | -2.430348 | -1.010588 | 2.431399  |
| C | -1.781147 | -0.417106 | 3.696226  |
| C | -3.315821 | -2.213024 | 2.796380  |
| C | -4.348457 | 0.599341  | 2.211920  |
| C | -5.039746 | 1.625433  | 1.587266  |
| C | -4.550736 | 2.173135  | 0.411681  |
| C | -3.380761 | 1.694773  | -0.179557 |
| C | -2.836641 | 2.418102  | -1.407849 |
| C | -3.795261 | 2.338164  | -2.607703 |
| C | -2.498383 | 3.883586  | -1.077617 |
| C | -1.503707 | -0.660923 | -1.540530 |
| C | -2.165511 | -2.064191 | -1.649896 |
| C | -3.681362 | -1.967529 | -1.403995 |
| C | -1.549863 | -3.097165 | -0.695400 |
| C | -1.952349 | -2.527574 | -3.107650 |

|   |           |           |           |
|---|-----------|-----------|-----------|
| C | 0.024202  | -0.647902 | -1.831463 |
| C | 2.755751  | -1.121683 | -0.325202 |
| C | 2.431151  | -1.933925 | 0.763549  |
| C | 3.077282  | -3.149876 | 0.953262  |
| C | 4.058345  | -3.567535 | 0.056911  |
| C | 4.386405  | -2.764871 | -1.029884 |
| C | 3.734928  | -1.549117 | -1.220575 |
| H | 3.619510  | 3.008641  | -1.171245 |
| H | 5.987722  | 3.677888  | -1.258745 |
| H | 7.605226  | 2.754425  | 0.378789  |
| H | 6.825524  | 1.155364  | 2.105509  |
| H | 4.457616  | 0.478134  | 2.187820  |
| H | 2.177861  | 0.873013  | 1.534531  |
| H | 1.791912  | 2.153117  | 0.382792  |
| H | 2.400637  | 0.619147  | -1.498462 |
| H | -0.149392 | 0.942764  | 1.073744  |
| H | -1.623935 | -1.381141 | 1.799509  |
| H | -2.539794 | -0.069410 | 4.400158  |
| H | -1.177506 | -1.173819 | 4.201881  |
| H | -1.136423 | 0.433144  | 3.462343  |
| H | -2.713114 | -2.986676 | 3.276551  |
| H | -3.788205 | -2.650534 | 1.915739  |
| H | -4.105771 | -1.932175 | 3.495122  |
| H | -4.718587 | 0.206853  | 3.149986  |
| H | -5.948321 | 2.014361  | 2.029873  |
| H | -5.075361 | 3.002982  | -0.043880 |
| H | -1.898642 | 1.948605  | -1.702921 |
| H | -3.352119 | 2.827723  | -3.477377 |
| H | -4.022713 | 1.305418  | -2.878571 |
| H | -4.740872 | 2.838717  | -2.391652 |
| H | -2.040806 | 4.365667  | -1.944085 |
| H | -1.800689 | 3.952714  | -0.240748 |
| H | -3.392554 | 4.451595  | -0.815331 |
| H | -2.016976 | -0.017694 | -2.253074 |
| H | -4.150013 | -1.246425 | -2.077214 |
| H | -4.142133 | -2.939448 | -1.589555 |
| H | -3.920122 | -1.678475 | -0.382193 |
| H | -0.477885 | -3.230096 | -0.852376 |
| H | -1.709376 | -2.832177 | 0.348698  |
| H | -2.020024 | -4.068077 | -0.860440 |
| H | -2.369349 | -1.810993 | -3.819398 |
| H | -2.458096 | -3.481691 | -3.262484 |
| H | -0.898596 | -2.676487 | -3.350634 |
| H | 0.446373  | -1.648235 | -1.896861 |
| H | 0.275270  | -0.106656 | -2.743133 |
| H | 1.671886  | -1.624539 | 1.472878  |
| H | 2.817598  | -3.770968 | 1.801431  |
| H | 4.562796  | -4.513861 | 0.206362  |
| H | 5.147914  | -3.082277 | -1.731128 |
| H | 3.995934  | -0.926514 | -2.068441 |

B3LYP energy = -1393.22221945 a.u.

(5*R*,1'*S*)-**5b**, Conf. D

|   |          |           |          |
|---|----------|-----------|----------|
| C | 4.870009 | -0.627069 | 0.353153 |
| C | 5.414417 | -1.848177 | 0.735837 |

|   |           |           |           |
|---|-----------|-----------|-----------|
| C | 4.939514  | -3.031839 | 0.176050  |
| C | 3.921983  | -2.983829 | -0.771307 |
| C | 3.378505  | -1.758957 | -1.151596 |
| C | 3.840487  | -0.566102 | -0.591287 |
| C | 3.245478  | 0.763435  | -0.995709 |
| C | 2.301992  | 1.387704  | 0.056016  |
| N | 1.130943  | 0.506352  | 0.330483  |
| C | -0.024387 | 0.522670  | -0.281541 |
| N | -0.933007 | -0.302080 | 0.209430  |
| C | -2.160819 | -0.613433 | -0.506444 |
| C | -3.261043 | 0.261081  | -0.407776 |
| C | -3.217344 | 1.598835  | 0.320227  |
| C | -3.245045 | 2.765542  | -0.685357 |
| C | -4.347217 | 1.752220  | 1.351381  |
| C | -4.436533 | -0.104708 | -1.066182 |
| C | -4.521361 | -1.280110 | -1.795540 |
| C | -3.408464 | -2.096257 | -1.922029 |
| C | -2.199483 | -1.774282 | -1.304213 |
| C | -0.984107 | -2.653366 | -1.579823 |
| C | -1.178484 | -4.096159 | -1.085671 |
| C | -0.622801 | -2.634652 | -3.076587 |
| C | -0.325088 | -1.098599 | 1.346972  |
| C | -1.097063 | -1.162418 | 2.695956  |
| C | -1.305474 | 0.217061  | 3.337117  |
| C | -0.239849 | -2.034766 | 3.639066  |
| C | -2.455619 | -1.861388 | 2.515307  |
| C | 1.087565  | -0.454723 | 1.450570  |
| C | 1.853738  | 2.804551  | -0.268653 |
| C | 1.676725  | 3.711495  | 0.779929  |
| C | 1.250883  | 5.011406  | 0.532234  |
| C | 0.995299  | 5.424050  | -0.772469 |
| C | 1.172206  | 4.531215  | -1.823864 |
| C | 1.601153  | 3.230074  | -1.574781 |
| H | 5.258513  | 0.288786  | 0.784994  |
| H | 6.216583  | -1.875367 | 1.463086  |
| H | 5.367389  | -3.982576 | 0.468565  |
| H | 3.556787  | -3.898391 | -1.222337 |
| H | 2.594875  | -1.730929 | -1.900612 |
| H | 4.043140  | 1.489659  | -1.165941 |
| H | 2.714912  | 0.649549  | -1.942160 |
| H | 2.833271  | 1.422307  | 1.008011  |
| H | -0.225171 | 1.162982  | -1.128088 |
| H | -2.273688 | 1.663124  | 0.860778  |
| H | -3.141730 | 3.717768  | -0.161093 |
| H | -2.437145 | 2.691489  | -1.416011 |
| H | -4.187391 | 2.786439  | -1.236593 |
| H | -4.220564 | 2.684420  | 1.905698  |
| H | -4.355313 | 0.930775  | 2.069068  |
| H | -5.326939 | 1.786684  | 0.871968  |
| H | -5.300438 | 0.544159  | -1.007057 |
| H | -5.449369 | -1.548885 | -2.284718 |
| H | -3.472957 | -2.989828 | -2.529381 |
| H | -0.125544 | -2.237562 | -1.053735 |
| H | -0.268880 | -4.676979 | -1.251967 |
| H | -1.415247 | -4.132175 | -0.020883 |
| H | -1.990279 | -4.591286 | -1.621597 |



|   |           |           |           |
|---|-----------|-----------|-----------|
| H | 0.294004  | -3.202669 | -3.247783 |
| H | -0.465286 | -1.615799 | -3.436135 |
| H | -1.410197 | -3.085075 | -3.683410 |
| H | -0.231154 | -2.124032 | 0.991324  |
| H | -1.921220 | 0.867177  | 2.718168  |
| H | -1.815384 | 0.098108  | 4.294541  |
| H | -0.364649 | 0.732185  | 3.540662  |
| H | -0.065708 | -3.027370 | 3.216936  |
| H | 0.729011  | -1.583556 | 3.861701  |
| H | -0.763033 | -2.164909 | 4.587490  |
| H | -3.136315 | -1.293622 | 1.884026  |
| H | -2.931626 | -1.984923 | 3.489777  |
| H | -2.338362 | -2.855294 | 2.078476  |
| H | 1.230089  | 0.090404  | 2.382635  |
| H | 1.886561  | -1.184403 | 1.346277  |
| H | 1.882715  | 3.401330  | 1.798024  |
| H | 1.125705  | 5.702762  | 1.356141  |
| H | 0.667159  | 6.437080  | -0.968383 |
| H | 0.984167  | 4.847007  | -2.842350 |
| H | 1.744531  | 2.558525  | -2.411423 |

B3LYP energy = -1393.22125304 a.u.

(5R,1'S)-**5b**, Conf. E

|   |           |           |           |
|---|-----------|-----------|-----------|
| C | 5.318950  | -0.167446 | -1.212735 |
| C | 6.674647  | -0.102038 | -0.902853 |
| C | 7.195776  | -0.883233 | 0.123547  |
| C | 6.354792  | -1.735184 | 0.834568  |
| C | 5.001692  | -1.800536 | 0.519713  |
| C | 4.465343  | -1.014406 | -0.504357 |
| C | 2.989118  | -1.090745 | -0.826365 |
| C | 2.123346  | -0.313196 | 0.193017  |
| N | 0.683320  | -0.648770 | 0.002795  |
| C | -0.329166 | 0.182284  | 0.005089  |
| N | -1.522217 | -0.383403 | 0.037224  |
| C | -2.733209 | 0.358968  | -0.277283 |
| C | -3.339381 | 1.149331  | 0.718676  |
| C | -2.738827 | 1.373480  | 2.100794  |
| C | -2.176064 | 2.802332  | 2.223128  |
| C | -3.733202 | 1.086395  | 3.237188  |
| C | -4.524895 | 1.807445  | 0.386445  |
| C | -5.082698 | 1.696771  | -0.877457 |
| C | -4.436842 | 0.957843  | -1.856286 |
| C | -3.239360 | 0.292616  | -1.590250 |
| C | -2.515283 | -0.397871 | -2.741318 |
| C | -3.355503 | -1.515305 | -3.380744 |
| C | -2.072128 | 0.629920  | -3.799013 |
| C | -1.369789 | -1.887792 | 0.051574  |
| C | -2.098088 | -2.688313 | 1.169034  |
| C | -3.622700 | -2.533900 | 1.033310  |
| C | -1.658413 | -2.289640 | 2.584839  |
| C | -1.749963 | -4.173415 | 0.927197  |
| C | 0.178066  | -2.036789 | 0.059484  |
| C | 2.348222  | 1.185886  | 0.170575  |
| C | 2.226504  | 1.927495  | -1.008827 |
| C | 2.444502  | 3.300410  | -1.004127 |

|   |           |           |           |
|---|-----------|-----------|-----------|
| C | 2.794700  | 3.949418  | 0.177434  |
| C | 2.921535  | 3.219492  | 1.353963  |
| C | 2.695875  | 1.845740  | 1.349546  |
| H | 4.923383  | 0.444209  | -2.014675 |
| H | 7.323135  | 0.558421  | -1.465311 |
| H | 8.250457  | -0.833899 | 0.364296  |
| H | 6.754028  | -2.354710 | 1.628315  |
| H | 4.358545  | -2.479542 | 1.069500  |
| H | 2.797136  | -0.712099 | -1.831298 |
| H | 2.686239  | -2.139109 | -0.817231 |
| H | 2.376177  | -0.678604 | 1.191775  |
| H | -0.202075 | 1.253504  | -0.031057 |
| H | -1.901222 | 0.688480  | 2.224115  |
| H | -2.970395 | 3.546626  | 2.137925  |
| H | -1.693912 | 2.935699  | 3.193852  |
| H | -1.438409 | 3.016400  | 1.446724  |
| H | -3.231924 | 1.181589  | 4.202541  |
| H | -4.146227 | 0.078920  | 3.168642  |
| H | -4.567026 | 1.790342  | 3.230691  |
| H | -5.016867 | 2.420843  | 1.129764  |
| H | -6.009778 | 2.207165  | -1.107156 |
| H | -4.858940 | 0.915560  | -2.852075 |
| H | -1.602468 | -0.853701 | -2.358732 |
| H | -2.777150 | -2.027623 | -4.152387 |
| H | -3.670824 | -2.256307 | -2.643852 |
| H | -4.254403 | -1.115423 | -3.853479 |
| H | -1.484284 | 0.138641  | -4.577361 |
| H | -1.460317 | 1.418095  | -3.355376 |
| H | -2.929839 | 1.104358  | -4.278894 |
| H | -1.764184 | -2.252895 | -0.895353 |
| H | -3.964434 | -2.821688 | 0.036587  |
| H | -4.120064 | -3.184786 | 1.754676  |
| H | -3.956110 | -1.515057 | 1.221813  |
| H | -0.582502 | -2.396113 | 2.737682  |
| H | -1.934016 | -1.264102 | 2.824306  |
| H | -2.149487 | -2.937753 | 3.312594  |
| H | -2.030088 | -4.490283 | -0.080385 |
| H | -2.299794 | -4.794602 | 1.635561  |
| H | -0.687918 | -4.383715 | 1.067790  |
| H | 0.546991  | -2.511619 | 0.967809  |
| H | 0.535715  | -2.603145 | -0.797001 |
| H | 1.961444  | 1.438613  | -1.939012 |
| H | 2.347754  | 3.863000  | -1.924169 |
| H | 2.970748  | 5.017702  | 0.178297  |
| H | 3.198648  | 3.715859  | 2.275404  |
| H | 2.801185  | 1.281853  | 2.268967  |

B3LYP energy = -1393.22115871 a.u.

(5R,1'S)-**5b**, Conf. F

|   |           |           |           |
|---|-----------|-----------|-----------|
| C | -4.189507 | -2.343947 | -0.944700 |
| C | -5.399321 | -2.726588 | -1.513670 |
| C | -6.596872 | -2.225373 | -1.009952 |
| C | -6.574053 | -1.343886 | 0.065701  |
| C | -5.360789 | -0.962002 | 0.631862  |
| C | -4.153641 | -1.454221 | 0.133370  |

|   |           |           |           |
|---|-----------|-----------|-----------|
| C | -2.827684 | -1.046342 | 0.738554  |
| C | -2.066454 | -0.020259 | -0.130056 |
| N | -0.646642 | 0.062805  | 0.300220  |
| C | 0.387452  | -0.206578 | -0.453405 |
| N | 1.561373  | -0.094486 | 0.141160  |
| C | 2.810735  | -0.087711 | -0.601748 |
| C | 3.365719  | -1.307125 | -1.038643 |
| C | 2.680537  | -2.659070 | -0.874965 |
| C | 2.204889  | -3.201909 | -2.235908 |
| C | 3.571279  | -3.695500 | -0.170116 |
| C | 4.591905  | -1.255190 | -1.703855 |
| C | 5.238978  | -0.051444 | -1.933889 |
| C | 4.645462  | 1.138392  | -1.542503 |
| C | 3.411216  | 1.153700  | -0.891609 |
| C | 2.758152  | 2.500429  | -0.595496 |
| C | 3.596264  | 3.361399  | 0.363779  |
| C | 2.462913  | 3.264598  | -1.899406 |
| C | 1.359214  | 0.349144  | 1.574515  |
| C | 1.962054  | -0.544178 | 2.696239  |
| C | 1.389022  | -1.968857 | 2.697546  |
| C | 1.617243  | 0.145799  | 4.034044  |
| C | 3.495007  | -0.594327 | 2.578057  |
| C | -0.190024 | 0.494808  | 1.634959  |
| C | -2.679902 | 1.370015  | -0.204728 |
| C | -2.711101 | 2.024562  | -1.437950 |
| C | -3.233180 | 3.308545  | -1.550893 |
| C | -3.729766 | 3.958563  | -0.425261 |
| C | -3.704165 | 3.315860  | 0.808382  |
| C | -3.185439 | 2.029054  | 0.918079  |
| H | -3.264486 | -2.753154 | -1.336924 |
| H | -5.407936 | -3.421305 | -2.344645 |
| H | -7.540176 | -2.524654 | -1.449581 |
| H | -7.500829 | -0.953593 | 0.468034  |
| H | -5.356587 | -0.278647 | 1.472507  |
| H | -2.985805 | -0.650915 | 1.742477  |
| H | -2.189078 | -1.927278 | 0.841852  |
| H | -2.021642 | -0.416624 | -1.144743 |
| H | 0.293808  | -0.485119 | -1.493626 |
| H | 1.794034  | -2.520271 | -0.257252 |
| H | 1.658260  | -4.137197 | -2.097983 |
| H | 1.547852  | -2.497043 | -2.749454 |
| H | 3.050904  | -3.403426 | -2.895844 |
| H | 3.007752  | -4.614887 | 0.001644  |
| H | 3.930420  | -3.334788 | 0.794490  |
| H | 4.442124  | -3.953401 | -0.775364 |
| H | 5.046706  | -2.174323 | -2.048917 |
| H | 6.196356  | -0.038806 | -2.439820 |
| H | 5.139268  | 2.075029  | -1.766717 |
| H | 1.792815  | 2.324942  | -0.121770 |
| H | 3.069647  | 4.290092  | 0.592795  |
| H | 3.796867  | 2.844439  | 1.304080  |
| H | 4.558093  | 3.626939  | -0.078992 |
| H | 1.933627  | 4.193379  | -1.676696 |
| H | 1.841466  | 2.673424  | -2.574992 |
| H | 3.381652  | 3.522961  | -2.428624 |
| H | 1.824298  | 1.328199  | 1.671210  |

|   |           |           |           |
|---|-----------|-----------|-----------|
| H | 1.638247  | -2.511437 | 1.786837  |
| H | 1.807120  | -2.529293 | 3.535375  |
| H | 0.303228  | -1.983120 | 2.813513  |
| H | 1.999402  | 1.168974  | 4.064057  |
| H | 0.543726  | 0.177140  | 4.229001  |
| H | 2.079096  | -0.405359 | 4.854363  |
| H | 3.826604  | -1.093421 | 1.669833  |
| H | 3.907438  | -1.141543 | 3.427707  |
| H | 3.928270  | 0.408358  | 2.588480  |
| H | -0.634114 | -0.142054 | 2.396005  |
| H | -0.504850 | 1.521494  | 1.812856  |
| H | -2.332429 | 1.522410  | -2.321074 |
| H | -3.257363 | 3.797169  | -2.516842 |
| H | -4.139226 | 4.957333  | -0.509640 |
| H | -4.094096 | 3.813068  | 1.687757  |
| H | -3.190435 | 1.545926  | 1.886969  |

B3LYP energy = -1393.22114490 a.u.

(5S,1'S)-8a, Conf. A

|   |           |           |           |
|---|-----------|-----------|-----------|
| C | -3.501481 | -1.294052 | 0.803072  |
| C | -4.461046 | -2.280691 | 0.579633  |
| C | -5.303596 | -2.190232 | -0.524687 |
| C | -5.200190 | -1.122467 | -1.404965 |
| C | -4.247340 | -0.134582 | -1.170742 |
| C | -3.389465 | -0.197355 | -0.075428 |
| C | -2.345472 | 0.867728  | 0.217315  |
| C | -2.715538 | 2.279861  | -0.275268 |
| C | -1.772548 | 3.363668  | 0.198241  |
| C | -0.967765 | 4.059785  | -0.705130 |
| C | -0.117557 | 5.074501  | -0.271647 |
| C | -0.059757 | 5.407509  | 1.077125  |
| C | -0.859375 | 4.722418  | 1.988795  |
| C | -1.708391 | 3.711572  | 1.551552  |
| N | -1.021485 | 0.446433  | -0.304146 |
| C | -0.004298 | 0.067230  | 0.425352  |
| N | 1.027576  | -0.406239 | -0.252398 |
| C | 2.333575  | -0.615561 | 0.352262  |
| C | 3.323286  | 0.373915  | 0.184551  |
| C | 3.071930  | 1.727164  | -0.472201 |
| C | 3.310432  | 2.874852  | 0.526200  |
| C | 3.921244  | 1.928422  | -1.739126 |
| C | 4.592856  | 0.116025  | 0.703224  |
| C | 4.863524  | -1.049407 | 1.402137  |
| C | 3.853976  | -1.973544 | 1.618046  |
| C | 2.569828  | -1.783456 | 1.104614  |
| C | 1.497248  | -2.814804 | 1.433762  |
| C | 1.901429  | -4.241916 | 1.028537  |
| C | 1.137859  | -2.763472 | 2.930152  |
| C | 0.726763  | -0.338376 | -1.735253 |
| C | 0.899316  | -1.636244 | -2.576171 |
| C | 2.365588  | -2.100701 | -2.560345 |
| C | 0.541971  | -1.255824 | -4.029394 |
| C | -0.015230 | -2.779573 | -2.113454 |
| C | -0.720998 | 0.231928  | -1.731181 |

|   |           |           |           |
|---|-----------|-----------|-----------|
| C | -2.799695 | -2.301339 | 2.872776  |
| O | -2.626635 | -1.313657 | 1.851497  |
| H | -4.559844 | -3.118115 | 1.254825  |
| H | -6.043659 | -2.963449 | -0.689019 |
| H | -5.857026 | -1.049681 | -2.261744 |
| H | -4.187481 | 0.702789  | -1.853744 |
| H | -2.212605 | 0.911464  | 1.296921  |
| H | -2.781735 | 2.304208  | -1.363700 |
| H | -3.722737 | 2.479476  | 0.097099  |
| H | -1.017359 | 3.821889  | -1.761806 |
| H | 0.492426  | 5.608816  | -0.989692 |
| H | 0.596617  | 6.199300  | 1.415879  |
| H | -0.830559 | 4.983785  | 3.039548  |
| H | -2.341037 | 3.201311  | 2.269640  |
| H | -0.004684 | 0.145508  | 1.502954  |
| H | 2.023382  | 1.789016  | -0.761184 |
| H | 3.056458  | 3.830285  | 0.063489  |
| H | 2.695166  | 2.759577  | 1.420371  |
| H | 4.354862  | 2.921929  | 0.839534  |
| H | 4.986451  | 1.942774  | -1.500510 |
| H | 3.674794  | 2.882218  | -2.210113 |
| H | 3.758280  | 1.135799  | -2.472071 |
| H | 5.376283  | 0.851726  | 0.575685  |
| H | 5.855735  | -1.227188 | 1.797936  |
| H | 4.065438  | -2.861853 | 2.198788  |
| H | 0.595438  | -2.562177 | 0.877647  |
| H | 1.070813  | -4.928170 | 1.206223  |
| H | 2.170037  | -4.303289 | -0.026828 |
| H | 2.752196  | -4.598973 | 1.611331  |
| H | 0.337932  | -3.473064 | 3.150746  |
| H | 0.803503  | -1.768684 | 3.231287  |
| H | 1.997520  | -3.024879 | 3.550196  |
| H | 1.406434  | 0.399062  | -2.158885 |
| H | 3.038636  | -1.306009 | -2.889213 |
| H | 2.487038  | -2.941306 | -3.245921 |
| H | 2.688327  | -2.427951 | -1.574156 |
| H | -0.502505 | -0.958179 | -4.139675 |
| H | 1.170744  | -0.439755 | -4.393947 |
| H | 0.704878  | -2.116137 | -4.680296 |
| H | -1.074301 | -2.524909 | -2.185171 |
| H | 0.146086  | -3.652662 | -2.748184 |
| H | 0.192111  | -3.078994 | -1.087429 |
| H | -0.791993 | 1.172138  | -2.274253 |
| H | -1.444894 | -0.464586 | -2.148352 |
| H | -3.798024 | -2.240340 | 3.310665  |
| H | -2.055790 | -2.075712 | 3.631773  |
| H | -2.627409 | -3.306991 | 2.483064  |

B3LYP energy = -1507.78938887 a.u.

(5S,1'S)-8a, Conf. B

|   |          |          |           |
|---|----------|----------|-----------|
| C | 2.421439 | 2.047250 | -0.392582 |
| C | 3.063808 | 3.283152 | -0.329394 |
| C | 3.928537 | 3.566640 | 0.724746  |
| C | 4.157803 | 2.627676 | 1.719999  |
| C | 3.513273 | 1.396219 | 1.650446  |

|   |           |           |           |
|---|-----------|-----------|-----------|
| C | 2.647409  | 1.080592  | 0.606437  |
| C | 1.992401  | -0.289326 | 0.575681  |
| C | 2.365177  | -1.179116 | -0.632862 |
| C | 3.827026  | -1.567189 | -0.625454 |
| C | 4.751750  | -0.904561 | -1.434086 |
| C | 6.096870  | -1.262690 | -1.418184 |
| C | 6.536271  | -2.291864 | -0.591536 |
| C | 5.622461  | -2.962522 | 0.217093  |
| C | 4.279137  | -2.602478 | 0.197702  |
| N | 0.523973  | -0.182383 | 0.742967  |
| C | -0.407409 | -0.289095 | -0.167349 |
| N | -1.643623 | -0.166232 | 0.284672  |
| C | -2.795426 | -0.071572 | -0.593874 |
| C | -3.257173 | -1.224253 | -1.262834 |
| C | -2.561504 | -2.580181 | -1.207365 |
| C | -3.507880 | -3.713194 | -0.776361 |
| C | -1.904036 | -2.916773 | -2.559336 |
| C | -4.398750 | -1.096383 | -2.055888 |
| C | -5.058292 | 0.115469  | -2.185568 |
| C | -4.556664 | 1.244210  | -1.557299 |
| C | -3.405816 | 1.186223  | -0.770425 |
| C | -2.847657 | 2.486987  | -0.202821 |
| C | -2.490008 | 3.470651  | -1.331641 |
| C | -3.806151 | 3.144733  | 0.804060  |
| C | -1.615675 | 0.076800  | 1.779316  |
| C | -2.356541 | -0.946908 | 2.689320  |
| C | -3.860646 | -0.970912 | 2.368238  |
| C | -2.195442 | -0.434781 | 4.137303  |
| C | -1.778390 | -2.365603 | 2.585544  |
| C | -0.084894 | 0.173076  | 2.038150  |
| C | 1.388758  | 2.588080  | -2.501063 |
| O | 1.554532  | 1.699313  | -1.391270 |
| H | 2.898642  | 4.028122  | -1.093726 |
| H | 4.421278  | 4.530273  | 0.758319  |
| H | 4.830626  | 2.844618  | 2.539082  |
| H | 3.693869  | 0.655939  | 2.421206  |
| H | 2.324155  | -0.818830 | 1.470673  |
| H | 1.756303  | -2.085997 | -0.581315 |
| H | 2.125427  | -0.666395 | -1.562906 |
| H | 4.418300  | -0.104545 | -2.084537 |
| H | 6.800091  | -0.739447 | -2.054434 |
| H | 7.581936  | -2.573312 | -0.580605 |
| H | 5.954379  | -3.771068 | 0.856891  |
| H | 3.573874  | -3.140454 | 0.822379  |
| H | -0.192573 | -0.454661 | -1.210512 |
| H | -1.765328 | -2.529623 | -0.465610 |
| H | -2.947436 | -4.643790 | -0.665882 |
| H | -3.993023 | -3.495914 | 0.176163  |
| H | -4.289406 | -3.887256 | -1.517769 |
| H | -1.196459 | -2.146248 | -2.873216 |
| H | -2.653646 | -3.013910 | -3.347123 |
| H | -1.364902 | -3.863974 | -2.491239 |
| H | -4.778820 | -1.963939 | -2.579153 |
| H | -5.951614 | 0.184468  | -2.793776 |
| H | -5.055769 | 2.194525  | -1.696792 |
| H | -1.914918 | 2.268300  | 0.316096  |

|   |           |           |           |
|---|-----------|-----------|-----------|
| H | -2.011838 | 4.359694  | -0.915097 |
| H | -1.803219 | 3.018495  | -2.048857 |
| H | -3.377247 | 3.795543  | -1.877802 |
| H | -3.354289 | 4.047054  | 1.221296  |
| H | -4.052534 | 2.476029  | 1.630815  |
| H | -4.743156 | 3.434281  | 0.324335  |
| H | -2.079398 | 1.044808  | 1.954455  |
| H | -4.299907 | 0.026372  | 2.440974  |
| H | -4.375059 | -1.610863 | 3.087476  |
| H | -4.069096 | -1.358012 | 1.372918  |
| H | -1.155942 | -0.429146 | 4.470044  |
| H | -2.593614 | 0.576697  | 4.248950  |
| H | -2.748755 | -1.085839 | 4.815728  |
| H | -0.724191 | -2.408518 | 2.866055  |
| H | -2.316351 | -3.029473 | 3.264260  |
| H | -1.878744 | -2.776027 | 1.581652  |
| H | 0.227112  | 1.177801  | 2.322069  |
| H | 0.258657  | -0.522448 | 2.800875  |
| H | 0.948789  | 3.536644  | -2.186812 |
| H | 0.711044  | 2.084312  | -3.185406 |
| H | 2.341456  | 2.771362  | -3.002143 |

B3LYP energy = -1507.78780482 a.u.

(5*S*,1'*S*)-**8a**, Conf. C

|   |           |           |           |
|---|-----------|-----------|-----------|
| C | -2.413742 | 2.044769  | -0.619487 |
| C | -2.967277 | 3.302179  | -0.382354 |
| C | -3.672156 | 3.536828  | 0.794860  |
| C | -3.830847 | 2.528454  | 1.735060  |
| C | -3.285623 | 1.271909  | 1.486401  |
| C | -2.578905 | 1.004438  | 0.317680  |
| C | -1.962491 | -0.349527 | 0.012715  |
| C | -2.690173 | -1.580919 | 0.588842  |
| C | -4.059445 | -1.806445 | -0.017100 |
| C | -5.212417 | -1.727994 | 0.765315  |
| C | -6.469326 | -1.954807 | 0.211081  |
| C | -6.591499 | -2.265117 | -1.138996 |
| C | -5.448301 | -2.352221 | -1.929408 |
| C | -4.194705 | -2.127558 | -1.371283 |
| N | -0.535762 | -0.367508 | 0.429028  |
| C | 0.488081  | -0.321211 | -0.382336 |
| N | 1.668383  | -0.222898 | 0.206778  |
| C | 2.910005  | -0.500417 | -0.498432 |
| C | 3.526545  | 0.520581  | -1.247728 |
| C | 2.908803  | 1.894758  | -1.474275 |
| C | 3.851801  | 3.044798  | -1.084545 |
| C | 2.452361  | 2.049788  | -2.937045 |
| C | 4.745852  | 0.225014  | -1.860151 |
| C | 5.326211  | -1.028278 | -1.746548 |
| C | 4.671915  | -2.032848 | -1.050807 |
| C | 3.443453  | -1.802986 | -0.429956 |
| C | 2.722215  | -2.979941 | 0.219851  |
| C | 2.332519  | -4.029512 | -0.837244 |
| C | 3.540791  | -3.619084 | 1.353574  |
| C | 1.479235  | -0.235061 | 1.709706  |
| C | 2.149151  | 0.895649  | 2.540851  |

|   |           |           |           |
|---|-----------|-----------|-----------|
| C | 3.680757  | 0.810614  | 2.423715  |
| C | 1.772337  | 0.627073  | 4.014291  |
| C | 1.671280  | 2.300100  | 2.146096  |
| C | -0.071405 | -0.284259 | 1.826358  |
| C | -1.604215 | 2.698836  | -2.790576 |
| O | -1.689179 | 1.735998  | -1.735391 |
| H | -2.853446 | 4.099703  | -1.101934 |
| H | -4.097004 | 4.517436  | 0.969474  |
| H | -4.381149 | 2.710088  | 2.648804  |
| H | -3.428485 | 0.488165  | 2.218200  |
| H | -1.928700 | -0.458623 | -1.069210 |
| H | -2.057106 | -2.448862 | 0.385035  |
| H | -2.778091 | -1.509913 | 1.673196  |
| H | -5.130511 | -1.492469 | 1.820021  |
| H | -7.351547 | -1.890482 | 0.836135  |
| H | -7.568110 | -2.442275 | -1.572046 |
| H | -5.532255 | -2.603254 | -2.979726 |
| H | -3.314035 | -2.215281 | -1.998180 |
| H | 0.376683  | -0.371922 | -1.455920 |
| H | 2.019822  | 1.975988  | -0.850084 |
| H | 3.333080  | 4.000581  | -1.184518 |
| H | 4.198387  | 2.955355  | -0.054177 |
| H | 4.730532  | 3.080234  | -1.731027 |
| H | 3.302637  | 2.009804  | -3.620791 |
| H | 1.955792  | 3.012279  | -3.076246 |
| H | 1.755401  | 1.262135  | -3.230262 |
| H | 5.246968  | 0.989305  | -2.439597 |
| H | 6.278827  | -1.229414 | -2.220723 |
| H | 5.114120  | -3.019800 | -1.006495 |
| H | 1.788256  | -2.624481 | 0.654175  |
| H | 1.752899  | -4.831479 | -0.375089 |
| H | 1.728503  | -3.586509 | -1.631714 |
| H | 3.214104  | -4.478224 | -1.298293 |
| H | 2.964867  | -4.413865 | 1.832040  |
| H | 3.811534  | -2.888005 | 2.117713  |
| H | 4.464592  | -4.061938 | 0.976995  |
| H | 1.901309  | -1.172641 | 2.068634  |
| H | 4.046129  | -0.180917 | 2.700664  |
| H | 4.138675  | 1.534079  | 3.100621  |
| H | 4.034043  | 1.028826  | 1.417834  |
| H | 0.700046  | 0.722021  | 4.195262  |
| H | 2.085950  | -0.370279 | 4.332118  |
| H | 2.274712  | 1.352814  | 4.655528  |
| H | 0.592869  | 2.425249  | 2.260240  |
| H | 2.148428  | 3.039729  | 2.791335  |
| H | 1.932819  | 2.545869  | 1.118252  |
| H | -0.414713 | -1.152190 | 2.386184  |
| H | -0.482221 | 0.611514  | 2.287386  |
| H | -2.597590 | 2.971088  | -3.152621 |
| H | -1.046297 | 2.215353  | -3.587859 |
| H | -1.070349 | 3.594455  | -2.465588 |

B3LYP energy = -1507.78764834 a.u.

(5*S*,1'*S*)-**8a**, Conf. D

|   |          |          |          |
|---|----------|----------|----------|
| C | 1.612598 | 3.340664 | 0.125770 |
|---|----------|----------|----------|

|   |           |           |           |                                    |           |           |           |
|---|-----------|-----------|-----------|------------------------------------|-----------|-----------|-----------|
| C | 1.304796  | 4.631217  | -0.301288 | H                                  | -5.236615 | 1.430148  | 0.493209  |
| C | 1.308193  | 4.929897  | -1.661515 | H                                  | -6.162329 | -0.046067 | -1.239794 |
| C | 1.618859  | 3.954071  | -2.597421 | H                                  | -4.696879 | -1.607062 | -2.445499 |
| C | 1.935866  | 2.668434  | -2.164491 | H                                  | -1.080637 | -2.108078 | -1.676386 |
| C | 1.940082  | 2.339114  | -0.812163 | H                                  | -1.915680 | -4.141874 | -2.728455 |
| C | 2.295664  | 0.954949  | -0.297335 | H                                  | -2.790435 | -3.900541 | -1.212414 |
| C | 3.151149  | 0.110662  | -1.262806 | H                                  | -3.564876 | -3.527682 | -2.752218 |
| C | 3.684112  | -1.176174 | -0.671976 | H                                  | -1.184044 | -2.150962 | -4.135329 |
| C | 3.252775  | -2.414819 | -1.149450 | H                                  | -1.421980 | -0.498556 | -3.551240 |
| C | 3.757866  | -3.600694 | -0.620664 | H                                  | -2.800824 | -1.442233 | -4.110013 |
| C | 4.704003  | -3.562857 | 0.397629  | H                                  | -1.043777 | -0.329742 | 2.220136  |
| C | 5.145882  | -2.332733 | 0.880098  | H                                  | -2.820948 | -2.616737 | 1.026811  |
| C | 4.642013  | -1.151450 | 0.347412  | H                                  | -2.778594 | -2.000859 | 2.679758  |
| N | 1.064247  | 0.235304  | 0.135457  | H                                  | -2.458128 | -3.704438 | 2.362405  |
| C | -0.085190 | 0.227045  | -0.485066 | H                                  | 0.922053  | -2.480506 | 3.239644  |
| N | -1.048946 | -0.444508 | 0.122321  | H                                  | -0.579513 | -1.901162 | 3.977653  |
| C | -2.440084 | -0.312355 | -0.281190 | H                                  | -0.369700 | -3.613401 | 3.612980  |
| C | -3.242855 | 0.649546  | 0.363143  | H                                  | -0.332756 | -4.435768 | 1.245423  |
| C | -2.707783 | 1.663860  | 1.368787  | H                                  | -0.602535 | -3.355182 | -0.113353 |
| C | -2.836624 | 3.097802  | 0.822178  | H                                  | 0.915199  | -3.290563 | 0.782818  |
| C | -3.385383 | 1.540236  | 2.743710  | H                                  | 1.266735  | 0.094087  | 2.223368  |
| C | -4.590746 | 0.710866  | 0.006415  | H                                  | 1.620058  | -1.397124 | 1.336218  |
| C | -5.113402 | -0.112287 | -0.978716 | H                                  | 2.200823  | 4.721754  | 2.378058  |
| C | -4.286242 | -0.998902 | -1.650039 | H                                  | 1.538041  | 3.420587  | 3.394997  |
| C | -2.934062 | -1.119341 | -1.324687 | H                                  | 0.443881  | 4.398270  | 2.389090  |
| C | -2.061477 | -2.058052 | -2.147783 | B3LYP energy = -1507.78735901 a.u. |           |           |           |
| C | -2.619601 | -3.488975 | -2.208210 | (5S,1'S)-8a, Conf. E               |           |           |           |
| C | -1.854462 | -1.500983 | -3.568864 | C                                  | 2.042488  | 3.183258  | 0.149408  |
| C | -0.542643 | -0.935311 | 1.464956  | C                                  | 1.922755  | 4.506212  | -0.271173 |
| C | -0.794730 | -2.418496 | 1.856274  | C                                  | 1.993317  | 4.810075  | -1.628608 |
| C | -2.303304 | -2.693325 | 1.981376  | C                                  | 2.184561  | 3.806554  | -2.566977 |
| C | -0.162338 | -2.604696 | 3.252976  | C                                  | 2.311438  | 2.486437  | -2.140118 |
| C | -0.163319 | -3.421095 | 0.880555  | C                                  | 2.242621  | 2.151293  | -0.790834 |
| C | 0.959718  | -0.534246 | 1.389373  | C                                  | 2.393627  | 0.728086  | -0.279598 |
| C | 1.436020  | 3.945686  | 2.449016  | C                                  | 3.074847  | -0.240991 | -1.265848 |
| O | 1.615185  | 2.953846  | 1.433460  | C                                  | 3.416630  | -1.591959 | -0.677784 |
| H | 1.064546  | 5.405669  | 0.412465  | C                                  | 4.414030  | -1.712817 | 0.295888  |
| H | 1.066326  | 5.935606  | -1.981763 | C                                  | 4.744510  | -2.954215 | 0.827322  |
| H | 1.624852  | 4.186715  | -3.654059 | C                                  | 4.084873  | -4.100679 | 0.389648  |
| H | 2.195043  | 1.919089  | -2.900469 | C                                  | 3.096494  | -3.994621 | -0.582560 |
| H | 2.854176  | 1.085697  | 0.628874  | C                                  | 2.766034  | -2.748358 | -1.110405 |
| H | 2.581705  | -0.115307 | -2.165790 | N                                  | 1.080873  | 0.202303  | 0.188499  |
| H | 3.989298  | 0.741488  | -1.568846 | C                                  | -0.046281 | 0.245452  | -0.469891 |
| H | 2.524764  | -2.454716 | -1.951856 | N                                  | -1.084378 | -0.284570 | 0.154156  |
| H | 3.415203  | -4.551911 | -1.009192 | C                                  | -2.440005 | -0.116564 | -0.343418 |
| H | 5.101321  | -4.483032 | 0.807502  | C                                  | -3.230053 | 0.930876  | 0.170086  |
| H | 5.892136  | -2.294088 | 1.664194  | C                                  | -2.707653 | 1.994833  | 1.129904  |
| H | 5.008453  | -0.201196 | 0.720250  | C                                  | -2.657459 | 3.370159  | 0.437930  |
| H | -0.248608 | 0.754112  | -1.414571 | C                                  | -3.524602 | 2.070620  | 2.430158  |
| H | -1.642144 | 1.488197  | 1.510085  | C                                  | -4.544827 | 1.034088  | -0.286256 |
| H | -2.392538 | 3.806391  | 1.524718  | C                                  | -5.045461 | 0.167111  | -1.244798 |
| H | -2.326644 | 3.205737  | -0.137040 | C                                  | -4.226314 | -0.810060 | -1.787336 |
| H | -3.881480 | 3.379996  | 0.681370  | C                                  | -2.908582 | -0.975838 | -1.357287 |
| H | -3.279268 | 0.536681  | 3.159711  | C                                  | -2.044317 | -2.027872 | -2.042128 |
| H | -4.452571 | 1.760815  | 2.681321  |                                    |           |           |           |
| H | -2.941798 | 2.247872  | 3.447084  |                                    |           |           |           |

|   |           |           |           |
|---|-----------|-----------|-----------|
| C | -2.691117 | -3.422546 | -2.029995 |
| C | -1.707812 | -1.605454 | -3.484826 |
| C | -0.663845 | -0.701037 | 1.551742  |
| C | -1.061248 | -2.113619 | 2.066018  |
| C | -0.486772 | -2.220237 | 3.495828  |
| C | -0.496736 | -3.255840 | 1.211535  |
| C | -2.590956 | -2.243799 | 2.164281  |
| C | 0.870804  | -0.446937 | 1.495549  |
| C | 1.892689  | 3.793816  | 2.472887  |
| O | 1.972210  | 2.792258  | 1.454390  |
| H | 1.776602  | 5.301456  | 0.445092  |
| H | 1.898474  | 5.841412  | -1.944544 |
| H | 2.243068  | 4.042625  | -3.621260 |
| H | 2.475754  | 1.712640  | -2.877963 |
| H | 2.993650  | 0.768829  | 0.628738  |
| H | 2.445265  | -0.378973 | -2.147120 |
| H | 3.990646  | 0.247845  | -1.605727 |
| H | 4.947705  | -0.831071 | 0.633506  |
| H | 5.524460  | -3.028858 | 1.575197  |
| H | 4.346038  | -5.068750 | 0.798586  |
| H | 2.584123  | -4.881314 | -0.935186 |
| H | 2.001539  | -2.677684 | -1.875910 |
| H | -0.135885 | 0.704101  | -1.444065 |
| H | -1.681617 | 1.751251  | 1.402284  |
| H | -2.227018 | 4.113766  | 1.112147  |
| H | -2.048875 | 3.339665  | -0.467918 |
| H | -3.656229 | 3.710878  | 0.159184  |
| H | -4.548820 | 2.395497  | 2.238340  |
| H | -3.073813 | 2.791756  | 3.115117  |
| H | -3.572668 | 1.105012  | 2.936393  |
| H | -5.180198 | 1.820769  | 0.099464  |
| H | -6.068435 | 0.267687  | -1.585607 |
| H | -4.615791 | -1.455546 | -2.563607 |
| H | -1.101938 | -2.100826 | -1.500218 |
| H | -1.997937 | -4.159289 | -2.441148 |
| H | -2.958815 | -3.736108 | -1.019938 |
| H | -3.596663 | -3.449605 | -2.638611 |
| H | -1.040296 | -2.336140 | -3.946669 |
| H | -1.220166 | -0.629094 | -3.520106 |
| H | -2.610255 | -1.543926 | -4.096311 |
| H | -1.124636 | 0.013718  | 2.233726  |
| H | 0.604304  | -2.189675 | 3.510747  |
| H | -0.791506 | -3.169606 | 3.938529  |
| H | -0.861369 | -1.418772 | 4.137220  |
| H | -0.903111 | -3.248473 | 0.201941  |
| H | 0.591155  | -3.230121 | 1.136971  |
| H | -0.765324 | -4.211880 | 1.664551  |
| H | -3.076862 | -2.207759 | 1.190740  |
| H | -2.845131 | -3.199334 | 2.626768  |
| H | -3.017651 | -1.453285 | 2.785568  |
| H | 1.212036  | 0.219319  | 2.285049  |
| H | 1.446517  | -1.369321 | 1.535759  |
| H | 2.753925  | 4.464038  | 2.432656  |
| H | 1.895857  | 3.255510  | 3.416945  |
| H | 0.970678  | 4.372884  | 2.386926  |

B3LYP energy = -1507.78730329 a.u.

(5S,1'S)-8a, Conf. F

|   |           |           |           |
|---|-----------|-----------|-----------|
| C | -3.105169 | 1.880259  | 0.783539  |
| C | -3.868410 | 3.046860  | 0.803547  |
| C | -4.815208 | 3.279230  | -0.190770 |
| C | -5.008857 | 2.355666  | -1.207719 |
| C | -4.245404 | 1.192211  | -1.219525 |
| C | -3.292795 | 0.928592  | -0.237217 |
| C | -2.532521 | -0.387222 | -0.290287 |
| C | -2.765633 | -1.313557 | 0.923696  |
| C | -2.273534 | -2.730527 | 0.723401  |
| C | -1.232921 | -3.245974 | 1.497848  |
| C | -0.789842 | -4.555045 | 1.322325  |
| C | -1.384560 | -5.370241 | 0.365818  |
| C | -2.429754 | -4.871200 | -0.408309 |
| C | -2.869692 | -3.564599 | -0.228652 |
| N | -1.095383 | -0.183758 | -0.597781 |
| C | -0.103657 | 0.035761  | 0.224788  |
| N | 1.073259  | 0.209921  | -0.354960 |
| C | 2.220829  | 0.743670  | 0.360865  |
| C | 2.489666  | 2.124190  | 0.263570  |
| C | 1.568468  | 3.124142  | -0.429427 |
| C | 1.028244  | 4.158284  | 0.574992  |
| C | 2.253657  | 3.826655  | -1.613483 |
| C | 3.639714  | 2.607173  | 0.889110  |
| C | 4.467256  | 1.770149  | 1.620674  |
| C | 4.141996  | 0.430719  | 1.762927  |
| C | 3.015936  | -0.116302 | 1.144668  |
| C | 2.689683  | -1.584048 | 1.394257  |
| C | 3.846719  | -2.520874 | 1.009185  |
| C | 2.284675  | -1.814379 | 2.862620  |
| C | 0.908948  | 0.159996  | -1.859807 |
| C | 1.812735  | -0.819320 | -2.662609 |
| C | 1.408049  | -0.660684 | -4.144908 |
| C | 1.633237  | -2.285543 | -2.244388 |
| C | 3.291951  | -0.414013 | -2.537428 |
| C | -0.613941 | -0.123943 | -1.989295 |
| C | -2.041720 | 2.427530  | 2.876747  |
| O | -2.149702 | 1.592347  | 1.718595  |
| H | -3.732955 | 3.778285  | 1.586644  |
| H | -5.400310 | 4.189803  | -0.159874 |
| H | -5.744444 | 2.532225  | -1.981308 |
| H | -4.400889 | 0.462437  | -2.006040 |
| H | -2.903634 | -0.918054 | -1.166758 |
| H | -2.329782 | -0.879792 | 1.822210  |
| H | -3.846495 | -1.320409 | 1.083425  |
| H | -0.772880 | -2.625391 | 2.258301  |
| H | 0.015517  | -4.937630 | 1.937328  |
| H | -1.044687 | -6.389353 | 0.229766  |
| H | -2.908989 | -5.503864 | -1.145392 |
| H | -3.698753 | -3.197778 | -0.823984 |
| H | -0.236712 | 0.097577  | 1.292318  |
| H | 0.699158  | 2.593193  | -0.816290 |
| H | 1.828383  | 4.781099  | 0.978472  |
| H | 0.308782  | 4.816487  | 0.083465  |

|                                    |           |           |           |   |           |           |           |
|------------------------------------|-----------|-----------|-----------|---|-----------|-----------|-----------|
| H                                  | 0.527960  | 3.671606  | 1.413724  | C | -5.194831 | 1.143132  | -1.454024 |
| H                                  | 2.618622  | 3.113282  | -2.354611 | C | -4.676031 | 1.692139  | -0.292040 |
| H                                  | 3.106650  | 4.420368  | -1.279370 | C | -3.478225 | 1.230963  | 0.255778  |
| H                                  | 1.552527  | 4.501632  | -2.108464 | C | -2.903286 | 1.959351  | 1.466420  |
| H                                  | 3.879007  | 3.660362  | 0.818118  | C | -2.583601 | 3.425827  | 1.122561  |
| H                                  | 5.354399  | 2.166359  | 2.098959  | C | -3.826545 | 1.876035  | 2.693223  |
| H                                  | 4.775357  | -0.204843 | 2.367949  | C | -1.506098 | -1.091715 | 1.536837  |
| H                                  | 1.833260  | -1.853469 | 0.777704  | C | -2.112285 | -2.519697 | 1.651906  |
| H                                  | 3.538516  | -3.561614 | 1.128124  | C | -3.634521 | -2.476003 | 1.431519  |
| H                                  | 4.157423  | -2.378204 | -0.026457 | C | -1.860892 | -2.981882 | 3.104054  |
| H                                  | 4.719676  | -2.362122 | 1.644822  | C | -1.474156 | -3.525887 | 0.682955  |
| H                                  | 1.992640  | -2.855772 | 3.013252  | C | 0.029641  | -1.020992 | 1.782797  |
| H                                  | 1.446130  | -1.181065 | 3.159519  | C | 1.999494  | 3.594363  | 2.145971  |
| H                                  | 3.115163  | -1.600381 | 3.538317  | O | 1.939896  | 2.353768  | 1.435881  |
| H                                  | 1.129315  | 1.158993  | -2.231973 | H | 2.417958  | 4.468995  | -0.188915 |
| H                                  | 0.386054  | -0.991722 | -4.338448 | H | 2.860244  | 4.291104  | -2.593943 |
| H                                  | 2.068354  | -1.266619 | -4.767095 | H | 2.919206  | 2.067343  | -3.698377 |
| H                                  | 1.500350  | 0.376863  | -4.475138 | H | 2.546060  | 0.038003  | -2.366908 |
| H                                  | 1.935895  | -2.456378 | -1.212895 | H | 2.400106  | 0.074580  | 1.346483  |
| H                                  | 0.603841  | -2.630565 | -2.356332 | H | 2.298875  | -2.274011 | 0.496227  |
| H                                  | 2.254212  | -2.921875 | -2.877333 | H | 2.360972  | -1.692814 | -1.148614 |
| H                                  | 3.669484  | -0.517038 | -1.522091 | H | 4.506845  | -1.680450 | -2.155413 |
| H                                  | 3.898953  | -1.050394 | -3.184072 | H | 6.963418  | -1.680621 | -1.998787 |
| H                                  | 3.448264  | 0.620457  | -2.852075 | H | 8.072529  | -1.451650 | 0.207444  |
| H                                  | -1.140676 | 0.663538  | -2.527067 | H | 6.691454  | -1.238011 | 2.256546  |
| H                                  | -0.821408 | -1.075513 | -2.475235 | H | 4.239356  | -1.249083 | 2.104072  |
| H                                  | -1.741816 | 3.442293  | 2.608557  | H | -0.268481 | 0.518181  | -1.133761 |
| H                                  | -1.271435 | 1.975766  | 3.496473  | H | -1.741368 | -1.808555 | -1.802734 |
| H                                  | -2.984413 | 2.453610  | 3.426759  | H | -2.859318 | -3.418695 | -3.252006 |
| B3LYP energy = -1507.78725047 a.u. |           |           |           | H | -3.889133 | -3.107226 | -1.851190 |
| (5S,1'S)-8a, Conf. G               |           |           |           | H | -4.273750 | -2.382828 | -3.412906 |
|                                    |           |           |           | H | -1.328445 | 0.016819  | -3.468491 |
|                                    |           |           |           | H | -2.763452 | -0.486868 | -4.357862 |
| C                                  | 2.213777  | 2.342627  | 0.100943  | H | -1.387058 | -1.583532 | -4.220145 |
| C                                  | 2.436957  | 3.493960  | -0.653405 | H | -4.902246 | -0.260921 | -3.034947 |
| C                                  | 2.688271  | 3.389938  | -2.018727 | H | -6.124387 | 1.518557  | -1.863521 |
| C                                  | 2.719565  | 2.148670  | -2.638138 | H | -5.199175 | 2.510009  | 0.186570  |
| C                                  | 2.505321  | 1.001758  | -1.878274 | H | -1.953819 | 1.497742  | 1.734436  |
| C                                  | 2.252087  | 1.071831  | -0.511196 | H | -2.103386 | 3.912431  | 1.974279  |
| C                                  | 2.018667  | -0.152958 | 0.351125  | H | -1.911066 | 3.495800  | 0.265410  |
| C                                  | 2.679007  | -1.463166 | -0.130544 | H | -3.488552 | 3.987863  | 0.885289  |
| C                                  | 4.190429  | -1.446907 | -0.042025 | H | -3.361271 | 2.369014  | 3.549339  |
| C                                  | 4.979591  | -1.575481 | -1.185859 | H | -4.040926 | 0.842369  | 2.971500  |
| C                                  | 6.369182  | -1.578053 | -1.099072 | H | -4.780569 | 2.371598  | 2.504016  |
| C                                  | 6.991866  | -1.451040 | 0.137924  | H | -2.022924 | -0.474471 | 2.269075  |
| C                                  | 6.215803  | -1.328341 | 1.287592  | H | -4.115217 | -1.771472 | 2.113815  |
| C                                  | 4.828297  | -1.330275 | 1.196972  | H | -4.058456 | -3.463264 | 1.623831  |
| N                                  | 0.562939  | -0.372353 | 0.571010  | H | -3.900620 | -2.193608 | 0.414816  |
| C                                  | -0.421259 | -0.031958 | -0.217046 | H | -0.799052 | -3.086446 | 3.335360  |
| N                                  | -1.623789 | -0.384656 | 0.204085  | H | -2.299866 | -2.287185 | 3.824261  |
| C                                  | -2.836946 | 0.153958  | -0.386839 | H | -2.323228 | -3.957769 | 3.259693  |
| C                                  | -3.315108 | -0.384322 | -1.598096 | H | -0.399545 | -3.636409 | 0.840567  |
| C                                  | -2.573879 | -1.444534 | -2.403319 | H | -1.920398 | -4.509975 | 0.835831  |
| C                                  | -3.455133 | -2.656897 | -2.745077 | H | -1.638494 | -3.252780 | -0.358659 |
| C                                  | -1.976423 | -0.835171 | -3.685939 | H | 0.289136  | -0.418309 | 2.653030  |
| C                                  | -4.507140 | 0.132888  | -2.107715 | H | 0.474677  | -2.005834 | 1.901942  |

|   |          |          |          |
|---|----------|----------|----------|
| H | 2.988259 | 4.049235 | 2.058910 |
| H | 1.803879 | 3.347889 | 3.186173 |
| H | 1.238453 | 4.291215 | 1.788104 |

B3LYP energy = -1507.78700822 a.u.

(5*S*,1'*S*)-**8a**, Conf. H

|   |           |           |           |
|---|-----------|-----------|-----------|
| C | 3.576772  | 1.572430  | 0.586111  |
| C | 4.238693  | 2.735906  | 0.186177  |
| C | 3.868250  | 3.378732  | -0.990005 |
| C | 2.839249  | 2.876030  | -1.777091 |
| C | 2.187161  | 1.714976  | -1.376662 |
| C | 2.539521  | 1.047606  | -0.206783 |
| C | 1.830811  | -0.233837 | 0.205813  |
| C | 2.056133  | -1.407201 | -0.770359 |
| C | 3.499457  | -1.861302 | -0.805486 |
| C | 4.347454  | -1.481644 | -1.846909 |
| C | 5.673557  | -1.904411 | -1.874074 |
| C | 6.169201  | -2.715403 | -0.858293 |
| C | 5.330710  | -3.103309 | 0.183601  |
| C | 4.006541  | -2.679415 | 0.207416  |
| N | 0.386730  | 0.032669  | 0.407698  |
| C | -0.636625 | -0.446333 | -0.248299 |
| N | -1.820031 | -0.045099 | 0.186973  |
| C | -3.034488 | -0.241528 | -0.588177 |
| C | -3.686009 | -1.490266 | -0.552414 |
| C | -3.139247 | -2.711654 | 0.177122  |
| C | -4.150500 | -3.311529 | 1.167710  |
| C | -2.672483 | -3.782895 | -0.826403 |
| C | -4.875511 | -1.619344 | -1.271870 |
| C | -5.397788 | -0.562551 | -2.000330 |
| C | -4.711171 | 0.640005  | -2.061517 |
| C | -3.506658 | 0.823379  | -1.381550 |
| C | -2.747412 | 2.130789  | -1.583320 |
| C | -2.365728 | 2.325105  | -3.062212 |
| C | -3.527006 | 3.348527  | -1.059200 |
| C | -1.633763 | 0.916220  | 1.341318  |
| C | -2.379507 | 0.608974  | 2.671432  |
| C | -1.981964 | -0.740847 | 3.286226  |
| C | -3.902566 | 0.658781  | 2.460755  |
| C | -2.002205 | 1.744283  | 3.647859  |
| C | -0.083858 | 0.944032  | 1.468455  |
| C | 4.952406  | 1.343154  | 2.547927  |
| O | 3.871261  | 0.892828  | 1.728903  |
| H | 5.040428  | 3.144045  | 0.783997  |
| H | 4.391456  | 4.279118  | -1.287013 |
| H | 2.550124  | 3.376474  | -2.691880 |
| H | 1.386917  | 1.320256  | -1.992729 |
| H | 2.207865  | -0.529263 | 1.183994  |
| H | 1.430490  | -2.246788 | -0.455067 |
| H | 1.743774  | -1.120187 | -1.777072 |
| H | 3.969445  | -0.853461 | -2.644710 |
| H | 6.317138  | -1.602705 | -2.691327 |
| H | 7.199647  | -3.047829 | -0.880252 |
| H | 5.705945  | -3.741676 | 0.974115  |
| H | 3.359464  | -2.995914 | 1.018201  |

|   |           |           |           |
|---|-----------|-----------|-----------|
| H | -0.537141 | -1.108502 | -1.094279 |
| H | -2.265315 | -2.404522 | 0.750284  |
| H | -3.687241 | -4.129598 | 1.723118  |
| H | -4.501668 | -2.570753 | 1.887259  |
| H | -5.022819 | -3.717033 | 0.652522  |
| H | -1.929848 | -3.391527 | -1.524811 |
| H | -3.510405 | -4.160395 | -1.415619 |
| H | -2.228691 | -4.628169 | -0.296191 |
| H | -5.399489 | -2.566089 | -1.261800 |
| H | -6.329301 | -0.683089 | -2.539247 |
| H | -5.105923 | 1.445708  | -2.666949 |
| H | -1.809653 | 2.077114  | -1.031210 |
| H | -1.750402 | 3.220251  | -3.174465 |
| H | -1.800414 | 1.472780  | -3.444388 |
| H | -3.249215 | 2.448732  | -3.691139 |
| H | -2.932714 | 4.256635  | -1.179282 |
| H | -3.780154 | 3.246267  | -0.002263 |
| H | -4.459468 | 3.486727  | -1.609799 |
| H | -1.990775 | 1.887404  | 1.002841  |
| H | -2.248501 | -1.576777 | 2.641502  |
| H | -2.506525 | -0.878268 | 4.233311  |
| H | -0.913366 | -0.805155 | 3.500927  |
| H | -4.212621 | 1.609445  | 2.021204  |
| H | -4.262099 | -0.141933 | 1.817409  |
| H | -4.405981 | 0.561611  | 3.424346  |
| H | -2.259808 | 2.724089  | 3.238642  |
| H | -2.553624 | 1.618499  | 4.580761  |
| H | -0.939460 | 1.747827  | 3.896789  |
| H | 0.332917  | 1.936431  | 1.305355  |
| H | 0.265101  | 0.574894  | 2.431341  |
| H | 5.895519  | 1.328029  | 1.997588  |
| H | 5.005602  | 0.641189  | 3.375813  |
| H | 4.765242  | 2.347751  | 2.934437  |

B3LYP energy = -1507.78668441 a.u.

(5*S*,1'*S*)-**8a**, Conf. I

|   |           |           |           |
|---|-----------|-----------|-----------|
| C | -4.396728 | -1.228014 | -0.026595 |
| C | -5.117190 | -2.382682 | -0.333345 |
| C | -4.512686 | -3.407021 | -1.056413 |
| C | -3.195146 | -3.290797 | -1.477693 |
| C | -2.480931 | -2.137277 | -1.165190 |
| C | -3.056776 | -1.100717 | -0.440101 |
| C | -2.307418 | 0.187257  | -0.126797 |
| C | -2.416167 | 1.202530  | -1.281429 |
| C | -1.958427 | 2.611955  | -0.966213 |
| C | -2.478783 | 3.305582  | 0.131910  |
| C | -2.093653 | 4.615019  | 0.395223  |
| C | -1.184709 | 5.259988  | -0.440604 |
| C | -0.670014 | 4.585924  | -1.541858 |
| C | -1.054862 | 3.272125  | -1.800028 |
| N | -0.918138 | -0.097168 | 0.285356  |
| C | 0.195342  | 0.030510  | -0.388198 |
| N | 1.287942  | -0.340595 | 0.260781  |
| C | 2.558603  | -0.566203 | -0.412397 |
| C | 3.396411  | 0.527640  | -0.707506 |



|   |           |           |           |
|---|-----------|-----------|-----------|
| C | 3.012214  | 1.983231  | -0.472800 |
| C | 4.029107  | 2.729951  | 0.406637  |
| C | 2.824832  | 2.717794  | -1.813355 |
| C | 4.631065  | 0.255307  | -1.299687 |
| C | 5.021662  | -1.040207 | -1.596633 |
| C | 4.158502  | -2.094761 | -1.344864 |
| C | 2.904300  | -1.885832 | -0.770396 |
| C | 1.971866  | -3.084458 | -0.618311 |
| C | 1.628422  | -3.695703 | -1.989369 |
| C | 2.546871  | -4.155581 | 0.323893  |
| C | 0.910385  | -0.845634 | 1.638224  |
| C | 1.604197  | -0.189437 | 2.866071  |
| C | 1.342057  | 1.319784  | 2.966467  |
| C | 3.118148  | -0.460004 | 2.836711  |
| C | 1.026614  | -0.891395 | 4.114525  |
| C | -0.634376 | -0.679512 | 1.610744  |
| C | -6.265648 | -0.234782 | 1.120744  |
| O | -4.912867 | -0.170500 | 0.661711  |
| H | -6.144597 | -2.489399 | -0.017417 |
| H | -5.083307 | -4.297402 | -1.288852 |
| H | -2.725698 | -4.084932 | -2.043054 |
| H | -1.453261 | -2.051445 | -1.495450 |
| H | -2.771922 | 0.630686  | 0.752530  |
| H | -1.905115 | 0.820863  | -2.168534 |
| H | -3.476504 | 1.220624  | -1.543981 |
| H | -3.206823 | 2.829063  | 0.778123  |
| H | -2.511485 | 5.136982  | 1.247367  |
| H | -0.888535 | 6.281717  | -0.238448 |
| H | 0.028794  | 5.080841  | -2.204749 |
| H | -0.658743 | 2.763909  | -2.672165 |
| H | 0.233477  | 0.394373  | -1.403557 |
| H | 2.053171  | 2.008026  | 0.043173  |
| H | 3.677389  | 3.745095  | 0.601419  |
| H | 4.178527  | 2.235306  | 1.367035  |
| H | 5.001060  | 2.806507  | -0.083892 |
| H | 2.090942  | 2.218185  | -2.448693 |
| H | 3.763373  | 2.771235  | -2.368860 |
| H | 2.480067  | 3.738159  | -1.636797 |
| H | 5.296660  | 1.075760  | -1.533390 |
| H | 5.990288  | -1.226242 | -2.043631 |
| H | 4.455571  | -3.099125 | -1.617680 |
| H | 1.029290  | -2.745033 | -0.191238 |
| H | 0.910548  | -4.509232 | -1.865900 |
| H | 1.190335  | -2.954573 | -2.660498 |
| H | 2.514124  | -4.105253 | -2.477748 |
| H | 1.827872  | -4.966820 | 0.454898  |
| H | 2.781558  | -3.747693 | 1.308780  |
| H | 3.463732  | -4.587880 | -0.081096 |
| H | 1.166273  | -1.902826 | 1.666476  |
| H | 1.748740  | 1.863482  | 2.115288  |
| H | 1.820550  | 1.713196  | 3.865022  |
| H | 0.278797  | 1.555467  | 3.041348  |
| H | 3.329947  | -1.529914 | 2.780862  |
| H | 3.613120  | 0.023438  | 1.997154  |
| H | 3.572952  | -0.081030 | 3.753705  |
| H | 1.181011  | -1.972424 | 4.073567  |

|   |           |           |          |
|---|-----------|-----------|----------|
| H | 1.532572  | -0.518194 | 5.006025 |
| H | -0.040618 | -0.703803 | 4.245389 |
| H | -1.160703 | -1.628284 | 1.707756 |
| H | -0.997470 | 0.000644  | 2.378993 |
| H | -6.961003 | -0.325804 | 0.283438 |
| H | -6.444732 | 0.702769  | 1.640108 |
| H | -6.408416 | -1.068150 | 1.812308 |

B3LYP energy = -1507.78648897 a.u.

(5S,1'S)-**8a**, Conf. J

|   |           |           |           |
|---|-----------|-----------|-----------|
| C | -3.927133 | -1.129378 | -0.146642 |
| C | -4.780307 | -2.212040 | 0.071540  |
| C | -4.841116 | -2.817749 | 1.322833  |
| C | -4.057261 | -2.350096 | 2.367582  |
| C | -3.213353 | -1.267001 | 2.145086  |
| C | -3.126691 | -0.636991 | 0.903620  |
| C | -2.196577 | 0.565608  | 0.784403  |
| C | -2.851888 | 1.851244  | 0.236534  |
| C | -2.012799 | 3.096980  | 0.421291  |
| C | -1.532395 | 3.805783  | -0.681596 |
| C | -0.775664 | 4.963637  | -0.515697 |
| C | -0.487364 | 5.431292  | 0.761717  |
| C | -0.965805 | 4.737856  | 1.871020  |
| C | -1.722179 | 3.583655  | 1.700396  |
| N | -0.932883 | 0.245180  | 0.071255  |
| C | 0.199036  | -0.020976 | 0.670342  |
| N | 1.188868  | -0.386613 | -0.123518 |
| C | 2.562465  | -0.478198 | 0.342966  |
| C | 2.964561  | -1.606182 | 1.086857  |
| C | 2.016793  | -2.719214 | 1.518196  |
| C | 2.518149  | -4.114431 | 1.110460  |
| C | 1.756210  | -2.664063 | 3.035206  |
| C | 4.300978  | -1.674437 | 1.484050  |
| C | 5.202805  | -0.672540 | 1.162504  |
| C | 4.772374  | 0.447717  | 0.469456  |
| C | 3.443703  | 0.585423  | 0.065300  |
| C | 3.015889  | 1.892465  | -0.594127 |
| C | 3.248726  | 3.088133  | 0.347396  |
| C | 3.716525  | 2.120694  | -1.944049 |
| C | 0.712441  | -0.369479 | -1.559621 |
| C | 0.876197  | -1.671881 | -2.396286 |
| C | 0.330986  | -1.347703 | -3.804505 |
| C | 0.099478  | -2.862828 | -1.816786 |
| C | 2.362675  | -2.038748 | -2.543087 |
| C | -0.762753 | 0.098757  | -1.389484 |
| C | -4.671829 | -0.900960 | -2.428729 |
| O | -3.812271 | -0.505401 | -1.355536 |
| H | -5.399493 | -2.589189 | -0.728893 |
| H | -5.509428 | -3.656506 | 1.472271  |
| H | -4.103473 | -2.813126 | 3.344396  |
| H | -2.611022 | -0.890210 | 2.964232  |
| H | -1.870730 | 0.785932  | 1.800525  |
| H | -3.115085 | 1.720927  | -0.810418 |
| H | -3.795246 | 1.958962  | 0.777580  |
| H | -1.767641 | 3.462574  | -1.682882 |

|                                    |           |           |           |   |           |           |           |
|------------------------------------|-----------|-----------|-----------|---|-----------|-----------|-----------|
| H                                  | -0.419496 | 5.502906  | -1.385005 | C | 0.183138  | 0.070890  | -0.691971 |
| H                                  | 0.096786  | 6.333478  | 0.893644  | N | 1.202541  | 0.308920  | 0.112412  |
| H                                  | -0.758696 | 5.102803  | 2.869613  | C | 2.565845  | 0.408965  | -0.382987 |
| H                                  | -2.105633 | 3.068095  | 2.574411  | C | 3.387982  | -0.733786 | -0.336813 |
| H                                  | 0.323636  | 0.060913  | 1.740805  | C | 2.891173  | -2.117400 | 0.067264  |
| H                                  | 1.059651  | -2.563137 | 1.022855  | C | 2.959275  | -3.089589 | -1.125037 |
| H                                  | 1.766771  | -4.866650 | 1.359072  | C | 3.648548  | -2.685142 | 1.278737  |
| H                                  | 2.717108  | -4.176568 | 0.039590  | C | 4.712174  | -0.596660 | -0.755142 |
| H                                  | 3.435959  | -4.381541 | 1.637157  | C | 5.191921  | 0.608385  | -1.243679 |
| H                                  | 2.674525  | -2.838491 | 3.599385  | C | 4.342452  | 1.698458  | -1.348810 |
| H                                  | 1.035270  | -3.432643 | 3.321711  | C | 3.013316  | 1.629251  | -0.927353 |
| H                                  | 1.358506  | -1.695264 | 3.344844  | C | 2.118108  | 2.845487  | -1.133165 |
| H                                  | 4.640834  | -2.528276 | 2.055253  | C | 2.704155  | 4.123683  | -0.511109 |
| H                                  | 6.237809  | -0.755556 | 1.470133  | C | 1.828642  | 3.063895  | -2.630383 |
| H                                  | 5.476182  | 1.242088  | 0.256847  | C | 0.769304  | 0.076981  | 1.545204  |
| H                                  | 1.942773  | 1.855715  | -0.778577 | C | 1.078309  | 1.179407  | 2.597186  |
| H                                  | 2.868454  | 4.002945  | -0.111289 | C | 2.596852  | 1.370566  | 2.754296  |
| H                                  | 2.736545  | 2.950065  | 1.301336  | C | 0.528759  | 0.651066  | 3.940463  |
| H                                  | 4.310363  | 3.234777  | 0.553825  | C | 0.415141  | 2.526496  | 2.275774  |
| H                                  | 3.351792  | 3.040073  | -2.406639 | C | -0.747398 | -0.223811 | 1.364710  |
| H                                  | 3.540294  | 1.297897  | -2.639333 | C | -4.430125 | 1.417888  | 2.387953  |
| H                                  | 4.796168  | 2.218944  | -1.816129 | O | -3.637257 | 0.904514  | 1.312920  |
| H                                  | 1.284163  | 0.401904  | -2.071935 | H | -5.010324 | 3.125840  | 0.648331  |
| H                                  | -0.736610 | -1.120117 | -3.798639 | H | -5.088211 | 4.107977  | -1.592500 |
| H                                  | 0.475779  | -2.209791 | -4.457352 | H | -3.853139 | 3.041096  | -3.471471 |
| H                                  | 0.858226  | -0.500895 | -4.250765 | H | -2.559324 | 0.985629  | -3.055270 |
| H                                  | 0.468156  | -3.153441 | -0.834437 | H | -1.915266 | -0.684315 | -1.836825 |
| H                                  | -0.970203 | -2.663682 | -1.730359 | H | -3.321169 | -1.426506 | 0.753897  |
| H                                  | 0.213387  | -3.725352 | -2.475778 | H | -3.954426 | -1.643101 | -0.856936 |
| H                                  | 2.822508  | -2.305670 | -1.593542 | H | -2.159292 | -2.916161 | -2.535086 |
| H                                  | 2.461059  | -2.895322 | -3.212465 | H | -1.033673 | -5.094001 | -2.693739 |
| H                                  | 2.935098  | -1.214926 | -2.974962 | H | -0.560187 | -6.410375 | -0.646428 |
| H                                  | -0.946408 | 1.055315  | -1.874487 | H | -1.237431 | -5.519388 | 1.567029  |
| H                                  | -1.481771 | -0.620432 | -1.765973 | H | -2.361911 | -3.332692 | 1.729094  |
| H                                  | -4.488844 | -1.937108 | -2.722000 | H | 0.278903  | 0.114150  | -1.767775 |
| H                                  | -4.428956 | -0.241598 | -3.257898 | H | 1.839503  | -2.046106 | 0.340860  |
| H                                  | -5.722056 | -0.773660 | -2.158483 | H | 2.533062  | -4.054992 | -0.844855 |
| B3LYP energy = -1507.78607673 a.u. |           |           |           | H | 2.399810  | -2.707566 | -1.981168 |
| (5S,1'S)-8a, Conf. K               |           |           |           | H | 3.989237  | -3.257377 | -1.444993 |
| C                                  | -3.727639 | 1.490507  | 0.082918  | H | 3.588339  | -2.020831 | 2.142768  |
| C                                  | -4.466047 | 2.650397  | -0.154340 | H | 4.705348  | -2.836864 | 1.051117  |
| C                                  | -4.508666 | 3.208095  | -1.428816 | H | 3.229359  | -3.652141 | 1.563861  |
| C                                  | -3.820306 | 2.615673  | -2.477190 | H | 5.371127  | -1.454645 | -0.719884 |
| C                                  | -3.088780 | 1.457258  | -2.234691 | H | 6.222664  | 0.691365  | -1.565311 |
| C                                  | -3.024201 | 0.872566  | -0.970190 | H | 4.717298  | 2.622398  | -1.769408 |
| C                                  | -2.227435 | -0.418902 | -0.827403 | H | 1.162719  | 2.653654  | -0.646453 |
| C                                  | -3.028645 | -1.615237 | -0.276542 | H | 1.991667  | 4.945486  | -0.607475 |
| C                                  | -2.319206 | -2.948150 | -0.385080 | H | 2.928737  | 3.993616  | 0.548517  |
| C                                  | -1.942990 | -3.469398 | -1.627541 | H | 3.624446  | 4.426678  | -1.013137 |
| C                                  | -1.311021 | -4.704553 | -1.721801 | H | 1.134940  | 3.896841  | -2.762485 |
| C                                  | -1.046987 | -5.445916 | -0.572499 | H | 1.387594  | 2.178821  | -3.093194 |
| C                                  | -1.425078 | -4.944693 | 0.668256  | H | 2.744275  | 3.299626  | -3.176483 |
| C                                  | -2.055489 | -3.705702 | 0.757915  | H | 1.283092  | -0.823385 | 1.881276  |
| N                                  | -0.942798 | -0.233641 | -0.100341 | H | 2.792050  | 2.061695  | 3.576369  |
|                                    |           |           |           | H | 3.061283  | 1.780565  | 1.859427  |
|                                    |           |           |           | H | 3.094012  | 0.427343  | 2.990875  |

|   |           |           |          |
|---|-----------|-----------|----------|
| H | -0.556311 | 0.532183  | 3.930171 |
| H | 0.976097  | -0.310833 | 4.202633 |
| H | 0.771406  | 1.357684  | 4.735444 |
| H | 0.780732  | 2.950411  | 1.342417 |
| H | -0.671982 | 2.453947  | 2.210455 |
| H | 0.641414  | 3.240468  | 3.069679 |
| H | -1.024062 | -1.189883 | 1.779813 |
| H | -1.384651 | 0.537667  | 1.802278 |
| H | -4.141783 | 2.440601  | 2.640293 |
| H | -4.233260 | 0.766897  | 3.235759 |
| H | -5.493346 | 1.383612  | 2.141855 |

B3LYP energy = -1507.78590085 a.u.

(5*S*,1'*R*)-**8b**, Conf. A

|   |           |           |           |
|---|-----------|-----------|-----------|
| C | -3.430915 | 1.595669  | 0.834938  |
| C | -4.345975 | 2.630247  | 0.644923  |
| C | -5.239005 | 2.577306  | -0.421914 |
| C | -5.229143 | 1.500606  | -1.297309 |
| C | -4.320440 | 0.465012  | -1.095732 |
| C | -3.415370 | 0.488779  | -0.037899 |
| C | -2.422145 | -0.630344 | 0.225173  |
| C | -2.867776 | -2.017189 | -0.274557 |
| C | -1.986418 | -3.154249 | 0.193227  |
| C | -1.309876 | -3.960276 | -0.723498 |
| C | -0.518032 | -5.023114 | -0.294859 |
| C | -0.390660 | -5.294610 | 1.062923  |
| C | -1.064868 | -4.501073 | 1.988331  |
| C | -1.856792 | -3.443176 | 1.555756  |
| N | -1.087425 | -0.260538 | -0.307215 |
| C | -0.029372 | -0.003504 | 0.415704  |
| N | 1.045525  | 0.352313  | -0.266356 |
| C | 2.221204  | 0.912626  | 0.378582  |
| C | 2.371568  | 2.313200  | 0.410851  |
| C | 1.300155  | 3.290458  | -0.061863 |
| C | 0.804160  | 4.164853  | 1.104471  |
| C | 1.777824  | 4.169047  | -1.229638 |
| C | 3.544987  | 2.826055  | 0.965004  |
| C | 4.507405  | 1.992180  | 1.512598  |
| C | 4.300576  | 0.622111  | 1.538157  |
| C | 3.158743  | 0.047461  | 0.976684  |
| C | 2.968402  | -1.460005 | 1.089673  |
| C | 4.158625  | -2.249503 | 0.520240  |
| C | 2.700163  | -1.869690 | 2.549930  |
| C | 0.699521  | 0.432545  | -1.739432 |
| C | 1.613358  | -0.315791 | -2.751346 |
| C | 1.675457  | -1.829848 | -2.509363 |
| C | 3.035457  | 0.271496  | -2.732778 |
| C | 1.013048  | -0.048833 | -4.148661 |
| C | -0.781882 | -0.047457 | -1.733449 |
| C | -2.571810 | 2.585825  | 2.854673  |
| O | -2.511805 | 1.573567  | 1.844616  |
| H | -4.370549 | 3.475066  | 1.317575  |
| H | -5.944408 | 3.387102  | -0.560501 |
| H | -5.924807 | 1.457970  | -2.124971 |

|   |           |           |           |
|---|-----------|-----------|-----------|
| H | -4.332297 | -0.377580 | -1.774709 |
| H | -2.276730 | -0.691903 | 1.302437  |
| H | -3.884463 | -2.164424 | 0.097341  |
| H | -2.935156 | -2.032841 | -1.363117 |
| H | -1.414261 | -3.768216 | -1.785402 |
| H | -0.006700 | -5.640755 | -1.023000 |
| H | 0.220952  | -6.122804 | 1.398515  |
| H | -0.983085 | -4.713808 | 3.047219  |
| H | -2.393427 | -2.849358 | 2.287597  |
| H | -0.037998 | -0.060109 | 1.494260  |
| H | 0.436249  | 2.721342  | -0.404935 |
| H | -0.019952 | 4.799553  | 0.771731  |
| H | 0.450348  | 3.554528  | 1.937049  |
| H | 1.594913  | 4.816833  | 1.479565  |
| H | 2.605183  | 4.813180  | -0.925757 |
| H | 0.965429  | 4.812656  | -1.573176 |
| H | 2.119023  | 3.571896  | -2.076873 |
| H | 3.697477  | 3.897418  | 0.988345  |
| H | 5.409279  | 2.412481  | 1.940107  |
| H | 5.040759  | -0.015616 | 2.003585  |
| H | 2.087911  | -1.738891 | 0.512555  |
| H | 3.940129  | -3.319085 | 0.540376  |
| H | 4.374748  | -1.968134 | -0.511484 |
| H | 5.064440  | -2.088484 | 1.107245  |
| H | 2.496858  | -2.940829 | 2.608401  |
| H | 1.842843  | -1.339152 | 2.969753  |
| H | 3.563743  | -1.656533 | 3.183395  |
| H | 0.739643  | 1.486636  | -2.011191 |
| H | 2.307401  | -2.291726 | -3.270008 |
| H | 0.696516  | -2.306923 | -2.575017 |
| H | 2.102818  | -2.072515 | -1.538096 |
| H | 3.023206  | 1.348311  | -2.913921 |
| H | 3.549728  | 0.094376  | -1.789881 |
| H | 3.628270  | -0.189073 | -3.525210 |
| H | 0.945170  | 1.021708  | -4.356170 |
| H | 1.653894  | -0.494829 | -4.910591 |
| H | 0.018315  | -0.482581 | -4.267333 |
| H | -1.461090 | 0.693835  | -2.150527 |
| H | -0.912938 | -0.981832 | -2.274711 |
| H | -1.795371 | 2.333101  | 3.571937  |
| H | -3.543305 | 2.584197  | 3.353025  |
| H | -2.372012 | 3.573958  | 2.435401  |

B3LYP energy = -1507.78916878 a.u.

(5*S*,1'*R*)-**8b**, Conf. B

|   |          |           |           |
|---|----------|-----------|-----------|
| C | 1.946179 | 3.145635  | -0.079021 |
| C | 1.776734 | 4.462584  | 0.344480  |
| C | 1.833984 | 4.765940  | 1.702509  |
| C | 2.059461 | 3.768170  | 2.639677  |
| C | 2.235393 | 2.454623  | 2.210557  |
| C | 2.182067 | 2.119872  | 0.860365  |
| C | 2.389757 | 0.705801  | 0.348046  |
| C | 3.142770 | -0.229277 | 1.317616  |
| C | 3.536160 | -1.557320 | 0.709591  |
| C | 2.879846 | -2.736257 | 1.068545  |

|   |           |           |           |
|---|-----------|-----------|-----------|
| C | 3.237942  | -3.955716 | 0.497851  |
| C | 4.262427  | -4.012603 | -0.441157 |
| C | 4.931920  | -2.844884 | -0.799793 |
| C | 4.572327  | -1.629765 | -0.227373 |
| N | 1.097004  | 0.104318  | -0.084787 |
| C | -0.066066 | 0.261577  | 0.488533  |
| N | -1.084560 | -0.298110 | -0.143067 |
| C | -2.384314 | -0.448437 | 0.490909  |
| C | -2.676634 | -1.654833 | 1.157247  |
| C | -1.663155 | -2.776242 | 1.362817  |
| C | -1.350778 | -2.965372 | 2.858846  |
| C | -2.116659 | -4.101486 | 0.728451  |
| C | -3.949887 | -1.797587 | 1.709977  |
| C | -4.881375 | -0.773072 | 1.647082  |
| C | -4.546060 | 0.429958  | 1.046271  |
| C | -3.295357 | 0.625773  | 0.457487  |
| C | -2.971010 | 1.991772  | -0.135377 |
| C | -4.008759 | 2.443541  | -1.176603 |
| C | -2.827858 | 3.051944  | 0.972154  |
| C | -0.565254 | -1.060594 | -1.346619 |
| C | -1.274902 | -0.869171 | -2.716521 |
| C | -1.242393 | 0.579062  | -3.224926 |
| C | -2.730805 | -1.362200 | -2.649631 |
| C | -0.516496 | -1.771638 | -3.715113 |
| C | 0.934868  | -0.651690 | -1.340642 |
| C | 1.775318  | 3.755009  | -2.400903 |
| O | 1.893848  | 2.755223  | -1.384239 |
| H | 1.604543  | 5.253886  | -0.370367 |
| H | 1.701489  | 5.792582  | 2.020204  |
| H | 2.107651  | 4.004384  | 3.694434  |
| H | 2.425905  | 1.685397  | 2.946837  |
| H | 2.965661  | 0.774232  | -0.574784 |
| H | 4.040276  | 0.304770  | 1.636808  |
| H | 2.539001  | -0.401737 | 2.210689  |
| H | 2.089905  | -2.704570 | 1.810220  |
| H | 2.721426  | -4.860814 | 0.793295  |
| H | 4.544959  | -4.959917 | -0.883167 |
| H | 5.740868  | -2.882319 | -1.519082 |
| H | 5.110787  | -0.729922 | -0.504839 |
| H | -0.191726 | 0.805720  | 1.413613  |
| H | -0.724563 | -2.491514 | 0.888479  |
| H | -0.574732 | -3.723069 | 2.986766  |
| H | -0.998294 | -2.037175 | 3.313163  |
| H | -2.231494 | -3.294568 | 3.413068  |
| H | -3.034011 | -4.470552 | 1.190930  |
| H | -1.347989 | -4.865259 | 0.862924  |
| H | -2.304622 | -3.995555 | -0.341590 |
| H | -4.208350 | -2.718605 | 2.216215  |
| H | -5.862820 | -0.905054 | 2.085390  |
| H | -5.269116 | 1.235201  | 1.035468  |
| H | -2.008624 | 1.922991  | -0.641219 |
| H | -3.687100 | 3.377536  | -1.642124 |
| H | -4.143236 | 1.701622  | -1.964966 |
| H | -4.983098 | 2.624399  | -0.719375 |
| H | -2.552186 | 4.015340  | 0.538182  |
| H | -2.061760 | 2.778841  | 1.700101  |

|   |           |           |           |
|---|-----------|-----------|-----------|
| H | -3.767311 | 3.184033  | 1.512517  |
| H | -0.652820 | -2.118712 | -1.100648 |
| H | -1.710667 | 0.625287  | -4.209654 |
| H | -0.226735 | 0.962735  | -3.333819 |
| H | -1.790311 | 1.254531  | -2.570786 |
| H | -2.785815 | -2.395507 | -2.300622 |
| H | -3.348635 | -0.751572 | -1.993742 |
| H | -3.172013 | -1.326745 | -3.647535 |
| H | -0.504714 | -2.812822 | -3.383632 |
| H | -1.014580 | -1.737674 | -4.685151 |
| H | 0.515742  | -1.450800 | -3.868261 |
| H | 1.599793  | -1.511376 | -1.347874 |
| H | 1.194468  | 0.004436  | -2.170346 |
| H | 1.804486  | 3.219648  | -3.346040 |
| H | 2.607275  | 4.460843  | -2.355701 |
| H | 0.828855  | 4.293466  | -2.317090 |

B3LYP energy = -1507.78797889 a.u.

(5S,1'R)-**8b**, Conf. C

|   |           |           |           |
|---|-----------|-----------|-----------|
| C | 2.807094  | -2.537535 | 0.089276  |
| C | 3.017824  | -3.848537 | -0.333972 |
| C | 3.146405  | -4.125444 | -1.692902 |
| C | 3.069617  | -3.106102 | -2.630514 |
| C | 2.866476  | -1.796336 | -2.201129 |
| C | 2.729930  | -1.488600 | -0.850720 |
| C | 2.525615  | -0.073041 | -0.339834 |
| C | 2.948324  | 1.038231  | -1.322406 |
| C | 2.857957  | 2.432949  | -0.745312 |
| C | 1.856698  | 3.311868  | -1.162363 |
| C | 1.761868  | 4.594264  | -0.626992 |
| C | 2.673086  | 5.016924  | 0.335146  |
| C | 3.681546  | 4.151956  | 0.754000  |
| C | 3.772695  | 2.872292  | 0.217023  |
| N | 1.124157  | 0.129135  | 0.123945  |
| C | 0.035398  | -0.229197 | -0.501895 |
| N | -1.091012 | 0.011051  | 0.148234  |
| C | -2.391106 | -0.085352 | -0.494724 |
| C | -2.999997 | -1.348594 | -0.634222 |
| C | -2.329160 | -2.659389 | -0.242299 |
| C | -3.199817 | -3.511925 | 0.695124  |
| C | -1.935582 | -3.467579 | -1.493208 |
| C | -4.270371 | -1.393916 | -1.211496 |
| C | -4.912338 | -0.241601 | -1.636118 |
| C | -4.271549 | 0.983165  | -1.534067 |
| C | -2.992317 | 1.090294  | -0.986926 |
| C | -2.301289 | 2.450090  | -1.015639 |
| C | -2.115556 | 2.940186  | -2.463634 |
| C | -3.043292 | 3.504468  | -0.177679 |
| C | -0.775465 | 0.716359  | 1.452614  |
| C | -1.403439 | 0.162784  | 2.763675  |
| C | -0.988150 | -1.282482 | 3.074391  |
| C | -2.938092 | 0.261112  | 2.718621  |
| C | -0.904467 | 1.087122  | 3.896131  |
| C | 0.780499  | 0.708736  | 1.435142  |
| C | 2.860201  | -3.161257 | 2.413720  |

|   |           |           |           |   |           |           |           |
|---|-----------|-----------|-----------|---|-----------|-----------|-----------|
| O | 2.660345  | -2.175506 | 1.395898  | C | -1.969652 | -0.229115 | -0.072209 |
| H | 3.086525  | -4.654654 | 0.381829  | C | -2.725370 | -1.421112 | -0.694381 |
| H | 3.309453  | -5.147806 | -2.010280 | C | -4.072173 | -1.665293 | -0.047195 |
| H | 3.174974  | -3.319662 | -3.685954 | C | -5.261727 | -1.426811 | -0.736419 |
| H | 2.828247  | -1.006310 | -2.938991 | C | -6.495205 | -1.664285 | -0.135755 |
| H | 3.115762  | 0.035513  | 0.569526  | C | -6.556540 | -2.145375 | 1.167599  |
| H | 3.978055  | 0.825575  | -1.617819 | C | -5.376507 | -2.391612 | 1.864921  |
| H | 2.340620  | 0.984515  | -2.227410 | C | -4.146928 | -2.155190 | 1.260260  |
| H | 1.152235  | 2.994947  | -1.923076 | N | -0.541533 | -0.256378 | -0.478465 |
| H | 0.981607  | 5.264016  | -0.967402 | C | 0.475292  | -0.275901 | 0.342415  |
| H | 2.605420  | 6.015220  | 0.749149  | N | 1.663078  | -0.261957 | -0.236874 |
| H | 4.403426  | 4.477730  | 1.492839  | C | 2.888259  | -0.011055 | 0.501872  |
| H | 4.569818  | 2.213416  | 0.543768  | C | 3.445646  | 1.282192  | 0.458918  |
| H | 0.047201  | -0.687017 | -1.480652 | C | 2.766093  | 2.475781  | -0.204782 |
| H | -1.408829 | -2.425820 | 0.291274  | C | 2.396034  | 3.543676  | 0.840558  |
| H | -2.645539 | -4.395934 | 1.017016  | C | 3.617094  | 3.083469  | -1.331965 |
| H | -3.499041 | -2.957641 | 1.585760  | C | 4.658151  | 1.486541  | 1.119134  |
| H | -4.107072 | -3.857343 | 0.196657  | C | 5.271269  | 0.468161  | 1.831742  |
| H | -2.818627 | -3.764310 | -2.062833 | C | 4.665343  | -0.775185 | 1.920479  |
| H | -1.402684 | -4.375666 | -1.203554 | C | 3.463099  | -1.047027 | 1.265212  |
| H | -1.288476 | -2.894777 | -2.160399 | C | 2.812959  | -2.410860 | 1.462966  |
| H | -4.764192 | -2.349542 | -1.329935 | C | 3.762020  | -3.578902 | 1.151218  |
| H | -5.904303 | -0.300455 | -2.066541 | C | 2.247022  | -2.541061 | 2.890080  |
| H | -4.764895 | 1.871308  | -1.907087 | C | 1.489454  | -0.215297 | -1.740354 |
| H | -1.299707 | 2.343828  | -0.600318 | C | 2.140639  | -1.357723 | -2.572374 |
| H | -3.074577 | 3.132224  | -2.947897 | C | 1.594154  | -2.746712 | -2.212587 |
| H | -1.546983 | 3.872700  | -2.473179 | C | 3.670107  | -1.336834 | -2.408286 |
| H | -1.577376 | 2.206734  | -3.067293 | C | 1.823013  | -1.054176 | -4.052636 |
| H | -3.159077 | 3.191247  | 0.861408  | C | -0.060004 | -0.131607 | -1.867070 |
| H | -4.040434 | 3.698121  | -0.577607 | C | -1.525787 | 2.703776  | 2.836219  |
| H | -2.493427 | 4.447758  | -0.187129 | O | -1.639750 | 1.783441  | 1.746399  |
| H | -1.134589 | 1.739328  | 1.345757  | H | -2.750617 | 4.195777  | 1.206452  |
| H | -1.438916 | -1.592511 | 4.018705  | H | -3.983520 | 4.721519  | -0.846790 |
| H | 0.091920  | -1.394633 | 3.181275  | H | -4.306418 | 2.987813  | -2.595309 |
| H | -1.324958 | -1.978140 | 2.307879  | H | -3.408909 | 0.729166  | -2.251060 |
| H | -3.267164 | 1.276947  | 2.490624  | H | -1.947281 | -0.381152 | 1.005085  |
| H | -3.377750 | -0.408755 | 1.982052  | H | -2.850786 | -1.288413 | -1.769286 |
| H | -3.346562 | -0.006189 | 3.694973  | H | -2.094639 | -2.304112 | -0.560941 |
| H | -1.180952 | 2.128144  | 3.712574  | H | -5.227835 | -1.055120 | -1.753533 |
| H | -1.360381 | 0.783692  | 4.839782  | H | -7.407071 | -1.474775 | -0.688699 |
| H | 0.178216  | 1.040125  | 4.027851  | H | -7.515111 | -2.331714 | 1.635658  |
| H | 1.202147  | 1.707404  | 1.521564  | H | -5.413687 | -2.774951 | 2.877276  |
| H | 1.206988  | 0.075903  | 2.211168  | H | -3.235900 | -2.366076 | 1.810024  |
| H | 3.860554  | -3.594342 | 2.349173  | H | 0.352984  | -0.282214 | 1.415757  |
| H | 2.109767  | -3.952071 | 2.350596  | H | 1.826647  | 2.144052  | -0.645571 |
| H | 2.753315  | -2.635559 | 3.358847  | H | 1.840224  | 4.355430  | 0.366582  |

B3LYP energy = -1507.78791330 a.u.

(5*S*,1'*R*)-**8b**, Conf. D

|   |           |          |           |   |          |           |          |
|---|-----------|----------|-----------|---|----------|-----------|----------|
| C | -2.360190 | 2.150698 | 0.645651  | H | 4.594485 | -3.623091 | 1.855556 |
| C | -2.883200 | 3.429134 | 0.457037  |   |          |           |          |
| C | -3.582056 | 3.725188 | -0.709951 |   |          |           |          |
| C | -3.763064 | 2.757763 | -1.688305 |   |          |           |          |
| C | -3.249056 | 1.479453 | -1.487760 |   |          |           |          |
| C | -2.552140 | 1.149833 | -0.329065 |   |          |           |          |

|   |           |           |           |
|---|-----------|-----------|-----------|
| H | 3.221995  | -4.525129 | 1.223870  |
| H | 4.178176  | -3.504197 | 0.145544  |
| H | 1.725039  | -3.493575 | 3.003809  |
| H | 1.543916  | -1.738613 | 3.124764  |
| H | 3.045353  | -2.505388 | 3.634087  |
| H | 1.938072  | 0.714581  | -2.083718 |
| H | 2.053294  | -3.496574 | -2.859040 |
| H | 0.513730  | -2.821839 | -2.352843 |
| H | 1.821868  | -3.021470 | -1.183416 |
| H | 4.083556  | -0.357903 | -2.661249 |
| H | 3.984690  | -1.582583 | -1.396026 |
| H | 4.118367  | -2.069294 | -3.082037 |
| H | 2.185967  | -0.065761 | -4.344271 |
| H | 2.318236  | -1.790601 | -4.687159 |
| H | 0.755051  | -1.103792 | -4.273026 |
| H | -0.395176 | 0.817177  | -2.284621 |
| H | -0.467637 | -0.938341 | -2.470529 |
| H | -2.510160 | 2.982242  | 3.217617  |
| H | -0.975998 | 3.599806  | 2.540626  |
| H | -0.972119 | 2.178576  | 3.609988  |

B3LYP energy = -1507.78769920 a.u.

(5*S*,1'*R*)-**8b**, Conf. E

|   |           |           |           |
|---|-----------|-----------|-----------|
| C | -2.518126 | -1.868127 | 0.314851  |
| C | -3.221693 | -3.067461 | 0.205131  |
| C | -4.096561 | -3.268739 | -0.859164 |
| C | -4.274783 | -2.284566 | -1.820671 |
| C | -3.566622 | -1.092031 | -1.707395 |
| C | -2.688823 | -0.858176 | -0.651998 |
| C | -1.958714 | 0.471923  | -0.580115 |
| C | -2.295264 | 1.350149  | 0.645283  |
| C | -3.743107 | 1.788344  | 0.651554  |
| C | -4.164931 | 2.848842  | -0.155150 |
| C | -5.495558 | 3.254014  | -0.160945 |
| C | -6.426362 | 2.604189  | 0.645249  |
| C | -6.016599 | 1.550674  | 1.456291  |
| C | -4.684325 | 1.147272  | 1.458517  |
| N | -0.496665 | 0.283552  | -0.733512 |
| C | 0.445665  | 0.436432  | 0.157340  |
| N | 1.664663  | 0.126807  | -0.258015 |
| C | 2.853194  | 0.595909  | 0.439806  |
| C | 3.360374  | -0.141578 | 1.527049  |
| C | 2.668626  | -1.363606 | 2.117682  |
| C | 3.589542  | -2.592711 | 2.187453  |
| C | 2.097937  | -1.040641 | 3.511529  |
| C | 4.534685  | 0.316741  | 2.127364  |
| C | 5.176211  | 1.460905  | 1.680923  |
| C | 4.626318  | 2.201271  | 0.646166  |
| C | 3.445986  | 1.803062  | 0.017303  |
| C | 2.834334  | 2.725401  | -1.032711 |
| C | 2.394924  | 4.058834  | -0.399892 |
| C | 3.776544  | 2.969189  | -2.222818 |
| C | 1.606507  | -0.314822 | -1.704269 |
| C | 2.243182  | -1.686623 | -2.066218 |
| C | 2.008797  | -1.888870 | -3.578903 |

|   |           |           |           |
|---|-----------|-----------|-----------|
| C | 1.619396  | -2.858654 | -1.295941 |
| C | 3.762231  | -1.647350 | -1.828937 |
| C | 0.081752  | -0.219265 | -1.993245 |
| C | -1.507841 | -2.553849 | 2.386667  |
| O | -1.644044 | -1.598811 | 1.329970  |
| H | -3.097572 | -3.847554 | 0.941744  |
| H | -4.637246 | -4.204448 | -0.927715 |
| H | -4.955350 | -2.437411 | -2.647780 |
| H | -3.705495 | -0.317161 | -2.452450 |
| H | -2.248902 | 1.038271  | -1.468005 |
| H | -2.070581 | 0.808592  | 1.562774  |
| H | -1.657514 | 2.237965  | 0.610781  |
| H | -3.445841 | 3.371015  | -0.777427 |
| H | -5.804038 | 4.081326  | -0.788371 |
| H | -7.462053 | 2.920558  | 0.644675  |
| H | -6.732951 | 1.043423  | 2.090850  |
| H | -4.373930 | 0.328252  | 2.096606  |
| H | 0.261925  | 0.807888  | 1.153424  |
| H | 1.826772  | -1.620544 | 1.475991  |
| H | 3.029759  | -3.457602 | 2.549586  |
| H | 4.004338  | -2.845263 | 1.210813  |
| H | 4.423163  | -2.431190 | 2.873153  |
| H | 2.891540  | -0.769015 | 4.210290  |
| H | 1.581160  | -1.911999 | 3.919229  |
| H | 1.388880  | -0.210535 | 3.477035  |
| H | 4.949850  | -0.231929 | 2.962573  |
| H | 6.092814  | 1.789027  | 2.155195  |
| H | 5.111067  | 3.116759  | 0.333099  |
| H | 1.929873  | 2.261105  | -1.423369 |
| H | 3.248618  | 4.616855  | -0.011137 |
| H | 1.900624  | 4.683026  | -1.147435 |
| H | 1.697410  | 3.897194  | 0.424532  |
| H | 3.279037  | 3.582066  | -2.977216 |
| H | 4.084503  | 2.033528  | -2.693335 |
| H | 4.680092  | 3.497150  | -1.912802 |
| H | 2.139336  | 0.436055  | -2.285695 |
| H | 2.507369  | -2.803322 | -3.903690 |
| H | 2.421287  | -1.061446 | -4.161303 |
| H | 0.951422  | -1.989676 | -3.829752 |
| H | 1.788673  | -2.777515 | -0.223407 |
| H | 0.543994  | -2.943836 | -1.463378 |
| H | 2.070979  | -3.794414 | -1.629759 |
| H | 4.017414  | -1.529942 | -0.777629 |
| H | 4.210711  | -2.579235 | -2.178198 |
| H | 4.227321  | -0.827878 | -2.381613 |
| H | -0.151146 | 0.472565  | -2.802192 |
| H | -0.361056 | -1.184983 | -2.226877 |
| H | -1.094083 | -3.494859 | 2.017700  |
| H | -2.467037 | -2.739618 | 2.874239  |
| H | -0.820146 | -2.109761 | 3.100460  |

B3LYP energy = -1507.78748250 a.u.

(5*S*,1'*R*)-**8b**, Conf. F

|   |          |           |           |
|---|----------|-----------|-----------|
| C | 4.547361 | -0.647204 | 0.103465  |
| C | 5.432254 | -1.680906 | -0.205180 |

|   |           |           |           |                                                 |           |           |           |
|---|-----------|-----------|-----------|-------------------------------------------------|-----------|-----------|-----------|
| C | 5.009280  | -2.743628 | -0.998408 | H                                               | -6.249417 | 0.281897  | -1.237837 |
| C | 3.710797  | -2.786307 | -1.487951 | H                                               | -4.815169 | -1.246484 | -2.521158 |
| C | 2.831673  | -1.753606 | -1.174168 | H                                               | -1.267432 | -2.014279 | -1.672225 |
| C | 3.225142  | -0.682361 | -0.379250 | H                                               | -3.788429 | -3.206900 | -2.917947 |
| C | 2.290942  | 0.476503  | -0.062127 | H                                               | -2.173490 | -3.907019 | -2.905397 |
| C | 2.266762  | 1.507714  | -1.206715 | H                                               | -3.073409 | -3.735563 | -1.395317 |
| C | 1.540831  | 2.808012  | -0.924078 | H                                               | -1.280135 | -1.866601 | -4.126338 |
| C | 0.606201  | 3.307272  | -1.834011 | H                                               | -1.455603 | -0.249281 | -3.433599 |
| C | -0.030468 | 4.526196  | -1.612912 | H                                               | -2.858639 | -1.076644 | -4.103596 |
| C | 0.259525  | 5.266617  | -0.472510 | H                                               | -1.304472 | -0.535362 | 2.356284  |
| C | 1.193316  | 4.782766  | 0.440300  | H                                               | -2.773423 | -3.897859 | 2.107145  |
| C | 1.829367  | 3.566847  | 0.214911  | H                                               | -3.043280 | -2.694062 | 0.851411  |
| N | 0.949841  | -0.007917 | 0.317156  | H                                               | -3.104007 | -2.225513 | 2.551002  |
| C | -0.179924 | 0.088331  | -0.334067 | H                                               | 0.544546  | -2.792444 | 3.310953  |
| N | -1.215616 | -0.484459 | 0.255834  | H                                               | -1.002584 | -2.265786 | 3.989900  |
| C | -2.582143 | -0.251521 | -0.180643 | H                                               | -0.773141 | -3.941478 | 3.492240  |
| C | -3.363844 | 0.689280  | 0.519306  | H                                               | 0.697450  | -3.387792 | 0.788148  |
| C | -2.827335 | 1.576222  | 1.638456  | H                                               | -0.580348 | -4.557099 | 1.073560  |
| C | -2.948956 | 3.066501  | 1.272656  | H                                               | -0.763848 | -3.364518 | -0.202946 |
| C | -3.515523 | 1.293132  | 2.984889  | H                                               | 0.982695  | -0.041616 | 2.418947  |
| C | -4.693231 | 0.846247  | 0.124540  | H                                               | 1.376999  | -1.581303 | 1.645112  |
| C | -5.215792 | 0.140210  | -0.947517 | H                                               | 6.948829  | 0.565760  | 0.598622  |
| C | -4.406650 | -0.727389 | -1.663952 | H                                               | 6.414970  | -0.304348 | 2.065947  |
| C | -3.076025 | -0.945775 | -1.303196 | H                                               | 6.227823  | 1.462018  | 1.955311  |
| C | -2.226148 | -1.868954 | -2.168230 | B3LYP energy = -1507.78740473 a.u.              |           |           |           |
| C | -2.856653 | -3.259011 | -2.352405 | (5 <i>S</i> ,1' <i>R</i> )- <b>8b</b> , Conf. G |           |           |           |
| C | -1.937275 | -1.223951 | -3.536567 | C                                               | 3.505098  | -1.528388 | 0.591326  |
| C | -0.781300 | -1.084446 | 1.576023  | C                                               | 4.109353  | -2.702809 | 0.135392  |
| C | -1.073612 | -2.593367 | 1.822735  | C                                               | 3.689003  | -3.286103 | -1.054934 |
| C | -2.588730 | -2.859349 | 1.826171  | C                                               | 2.665936  | -2.713261 | -1.800641 |
| C | -0.538386 | -2.907070 | 3.236899  | C                                               | 2.070715  | -1.542965 | -1.343410 |
| C | -0.386122 | -3.516736 | 0.807117  | C                                               | 2.474131  | -0.933275 | -0.159015 |
| C | 0.727923  | -0.709779 | 1.596548  | C                                               | 1.824606  | 0.359512  | 0.313695  |
| C | 6.202457  | 0.531166  | 1.395118  | C                                               | 2.069281  | 1.561602  | -0.623697 |
| O | 4.880492  | 0.438388  | 0.858334  | C                                               | 3.525250  | 1.971052  | -0.673329 |
| H | 6.447556  | -1.663796 | 0.163415  | C                                               | 4.066674  | 2.773405  | 0.334383  |
| H | 5.706521  | -3.538667 | -1.231357 | C                                               | 5.403996  | 3.153415  | 0.300129  |
| H | 3.382433  | -3.611307 | -2.106302 | C                                               | 6.221593  | 2.736369  | -0.746964 |
| H | 1.817658  | -1.792043 | -1.553935 | C                                               | 5.691920  | 1.940679  | -1.757803 |
| H | 2.671651  | 0.968409  | 0.832119  | C                                               | 4.352857  | 1.562173  | -1.720418 |
| H | 3.317187  | 1.721803  | -1.418360 | N                                               | 0.377065  | 0.151632  | 0.550519  |
| H | 1.876930  | 1.044261  | -2.116790 | C                                               | -0.632019 | 0.486922  | -0.209270 |
| H | 0.384107  | 2.748329  | -2.736689 | N                                               | -1.812078 | 0.052929  | 0.201646  |
| H | -0.748366 | 4.896184  | -2.334515 | C                                               | -3.052405 | 0.581291  | -0.341875 |
| H | -0.232449 | 6.215228  | -0.297851 | C                                               | -3.537409 | 0.077666  | -1.565126 |
| H | 1.434466  | 5.358309  | 1.325618  | C                                               | -2.782356 | -0.931562 | -2.421517 |
| H | 2.569163  | 3.219676  | 0.926972  | C                                               | -3.639253 | -2.151230 | -2.798026 |
| H | -0.278339 | 0.609668  | -1.273212 | C                                               | -2.220345 | -0.258294 | -3.688010 |
| H | -1.762056 | 1.380597  | 1.758802  | C                                               | -4.751106 | 0.582245  | -2.034610 |
| H | -2.492268 | 3.678974  | 2.052787  | C                                               | -5.452461 | 1.548407  | -1.330693 |
| H | -2.445763 | 3.289034  | 0.330458  | C                                               | -4.928268 | 2.065184  | -0.156399 |
| H | -3.992457 | 3.372261  | 1.179745  | C                                               | -3.710061 | 1.614298  | 0.354177  |
| H | -4.580449 | 1.528928  | 2.937813  | C                                               | -3.137157 | 2.305995  | 1.587484  |
| H | -3.073682 | 1.908733  | 3.771135  | C                                               | -2.858815 | 3.793483  | 1.304106  |
| H | -3.422846 | 0.246525  | 3.280914  |                                                 |           |           |           |
| H | -5.323270 | 1.550745  | 0.651937  |                                                 |           |           |           |

|   |           |           |           |
|---|-----------|-----------|-----------|
| C | -4.042595 | 2.146222  | 2.819643  |
| C | -1.645926 | -0.713578 | 1.497103  |
| C | -2.232993 | -2.151560 | 1.576158  |
| C | -3.763222 | -2.120956 | 1.419892  |
| C | -1.914175 | -2.666166 | 2.997178  |
| C | -1.622908 | -3.111582 | 0.544627  |
| C | -0.105322 | -0.640195 | 1.697397  |
| C | 4.924583  | -1.433399 | 2.532603  |
| O | 3.852184  | -0.903045 | 1.750324  |
| H | 4.904766  | -3.164537 | 0.701528  |
| H | 4.168186  | -4.195593 | -1.395302 |
| H | 2.337031  | -3.168087 | -2.725703 |
| H | 1.273708  | -1.095844 | -1.927003 |
| H | 2.232475  | 0.606304  | 1.292150  |
| H | 1.728852  | 1.324269  | -1.633450 |
| H | 1.473356  | 2.404238  | -0.263012 |
| H | 3.436146  | 3.112786  | 1.149001  |
| H | 5.805827  | 3.780416  | 1.086664  |
| H | 7.262200  | 3.034771  | -0.777123 |
| H | 6.319102  | 1.616844  | -2.579331 |
| H | 3.948673  | 0.945642  | -2.514611 |
| H | -0.527719 | 1.089848  | -1.098869 |
| H | -1.932387 | -1.296715 | -1.846362 |
| H | -3.032160 | -2.880270 | -3.338547 |
| H | -4.052521 | -2.643896 | -1.916694 |
| H | -4.471682 | -1.872543 | -3.446596 |
| H | -3.025978 | 0.100887  | -4.331451 |
| H | -1.625299 | -0.971008 | -4.263014 |
| H | -1.585988 | 0.597766  | -3.447198 |
| H | -5.152367 | 0.214665  | -2.969956 |
| H | -6.398160 | 1.915243  | -1.709879 |
| H | -5.464281 | 2.849450  | 0.362504  |
| H | -2.173909 | 1.856495  | 1.826964  |
| H | -3.780359 | 4.341115  | 1.099486  |
| H | -2.382183 | 4.256259  | 2.170924  |
| H | -2.197481 | 3.918402  | 0.444456  |
| H | -3.578014 | 2.611039  | 3.691613  |
| H | -4.228286 | 1.096321  | 3.052642  |
| H | -5.010358 | 2.626565  | 2.664135  |
| H | -2.144444 | -0.131791 | 2.270916  |
| H | -4.164156 | -3.123945 | 1.577324  |
| H | -4.074718 | -1.790900 | 0.430583  |
| H | -4.225800 | -1.461708 | 2.157715  |
| H | -0.842396 | -2.780272 | 3.169977  |
| H | -2.314376 | -1.997851 | 3.763568  |
| H | -2.371419 | -3.646449 | 3.139768  |
| H | -0.539487 | -3.201143 | 0.642240  |
| H | -2.039940 | -4.109771 | 0.688480  |
| H | -1.846123 | -2.810109 | -0.477676 |
| H | 0.176606  | -0.141779 | 2.624055  |
| H | 0.366914  | -1.620181 | 1.674856  |
| H | 5.857453  | -1.444847 | 1.964948  |
| H | 4.694858  | -2.440908 | 2.887355  |
| H | 5.026253  | -0.764314 | 3.382842  |

B3LYP) energy = -1507.78674298 a.u.

(5*S*,1'*R*)-**8b**, Conf. H

|   |           |           |           |
|---|-----------|-----------|-----------|
| C | 2.298140  | -2.255153 | 0.001066  |
| C | 2.550017  | -3.378547 | -0.785135 |
| C | 2.794700  | -3.229643 | -2.147659 |
| C | 2.790766  | -1.971285 | -2.732211 |
| C | 2.546963  | -0.852039 | -1.940306 |
| C | 2.299727  | -0.967280 | -0.575731 |
| C | 2.031232  | 0.223232  | 0.323239  |
| C | 2.625287  | 1.575806  | -0.125283 |
| C | 4.137165  | 1.628093  | -0.066854 |
| C | 4.807583  | 1.479127  | 1.151232  |
| C | 6.195278  | 1.540328  | 1.214029  |
| C | 6.938692  | 1.759400  | 0.057132  |
| C | 6.283032  | 1.919212  | -1.158823 |
| C | 4.893475  | 1.853451  | -1.217917 |
| N | 0.571043  | 0.381684  | 0.567010  |
| C | -0.405362 | 0.107546  | -0.255739 |
| N | -1.619669 | 0.315554  | 0.226785  |
| C | -2.794259 | 0.352579  | -0.630568 |
| C | -3.420152 | -0.853443 | -1.003106 |
| C | -2.878877 | -2.232495 | -0.647304 |
| C | -3.927031 | -3.120432 | 0.043315  |
| C | -2.315661 | -2.938872 | -1.894916 |
| C | -4.571884 | -0.768335 | -1.787548 |
| C | -5.081299 | 0.454987  | -2.193010 |
| C | -4.417760 | 1.624672  | -1.857643 |
| C | -3.251082 | 1.603298  | -1.092234 |
| C | -2.507440 | 2.915652  | -0.864871 |
| C | -2.009300 | 3.497699  | -2.200549 |
| C | -3.352165 | 3.948421  | -0.100436 |
| C | -1.513950 | 0.876703  | 1.629641  |
| C | -2.317956 | 0.176643  | 2.762317  |
| C | -1.923211 | -1.292883 | 2.967325  |
| C | -3.829081 | 0.278460  | 2.493681  |
| C | -2.013716 | 0.966826  | 4.054240  |
| C | 0.027243  | 0.875534  | 1.844484  |
| C | 2.109582  | -3.568571 | 2.009463  |
| O | 2.031633  | -2.308680 | 1.336466  |
| H | 2.559587  | -4.366323 | -0.348124 |
| H | 2.989761  | -4.109371 | -2.748163 |
| H | 2.985568  | -1.855039 | -3.790120 |
| H | 2.559480  | 0.125882  | -2.401633 |
| H | 2.434662  | -0.017019 | 1.306172  |
| H | 2.275948  | 1.824034  | -1.128569 |
| H | 2.218105  | 2.345438  | 0.536251  |
| H | 4.243809  | 1.322801  | 2.064291  |
| H | 6.696282  | 1.423542  | 2.167238  |
| H | 8.019407  | 1.808396  | 0.104963  |
| H | 6.851371  | 2.095995  | -2.063728 |
| H | 4.394928  | 1.985579  | -2.171198 |
| H | -0.236883 | -0.257409 | -1.258111 |
| H | -2.051712 | -2.103955 | 0.049182  |
| H | -3.472944 | -4.066689 | 0.344718  |
| H | -4.339184 | -2.644564 | 0.934373  |
| H | -4.757537 | -3.353781 | -0.624977 |



|   |           |           |           |
|---|-----------|-----------|-----------|
| H | -3.103266 | -3.135202 | -2.625297 |
| H | -1.871625 | -3.896791 | -1.616098 |
| H | -1.547323 | -2.341610 | -2.390057 |
| H | -5.076074 | -1.677453 | -2.087880 |
| H | -5.983617 | 0.495762  | -2.790470 |
| H | -4.800221 | 2.571595  | -2.216338 |
| H | -1.617310 | 2.715735  | -0.269918 |
| H | -1.420452 | 4.399630  | -2.020399 |
| H | -1.381449 | 2.782136  | -2.735356 |
| H | -2.840807 | 3.767158  | -2.854177 |
| H | -2.764297 | 4.848943  | 0.088848  |
| H | -3.697768 | 3.561124  | 0.859901  |
| H | -4.232564 | 4.243807  | -0.674069 |
| H | -1.875370 | 1.902789  | 1.583434  |
| H | -2.490207 | -1.706208 | 3.803237  |
| H | -0.865138 | -1.413641 | 3.206608  |
| H | -2.141611 | -1.901991 | 2.091688  |
| H | -4.138800 | 1.315766  | 2.349784  |
| H | -4.135993 | -0.288059 | 1.616677  |
| H | -4.377715 | -0.114655 | 3.351540  |
| H | -2.268314 | 2.023929  | 3.946036  |
| H | -2.610039 | 0.564290  | 4.874339  |
| H | -0.965395 | 0.896775  | 4.350933  |
| H | 0.414965  | 1.870330  | 2.058384  |
| H | 0.341245  | 0.202866  | 2.640777  |
| H | 3.105291  | -4.005695 | 1.910882  |
| H | 1.359543  | -4.266021 | 1.630044  |
| H | 1.908807  | -3.356207 | 3.056162  |

B3LYP energy = -1507.78669495 a.u.

(5*S*,1'*R*)-**8b**, Conf. I

|   |           |           |           |
|---|-----------|-----------|-----------|
| C | -2.422756 | 2.593002  | -0.869609 |
| C | -2.725328 | 3.954459  | -0.876900 |
| C | -3.320097 | 4.545927  | 0.233244  |
| C | -3.617212 | 3.788018  | 1.356702  |
| C | -3.320439 | 2.429320  | 1.354062  |
| C | -2.727056 | 1.803613  | 0.257281  |
| C | -2.503972 | 0.299204  | 0.329928  |
| C | -3.142908 | -0.511670 | -0.824821 |
| C | -3.174147 | -2.001307 | -0.570264 |
| C | -4.099397 | -2.552705 | 0.322419  |
| C | -4.121354 | -3.920476 | 0.573312  |
| C | -3.217210 | -4.763441 | -0.068515 |
| C | -2.298661 | -4.229281 | -0.966364 |
| C | -2.280178 | -2.858790 | -1.215177 |
| N | -1.079690 | -0.074374 | 0.545886  |
| C | -0.037948 | 0.296339  | -0.152534 |
| N | 1.125583  | -0.124167 | 0.314936  |
| C | 2.351720  | -0.011839 | -0.457494 |
| C | 3.040597  | 1.217967  | -0.484297 |
| C | 2.529939  | 2.489377  | 0.183420  |
| C | 3.565319  | 3.115577  | 1.132004  |
| C | 2.076952  | 3.518925  | -0.868446 |
| C | 4.236036  | 1.274612  | -1.202943 |
| C | 4.731441  | 0.165340  | -1.869969 |

|   |           |           |           |
|---|-----------|-----------|-----------|
| C | 4.011684  | -1.018994 | -1.868443 |
| C | 2.798775  | -1.131000 | -1.187473 |
| C | 2.005978  | -2.426726 | -1.326498 |
| C | 1.626117  | -2.682716 | -2.796284 |
| C | 2.754409  | -3.635404 | -0.740369 |
| C | 0.897763  | -0.995925 | 1.532705  |
| C | 1.687090  | -0.671813 | 2.833769  |
| C | 3.200715  | -0.831721 | 2.609258  |
| C | 1.250341  | -1.730767 | 3.869727  |
| C | 1.392832  | 0.728630  | 3.391850  |
| C | -0.647425 | -0.905889 | 1.685936  |
| C | -1.661127 | 2.664806  | -3.161729 |
| O | -1.810437 | 1.963519  | -1.920962 |
| H | -2.500385 | 4.559933  | -1.742696 |
| H | -3.549383 | 5.603848  | 0.209515  |
| H | -4.081337 | 4.241828  | 2.222369  |
| H | -3.568598 | 1.831934  | 2.223808  |
| H | -2.986877 | -0.026626 | 1.249966  |
| H | -4.161719 | -0.133770 | -0.937491 |
| H | -2.618257 | -0.293826 | -1.752359 |
| H | -4.818780 | -1.908626 | 0.816739  |
| H | -4.850089 | -4.330192 | 1.262057  |
| H | -3.236653 | -5.829254 | 0.122215  |
| H | -1.601849 | -4.879868 | -1.480662 |
| H | -1.572611 | -2.453925 | -1.929838 |
| H | -0.134260 | 0.897624  | -1.045461 |
| H | 1.655749  | 2.233095  | 0.779872  |
| H | 3.123258  | 3.965537  | 1.655955  |
| H | 3.914924  | 2.402169  | 1.879542  |
| H | 4.436695  | 3.483281  | 0.587552  |
| H | 1.309707  | 3.112686  | -1.530239 |
| H | 2.915352  | 3.838598  | -1.490593 |
| H | 1.666790  | 4.403629  | -0.377122 |
| H | 4.787961  | 2.204873  | -1.240573 |
| H | 5.668244  | 0.230136  | -2.409402 |
| H | 4.386852  | -1.868044 | -2.425160 |
| H | 1.067551  | -2.323597 | -0.782571 |
| H | 2.509072  | -2.849350 | -3.415886 |
| H | 0.996424  | -3.571886 | -2.871543 |
| H | 1.075845  | -1.839245 | -3.217877 |
| H | 2.138482  | -4.533833 | -0.816193 |
| H | 3.007287  | -3.486427 | 0.310807  |
| H | 3.684490  | -3.823871 | -1.280056 |
| H | 1.175458  | -2.009528 | 1.246345  |
| H | 3.723054  | -0.710188 | 3.560053  |
| H | 3.600755  | -0.094124 | 1.916106  |
| H | 3.444169  | -1.824722 | 2.225349  |
| H | 0.193005  | -1.650445 | 4.129440  |
| H | 1.436510  | -2.744325 | 3.506551  |
| H | 1.821583  | -1.596794 | 4.789567  |
| H | 0.336281  | 0.876836  | 3.622811  |
| H | 1.945031  | 0.870176  | 4.322539  |
| H | 1.702510  | 1.515252  | 2.706246  |
| H | -1.128495 | -1.880549 | 1.632336  |
| H | -0.946351 | -0.419901 | 2.613325  |
| H | -0.983137 | 3.514272  | -3.057472 |

|   |           |          |           |
|---|-----------|----------|-----------|
| H | -2.628922 | 3.005485 | -3.534185 |
| H | -1.236049 | 1.945456 | -3.856665 |

B3LYP energy = -1507.78668404 a.u.

(5*S*,1'*R*)-**8b**, Conf. J

|   |           |           |           |
|---|-----------|-----------|-----------|
| C | 2.845031  | -2.136027 | -0.854242 |
| C | 3.392494  | -3.418503 | -0.854317 |
| C | 4.130545  | -3.864698 | 0.238281  |
| C | 4.330211  | -3.039049 | 1.335236  |
| C | 3.785942  | -1.758565 | 1.325887  |
| C | 3.043039  | -1.280937 | 0.246881  |
| C | 2.523630  | 0.147923  | 0.302638  |
| C | 2.956233  | 1.051615  | -0.872981 |
| C | 2.729452  | 2.526161  | -0.625777 |
| C | 1.788796  | 3.241155  | -1.368698 |
| C | 1.594914  | 4.604312  | -1.156373 |
| C | 2.340493  | 5.273394  | -0.192002 |
| C | 3.284332  | 4.572135  | 0.555156  |
| C | 3.476873  | 3.212522  | 0.337474  |
| N | 1.059591  | 0.212602  | 0.563640  |
| C | 0.072808  | -0.091187 | -0.240330 |
| N | -1.125364 | -0.083588 | 0.322213  |
| C | -2.355800 | -0.116194 | -0.451873 |
| C | -3.016965 | 1.099717  | -0.719931 |
| C | -2.450199 | 2.472366  | -0.369060 |
| C | -2.237325 | 3.320971  | -1.635569 |
| C | -3.330406 | 3.227759  | 0.641494  |
| C | -4.239145 | 1.038806  | -1.390955 |
| C | -4.766395 | -0.168109 | -1.821791 |
| C | -4.064108 | -1.343105 | -1.607576 |
| C | -2.847699 | -1.350343 | -0.922315 |
| C | -2.108708 | -2.674480 | -0.770413 |
| C | -2.966375 | -3.760003 | -0.099219 |
| C | -1.592803 | -3.169825 | -2.133767 |
| C | -1.001728 | 0.323607  | 1.775893  |
| C | -1.637219 | -0.600441 | 2.854913  |
| C | -1.348135 | 0.070730  | 4.215790  |
| C | -1.048501 | -2.018947 | 2.858376  |
| C | -3.164341 | -0.669534 | 2.681971  |
| C | 0.536255  | 0.495021  | 1.912777  |
| C | 2.093344  | -2.355726 | -3.133957 |
| O | 2.094773  | -1.646568 | -1.888840 |
| H | 3.247808  | -4.074693 | -1.699864 |
| H | 4.548552  | -4.863379 | 0.221400  |
| H | 4.906057  | -3.379578 | 2.185624  |
| H | 3.953034  | -1.105091 | 2.174639  |
| H | 2.949988  | 0.585791  | 1.203790  |
| H | 4.023071  | 0.863328  | -1.016543 |
| H | 2.463548  | 0.739550  | -1.790929 |
| H | 1.211532  | 2.731505  | -2.132180 |
| H | 0.866910  | 5.142793  | -1.750396 |
| H | 2.195265  | 6.334005  | -0.028791 |
| H | 3.878558  | 5.087191  | 1.300056  |
| H | 4.229595  | 2.684556  | 0.913333  |
| H | 0.228098  | -0.336242 | -1.280163 |

|   |           |           |           |
|---|-----------|-----------|-----------|
| H | -1.466792 | 2.341722  | 0.082037  |
| H | -1.771663 | 4.272342  | -1.372103 |
| H | -1.590554 | 2.813609  | -2.353430 |
| H | -3.183012 | 3.540073  | -2.133934 |
| H | -4.313194 | 3.449462  | 0.220828  |
| H | -2.863062 | 4.177123  | 0.910729  |
| H | -3.485578 | 2.654669  | 1.557196  |
| H | -4.777234 | 1.954834  | -1.597355 |
| H | -5.715506 | -0.190474 | -2.342851 |
| H | -4.468149 | -2.275664 | -1.979198 |
| H | -1.237355 | -2.510738 | -0.137893 |
| H | -3.813237 | -4.046650 | -0.725431 |
| H | -2.365862 | -4.656153 | 0.070363  |
| H | -3.359886 | -3.430815 | 0.863188  |
| H | -1.008101 | -4.083269 | -2.005512 |
| H | -0.959597 | -2.425982 | -2.619959 |
| H | -2.420351 | -3.394097 | -2.809709 |
| H | -1.488814 | 1.292611  | 1.870890  |
| H | -1.832887 | -0.498144 | 5.010476  |
| H | -1.740667 | 1.089904  | 4.249169  |
| H | -0.281990 | 0.107811  | 4.447328  |
| H | -1.252575 | -2.551065 | 1.931058  |
| H | 0.031000  | -2.025283 | 3.019881  |
| H | -1.496202 | -2.594797 | 3.670204  |
| H | -3.457581 | -1.157316 | 1.754515  |
| H | -3.597833 | -1.237012 | 3.507684  |
| H | -3.613449 | 0.325961  | 2.694734  |
| H | 0.821585  | 1.503224  | 2.209798  |
| H | 0.970684  | -0.211267 | 2.618084  |
| H | 1.600995  | -3.325142 | -3.039572 |
| H | 3.111691  | -2.491048 | -3.503109 |
| H | 1.534154  | -1.733826 | -3.828078 |

B3LYP energy = -1507.78618413 a.u.

(5*S*,1'*R*)-**8b**, Conf. K

|   |           |           |           |
|---|-----------|-----------|-----------|
| C | -4.147635 | 0.924391  | -0.146628 |
| C | -5.117918 | 1.905658  | 0.066027  |
| C | -5.228032 | 2.527788  | 1.305483  |
| C | -4.376773 | 2.179607  | 2.344573  |
| C | -3.415098 | 1.198761  | 2.128011  |
| C | -3.277043 | 0.554285  | 0.898592  |
| C | -2.214696 | -0.531444 | 0.782600  |
| C | -2.701112 | -1.879231 | 0.201579  |
| C | -1.746892 | -3.027969 | 0.438678  |
| C | -1.095033 | -3.650770 | -0.627462 |
| C | -0.234533 | -4.725003 | -0.412397 |
| C | -0.012052 | -5.193217 | 0.878054  |
| C | -0.658009 | -4.583480 | 1.950978  |
| C | -1.517854 | -3.513008 | 1.731165  |
| N | -0.994163 | -0.032268 | 0.099774  |
| C | 0.196532  | -0.002347 | 0.639530  |
| N | 1.158601  | 0.471335  | -0.132658 |
| C | 2.456175  | 0.844583  | 0.408238  |
| C | 2.667967  | 2.183598  | 0.792164  |
| C | 1.574029  | 3.247348  | 0.803860  |

|   |           |           |           |
|---|-----------|-----------|-----------|
| C | 1.262520  | 3.690912  | 2.245220  |
| C | 1.922404  | 4.458338  | -0.077085 |
| C | 3.940063  | 2.532374  | 1.247878  |
| C | 4.948317  | 1.588061  | 1.362430  |
| C | 4.693354  | 0.262817  | 1.046952  |
| C | 3.446564  | -0.144084 | 0.568334  |
| C | 3.208977  | -1.626497 | 0.310053  |
| C | 4.246828  | -2.236475 | -0.646018 |
| C | 3.172011  | -2.409481 | 1.635962  |
| C | 0.560586  | 0.933179  | -1.444548 |
| C | 1.225123  | 0.459152  | -2.768103 |
| C | 2.660859  | 1.002021  | -2.875793 |
| C | 0.397556  | 1.085160  | -3.911984 |
| C | 1.232233  | -1.066752 | -2.931611 |
| C | -0.924346 | 0.497203  | -1.277133 |
| C | -4.863229 | 0.595814  | -2.424982 |
| O | -3.980894 | 0.289380  | -1.342026 |
| H | -5.791816 | 2.189128  | -0.728994 |
| H | -5.988694 | 3.284630  | 1.450991  |
| H | -4.460613 | 2.656697  | 3.312047  |
| H | -2.756136 | 0.915314  | 2.940843  |
| H | -1.879652 | -0.728450 | 1.800747  |
| H | -3.656347 | -2.088766 | 0.689704  |
| H | -2.915692 | -1.774457 | -0.858609 |
| H | -1.274184 | -3.305974 | -1.639637 |
| H | 0.254415  | -5.199494 | -1.254473 |
| H | 0.651904  | -6.031733 | 1.047457  |
| H | -0.501392 | -4.950196 | 2.958084  |
| H | -2.031422 | -3.063470 | 2.574554  |
| H | 0.383698  | -0.323196 | 1.654568  |
| H | 0.654285  | 2.813604  | 0.413321  |
| H | 0.437752  | 4.406605  | 2.246828  |
| H | 0.977481  | 2.841558  | 2.869374  |
| H | 2.124896  | 4.173039  | 2.709075  |
| H | 2.803029  | 4.982377  | 0.298405  |
| H | 1.092939  | 5.168409  | -0.084602 |
| H | 2.126784  | 4.163549  | -1.107961 |
| H | 4.137244  | 3.556221  | 1.538307  |
| H | 5.927659  | 1.881409  | 1.719789  |
| H | 5.476335  | -0.472629 | 1.178266  |
| H | 2.230997  | -1.739295 | -0.155159 |
| H | 5.246369  | -2.235529 | -0.207839 |
| H | 3.985778  | -3.273758 | -0.865488 |
| H | 4.296079  | -1.693577 | -1.591158 |
| H | 2.942540  | -3.459821 | 1.446458  |
| H | 2.414182  | -2.017151 | 2.317344  |
| H | 4.135420  | -2.359901 | 2.147475  |
| H | 0.621047  | 2.021292  | -1.443688 |
| H | 3.070939  | 0.749871  | -3.855474 |
| H | 3.323844  | 0.583137  | -2.121005 |
| H | 2.682840  | 2.089670  | -2.778298 |
| H | -0.624887 | 0.703685  | -3.943733 |
| H | 0.354782  | 2.173620  | -3.826226 |
| H | 0.863104  | 0.846021  | -4.869192 |
| H | 0.227126  | -1.491373 | -2.934745 |
| H | 1.691441  | -1.326193 | -3.887106 |

|   |           |           |           |
|---|-----------|-----------|-----------|
| H | 1.804481  | -1.560405 | -2.148467 |
| H | -1.614829 | 1.328394  | -1.387895 |
| H | -1.212914 | -0.281538 | -1.978399 |
| H | -4.774785 | 1.642962  | -2.723396 |
| H | -5.899756 | 0.372344  | -2.164271 |
| H | -4.551250 | -0.042905 | -3.247124 |

B3LYP energy = -1507.78596434 a.u.

(5S,1'S)-**9a**, Conf. A

|   |           |           |           |
|---|-----------|-----------|-----------|
| C | -0.755867 | 0.093927  | -1.324629 |
| C | 0.580954  | -0.683381 | -1.506493 |
| N | 1.180968  | -0.573604 | -0.119939 |
| C | 0.374599  | 0.130601  | 0.652337  |
| N | -0.729635 | 0.538427  | 0.081079  |
| C | 0.416449  | -2.101501 | -2.125052 |
| C | 1.785102  | -2.780641 | -2.308471 |
| C | -0.192215 | -1.885356 | -3.528141 |
| C | -0.509916 | -3.015021 | -1.309254 |
| C | -1.851965 | 1.214702  | 0.775967  |
| C | 2.540335  | -0.907345 | 0.270523  |
| C | 2.757120  | -1.966846 | 1.174704  |
| C | 4.079214  | -2.291571 | 1.482851  |
| C | 5.142229  | -1.599325 | 0.924669  |
| C | 4.901267  | -0.527831 | 0.079411  |
| C | 3.601267  | -0.139675 | -0.248112 |
| C | 3.407329  | 1.122632  | -1.082434 |
| C | 3.967806  | 2.353962  | -0.347566 |
| C | 4.024820  | 0.999659  | -2.485084 |
| C | 1.636784  | -2.732487 | 1.868425  |
| C | 1.770371  | -4.255417 | 1.704793  |
| C | 1.562591  | -2.359759 | 3.361219  |
| C | -2.134359 | 2.605161  | 0.171788  |
| C | -3.069576 | 0.301607  | 0.840402  |
| C | -3.256034 | -0.497896 | 1.973675  |
| C | -4.354483 | -1.341939 | 2.051580  |
| C | -5.281905 | -1.412098 | 1.014673  |
| C | -5.099893 | -0.614539 | -0.115835 |
| C | -3.993607 | 0.239520  | -0.195826 |
| C | -0.990784 | 3.585396  | 0.304958  |
| C | -0.617215 | 4.076405  | 1.560316  |
| C | 0.422056  | 4.991536  | 1.687887  |
| C | 1.105978  | 5.435051  | 0.558543  |
| C | 0.740244  | 4.959487  | -0.695956 |
| C | -0.300482 | 4.041920  | -0.819495 |
| O | -5.935895 | -0.590821 | -1.187763 |
| C | -7.105241 | -1.412452 | -1.166033 |
| H | -0.819630 | 0.955775  | -1.986122 |
| H | -1.630081 | -0.532182 | -1.484888 |
| H | 1.234219  | -0.125508 | -2.175417 |
| H | 0.616230  | 0.363001  | 1.679694  |
| H | 2.267403  | -3.012644 | -1.360735 |
| H | 2.466890  | -2.156786 | -2.890463 |
| H | 1.653323  | -3.718606 | -2.850848 |
| H | 0.441320  | -1.240774 | -4.142171 |

|   |           |           |           |   |           |           |           |
|---|-----------|-----------|-----------|---|-----------|-----------|-----------|
| H | -1.191349 | -1.447106 | -3.490334 | C | 1.991040  | -2.436185 | 1.234175  |
| H | -0.279719 | -2.846386 | -4.036890 | C | 0.625666  | -3.028268 | 1.564156  |
| H | -0.111631 | -3.221888 | -0.317368 | C | 0.524662  | -4.519812 | 1.204562  |
| H | -1.513005 | -2.601156 | -1.191886 | C | 0.279031  | -2.809722 | 3.049076  |
| H | -0.617521 | -3.971771 | -1.823061 | C | 3.677559  | 0.636522  | -0.432142 |
| H | -1.494761 | 1.356772  | 1.795791  | C | 4.299854  | 1.666337  | 0.528358  |
| H | 4.278854  | -3.101631 | 2.172078  | C | 4.540075  | 0.487810  | -1.696913 |
| H | 6.159505  | -1.880919 | 1.166826  | C | -1.621793 | 3.107798  | -0.273419 |
| H | 5.738051  | 0.033075  | -0.316633 | C | -3.076879 | 0.989826  | -0.095789 |
| H | 2.339384  | 1.302250  | -1.203476 | C | -3.758393 | 1.211235  | -1.297391 |
| H | 3.755705  | 3.258837  | -0.920248 | C | -4.964957 | 0.564219  | -1.530268 |
| H | 3.518355  | 2.466851  | 0.640548  | C | -5.514593 | -0.302435 | -0.589217 |
| H | 5.049416  | 2.284615  | -0.219663 | C | -4.837687 | -0.522563 | 0.611650  |
| H | 3.823920  | 1.902486  | -3.065404 | C | -3.621447 | 0.126635  | 0.847655  |
| H | 3.622612  | 0.146687  | -3.034320 | C | -0.397992 | 3.832530  | 0.239625  |
| H | 5.107893  | 0.875677  | -2.430095 | C | 0.644393  | 4.183283  | -0.620003 |
| H | 0.690033  | -2.440813 | 1.415627  | C | 1.763144  | 4.864783  | -0.146735 |
| H | 0.897247  | -4.753868 | 2.130723  | C | 1.855380  | 5.204338  | 1.198635  |
| H | 1.847077  | -4.545850 | 0.656009  | C | 0.820787  | 4.862722  | 2.066385  |
| H | 2.651094  | -4.637835 | 2.223302  | C | -0.295764 | 4.184623  | 1.589489  |
| H | 0.722875  | -2.871385 | 3.836341  | O | -5.274190 | -1.338219 | 1.607756  |
| H | 1.433324  | -1.285466 | 3.509453  | C | -6.521981 | -2.015709 | 1.442649  |
| H | 2.474501  | -2.655582 | 3.883647  | H | -0.150957 | 1.378761  | -2.272600 |
| H | -3.014553 | 2.989605  | 0.691978  | H | -1.313611 | 0.056159  | -2.120274 |
| H | -2.417138 | 2.511390  | -0.877493 | H | 1.662197  | -0.085516 | -2.117290 |
| H | -2.551077 | -0.451208 | 2.794813  | H | 0.234569  | 0.238638  | 1.533837  |
| H | -4.501571 | -1.954061 | 2.932694  | H | 1.145596  | -0.851429 | -4.334662 |
| H | -6.131300 | -2.073837 | 1.101097  | H | -0.605043 | -0.788093 | -4.082278 |
| H | -3.898997 | 0.853131  | -1.082011 | H | 0.157484  | -2.291144 | -4.579143 |
| H | -1.155034 | 3.756386  | 2.446236  | H | -1.653172 | -2.004578 | -2.065577 |
| H | 0.690827  | 5.367504  | 2.667488  | H | -0.635476 | -2.942069 | -0.970664 |
| H | 1.911400  | 6.152172  | 0.656281  | H | -0.894352 | -3.486286 | -2.621588 |
| H | 1.258053  | 5.307974  | -1.581175 | H | 2.623617  | -2.262479 | -2.804686 |
| H | -0.590102 | 3.694560  | -1.805207 | H | 1.927852  | -3.160773 | -1.454957 |
| H | -7.617051 | -1.221023 | -2.105374 | H | 1.551281  | -3.625937 | -3.109767 |
| H | -6.844486 | -2.471843 | -1.103633 | H | -1.613352 | 1.650308  | 1.298224  |
| H | -7.760509 | -1.144741 | -0.333639 | H | 5.535528  | -0.932630 | 0.701906  |

B3LYP energy = -1507.78847808 a.u.

(5*S*,1'*S*)-**9a**, Conf. B

|   |           |           |           |   |           |           |           |
|---|-----------|-----------|-----------|---|-----------|-----------|-----------|
| C | -0.401179 | 0.481838  | -1.709309 | H | -0.127278 | -2.502898 | 0.978110  |
| C | 0.773225  | -0.539937 | -1.683088 | H | -0.491026 | -4.877489 | 1.385267  |
| N | 1.030150  | -0.663135 | -0.195156 | H | 0.765536  | -4.700813 | 0.156202  |
| C | 0.210965  | 0.140039  | 0.457870  | H | 1.199428  | -5.125618 | 1.811634  |
| N | -0.621927 | 0.817184  | -0.290401 | H | -0.726612 | -3.179859 | 3.259078  |
| C | 0.499918  | -1.843626 | -2.487359 | H | 0.317567  | -1.754026 | 3.325233  |
| C | 0.285218  | -1.406669 | -3.953272 | H | 0.975272  | -3.344336 | 3.698194  |
| C | -0.742588 | -2.602724 | -1.999351 | H | 2.712306  | 1.044471  | -0.731636 |
| C | 1.725333  | -2.773042 | -2.451373 | H | 4.369755  | 2.638740  | 0.037414  |
| C | -1.740021 | 1.650741  | 0.215601  | H | 3.697384  | 1.786068  | 1.430163  |
| C | 2.179532  | -1.285891 | 0.441905  | H | 5.306159  | 1.372773  | 0.831839  |
| C | 3.448176  | -0.697032 | 0.271177  | H | 4.647179  | 1.452886  | -2.196475 |
| C | 4.546261  | -1.352450 | 0.829855  | H | 4.104247  | -0.215931 | -2.408295 |
| C | 4.392856  | -2.513889 | 1.570129  | H | 5.541102  | 0.129282  | -1.449494 |
| C | 3.126059  | -3.031900 | 1.786974  | H | -2.524801 | 3.618890  | 0.067255  |
|   |           |           |           | H | -1.642231 | 3.144601  | -1.363324 |
|   |           |           |           | H | -3.365636 | 1.886362  | -2.045348 |

|   |           |           |           |
|---|-----------|-----------|-----------|
| H | -5.495118 | 0.737069  | -2.458572 |
| H | -6.457238 | -0.787111 | -0.797521 |
| H | -3.120863 | -0.052947 | 1.791830  |
| H | 0.574891  | 3.939994  | -1.674379 |
| H | 2.557237  | 5.136569  | -0.831345 |
| H | 2.721758  | 5.738551  | 1.568094  |
| H | 0.878240  | 5.135344  | 3.113076  |
| H | -1.103546 | 3.943684  | 2.272151  |
| H | -6.666525 | -2.592386 | 2.352315  |
| H | -7.344941 | -1.306219 | 1.327384  |
| H | -6.494716 | -2.691602 | 0.584367  |

B3LYP energy = -1507.78844475 a.u.

(5S,1'S)-**9a**, Conf. C

|   |           |           |           |
|---|-----------|-----------|-----------|
| C | -0.164523 | 0.242208  | 1.911806  |
| C | -1.697736 | 0.320505  | 1.664441  |
| N | -1.784876 | -0.136916 | 0.224189  |
| C | -0.586624 | -0.498933 | -0.199601 |
| N | 0.371678  | -0.373575 | 0.681872  |
| C | -2.561240 | -0.442971 | 2.710642  |
| C | -2.200011 | -1.932014 | 2.814756  |
| C | -4.057312 | -0.288535 | 2.388613  |
| C | -2.301239 | 0.240575  | 4.070439  |
| C | 1.802910  | -0.727792 | 0.555909  |
| C | -2.910626 | 0.032908  | -0.679038 |
| C | -3.279527 | 1.340543  | -1.052298 |
| C | -4.401211 | 1.488429  | -1.868951 |
| C | -5.102557 | 0.388350  | -2.336409 |
| C | -4.677066 | -0.890336 | -2.013039 |
| C | -3.575567 | -1.103448 | -1.182630 |
| C | -3.126962 | -2.536714 | -0.920628 |
| C | -4.254467 | -3.421932 | -0.364687 |
| C | -2.530170 | -3.163411 | -2.195061 |
| C | -2.487381 | 2.586675  | -0.670109 |
| C | -1.924419 | 3.285345  | -1.921500 |
| C | -3.314620 | 3.570229  | 0.174474  |
| C | 2.065009  | -1.561167 | -0.716624 |
| C | 2.664749  | 0.522400  | 0.661048  |
| C | 3.655930  | 0.602923  | 1.640875  |
| C | 4.457641  | 1.735076  | 1.715178  |
| C | 4.285294  | 2.797213  | 0.832437  |
| C | 3.289699  | 2.718322  | -0.144615 |
| C | 2.485031  | 1.578726  | -0.223961 |
| C | 3.463011  | -2.138255 | -0.757722 |
| C | 4.464507  | -1.541606 | -1.525021 |
| C | 5.748247  | -2.078442 | -1.559261 |
| C | 6.047481  | -3.221740 | -0.825102 |
| C | 5.055012  | -3.827250 | -0.059100 |
| C | 3.772595  | -3.289383 | -0.028418 |
| O | 3.025987  | 3.691691  | -1.058481 |
| C | 3.829889  | 4.873180  | -1.053037 |
| H | 0.288626  | 1.223529  | 2.047952  |
| H | 0.095383  | -0.378440 | 2.766132  |
| H | -2.021163 | 1.358696  | 1.690647  |
| H | -0.424258 | -0.858697 | -1.203742 |

|   |           |           |           |
|---|-----------|-----------|-----------|
| H | -1.158376 | -2.091903 | 3.101063  |
| H | -2.380613 | -2.464103 | 1.881649  |
| H | -2.816805 | -2.403080 | 3.581919  |
| H | -4.335102 | -0.771627 | 1.454060  |
| H | -4.342810 | 0.763503  | 2.322218  |
| H | -4.649695 | -0.741880 | 3.185426  |
| H | -1.265048 | 0.145061  | 4.399849  |
| H | -2.551300 | 1.303489  | 4.035035  |
| H | -2.928152 | -0.222217 | 4.834001  |
| H | 2.017759  | -1.358415 | 1.421661  |
| H | -4.716082 | 2.481390  | -2.162209 |
| H | -5.968542 | 0.527041  | -2.971638 |
| H | -5.209499 | -1.742160 | -2.415252 |
| H | -2.337172 | -2.518453 | -0.170633 |
| H | -3.862466 | -4.410849 | -0.118395 |
| H | -4.694296 | -2.998638 | 0.539418  |
| H | -5.055329 | -3.559242 | -1.093263 |
| H | -2.149529 | -4.164352 | -1.981392 |
| H | -1.709245 | -2.565958 | -2.597985 |
| H | -3.285128 | -3.252230 | -2.978709 |
| H | -1.625682 | 2.284322  | -0.076205 |
| H | -1.284687 | 4.120124  | -1.627881 |
| H | -1.330130 | 2.598919  | -2.527640 |
| H | -2.722547 | 3.682288  | -2.551203 |
| H | -4.168665 | 3.952035  | -0.387993 |
| H | -2.700828 | 4.425022  | 0.465817  |
| H | -3.699816 | 3.104114  | 1.083369  |
| H | 1.902923  | -0.943071 | -1.602061 |
| H | 1.344545  | -2.383022 | -0.747685 |
| H | 3.804757  | -0.215526 | 2.334192  |
| H | 5.230008  | 1.798115  | 2.471539  |
| H | 4.920284  | 3.667557  | 0.912781  |
| H | 1.726062  | 1.547228  | -0.996331 |
| H | 4.240340  | -0.651579 | -2.100988 |
| H | 6.512904  | -1.604553 | -2.162397 |
| H | 7.045202  | -3.641799 | -0.853424 |
| H | 5.276868  | -4.722865 | 0.508191  |
| H | 3.003618  | -3.777694 | 0.560473  |
| H | 3.451612  | 5.490905  | -1.863221 |
| H | 3.733292  | 5.413834  | -0.108313 |
| H | 4.880800  | 4.637017  | -1.236249 |

B3LYP energy = -1507.78784080 a.u.

(5S,1'S)-**9a**, Conf. D

|   |           |           |           |
|---|-----------|-----------|-----------|
| C | -0.115707 | 0.877720  | 1.523988  |
| C | -1.663040 | 0.958846  | 1.387816  |
| N | -1.901483 | 0.055797  | 0.195894  |
| C | -0.754201 | -0.465218 | -0.201863 |
| N | 0.289264  | -0.104023 | 0.498990  |
| C | -2.440682 | 0.647452  | 2.699870  |
| C | -2.119954 | -0.738961 | 3.277547  |
| C | -3.957077 | 0.780315  | 2.477242  |
| C | -2.018272 | 1.731477  | 3.715307  |
| C | 1.698742  | -0.526021 | 0.342584  |
| C | -3.119482 | -0.049745 | -0.589208 |

|   |           |           |           |                                                 |           |           |           |
|---|-----------|-----------|-----------|-------------------------------------------------|-----------|-----------|-----------|
| C | -3.535899 | 1.066811  | -1.340717 | H                                               | -3.699480 | 3.437959  | 0.135306  |
| C | -4.744183 | 0.967982  | -2.031449 | H                                               | 1.558490  | -1.481448 | -1.599983 |
| C | -5.486935 | -0.202036 | -2.021661 | H                                               | 1.088190  | -2.507807 | -0.243977 |
| C | -5.019694 | -1.310778 | -1.333775 | H                                               | 1.455105  | 1.016695  | -1.933426 |
| C | -3.830551 | -1.267033 | -0.604186 | H                                               | 2.888653  | 2.895899  | -2.622498 |
| C | -3.346390 | -2.539724 | 0.081024  | H                                               | 4.782974  | 3.613285  | -1.240358 |
| C | -4.408288 | -3.160685 | 1.002949  | H                                               | 3.847206  | 0.551257  | 1.614037  |
| C | -2.868345 | -3.570820 | -0.958602 | H                                               | 2.877001  | -3.416463 | 1.306402  |
| C | -2.715378 | 2.344033  | -1.490563 | H                                               | 5.128664  | -4.411041 | 1.371134  |
| C | -2.325376 | 2.580180  | -2.961283 | H                                               | 6.744559  | -3.956974 | -0.454593 |
| C | -3.438689 | 3.573350  | -0.915897 | H                                               | 6.081129  | -2.497784 | -2.345818 |
| C | 1.814049  | -1.760577 | -0.576090 | H                                               | 3.830607  | -1.494395 | -2.406237 |
| C | 2.551720  | 0.651939  | -0.103912 | H                                               | 7.063930  | 3.554770  | 1.588303  |
| C | 2.283004  | 1.319814  | -1.303974 | H                                               | 6.852898  | 3.294804  | -0.159000 |
| C | 3.091065  | 2.377046  | -1.693662 | H                                               | 5.799157  | 4.446740  | 0.710760  |
| C | 4.169429  | 2.787595  | -0.910656 | B3LYP energy = -1507.78768901 a.u.              |           |           |           |
| C | 4.437215  | 2.121042  | 0.284779  |                                                 |           |           |           |
| C | 3.619563  | 1.055593  | 0.682973  | (5 <i>S</i> ,1' <i>S</i> )- <b>9a</b> , Conf. E |           |           |           |
| C | 3.196539  | -2.374579 | -0.550710 |                                                 |           |           |           |
| C | 3.579476  | -3.202499 | 0.508078  | C                                               | 0.805519  | 0.010658  | 1.287208  |
| C | 4.849708  | -3.767827 | 0.545561  | C                                               | -0.638343 | -0.516192 | 1.530734  |
| C | 5.756310  | -3.514958 | -0.480359 | N                                               | -1.203949 | -0.494915 | 0.124119  |
| C | 5.383458  | -2.696033 | -1.541428 | C                                               | -0.331215 | 0.077790  | -0.683447 |
| C | 4.111971  | -2.130395 | -1.575277 | N                                               | 0.806077  | 0.415482  | -0.130912 |
| O | 5.455575  | 2.428626  | 1.130666  | C                                               | -0.705091 | -1.839513 | 2.344103  |
| C | 6.336898  | 3.498063  | 0.782566  | C                                               | -0.047733 | -1.532575 | 3.708135  |
| H | 0.372976  | 1.830885  | 1.325680  | C                                               | 0.043321  | -3.002154 | 1.677109  |
| H | 0.202077  | 0.524952  | 2.502666  | C                                               | -2.165637 | -2.245476 | 2.608686  |
| H | -1.951727 | 1.963496  | 1.086870  | C                                               | 1.995137  | 0.910048  | -0.868305 |
| H | -0.694593 | -1.131928 | -1.048919 | C                                               | -2.589358 | -0.708292 | -0.264613 |
| H | -1.057505 | -0.868804 | 3.494138  | C                                               | -2.921509 | -1.845210 | -1.028349 |
| H | -2.431521 | -1.541791 | 2.610844  | C                                               | -4.268802 | -2.044472 | -1.334844 |
| H | -2.654922 | -0.872747 | 4.219320  | C                                               | -5.244996 | -1.155773 | -0.912852 |
| H | -4.348397 | 0.024318  | 1.799243  | C                                               | -4.885118 | -0.015042 | -0.212710 |
| H | -4.215960 | 1.762195  | 2.075150  | C                                               | -3.552675 | 0.249837  | 0.106546  |
| H | -4.474594 | 0.669051  | 3.431782  | C                                               | -3.210875 | 1.585467  | 0.758136  |
| H | -0.959373 | 1.675456  | 3.973961  | C                                               | -3.554000 | 2.750125  | -0.189250 |
| H | -2.223614 | 2.734948  | 3.335053  | C                                               | -3.893284 | 1.772418  | 2.122929  |
| H | -2.584828 | 1.603489  | 4.638779  | C                                               | -1.893518 | -2.825388 | -1.580328 |
| H | 2.021515  | -0.820867 | 1.343402  | C                                               | -2.216331 | -4.286225 | -1.224649 |
| H | -5.096993 | 1.815401  | -2.604713 | C                                               | -1.751297 | -2.668623 | -3.106376 |
| H | -6.420129 | -0.256767 | -2.568299 | C                                               | 2.488712  | 2.251774  | -0.294978 |
| H | -5.589754 | -2.230188 | -1.363218 | C                                               | 3.057877  | -0.179666 | -0.957718 |
| H | -2.489557 | -2.288662 | 0.704741  | C                                               | 2.987296  | -1.091946 | -2.007480 |
| H | -3.984095 | -4.014454 | 1.535213  | C                                               | 3.931315  | -2.112558 | -2.108241 |
| H | -4.769352 | -2.445843 | 1.743711  | C                                               | 4.944289  | -2.229869 | -1.172410 |
| H | -5.269245 | -3.522350 | 0.438358  | C                                               | 5.026731  | -1.313015 | -0.119083 |
| H | -2.470161 | -4.455907 | -0.458144 | C                                               | 4.082425  | -0.289397 | -0.011388 |
| H | -2.087162 | -3.166392 | -1.606270 | C                                               | 1.485078  | 3.378057  | -0.403604 |
| H | -3.692460 | -3.889827 | -1.599575 | C                                               | 0.913293  | 3.942381  | 0.737887  |
| H | -1.779549 | 2.224103  | -0.945386 | C                                               | 0.005968  | 4.994640  | 0.637933  |
| H | -1.670609 | 3.450742  | -3.038289 | C                                               | -0.344378 | 5.497288  | -0.610273 |
| H | -1.797617 | 1.719392  | -3.376596 | C                                               | 0.221095  | 4.944923  | -1.757056 |
| H | -3.201781 | 2.767716  | -3.584111 | C                                               | 1.128822  | 3.896613  | -1.652950 |
| H | -4.362487 | 3.777935  | -1.460519 | O                                               | 6.059124  | -1.495898 | 0.746439  |
| H | -2.802765 | 4.457300  | -0.996524 | C                                               | 6.232739  | -0.575369 | 1.823285  |

|                                    |           |           |           |   |           |           |           |
|------------------------------------|-----------|-----------|-----------|---|-----------|-----------|-----------|
| H                                  | 1.042713  | 0.859628  | 1.923590  | C | -0.715949 | -1.003515 | 4.086064  |
| H                                  | 1.561023  | -0.759064 | 1.436129  | C | 0.325279  | -2.516080 | 2.375465  |
| H                                  | -1.201228 | 0.226140  | 2.096412  | C | 1.943692  | 1.436595  | -0.146968 |
| H                                  | -0.546822 | 0.262942  | -1.726387 | C | -2.193260 | -1.170834 | -0.465683 |
| H                                  | -0.542059 | -0.698782 | 4.212421  | C | -3.414607 | -0.468788 | -0.477761 |
| H                                  | 1.014227  | -1.296727 | 3.616514  | C | -4.506475 | -1.082715 | -1.093163 |
| H                                  | -0.130520 | -2.407272 | 4.354751  | C | -4.385593 | -2.316249 | -1.713144 |
| H                                  | 1.098258  | -2.781939 | 1.504721  | C | -3.155798 | -2.954251 | -1.749049 |
| H                                  | -0.402470 | -3.281717 | 0.725127  | C | -2.032192 | -2.402852 | -1.131072 |
| H                                  | 0.002138  | -3.877775 | 2.327144  | C | -0.697793 | -3.127473 | -1.256275 |
| H                                  | -2.718800 | -1.445198 | 3.105251  | C | -0.778224 | -4.600363 | -0.824563 |
| H                                  | -2.698235 | -2.508884 | 1.696690  | C | -0.147919 | -3.014159 | -2.690193 |
| H                                  | -2.185347 | -3.115888 | 3.266906  | C | -3.590770 | 0.940260  | 0.077902  |
| H                                  | 1.630377  | 1.094453  | -1.878761 | C | -3.966227 | 1.927313  | -1.042551 |
| H                                  | -4.557950 | -2.910026 | -1.916368 | C | -4.620222 | 0.996846  | 1.218777  |
| H                                  | -6.285217 | -1.340097 | -1.151112 | C | 1.964506  | 2.908147  | 0.310092  |
| H                                  | -5.650169 | 0.695628  | 0.071895  | C | 3.196823  | 0.651411  | 0.217849  |
| H                                  | -2.134423 | 1.631718  | 0.919980  | C | 3.794791  | 0.748359  | 1.471371  |
| H                                  | -3.235227 | 3.696986  | 0.250501  | C | 4.931085  | -0.010635 | 1.754850  |
| H                                  | -3.052711 | 2.639049  | -1.152602 | C | 5.476280  | -0.854339 | 0.803587  |
| H                                  | -4.628117 | 2.809505  | -0.374153 | C | 4.887143  | -0.948188 | -0.462340 |
| H                                  | -3.581483 | 2.718078  | 2.570930  | C | 3.746461  | -0.197550 | -0.749880 |
| H                                  | -3.640701 | 0.968957  | 2.817046  | C | 0.814679  | 3.736354  | -0.218032 |
| H                                  | -4.980123 | 1.795912  | 2.024599  | C | -0.150753 | 4.257808  | 0.644878  |
| H                                  | -0.925211 | -2.588925 | -1.141070 | C | -1.198973 | 5.036106  | 0.159208  |
| H                                  | -1.403334 | -4.937522 | -1.551922 | C | -1.295994 | 5.304221  | -1.201800 |
| H                                  | -2.349003 | -4.424020 | -0.150651 | C | -0.336619 | 4.793702  | -2.073041 |
| H                                  | -3.127572 | -4.626300 | -1.719401 | C | 0.709031  | 4.018564  | -1.583858 |
| H                                  | -0.966988 | -3.329966 | -3.480644 | O | 5.496613  | -1.787492 | -1.340730 |
| H                                  | -1.497863 | -1.645527 | -3.391832 | C | 4.973720  | -1.903542 | -2.663641 |
| H                                  | -2.680999 | -2.931234 | -3.615094 | H | 0.181708  | 1.505353  | 2.229724  |
| H                                  | 3.394385  | 2.507202  | -0.849650 | H | 1.196509  | 0.057694  | 2.266131  |
| H                                  | 2.790239  | 2.132467  | 0.746439  | H | -1.770684 | 0.246116  | 2.012929  |
| H                                  | 2.207653  | -1.005133 | -2.755063 | H | -0.051578 | 0.095457  | -1.501836 |
| H                                  | 3.879339  | -2.816091 | -2.929728 | H | -2.325184 | -2.849635 | 1.630321  |
| H                                  | 5.687590  | -3.013339 | -1.242686 | H | -3.037001 | -1.732322 | 2.796794  |
| H                                  | 4.155545  | 0.425811  | 0.794087  | H | -2.159542 | -3.153512 | 3.355791  |
| H                                  | 1.192638  | 3.572687  | 1.718227  | H | -1.537267 | -0.324345 | 4.327222  |
| H                                  | -0.419207 | 5.425485  | 1.536163  | H | 0.223940  | -0.467268 | 4.230104  |
| H                                  | -1.045679 | 6.318406  | -0.690288 | H | -0.737169 | -1.820535 | 4.808582  |
| H                                  | -0.035664 | 5.339216  | -2.732624 | H | 0.251956  | -2.978702 | 1.392951  |
| H                                  | 1.578499  | 3.492231  | -2.553367 | H | 1.291929  | -2.013288 | 2.442257  |
| H                                  | 7.117396  | -0.910521 | 2.357991  | H | 0.331962  | -3.319707 | 3.113853  |
| H                                  | 6.395564  | 0.440389  | 1.454268  | H | 1.850219  | 1.424152  | -1.232992 |
| H                                  | 5.374913  | -0.589295 | 2.500950  | H | -5.461696 | -0.574197 | -1.107332 |
| B3LYP energy = -1507.78726318 a.u. |           |           |           | H | -5.246135 | -2.770993 | -2.187954 |
| (5S,1'S)-9a, Conf. F               |           |           |           | H | -3.065197 | -3.899286 | -2.268118 |
| C                                  | 0.369525  | 0.544767  | 1.754713  | H | 0.019203  | -2.637368 | -0.599338 |
| C                                  | -0.907694 | -0.345059 | 1.709689  | H | 0.217966  | -5.047335 | -0.839911 |
| N                                  | -1.053379 | -0.584265 | 0.220612  | H | -1.179926 | -4.703792 | 0.184446  |
| C                                  | -0.113828 | 0.083817  | -0.422494 | H | -1.408815 | -5.184190 | -1.497199 |
| N                                  | 0.724870  | 0.741320  | 0.336577  | H | 0.833880  | -3.487711 | -2.756516 |
| C                                  | -0.856488 | -1.576562 | 2.658531  | H | -0.045104 | -1.972747 | -3.002676 |
| C                                  | -2.173450 | -2.370233 | 2.595839  | H | -0.808302 | -3.508538 | -3.405312 |
|                                    |           |           |           | H | -2.636290 | 1.281931  | 0.476500  |
|                                    |           |           |           | H | -4.008009 | 2.943560  | -0.646062 |

|   |           |           |           |
|---|-----------|-----------|-----------|
| H | -3.232982 | 1.909303  | -1.850955 |
| H | -4.943273 | 1.693848  | -1.469436 |
| H | -4.674206 | 2.008387  | 1.626351  |
| H | -4.364965 | 0.315986  | 2.032681  |
| H | -5.617868 | 0.729135  | 0.865580  |
| H | 2.913082  | 3.322360  | -0.038588 |
| H | 1.989675  | 2.964192  | 1.398885  |
| H | 3.401818  | 1.413715  | 2.228154  |
| H | 5.397428  | 0.065222  | 2.729119  |
| H | 6.361648  | -1.440563 | 1.012884  |
| H | 3.285192  | -0.254193 | -1.726687 |
| H | -0.073294 | 4.073775  | 1.710743  |
| H | -1.932893 | 5.439383  | 0.846177  |
| H | -2.106837 | 5.913411  | -1.581124 |
| H | -0.396265 | 5.010057  | -3.132656 |
| H | 1.460934  | 3.646807  | -2.271524 |
| H | 5.628022  | -2.601132 | -3.179528 |
| H | 3.955666  | -2.302040 | -2.655205 |
| H | 4.989289  | -0.941202 | -3.181566 |

B3LYP energy = -1507.78708226 a.u.

(5S,1'S)-**9a**, Conf. G

|   |           |           |           |
|---|-----------|-----------|-----------|
| C | -0.032249 | -0.360722 | -1.517590 |
| C | 1.507417  | -0.587588 | -1.460180 |
| N | 1.855617  | 0.058029  | -0.135125 |
| C | 0.761958  | 0.561867  | 0.407606  |
| N | -0.338007 | 0.372672  | -0.273758 |
| C | 1.942353  | -2.063338 | -1.691456 |
| C | 1.324993  | -3.043023 | -0.683029 |
| C | 3.475771  | -2.183853 | -1.665068 |
| C | 1.464814  | -2.430152 | -3.113379 |
| C | -1.700735 | 0.757060  | 0.176718  |
| C | 3.184633  | 0.415257  | 0.335233  |
| C | 3.886449  | 1.434016  | -0.338705 |
| C | 5.185728  | 1.714876  | 0.085910  |
| C | 5.750354  | 1.051474  | 1.163839  |
| C | 5.011561  | 0.105850  | 1.857497  |
| C | 3.715498  | -0.235022 | 1.466892  |
| C | 2.934286  | -1.233945 | 2.311780  |
| C | 3.693683  | -2.552304 | 2.531725  |
| C | 2.534586  | -0.609931 | 3.662149  |
| C | 3.282612  | 2.287085  | -1.449404 |
| C | 3.183976  | 3.760399  | -1.012340 |
| C | 4.052753  | 2.159597  | -2.773580 |
| C | -2.335300 | 1.739003  | -0.832520 |
| C | -2.523721 | -0.479959 | 0.504568  |
| C | -2.622653 | -0.889957 | 1.837981  |
| C | -3.341932 | -2.032486 | 2.159017  |
| C | -3.966664 | -2.789569 | 1.170955  |
| C | -3.870281 | -2.382613 | -0.160510 |
| C | -3.151183 | -1.227097 | -0.485200 |
| C | -3.549633 | 2.444592  | -0.269044 |
| C | -3.389058 | 3.516444  | 0.614366  |
| C | -4.493231 | 4.170488  | 1.150124  |
| C | -5.779687 | 3.763253  | 0.806454  |

|   |           |           |           |
|---|-----------|-----------|-----------|
| C | -5.951589 | 2.702192  | -0.076517 |
| C | -4.843983 | 2.048827  | -0.609951 |
| O | -4.437569 | -3.033276 | -1.211703 |
| C | -5.196394 | -4.217509 | -0.958253 |
| H | -0.331925 | 0.232075  | -2.379946 |
| H | -0.586668 | -1.295561 | -1.527947 |
| H | 1.994854  | 0.003559  | -2.234411 |
| H | 0.783262  | 1.104256  | 1.342444  |
| H | 0.233569  | -3.039146 | -0.703953 |
| H | 1.644360  | -2.835230 | 0.336717  |
| H | 1.644821  | -4.058292 | -0.924096 |
| H | 3.892940  | -1.981513 | -0.680470 |
| H | 3.940574  | -1.497614 | -2.376368 |
| H | 3.765690  | -3.197988 | -1.945853 |
| H | 0.377432  | -2.418023 | -3.207351 |
| H | 1.879894  | -1.750081 | -3.860735 |
| H | 1.800346  | -3.438507 | -3.359411 |
| H | -1.539549 | 1.298449  | 1.108975  |
| H | 5.756300  | 2.481622  | -0.422062 |
| H | 6.759574  | 1.287579  | 1.477596  |
| H | 5.448674  | -0.377805 | 2.721136  |
| H | 2.011736  | -1.477068 | 1.786788  |
| H | 3.056212  | -3.263878 | 3.060414  |
| H | 3.996921  | -3.007346 | 1.587708  |
| H | 4.590496  | -2.405167 | 3.135904  |
| H | 1.936551  | -1.316285 | 4.241778  |
| H | 1.947458  | 0.301412  | 3.529681  |
| H | 3.415783  | -0.351123 | 4.252374  |
| H | 2.260820  | 1.954896  | -1.630591 |
| H | 2.678697  | 4.347102  | -1.782428 |
| H | 2.621508  | 3.861121  | -0.082111 |
| H | 4.171395  | 4.197761  | -0.854649 |
| H | 3.560072  | 2.743074  | -3.554036 |
| H | 4.111255  | 1.122857  | -3.109544 |
| H | 5.073497  | 2.533384  | -2.675704 |
| H | -2.600528 | 1.219490  | -1.753900 |
| H | -1.574442 | 2.478595  | -1.091880 |
| H | -2.148781 | -0.309926 | 2.620604  |
| H | -3.425597 | -2.343183 | 3.192983  |
| H | -4.522459 | -3.673810 | 1.446785  |
| H | -3.118966 | -0.937301 | -1.527246 |
| H | -2.391340 | 3.852579  | 0.877037  |
| H | -4.349814 | 5.002854  | 1.828248  |
| H | -6.640856 | 4.273567  | 1.219579  |
| H | -6.948642 | 2.383123  | -0.354438 |
| H | -4.990594 | 1.225991  | -1.299210 |
| H | -5.546773 | -4.556313 | -1.929615 |
| H | -4.576639 | -4.994628 | -0.504117 |
| H | -6.054617 | -4.007527 | -0.315376 |

B3LYP energy = -1507.78700092 a.u.

(5S,1'S)-**9a**, Conf. H

|   |          |           |           |
|---|----------|-----------|-----------|
| C | 0.240826 | -2.279498 | -0.589420 |
| C | 1.747980 | -1.993094 | -0.327972 |
| N | 1.721119 | -0.506147 | -0.047499 |



|   |           |           |           |                                                 |           |           |           |
|---|-----------|-----------|-----------|-------------------------------------------------|-----------|-----------|-----------|
| C | 0.477585  | -0.064223 | -0.116262 | H                                               | 4.324490  | -1.665661 | -2.691996 |
| N | -0.421935 | -0.978195 | -0.374125 | H                                               | 4.965288  | -0.274716 | -3.562911 |
| C | 2.400938  | -2.918134 | 0.739166  | H                                               | 1.693048  | 0.192492  | 2.321054  |
| C | 2.286044  | -4.358598 | 0.194655  | H                                               | 2.739929  | 0.354981  | 4.516898  |
| C | 1.708391  | -2.836762 | 2.107388  | H                                               | 3.854248  | -0.466010 | 3.419805  |
| C | 3.897203  | -2.593431 | 0.888009  | H                                               | 4.124526  | 1.220540  | 3.859010  |
| C | -1.894565 | -0.807093 | -0.510352 | H                                               | 1.183805  | 2.177425  | 3.670012  |
| C | 2.864510  | 0.392332  | -0.056876 | H                                               | 1.145325  | 2.609364  | 1.956026  |
| C | 3.257114  | 1.030416  | 1.136480  | H                                               | 2.529888  | 3.061087  | 2.947407  |
| C | 4.393734  | 1.839827  | 1.090981  | H                                               | -2.437829 | -0.913536 | 1.589197  |
| C | 5.106595  | 2.019760  | -0.083761 | H                                               | -2.176218 | -2.469264 | 0.830338  |
| C | 4.666243  | 1.427414  | -1.256879 | H                                               | -2.439363 | 0.384048  | -2.880552 |
| C | 3.527538  | 0.621058  | -1.278990 | H                                               | -3.014268 | 2.746377  | -3.303265 |
| C | 3.028590  | 0.102223  | -2.623511 | H                                               | -3.173697 | 4.353982  | -1.456779 |
| C | 2.628463  | 1.270761  | -3.543044 | H                                               | -2.188299 | 1.256669  | 1.327866  |
| C | 4.048954  | -0.814768 | -3.317853 | H                                               | -3.869715 | -3.301838 | -0.916427 |
| C | 2.480302  | 0.935229  | 2.444163  | H                                               | -6.281199 | -3.577125 | -1.324210 |
| C | 3.355777  | 0.482516  | 3.624255  | H                                               | -7.914898 | -2.096085 | -0.188627 |
| C | 1.793159  | 2.275314  | 2.769092  | H                                               | -7.105518 | -0.337653 | 1.360440  |
| C | -2.619171 | -1.482985 | 0.677114  | H                                               | -4.691333 | -0.052600 | 1.758787  |
| C | -2.261388 | 0.646550  | -0.747676 | H                                               | -3.087476 | 5.490227  | 1.998299  |
| C | -2.496983 | 1.082857  | -2.055306 | H                                               | -2.357582 | 5.589869  | 0.379035  |
| C | -2.822349 | 2.411475  | -2.291584 | H                                               | -4.085400 | 5.170281  | 0.560637  |
| C | -2.914023 | 3.326716  | -1.246224 | B3LYP energy = -1507.78691571 a.u.              |           |           |           |
| C | -2.677843 | 2.894709  | 0.060012  |                                                 |           |           |           |
| C | -2.353821 | 1.555086  | 0.300817  | (5 <i>S</i> ,1' <i>S</i> )- <b>9a</b> , Conf. I |           |           |           |
| C | -4.104228 | -1.646504 | 0.441297  |                                                 |           |           |           |
| C | -4.573600 | -2.639055 | -0.424325 | C                                               | -0.108202 | 0.958437  | 1.456593  |
| C | -5.935855 | -2.799730 | -0.653637 | C                                               | -1.659931 | 0.979436  | 1.351968  |
| C | -6.853509 | -1.970110 | -0.014535 | N                                               | -1.890534 | 0.027155  | 0.197327  |
| C | -6.398575 | -0.983349 | 0.854034  | C                                               | -0.732074 | -0.453473 | -0.218935 |
| C | -5.033924 | -0.823241 | 1.078633  | N                                               | 0.313059  | -0.026583 | 0.441365  |
| O | -2.739309 | 3.689262  | 1.161116  | C                                               | -2.398330 | 0.686409  | 2.690419  |
| C | -3.089808 | 5.065719  | 0.998000  | C                                               | -1.983888 | 1.809660  | 3.665719  |
| H | 0.047994  | -2.615940 | -1.608253 | C                                               | -2.025797 | -0.673880 | 3.297884  |
| H | -0.161568 | -3.018444 | 0.098624  | C                                               | -3.921926 | 0.772603  | 2.497109  |
| H | 2.314366  | -2.130661 | -1.247271 | C                                               | 1.734741  | -0.394461 | 0.262715  |
| H | 0.226273  | 0.977731  | 0.010647  | C                                               | -3.118789 | -0.141370 | -0.561312 |
| H | 2.753086  | -4.452715 | -0.788684 | C                                               | -3.793873 | -1.378052 | -0.523353 |
| H | 1.251409  | -4.697126 | 0.114202  | C                                               | -4.990836 | -1.481681 | -1.234408 |
| H | 2.798173  | -5.043663 | 0.871843  | C                                               | -5.499897 | -0.411607 | -1.952886 |
| H | 0.649319  | -3.098131 | 2.058887  | C                                               | -4.793291 | 0.779375  | -2.012043 |
| H | 1.790964  | -1.844720 | 2.548885  | C                                               | -3.579253 | 0.936934  | -1.342853 |
| H | 2.179229  | -3.540466 | 2.795797  | C                                               | -2.800225 | 2.233279  | -1.540038 |
| H | 4.414795  | -2.659075 | -0.071570 | C                                               | -2.442011 | 2.444158  | -3.022343 |
| H | 4.071379  | -1.599570 | 1.295103  | C                                               | -3.549667 | 3.455226  | -0.982783 |
| H | 4.360582  | -3.315006 | 1.563208  | C                                               | -3.269857 | -2.610225 | 0.205585  |
| H | -2.148811 | -1.361075 | -1.416206 | C                                               | -4.295411 | -3.195685 | 1.190271  |
| H | 4.724038  | 2.340683  | 1.991628  | C                                               | -2.812484 | -3.688626 | -0.794619 |
| H | 5.992437  | 2.642673  | -0.090132 | C                                               | 1.883066  | -1.645950 | -0.628325 |
| H | 5.203686  | 1.613646  | -2.177846 | C                                               | 2.531432  | 0.804363  | -0.232428 |
| H | 2.121995  | -0.479383 | -2.460420 | C                                               | 2.199050  | 1.440088  | -1.425215 |
| H | 2.203312  | 0.887187  | -4.472954 | C                                               | 2.962273  | 2.520323  | -1.864878 |
| H | 1.884597  | 1.912642  | -3.067048 | C                                               | 4.048513  | 2.965801  | -1.129381 |
| H | 3.489967  | 1.889401  | -3.800399 | C                                               | 4.387791  | 2.327318  | 0.067537  |
| H | 3.633367  | -1.200850 | -4.250964 | C                                               | 3.622655  | 1.248095  | 0.516559  |

|                                    |           |           |           |   |           |           |           |
|------------------------------------|-----------|-----------|-----------|---|-----------|-----------|-----------|
| C                                  | 3.291185  | -2.198954 | -0.621173 | C | 0.141423  | -0.330014 | 1.778674  |
| C                                  | 3.728615  | -2.995247 | 0.440798  | C | 1.680732  | -0.152316 | 1.639262  |
| C                                  | 5.022741  | -3.504889 | 0.461516  | N | 1.845295  | -0.136637 | 0.132578  |
| C                                  | 5.898720  | -3.226676 | -0.584399 | C | 0.676486  | -0.377150 | -0.434156 |
| C                                  | 5.471516  | -2.438907 | -1.648677 | N | -0.329072 | -0.507963 | 0.391821  |
| C                                  | 4.176315  | -1.929324 | -1.665886 | C | 2.259006  | 1.035635  | 2.458647  |
| O                                  | 5.467670  | 2.826565  | 0.724746  | C | 1.652777  | 2.392375  | 2.072626  |
| C                                  | 5.887191  | 2.203066  | 1.939080  | C | 3.790260  | 1.089308  | 2.321273  |
| H                                  | 0.340296  | 1.925109  | 1.231493  | C | 1.925767  | 0.735461  | 3.936807  |
| H                                  | 0.242073  | 0.633760  | 2.434510  | C | -1.746316 | -0.701094 | -0.008951 |
| H                                  | -1.991201 | 1.962018  | 1.022538  | C | 3.092317  | -0.252976 | -0.607421 |
| H                                  | -0.665420 | -1.136124 | -1.052390 | C | 3.793005  | -1.474178 | -0.560955 |
| H                                  | -2.219007 | 2.796810  | 3.260925  | C | 5.015875  | -1.545308 | -1.229419 |
| H                                  | -0.919666 | 1.785416  | 3.906823  | C | 5.504760  | -0.468849 | -1.952582 |
| H                                  | -2.531080 | 1.695793  | 4.602619  | C | 4.762664  | 0.698308  | -2.040978 |
| H                                  | -0.954278 | -0.770139 | 3.485417  | C | 3.541852  | 0.837249  | -1.378320 |
| H                                  | -2.334310 | -1.502565 | 2.662625  | C | 2.745430  | 2.122013  | -1.572036 |
| H                                  | -2.529691 | -0.794450 | 4.258346  | C | 3.563043  | 3.381156  | -1.240694 |
| H                                  | -4.214650 | 1.732889  | 2.066881  | C | 2.183915  | 2.209471  | -3.003777 |
| H                                  | -4.307141 | -0.015636 | 1.853317  | C | 3.261692  | -2.732104 | 0.118857  |
| H                                  | -4.416667 | 0.681085  | 3.465671  | C | 3.002847  | -3.844947 | -0.913634 |
| H                                  | 2.089750  | -0.650734 | 1.263387  | C | 4.190500  | -3.227799 | 1.239154  |
| H                                  | -5.532769 | -2.418274 | -1.224160 | C | -2.279507 | -2.030970 | 0.568685  |
| H                                  | -6.437989 | -0.512456 | -2.484345 | C | -2.574553 | 0.531039  | 0.321984  |
| H                                  | -5.179744 | 1.596415  | -2.607472 | C | -3.031373 | 0.794799  | 1.618261  |
| H                                  | -1.853067 | 2.154321  | -1.007050 | C | -3.762759 | 1.947651  | 1.867475  |
| H                                  | -1.814164 | 3.330880  | -3.131771 | C | -4.059664 | 2.849470  | 0.848196  |
| H                                  | -1.896862 | 1.588943  | -3.426468 | C | -3.612518 | 2.584210  | -0.446647 |
| H                                  | -3.333922 | 2.591629  | -3.633977 | C | -2.868602 | 1.426108  | -0.698412 |
| H                                  | -2.942034 | 4.355150  | -1.097438 | C | -3.612035 | -2.434436 | -0.023954 |
| H                                  | -3.787585 | 3.339473  | 0.076259  | C | -3.680087 | -2.944009 | -1.324005 |
| H                                  | -4.488670 | 3.618213  | -1.515284 | C | -4.898723 | -3.316658 | -1.880808 |
| H                                  | -2.396277 | -2.317821 | 0.786755  | C | -6.072038 | -3.188733 | -1.141929 |
| H                                  | -3.845986 | -4.019298 | 1.748772  | C | -6.015964 | -2.688821 | 0.154834  |
| H                                  | -4.640496 | -2.449495 | 1.907176  | C | -4.794448 | -2.314359 | 0.707932  |
| H                                  | -5.169980 | -3.590394 | 0.670761  | O | -3.845192 | 3.379943  | -1.523970 |
| H                                  | -2.399636 | -4.546818 | -0.260243 | C | -4.616477 | 4.569538  | -1.344488 |
| H                                  | -2.047147 | -3.315278 | -1.478263 | H | -0.121699 | -1.198609 | 2.378867  |
| H                                  | -3.649171 | -4.042244 | -1.400130 | H | -0.339489 | 0.547151  | 2.205493  |
| H                                  | 1.592609  | -1.401826 | -1.651714 | H | 2.184817  | -1.050237 | 1.996031  |
| H                                  | 1.199107  | -2.415970 | -0.262171 | H | 0.566383  | -0.471640 | -1.505522 |
| H                                  | 1.358173  | 1.100517  | -2.018053 | H | 0.566511  | 2.415599  | 2.177344  |
| H                                  | 2.707961  | 3.017414  | -2.792764 | H | 1.898388  | 2.674012  | 1.050513  |
| H                                  | 4.648091  | 3.802226  | -1.464366 | H | 2.054103  | 3.165892  | 2.729658  |
| H                                  | 3.872392  | 0.742515  | 1.438694  | H | 4.109467  | 1.333040  | 1.309699  |
| H                                  | 3.049438  | -3.229451 | 1.253620  | H | 4.247609  | 0.137224  | 2.599304  |
| H                                  | 5.344020  | -4.125697 | 1.288882  | H | 4.188730  | 1.855206  | 2.989067  |
| H                                  | 6.905279  | -3.625906 | -0.572162 | H | 0.851640  | 0.741647  | 4.131829  |
| H                                  | 6.145060  | -2.222068 | -2.468650 | H | 2.325121  | -0.232548 | 4.248875  |
| H                                  | 3.852140  | -1.318172 | -2.499769 | H | 2.374724  | 1.500386  | 4.571943  |
| H                                  | 6.761011  | 2.758651  | 2.268772  | H | -1.714810 | -0.798261 | -1.094003 |
| H                                  | 5.109798  | 2.263205  | 2.705319  | H | 5.583132  | -2.466429 | -1.199911 |
| H                                  | 6.161996  | 1.158463  | 1.773365  | H | 6.454866  | -0.547080 | -2.466282 |
| B3LYP energy = -1507.78690449 a.u. |           |           |           | H | 5.136959  | 1.518388  | -2.639511 |
| (5S,1'S)-9a, Conf. J               |           |           |           | H | 1.892176  | 2.099417  | -0.895518 |

|   |           |           |           |
|---|-----------|-----------|-----------|
| H | 2.926611  | 4.265868  | -1.306914 |
| H | 3.982068  | 3.340604  | -0.234209 |
| H | 4.388679  | 3.518529  | -1.940953 |
| H | 1.571941  | 3.107289  | -3.113270 |
| H | 1.563674  | 1.345472  | -3.250844 |
| H | 2.988547  | 2.260148  | -3.739979 |
| H | 2.296081  | -2.506473 | 0.569713  |
| H | 2.560002  | -4.714801 | -0.423970 |
| H | 2.318632  | -3.508768 | -1.695505 |
| H | 3.928085  | -4.168067 | -1.393861 |
| H | 3.752476  | -4.096382 | 1.735155  |
| H | 4.362421  | -2.456807 | 1.992481  |
| H | 5.163385  | -3.527380 | 0.845024  |
| H | -2.365173 | -1.964266 | 1.653787  |
| H | -1.536139 | -2.803289 | 0.354763  |
| H | -2.835095 | 0.105527  | 2.428305  |
| H | -4.117803 | 2.151653  | 2.870000  |
| H | -4.637720 | 3.734605  | 1.070203  |
| H | -2.537770 | 1.242084  | -1.713494 |
| H | -2.771948 | -3.061516 | -1.905809 |
| H | -4.931713 | -3.713090 | -2.888260 |
| H | -7.021414 | -3.481493 | -1.572849 |
| H | -6.922717 | -2.591257 | 0.739153  |
| H | -4.762497 | -1.929508 | 1.720457  |
| H | -4.679158 | 5.030963  | -2.326380 |
| H | -5.622538 | 4.338192  | -0.986437 |
| H | -4.127288 | 5.257259  | -0.650228 |

B3LYP energy = -1507.78685743 a.u.

(5*S*,1'*S*)-**9a**, Conf. K

|   |           |           |           |
|---|-----------|-----------|-----------|
| C | -0.231564 | -1.815482 | 1.351283  |
| C | -1.757547 | -1.616376 | 1.118768  |
| N | -1.759467 | -0.424605 | 0.186359  |
| C | -0.515580 | -0.070520 | -0.083481 |
| N | 0.405807  | -0.814144 | 0.473286  |
| C | -2.511011 | -2.897882 | 0.657732  |
| C | -1.939835 | -3.500020 | -0.633954 |
| C | -4.010222 | -2.602756 | 0.481917  |
| C | -2.363761 | -3.921767 | 1.804498  |
| C | 1.883872  | -0.653875 | 0.392158  |
| C | -2.892099 | 0.431505  | -0.127745 |
| C | -3.434883 | 1.232182  | 0.896740  |
| C | -4.557511 | 2.002466  | 0.589715  |
| C | -5.093138 | 2.018606  | -0.688464 |
| C | -4.497380 | 1.277409  | -1.696679 |
| C | -3.386552 | 0.470029  | -1.446737 |
| C | -2.742458 | -0.270003 | -2.612985 |
| C | -3.744374 | -1.127068 | -3.402747 |
| C | -2.017204 | 0.714213  | -3.550419 |
| C | -2.824733 | 1.358463  | 2.288872  |
| C | -2.287913 | 2.782876  | 2.521882  |
| C | -3.806431 | 0.953466  | 3.400608  |
| C | 2.517255  | -1.873913 | -0.315996 |
| C | 2.257747  | 0.690897  | -0.204342 |
| C | 2.234074  | 0.923254  | -1.585216 |

|   |           |           |           |
|---|-----------|-----------|-----------|
| C | 2.566282  | 2.178979  | -2.074849 |
| C | 2.930595  | 3.215528  | -1.218569 |
| C | 2.958439  | 2.984877  | 0.157538  |
| C | 2.616130  | 1.721926  | 0.654538  |
| C | 4.018027  | -1.937948 | -0.135244 |
| C | 4.885973  | -1.637184 | -1.185960 |
| C | 6.265775  | -1.696564 | -1.009564 |
| C | 6.797801  | -2.056987 | 0.224055  |
| C | 5.941988  | -2.363297 | 1.278913  |
| C | 4.564324  | -2.306373 | 1.098003  |
| O | 3.300740  | 3.910531  | 1.090513  |
| C | 3.694109  | 5.213450  | 0.653365  |
| H | 0.062714  | -1.623912 | 2.383786  |
| H | 0.098748  | -2.814894 | 1.081242  |
| H | -2.230604 | -1.295089 | 2.044489  |
| H | -0.276975 | 0.779948  | -0.704498 |
| H | -0.882747 | -3.757279 | -0.543291 |
| H | -2.052884 | -2.829502 | -1.484553 |
| H | -2.473417 | -4.421513 | -0.872917 |
| H | -4.205304 | -1.913914 | -0.337352 |
| H | -4.440677 | -2.175254 | 1.390213  |
| H | -4.542243 | -3.531474 | 0.268205  |
| H | -1.328201 | -4.227563 | 1.964941  |
| H | -2.752204 | -3.525252 | 2.745612  |
| H | -2.932471 | -4.820880 | 1.563288  |
| H | 2.216670  | -0.661586 | 1.432124  |
| H | -5.005445 | 2.617982  | 1.359136  |
| H | -5.962703 | 2.626952  | -0.904144 |
| H | -4.901500 | 1.327501  | -2.699199 |
| H | -1.987832 | -0.944518 | -2.211420 |
| H | -3.220027 | -1.697989 | -4.171823 |
| H | -4.269673 | -1.832998 | -2.757933 |
| H | -4.492371 | -0.511557 | -3.904820 |
| H | -1.511961 | 0.170214  | -4.351326 |
| H | -1.269247 | 1.305452  | -3.017942 |
| H | -2.720843 | 1.410698  | -4.010767 |
| H | -1.962621 | 0.696210  | 2.356630  |
| H | -1.792584 | 2.841674  | 3.493424  |
| H | -1.565180 | 3.065433  | 1.753889  |
| H | -3.092952 | 3.519793  | 2.512776  |
| H | -3.311985 | 0.997638  | 4.373150  |
| H | -4.185725 | -0.060117 | 3.257565  |
| H | -4.665749 | 1.625624  | 3.437032  |
| H | 2.262252  | -1.855482 | -1.375659 |
| H | 2.072224  | -2.781792 | 0.096491  |
| H | 1.966603  | 0.136570  | -2.278473 |
| H | 2.550800  | 2.359593  | -3.142412 |
| H | 3.191817  | 4.180108  | -1.628895 |
| H | 2.650285  | 1.566471  | 1.725949  |
| H | 4.482695  | -1.356057 | -2.151590 |
| H | 6.923893  | -1.462471 | -1.837376 |
| H | 7.870847  | -2.103582 | 0.362415  |
| H | 6.347497  | -2.653815 | 2.240377  |
| H | 3.908540  | -2.561869 | 1.923661  |
| H | 3.932122  | 5.767787  | 1.557152  |
| H | 4.577807  | 5.163980  | 0.012803  |

H 2.881158 5.715063 0.122629  
B3LYP energy = -1507.78678165 a.u.

(5S,1'S)-9a, Conf. L

|   |           |           |           |
|---|-----------|-----------|-----------|
| C | 0.085475  | -1.310579 | -1.383220 |
| C | 1.357011  | -0.412575 | -1.406887 |
| N | 1.154594  | 0.420982  | -0.157180 |
| C | -0.031231 | 0.150984  | 0.360081  |
| N | -0.700606 | -0.796165 | -0.243789 |
| C | 2.690915  | -1.193923 | -1.571254 |
| C | 3.881165  | -0.222761 | -1.658757 |
| C | 2.586692  | -1.935393 | -2.922425 |
| C | 2.937303  | -2.217261 | -0.454904 |
| C | -2.069496 | -1.277053 | 0.099134  |
| C | 1.895239  | 1.617104  | 0.213022  |
| C | 1.748263  | 2.774814  | -0.576176 |
| C | 2.521540  | 3.887946  | -0.243345 |
| C | 3.368352  | 3.874237  | 0.853873  |
| C | 3.437519  | 2.748500  | 1.659465  |
| C | 2.705901  | 1.596912  | 1.364649  |
| C | 2.771742  | 0.419216  | 2.328815  |
| C | 4.211110  | -0.047249 | 2.601512  |
| C | 2.055901  | 0.757529  | 3.650191  |
| C | 0.749125  | 2.896662  | -1.721517 |
| C | -0.323128 | 3.953776  | -1.398668 |
| C | 1.428689  | 3.199190  | -3.066600 |
| C | -2.042654 | -2.476584 | 1.070185  |
| C | -2.939544 | -0.118524 | 0.567033  |
| C | -3.078304 | 0.217097  | 1.917903  |
| C | -3.872983 | 1.298659  | 2.277859  |
| C | -4.539844 | 2.056598  | 1.319821  |
| C | -4.406097 | 1.720330  | -0.029166 |
| C | -3.605141 | 0.634086  | -0.394521 |
| C | -1.415694 | -3.737358 | 0.516233  |
| C | -0.239089 | -4.251144 | 1.064661  |
| C | 0.328798  | -5.422435 | 0.568269  |
| C | -0.274917 | -6.097446 | -0.487095 |
| C | -1.453396 | -5.598954 | -1.038112 |
| C | -2.019056 | -4.431616 | -0.537884 |
| O | -5.010834 | 2.377141  | -1.053369 |
| C | -5.874413 | 3.475800  | -0.751570 |
| H | -0.500229 | -1.226031 | -2.297473 |
| H | 0.318117  | -2.359358 | -1.216286 |
| H | 1.300466  | 0.278616  | -2.247537 |
| H | -0.429685 | 0.694507  | 1.204537  |
| H | 4.044622  | 0.321186  | -0.730284 |
| H | 3.743417  | 0.507649  | -2.459062 |
| H | 4.790799  | -0.784401 | -1.878633 |
| H | 2.397959  | -1.242330 | -3.745639 |
| H | 1.800162  | -2.692170 | -2.924836 |
| H | 3.528213  | -2.446319 | -3.128071 |
| H | 3.060480  | -1.740574 | 0.515907  |
| H | 2.134710  | -2.951502 | -0.374222 |
| H | 3.855314  | -2.768210 | -0.666739 |
| H | -2.472384 | -1.621369 | -0.853328 |

|   |           |           |           |
|---|-----------|-----------|-----------|
| H | 2.441802  | 4.787022  | -0.840822 |
| H | 3.957453  | 4.750257  | 1.095092  |
| H | 4.070641  | 2.763944  | 2.536822  |
| H | 2.238472  | -0.416775 | 1.878224  |
| H | 4.200558  | -0.943794 | 3.224584  |
| H | 4.742833  | -0.284181 | 1.678887  |
| H | 4.786351  | 0.713344  | 3.132073  |
| H | 2.052823  | -0.111433 | 4.311725  |
| H | 1.020714  | 1.062480  | 3.484344  |
| H | 2.560055  | 1.573640  | 4.171417  |
| H | 0.220856  | 1.950239  | -1.826580 |
| H | -1.079204 | 3.972487  | -2.186177 |
| H | -0.822045 | 3.736339  | -0.452590 |
| H | 0.109898  | 4.953118  | -1.327735 |
| H | 0.684988  | 3.229760  | -3.865374 |
| H | 2.172299  | 2.443000  | -3.324440 |
| H | 1.933475  | 4.166604  | -3.046827 |
| H | -3.082871 | -2.677539 | 1.336967  |
| H | -1.531055 | -2.193614 | 1.991148  |
| H | -2.589043 | -0.360763 | 2.689853  |
| H | -3.984114 | 1.556246  | 3.323660  |
| H | -5.155328 | 2.888037  | 1.630624  |
| H | -3.526996 | 0.387147  | -1.446505 |
| H | 0.234005  | -3.736014 | 1.893179  |
| H | 1.239047  | -5.808307 | 1.010390  |
| H | 0.163077  | -7.009691 | -0.872263 |
| H | -1.937561 | -6.126070 | -1.850922 |
| H | -2.947146 | -4.066750 | -0.963994 |
| H | -6.243784 | 3.831095  | -1.709672 |
| H | -6.716444 | 3.157391  | -0.132603 |
| H | -5.331475 | 4.280749  | -0.250713 |

B3LYP energy = -1507.78639136 a.u.

(5S,1'S)-9a, Conf. M

|   |           |           |           |
|---|-----------|-----------|-----------|
| C | -0.126393 | 0.258825  | 1.923707  |
| C | -1.662110 | 0.281526  | 1.679015  |
| N | -1.734496 | -0.162508 | 0.233029  |
| C | -0.521381 | -0.453638 | -0.202901 |
| N | 0.435625  | -0.289193 | 0.673744  |
| C | -2.491357 | -0.525036 | 2.721056  |
| C | -2.243264 | 0.149375  | 4.087779  |
| C | -2.076985 | -2.001568 | 2.803064  |
| C | -3.995234 | -0.420980 | 2.415137  |
| C | 1.879340  | -0.593083 | 0.547722  |
| C | -2.880818 | -0.062763 | -0.654567 |
| C | -3.349360 | 1.218514  | -1.007089 |
| C | -4.496044 | 1.293689  | -1.798636 |
| C | -5.127145 | 0.150947  | -2.263911 |
| C | -4.604431 | -1.096898 | -1.964252 |
| C | -3.473498 | -1.238531 | -1.158416 |
| C | -2.919747 | -2.638801 | -0.921469 |
| C | -3.969724 | -3.605450 | -0.349981 |
| C | -2.311792 | -3.210565 | -2.216419 |
| C | -2.638219 | 2.514438  | -0.631750 |
| C | -2.143315 | 3.251626  | -1.889933 |

|   |           |           |           |
|---|-----------|-----------|-----------|
| C | -3.514652 | 3.439083  | 0.229244  |
| C | 2.179461  | -1.373080 | -0.749362 |
| C | 2.705048  | 0.674414  | 0.715090  |
| C | 3.651669  | 0.744212  | 1.729014  |
| C | 4.429152  | 1.894795  | 1.873714  |
| C | 4.263297  | 2.968139  | 1.018579  |
| C | 3.309841  | 2.902688  | -0.005764 |
| C | 2.530505  | 1.756514  | -0.155702 |
| C | 3.595095  | -1.905525 | -0.792212 |
| C | 3.940374  | -3.047432 | -0.064392 |
| C | 5.238683  | -3.545260 | -0.096287 |
| C | 6.211606  | -2.908425 | -0.862154 |
| C | 5.876914  | -1.774103 | -1.594669 |
| C | 4.577122  | -1.277260 | -1.558911 |
| O | 3.220607  | 4.004279  | -0.799230 |
| C | 2.307343  | 3.996795  | -1.894750 |
| H | 0.285257  | 1.251589  | 2.098431  |
| H | 0.158612  | -0.384274 | 2.753508  |
| H | -2.023495 | 1.307038  | 1.716680  |
| H | -0.346361 | -0.790530 | -1.212588 |
| H | -2.528028 | 1.203789  | 4.068510  |
| H | -1.202051 | 0.083439  | 4.408456  |
| H | -2.848642 | -0.343816 | 4.849638  |
| H | -2.666164 | -2.501918 | 3.573422  |
| H | -1.026657 | -2.128164 | 3.073241  |
| H | -2.252216 | -2.529744 | 1.866873  |
| H | -4.265719 | -0.901497 | 1.476980  |
| H | -4.561897 | -0.906313 | 3.211767  |
| H | -4.320210 | 0.620495  | 2.367424  |
| H | 2.104864  | -1.247964 | 1.392498  |
| H | -4.888350 | 2.264085  | -2.073921 |
| H | -6.014690 | 0.233655  | -2.878781 |
| H | -5.083936 | -1.981069 | -2.363386 |
| H | -2.115076 | -2.570263 | -0.190347 |
| H | -3.504375 | -4.566298 | -0.121057 |
| H | -4.418664 | -3.220607 | 0.566652  |
| H | -4.773653 | -3.792181 | -1.063759 |
| H | -1.861776 | -4.186655 | -2.023664 |
| H | -1.540483 | -2.556103 | -2.628609 |
| H | -3.076351 | -3.340119 | -2.984841 |
| H | -1.748367 | 2.269416  | -0.052985 |
| H | -1.572766 | 4.137843  | -1.603980 |
| H | -1.500858 | 2.613261  | -2.499506 |
| H | -2.975113 | 3.580817  | -2.515048 |
| H | -2.951427 | 4.328264  | 0.519656  |
| H | -3.858435 | 2.943537  | 1.138880  |
| H | -4.397537 | 3.771474  | -0.319802 |
| H | 2.006179  | -0.732470 | -1.616565 |
| H | 1.486500  | -2.216459 | -0.815188 |
| H | 3.792306  | -0.093171 | 2.400845  |
| H | 5.169416  | 1.948834  | 2.661999  |
| H | 4.859342  | 3.865877  | 1.119016  |
| H | 1.794740  | 1.701173  | -0.945804 |
| H | 3.187242  | -3.559433 | 0.525040  |
| H | 5.488673  | -4.433988 | 0.470126  |
| H | 7.221971  | -3.297011 | -0.891025 |

|   |          |           |           |
|---|----------|-----------|-----------|
| H | 6.626415 | -1.275570 | -2.196921 |
| H | 4.325597 | -0.393433 | -2.132985 |
| H | 2.544986 | 3.199890  | -2.604467 |
| H | 1.274825 | 3.888791  | -1.551859 |
| H | 2.423708 | 4.960351  | -2.383691 |

B3LYP energy = -1507.78625286 a.u.

(5S,1'S)-**9a**, Conf. N

|   |           |           |           |
|---|-----------|-----------|-----------|
| C | -0.467994 | 1.193278  | -1.711894 |
| C | -1.584777 | 0.132745  | -1.482278 |
| N | -1.075603 | -0.567506 | -0.237321 |
| C | 0.121819  | -0.099907 | 0.067963  |
| N | 0.549247  | 0.874816  | -0.691176 |
| C | -3.029095 | 0.708311  | -1.474709 |
| C | -4.062499 | -0.421872 | -1.325033 |
| C | -3.235157 | 1.355277  | -2.861958 |
| C | -3.258391 | 1.766323  | -0.387821 |
| C | 1.866283  | 1.565087  | -0.590373 |
| C | -1.585256 | -1.802265 | 0.336930  |
| C | -1.428256 | -3.002049 | -0.384727 |
| C | -1.981942 | -4.161313 | 0.160257  |
| C | -2.623709 | -4.145942 | 1.388557  |
| C | -2.701283 | -2.966755 | 2.112609  |
| C | -2.184524 | -1.770771 | 1.611565  |
| C | -2.234926 | -0.526283 | 2.488982  |
| C | -3.648658 | -0.221421 | 3.009746  |
| C | -1.244523 | -0.651927 | 3.662170  |
| C | -0.626790 | -3.118856 | -1.677674 |
| C | 0.627945  | -3.984775 | -1.459066 |
| C | -1.465035 | -3.658473 | -2.848181 |
| C | 1.904366  | 2.562398  | 0.583850  |
| C | 2.999757  | 0.547856  | -0.597081 |
| C | 3.470822  | 0.072631  | -1.826966 |
| C | 4.485449  | -0.872340 | -1.858975 |
| C | 5.050221  | -1.362288 | -0.682854 |
| C | 4.586320  | -0.886443 | 0.543582  |
| C | 3.562537  | 0.068885  | 0.579232  |
| C | 0.904693  | 3.691963  | 0.475600  |
| C | -0.186724 | 3.770549  | 1.342133  |
| C | -1.097697 | 4.820531  | 1.250186  |
| C | -0.929805 | 5.807233  | 0.284960  |
| C | 0.157162  | 5.741775  | -0.583967 |
| C | 1.067026  | 4.695090  | -0.486012 |
| O | 5.060912  | -1.279166 | 1.755277  |
| C | 6.130709  | -2.226065 | 1.800044  |
| H | -0.027694 | 1.119960  | -2.705256 |
| H | -0.818708 | 2.212609  | -1.560566 |
| H | -1.552583 | -0.605037 | -2.283658 |
| H | 0.710768  | -0.516837 | 0.872160  |
| H | -4.007195 | -0.911128 | -0.354258 |
| H | -3.934942 | -1.184503 | -2.096143 |
| H | -5.067669 | -0.010059 | -1.432613 |
| H | -3.073564 | 0.634451  | -3.667155 |
| H | -2.574313 | 2.208197  | -3.026637 |
| H | -4.260450 | 1.718879  | -2.943516 |

|                                    |           |           |           |   |           |           |           |
|------------------------------------|-----------|-----------|-----------|---|-----------|-----------|-----------|
| H                                  | -3.169491 | 1.348736  | 0.613357  | C | 3.095839  | -2.512034 | 2.942704  |
| H                                  | -2.568749 | 2.607456  | -0.465957 | C | 2.189992  | -0.257250 | 3.637910  |
| H                                  | -4.268342 | 2.168663  | -0.484441 | C | 2.532779  | 1.167220  | -2.106486 |
| H                                  | 1.933274  | 2.134465  | -1.516726 | C | 2.509294  | 2.705596  | -2.042136 |
| H                                  | -1.887832 | -5.096519 | -0.376183 | C | 3.184921  | 0.683171  | -3.411648 |
| H                                  | -3.043319 | -5.058902 | 1.792523  | C | -3.230509 | -0.243026 | 1.017300  |
| H                                  | -3.168239 | -2.974493 | 3.088719  | C | -2.084625 | 1.998724  | 0.538962  |
| H                                  | -1.918749 | 0.326978  | 1.889806  | C | -1.887682 | 2.315325  | 1.888122  |
| H                                  | -3.649405 | 0.725711  | 3.553020  | C | -1.660831 | 3.635088  | 2.256730  |
| H                                  | -4.372496 | -0.145667 | 2.196977  | C | -1.628863 | 4.654818  | 1.309200  |
| H                                  | -3.998815 | -0.992660 | 3.697757  | C | -1.829571 | 4.341644  | -0.036511 |
| H                                  | -1.232181 | 0.269202  | 4.248842  | C | -2.054666 | 3.012486  | -0.411294 |
| H                                  | -0.227717 | -0.849364 | 3.315484  | C | -3.769360 | -1.540734 | 0.455676  |
| H                                  | -1.528622 | -1.469445 | 4.327864  | C | -3.456470 | -2.761940 | 1.055320  |
| H                                  | -0.268828 | -2.129968 | -1.961598 | C | -3.969753 | -3.956719 | 0.555650  |
| H                                  | 1.231735  | -4.007313 | -2.368713 | C | -4.807234 | -3.945560 | -0.554538 |
| H                                  | 1.246136  | -3.590537 | -0.650421 | C | -5.135059 | -2.732555 | -1.156020 |
| H                                  | 0.362952  | -5.013477 | -1.208060 | C | -4.623374 | -1.541845 | -0.652238 |
| H                                  | -0.866340 | -3.675307 | -3.761171 | O | -1.828346 | 5.246496  | -1.049551 |
| H                                  | -2.347898 | -3.043983 | -3.032810 | C | -1.628691 | 6.627635  | -0.738582 |
| H                                  | -1.805408 | -4.677989 | -2.658228 | H | -1.251355 | -0.857217 | -2.164213 |
| H                                  | 2.917922  | 2.968604  | 0.614627  | H | -1.464354 | -2.060367 | -0.888770 |
| H                                  | 1.752615  | 2.029946  | 1.524201  | H | 1.077404  | -1.140618 | -2.158069 |
| H                                  | 3.051931  | 0.449599  | -2.752371 | H | 0.275421  | 0.973454  | 1.021797  |
| H                                  | 4.854533  | -1.233933 | -2.810728 | H | -0.590067 | -3.580479 | 0.271686  |
| H                                  | 5.843180  | -2.094071 | -0.734756 | H | 0.948758  | -3.233973 | 1.066771  |
| H                                  | 3.247544  | 0.425861  | 1.550861  | H | 0.737643  | -4.722735 | 0.158039  |
| H                                  | -0.321374 | 3.010791  | 2.104051  | H | 3.072683  | -2.761125 | -0.366197 |
| H                                  | -1.934707 | 4.868473  | 1.935937  | H | 2.935957  | -2.740228 | -2.125313 |
| H                                  | -1.634630 | 6.626316  | 0.214460  | H | 2.770549  | -4.256992 | -1.243091 |
| H                                  | 0.302594  | 6.513344  | -1.330096 | H | -0.718800 | -3.640627 | -2.311205 |
| H                                  | 1.919934  | 4.667698  | -1.155523 | H | 0.714287  | -3.235678 | -3.268018 |
| H                                  | 6.350330  | -2.372526 | 2.854164  | H | 0.653320  | -4.739004 | -2.347986 |
| H                                  | 5.834519  | -3.178789 | 1.354428  | H | -2.808683 | 0.626553  | -0.907564 |
| H                                  | 7.019074  | -1.842393 | 1.292833  | H | 5.103161  | 1.445141  | -1.379125 |
| B3LYP energy = -1507.78624517 a.u. |           |           |           | H | 6.236950  | 0.707328  | 0.673623  |
| (5S,1'S)-9a, Conf. O               |           |           |           | H | 4.981747  | -0.485148 | 2.417226  |
| C                                  | -0.879075 | -1.199075 | -1.199366 | H | 1.409409  | -1.511113 | 2.101797  |
| C                                  | 0.650094  | -1.491603 | -1.219264 | H | 2.482126  | -3.009864 | 3.696305  |
| N                                  | 1.146158  | -0.551463 | -0.141073 | H | 3.263001  | -3.214253 | 2.124759  |
| C                                  | 0.137679  | 0.176841  | 0.305417  | H | 4.062901  | -2.295138 | 3.399743  |
| N                                  | -1.030169 | -0.114769 | -0.205885 | H | 1.601944  | -0.736175 | 4.423872  |
| C                                  | 1.016720  | -2.998385 | -1.109411 | H | 1.667219  | 0.649231  | 3.326400  |
| C                                  | 0.493830  | -3.659023 | 0.173604  | H | 3.144803  | 0.046046  | 4.071915  |
| C                                  | 2.539733  | -3.190535 | -1.212518 | H | 1.491061  | 0.849293  | -2.121877 |
| C                                  | 0.371587  | -3.685155 | -2.332986 | H | 1.968037  | 3.108376  | -2.900868 |
| C                                  | -2.323869 | 0.572104  | 0.068392  | H | 2.015038  | 3.056248  | -1.134097 |
| C                                  | 2.529014  | -0.174164 | 0.106879  | H | 3.518110  | 3.121723  | -2.057704 |
| C                                  | 3.205826  | 0.586236  | -0.867242 | H | 2.642880  | 1.079240  | -4.272767 |
| C                                  | 4.552382  | 0.875211  | -0.641979 | H | 3.187656  | -0.405959 | -3.483463 |
| C                                  | 5.191469  | 0.470650  | 0.519595  | H | 4.219631  | 1.022590  | -3.488067 |
| C                                  | 4.483145  | -0.210329 | 1.497022  | H | -4.068087 | 0.410767  | 1.272573  |
| C                                  | 3.139615  | -0.545652 | 1.320682  | H | -2.694037 | -0.443370 | 1.945929  |
| C                                  | 2.397917  | -1.229765 | 2.461741  | H | -1.917526 | 1.547943  | 2.649817  |
|                                    |           |           |           | H | -1.511899 | 3.881618  | 3.300524  |
|                                    |           |           |           | H | -1.456632 | 5.672918  | 1.626394  |

|   |           |           |           |
|---|-----------|-----------|-----------|
| H | -2.216170 | 2.795843  | -1.460450 |
| H | -2.813118 | -2.779326 | 1.927613  |
| H | -3.718251 | -4.893541 | 1.037483  |
| H | -5.209840 | -4.872522 | -0.943432 |
| H | -5.797619 | -2.713365 | -2.012649 |
| H | -4.902950 | -0.604465 | -1.120260 |
| H | -1.679534 | 7.153077  | -1.688424 |
| H | -2.412008 | 6.999905  | -0.074159 |
| H | -0.649171 | 6.793234  | -0.283507 |

B3LYP energy = -1507.78623115 a.u.

(5S,1'S)-**9a**, Conf. P

|   |           |           |           |
|---|-----------|-----------|-----------|
| C | 0.840073  | 1.481728  | -1.173662 |
| C | -0.668450 | 1.808083  | -0.970629 |
| N | -1.120989 | 0.618064  | -0.150487 |
| C | -0.120659 | -0.236783 | -0.028208 |
| N | 1.012614  | 0.151116  | -0.553558 |
| C | -0.946272 | 3.235013  | -0.418142 |
| C | -0.283805 | 3.498073  | 0.940276  |
| C | -2.460391 | 3.488878  | -0.321388 |
| C | -0.369286 | 4.217493  | -1.460755 |
| C | 2.284297  | -0.624570 | -0.621653 |
| C | -2.494533 | 0.223977  | 0.124228  |
| C | -3.294681 | -0.226966 | -0.944194 |
| C | -4.625448 | -0.542968 | -0.667071 |
| C | -5.132327 | -0.463376 | 0.620608  |
| C | -4.304683 | -0.087805 | 1.666920  |
| C | -2.970281 | 0.259715  | 1.449621  |
| C | -2.095624 | 0.593221  | 2.651290  |
| C | -2.683398 | 1.718565  | 3.518435  |
| C | -1.835819 | -0.663501 | 3.503401  |
| C | -2.771571 | -0.458789 | -2.358173 |
| C | -2.809516 | -1.957189 | -2.712659 |
| C | -3.527883 | 0.371017  | -3.408708 |
| C | 3.294576  | -0.200350 | 0.467392  |
| C | 2.003497  | -2.119877 | -0.650685 |
| C | 1.815215  | -2.747302 | -1.887666 |
| C | 1.556194  | -4.109387 | -1.938577 |
| C | 1.476472  | -4.871213 | -0.774890 |
| C | 1.664045  | -4.248828 | 0.459782  |
| C | 1.928954  | -2.874874 | 0.514053  |
| C | 3.831462  | 1.208531  | 0.341066  |
| C | 3.572349  | 2.164058  | 1.325067  |
| C | 4.081252  | 3.456546  | 1.218852  |
| C | 4.861355  | 3.811283  | 0.123567  |
| C | 5.136145  | 2.863713  | -0.859908 |
| C | 4.628476  | 1.574004  | -0.749119 |
| O | 1.612461  | -4.881337 | 1.661253  |
| C | 1.365727  | -6.289187 | 1.687598  |
| H | 1.117856  | 1.430848  | -2.225430 |
| H | 1.491524  | 2.196630  | -0.678519 |
| H | -1.190178 | 1.742353  | -1.925069 |
| H | -0.240404 | -1.197449 | 0.451015  |
| H | 0.800703  | 3.385676  | 0.903861  |
| H | -0.668264 | 2.839353  | 1.716897  |

|   |           |           |           |
|---|-----------|-----------|-----------|
| H | -0.489524 | 4.523912  | 1.250876  |
| H | -2.944431 | 2.855531  | 0.419786  |
| H | -2.952800 | 3.321353  | -1.281721 |
| H | -2.636813 | 4.527692  | -0.036268 |
| H | 0.715925  | 4.141874  | -1.550895 |
| H | -0.807930 | 4.054728  | -2.448209 |
| H | -0.599262 | 5.240900  | -1.160700 |
| H | 2.700438  | -0.357042 | -1.594136 |
| H | -5.268911 | -0.879045 | -1.469840 |
| H | -6.167590 | -0.716984 | 0.812190  |
| H | -4.699773 | -0.068050 | 2.674270  |
| H | -1.129441 | 0.936042  | 2.283267  |
| H | -1.984681 | 1.978043  | 4.316432  |
| H | -2.880111 | 2.619230  | 2.934967  |
| H | -3.619885 | 1.414449  | 3.989080  |
| H | -1.158051 | -0.427837 | 4.326755  |
| H | -1.389109 | -1.467781 | 2.915381  |
| H | -2.763930 | -1.045885 | 3.932884  |
| H | -1.723588 | -0.164053 | -2.399698 |
| H | -2.374134 | -2.119535 | -3.701036 |
| H | -2.244892 | -2.551099 | -1.991184 |
| H | -3.832787 | -2.336504 | -2.732060 |
| H | -3.080582 | 0.227809  | -4.394471 |
| H | -3.505614 | 1.437355  | -3.176735 |
| H | -4.574680 | 0.068937  | -3.474393 |
| H | 4.125078  | -0.907418 | 0.401639  |
| H | 2.847697  | -0.332754 | 1.453864  |
| H | 1.885427  | -2.175199 | -2.804674 |
| H | 1.420709  | -4.595629 | -2.896594 |
| H | 1.278978  | -5.931035 | -0.842628 |
| H | 2.084443  | -2.433899 | 1.489768  |
| H | 2.974414  | 1.894523  | 2.188443  |
| H | 3.871719  | 4.182368  | 1.994998  |
| H | 5.260700  | 4.814340  | 0.040327  |
| H | 5.755535  | 3.126756  | -1.708627 |
| H | 4.868370  | 0.841955  | -1.512687 |
| H | 1.370799  | -6.569107 | 2.737583  |
| H | 0.392520  | -6.528267 | 1.251936  |
| H | 2.150700  | -6.837264 | 1.161236  |

B3LYP energy = -1507.78621087 a.u.

(5S,1'S)-**9a**, Conf. Q

|   |           |           |           |
|---|-----------|-----------|-----------|
| C | 0.149950  | -1.584497 | -1.509406 |
| C | 1.684480  | -1.443796 | -1.293041 |
| N | 1.732705  | -0.401141 | -0.198699 |
| C | 0.503242  | -0.056939 | 0.141771  |
| N | -0.446634 | -0.687319 | -0.500113 |
| C | 2.423620  | -2.790744 | -1.046516 |
| C | 2.206547  | -3.642809 | -2.316133 |
| C | 1.892042  | -3.555407 | 0.174577  |
| C | 3.936663  | -2.555764 | -0.895776 |
| C | -1.919703 | -0.515921 | -0.359381 |
| C | 2.892480  | 0.380660  | 0.197214  |
| C | 3.424414  | 0.223913  | 1.492360  |
| C | 4.566730  | 0.958825  | 1.814036  |

|   |           |           |           |                                                 |           |           |           |
|---|-----------|-----------|-----------|-------------------------------------------------|-----------|-----------|-----------|
| C | 5.156045  | 1.816167  | 0.898483  | H                                               | -2.142320 | -2.659782 | -0.298754 |
| C | 4.583165  | 1.992162  | -0.351134 | H                                               | -1.946802 | -0.017167 | 2.374931  |
| C | 3.429232  | 1.301707  | -0.724066 | H                                               | -2.459325 | 2.117912  | 3.487278  |
| C | 2.787434  | 1.632996  | -2.068196 | H                                               | -3.084178 | 4.111653  | 2.153796  |
| C | 2.350965  | 3.108565  | -2.119588 | H                                               | -2.650248 | 1.816050  | -1.441383 |
| C | 3.705678  | 1.294093  | -3.254065 | H                                               | -4.028609 | -2.253180 | -2.014885 |
| C | 2.787708  | -0.647265 | 2.568553  | H                                               | -6.477345 | -2.271453 | -2.259983 |
| C | 3.778333  | -1.643842 | 3.192078  | H                                               | -7.930563 | -1.866208 | -0.291354 |
| C | 2.142190  | 0.223951  | 3.662624  | H                                               | -6.903141 | -1.445402 | 1.925250  |
| C | -2.554599 | -1.797251 | 0.229373  | H                                               | -4.452608 | -1.414155 | 2.169366  |
| C | -2.254935 | 0.764122  | 0.385341  | H                                               | -3.704170 | 5.222019  | -2.070771 |
| C | -2.204271 | 0.845575  | 1.774879  | H                                               | -2.434520 | 3.992692  | -2.268130 |
| C | -2.496705 | 2.054462  | 2.407062  | H                                               | -4.146251 | 3.499342  | -2.113391 |
| C | -2.845985 | 3.172816  | 1.671000  | B3LYP energy = -1507.78612557 a.u.              |           |           |           |
| C | -2.906891 | 3.096205  | 0.275081  | (5 <i>S</i> ,1' <i>S</i> )- <b>9a</b> , Conf. R |           |           |           |
| C | -2.604868 | 1.892487  | -0.363995 |                                                 |           |           |           |
| C | -4.061474 | -1.817174 | 0.094080  |                                                 |           |           |           |
| C | -4.653228 | -2.061111 | -1.149011 | C                                               | -0.632280 | -0.208280 | 1.679686  |
| C | -6.036678 | -2.076134 | -1.289939 | C                                               | 0.837401  | -0.712768 | 1.702723  |
| C | -6.853023 | -1.851452 | -0.184544 | N                                               | 1.262084  | -0.450933 | 0.272684  |
| C | -6.275811 | -1.614790 | 1.058715  | C                                               | 0.258868  | 0.094176  | -0.393694 |
| C | -4.890417 | -1.597399 | 1.195353  | N                                               | -0.825681 | 0.299804  | 0.308408  |
| O | -3.268360 | 4.236688  | -0.367607 | C                                               | 1.709244  | -0.098438 | 2.835135  |
| C | -3.391005 | 4.219993  | -1.790353 | C                                               | 1.043039  | -0.504701 | 4.167428  |
| H | -0.164174 | -1.265545 | -2.503574 | C                                               | 1.798305  | 1.431680  | 2.756682  |
| H | -0.194870 | -2.602510 | -1.350290 | C                                               | 3.121933  | -0.707727 | 2.815551  |
| H | 2.140893  | -0.996745 | -2.174143 | C                                               | -2.148388 | 0.782933  | -0.139883 |
| H | 0.298093  | 0.702357  | 0.881465  | C                                               | 2.416394  | -1.033568 | -0.394079 |
| H | 2.564582  | -3.125362 | -3.209356 | C                                               | 3.469527  | -0.202231 | -0.823258 |
| H | 1.159701  | -3.909196 | -2.473779 | C                                               | 4.583917  | -0.817300 | -1.397027 |
| H | 2.766431  | -4.574833 | -2.226093 | C                                               | 4.652925  | -2.192950 | -1.548204 |
| H | 0.821776  | -3.762058 | 0.108867  | C                                               | 3.578675  | -2.983717 | -1.171771 |
| H | 2.077003  | -3.018997 | 1.104018  | C                                               | 2.428554  | -2.426621 | -0.611223 |
| H | 2.398654  | -4.519081 | 0.248523  | C                                               | 1.241254  | -3.342165 | -0.327125 |
| H | 4.345109  | -2.024683 | -1.758398 | C                                               | 0.739776  | -4.010583 | -1.620138 |
| H | 4.183420  | -1.985910 | -0.002156 | C                                               | 1.561522  | -4.401435 | 0.740948  |
| H | 4.448445  | -3.517528 | -0.828238 | C                                               | 3.432404  | 1.319548  | -0.755131 |
| H | -2.278599 | -0.408791 | -1.385358 | C                                               | 4.640450  | 1.910428  | -0.009826 |
| H | 5.000794  | 0.859041  | 2.800227  | C                                               | 3.327357  | 1.921225  | -2.169047 |
| H | 6.050011  | 2.365031  | 1.167374  | C                                               | -2.063417 | 1.822621  | -1.275943 |
| H | 5.026875  | 2.696436  | -1.042884 | C                                               | -3.068726 | -0.381261 | -0.489229 |
| H | 1.877527  | 1.043569  | -2.177711 | C                                               | -2.683497 | -1.364563 | -1.394504 |
| H | 1.830197  | 3.311592  | -3.057830 | C                                               | -3.575628 | -2.382468 | -1.730012 |
| H | 1.677587  | 3.353104  | -1.295861 | C                                               | -4.842368 | -2.424847 | -1.173354 |
| H | 3.207929  | 3.781925  | -2.062919 | C                                               | -5.235705 | -1.437627 | -0.263527 |
| H | 3.196496  | 1.502983  | -4.197148 | C                                               | -4.344102 | -0.419524 | 0.081630  |
| H | 4.000071  | 0.242899  | -3.252574 | C                                               | -1.369747 | 3.117537  | -0.908663 |
| H | 4.618368  | 1.892417  | -3.230944 | C                                               | -1.860984 | 3.920846  | 0.126296  |
| H | 1.990645  | -1.229522 | 2.108252  | C                                               | -1.245028 | 5.124664  | 0.448679  |
| H | 3.256618  | -2.294295 | 3.897026  | C                                               | -0.126417 | 5.551610  | -0.263338 |
| H | 4.249550  | -2.274027 | 2.436482  | C                                               | 0.364804  | 4.768087  | -1.301001 |
| H | 4.570241  | -1.132680 | 3.742273  | C                                               | -0.253499 | 3.560821  | -1.618990 |
| H | 1.628110  | -0.405972 | 4.391755  | O                                               | -6.494410 | -1.556763 | 0.234496  |
| H | 1.416976  | 0.927280  | 3.247724  | C                                               | -6.974131 | -0.571601 | 1.149832  |
| H | 2.896661  | 0.805723  | 4.195989  | H                                               | -1.351411 | -1.002692 | 1.877473  |
| H | -2.264604 | -1.901645 | 1.275211  | H                                               | -0.806411 | 0.602873  | 2.383877  |



|                                    |           |           |           |   |           |           |           |
|------------------------------------|-----------|-----------|-----------|---|-----------|-----------|-----------|
| H                                  | 0.855258  | -1.791456 | 1.845046  | C | -1.804529 | -0.586561 | 0.091222  |
| H                                  | 0.339709  | 0.329679  | -1.443653 | C | 3.030140  | -0.285617 | -0.629637 |
| H                                  | 0.939310  | -1.589457 | 4.247550  | C | 3.711649  | -1.518442 | -0.658631 |
| H                                  | 0.056129  | -0.056908 | 4.298897  | C | 4.909914  | -1.579732 | -1.371228 |
| H                                  | 1.663811  | -0.168694 | 4.999186  | C | 5.392305  | -0.481870 | -2.065790 |
| H                                  | 2.386767  | 1.805797  | 3.596278  | C | 4.667708  | 0.699403  | -2.079288 |
| H                                  | 0.819986  | 1.913139  | 2.813007  | C | 3.473172  | 0.829538  | -1.368876 |
| H                                  | 2.286253  | 1.764626  | 1.841971  | C | 2.697943  | 2.137249  | -1.478205 |
| H                                  | 3.085507  | -1.796781 | 2.890041  | C | 3.551718  | 3.362743  | -1.113076 |
| H                                  | 3.675702  | -0.451326 | 1.914740  | C | 2.097212  | 2.302603  | -2.887038 |
| H                                  | 3.689629  | -0.337083 | 3.670923  | C | 3.186167  | -2.797207 | -0.013910 |
| H                                  | -2.561919 | 1.283891  | 0.735762  | C | 2.889764  | -3.865723 | -1.081891 |
| H                                  | 5.411456  | -0.206155 | -1.732952 | C | 4.140727  | -3.343704 | 1.060116  |
| H                                  | 5.535002  | -2.647279 | -1.982055 | C | -2.387925 | -1.906715 | 0.642459  |
| H                                  | 3.625105  | -4.052670 | -1.335452 | C | -2.573991 | 0.669446  | 0.472204  |
| H                                  | 0.412347  | -2.738677 | 0.042391  | C | -2.951321 | 0.936184  | 1.785826  |
| H                                  | -0.157058 | -4.597826 | -1.412650 | C | -3.636861 | 2.114037  | 2.082935  |
| H                                  | 0.491680  | -3.269215 | -2.382016 | C | -3.956871 | 3.018798  | 1.085999  |
| H                                  | 1.488846  | -4.683733 | -2.040241 | C | -3.591358 | 2.752103  | -0.237733 |
| H                                  | 0.675862  | -5.004174 | 0.951751  | C | -2.894463 | 1.580829  | -0.539168 |
| H                                  | 1.895033  | -3.949096 | 1.676704  | C | -3.718749 | -2.259088 | 0.014139  |
| H                                  | 2.349618  | -5.076735 | 0.402498  | C | -3.766931 | -2.798193 | -1.275031 |
| H                                  | 2.536828  | 1.618588  | -0.211954 | C | -4.982780 | -3.122445 | -1.867295 |
| H                                  | 4.531205  | 2.993480  | 0.075499  | C | -6.173351 | -2.914734 | -1.175620 |
| H                                  | 4.736629  | 1.501152  | 0.996700  | C | -6.137389 | -2.383852 | 0.109559  |
| H                                  | 5.573691  | 1.714862  | -0.540900 | C | -4.918510 | -2.058841 | 0.698635  |
| H                                  | 3.236741  | 3.007413  | -2.109777 | O | -3.958958 | 3.685101  | -1.155293 |
| H                                  | 2.460006  | 1.536674  | -2.710022 | C | -3.650607 | 3.462951  | -2.531309 |
| H                                  | 4.214553  | 1.690626  | -2.761848 | H | -0.115819 | -1.331384 | 2.373424  |
| H                                  | -3.098720 | 2.029994  | -1.556647 | H | -0.289224 | 0.428337  | 2.360506  |
| H                                  | -1.606955 | 1.377981  | -2.162836 | H | 2.183838  | -1.189330 | 1.964429  |
| H                                  | -1.700879 | -1.350506 | -1.848370 | H | 0.469453  | -0.356711 | -1.456875 |
| H                                  | -3.277601 | -3.148177 | -2.435169 | H | 0.640812  | 2.290573  | 2.347798  |
| H                                  | -5.542547 | -3.209748 | -1.427932 | H | 1.946085  | 2.581359  | 1.196654  |
| H                                  | -4.632476 | 0.346337  | 0.788396  | H | 2.154892  | 2.992603  | 2.891407  |
| H                                  | -2.744930 | 3.616381  | 0.675810  | H | 4.136088  | 1.182424  | 1.323290  |
| H                                  | -1.644401 | 5.735431  | 1.249033  | H | 4.294159  | -0.057517 | 2.569137  |
| H                                  | 0.350725  | 6.491642  | -0.015974 | H | 4.273054  | 1.646761  | 3.015574  |
| H                                  | 1.226137  | 5.096756  | -1.869334 | H | 0.957369  | 0.533205  | 4.223494  |
| H                                  | 0.131730  | 2.969961  | -2.441912 | H | 2.415571  | -0.471031 | 4.248760  |
| H                                  | -6.376177 | -0.554876 | 2.064763  | H | 2.508021  | 1.245381  | 4.642781  |
| H                                  | -6.981686 | 0.422221  | 0.694725  | H | -1.799533 | -0.657371 | -0.996375 |
| H                                  | -7.992215 | -0.865047 | 1.391313  | H | 5.462184  | -2.510141 | -1.399438 |
| B3LYP energy = -1507.78595536 a.u. |           |           |           | H | 6.323045  | -0.553329 | -2.614701 |
| (5S,1'S)-9a, Conf. S               |           |           |           | H | 5.035314  | 1.538489  | -2.655171 |
| C                                  | 0.150474  | -0.419747 | 1.841414  | H | 1.865623  | 2.100191  | -0.776860 |
| C                                  | 1.689635  | -0.266048 | 1.664324  | H | 2.933700  | 4.262846  | -1.120747 |
| N                                  | 1.810482  | -0.180550 | 0.156171  | H | 3.996160  | 3.266432  | -0.121450 |
| C                                  | 0.615505  | -0.331724 | -0.386074 | H | 4.361513  | 3.514778  | -1.828565 |
| N                                  | -0.370811 | -0.468332 | 0.461836  | H | 1.501908  | 3.216781  | -2.937170 |
| C                                  | 2.316084  | 0.873931  | 2.517757  | H | 1.452516  | 1.463085  | -3.155963 |
| C                                  | 1.723287  | 2.256459  | 2.211033  | H | 2.881126  | 2.371488  | -3.643751 |
| C                                  | 3.843223  | 0.909256  | 2.335329  | H | 2.234831  | -2.581645 | 0.471134  |
| C                                  | 2.024170  | 0.516089  | 3.991630  | H | 2.441145  | -4.746339 | -0.617374 |
|                                    |           |           |           | H | 2.198641  | -3.489032 | -1.838262 |
|                                    |           |           |           | H | 3.800450  | -4.185388 | -1.591333 |

|   |           |           |           |
|---|-----------|-----------|-----------|
| H | 3.709701  | -4.228323 | 1.533386  |
| H | 4.339359  | -2.604416 | 1.838173  |
| H | 5.100192  | -3.633419 | 0.627594  |
| H | -2.495561 | -1.849888 | 1.726176  |
| H | -1.666428 | -2.700331 | 0.433117  |
| H | -2.733586 | 0.237410  | 2.582300  |
| H | -3.930575 | 2.321193  | 3.104375  |
| H | -4.497807 | 3.930049  | 1.305787  |
| H | -2.610450 | 1.361209  | -1.559107 |
| H | -2.845652 | -2.978033 | -1.819327 |
| H | -5.000507 | -3.544353 | -2.864752 |
| H | -7.120791 | -3.170435 | -1.633504 |
| H | -7.058023 | -2.224507 | 0.657395  |
| H | -4.902551 | -1.649590 | 1.701721  |
| H | -4.054274 | 4.318781  | -3.065714 |
| H | -2.570569 | 3.413163  | -2.693174 |
| H | -4.122398 | 2.549100  | -2.901188 |

B3LYP energy = -1507.78582265 a.u.

(5*S*,1'*R*)-**9b**, Conf. A

|   |           |           |           |
|---|-----------|-----------|-----------|
| C | -0.917431 | 0.353619  | -1.189894 |
| C | 0.464888  | 1.045344  | -1.371035 |
| N | 1.197751  | 0.584762  | -0.127608 |
| C | 0.367909  | -0.107173 | 0.633894  |
| N | -0.827916 | -0.288744 | 0.135613  |
| C | 1.127817  | 0.798377  | -2.755333 |
| C | 2.441772  | 1.590601  | -2.873621 |
| C | 0.145054  | 1.358449  | -3.807226 |
| C | 1.389000  | -0.685495 | -3.048944 |
| C | -1.925785 | -1.045848 | 0.785965  |
| C | 2.433815  | 1.147897  | 0.394826  |
| C | 2.414765  | 2.466744  | 0.890545  |
| C | 3.626213  | 3.017303  | 1.310851  |
| C | 4.799593  | 2.279806  | 1.284966  |
| C | 4.777536  | 0.959551  | 0.864171  |
| C | 3.600112  | 0.358658  | 0.415115  |
| C | 3.627246  | -1.116799 | 0.037574  |
| C | 4.703149  | -1.442957 | -1.010815 |
| C | 3.814260  | -1.995268 | 1.288960  |
| C | 1.141490  | 3.290545  | 1.057837  |
| C | 0.863762  | 3.570074  | 2.546610  |
| C | 1.177028  | 4.600781  | 0.254458  |
| C | -2.133076 | -2.431952 | 0.137888  |
| C | -3.182412 | -0.188657 | 0.852212  |
| C | -3.382135 | 0.630238  | 1.969110  |
| C | -4.518944 | 1.421386  | 2.051462  |
| C | -5.471623 | 1.418120  | 1.034911  |
| C | -5.274321 | 0.602696  | -0.080081 |
| C | -4.129757 | -0.198890 | -0.163880 |
| C | -0.977684 | -3.387457 | 0.332358  |
| C | -0.209973 | -3.819801 | -0.750336 |
| C | 0.838182  | -4.719491 | -0.569906 |
| C | 1.133874  | -5.200600 | 0.700799  |
| C | 0.372398  | -4.781282 | 1.789210  |

|   |           |           |           |
|---|-----------|-----------|-----------|
| C | -0.674608 | -3.885105 | 1.604679  |
| O | -6.130158 | 0.512362  | -1.132725 |
| C | -7.333070 | 1.283526  | -1.107468 |
| H | -1.742443 | 1.061979  | -1.199640 |
| H | -1.102246 | -0.403631 | -1.949016 |
| H | 0.345591  | 2.123975  | -1.275420 |
| H | 0.654844  | -0.479104 | 1.607341  |
| H | 3.205880  | 1.236260  | -2.184385 |
| H | 2.284286  | 2.654887  | -2.684791 |
| H | 2.836230  | 1.489910  | -3.886442 |
| H | -0.074374 | 2.413574  | -3.627074 |
| H | -0.799706 | 0.812114  | -3.832273 |
| H | 0.592114  | 1.277971  | -4.799111 |
| H | 2.104101  | -1.120576 | -2.353325 |
| H | 0.478474  | -1.285705 | -3.016432 |
| H | 1.804176  | -0.787986 | -4.052968 |
| H | -1.584336 | -1.201288 | 1.809381  |
| H | 3.647310  | 4.033544  | 1.682872  |
| H | 5.728471  | 2.727826  | 1.615559  |
| H | 5.692163  | 0.381684  | 0.886644  |
| H | 2.661104  | -1.375815 | -0.393089 |
| H | 4.623799  | -2.489530 | -1.311885 |
| H | 4.600321  | -0.825846 | -1.904644 |
| H | 5.708477  | -1.291729 | -0.613875 |
| H | 3.775060  | -3.051360 | 1.015419  |
| H | 3.037410  | -1.812499 | 2.034133  |
| H | 4.779719  | -1.805103 | 1.762415  |
| H | 0.296049  | 2.706440  | 0.695598  |
| H | -0.083933 | 4.101389  | 2.656790  |
| H | 0.804445  | 2.643638  | 3.121363  |
| H | 1.646509  | 4.188435  | 2.989399  |
| H | 0.227077  | 5.129453  | 0.355623  |
| H | 1.354293  | 4.420927  | -0.807362 |
| H | 1.965048  | 5.265178  | 0.613578  |
| H | -3.034552 | -2.849509 | 0.591909  |
| H | -2.346828 | -2.324084 | -0.926271 |
| H | -2.657315 | 0.637375  | 2.774275  |
| H | -4.677248 | 2.047977  | 2.920375  |
| H | -6.350755 | 2.039471  | 1.124568  |
| H | -4.021779 | -0.827002 | -1.038188 |
| H | -0.443161 | -3.466307 | -1.748143 |
| H | 1.416854  | -5.049186 | -1.424085 |
| H | 1.944922  | -5.903919 | 0.842597  |
| H | 0.586594  | -5.161935 | 2.780360  |
| H | -1.273617 | -3.585282 | 2.457914  |
| H | -7.853473 | 1.048057  | -2.031951 |
| H | -7.960898 | 1.008486  | -0.256543 |
| H | -7.116505 | 2.354173  | -1.074622 |

B3LYP energy = -1507.78830373 a.u.

(5*S*,1'*R*)-**9b**, Conf. B

|   |           |           |           |
|---|-----------|-----------|-----------|
| C | -0.657293 | 0.121247  | 1.673112  |
| C | 0.577223  | -0.827182 | 1.641752  |
| N | 1.062192  | -0.643634 | 0.217761  |
| C | 0.219825  | 0.144349  | -0.428511 |

|   |           |           |           |                                                 |           |           |           |
|---|-----------|-----------|-----------|-------------------------------------------------|-----------|-----------|-----------|
| N | -0.762298 | 0.622251  | 0.290092  | H                                               | 0.719192  | -5.418309 | -0.054663 |
| C | 1.587770  | -0.600294 | 2.800771  | H                                               | 2.906924  | 0.953852  | -0.122896 |
| C | 2.174068  | 0.818165  | 2.826666  | H                                               | 5.225503  | 1.628561  | 0.247624  |
| C | 2.723628  | -1.635564 | 2.731085  | H                                               | 4.955910  | 0.075181  | 1.043226  |
| C | 0.805041  | -0.849218 | 4.108813  | H                                               | 5.833544  | 0.146508  | -0.483946 |
| C | -1.834357 | 1.517987  | -0.207882 | H                                               | 4.012623  | 2.215777  | -1.908126 |
| C | 1.992050  | -1.510089 | -0.492580 | H                                               | 2.841595  | 1.100160  | -2.618525 |
| C | 3.248752  | -1.008227 | -0.882905 | H                                               | 4.562785  | 0.724586  | -2.677758 |
| C | 4.124961  | -1.887687 | -1.521957 | H                                               | -2.551711 | 3.510107  | 0.002156  |
| C | 3.772294  | -3.203693 | -1.775086 | H                                               | -1.612529 | 2.990607  | 1.382397  |
| C | 2.509647  | -3.658334 | -1.429062 | H                                               | -3.510238 | 1.913369  | 1.990873  |
| C | 1.584433  | -2.823091 | -0.801916 | H                                               | -5.689032 | 0.855845  | 2.395933  |
| C | 0.178635  | -3.359024 | -0.549716 | H                                               | -6.653722 | -0.718558 | 0.783401  |
| C | -0.529965 | -3.684891 | -1.877371 | H                                               | -3.222269 | -0.223121 | -1.737285 |
| C | 0.178718  | -4.578615 | 0.386358  | H                                               | 0.651018  | 3.724354  | 1.574567  |
| C | 3.676497  | 0.442328  | -0.699258 | H                                               | 2.618017  | 4.862255  | 0.625015  |
| C | 4.999004  | 0.574501  | 0.074271  | H                                               | 2.666472  | 5.471365  | -1.777840 |
| C | 3.776394  | 1.160496  | -2.058105 | H                                               | 0.719745  | 4.935466  | -3.218218 |
| C | -1.649808 | 2.966709  | 0.292209  | H                                               | -1.248225 | 3.805020  | -2.270304 |
| C | -3.198008 | 0.912047  | 0.097486  | H                                               | -7.496760 | -1.305649 | -1.348215 |
| C | -3.905101 | 1.215122  | 1.265470  | H                                               | -6.835418 | -2.671695 | -2.276543 |
| C | -5.138686 | 0.619464  | 1.493743  | H                                               | -6.727092 | -2.677960 | -0.500846 |
| C | -5.689656 | -0.275399 | 0.580468  | B3LYP energy = -1507.78815605 a.u.              |           |           |           |
| C | -4.986101 | -0.577922 | -0.586859 | (5 <i>S</i> ,1' <i>R</i> )- <b>9b</b> , Conf. C |           |           |           |
| C | -3.743163 | 0.019891  | -0.818569 | C                                               | -0.473214 | -0.425296 | -1.695296 |
| C | -0.433261 | 3.658665  | -0.280771 | C                                               | 0.678416  | 0.622868  | -1.687038 |
| C | 0.666378  | 3.972323  | 0.519666  | N                                               | 1.035261  | 0.664189  | -0.215207 |
| C | 1.778090  | 4.620074  | -0.014565 | C                                               | 0.191530  | -0.098292 | 0.457745  |
| C | 1.805478  | 4.963288  | -1.361765 | N                                               | -0.678540 | -0.747622 | -0.270789 |
| C | 0.712894  | 4.659742  | -2.170800 | C                                               | 1.812286  | 0.341288  | -2.713019 |
| C | -0.395878 | 4.015574  | -1.633343 | C                                               | 2.508380  | -1.008717 | -2.495199 |
| O | -5.420946 | -1.430047 | -1.552886 | C                                               | 2.852756  | 1.474444  | -2.685694 |
| C | -6.698891 | -2.050728 | -1.395255 | C                                               | 1.144028  | 0.348620  | -4.105666 |
| H | -1.573854 | -0.396884 | 1.946018  | C                                               | -1.764753 | -1.607805 | 0.259479  |
| H | -0.518134 | 0.957809  | 2.354629  | C                                               | 1.839740  | 1.679065  | 0.448516  |
| H | 0.242898  | -1.861065 | 1.723108  | C                                               | 1.329672  | 2.989902  | 0.536396  |
| H | 0.324610  | 0.359674  | -1.482754 | C                                               | 2.144387  | 3.962536  | 1.117486  |
| H | 1.406635  | 1.585405  | 2.940716  | C                                               | 3.391201  | 3.643918  | 1.632761  |
| H | 2.745521  | 1.042606  | 1.927770  | C                                               | 3.837921  | 2.332282  | 1.601243  |
| H | 2.850175  | 0.915129  | 3.677855  | C                                               | 3.077160  | 1.318655  | 1.015770  |
| H | 3.346069  | -1.511535 | 1.847249  | C                                               | 3.590730  | -0.114358 | 1.079147  |
| H | 2.330726  | -2.654740 | 2.726795  | C                                               | 5.007611  | -0.263450 | 0.502010  |
| H | 3.365642  | -1.532377 | 3.607791  | C                                               | 3.540362  | -0.647802 | 2.523429  |
| H | 0.003721  | -0.124119 | 4.262691  | C                                               | -0.078178 | 3.383341  | 0.099859  |
| H | 0.368512  | -1.850641 | 4.128104  | C                                               | -0.923658 | 3.815829  | 1.312061  |
| H | 1.484476  | -0.767433 | 4.958386  | C                                               | -0.075187 | 4.475661  | -0.982164 |
| H | -1.709720 | 1.520847  | -1.290834 | C                                               | -1.610509 | -3.072668 | -0.191190 |
| H | 5.099377  | -1.532340 | -1.830633 | C                                               | -3.121024 | -0.990475 | -0.058922 |
| H | 4.473943  | -3.869174 | -2.262483 | C                                               | -3.820475 | -1.282225 | -1.234634 |
| H | 2.227259  | -4.675316 | -1.668765 | C                                               | -5.046194 | -0.673486 | -1.471588 |
| H | -0.415453 | -2.581614 | -0.070710 | C                                               | -5.597235 | 0.222883  | -0.559801 |
| H | -1.559658 | -3.993985 | -1.686369 | C                                               | -4.901990 | 0.513459  | 0.615467  |
| H | -0.552826 | -2.816150 | -2.538491 | C                                               | -3.666727 | -0.096617 | 0.855254  |
| H | -0.030358 | -4.496927 | -2.408586 | C                                               | -0.358739 | -3.752428 | 0.319154  |
| H | -0.845082 | -4.906433 | 0.577816  |                                                 |           |           |           |
| H | 0.647829  | -4.350486 | 1.345217  |                                                 |           |           |           |

|                                    |           |           |           |   |           |           |           |
|------------------------------------|-----------|-----------|-----------|---|-----------|-----------|-----------|
| C                                  | 0.592990  | -4.256306 | -0.568789 | C | 0.196593  | 0.046412  | 1.984587  |
| C                                  | 1.737271  | -4.899975 | -0.103313 | C | 1.703392  | 0.276549  | 1.675245  |
| C                                  | 1.946349  | -5.049003 | 1.263309  | N | 1.775942  | -0.150124 | 0.224099  |
| C                                  | 1.000255  | -4.558452 | 2.160314  | C | 0.591633  | -0.586989 | -0.167572 |
| C                                  | -0.142155 | -3.919327 | 1.691228  | N | -0.350677 | -0.520399 | 0.736831  |
| O                                  | -5.337511 | 1.364853  | 1.581726  | C | 2.225340  | 1.694027  | 2.047685  |
| C                                  | -6.609287 | 1.996423  | 1.417551  | C | 3.737417  | 1.799583  | 1.784901  |
| H                                  | -1.393081 | -0.028845 | -2.119865 | C | 1.999656  | 1.850853  | 3.567793  |
| H                                  | -0.201548 | -1.329917 | -2.235418 | C | 1.488834  | 2.820990  | 1.309763  |
| H                                  | 0.277165  | 1.604844  | -1.934587 | C | -1.785575 | -0.858563 | 0.608414  |
| H                                  | 0.209213  | -0.161195 | 1.536784  | C | 2.982504  | -0.421135 | -0.540807 |
| H                                  | 1.817929  | -1.851797 | -2.550193 | C | 3.777674  | -1.525623 | -0.176311 |
| H                                  | 3.019937  | -1.055118 | -1.535637 | C | 4.965646  | -1.727288 | -0.880184 |
| H                                  | 3.258439  | -1.158047 | -3.273744 | C | 5.328793  | -0.901149 | -1.932172 |
| H                                  | 3.395769  | 1.519510  | -1.743489 | C | 4.490934  | 0.132208  | -2.320651 |
| H                                  | 2.385595  | 2.447433  | -2.852527 | C | 3.299255  | 0.396628  | -1.643255 |
| H                                  | 3.582778  | 1.317105  | -3.481772 | C | 2.386229  | 1.498093  | -2.167519 |
| H                                  | 0.429230  | -0.466990 | -4.231326 | C | 3.104581  | 2.849561  | -2.311358 |
| H                                  | 0.624094  | 1.290664  | -4.295452 | C | 1.748752  | 1.082127  | -3.506759 |
| H                                  | 1.908603  | 0.231433  | -4.875037 | C | 3.380986  | -2.544415 | 0.888044  |
| H                                  | -1.635246 | -1.574531 | 1.340878  | C | 3.177254  | -3.936797 | 0.263109  |
| H                                  | 1.787434  | 4.981954  | 1.187133  | C | 4.391096  | -2.606908 | 2.045160  |
| H                                  | 4.005561  | 4.415085  | 2.080689  | C | -2.050138 | -1.702563 | -0.656923 |
| H                                  | 4.794744  | 2.087625  | 2.043711  | C | -2.641245 | 0.396703  | 0.702359  |
| H                                  | 2.927239  | -0.740453 | 0.484317  | C | -3.636567 | 0.486655  | 1.677388  |
| H                                  | 5.299084  | -1.315706 | 0.498638  | C | -4.435459 | 1.621383  | 1.740532  |
| H                                  | 5.069997  | 0.107061  | -0.522232 | C | -4.256672 | 2.676880  | 0.851086  |
| H                                  | 5.743207  | 0.278893  | 1.098637  | C | -3.256707 | 2.588950  | -0.120607 |
| H                                  | 3.854292  | -1.693222 | 2.549185  | C | -2.454130 | 1.447009  | -0.187896 |
| H                                  | 2.534402  | -0.587496 | 2.944116  | C | -3.445155 | -2.287543 | -0.686127 |
| H                                  | 4.206819  | -0.079431 | 3.175406  | C | -3.741103 | -3.440446 | 0.046118  |
| H                                  | -0.574150 | 2.508744  | -0.319977 | C | -5.020469 | -3.985979 | 0.027673  |
| H                                  | -1.947768 | 4.027787  | 0.998053  | C | -6.023737 | -3.386327 | -0.728803 |
| H                                  | -0.956466 | 3.033690  | 2.073237  | C | -5.738218 | -2.241308 | -1.465753 |
| H                                  | -0.522930 | 4.718652  | 1.776333  | C | -4.457389 | -1.696848 | -1.443874 |
| H                                  | -1.096323 | 4.685020  | -1.307263 | O | -2.986581 | 3.554967  | -1.040183 |
| H                                  | 0.505889  | 4.178891  | -1.857402 | C | -3.786343 | 4.739311  | -1.045179 |
| H                                  | 0.348813  | 5.407552  | -0.603937 | H | 0.037968  | -0.656504 | 2.801736  |
| H                                  | -2.494655 | -3.599642 | 0.175719  | H | -0.330407 | 0.970266  | 2.214367  |
| H                                  | -1.645766 | -3.139936 | -1.279332 | H | 2.304764  | -0.434857 | 2.239387  |
| H                                  | -3.427629 | -1.982823 | -1.958899 | H | 0.432879  | -0.982966 | -1.158983 |
| H                                  | -5.590454 | -0.900857 | -2.379765 | H | 3.984660  | 1.719676  | 0.727812  |
| H                                  | -6.555218 | 0.675886  | -0.769725 | H | 4.290150  | 1.024643  | 2.320732  |
| H                                  | -3.151443 | 0.138412  | 1.779183  | H | 4.100144  | 2.766691  | 2.137714  |
| H                                  | 0.431875  | -4.163323 | -1.636866 | H | 2.494112  | 1.055813  | 4.131203  |
| H                                  | 2.460384  | -5.288733 | -0.809777 | H | 0.941790  | 1.852390  | 3.837020  |
| H                                  | 2.833293  | -5.551876 | 1.627976  | H | 2.419089  | 2.801747  | 3.899558  |
| H                                  | 1.146839  | -4.683980 | 3.226102  | H | 1.660409  | 2.785510  | 0.235529  |
| H                                  | -0.879392 | -3.564356 | 2.403179  | H | 0.411125  | 2.803584  | 1.481637  |
| H                                  | -6.747637 | 2.613818  | 2.301073  | H | 1.854324  | 3.785607  | 1.666251  |
| H                                  | -6.625654 | 2.628581  | 0.526347  | H | -2.005419 | -1.479017 | 1.479482  |
| H                                  | -7.412556 | 1.257890  | 1.360504  | H | 5.605884  | -2.558817 | -0.615268 |
| B3LYP energy = -1507.78799422 a.u. |           |           |           | H | 6.254623  | -1.077529 | -2.465468 |
| (5S,1'R)-9b, Conf. D               |           |           |           | H | 4.765590  | 0.744036  | -3.169895 |
|                                    |           |           |           | H | 1.573526  | 1.636452  | -1.454986 |
|                                    |           |           |           | H | 2.390035  | 3.620233  | -2.607500 |

|   |           |           |           |
|---|-----------|-----------|-----------|
| H | 3.570893  | 3.162468  | -1.376018 |
| H | 3.882116  | 2.811987  | -3.076371 |
| H | 1.040865  | 1.843674  | -3.840619 |
| H | 1.214235  | 0.133230  | -3.423774 |
| H | 2.506784  | 0.964576  | -4.283609 |
| H | 2.417124  | -2.257942 | 1.308180  |
| H | 2.824967  | -4.639333 | 1.021430  |
| H | 2.440692  | -3.906510 | -0.542132 |
| H | 4.107723  | -4.331004 | -0.149055 |
| H | 4.045422  | -3.305603 | 2.809676  |
| H | 4.530481  | -1.631401 | 2.513975  |
| H | 5.368268  | -2.949736 | 1.700296  |
| H | -1.896216 | -1.090082 | -1.547838 |
| H | -1.324909 | -2.520320 | -0.684945 |
| H | -3.791019 | -0.326876 | 2.375266  |
| H | -5.211084 | 1.691510  | 2.492938  |
| H | -4.890127 | 3.549115  | 0.922455  |
| H | -1.690354 | 1.410034  | -0.955133 |
| H | -2.963612 | -3.924034 | 0.627685  |
| H | -5.231505 | -4.882884 | 0.597052  |
| H | -7.019184 | -3.812256 | -0.747652 |
| H | -6.511428 | -1.772054 | -2.061556 |
| H | -4.244064 | -0.805599 | -2.022115 |
| H | -4.837252 | 4.505693  | -1.231761 |
| H | -3.691970 | 5.285048  | -0.103196 |
| H | -3.402272 | 5.351015  | -1.857202 |

B3LYP energy = -1507.78791457 a.u.

(5*S*,1'*R*)-**9b**, Conf. E

|   |           |           |           |
|---|-----------|-----------|-----------|
| C | 0.145529  | -0.759921 | -1.631666 |
| C | 1.670994  | -0.950352 | -1.396033 |
| N | 1.902596  | -0.048834 | -0.201404 |
| C | 0.770256  | 0.551260  | 0.123315  |
| N | -0.262415 | 0.220889  | -0.607255 |
| C | 2.121471  | -2.435067 | -1.288059 |
| C | 3.649515  | -2.524701 | -1.134174 |
| C | 1.741301  | -3.098276 | -2.630166 |
| C | 1.435942  | -3.190647 | -0.141009 |
| C | -1.673685 | 0.637323  | -0.448326 |
| C | 3.189265  | 0.430382  | 0.279194  |
| C | 3.926708  | 1.310772  | -0.537524 |
| C | 5.187878  | 1.706055  | -0.089414 |
| C | 5.681910  | 1.284486  | 1.134952  |
| C | 4.906538  | 0.477291  | 1.951883  |
| C | 3.644459  | 0.034421  | 1.552101  |
| C | 2.817546  | -0.788828 | 2.532300  |
| C | 3.549753  | -2.054046 | 3.009046  |
| C | 2.389052  | 0.068196  | 3.738713  |
| C | 3.397638  | 1.905628  | -1.839133 |
| C | 3.233933  | 3.431499  | -1.714328 |
| C | 4.276361  | 1.547055  | -3.048812 |
| C | -1.786881 | 1.880257  | 0.459475  |
| C | -2.524914 | -0.536819 | 0.011799  |
| C | -2.248164 | -1.200481 | 1.212293  |
| C | -3.056958 | -2.252607 | 1.614218  |

|   |           |           |           |
|---|-----------|-----------|-----------|
| C | -4.144284 | -2.662021 | 0.843310  |
| C | -4.419974 | -2.000116 | -0.352955 |
| C | -3.601452 | -0.940206 | -0.763648 |
| C | -3.171036 | 2.490462  | 0.439536  |
| C | -3.562176 | 3.313221  | -0.620204 |
| C | -4.833948 | 3.875482  | -0.652288 |
| C | -5.733832 | 3.624556  | 0.379997  |
| C | -5.352826 | 2.810555  | 1.441983  |
| C | -4.079870 | 2.248043  | 1.470423  |
| O | -5.447349 | -2.307319 | -1.188002 |
| C | -6.329579 | -3.371815 | -0.827189 |
| H | -0.080277 | -0.366403 | -2.622224 |
| H | -0.418416 | -1.679039 | -1.488341 |
| H | 2.227093  | -0.516286 | -2.225268 |
| H | 0.718450  | 1.272606  | 0.924616  |
| H | 3.999327  | -2.100339 | -0.195116 |
| H | 4.162936  | -2.009347 | -1.948871 |
| H | 3.956424  | -3.571917 | -1.160550 |
| H | 2.188025  | -2.573535 | -3.478269 |
| H | 0.661542  | -3.140613 | -2.784556 |
| H | 2.110347  | -4.124808 | -2.643543 |
| H | 1.703667  | -2.784177 | 0.832861  |
| H | 0.347700  | -3.182644 | -0.223891 |
| H | 1.750945  | -4.235401 | -0.156553 |
| H | -1.998991 | 0.921292  | -1.451175 |
| H | 5.783375  | 2.372648  | -0.699580 |
| H | 6.662953  | 1.604661  | 1.463136  |
| H | 5.286496  | 0.187744  | 2.922913  |
| H | 1.907164  | -1.109828 | 2.027443  |
| H | 2.894802  | -2.643124 | 3.654360  |
| H | 3.856910  | -2.685235 | 2.174120  |
| H | 4.442592  | -1.806071 | 3.585612  |
| H | 1.730317  | -0.505929 | 4.393808  |
| H | 1.859204  | 0.971498  | 3.429102  |
| H | 3.254541  | 0.380191  | 4.326719  |
| H | 2.400891  | 1.508179  | -2.029073 |
| H | 2.792693  | 3.836718  | -2.627435 |
| H | 2.584700  | 3.693278  | -0.876366 |
| H | 4.194959  | 3.925285  | -1.560748 |
| H | 3.835088  | 1.944904  | -3.964963 |
| H | 4.385982  | 0.467233  | -3.165308 |
| H | 5.277134  | 1.971987  | -2.952741 |
| H | -1.522709 | 1.610531  | 1.483817  |
| H | -1.065077 | 2.625679  | 0.115175  |
| H | -1.411584 | -0.900543 | 1.831812  |
| H | -2.847184 | -2.768876 | 2.542848  |
| H | -4.758054 | -3.483682 | 1.182492  |
| H | -3.835470 | -0.439384 | -1.695037 |
| H | -2.864812 | 3.525404  | -1.423464 |
| H | -5.119315 | 4.514890  | -1.478620 |
| H | -6.723205 | 4.064275  | 0.358475  |
| H | -6.045213 | 2.613906  | 2.251320  |
| H | -3.792005 | 1.616055  | 2.302203  |
| H | -7.064111 | -3.429187 | -1.626049 |
| H | -5.794848 | -4.322245 | -0.756184 |
| H | -6.836269 | -3.162428 | 0.118073  |

B3LYP energy = -1507.78776618 a.u.

(5*S*,1'*R*)-**9b**, Conf. F

|   |           |           |           |
|---|-----------|-----------|-----------|
| C | -0.922411 | -0.426278 | 1.184726  |
| C | 0.508716  | -1.000381 | 1.396789  |
| N | 1.216386  | -0.513373 | 0.148919  |
| C | 0.342265  | 0.089300  | -0.638124 |
| N | -0.868903 | 0.189309  | -0.154758 |
| C | 1.135430  | -0.664191 | 2.779429  |
| C | 0.196645  | -1.282965 | 3.838481  |
| C | 1.262016  | 0.843866  | 3.035744  |
| C | 2.511707  | -1.336511 | 2.925395  |
| C | -2.026944 | 0.798457  | -0.853849 |
| C | 2.503249  | -0.977847 | -0.347610 |
| C | 2.609494  | -2.306426 | -0.805083 |
| C | 3.867917  | -2.752386 | -1.210930 |
| C | 4.966766  | -1.907686 | -1.209371 |
| C | 4.820007  | -0.584145 | -0.825785 |
| C | 3.591024  | -0.084104 | -0.391498 |
| C | 3.480260  | 1.397600  | -0.056531 |
| C | 4.509754  | 1.848717  | 0.992132  |
| C | 3.602398  | 2.252201  | -1.331957 |
| C | 1.421316  | -3.251817 | -0.949943 |
| C | 1.177835  | -3.596457 | -2.431030 |
| C | 1.577994  | -4.531006 | -0.111155 |
| C | -2.404721 | 2.166603  | -0.249496 |
| C | -3.167843 | -0.209272 | -0.933857 |
| C | -3.144217 | -1.154130 | -1.956042 |
| C | -4.159120 | -2.104656 | -2.049076 |
| C | -5.195669 | -2.118773 | -1.131777 |
| C | -5.229199 | -1.168982 | -0.105102 |
| C | -4.214666 | -0.213726 | -0.006627 |
| C | -1.353517 | 3.236036  | -0.447701 |
| C | -1.079609 | 3.730595  | -1.727813 |
| C | -0.127384 | 4.725385  | -1.919718 |
| C | 0.567760  | 5.247279  | -0.831334 |
| C | 0.300724  | 4.768784  | 0.446649  |
| C | -0.652641 | 3.770455  | 0.634753  |
| O | -6.286515 | -1.254448 | 0.745219  |
| C | -6.400159 | -0.309734 | 1.808970  |
| H | -1.688166 | -1.198506 | 1.203160  |
| H | -1.175170 | 0.330577  | 1.924320  |
| H | 0.476419  | -2.087172 | 1.327917  |
| H | 0.607805  | 0.455676  | -1.619830 |
| H | 0.083511  | -2.359657 | 3.691274  |
| H | -0.797506 | -0.831713 | 3.834146  |
| H | 0.618953  | -1.126770 | 4.832179  |
| H | 0.299448  | 1.357727  | 3.003355  |
| H | 1.924964  | 1.325997  | 2.319627  |
| H | 1.678189  | 1.008844  | 4.031043  |
| H | 2.446807  | -2.413010 | 2.752899  |
| H | 3.251256  | -0.928903 | 2.238869  |
| H | 2.883048  | -1.186440 | 3.940736  |
| H | -1.676131 | 0.968563  | -1.871973 |
| H | 3.983691  | -3.772020 | -1.554687 |

|   |           |           |           |
|---|-----------|-----------|-----------|
| H | 5.933556  | -2.275215 | -1.530378 |
| H | 5.675798  | 0.076762  | -0.868617 |
| H | 2.489846  | 1.579399  | 0.358278  |
| H | 4.336240  | 2.893319  | 1.258516  |
| H | 4.448728  | 1.252953  | 1.903969  |
| H | 5.529479  | 1.772834  | 0.610721  |
| H | 3.444596  | 3.306354  | -1.096181 |
| H | 2.868522  | 1.960842  | -2.085921 |
| H | 4.593711  | 2.151095  | -1.778460 |
| H | 0.521926  | -2.742587 | -0.605298 |
| H | 0.278405  | -4.207772 | -2.530592 |
| H | 1.045839  | -2.694711 | -3.032426 |
| H | 2.012269  | -4.159921 | -2.852354 |
| H | 0.683522  | -5.150678 | -0.201113 |
| H | 1.731184  | -4.307942 | 0.946273  |
| H | 2.428103  | -5.126557 | -0.449232 |
| H | -3.334116 | 2.473141  | -0.734689 |
| H | -2.628874 | 2.062432  | 0.813238  |
| H | -2.342879 | -1.145122 | -2.685031 |
| H | -4.143761 | -2.834332 | -2.848925 |
| H | -5.993092 | -2.847770 | -1.194538 |
| H | -4.244489 | 0.527297  | 0.778112  |
| H | -1.628438 | 3.349469  | -2.582402 |
| H | 0.063982  | 5.101855  | -2.917098 |
| H | 1.304473  | 6.027023  | -0.979062 |
| H | 0.827871  | 5.176466  | 1.300502  |
| H | -0.863676 | 3.418772  | 1.638264  |
| H | -7.313515 | -0.569320 | 2.337496  |
| H | -5.552889 | -0.381032 | 2.496248  |
| H | -6.480778 | 0.710967  | 1.426821  |

B3LYP energy = -1507.78729554 a.u.

(5*S*,1'*R*)-**9b**, Conf. G

|   |           |           |           |
|---|-----------|-----------|-----------|
| C | -0.700298 | 0.163818  | 1.716872  |
| C | 0.578956  | -0.724847 | 1.698450  |
| N | 1.004719  | -0.608839 | 0.249972  |
| C | 0.124358  | 0.126421  | -0.406031 |
| N | -0.850772 | 0.610316  | 0.318634  |
| C | 1.619559  | -0.371322 | 2.799070  |
| C | 2.816571  | -1.336205 | 2.741589  |
| C | 0.903920  | -0.589152 | 4.150361  |
| C | 2.115471  | 1.078761  | 2.716353  |
| C | -1.975963 | 1.429967  | -0.195512 |
| C | 1.968862  | -1.457265 | -0.433537 |
| C | 1.654207  | -2.818008 | -0.620652 |
| C | 2.623776  | -3.632003 | -1.207497 |
| C | 3.836445  | -3.114323 | -1.634717 |
| C | 4.090886  | -1.757885 | -1.509089 |
| C | 3.168396  | -0.895937 | -0.913157 |
| C | 3.477070  | 0.595410  | -0.876748 |
| C | 4.827783  | 0.909477  | -0.213494 |
| C | 3.423213  | 1.194429  | -2.295223 |
| C | 0.296438  | -3.429135 | -0.289178 |
| C | -0.417059 | -3.893864 | -1.572067 |
| C | 0.399584  | -4.579136 | 0.725711  |

|   |           |           |           |
|---|-----------|-----------|-----------|
| C | -1.868374 | 2.901275  | 0.256049  |
| C | -3.301145 | 0.756256  | 0.140127  |
| C | -4.034480 | 1.080255  | 1.276830  |
| C | -5.232048 | 0.412192  | 1.539530  |
| C | -5.701759 | -0.566062 | 0.682363  |
| C | -4.971010 | -0.893911 | -0.465998 |
| C | -3.772273 | -0.232841 | -0.731980 |
| C | -0.668315 | 3.629032  | -0.307079 |
| C | 0.377348  | 4.043199  | 0.519410  |
| C | 1.474277  | 4.725476  | -0.002020 |
| C | 1.540266  | 5.004143  | -1.362815 |
| C | 0.500963  | 4.601016  | -2.198031 |
| C | -0.592827 | 3.921594  | -1.673274 |
| O | -5.509294 | -1.858698 | -1.257836 |
| C | -4.833012 | -2.219477 | -2.461825 |
| H | -1.587486 | -0.386721 | 2.022444  |
| H | -0.588709 | 1.027620  | 2.367859  |
| H | 0.302293  | -1.765956 | 1.858993  |
| H | 0.194879  | 0.298976  | -1.470715 |
| H | 3.402426  | -1.220198 | 1.831878  |
| H | 2.491483  | -2.376856 | 2.804815  |
| H | 3.477447  | -1.144267 | 3.588776  |
| H | 0.534147  | -1.612994 | 4.245022  |
| H | 0.062682  | 0.091459  | 4.294205  |
| H | 1.607068  | -0.413201 | 4.965662  |
| H | 2.634575  | 1.281827  | 1.780997  |
| H | 1.305976  | 1.803576  | 2.817466  |
| H | 2.817885  | 1.268624  | 3.529689  |
| H | -1.858391 | 1.405705  | -1.279818 |
| H | 2.415741  | -4.684415 | -1.351403 |
| H | 4.574008  | -3.764642 | -2.088342 |
| H | 5.023561  | -1.357990 | -1.884737 |
| H | 2.704197  | 1.090142  | -0.290274 |
| H | 4.962591  | 1.990396  | -0.139044 |
| H | 4.893116  | 0.491213  | 0.791941  |
| H | 5.662592  | 0.514399  | -0.794870 |
| H | 3.570216  | 2.275310  | -2.252881 |
| H | 2.464425  | 1.003126  | -2.781827 |
| H | 4.205092  | 0.771934  | -2.929762 |
| H | -0.338613 | -2.660348 | 0.149561  |
| H | -1.414812 | -4.267106 | -1.331515 |
| H | -0.520627 | -3.074541 | -2.286306 |
| H | 0.130455  | -4.699062 | -2.065220 |
| H | -0.595760 | -4.955780 | 0.969655  |
| H | 0.878036  | -4.259983 | 1.653339  |
| H | 0.979732  | -5.412187 | 0.324565  |
| H | -2.785851 | 3.392349  | -0.075909 |
| H | -1.861287 | 2.965931  | 1.344953  |
| H | -3.697573 | 1.848077  | 1.959737  |
| H | -5.804493 | 0.666339  | 2.422782  |
| H | -6.632361 | -1.083825 | 0.875432  |
| H | -3.199978 | -0.470548 | -1.618404 |
| H | 0.328639  | 3.849154  | 1.584706  |
| H | 2.271647  | 5.045206  | 0.657594  |
| H | 2.389109  | 5.539533  | -1.769467 |
| H | 0.536959  | 4.826557  | -3.256800 |

|   |           |           |           |
|---|-----------|-----------|-----------|
| H | -1.404772 | 3.633822  | -2.332312 |
| H | -5.440310 | -2.994833 | -2.921005 |
| H | -4.755734 | -1.368198 | -3.142980 |
| H | -3.836214 | -2.616461 | -2.252784 |

B3LYP energy = -1507.78701315 a.u.

(5*S*,1'*R*)-**9b**, Conf. H

|   |           |           |           |
|---|-----------|-----------|-----------|
| C | 0.271185  | -2.064891 | 0.956986  |
| C | 1.791869  | -1.750542 | 0.869711  |
| N | 1.777113  | -0.414049 | 0.162299  |
| C | 0.533324  | -0.085674 | -0.138480 |
| N | -0.377723 | -0.943189 | 0.246813  |
| C | 2.549729  | -1.856612 | 2.224533  |
| C | 4.049414  | -1.576362 | 2.027572  |
| C | 2.398645  | -3.322895 | 2.685169  |
| C | 1.985649  | -0.927081 | 3.308676  |
| C | -1.856950 | -0.768022 | 0.231240  |
| C | 2.914306  | 0.246356  | -0.458969 |
| C | 3.496324  | -0.346682 | -1.596206 |
| C | 4.626917  | 0.265768  | -2.138379 |
| C | 5.134329  | 1.440503  | -1.605918 |
| C | 4.499254  | 2.044068  | -0.531961 |
| C | 3.375083  | 1.470341  | 0.064602  |
| C | 2.676619  | 2.222383  | 1.190664  |
| C | 3.628685  | 2.602015  | 2.336266  |
| C | 1.960853  | 3.473144  | 0.645858  |
| C | 2.917198  | -1.566833 | -2.306194 |
| C | 2.402603  | -1.185184 | -3.706657 |
| C | 3.916835  | -2.731683 | -2.388643 |
| C | -2.521350 | -1.954440 | -0.504903 |
| C | -2.248708 | 0.595222  | -0.305619 |
| C | -2.176890 | 0.899593  | -1.670902 |
| C | -2.544798 | 2.162879  | -2.111621 |
| C | -2.992412 | 3.136803  | -1.221163 |
| C | -3.066341 | 2.834663  | 0.138881  |
| C | -2.688004 | 1.563262  | 0.587361  |
| C | -4.018568 | -2.005338 | -0.294661 |
| C | -4.545073 | -2.452867 | 0.920676  |
| C | -5.919557 | -2.501158 | 1.127180  |
| C | -6.791582 | -2.106022 | 0.116123  |
| C | -6.279187 | -1.664279 | -1.099378 |
| C | -4.902618 | -1.613876 | -1.301186 |
| O | -3.486399 | 3.695948  | 1.101255  |
| C | -3.920294 | 5.001459  | 0.712853  |
| H | 0.022787  | -3.010463 | 0.480867  |
| H | -0.093594 | -2.087894 | 1.983387  |
| H | 2.269007  | -2.458129 | 0.193225  |
| H | 0.289524  | 0.818847  | -0.674624 |
| H | 4.246593  | -0.543814 | 1.746161  |
| H | 4.479262  | -2.222904 | 1.259465  |
| H | 4.580729  | -1.772668 | 2.960605  |
| H | 2.789230  | -4.018643 | 1.938699  |
| H | 1.361088  | -3.591802 | 2.892843  |
| H | 2.963263  | -3.473500 | 3.606332  |
| H | 2.078062  | 0.122843  | 3.035848  |

|   |           |           |           |   |           |           |           |
|---|-----------|-----------|-----------|---|-----------|-----------|-----------|
| H | 0.936313  | -1.129260 | 3.531716  | C | 2.133309  | 2.866776  | 2.041031  |
| H | 2.541735  | -1.073855 | 4.236147  | C | 2.577921  | -0.575598 | -2.787387 |
| H | -2.156955 | -0.813702 | 1.280742  | C | 1.940792  | 0.326613  | -3.860471 |
| H | 5.105136  | -0.172348 | -3.004958 | C | 3.526952  | -1.600049 | -3.429971 |
| H | 6.012427  | 1.899166  | -2.043305 | C | -2.642117 | -1.482951 | -0.862030 |
| H | 4.882154  | 2.981840  | -0.151096 | C | -2.282094 | 0.583905  | 0.641842  |
| H | 1.909314  | 1.572362  | 1.608422  | C | -2.581716 | 0.953325  | 1.956447  |
| H | 3.063875  | 3.053745  | 3.154393  | C | -2.924727 | 2.267653  | 2.243459  |
| H | 4.156071  | 1.731928  | 2.730077  | C | -2.970912 | 3.233760  | 1.242344  |
| H | 4.376224  | 3.329015  | 2.014269  | C | -2.669272 | 2.869024  | -0.071249 |
| H | 1.408710  | 3.970547  | 1.446010  | C | -2.327947 | 1.544194  | -0.363467 |
| H | 1.254252  | 3.222247  | -0.148176 | C | -4.126916 | -1.649690 | -0.626937 |
| H | 2.676887  | 4.188588  | 0.236618  | C | -4.598215 | -2.669715 | 0.204869  |
| H | 2.049605  | -1.920301 | -1.749873 | C | -5.960709 | -2.833112 | 0.431093  |
| H | 1.935186  | -2.049637 | -4.183011 | C | -6.876482 | -1.978866 | -0.177658 |
| H | 1.662443  | -0.384084 | -3.653161 | C | -6.419526 | -0.964508 | -1.012708 |
| H | 3.215081  | -0.846766 | -4.352088 | C | -5.054662 | -0.801716 | -1.233975 |
| H | 3.444577  | -3.599886 | -2.852898 | O | -2.681580 | 3.718933  | -1.131768 |
| H | 4.276523  | -3.027790 | -1.401612 | C | -3.047072 | 5.084166  | -0.915077 |
| H | 4.787137  | -2.467720 | -2.992259 | H | -0.130841 | -3.017256 | -0.452252 |
| H | -2.289056 | -1.898374 | -1.568785 | H | -0.012470 | -2.751791 | 1.290657  |
| H | -2.083416 | -2.883119 | -0.134054 | H | 2.091354  | -2.398324 | -0.804417 |
| H | -1.843965 | 0.160681  | -2.388368 | H | 0.210120  | 0.958231  | -0.059051 |
| H | -2.493027 | 2.399225  | -3.167099 | H | 4.355941  | -1.284472 | 1.086787  |
| H | -3.280516 | 4.108741  | -1.594307 | H | 4.423339  | -2.642902 | -0.036303 |
| H | -2.759710 | 1.350552  | 1.646854  | H | 4.752510  | -2.895015 | 1.676133  |
| H | -3.876551 | -2.777306 | 1.711089  | H | 2.716878  | -4.534477 | 0.104636  |
| H | -6.310019 | -2.854795 | 2.073623  | H | 1.441902  | -4.507813 | 1.331284  |
| H | -7.862186 | -2.146855 | 0.273877  | H | 3.121687  | -4.696263 | 1.813155  |
| H | -6.950263 | -1.360178 | -1.893331 | H | 2.402376  | -1.158275 | 2.817721  |
| H | -4.513496 | -1.268618 | -2.251677 | H | 1.250910  | -2.491244 | 2.934650  |
| H | -4.217888 | 5.498337  | 1.632276  | H | 2.929307  | -2.737170 | 3.381682  |
| H | -3.110621 | 5.563609  | 0.241168  | H | -2.156528 | -1.446563 | 1.233595  |
| H | -4.775419 | 4.947113  | 0.035062  | H | 4.730600  | 1.001597  | -3.094711 |

B3LYP energy = -1507.78697646 a.u.

(5*S*,1'*R*)-**9b**, Conf. I

|   |           |           |           |   |           |           |           |
|---|-----------|-----------|-----------|---|-----------|-----------|-----------|
| C | 0.226812  | -2.333196 | 0.313879  | H | 5.799870  | 2.520677  | -1.486129 |
| C | 1.741688  | -2.017551 | 0.154148  | H | 4.899138  | 2.744457  | 0.788363  |
| N | 1.718191  | -0.508646 | 0.040022  | H | 2.059102  | 0.737944  | 2.135469  |
| C | 0.466752  | -0.084526 | 0.047906  | H | 3.441866  | 1.436383  | 4.016587  |
| N | -0.437072 | -1.020363 | 0.185424  | H | 4.408380  | 0.389064  | 2.973083  |
| C | 2.647760  | -2.660295 | 1.243030  | H | 4.653394  | 2.134987  | 2.947347  |
| C | 4.128367  | -2.342472 | 0.971522  | H | 1.687826  | 2.993133  | 3.030019  |
| C | 2.461702  | -4.187644 | 1.108910  | H | 1.342890  | 2.982552  | 1.296888  |
| C | 2.277085  | -2.229387 | 2.669245  | H | 2.850165  | 3.676396  | 1.890437  |
| C | -1.908920 | -0.857272 | 0.347881  | H | 1.759674  | -1.130496 | -2.330121 |
| C | 2.814708  | 0.349346  | -0.381209 | H | 1.393756  | -0.281471 | -4.584101 |
| C | 3.263105  | 0.264841  | -1.714198 | H | 1.243624  | 1.040296  | -3.417312 |
| C | 4.355729  | 1.051845  | -2.080605 | H | 2.698416  | 0.892586  | -4.405459 |
| C | 4.953474  | 1.918784  | -1.179377 | H | 2.983948  | -2.213495 | -4.151833 |
| C | 4.448467  | 2.035876  | 0.105777  | H | 3.971251  | -2.263654 | -2.686049 |
| C | 3.368672  | 1.263005  | 0.536878  | H | 4.342340  | -1.107750 | -3.963200 |
| C | 2.820640  | 1.491885  | 1.940197  | H | -2.464029 | -0.874667 | -1.749507 |
| C | 3.897870  | 1.351547  | 3.028085  | H | -2.204269 | -2.463400 | -1.059451 |
|   |           |           |           | H | -2.560511 | 0.213769  | 2.747025  |
|   |           |           |           | H | -3.166688 | 2.550224  | 3.260371  |
|   |           |           |           | H | -3.245734 | 4.248388  | 1.491200  |
|   |           |           |           | H | -2.112802 | 1.297982  | -1.395501 |



|   |           |           |           |
|---|-----------|-----------|-----------|
| H | -3.895751 | -3.351511 | 0.672335  |
| H | -6.307840 | -3.631815 | 1.075174  |
| H | -7.938025 | -2.107073 | -0.006122 |
| H | -7.125006 | -0.299362 | -1.495468 |
| H | -4.710012 | -0.009340 | -1.887621 |
| H | -4.064064 | 5.163144  | -0.523944 |
| H | -2.350026 | 5.576897  | -0.232907 |
| H | -2.996277 | 5.560514  | -1.890461 |

B3LYP energy = -1507.78697405 a.u.

(5*S*,1'*R*)-**9b**, Conf. J

|   |           |           |           |
|---|-----------|-----------|-----------|
| C | -0.244347 | -1.552977 | -1.390820 |
| C | -1.613446 | -0.867028 | -1.115493 |
| N | -1.195239 | 0.286495  | -0.227388 |
| C | 0.100292  | 0.204358  | 0.018680  |
| N | 0.717013  | -0.783410 | -0.575919 |
| C | -2.440639 | -0.551341 | -2.394991 |
| C | -3.801032 | 0.063396  | -2.024271 |
| C | -2.705966 | -1.912961 | -3.074174 |
| C | -1.708797 | 0.369997  | -3.381953 |
| C | 2.179192  | -1.069372 | -0.547244 |
| C | -2.075758 | 1.136550  | 0.557015  |
| C | -2.775732 | 0.563890  | 1.637020  |
| C | -3.673038 | 1.377165  | 2.330545  |
| C | -3.835820 | 2.713692  | 2.001158  |
| C | -3.078229 | 3.272247  | 0.983745  |
| C | -2.179182 | 2.505293  | 0.240586  |
| C | -1.323865 | 3.194298  | -0.815489 |
| C | -2.157919 | 3.991458  | -1.830985 |
| C | -0.268659 | 4.102386  | -0.154813 |
| C | -2.549219 | -0.861205 | 2.132113  |
| C | -1.953384 | -0.852521 | 3.552317  |
| C | -3.826486 | -1.715262 | 2.081101  |
| C | 2.540225  | -2.037086 | 0.600205  |
| C | 2.980777  | 0.224000  | -0.555093 |
| C | 3.246429  | 0.841277  | -1.783256 |
| C | 3.953996  | 2.033361  | -1.818095 |
| C | 4.410981  | 2.633354  | -0.646192 |
| C | 4.152767  | 2.017729  | 0.578457  |
| C | 3.438201  | 0.813252  | 0.616897  |
| C | 1.906712  | -3.405431 | 0.490986  |
| C | 0.855223  | -3.780477 | 1.329621  |
| C | 0.270520  | -5.040253 | 1.222036  |
| C | 0.733452  | -5.945568 | 0.272732  |
| C | 1.787455  | -5.586015 | -0.563911 |
| C | 2.369232  | -4.327896 | -0.452888 |
| O | 4.549528  | 2.500131  | 1.785465  |
| C | 5.293751  | 3.719823  | 1.827438  |
| H | -0.234573 | -2.597663 | -1.091350 |
| H | 0.052852  | -1.487051 | -2.436417 |
| H | -2.231189 | -1.522035 | -0.502200 |
| H | 0.608300  | 0.905886  | 0.664209  |
| H | -3.703853 | 1.050794  | -1.577022 |
| H | -4.349006 | -0.571257 | -1.324639 |
| H | -4.410319 | 0.164439  | -2.924340 |

|   |           |           |           |
|---|-----------|-----------|-----------|
| H | -3.219373 | -2.602065 | -2.399277 |
| H | -1.789030 | -2.393975 | -3.420044 |
| H | -3.344076 | -1.764228 | -3.946445 |
| H | -1.538277 | 1.361604  | -2.966627 |
| H | -0.746811 | -0.034603 | -3.702226 |
| H | -2.317144 | 0.492953  | -4.279711 |
| H | 2.367459  | -1.576320 | -1.494653 |
| H | -4.236466 | 0.962310  | 3.156280  |
| H | -4.537274 | 3.326601  | 2.553429  |
| H | -3.184892 | 4.325975  | 0.762047  |
| H | -0.783992 | 2.427132  | -1.369090 |
| H | -1.508354 | 4.393867  | -2.611018 |
| H | -2.915547 | 3.369587  | -2.309947 |
| H | -2.666344 | 4.834952  | -1.360920 |
| H | 0.378213  | 4.542938  | -0.916402 |
| H | 0.362224  | 3.551436  | 0.545938  |
| H | -0.741232 | 4.917532  | 0.397291  |
| H | -1.807749 | -1.340711 | 1.493338  |
| H | -1.722623 | -1.871582 | 3.869897  |
| H | -1.033333 | -0.266240 | 3.592960  |
| H | -2.651781 | -0.428617 | 4.275989  |
| H | -3.610287 | -2.734303 | 2.408211  |
| H | -4.242678 | -1.764238 | 1.073345  |
| H | -4.599297 | -1.313806 | 2.739098  |
| H | 3.627947  | -2.135399 | 0.593731  |
| H | 2.266634  | -1.583833 | 1.554295  |
| H | 2.909651  | 0.382692  | -2.704946 |
| H | 4.165495  | 2.506146  | -2.769097 |
| H | 4.965196  | 3.558903  | -0.700931 |
| H | 3.276261  | 0.359981  | 1.585702  |
| H | 0.494348  | -3.085638 | 2.079677  |
| H | -0.539951 | -5.316169 | 1.885532  |
| H | 0.284158  | -6.927402 | 0.191195  |
| H | 2.163097  | -6.290014 | -1.296282 |
| H | 3.199498  | -4.064765 | -1.099217 |
| H | 5.499507  | 3.902903  | 2.878637  |
| H | 6.236561  | 3.626444  | 1.283179  |
| H | 4.713273  | 4.551397  | 1.420341  |

B3LYP energy = -1507.78690236 a.u.

(5*S*,1'*R*)-**9b**, Conf. K

|   |           |           |           |
|---|-----------|-----------|-----------|
| C | 0.128690  | -0.710145 | -1.641301 |
| C | 1.671274  | -0.802344 | -1.477504 |
| N | 1.882893  | 0.006566  | -0.213329 |
| C | 0.731179  | 0.528130  | 0.173287  |
| N | -0.299956 | 0.197338  | -0.560623 |
| C | 2.232144  | -2.251358 | -1.532399 |
| C | 3.768291  | -2.241047 | -1.447165 |
| C | 1.841206  | -2.808245 | -2.919414 |
| C | 1.654265  | -3.165565 | -0.443175 |
| C | -1.728472 | 0.515519  | -0.350883 |
| C | 3.153541  | 0.483176  | 0.308835  |
| C | 3.866743  | 1.450983  | -0.425327 |
| C | 5.114487  | 1.842692  | 0.061830  |
| C | 5.615385  | 1.334443  | 1.250005  |

|   |           |           |           |
|---|-----------|-----------|-----------|
| C | 4.860870  | 0.439401  | 1.991944  |
| C | 3.615259  | -0.006033 | 1.546801  |
| C | 2.803586  | -0.933582 | 2.442189  |
| C | 3.587797  | -2.184059 | 2.871828  |
| C | 2.279735  | -0.176129 | 3.677012  |
| C | 3.324422  | 2.138765  | -1.674510 |
| C | 3.131555  | 3.646280  | -1.427152 |
| C | 4.208979  | 1.894805  | -2.907972 |
| C | -1.901097 | 1.761904  | 0.543680  |
| C | -2.483338 | -0.708032 | 0.150871  |
| C | -2.095677 | -1.362743 | 1.316370  |
| C | -2.826279 | -2.462506 | 1.763470  |
| C | -3.933131 | -2.910415 | 1.061216  |
| C | -4.325554 | -2.255682 | -0.110500 |
| C | -3.594648 | -1.155852 | -0.565841 |
| C | -3.315980 | 2.297000  | 0.522680  |
| C | -3.752112 | 3.089632  | -0.542713 |
| C | -5.052404 | 3.582315  | -0.576984 |
| C | -5.936359 | 3.290198  | 0.458444  |
| C | -5.510849 | 2.505673  | 1.525793  |
| C | -4.209197 | 2.013217  | 1.556627  |
| O | -5.420099 | -2.761050 | -0.738132 |
| C | -5.887937 | -2.128240 | -1.929810 |
| H | -0.167630 | -0.294121 | -2.603335 |
| H | -0.363909 | -1.672066 | -1.510795 |
| H | 2.157050  | -0.250655 | -2.281475 |
| H | 0.664463  | 1.190968  | 1.023489  |
| H | 4.131875  | -1.883511 | -0.485406 |
| H | 4.204622  | -1.614639 | -2.228523 |
| H | 4.145945  | -3.255235 | -1.589169 |
| H | 2.215075  | -2.172954 | -3.725983 |
| H | 0.761068  | -2.912918 | -3.038939 |
| H | 2.278615  | -3.799353 | -3.048524 |
| H | 1.930310  | -2.835413 | 0.556538  |
| H | 0.566104  | -3.237328 | -0.487700 |
| H | 2.046350  | -4.175595 | -0.573563 |
| H | -2.103520 | 0.762451  | -1.345776 |
| H | 5.692995  | 2.574596  | -0.487037 |
| H | 6.585187  | 1.654118  | 1.610499  |
| H | 5.245499  | 0.081412  | 2.937932  |
| H | 1.934786  | -1.272969 | 1.879477  |
| H | 2.936958  | -2.856398 | 3.434526  |
| H | 3.978304  | -2.732177 | 2.013128  |
| H | 4.430639  | -1.928756 | 3.516413  |
| H | 1.644436  | -0.828678 | 4.279682  |
| H | 1.695561  | 0.703399  | 3.396928  |
| H | 3.103954  | 0.163983  | 4.307276  |
| H | 2.335181  | 1.738460  | -1.894931 |
| H | 2.683499  | 4.115933  | -2.305384 |
| H | 2.477241  | 3.827854  | -0.572117 |
| H | 4.082791  | 4.143978  | -1.231752 |
| H | 3.761837  | 2.357483  | -3.790059 |
| H | 4.336584  | 0.829891  | -3.110467 |
| H | 5.202422  | 2.326918  | -2.774947 |
| H | -1.621050 | 1.518004  | 1.569742  |
| H | -1.221413 | 2.539739  | 0.185947  |

|   |           |           |           |
|---|-----------|-----------|-----------|
| H | -1.233828 | -1.028552 | 1.881767  |
| H | -2.528240 | -2.974353 | 2.670033  |
| H | -4.506656 | -3.762801 | 1.401505  |
| H | -3.886283 | -0.637479 | -1.468241 |
| H | -3.066876 | 3.334710  | -1.347190 |
| H | -5.372454 | 4.200799  | -1.406585 |
| H | -6.947853 | 3.676292  | 0.435686  |
| H | -6.190815 | 2.278135  | 2.337514  |
| H | -3.885895 | 1.404633  | 2.392837  |
| H | -6.761410 | -2.695031 | -2.240837 |
| H | -6.176155 | -1.091244 | -1.740768 |
| H | -5.133374 | -2.163394 | -2.720094 |

B3LYP energy = -1507.78687339 a.u.

(5S,1'R)-**9b**, Conf. L

|   |           |           |           |
|---|-----------|-----------|-----------|
| C | 0.048010  | 0.541483  | 1.437396  |
| C | -1.504025 | 0.674158  | 1.435733  |
| N | -1.861935 | -0.020355 | 0.138284  |
| C | -0.757423 | -0.430434 | -0.458241 |
| N | 0.351747  | -0.183476 | 0.188455  |
| C | -2.189568 | 0.178913  | 2.741332  |
| C | -1.895675 | -1.294413 | 3.056740  |
| C | -3.709073 | 0.407139  | 2.669647  |
| C | -1.635717 | 1.064301  | 3.879231  |
| C | 1.708706  | -0.596696 | -0.252311 |
| C | -3.140645 | 0.014578  | -0.552945 |
| C | -3.578655 | 1.236562  | -1.100566 |
| C | -4.832377 | 1.258352  | -1.713069 |
| C | -5.602392 | 0.110885  | -1.819733 |
| C | -5.118159 | -1.093807 | -1.335315 |
| C | -3.879837 | -1.176425 | -0.696185 |
| C | -3.377522 | -2.544984 | -0.251955 |
| C | -4.378970 | -3.279625 | 0.654296  |
| C | -3.017204 | -3.414321 | -1.471685 |
| C | -2.734171 | 2.506291  | -1.124078 |
| C | -2.348531 | 2.877470  | -2.567997 |
| C | -3.427679 | 3.685499  | -0.422218 |
| C | 2.317533  | -1.593524 | 0.759533  |
| C | 2.558961  | 0.622764  | -0.574560 |
| C | 2.661374  | 1.038495  | -1.906156 |
| C | 3.412794  | 2.160650  | -2.224817 |
| C | 4.068753  | 2.890298  | -1.236212 |
| C | 3.968180  | 2.478063  | 0.093243  |
| C | 3.213779  | 1.344594  | 0.415790  |
| C | 3.508011  | -2.340485 | 0.198112  |
| C | 3.312454  | -3.417928 | -0.671453 |
| C | 4.394370  | -4.111856 | -1.202349 |
| C | 5.693732  | -3.739365 | -0.868131 |
| C | 5.900534  | -2.672787 | 0.000576  |
| C | 4.815143  | -1.979545 | 0.529329  |
| O | 4.565211  | 3.102059  | 1.144216  |
| C | 5.380082  | 4.248305  | 0.890258  |
| H | 0.548150  | 1.507918  | 1.432081  |
| H | 0.410087  | -0.033818 | 2.286619  |
| H | -1.781196 | 1.720594  | 1.319917  |

|                                    |           |           |           |   |           |           |           |
|------------------------------------|-----------|-----------|-----------|---|-----------|-----------|-----------|
| H                                  | -0.775269 | -0.925441 | -1.418808 | C | -1.772138 | 1.694909  | 0.466373  |
| H                                  | -0.826996 | -1.499891 | 3.146152  | C | -2.874828 | 1.307333  | 1.253613  |
| H                                  | -2.307786 | -1.963558 | 2.303403  | C | -3.639715 | 2.317865  | 1.837515  |
| H                                  | -2.352263 | -1.558919 | 4.011931  | C | -3.302698 | 3.654146  | 1.688155  |
| H                                  | -4.189132 | -0.207650 | 1.910630  | C | -2.170680 | 4.005416  | 0.970085  |
| H                                  | -3.941283 | 1.452574  | 2.455064  | C | -1.376290 | 3.041515  | 0.346351  |
| H                                  | -4.159974 | 0.158102  | 3.631905  | C | -0.107028 | 3.489510  | -0.367667 |
| H                                  | -0.565649 | 0.921861  | 4.040883  | C | -0.373323 | 4.574232  | -1.424196 |
| H                                  | -1.813220 | 2.124161  | 3.681193  | C | 0.946959  | 3.973129  | 0.646051  |
| H                                  | -2.140635 | 0.812001  | 4.812826  | C | -3.231085 | -0.144454 | 1.557751  |
| H                                  | 1.541577  | -1.134283 | -1.185793 | C | -3.034411 | -0.450409 | 3.054266  |
| H                                  | -5.201756 | 2.184865  | -2.133268 | C | -4.654633 | -0.508948 | 1.106857  |
| H                                  | -6.571568 | 0.151154  | -2.301206 | C | 1.454405  | -2.851675 | 1.114513  |
| H                                  | -5.711511 | -1.990277 | -1.458857 | C | 2.870673  | -0.767087 | 0.604631  |
| H                                  | -2.463505 | -2.405514 | 0.324429  | C | 3.045732  | -0.434857 | 1.952658  |
| H                                  | -3.940187 | -4.212498 | 1.014252  | C | 4.063284  | 0.438050  | 2.317221  |
| H                                  | -4.656040 | -2.679547 | 1.522266  | C | 4.918160  | 0.989839  | 1.367427  |
| H                                  | -5.294701 | -3.534212 | 0.118071  | C | 4.747935  | 0.655864  | 0.022160  |
| H                                  | -2.607045 | -4.372263 | -1.145029 | C | 3.724056  | -0.221754 | -0.347917 |
| H                                  | -2.277672 | -2.928848 | -2.112576 | C | 0.497558  | -3.893829 | 0.582422  |
| H                                  | -3.898513 | -3.617577 | -2.083072 | C | -0.812226 | -3.972602 | 1.060059  |
| H                                  | -1.799263 | 2.316453  | -0.598873 | C | -1.697310 | -4.927279 | 0.564224  |
| H                                  | -1.697608 | 3.754318  | -2.568479 | C | -1.281161 | -5.820067 | -0.417899 |
| H                                  | -1.817310 | 2.059835  | -3.059481 | C | 0.025953  | -5.757778 | -0.895226 |
| H                                  | -3.229253 | 3.114061  | -3.167629 | C | 0.907180  | -4.804302 | -0.396977 |
| H                                  | -2.761304 | 4.549919  | -0.392856 | O | 5.520092  | 1.121946  | -0.993963 |
| H                                  | -3.709486 | 3.437377  | 0.602692  | C | 6.605864  | 1.998952  | -0.685374 |
| H                                  | -4.333982 | 3.985595  | -0.951263 | H | -0.649239 | -2.290209 | -1.341354 |
| H                                  | 2.602326  | -1.077134 | 1.676810  | H | 0.307688  | -1.150873 | -2.299550 |
| H                                  | 1.534728  | -2.307268 | 1.026882  | H | -2.365175 | -0.731554 | -0.981984 |
| H                                  | 2.165411  | 0.478027  | -2.689343 | H | 0.559106  | 0.586082  | 1.212763  |
| H                                  | 3.498895  | 2.475595  | -3.257287 | H | 0.213908  | 0.536370  | -3.518207 |
| H                                  | 4.651094  | 3.757846  | -1.510259 | H | -0.336073 | 2.021658  | -2.740266 |
| H                                  | 3.176553  | 1.050781  | 1.456459  | H | -0.966457 | 1.561405  | -4.314609 |
| H                                  | 2.304524  | -3.727776 | -0.926530 | H | -2.821641 | 2.217025  | -1.930649 |
| H                                  | 4.223303  | -4.948056 | -1.869265 | H | -3.889810 | 0.824786  | -2.119322 |
| H                                  | 6.537620  | -4.280832 | -1.277224 | H | -3.335885 | 1.712821  | -3.536830 |
| H                                  | 6.907701  | -2.380517 | 0.271399  | H | -1.408608 | -1.432770 | -3.834718 |
| H                                  | 4.989742  | -1.153581 | 1.208235  | H | -3.056782 | -1.331391 | -3.196528 |
| H                                  | 5.752803  | 4.565436  | 1.860615  | H | -2.576818 | -0.352006 | -4.582546 |
| H                                  | 6.222769  | 3.998264  | 0.241203  | H | 2.090965  | -2.140644 | -0.813606 |
| H                                  | 4.797687  | 5.057448  | 0.442833  | H | -4.501439 | 2.053041  | 2.436231  |
| B3LYP energy = -1507.78686433 a.u. |           |           |           | H | -3.910322 | 4.421370  | 2.151726  |
| (5S,1'R)- <b>9b</b> , Conf. M      |           |           |           | H | -1.894314 | 5.048981  | 0.894849  |
| C                                  | -0.298976 | -1.263687 | -1.401083 | H | 0.316890  | 2.628365  | -0.882645 |
| C                                  | -1.461422 | -0.234214 | -1.334299 | H | 0.545946  | 4.795398  | -1.970418 |
| N                                  | -0.996563 | 0.663181  | -0.204064 | H | -1.128546 | 4.260130  | -2.146107 |
| C                                  | 0.086261  | 0.143730  | 0.347831  | H | -0.715070 | 5.504579  | -0.967326 |
| N                                  | 0.536633  | -0.941404 | -0.226071 | H | 1.870768  | 4.241430  | 0.129291  |
| C                                  | -1.822950 | 0.413440  | -2.700909 | H | 1.183818  | 3.203114  | 1.383035  |
| C                                  | -0.654552 | 1.173741  | -3.343245 | H | 0.596237  | 4.854077  | 1.187429  |
| C                                  | -3.035278 | 1.349304  | -2.552454 | H | -2.542936 | -0.796503 | 1.021050  |
| C                                  | -2.236340 | -0.751899 | -3.626428 | H | -3.233260 | -1.505972 | 3.251347  |
| C                                  | 1.767632  | -1.701834 | 0.131218  | H | -2.013445 | -0.230742 | 3.373384  |
|                                    |           |           |           | H | -3.712617 | 0.137876  | 3.674795  |
|                                    |           |           |           | H | -4.844435 | -1.569787 | 1.282445  |

|   |           |           |           |
|---|-----------|-----------|-----------|
| H | -4.804923 | -0.307627 | 0.044929  |
| H | -5.405412 | 0.056677  | 1.661667  |
| H | 2.410948  | -3.319373 | 1.358098  |
| H | 1.058471  | -2.437064 | 2.042782  |
| H | 2.411107  | -0.857132 | 2.719851  |
| H | 4.202408  | 0.691497  | 3.360796  |
| H | 5.704541  | 1.660467  | 1.682005  |
| H | 3.619392  | -0.474999 | -1.395921 |
| H | -1.140878 | -3.287961 | 1.834055  |
| H | -2.707735 | -4.977862 | 0.951078  |
| H | -1.965692 | -6.566159 | -0.801730 |
| H | 0.361843  | -6.459361 | -1.648941 |
| H | 1.926566  | -4.776285 | -0.766207 |
| H | 7.079073  | 2.227594  | -1.636496 |
| H | 6.249223  | 2.923627  | -0.225098 |
| H | 7.329730  | 1.514089  | -0.026130 |

B3LYP energy = -1507.78686190 a.u.

(5*S*,1'*R*)-**9b**, Conf. N

|   |           |           |           |
|---|-----------|-----------|-----------|
| C | 0.142261  | -0.073124 | -1.789278 |
| C | 1.690714  | -0.000985 | -1.645278 |
| N | 1.855899  | -0.119193 | -0.144668 |
| C | 0.671472  | -0.287591 | 0.415194  |
| N | -0.338018 | -0.317485 | -0.415321 |
| C | 2.465041  | -1.015139 | -2.536087 |
| C | 2.064461  | -2.473964 | -2.272454 |
| C | 3.982208  | -0.845490 | -2.347608 |
| C | 2.130495  | -0.650407 | -3.998558 |
| C | -1.753699 | -0.551027 | -0.032572 |
| C | 3.038519  | 0.228219  | 0.625790  |
| C | 3.435154  | 1.579306  | 0.671375  |
| C | 4.612738  | 1.884193  | 1.355525  |
| C | 5.340997  | 0.902590  | 2.009272  |
| C | 4.887958  | -0.407281 | 2.013334  |
| C | 3.729887  | -0.778509 | 1.328265  |
| C | 3.247937  | -2.220664 | 1.430495  |
| C | 4.327892  | -3.241865 | 1.038180  |
| C | 2.715316  | -2.517359 | 2.845338  |
| C | 2.617320  | 2.721739  | 0.077158  |
| C | 2.148044  | 3.691988  | 1.176849  |
| C | 3.377995  | 3.476116  | -1.025876 |
| C | -2.261141 | -1.877784 | -0.643891 |
| C | -2.601615 | 0.673435  | -0.341024 |
| C | -3.034485 | 0.970509  | -1.638498 |
| C | -3.787887 | 2.113439  | -1.866646 |
| C | -4.130114 | 2.972828  | -0.825115 |
| C | -3.704229 | 2.675983  | 0.470020  |
| C | -2.939131 | 1.527329  | 0.701145  |
| C | -3.548918 | -2.355042 | -0.009058 |
| C | -3.523685 | -2.992372 | 1.235119  |
| C | -4.698620 | -3.433233 | 1.834588  |
| C | -5.921248 | -3.245127 | 1.195299  |
| C | -5.958199 | -2.616631 | -0.045132 |
| C | -4.780239 | -2.175368 | -0.641533 |
| O | -3.977199 | 3.431755  | 1.566429  |

|   |           |           |           |
|---|-----------|-----------|-----------|
| C | -4.763526 | 4.614287  | 1.406578  |
| H | -0.285153 | 0.855888  | -2.162080 |
| H | -0.173959 | -0.885480 | -2.438499 |
| H | 2.041023  | 0.990247  | -1.925802 |
| H | 0.547603  | -0.377179 | 1.485342  |
| H | 0.999255  | -2.652484 | -2.433346 |
| H | 2.311424  | -2.790021 | -1.259602 |
| H | 2.604790  | -3.129110 | -2.957792 |
| H | 4.310977  | -1.114649 | -1.345953 |
| H | 4.293366  | 0.183991  | -2.538666 |
| H | 4.511319  | -1.487441 | -3.054346 |
| H | 1.074684  | -0.790135 | -4.238169 |
| H | 2.395879  | 0.385765  | -4.221238 |
| H | 2.702220  | -1.291376 | -4.671095 |
| H | -1.728952 | -0.674656 | 1.049922  |
| H | 4.952038  | 2.911158  | 1.397649  |
| H | 6.250052  | 1.163141  | 2.536961  |
| H | 5.443298  | -1.157497 | 2.560624  |
| H | 2.415961  | -2.351913 | 0.740016  |
| H | 3.907805  | -4.249644 | 1.049343  |
| H | 4.720788  | -3.051628 | 0.038420  |
| H | 5.166987  | -3.229271 | 1.735742  |
| H | 2.310272  | -3.530478 | 2.891540  |
| H | 1.925713  | -1.821957 | 3.138396  |
| H | 3.511634  | -2.440941 | 3.588365  |
| H | 1.712095  | 2.309244  | -0.367939 |
| H | 1.508307  | 4.464204  | 0.744600  |
| H | 1.578421  | 3.172002  | 1.949470  |
| H | 2.991188  | 4.189395  | 1.659050  |
| H | 2.740686  | 4.248471  | -1.461152 |
| H | 3.699553  | 2.809370  | -1.828180 |
| H | 4.268227  | 3.966756  | -0.627869 |
| H | -2.396077 | -1.771291 | -1.720971 |
| H | -1.481836 | -2.628679 | -0.492053 |
| H | -2.799104 | 0.316947  | -2.467662 |
| H | -4.124545 | 2.342746  | -2.870056 |
| H | -4.725268 | 3.850553  | -1.030737 |
| H | -2.625589 | 1.318569  | 1.716840  |
| H | -2.575575 | -3.158121 | 1.736083  |
| H | -4.659186 | -3.930454 | 2.796058  |
| H | -6.836855 | -3.590968 | 1.658709  |
| H | -6.904103 | -2.471531 | -0.552458 |
| H | -4.821730 | -1.690465 | -1.609369 |
| H | -4.854760 | 5.043862  | 2.400601  |
| H | -4.270634 | 5.330836  | 0.744731  |
| H | -5.757838 | 4.378944  | 1.019584  |

B3LYP energy = -1507.78682900 a.u.

(5*S*,1'*R*)-**9b**, Conf. O

|   |           |           |           |
|---|-----------|-----------|-----------|
| C | -0.631677 | 1.289702  | 1.561250  |
| C | -1.660153 | 0.140469  | 1.351124  |
| N | -0.996805 | -0.651769 | 0.242802  |
| C | 0.144820  | -0.075468 | -0.089693 |
| N | 0.443151  | 0.998412  | 0.593119  |
| C | -2.049544 | -0.617617 | 2.653247  |

|   |           |           |           |                                                 |           |           |           |
|---|-----------|-----------|-----------|-------------------------------------------------|-----------|-----------|-----------|
| C | -3.094096 | -1.707881 | 2.357255  | H                                               | -3.168194 | 1.556443  | -3.278096 |
| C | -2.709264 | 0.428517  | 3.578110  | H                                               | -1.863392 | 0.374616  | -3.449092 |
| C | -0.843505 | -1.239395 | 3.371624  | H                                               | -3.525395 | -0.081038 | -3.824447 |
| C | 1.687110  | 1.813168  | 0.493330  | H                                               | -4.866817 | 1.349233  | -1.398142 |
| C | -1.603278 | -1.693380 | -0.569800 | H                                               | -4.755968 | 0.035113  | -0.220598 |
| C | -2.653855 | -1.343266 | -1.441145 | H                                               | -5.259024 | -0.302298 | -1.874244 |
| C | -3.262467 | -2.368477 | -2.166487 | H                                               | 2.545868  | 3.388008  | -0.657214 |
| C | -2.820932 | -3.678720 | -2.072278 | H                                               | 1.566778  | 2.298690  | -1.621690 |
| C | -1.740751 | -3.986579 | -1.260626 | H                                               | 2.959335  | 0.782277  | 2.642135  |
| C | -1.105261 | -3.009645 | -0.492081 | H                                               | 4.916569  | -0.717016 | 2.690774  |
| C | 0.109951  | -3.409501 | 0.336010  | H                                               | 6.005262  | -1.436537 | 0.611522  |
| C | -0.180441 | -4.584276 | 1.284482  | H                                               | 3.197287  | 0.859271  | -1.658731 |
| C | 1.310171  | -3.734666 | -0.572928 | H                                               | -0.679111 | 2.830231  | -2.149711 |
| C | -3.119318 | 0.089992  | -1.678663 | H                                               | -2.610307 | 4.356788  | -1.976615 |
| C | -2.903843 | 0.505142  | -3.145448 | H                                               | -2.598605 | 6.193767  | -0.311580 |
| C | -4.585149 | 0.302736  | -1.264793 | H                                               | -0.631602 | 6.496412  | 1.168239  |
| C | 1.608470  | 2.827142  | -0.668271 | H                                               | 1.294699  | 4.970372  | 0.995553  |
| C | 2.918103  | 0.917781  | 0.487981  | H                                               | 7.166507  | -1.054425 | -1.400153 |
| C | 3.422533  | 0.467268  | 1.714660  | H                                               | 6.103863  | -2.487595 | -1.498532 |
| C | 4.523700  | -0.374719 | 1.741422  | H                                               | 6.560213  | -1.610609 | -2.977700 |
| C | 5.145467  | -0.784460 | 0.563203  | B3LYP energy = -1507.78675002 a.u.              |           |           |           |
| C | 4.649400  | -0.332545 | -0.659250 | (5 <i>S</i> ,1' <i>R</i> )- <b>9b</b> , Conf. P |           |           |           |
| C | 3.537019  | 0.518672  | -0.689814 | C                                               | 0.695045  | -0.110210 | 1.981068  |
| C | 0.436058  | 3.776652  | -0.575803 | C                                               | -0.522335 | -1.048677 | 1.746079  |
| C | -0.672453 | 3.623784  | -1.410883 | N                                               | -0.955320 | -0.627281 | 0.357944  |
| C | -1.761749 | 4.486389  | -1.316027 | C                                               | -0.147134 | 0.317164  | -0.091914 |
| C | -1.755071 | 5.518586  | -0.383298 | N                                               | 0.820542  | 0.650497  | 0.722361  |
| C | -0.650860 | 5.686850  | 0.448984  | C                                               | -0.226863 | -2.557184 | 1.987244  |
| C | 0.434827  | 4.823060  | 0.351473  | C                                               | -1.494871 | -3.399238 | 1.765394  |
| O | 5.170582  | -0.655119 | -1.872514 | C                                               | 0.167851  | -2.685540 | 3.474695  |
| C | 6.319352  | -1.504137 | -1.923414 | C                                               | 0.916086  | -3.093892 | 1.113549  |
| H | -1.054711 | 2.270603  | 1.354824  | C                                               | 1.912991  | 1.628498  | 0.530781  |
| H | -0.209604 | 1.296919  | 2.564574  | C                                               | -2.226921 | -0.925966 | -0.280717 |
| H | -2.580647 | 0.549118  | 0.938895  | C                                               | -2.246690 | -1.720451 | -1.444204 |
| H | 0.778077  | -0.469254 | -0.871245 | C                                               | -3.490803 | -2.018127 | -2.002612 |
| H | -2.698953 | -2.503915 | 1.728933  | C                                               | -4.666396 | -1.549037 | -1.438175 |
| H | -3.975940 | -1.294005 | 1.863748  | C                                               | -4.617520 | -0.729604 | -0.321599 |
| H | -3.423147 | -2.158294 | 3.295667  | C                                               | -3.402919 | -0.378117 | 0.268975  |
| H | -3.573015 | 0.896218  | 3.099560  | C                                               | -3.417090 | 0.619974  | 1.422461  |
| H | -2.018529 | 1.218331  | 3.879744  | C                                               | -4.010331 | 1.968691  | 0.975744  |
| H | -3.058439 | -0.061771 | 4.488012  | C                                               | -4.164901 | 0.080760  | 2.653546  |
| H | -0.369696 | -2.016056 | 2.773818  | C                                               | -0.991486 | -2.220523 | -2.148738 |
| H | -0.083295 | -0.501499 | 3.634554  | C                                               | -1.000262 | -3.741957 | -2.367984 |
| H | -1.175389 | -1.701465 | 4.302835  | C                                               | -0.785349 | -1.484544 | -3.486149 |
| H | 1.699718  | 2.376721  | 1.426321  | C                                               | 1.720103  | 2.526239  | -0.705123 |
| H | -4.082717 | -2.132838 | -2.832203 | C                                               | 3.267554  | 0.931490  | 0.522382  |
| H | -3.306177 | -4.457255 | -2.647742 | C                                               | 4.224588  | 1.294717  | 1.462014  |
| H | -1.381729 | -5.006682 | -1.222486 | C                                               | 5.483942  | 0.692397  | 1.437133  |
| H | 0.397170  | -2.560783 | 0.954681  | C                                               | 5.786466  | -0.265602 | 0.487565  |
| H | 0.688122  | -4.773700 | 1.918420  | C                                               | 4.824773  | -0.636078 | -0.461318 |
| H | -1.033919 | -4.379374 | 1.932354  | C                                               | 3.564999  | -0.038074 | -0.442435 |
| H | -0.391400 | -5.503020 | 0.734781  | C                                               | 0.492995  | 3.416885  | -0.711673 |
| H | 2.189177  | -3.965521 | 0.032477  | C                                               | -0.323506 | 3.475822  | -1.843793 |
| H | 1.562428  | -2.898740 | -1.228618 | C                                               | -1.425564 | 4.326042  | -1.889454 |
| H | 1.100847  | -4.599531 | -1.205727 |                                                 |           |           |           |
| H | -2.505166 | 0.761464  | -1.079895 |                                                 |           |           |           |

|   |           |           |           |
|---|-----------|-----------|-----------|
| C | -1.727964 | 5.133485  | -0.798674 |
| C | -0.918956 | 5.088342  | 0.333708  |
| C | 0.182070  | 4.239673  | 0.375269  |
| O | 5.214503  | -1.583671 | -1.355324 |
| C | 4.304147  | -1.989769 | -2.375379 |
| H | 0.534020  | 0.584496  | 2.805374  |
| H | 1.617711  | -0.655608 | 2.164080  |
| H | -1.329606 | -0.777492 | 2.423121  |
| H | -0.299957 | 0.786836  | -1.050681 |
| H | -1.827279 | -3.390310 | 0.729133  |
| H | -2.320522 | -3.046181 | 2.386870  |
| H | -1.295026 | -4.436430 | 2.040541  |
| H | -0.624549 | -2.317080 | 4.130806  |
| H | 1.086753  | -2.146974 | 3.713902  |
| H | 0.336463  | -3.736215 | 3.715228  |
| H | 0.681589  | -3.034433 | 0.051534  |
| H | 1.856998  | -2.567322 | 1.283032  |
| H | 1.090585  | -4.144719 | 1.350282  |
| H | 1.878554  | 2.258521  | 1.421942  |
| H | -3.538610 | -2.627351 | -2.895773 |
| H | -5.620595 | -1.804895 | -1.881707 |
| H | -5.539390 | -0.335951 | 0.086674  |
| H | -2.389416 | 0.824358  | 1.721905  |
| H | -3.940770 | 2.694025  | 1.789120  |
| H | -3.477720 | 2.374208  | 0.113975  |
| H | -5.063490 | 1.871818  | 0.706297  |
| H | -4.108389 | 0.800016  | 3.473107  |
| H | -3.748486 | -0.865655 | 3.003179  |
| H | -5.220670 | -0.086075 | 2.431905  |
| H | -0.133801 | -1.989632 | -1.518005 |
| H | -0.054108 | -4.060698 | -2.810296 |
| H | -1.134888 | -4.284961 | -1.431580 |
| H | -1.798019 | -4.044794 | -3.048105 |
| H | 0.146093  | -1.807835 | -3.955866 |
| H | -0.741083 | -0.401541 | -3.350986 |
| H | -1.600355 | -1.695280 | -4.181218 |
| H | 2.616822  | 3.149807  | -0.745904 |
| H | 1.747988  | 1.921527  | -1.614500 |
| H | 3.997533  | 2.045211  | 2.209343  |
| H | 6.230801  | 0.974807  | 2.168393  |
| H | 6.757902  | -0.741688 | 0.457526  |
| H | 2.818225  | -0.319705 | -1.171714 |
| H | -0.087652 | 2.864113  | -2.708445 |
| H | -2.042526 | 4.359184  | -2.778913 |
| H | -2.582974 | 5.796979  | -0.831277 |
| H | -1.139999 | 5.722156  | 1.183689  |
| H | 0.809902  | 4.236340  | 1.258785  |
| H | 4.023344  | -1.148544 | -3.014555 |
| H | 4.834662  | -2.730440 | -2.967739 |
| H | 3.406886  | -2.445271 | -1.948002 |

B3LYP energy = -1507.78625130 a.u.

(5*S*,1'*S*)-**10a**, Conf. A

|   |          |          |          |
|---|----------|----------|----------|
| C | 3.898102 | 0.908331 | 0.571531 |
|---|----------|----------|----------|

|   |           |           |           |
|---|-----------|-----------|-----------|
| C | 5.094507  | 0.195016  | 0.604932  |
| C | 5.424727  | -0.654657 | -0.452190 |
| C | 4.546064  | -0.774796 | -1.535741 |
| C | 3.361966  | -0.061026 | -1.550296 |
| C | 3.011436  | 0.792826  | -0.496696 |
| C | 1.690485  | 1.542399  | -0.558998 |
| C | 1.736845  | 2.965349  | 0.030369  |
| C | 0.485537  | 3.779893  | -0.210749 |
| C | 0.138804  | 4.186014  | -1.503699 |
| C | -1.000645 | 4.950322  | -1.729744 |
| C | -1.813722 | 5.326152  | -0.663105 |
| C | -1.477225 | 4.933583  | 0.627734  |
| C | -0.336220 | 4.165963  | 0.849682  |
| N | 0.599379  | 0.743921  | 0.060662  |
| C | -0.351868 | 0.128814  | -0.593603 |
| N | -1.121278 | -0.659330 | 0.134880  |
| C | -2.354002 | -1.228737 | -0.385396 |
| C | -2.291119 | -2.383618 | -1.191248 |
| C | -0.988487 | -3.030285 | -1.646978 |
| C | -0.930887 | -4.533111 | -1.327379 |
| C | -0.753647 | -2.792996 | -3.150932 |
| C | -3.498004 | -2.929340 | -1.631949 |
| C | -4.715084 | -2.357819 | -1.296469 |
| C | -4.747521 | -1.192343 | -0.547407 |
| C | -3.574013 | -0.587020 | -0.095687 |
| C | -3.677002 | 0.758212  | 0.614926  |
| C | -4.264069 | 1.825937  | -0.326580 |
| C | -4.490797 | 0.675587  | 1.917000  |
| C | -0.698422 | -0.564410 | 1.587303  |
| C | -0.452286 | -1.881688 | 2.377287  |
| C | -0.052455 | -1.452258 | 3.806191  |
| C | 0.667397  | -2.747924 | 1.782063  |
| C | -1.747222 | -2.705503 | 2.480837  |
| C | 0.550891  | 0.357977  | 1.482860  |
| C | 7.508331  | -1.303077 | 0.543623  |
| O | 6.562516  | -1.391011 | -0.524145 |
| H | 3.679294  | 1.568839  | 1.400978  |
| H | 5.756109  | 0.317119  | 1.450191  |
| H | 4.815318  | -1.425451 | -2.357661 |
| H | 2.702926  | -0.159395 | -2.405516 |
| H | 1.404333  | 1.624193  | -1.607977 |
| H | 1.947715  | 2.924368  | 1.099893  |
| H | 2.595012  | 3.458659  | -0.431338 |
| H | 0.774458  | 3.920687  | -2.341709 |
| H | -1.247592 | 5.263261  | -2.736859 |
| H | -2.697580 | 5.926901  | -0.837458 |
| H | -2.096951 | 5.230862  | 1.464879  |
| H | -0.074155 | 3.881612  | 1.862842  |
| H | -0.507642 | 0.261785  | -1.654730 |
| H | -0.166160 | -2.553550 | -1.115222 |
| H | 0.053662  | -4.930153 | -1.582768 |
| H | -1.111445 | -4.728887 | -0.269562 |
| H | -1.669634 | -5.094617 | -1.901819 |
| H | 0.206995  | -3.215728 | -3.452728 |
| H | -0.749790 | -1.730106 | -3.401474 |
| H | -1.532034 | -3.269081 | -3.750556 |

|   |           |           |           |
|---|-----------|-----------|-----------|
| H | -3.483530 | -3.817735 | -2.249468 |
| H | -5.638360 | -2.808860 | -1.638372 |
| H | -5.701153 | -0.730480 | -0.326600 |
| H | -2.674134 | 1.096828  | 0.872542  |
| H | -4.261640 | 2.800663  | 0.164826  |
| H | -3.681165 | 1.910001  | -1.245604 |
| H | -5.293926 | 1.591256  | -0.601690 |
| H | -4.496351 | 1.645526  | 2.418532  |
| H | -4.079752 | -0.061779 | 2.608861  |
| H | -5.528317 | 0.400468  | 1.718186  |
| H | -1.496202 | -0.034308 | 2.106664  |
| H | 0.889921  | -0.901429 | 3.830246  |
| H | -0.824392 | -0.831970 | 4.267915  |
| H | 0.075481  | -2.339495 | 4.428123  |
| H | 0.434848  | -3.080324 | 0.772304  |
| H | 0.798203  | -3.639671 | 2.397363  |
| H | 1.629901  | -2.233790 | 1.756318  |
| H | -2.080497 | -3.084394 | 1.516390  |
| H | -2.559320 | -2.117870 | 2.914086  |
| H | -1.577810 | -3.563926 | 3.133499  |
| H | 0.460572  | 1.242497  | 2.109499  |
| H | 1.472053  | -0.160425 | 1.740931  |
| H | 7.071430  | -1.638842 | 1.487367  |
| H | 8.325615  | -1.964122 | 0.268258  |
| H | 7.886476  | -0.283799 | 0.653858  |

B3LYP energy = -1507.78868219 a.u.

(5S,1'S)-10a, Conf. B

|   |           |           |           |
|---|-----------|-----------|-----------|
| C | -3.821458 | 1.135705  | -0.861398 |
| C | -5.045894 | 0.503260  | -0.989517 |
| C | -5.517572 | -0.336651 | 0.025713  |
| C | -4.740356 | -0.531260 | 1.169679  |
| C | -3.509716 | 0.109850  | 1.279220  |
| C | -3.027289 | 0.948744  | 0.276622  |
| C | -1.672091 | 1.613374  | 0.450188  |
| C | -1.600963 | 3.056174  | -0.088155 |
| C | -0.318612 | 3.785089  | 0.243032  |
| C | 0.563371  | 4.176410  | -0.765856 |
| C | 1.732422  | 4.870915  | -0.464151 |
| C | 2.036850  | 5.183628  | 0.856144  |
| C | 1.164056  | 4.801218  | 1.871980  |
| C | -0.003304 | 4.109814  | 1.566356  |
| N | -0.592023 | 0.771924  | -0.130187 |
| C | 0.315726  | 0.126990  | 0.555457  |
| N | 1.088916  | -0.679892 | -0.148501 |
| C | 2.287303  | -1.285364 | 0.409399  |
| C | 2.164218  | -2.427843 | 1.225821  |
| C | 0.829471  | -3.026211 | 1.654557  |
| C | 0.727287  | -4.527664 | 1.339880  |
| C | 0.569912  | -2.774727 | 3.152214  |
| C | 3.339668  | -3.010226 | 1.703014  |
| C | 4.584181  | -2.486156 | 1.392002  |
| C | 4.676128  | -1.331810 | 0.630895  |
| C | 3.536528  | -0.690395 | 0.143368  |
| C | 3.707244  | 0.642098  | -0.578306 |

|   |           |           |           |
|---|-----------|-----------|-----------|
| C | 4.320064  | 1.695372  | 0.363156  |
| C | 4.542085  | 0.512696  | -1.863402 |
| C | 0.714991  | -0.577757 | -1.613313 |
| C | 0.432806  | -1.891266 | -2.397581 |
| C | 1.692883  | -2.771522 | -2.456777 |
| C | 0.091181  | -1.460914 | -3.841097 |
| C | -0.739368 | -2.700552 | -1.824103 |
| C | -0.493953 | 0.401663  | -1.554034 |
| C | -7.283850 | -1.754444 | 0.817908  |
| O | -6.730753 | -0.905610 | -0.189921 |
| H | -3.494914 | 1.788624  | -1.660672 |
| H | -5.659006 | 0.653414  | -1.868614 |
| H | -5.080654 | -1.165531 | 1.975223  |
| H | -2.921524 | -0.047235 | 2.177143  |
| H | -1.451259 | 1.643212  | 1.517757  |
| H | -1.757280 | 3.065360  | -1.167513 |
| H | -2.451840 | 3.585244  | 0.347216  |
| H | 0.326331  | 3.954819  | -1.800659 |
| H | 2.399377  | 5.174170  | -1.261924 |
| H | 2.942365  | 5.728222  | 1.092733  |
| H | 1.386669  | 5.052764  | 2.901740  |
| H | -0.684422 | 3.838478  | 2.365611  |
| H | 0.435893  | 0.251969  | 1.622080  |
| H | 0.036096  | -2.524038 | 1.102291  |
| H | -0.276160 | -4.889622 | 1.573226  |
| H | 0.926223  | -4.734910 | 0.287618  |
| H | 1.432423  | -5.110969 | 1.934430  |
| H | -0.412571 | -3.159631 | 3.433770  |
| H | 0.601541  | -1.711821 | 3.400233  |
| H | 1.315916  | -3.278054 | 3.770378  |
| H | 3.278318  | -3.890559 | 2.329203  |
| H | 5.482122  | -2.965289 | 1.761967  |
| H | 5.650638  | -0.906369 | 0.429009  |
| H | 2.724321  | 1.019161  | -0.858267 |
| H | 4.355519  | 2.666131  | -0.134579 |
| H | 3.730806  | 1.805219  | 1.275277  |
| H | 5.338488  | 1.428047  | 0.650500  |
| H | 4.603276  | 1.477794  | -2.370535 |
| H | 4.111265  | -0.209223 | -2.559674 |
| H | 5.561258  | 0.190573  | -1.641444 |
| H | 1.551838  | -0.091326 | -2.112817 |
| H | 2.541954  | -2.223074 | -2.869931 |
| H | 1.981173  | -3.156620 | -1.480318 |
| H | 1.505601  | -3.627123 | -3.108220 |
| H | -0.830988 | -0.879322 | -3.898012 |
| H | -0.047924 | -2.348685 | -4.459794 |
| H | 0.897101  | -0.870637 | -4.283703 |
| H | -1.676461 | -2.141014 | -1.824313 |
| H | -0.545706 | -3.035475 | -0.806859 |
| H | -0.898207 | -3.589857 | -2.436418 |
| H | -0.331173 | 1.289412  | -2.162055 |
| H | -1.424975 | -0.067263 | -1.864621 |
| H | -8.247241 | -2.078420 | 0.433483  |
| H | -6.650061 | -2.627548 | 0.991748  |
| H | -7.430064 | -1.211749 | 1.754987  |

B3LYP energy = -1507.78850967 a.u.

(5S,1'S)-10a, Conf. C

|   |           |           |           |
|---|-----------|-----------|-----------|
| C | 3.612749  | 0.725983  | 1.130481  |
| C | 4.484298  | 1.795970  | 0.935170  |
| C | 4.318544  | 2.624012  | -0.175117 |
| C | 3.277691  | 2.365911  | -1.077545 |
| C | 2.426663  | 1.296432  | -0.870606 |
| C | 2.580430  | 0.456271  | 0.239145  |
| C | 1.667776  | -0.736318 | 0.462080  |
| C | 1.792412  | -1.833518 | -0.616612 |
| C | 3.147396  | -2.506119 | -0.600331 |
| C | 3.434200  | -3.486393 | 0.353461  |
| C | 4.678293  | -4.107658 | 0.383435  |
| C | 5.654513  | -3.758551 | -0.545884 |
| C | 5.377358  | -2.787864 | -1.503328 |
| C | 4.131833  | -2.166629 | -1.529407 |
| N | 0.261558  | -0.290688 | 0.611486  |
| C | -0.748750 | -0.489253 | -0.194515 |
| N | -1.898415 | 0.019960  | 0.213294  |
| C | -3.058169 | 0.125485  | -0.656243 |
| C | -3.838114 | -1.019114 | -0.916665 |
| C | -3.475713 | -2.417528 | -0.432101 |
| C | -4.628624 | -3.109621 | 0.312308  |
| C | -2.991106 | -3.289668 | -1.605907 |
| C | -4.972100 | -0.860420 | -1.714743 |
| C | -5.320345 | 0.374896  | -2.237726 |
| C | -4.507725 | 1.474504  | -2.011009 |
| C | -3.348613 | 1.374260  | -1.240344 |
| C | -2.436547 | 2.592386  | -1.135313 |
| C | -1.899125 | 2.996522  | -2.520631 |
| C | -3.126149 | 3.783564  | -0.450146 |
| C | -1.703243 | 0.706695  | 1.548126  |
| C | -2.569305 | 0.210365  | 2.742888  |
| C | -2.322856 | -1.266090 | 3.086330  |
| C | -4.064214 | 0.439387  | 2.461767  |
| C | -2.181369 | 1.087721  | 3.953050  |
| C | -0.170399 | 0.536266  | 1.754692  |
| C | 6.196964  | 4.001331  | 0.398631  |
| O | 5.102251  | 3.693800  | -0.466824 |
| H | 3.755886  | 0.090101  | 1.996642  |
| H | 5.277900  | 1.968602  | 1.647375  |
| H | 3.160094  | 3.014311  | -1.936180 |
| H | 1.635436  | 1.117105  | -1.589865 |
| H | 1.924793  | -1.183953 | 1.424638  |
| H | 1.020299  | -2.587053 | -0.439126 |
| H | 1.613962  | -1.403652 | -1.604066 |
| H | 2.675679  | -3.774878 | 1.073044  |
| H | 4.882561  | -4.869249 | 1.126021  |
| H | 6.622209  | -4.244298 | -0.526994 |
| H | 6.129325  | -2.514969 | -2.233472 |
| H | 3.924650  | -1.412452 | -2.279424 |
| H | -0.660799 | -1.017728 | -1.131198 |
| H | -2.646328 | -2.332166 | 0.268634  |
| H | -4.293512 | -4.072070 | 0.704273  |
| H | -4.987088 | -2.510177 | 1.150263  |

|   |           |           |           |
|---|-----------|-----------|-----------|
| H | -5.475445 | -3.301771 | -0.348485 |
| H | -2.660423 | -4.264634 | -1.241620 |
| H | -2.159514 | -2.826479 | -2.141478 |
| H | -3.792647 | -3.456619 | -2.328277 |
| H | -5.592252 | -1.720737 | -1.929660 |
| H | -6.213394 | 0.475772  | -2.841827 |
| H | -4.765029 | 2.424915  | -2.460334 |
| H | -1.564798 | 2.327391  | -0.537731 |
| H | -1.186798 | 3.818061  | -2.419632 |
| H | -1.390778 | 2.163306  | -3.009849 |
| H | -2.701874 | 3.331688  | -3.179818 |
| H | -2.425791 | 4.614426  | -0.343677 |
| H | -3.495923 | 3.521701  | 0.542785  |
| H | -3.975719 | 4.138992  | -1.036064 |
| H | -1.940279 | 1.758554  | 1.402877  |
| H | -2.622622 | -1.930393 | 2.277127  |
| H | -1.277348 | -1.472420 | 3.324154  |
| H | -2.909861 | -1.538302 | 3.965053  |
| H | -4.269971 | 1.486497  | 2.228869  |
| H | -4.644721 | 0.178851  | 3.348674  |
| H | -4.431440 | -0.166695 | 1.636157  |
| H | -2.339052 | 2.148116  | 3.742123  |
| H | -1.142035 | 0.951985  | 4.257566  |
| H | -2.806155 | 0.822720  | 4.807185  |
| H | 0.364503  | 1.484890  | 1.738426  |
| H | 0.073371  | 0.018332  | 2.680071  |
| H | 6.911998  | 3.176048  | 0.439105  |
| H | 6.677245  | 4.875417  | -0.032886 |
| H | 5.849757  | 4.238315  | 1.407397  |

B3LYP energy = -1507.78785478 a.u.

(5S,1'S)-10a, Conf. D

|   |           |           |           |
|---|-----------|-----------|-----------|
| C | 2.488857  | 1.353864  | -0.587136 |
| C | 3.350026  | 2.443546  | -0.668943 |
| C | 4.363023  | 2.596892  | 0.282060  |
| C | 4.492553  | 1.652519  | 1.305347  |
| C | 3.623296  | 0.576692  | 1.372846  |
| C | 2.608454  | 0.407435  | 0.427539  |
| C | 1.684169  | -0.794773 | 0.502822  |
| C | 1.842011  | -1.786768 | -0.669872 |
| C | 3.193909  | -2.465454 | -0.676046 |
| C | 3.432011  | -3.565447 | 0.152094  |
| C | 4.672344  | -4.195037 | 0.159821  |
| C | 5.693690  | -3.733681 | -0.666237 |
| C | 5.465736  | -2.641844 | -1.497963 |
| C | 4.223974  | -2.012977 | -1.501957 |
| N | 0.274946  | -0.355585 | 0.643649  |
| C | -0.711556 | -0.488282 | -0.204156 |
| N | -1.876026 | -0.024237 | 0.215334  |
| C | -3.006666 | 0.157548  | -0.679400 |
| C | -3.785521 | -0.956531 | -1.050794 |
| C | -3.452874 | -2.391555 | -0.658776 |
| C | -4.636638 | -3.122646 | -0.005520 |
| C | -2.937959 | -3.183587 | -1.875490 |
| C | -4.890581 | -0.725109 | -1.871562 |



|   |           |           |           |
|---|-----------|-----------|-----------|
| C | -5.211453 | 0.550041  | -2.310000 |
| C | -4.398424 | 1.621390  | -1.974451 |
| C | -3.266734 | 1.449766  | -1.176502 |
| C | -2.341216 | 2.642125  | -0.954542 |
| C | -1.710235 | 3.094094  | -2.284862 |
| C | -3.046498 | 3.816582  | -0.257536 |
| C | -1.720612 | 0.554366  | 1.605439  |
| C | -2.620739 | -0.031373 | 2.732064  |
| C | -2.377494 | -1.527351 | 2.977506  |
| C | -4.106505 | 0.212741  | 2.417547  |
| C | -2.278277 | 0.758625  | 4.013888  |
| C | -0.192905 | 0.371802  | 1.840074  |
| C | 5.180381  | 4.613778  | -0.727428 |
| O | 5.256370  | 3.619720  | 0.295747  |
| H | 1.714434  | 1.255949  | -1.339717 |
| H | 3.225955  | 3.156459  | -1.471018 |
| H | 5.280168  | 1.778442  | 2.036824  |
| H | 3.741197  | -0.146562 | 2.171336  |
| H | 1.904540  | -1.335042 | 1.426425  |
| H | 1.064475  | -2.550581 | -0.586195 |
| H | 1.693500  | -1.265405 | -1.617707 |
| H | 2.638204  | -3.940412 | 0.789064  |
| H | 4.838487  | -5.050064 | 0.803608  |
| H | 6.658510  | -4.225416 | -0.665075 |
| H | 6.253590  | -2.279900 | -2.147047 |
| H | 4.055253  | -1.163893 | -2.153674 |
| H | -0.594980 | -0.929217 | -1.182578 |
| H | -2.645464 | -2.368450 | 0.071833  |
| H | -4.320939 | -4.111274 | 0.333759  |
| H | -5.023485 | -2.577442 | 0.856307  |
| H | -5.458954 | -3.264954 | -0.708660 |
| H | -2.649896 | -4.193081 | -1.574744 |
| H | -2.069700 | -2.706343 | -2.335012 |
| H | -3.708895 | -3.269820 | -2.643901 |
| H | -5.510651 | -1.559543 | -2.172222 |
| H | -6.083500 | 0.705370  | -2.932977 |
| H | -4.633229 | 2.605935  | -2.357861 |
| H | -1.515407 | 2.329512  | -0.316623 |
| H | -0.996255 | 3.900851  | -2.106018 |
| H | -1.182438 | 2.272678  | -2.773584 |
| H | -2.466006 | 3.465235  | -2.979305 |
| H | -2.336074 | 4.624647  | -0.071616 |
| H | -3.480375 | 3.519132  | 0.698813  |
| H | -3.850926 | 4.219262  | -0.875498 |
| H | -1.958226 | 1.614076  | 1.536659  |
| H | -2.609428 | -2.129909 | 2.100135  |
| H | -1.349010 | -1.741495 | 3.274774  |
| H | -3.020962 | -1.871966 | 3.788793  |
| H | -4.306834 | 1.271392  | 2.239492  |
| H | -4.713866 | -0.099902 | 3.268783  |
| H | -4.446226 | -0.344280 | 1.546951  |
| H | -2.441187 | 1.830104  | 3.875460  |
| H | -1.246905 | 0.609434  | 4.337986  |
| H | -2.924756 | 0.426727  | 4.827602  |
| H | 0.336585  | 1.320807  | 1.914742  |
| H | 0.030154  | -0.218306 | 2.726586  |

|   |          |          |           |
|---|----------|----------|-----------|
| H | 4.224585 | 5.142953 | -0.695221 |
| H | 5.986697 | 5.312194 | -0.520250 |
| H | 5.325550 | 4.174740 | -1.717530 |

B3LYP energy = -1507.78755569 a.u.

(5S,1'S)-**10a**, Conf. E

|   |           |           |           |
|---|-----------|-----------|-----------|
| C | -2.819910 | -1.129501 | 1.116998  |
| C | -3.614458 | -2.272316 | 1.089667  |
| C | -4.161829 | -2.700157 | -0.121314 |
| C | -3.906021 | -1.967974 | -1.286771 |
| C | -3.119161 | -0.831034 | -1.238749 |
| C | -2.555506 | -0.391624 | -0.034246 |
| C | -1.666605 | 0.834498  | 0.053337  |
| C | -2.175661 | 2.081696  | -0.703418 |
| C | -3.433255 | 2.657285  | -0.089559 |
| C | -3.363321 | 3.385972  | 1.101629  |
| C | -4.510007 | 3.918065  | 1.681220  |
| C | -5.749328 | 3.731879  | 1.074225  |
| C | -5.830766 | 3.013543  | -0.114035 |
| C | -4.680568 | 2.480953  | -0.690229 |
| N | -0.275050 | 0.516074  | -0.368590 |
| C | 0.761124  | 0.476398  | 0.427218  |
| N | 1.887434  | 0.068945  | -0.130984 |
| C | 3.180406  | 0.247795  | 0.509757  |
| C | 3.605085  | -0.674028 | 1.486700  |
| C | 2.731528  | -1.801867 | 2.023440  |
| C | 3.416622  | -3.176006 | 1.950497  |
| C | 2.285075  | -1.500833 | 3.466966  |
| C | 4.878288  | -0.495390 | 2.030777  |
| C | 5.693155  | 0.553674  | 1.635133  |
| C | 5.228545  | 1.480940  | 0.715581  |
| C | 3.958231  | 1.365815  | 0.149705  |
| C | 3.458390  | 2.484912  | -0.757983 |
| C | 3.327493  | 3.802945  | 0.027437  |
| C | 4.339820  | 2.671402  | -2.003707 |
| C | 1.644968  | -0.216328 | -1.598134 |
| C | 2.060996  | -1.612184 | -2.144847 |
| C | 1.703773  | -1.610119 | -3.646800 |
| C | 1.329775  | -2.770817 | -1.451996 |
| C | 3.582111  | -1.807175 | -2.022477 |
| C | 0.124039  | 0.094748  | -1.725315 |
| C | -5.268693 | -4.576043 | 0.884312  |
| O | -4.949849 | -3.795361 | -0.269320 |
| H | -2.408413 | -0.807494 | 2.067297  |
| H | -3.802110 | -2.809048 | 2.008306  |
| H | -4.342600 | -2.302636 | -2.218890 |
| H | -2.957519 | -0.280728 | -2.157325 |
| H | -1.574789 | 1.103875  | 1.105803  |
| H | -1.381340 | 2.831828  | -0.676131 |
| H | -2.352188 | 1.842966  | -1.752898 |
| H | -2.401773 | 3.550776  | 1.576055  |
| H | -4.435393 | 4.484776  | 2.601304  |
| H | -6.643093 | 4.148324  | 1.521981  |
| H | -6.789629 | 2.868548  | -0.596418 |
| H | -4.756860 | 1.926384  | -1.617802 |

|   |           |           |           |   |           |           |           |
|---|-----------|-----------|-----------|---|-----------|-----------|-----------|
| H | 0.706248  | 0.767227  | 1.467042  | C | 2.662656  | 0.367823  | 2.605067  |
| H | 1.830384  | -1.857032 | 1.413807  | C | 3.666051  | -0.262015 | 3.584884  |
| H | 2.721371  | -3.954927 | 2.270386  | C | 1.891437  | 1.513634  | 3.286788  |
| H | 3.745058  | -3.412706 | 0.937534  | C | 4.391198  | 1.740601  | 1.405092  |
| H | 4.288315  | -3.225963 | 2.605412  | C | 4.994400  | 2.259466  | 0.270407  |
| H | 1.608060  | -2.280306 | 3.822735  | C | 4.504316  | 1.931711  | -0.983794 |
| H | 1.768430  | -0.541479 | 3.541166  | C | 3.420765  | 1.065421  | -1.136113 |
| H | 3.141311  | -1.465575 | 4.143417  | C | 2.860623  | 0.841696  | -2.537738 |
| H | 5.235983  | -1.189151 | 2.780285  | C | 2.368386  | 2.164535  | -3.153230 |
| H | 6.682330  | 0.662197  | 2.062268  | C | 3.875722  | 0.156870  | -3.468114 |
| H | 5.855209  | 2.322252  | 0.448682  | C | 1.859747  | -1.825805 | -0.751678 |
| H | 2.455368  | 2.235056  | -1.101844 | C | 2.643152  | -2.938967 | 0.002164  |
| H | 2.900195  | 4.579722  | -0.610205 | C | 4.122307  | -2.546650 | 0.157260  |
| H | 2.679766  | 3.682048  | 0.898184  | C | 2.582766  | -4.194190 | -0.895111 |
| H | 4.298315  | 4.156411  | 0.379114  | C | 2.045014  | -3.272080 | 1.376987  |
| H | 3.920391  | 3.445064  | -2.650104 | C | 0.351214  | -2.140743 | -0.973253 |
| H | 4.420321  | 1.750514  | -2.584478 | C | -3.836346 | 5.395365  | -0.499764 |
| H | 5.351103  | 2.979549  | -1.732491 | O | -3.456045 | 4.510966  | 0.557069  |
| H | 2.216177  | 0.521023  | -2.159640 | H | -2.099967 | 0.509033  | 1.982919  |
| H | 0.629793  | -1.524136 | -3.821644 | H | -2.794879 | 2.835254  | 2.332238  |
| H | 2.202944  | -0.793835 | -4.174414 | H | -3.285891 | 3.330152  | -1.903048 |
| H | 2.031873  | -2.547266 | -4.098883 | H | -2.583928 | 1.019440  | -2.251593 |
| H | 1.556521  | -2.818670 | -0.387970 | H | -2.107281 | -1.084131 | -1.472274 |
| H | 1.646063  | -3.716084 | -1.896206 | H | -2.028234 | -2.871660 | 0.271767  |
| H | 0.245614  | -2.711971 | -1.565835 | H | -2.282181 | -1.668923 | 1.518703  |
| H | 3.912645  | -1.857639 | -0.986976 | H | -3.787310 | -3.083188 | -1.611603 |
| H | 4.129268  | -0.998552 | -2.512026 | H | -6.210889 | -3.276756 | -1.996901 |
| H | 3.868504  | -2.741527 | -2.508597 | H | -7.813657 | -2.348462 | -0.347304 |
| H | -0.077071 | 0.894449  | -2.436110 | H | -6.961536 | -1.227741 | 1.693474  |
| H | -0.453488 | -0.780302 | -2.012797 | H | -4.536534 | -1.024572 | 2.074136  |
| H | -4.368432 | -5.000005 | 1.336140  | H | 0.232074  | 0.870655  | 0.400038  |
| H | -5.809459 | -3.982920 | 1.625725  | H | 1.935404  | -0.401800 | 2.350119  |
| H | -5.907288 | -5.380040 | 0.528495  | H | 3.136664  | -0.662767 | 4.451704  |

B3LYP energy = -1507.78713539 a.u.

(5S,1'S)-10a, Conf. F

|   |           |           |           |   |          |           |           |
|---|-----------|-----------|-----------|---|----------|-----------|-----------|
| C | -2.347831 | 1.116379  | 1.120972  | H | 4.224661 | -1.077578 | 3.123660  |
| C | -2.737999 | 2.426491  | 1.331746  | H | 4.386319 | 0.471669  | 3.951015  |
| C | -3.080401 | 3.245099  | 0.248106  | H | 1.377771 | 1.145063  | 4.177291  |
| C | -3.020138 | 2.727260  | -1.046998 | H | 1.145371 | 1.952942  | 2.621370  |
| C | -2.618669 | 1.408355  | -1.240359 | H | 2.568113 | 2.312451  | 3.596849  |
| C | -2.276775 | 0.581817  | -0.172580 | H | 4.757362 | 2.033444  | 2.380292  |
| C | -1.841188 | -0.842453 | -0.440397 | H | 5.834015 | 2.936931  | 0.364372  |
| C | -2.493683 | -1.905177 | 0.475284  | H | 4.956728 | 2.374827  | -1.861464 |
| C | -3.985336 | -2.027044 | 0.254397  | H | 1.986157 | 0.194994  | -2.468150 |
| C | -4.478446 | -2.663140 | -0.888743 | H | 1.900824 | 1.973931  | -4.121571 |
| C | -5.847188 | -2.776874 | -1.107468 | H | 1.634738 | 2.654814  | -2.510803 |
| C | -6.747475 | -2.258186 | -0.180415 | H | 3.192162 | 2.862016  | -3.314078 |
| C | -6.268664 | -1.629021 | 0.964041  | H | 3.427102 | -0.025772 | -4.446737 |
| C | -4.897764 | -1.514627 | 1.177969  | H | 4.216312 | -0.799319 | -3.066671 |
| N | -0.355030 | -0.976216 | -0.402322 | H | 4.756387 | 0.783985  | -3.618731 |
| C | 0.518594  | -0.094137 | 0.008859  | H | 2.353719 | -1.696644 | -1.713141 |
| N | 1.783528  | -0.458773 | -0.110360 | H | 4.574609 | -2.307949 | -0.807554 |
| C | 2.872303  | 0.494554  | 0.029373  | H | 4.260485 | -1.690021 | 0.813606  |
| C | 3.319403  | 0.850745  | 1.317128  | H | 4.676894 | -3.384412 | 0.583835  |
|   |           |           |           | H | 1.565834 | -4.567394 | -1.030806 |
|   |           |           |           | H | 3.163426 | -4.995805 | -0.436440 |
|   |           |           |           | H | 3.009081 | -3.997920 | -1.881768 |
|   |           |           |           | H | 1.017399 | -3.634795 | 1.310047  |

|   |           |           |           |
|---|-----------|-----------|-----------|
| H | 2.058182  | -2.415665 | 2.049827  |
| H | 2.631553  | -4.064018 | 1.845671  |
| H | 0.093036  | -2.234519 | -2.028220 |
| H | 0.044837  | -3.048991 | -0.461652 |
| H | -4.705519 | 5.013531  | -1.040408 |
| H | -4.093613 | 6.334991  | -0.018513 |
| H | -3.009845 | 5.557601  | -1.195891 |

B3LYP energy = -1507.78707965 a.u.

(5S,1'S)-10a, Conf. G

|   |           |           |           |
|---|-----------|-----------|-----------|
| C | -2.413527 | 1.301596  | 0.800090  |
| C | -2.797851 | 2.639487  | 0.846881  |
| C | -3.075652 | 3.320825  | -0.340225 |
| C | -2.961601 | 2.646176  | -1.561800 |
| C | -2.575231 | 1.318959  | -1.588646 |
| C | -2.292428 | 0.619469  | -0.408872 |
| C | -1.855071 | -0.827575 | -0.492016 |
| C | -2.483955 | -1.766746 | 0.564058  |
| C | -3.968908 | -1.965584 | 0.355279  |
| C | -4.429547 | -2.758564 | -0.699865 |
| C | -5.791383 | -2.945703 | -0.910404 |
| C | -6.717485 | -2.343823 | -0.062414 |
| C | -6.271064 | -1.558147 | 0.995041  |
| C | -4.906814 | -1.370665 | 1.200499  |
| N | -0.368784 | -0.950374 | -0.463474 |
| C | 0.502252  | -0.080198 | -0.024493 |
| N | 1.765299  | -0.463028 | -0.103428 |
| C | 2.864080  | 0.472886  | 0.069832  |
| C | 3.272185  | 0.827100  | 1.371192  |
| C | 2.565901  | 0.357574  | 2.637935  |
| C | 3.524448  | -0.293934 | 3.647963  |
| C | 1.797715  | 1.517710  | 3.298626  |
| C | 4.355729  | 1.698494  | 1.493241  |
| C | 5.007679  | 2.201091  | 0.378369  |
| C | 4.556838  | 1.875377  | -0.891057 |
| C | 3.464246  | 1.027382  | -1.077991 |
| C | 2.949874  | 0.806200  | -2.497649 |
| C | 2.492544  | 2.133302  | -3.130846 |
| C | 3.987185  | 0.106594  | -3.391536 |
| C | 1.841323  | -1.835330 | -0.735843 |
| C | 2.583624  | -2.956850 | 0.046611  |
| C | 4.063517  | -2.587309 | 0.245084  |
| C | 2.529951  | -4.215142 | -0.846903 |
| C | 1.938871  | -3.274962 | 1.404018  |
| C | 0.336499  | -2.128141 | -1.005041 |
| C | -3.618003 | 5.362673  | 0.797781  |
| O | -3.462477 | 4.618656  | -0.412677 |
| H | -2.213250 | 0.797146  | 1.737284  |
| H | -2.885163 | 3.129834  | 1.805447  |
| H | -3.188944 | 3.179196  | -2.475846 |
| H | -2.500460 | 0.811455  | -2.543555 |
| H | -2.133008 | -1.202885 | -1.479337 |
| H | -1.984778 | -2.736274 | 0.504168  |
| H | -2.287993 | -1.378341 | 1.564239  |
| H | -3.717294 | -3.243345 | -1.358937 |

|   |           |           |           |
|---|-----------|-----------|-----------|
| H | -6.129410 | -3.566303 | -1.731275 |
| H | -7.778368 | -2.490336 | -0.222895 |
| H | -6.984217 | -1.090406 | 1.662729  |
| H | -4.571563 | -0.757294 | 2.028498  |
| H | 0.215586  | 0.889155  | 0.355570  |
| H | 1.831475  | -0.396778 | 2.359391  |
| H | 2.959034  | -0.686135 | 4.495778  |
| H | 4.081593  | -1.119475 | 3.203194  |
| H | 4.246632  | 0.424648  | 4.039516  |
| H | 1.251637  | 1.158188  | 4.173414  |
| H | 1.080100  | 1.972848  | 2.612881  |
| H | 2.480668  | 2.302648  | 3.629668  |
| H | 4.693106  | 1.988939  | 2.479556  |
| H | 5.855387  | 2.864082  | 0.499106  |
| H | 5.048323  | 2.305820  | -1.753962 |
| H | 2.066752  | 0.168782  | -2.457031 |
| H | 2.059690  | 1.946810  | -4.115910 |
| H | 1.739489  | 2.630081  | -2.516372 |
| H | 3.328016  | 2.823262  | -3.260260 |
| H | 3.568304  | -0.076081 | -4.383254 |
| H | 4.303178  | -0.851386 | -2.974338 |
| H | 4.879453  | 0.722710  | -3.516889 |
| H | 2.366893  | -1.717580 | -1.681867 |
| H | 4.548552  | -2.359238 | -0.706459 |
| H | 4.195163  | -1.730235 | 0.902250  |
| H | 4.591850  | -3.431813 | 0.691256  |
| H | 1.511371  | -4.571805 | -1.011717 |
| H | 3.082553  | -5.024100 | -0.366971 |
| H | 2.989181  | -4.030878 | -1.820986 |
| H | 0.906471  | -3.617361 | 1.308593  |
| H | 1.950047  | -2.417751 | 2.075763  |
| H | 2.495815  | -4.077515 | 1.890427  |
| H | 0.111178  | -2.222485 | -2.067316 |
| H | -0.003654 | -3.028718 | -0.500561 |
| H | -2.673092 | 5.435114  | 1.341999  |
| H | -3.936461 | 6.355969  | 0.493313  |
| H | -4.381269 | 4.917053  | 1.440048  |

B3LYP energy = -1507.78706555 a.u.

(5S,1'S)-10a, Conf. H

|   |           |           |           |
|---|-----------|-----------|-----------|
| C | -2.715099 | -1.017751 | 1.409719  |
| C | -3.476091 | -2.164951 | 1.540024  |
| C | -4.093679 | -2.728918 | 0.417675  |
| C | -3.940663 | -2.116133 | -0.827547 |
| C | -3.173928 | -0.958507 | -0.938235 |
| C | -2.544827 | -0.392190 | 0.168426  |
| C | -1.670218 | 0.845247  | 0.075764  |
| C | -2.217772 | 1.991366  | -0.803645 |
| C | -3.438775 | 2.649819  | -0.199099 |
| C | -4.724083 | 2.360446  | -0.659860 |
| C | -5.839440 | 2.965430  | -0.087035 |
| C | -5.684556 | 3.870243  | 0.958152  |
| C | -4.407135 | 4.171302  | 1.423078  |
| C | -3.295170 | 3.567026  | 0.846353  |
| N | -0.290454 | 0.489151  | -0.356587 |

|   |           |           |           |                                                  |           |           |           |
|---|-----------|-----------|-----------|--------------------------------------------------|-----------|-----------|-----------|
| C | 0.768941  | 0.515173  | 0.409060  | H                                                | 4.055376  | -1.155758 | -2.523112 |
| N | 1.877205  | 0.053564  | -0.143512 | H                                                | 3.823122  | -2.897610 | -2.391103 |
| C | 3.185663  | 0.281323  | 0.449521  | H                                                | 3.908434  | -1.911278 | -0.935885 |
| C | 3.943413  | 1.383840  | 0.007243  | H                                                | 2.063477  | -1.088833 | -4.125237 |
| C | 3.417084  | 2.441169  | -0.958076 | H                                                | 0.521448  | -1.826990 | -3.665174 |
| C | 3.256158  | 3.796503  | -0.244500 | H                                                | 1.936974  | -2.836157 | -3.923341 |
| C | 4.294037  | 2.584550  | -2.212560 | H                                                | -0.171939 | 0.657431  | -2.457934 |
| C | 5.222194  | 1.546806  | 0.541513  | H                                                | -0.513103 | -0.968593 | -1.850418 |
| C | 5.715499  | 0.682011  | 1.505853  | H                                                | -5.980317 | -5.351355 | -0.047487 |
| C | 4.922244  | -0.351801 | 1.977479  | H                                                | -6.213871 | -3.815677 | -0.913918 |
| C | 3.641399  | -0.576702 | 1.469800  | H                                                | -4.757602 | -4.806491 | -1.219261 |
| C | 2.795244  | -1.684042 | 2.087081  | B3LYP energy = -1507.78701487 a.u.               |           |           |           |
| C | 3.498457  | -3.051027 | 2.070565  | (5 <i>S</i> ,1' <i>S</i> )- <b>10a</b> , Conf. I |           |           |           |
| C | 2.377318  | -1.312983 | 3.522533  | C                                                | 3.193161  | 1.349645  | -1.367472 |
| C | 1.592943  | -0.345284 | -1.576994 | C                                                | 4.482398  | 0.858722  | -1.285768 |
| C | 2.012092  | -1.770196 | -2.039373 | C                                                | 5.081819  | 0.661811  | -0.035101 |
| C | 1.322805  | -2.891498 | -1.248589 | C                                                | 4.366177  | 0.971034  | 1.122426  |
| C | 3.539625  | -1.936086 | -1.959285 | C                                                | 3.067382  | 1.467242  | 1.020976  |
| C | 1.602896  | -1.877077 | -3.524893 | C                                                | 2.457134  | 1.660540  | -0.216021 |
| C | 0.064336  | -0.063456 | -1.677073 | C                                                | 1.039741  | 2.182638  | -0.368634 |
| C | -5.475824 | -4.482627 | -0.461806 | C                                                | 0.620608  | 3.195203  | 0.719708  |
| O | -4.817433 | -3.855332 | 0.640469  | C                                                | -0.671647 | 3.935149  | 0.452466  |
| H | -2.252465 | -0.593375 | 2.293714  | C                                                | -1.785515 | 3.752913  | 1.273998  |
| H | -3.611517 | -2.637779 | 2.504095  | C                                                | -2.967622 | 4.452660  | 1.041507  |
| H | -4.414812 | -2.520642 | -1.709892 | C                                                | -3.051326 | 5.347199  | -0.019860 |
| H | -3.088951 | -0.500433 | -1.915867 | C                                                | -1.944648 | 5.542728  | -0.843432 |
| H | -1.543437 | 1.239044  | 1.084560  | C                                                | -0.765816 | 4.844760  | -0.606413 |
| H | -1.422458 | 2.733057  | -0.911613 | N                                                | 0.069660  | 1.052822  | -0.489985 |
| H | -2.448968 | 1.625685  | -1.804957 | C                                                | 0.136072  | -0.100492 | 0.121428  |
| H | -4.856925 | 1.658630  | -1.474432 | N                                                | -0.830837 | -0.951961 | -0.172713 |
| H | -6.828924 | 2.730699  | -0.459808 | C                                                | -0.755787 | -2.351467 | 0.214242  |
| H | -6.551445 | 4.342225  | 1.403623  | C                                                | -1.167735 | -2.728827 | 1.507450  |
| H | -4.276021 | 4.882349  | 2.229623  | C                                                | -1.590301 | -1.731266 | 2.578736  |
| H | -2.304251 | 3.821286  | 1.207510  | C                                                | -2.940483 | -2.083312 | 3.223438  |
| H | 0.745953  | 0.897333  | 1.420326  | C                                                | -0.497914 | -1.593646 | 3.656178  |
| H | 2.420930  | 2.151033  | -1.289896 | C                                                | -1.124275 | -4.086333 | 1.828726  |
| H | 2.817774  | 4.529268  | -0.925410 | C                                                | -0.686262 | -5.030616 | 0.913317  |
| H | 2.606319  | 3.711150  | 0.628865  | C                                                | -0.234052 | -4.627436 | -0.333351 |
| H | 4.218796  | 4.186341  | 0.091167  | C                                                | -0.233237 | -3.282020 | -0.704876 |
| H | 3.850206  | 3.307366  | -2.900272 | C                                                | 0.390143  | -2.895351 | -2.042383 |
| H | 4.403417  | 1.635846  | -2.741084 | C                                                | 1.885222  | -3.261694 | -2.073334 |
| H | 5.294594  | 2.940508  | -1.961012 | C                                                | -0.351505 | -3.519165 | -3.236094 |
| H | 5.833435  | 2.376959  | 0.211979  | C                                                | -1.710694 | -0.356840 | -1.252498 |
| H | 6.710649  | 0.828200  | 1.907119  | C                                                | -3.252781 | -0.392409 | -1.058934 |
| H | 5.302530  | -0.995650 | 2.759638  | C                                                | -3.727466 | 0.355990  | 0.194059  |
| H | 1.881279  | -1.781434 | 1.502874  | C                                                | -3.759606 | -1.845006 | -1.019777 |
| H | 2.822862  | -3.821119 | 2.448434  | C                                                | -3.853827 | 0.284554  | -2.310741 |
| H | 3.806362  | -3.337338 | 1.063985  | C                                                | -1.109982 | 1.074508  | -1.378895 |
| H | 4.386467  | -3.054089 | 2.705146  | C                                                | 7.025935  | -0.032193 | 1.187118  |
| H | 1.723277  | -2.083526 | 3.935927  | O                                                | 6.348778  | 0.177607  | -0.054002 |
| H | 1.844136  | -0.360704 | 3.556334  | H                                                | 2.750052  | 1.503983  | -2.344963 |
| H | 3.248171  | -1.226185 | 4.175387  | H                                                | 5.049393  | 0.628828  | -2.178559 |
| H | 2.135239  | 0.356598  | -2.209134 | H                                                | 4.805004  | 0.841342  | 2.100979  |
| H | 1.585985  | -2.870890 | -0.192550 | H                                                | 2.544641  | 1.709320  | 1.937675  |
| H | 0.234732  | -2.853029 | -1.327007 |                                                  |           |           |           |
| H | 1.636748  | -3.858568 | -1.645184 |                                                  |           |           |           |

|                                    |           |           |           |   |           |           |           |
|------------------------------------|-----------|-----------|-----------|---|-----------|-----------|-----------|
| H                                  | 0.976532  | 2.680994  | -1.336895 | C | -2.997534 | 5.426030  | -0.237779 |
| H                                  | 0.557233  | 2.689377  | 1.684631  | C | -3.019103 | 4.559517  | 0.849647  |
| H                                  | 1.438081  | 3.916120  | 0.795968  | C | -1.877913 | 3.836248  | 1.190069  |
| H                                  | -1.726262 | 3.066182  | 2.110855  | N | 0.080998  | 1.049418  | -0.390704 |
| H                                  | -3.819255 | 4.301995  | 1.693497  | C | 0.119254  | -0.116511 | 0.198480  |
| H                                  | -3.967437 | 5.895835  | -0.199589 | N | -0.830573 | -0.962571 | -0.162090 |
| H                                  | -1.996930 | 6.247440  | -1.664277 | C | -0.764572 | -2.376631 | 0.171832  |
| H                                  | 0.093896  | 5.021229  | -1.243519 | C | -0.211099 | -3.266779 | -0.769675 |
| H                                  | 0.937198  | -0.354148 | 0.800432  | C | 0.456850  | -2.822784 | -2.067672 |
| H                                  | -1.700588 | -0.755593 | 2.107281  | C | 1.953945  | -3.182842 | -2.061985 |
| H                                  | -3.238783 | -1.294124 | 3.916773  | C | -0.238913 | -3.399255 | -3.311920 |
| H                                  | -3.728867 | -2.193527 | 2.477350  | C | -0.224218 | -4.627303 | -0.459065 |
| H                                  | -2.885424 | -3.013492 | 3.791474  | C | -0.720006 | -5.085430 | 0.751524  |
| H                                  | -0.782743 | -0.834013 | 4.387346  | C | -1.190229 | -4.182450 | 1.691959  |
| H                                  | 0.463479  | -1.306307 | 3.224756  | C | -1.221857 | -2.811518 | 1.431369  |
| H                                  | -0.351967 | -2.534732 | 4.190265  | C | -1.683295 | -1.866892 | 2.533992  |
| H                                  | -1.436628 | -4.408631 | 2.813237  | C | -3.078947 | -2.217876 | 3.074763  |
| H                                  | -0.675670 | -6.080084 | 1.180249  | C | -0.656940 | -1.828832 | 3.682134  |
| H                                  | 0.147609  | -5.369017 | -1.023371 | C | -1.671726 | -0.337588 | -1.254833 |
| H                                  | 0.340289  | -1.812604 | -2.153338 | C | -3.217732 | -0.347654 | -1.089932 |
| H                                  | 2.337390  | -2.912753 | -3.004056 | C | -3.749069 | -1.791743 | -1.076810 |
| H                                  | 2.423615  | -2.804532 | -1.240901 | C | -3.787165 | 0.351984  | -2.343867 |
| H                                  | 2.031618  | -4.341535 | -2.015666 | C | -3.696914 | 0.395356  | 0.164571  |
| H                                  | 0.089069  | -3.176997 | -4.174760 | C | -1.043104 | 1.084213  | -1.348624 |
| H                                  | -1.409838 | -3.251781 | -3.240312 | C | 7.198115  | -0.076000 | -0.257475 |
| H                                  | -0.285526 | -4.608604 | -3.217184 | O | 6.274803  | 0.185482  | 0.801920  |
| H                                  | -1.502601 | -0.920716 | -2.161743 | H | 2.975711  | 1.613575  | -2.011176 |
| H                                  | -3.364205 | -0.107609 | 1.109482  | H | 5.231944  | 0.757812  | -1.659015 |
| H                                  | -3.422305 | 1.403324  | 0.198092  | H | 4.552099  | 0.716702  | 2.578431  |
| H                                  | -4.818154 | 0.340515  | 0.232192  | H | 2.286746  | 1.590294  | 2.224864  |
| H                                  | -3.447189 | -2.402106 | -1.905965 | H | 1.062665  | 2.662734  | -1.182627 |
| H                                  | -4.850896 | -1.847635 | -0.996712 | H | 0.389491  | 2.702534  | 1.792593  |
| H                                  | -3.408482 | -2.384718 | -0.141919 | H | 1.368463  | 3.908394  | 0.981676  |
| H                                  | -3.525881 | -0.209646 | -3.228543 | H | 0.222100  | 4.989011  | -1.205680 |
| H                                  | -3.592749 | 1.342206  | -2.379445 | H | -1.795992 | 6.254860  | -1.817486 |
| H                                  | -4.942186 | 0.221002  | -2.270263 | H | -3.882210 | 5.991751  | -0.502129 |
| H                                  | -0.794757 | 1.303671  | -2.395706 | H | -3.921770 | 4.448234  | 1.437775  |
| H                                  | -1.798350 | 1.847478  | -1.046420 | H | -1.902182 | 3.171314  | 2.046141  |
| H                                  | 8.008045  | -0.416319 | 0.925127  | H | 0.885642  | -0.381988 | 0.911838  |
| H                                  | 7.136902  | 0.903945  | 1.739629  | H | 0.405751  | -1.736572 | -2.136316 |
| H                                  | 6.501773  | -0.765790 | 1.804591  | H | 2.434810  | -2.799510 | -2.964458 |
| B3LYP energy = -1507.78652517 a.u. |           |           |           | H | 2.462606  | -2.754071 | -1.196481 |
| (5S,1'S)-10a, Conf. J              |           |           |           | H | 2.103710  | -4.263495 | -2.037776 |
| C                                  | 3.305337  | 1.410911  | -0.998352 | H | 0.233478  | -3.016715 | -4.219032 |
| C                                  | 4.593603  | 0.922443  | -0.803253 | H | -1.297831 | -3.136007 | -3.343854 |
| C                                  | 5.043336  | 0.663497  | 0.493615  | H | -0.168359 | -4.488290 | -3.335959 |
| C                                  | 4.191255  | 0.909091  | 1.576410  | H | 0.181410  | -5.337525 | -1.168031 |
| C                                  | 2.913979  | 1.398930  | 1.363650  | H | -0.718487 | -6.145789 | 0.971462  |
| C                                  | 2.443239  | 1.653835  | 0.069516  | H | -1.537132 | -4.547977 | 2.649626  |
| C                                  | 1.045202  | 2.175875  | -0.206548 | H | -1.739454 | -0.861549 | 2.118538  |
| C                                  | 0.547437  | 3.202332  | 0.835353  | H | -3.394442 | -1.469245 | 3.804470  |
| C                                  | -0.700434 | 3.966827  | 0.451808  | H | -3.825558 | -2.250363 | 2.280032  |
| C                                  | -0.688346 | 4.850765  | -0.632702 | H | -3.083042 | -3.186855 | 3.576801  |
| C                                  | -1.826016 | 5.571541  | -0.977609 | H | -0.958092 | -1.095629 | 4.433429  |
|                                    |           |           |           | H | 0.341068  | -1.563619 | 3.327232  |
|                                    |           |           |           | H | -0.582881 | -2.800761 | 4.174210  |

|   |           |           |           |
|---|-----------|-----------|-----------|
| H | -1.456787 | -0.893800 | -2.166715 |
| H | -3.431069 | -2.342247 | -1.965057 |
| H | -3.420522 | -2.348865 | -0.201431 |
| H | -4.840441 | -1.776648 | -1.070977 |
| H | -3.506414 | 1.405307  | -2.400510 |
| H | -4.877047 | 0.308011  | -2.320291 |
| H | -3.454787 | -0.140733 | -3.260917 |
| H | -3.379828 | 1.438991  | 0.179145  |
| H | -3.346258 | -0.079031 | 1.079736  |
| H | -4.788008 | 0.391863  | 0.193244  |
| H | -0.661488 | 1.305304  | -2.344636 |
| H | -1.738665 | 1.868399  | -1.061428 |
| H | 7.434580  | 0.836738  | -0.809652 |
| H | 8.097693  | -0.451704 | 0.222389  |
| H | 6.808862  | -0.832475 | -0.943347 |

B3LYP energy = -1507.78652474 a.u.

(5*S*,1'*S*)-**10a**, Conf. K

|   |           |           |           |
|---|-----------|-----------|-----------|
| C | 3.405723  | 1.195652  | -1.305341 |
| C | 4.657151  | 0.615135  | -1.222313 |
| C | 5.214900  | 0.323282  | 0.029099  |
| C | 4.496722  | 0.628832  | 1.185698  |
| C | 3.235670  | 1.214580  | 1.082962  |
| C | 2.666837  | 1.503094  | -0.154680 |
| C | 1.284275  | 2.112228  | -0.310743 |
| C | 0.869071  | 3.067283  | 0.826647  |
| C | -0.430620 | 3.800839  | 0.584755  |
| C | -1.584898 | 3.471430  | 1.297583  |
| C | -2.778607 | 4.155811  | 1.080640  |
| C | -2.833987 | 5.181785  | 0.143488  |
| C | -1.688041 | 5.522921  | -0.571458 |
| C | -0.497449 | 4.839683  | -0.349687 |
| N | 0.261538  | 1.046963  | -0.535785 |
| C | 0.058989  | -0.006118 | 0.210261  |
| N | -0.895421 | -0.819927 | -0.208978 |
| C | -1.050247 | -2.154632 | 0.349404  |
| C | -0.370204 | -3.228493 | -0.258252 |
| C | 0.622434  | -3.064024 | -1.404418 |
| C | 2.039896  | -3.474530 | -0.965082 |
| C | 0.195763  | -3.834413 | -2.664702 |
| C | -0.580276 | -4.505395 | 0.264709  |
| C | -1.390935 | -4.706769 | 1.370794  |
| C | -1.991982 | -3.624472 | 1.994069  |
| C | -1.837137 | -2.326430 | 1.504708  |
| C | -2.467160 | -1.170415 | 2.271136  |
| C | -3.967016 | -1.378927 | 2.535152  |
| C | -1.717185 | -0.920869 | 3.592903  |
| C | -1.398050 | -0.335519 | -1.556540 |
| C | -2.928665 | -0.296850 | -1.821855 |
| C | -3.697040 | 0.617373  | -0.858343 |
| C | -3.521158 | -1.716109 | -1.773681 |
| C | -3.093082 | 0.236204  | -3.262518 |
| C | -0.687804 | 1.043556  | -1.665025 |
| C | 7.082712  | -0.548299 | 1.256117  |
| O | 6.447489  | -0.244193 | 0.012469  |

|   |           |           |           |
|---|-----------|-----------|-----------|
| H | 2.995262  | 1.421000  | -2.283617 |
| H | 5.226691  | 0.387178  | -2.113996 |
| H | 4.905037  | 0.426938  | 2.165231  |
| H | 2.711465  | 1.450924  | 2.000264  |
| H | 1.275365  | 2.676261  | -1.243570 |
| H | 0.805779  | 2.513839  | 1.765062  |
| H | 1.683035  | 3.786260  | 0.942516  |
| H | -1.549300 | 2.681149  | 2.039387  |
| H | -3.662049 | 3.890691  | 1.648429  |
| H | -3.759562 | 5.718590  | -0.023065 |
| H | -1.718883 | 6.329987  | -1.293165 |
| H | 0.392887  | 5.128597  | -0.897853 |
| H | 0.642093  | -0.217817 | 1.095168  |
| H | 0.679836  | -2.009102 | -1.669636 |
| H | 2.752093  | -3.278687 | -1.769255 |
| H | 2.359813  | -2.915492 | -0.083640 |
| H | 2.091506  | -4.538049 | -0.725317 |
| H | 0.905504  | -3.652675 | -3.474321 |
| H | -0.795498 | -3.532806 | -3.008195 |
| H | 0.170054  | -4.910245 | -2.482125 |
| H | -0.083520 | -5.353235 | -0.189092 |
| H | -1.536810 | -5.706494 | 1.760740  |
| H | -2.590905 | -3.789394 | 2.880013  |
| H | -2.363683 | -0.269267 | 1.667898  |
| H | -4.392125 | -0.484980 | 2.996039  |
| H | -4.516602 | -1.578682 | 1.614055  |
| H | -4.143473 | -2.212907 | 3.216612  |
| H | -2.141123 | -0.058078 | 4.111226  |
| H | -0.655413 | -0.728500 | 3.425270  |
| H | -1.795467 | -1.783148 | 4.258196  |
| H | -0.978357 | -1.017186 | -2.297248 |
| H | -3.646542 | 0.262059  | 0.169045  |
| H | -3.338312 | 1.647125  | -0.877415 |
| H | -4.749863 | 0.638380  | -1.145492 |
| H | -3.003196 | -2.388285 | -2.461221 |
| H | -4.569915 | -1.681342 | -2.074004 |
| H | -3.476877 | -2.153151 | -0.777545 |
| H | -2.551458 | -0.382158 | -3.982749 |
| H | -2.747331 | 1.266541  | -3.367563 |
| H | -4.148587 | 0.218267  | -3.537408 |
| H | -0.145214 | 1.156699  | -2.601477 |
| H | -1.375217 | 1.881022  | -1.554383 |
| H | 8.043010  | -0.985829 | 0.996977  |
| H | 7.242901  | 0.355498  | 1.848963  |
| H | 6.498627  | -1.269735 | 1.832924  |

B3LYP energy = -1507.78615385 a.u.

(5*S*,1'*R*)-**10b**, Conf. A

|   |           |           |           |
|---|-----------|-----------|-----------|
| C | -3.464200 | -0.253797 | -1.472275 |
| C | -4.668217 | -0.932434 | -1.457443 |
| C | -5.591460 | -0.701101 | -0.429964 |
| C | -5.283622 | 0.220322  | 0.572199  |
| C | -4.064847 | 0.895889  | 0.540005  |
| C | -3.136949 | 0.672728  | -0.473581 |

|   |           |           |           |
|---|-----------|-----------|-----------|
| C | -1.793768 | 1.380146  | -0.539999 |
| C | -1.778025 | 2.802209  | 0.057933  |
| C | -0.524887 | 3.590221  | -0.254281 |
| C | -0.243212 | 3.986784  | -1.566495 |
| C | 0.896645  | 4.727253  | -1.859446 |
| C | 1.776595  | 5.088285  | -0.841866 |
| C | 1.505074  | 4.706321  | 0.467310  |
| C | 0.362467  | 3.963690  | 0.756407  |
| N | -0.735948 | 0.522565  | 0.055279  |
| C | 0.356120  | 0.138345  | -0.551985 |
| N | 1.152266  | -0.643146 | 0.157273  |
| C | 2.227916  | -1.405152 | -0.458568 |
| C | 3.487002  | -0.800750 | -0.639520 |
| C | 3.767432  | 0.667615  | -0.347264 |
| C | 4.984988  | 0.872072  | 0.568581  |
| C | 3.943087  | 1.455608  | -1.659343 |
| C | 4.508094  | -1.586460 | -1.177112 |
| C | 4.291264  | -2.908530 | -1.532001 |
| C | 3.026824  | -3.461287 | -1.400831 |
| C | 1.961975  | -2.721323 | -0.885306 |
| C | 0.570895  | -3.347295 | -0.885592 |
| C | 0.096537  | -3.609843 | -2.327059 |
| C | 0.499322  | -4.630690 | -0.042504 |
| C | 0.494915  | -0.942761 | 1.488457  |
| C | 1.336687  | -0.766362 | 2.784378  |
| C | 2.516035  | -1.753998 | 2.802403  |
| C | 0.398784  | -1.128494 | 3.957165  |
| C | 1.857557  | 0.664161  | 2.980436  |
| C | -0.771056 | -0.039545 | 1.418502  |
| C | -7.743245 | -1.203930 | 0.503659  |
| O | -6.746740 | -1.409782 | -0.499738 |
| H | -2.767508 | -0.440027 | -2.282197 |
| H | -4.920239 | -1.639744 | -2.236941 |
| H | -5.978462 | 0.425907  | 1.373562  |
| H | -3.859286 | 1.610860  | 1.326532  |
| H | -1.516122 | 1.458744  | -1.591582 |
| H | -2.647625 | 3.318086  | -0.355550 |
| H | -1.928295 | 2.761461  | 1.137778  |
| H | -0.930828 | 3.733229  | -2.366158 |
| H | 1.092092  | 5.032983  | -2.879979 |
| H | 2.661067  | 5.670659  | -1.067955 |
| H | 2.176907  | 4.992528  | 1.267264  |
| H | 0.152134  | 3.688629  | 1.783491  |
| H | 0.583982  | 0.423175  | -1.569547 |
| H | 2.900499  | 1.085661  | 0.162474  |
| H | 5.089440  | 1.930038  | 0.817691  |
| H | 4.890638  | 0.313496  | 1.501051  |
| H | 5.910411  | 0.557386  | 0.083069  |
| H | 4.075673  | 2.517826  | -1.445269 |
| H | 3.076149  | 1.348863  | -2.314647 |
| H | 4.819962  | 1.109888  | -2.210819 |
| H | 5.488461  | -1.152778 | -1.324513 |
| H | 5.102986  | -3.501813 | -1.934355 |
| H | 2.857278  | -4.480138 | -1.724018 |
| H | -0.135487 | -2.636540 | -0.457843 |
| H | -0.927454 | -3.989235 | -2.321907 |

|   |           |           |           |
|---|-----------|-----------|-----------|
| H | 0.119271  | -2.695410 | -2.923423 |
| H | 0.724654  | -4.350146 | -2.825654 |
| H | -0.521903 | -5.016910 | -0.032217 |
| H | 0.804726  | -4.453623 | 0.990372  |
| H | 1.144343  | -5.411573 | -0.449792 |
| H | 0.196044  | -1.990423 | 1.454123  |
| H | 2.177025  | -2.784013 | 2.673653  |
| H | 3.248724  | -1.541503 | 2.026190  |
| H | 3.025489  | -1.691882 | 3.765702  |
| H | -0.440738 | -0.436847 | 4.051946  |
| H | 0.958043  | -1.088803 | 4.893069  |
| H | -0.001701 | -2.139737 | 3.852301  |
| H | 1.055136  | 1.402787  | 3.019105  |
| H | 2.549365  | 0.959156  | 2.193757  |
| H | 2.393975  | 0.725920  | 3.928925  |
| H | -1.692828 | -0.598463 | 1.563767  |
| H | -0.736291 | 0.768255  | 2.146431  |
| H | -8.090783 | -0.168005 | 0.508364  |
| H | -8.567397 | -1.860967 | 0.239354  |
| H | -7.368186 | -1.472014 | 1.494413  |

B3LYP energy = -1507.78853843 a.u.

(5*S*,1'*R*)-**10b**, Conf. B

|   |           |           |           |
|---|-----------|-----------|-----------|
| C | -3.959775 | 1.016824  | 0.883628  |
| C | -5.200401 | 0.414353  | 0.999722  |
| C | -5.679464 | -0.419659 | -0.016975 |
| C | -4.893184 | -0.638904 | -1.150295 |
| C | -3.646820 | -0.026915 | -1.248136 |
| C | -3.157203 | 0.805335  | -0.243729 |
| C | -1.786637 | 1.439172  | -0.405910 |
| C | -1.667572 | 2.862913  | 0.181432  |
| C | -0.419662 | 3.606883  | -0.236905 |
| C | -0.256442 | 4.027116  | -1.561741 |
| C | 0.874270  | 4.736504  | -1.951149 |
| C | 1.863285  | 5.042304  | -1.019154 |
| C | 1.711382  | 4.634465  | 0.301491  |
| C | 0.578201  | 3.921798  | 0.687197  |
| N | -0.736200 | 0.535886  | 0.132790  |
| C | 0.331028  | 0.142680  | -0.511884 |
| N | 1.134179  | -0.663446 | 0.162288  |
| C | 2.174081  | -1.440661 | -0.495686 |
| C | 1.867343  | -2.746117 | -0.928749 |
| C | 0.464693  | -3.343949 | -0.890827 |
| C | -0.057167 | -3.593925 | -2.318027 |
| C | 0.393340  | -4.628809 | -0.049648 |
| C | 2.899375  | -3.502449 | -1.485566 |
| C | 4.171072  | -2.975764 | -1.648837 |
| C | 4.427451  | -1.663345 | -1.285083 |
| C | 3.440515  | -0.862225 | -0.707825 |
| C | 3.762928  | 0.595649  | -0.408618 |
| C | 5.008000  | 0.762165  | 0.477264  |
| C | 3.921431  | 1.392640  | -1.717176 |
| C | 0.513484  | -0.966768 | 1.510183  |
| C | 1.395052  | -0.815637 | 2.781989  |
| C | 0.485699  | -1.172759 | 3.978887  |

|   |           |           |           |
|---|-----------|-----------|-----------|
| C | 1.944869  | 0.604457  | 2.974296  |
| C | 2.556304  | -1.824185 | 2.756411  |
| C | -0.738850 | -0.042989 | 1.489183  |
| C | -7.467616 | -1.802432 | -0.822115 |
| O | -6.908265 | -0.958787 | 0.186637  |
| H | -3.625836 | 1.664055  | 1.684408  |
| H | -5.820310 | 0.583155  | 1.870620  |
| H | -5.238735 | -1.268754 | -1.957096 |
| H | -3.051652 | -0.201708 | -2.137799 |
| H | -1.574463 | 1.498099  | -1.474017 |
| H | -2.549581 | 3.409919  | -0.158703 |
| H | -1.728110 | 2.828655  | 1.270107  |
| H | -1.029270 | 3.816016  | -2.293294 |
| H | 0.977983  | 5.061730  | -2.979085 |
| H | 2.740232  | 5.601867  | -1.319858 |
| H | 2.469543  | 4.877441  | 1.035890  |
| H | 0.462804  | 3.625937  | 1.723594  |
| H | 0.532823  | 0.437731  | -1.532188 |
| H | -0.213614 | -2.620066 | -0.440516 |
| H | -1.090074 | -3.946960 | -2.283535 |
| H | -0.027377 | -2.681183 | -2.916608 |
| H | 0.537134  | -4.350738 | -2.832967 |
| H | -0.635251 | -4.992290 | -0.004230 |
| H | 0.739955  | -4.463581 | 0.972101  |
| H | 1.005776  | -5.421966 | -0.482676 |
| H | 2.697961  | -4.513276 | -1.815753 |
| H | 4.956892  | -3.581415 | -2.082967 |
| H | 5.412195  | -1.248983 | -1.456800 |
| H | 2.919420  | 1.027172  | 0.127841  |
| H | 5.145667  | 1.815185  | 0.731185  |
| H | 4.922595  | 0.199015  | 1.407839  |
| H | 5.912651  | 0.427663  | -0.033472 |
| H | 4.088156  | 2.448600  | -1.496833 |
| H | 3.032745  | 1.315248  | -2.346888 |
| H | 4.772241  | 1.030245  | -2.298046 |
| H | 0.197234  | -2.009160 | 1.475636  |
| H | -0.340676 | -0.470154 | 4.103012  |
| H | 0.068041  | -2.177378 | 3.878072  |
| H | 1.072095  | -1.148372 | 4.898589  |
| H | 2.619294  | 0.894665  | 2.170846  |
| H | 2.508163  | 0.650268  | 3.907970  |
| H | 1.155253  | 1.354842  | 3.041242  |
| H | 3.269631  | -1.617008 | 1.960953  |
| H | 2.193255  | -2.846027 | 2.627101  |
| H | 3.094707  | -1.782229 | 3.704888  |
| H | -1.663833 | -0.589468 | 1.656544  |
| H | -0.669241 | 0.756076  | 2.224564  |
| H | -8.443431 | -2.100675 | -0.448354 |
| H | -7.588469 | -1.263995 | -1.765194 |
| H | -6.852297 | -2.691583 | -0.980643 |

B3LYP energy = -1507.78846606 a.u.

(5*S*,1'*R*)-**10b**, Conf. C

|   |           |          |           |
|---|-----------|----------|-----------|
| C | -2.331082 | 1.183559 | -0.798224 |
| C | -3.144455 | 2.276019 | -1.033044 |

|   |           |           |           |
|---|-----------|-----------|-----------|
| C | -4.200386 | 2.569054  | -0.159417 |
| C | -4.419312 | 1.752293  | 0.950255  |
| C | -3.584756 | 0.658359  | 1.173731  |
| C | -2.538431 | 0.353968  | 0.310228  |
| C | -1.663857 | -0.861847 | 0.559216  |
| C | -1.809033 | -1.971271 | -0.504706 |
| C | -3.176964 | -2.616765 | -0.485017 |
| C | -3.484503 | -3.585121 | 0.474452  |
| C | -4.740426 | -4.182173 | 0.505475  |
| C | -5.707921 | -3.820109 | -0.428051 |
| C | -5.410283 | -2.860980 | -1.390979 |
| C | -4.152894 | -2.264272 | -1.418371 |
| N | -0.244946 | -0.460707 | 0.715870  |
| C | 0.735855  | -0.591984 | -0.139487 |
| N | 1.873223  | -0.019653 | 0.217426  |
| C | 3.118998  | -0.298288 | -0.479693 |
| C | 3.963960  | -1.307318 | 0.022586  |
| C | 3.590071  | -2.225531 | 1.181675  |
| C | 3.438202  | -3.678910 | 0.695929  |
| C | 4.587384  | -2.140513 | 2.348465  |
| C | 5.181697  | -1.515113 | -0.626505 |
| C | 5.531209  | -0.785606 | -1.752009 |
| C | 4.651195  | 0.152000  | -2.268465 |
| C | 3.426066  | 0.417323  | -1.653836 |
| C | 2.479586  | 1.412376  | -2.315396 |
| C | 3.134392  | 2.783974  | -2.550097 |
| C | 1.933407  | 0.848957  | -3.641147 |
| C | 1.722166  | 0.567599  | 1.607021  |
| C | 2.208686  | 2.022705  | 1.858939  |
| C | 3.728309  | 2.129961  | 1.645504  |
| C | 1.919483  | 2.314460  | 3.347788  |
| C | 1.486218  | 3.062821  | 0.991619  |
| C | 0.205959  | 0.345290  | 1.865779  |
| C | -6.047162 | 4.009393  | 0.360910  |
| O | -4.943656 | 3.660129  | -0.476882 |
| H | -1.524335 | 0.979012  | -1.493071 |
| H | -2.984478 | 2.917524  | -1.889925 |
| H | -5.225516 | 1.952194  | 1.641049  |
| H | -3.767978 | 0.031586  | 2.038984  |
| H | -1.940193 | -1.287214 | 1.525846  |
| H | -1.621084 | -1.558717 | -1.497666 |
| H | -1.050839 | -2.735393 | -0.313303 |
| H | -2.732942 | -3.883815 | 1.197211  |
| H | -4.960796 | -4.935198 | 1.252160  |
| H | -6.684800 | -4.287078 | -0.408289 |
| H | -6.155357 | -2.578438 | -2.124526 |
| H | -3.929128 | -1.519792 | -2.173344 |
| H | 0.643440  | -1.139267 | -1.064915 |
| H | 2.614536  | -1.928785 | 1.565199  |
| H | 3.101598  | -4.315283 | 1.517068  |
| H | 2.709818  | -3.753015 | -0.114173 |
| H | 4.385960  | -4.078318 | 0.330817  |
| H | 4.253780  | -2.773157 | 3.173674  |
| H | 4.688023  | -1.119996 | 2.722190  |
| H | 5.579630  | -2.483448 | 2.050018  |
| H | 5.857869  | -2.275622 | -0.257773 |



|   |           |           |           |
|---|-----------|-----------|-----------|
| H | 6.481103  | -0.964133 | -2.240451 |
| H | 4.918925  | 0.687231  | -3.170082 |
| H | 1.626091  | 1.565893  | -1.655490 |
| H | 2.396330  | 3.487420  | -2.940939 |
| H | 3.545454  | 3.201545  | -1.630024 |
| H | 3.944729  | 2.720280  | -3.278429 |
| H | 1.204870  | 1.539114  | -4.071974 |
| H | 1.445694  | -0.118482 | -3.504240 |
| H | 2.734555  | 0.712036  | -4.370026 |
| H | 2.300223  | -0.071594 | 2.273901  |
| H | 4.268324  | 1.405580  | 2.259129  |
| H | 4.016777  | 1.973370  | 0.607654  |
| H | 4.066035  | 3.126099  | 1.936887  |
| H | 0.851750  | 2.306699  | 3.575541  |
| H | 2.298919  | 3.304781  | 3.603464  |
| H | 2.414744  | 1.590616  | 3.999672  |
| H | 0.406494  | 3.065887  | 1.149998  |
| H | 1.671388  | 2.908574  | -0.069657 |
| H | 1.849124  | 4.060226  | 1.245797  |
| H | 0.014095  | -0.197014 | 2.790122  |
| H | -0.356228 | 1.277304  | 1.884462  |
| H | -5.715422 | 4.241996  | 1.375886  |
| H | -6.488170 | 4.895875  | -0.087003 |
| H | -6.789980 | 3.208552  | 0.389800  |

B3LYP energy = -1507.78787372 a.u.

(5*S*,1'*R*)-**10b**, Conf. D

|   |           |           |           |
|---|-----------|-----------|-----------|
| C | -2.464603 | -1.250818 | 0.579389  |
| C | -3.313891 | -2.348566 | 0.676516  |
| C | -4.322361 | -2.528296 | -0.274662 |
| C | -4.459107 | -1.602026 | -1.313494 |
| C | -3.601175 | -0.518337 | -1.396274 |
| C | -2.591264 | -0.322259 | -0.450715 |
| C | -1.678231 | 0.887257  | -0.546332 |
| C | -1.845158 | 1.899323  | 0.607639  |
| C | -3.195449 | 2.580877  | 0.581593  |
| C | -3.423111 | 3.654267  | -0.283788 |
| C | -4.662262 | 4.284672  | -0.324743 |
| C | -5.693207 | 3.850554  | 0.504291  |
| C | -5.475944 | 2.785108  | 1.372209  |
| C | -4.235071 | 2.155301  | 1.409571  |
| N | -0.263521 | 0.466565  | -0.687841 |
| C | 0.709931  | 0.563003  | 0.179795  |
| N | 1.858142  | 0.029830  | -0.203651 |
| C | 3.097531  | 0.295317  | 0.509339  |
| C | 3.407463  | -0.462844 | 1.655471  |
| C | 2.463563  | -1.489479 | 2.269403  |
| C | 3.132241  | -2.855844 | 2.491231  |
| C | 1.871894  | -0.960906 | 3.589900  |
| C | 4.624284  | -0.206395 | 2.289596  |
| C | 5.494251  | 0.763527  | 1.817491  |
| C | 5.142094  | 1.532518  | 0.719470  |
| C | 3.931792  | 1.334791  | 0.053324  |
| C | 3.556156  | 2.293386  | -1.072372 |
| C | 3.368994  | 3.721923  | -0.529189 |

|   |           |           |           |
|---|-----------|-----------|-----------|
| C | 4.571302  | 2.272919  | -2.226591 |
| C | 1.720114  | -0.494119 | -1.619093 |
| C | 2.211376  | -1.937032 | -1.927392 |
| C | 1.923212  | -2.173660 | -3.426330 |
| C | 1.493824  | -3.014146 | -1.101992 |
| C | 3.731604  | -2.046055 | -1.717350 |
| C | 0.205533  | -0.262090 | -1.881548 |
| C | -5.120264 | -4.538240 | 0.763826  |
| O | -5.204743 | -3.560594 | -0.274390 |
| H | -1.693058 | -1.132278 | 1.331800  |
| H | -3.183807 | -3.047260 | 1.490131  |
| H | -5.242968 | -1.748626 | -2.045156 |
| H | -3.724363 | 0.190051  | -2.207168 |
| H | -1.904115 | 1.408876  | -1.478981 |
| H | -1.710085 | 1.395246  | 1.566617  |
| H | -1.063878 | 2.658844  | 0.520012  |
| H | -2.622343 | 4.007154  | -0.924766 |
| H | -4.820426 | 5.119025  | -0.997067 |
| H | -6.657375 | 4.342823  | 0.476814  |
| H | -6.271514 | 2.444237  | 2.023286  |
| H | -4.074802 | 1.326343  | 2.088738  |
| H | 0.602260  | 1.050999  | 1.136567  |
| H | 1.631850  | -1.641465 | 1.581958  |
| H | 2.394521  | -3.577550 | 2.848123  |
| H | 3.570965  | -3.247015 | 1.572179  |
| H | 3.923336  | -2.798494 | 3.240922  |
| H | 1.145746  | -1.671653 | 3.990313  |
| H | 1.369465  | -0.000660 | 3.454212  |
| H | 2.651186  | -0.819616 | 4.341310  |
| H | 4.893363  | -0.773299 | 3.171186  |
| H | 6.438161  | 0.935644  | 2.319591  |
| H | 5.810472  | 2.315915  | 0.386219  |
| H | 2.591792  | 1.995643  | -1.482212 |
| H | 3.036708  | 4.387109  | -1.329026 |
| H | 2.622952  | 3.747982  | 0.267604  |
| H | 4.301843  | 4.121909  | -0.127998 |
| H | 4.236019  | 2.928025  | -3.033296 |
| H | 4.699142  | 1.268913  | -2.635467 |
| H | 5.551784  | 2.625071  | -1.901324 |
| H | 2.303873  | 0.172324  | -2.253434 |
| H | 0.855032  | -2.172848 | -3.652102 |
| H | 2.405985  | -1.418141 | -4.050919 |
| H | 2.316020  | -3.147748 | -3.721221 |
| H | 1.693403  | -2.912827 | -0.036919 |
| H | 1.848420  | -3.999836 | -1.408453 |
| H | 0.412180  | -3.004412 | -1.247773 |
| H | 4.019312  | -1.928877 | -0.673932 |
| H | 4.268522  | -1.295793 | -2.301935 |
| H | 4.074356  | -3.028450 | -2.046956 |
| H | 0.021299  | 0.337371  | -2.771916 |
| H | -0.352331 | -1.192693 | -1.967063 |
| H | -5.272202 | -4.085938 | 1.746917  |
| H | -5.918636 | -5.248306 | 0.565694  |
| H | -4.158831 | -5.057535 | 0.741321  |

B3LYP energy = -1507.78754569 a.u.

(5*S*,1'*R*)-**10b**, Conf. E

|   |           |           |           |
|---|-----------|-----------|-----------|
| C | 4.100373  | 1.371502  | 1.118398  |
| C | 5.353419  | 0.797891  | 0.983299  |
| C | 5.588114  | -0.149025 | -0.019348 |
| C | 4.547143  | -0.510402 | -0.879027 |
| C | 3.295611  | 0.079579  | -0.730628 |
| C | 3.051341  | 1.025396  | 0.261875  |
| C | 1.698995  | 1.705447  | 0.401933  |
| C | 1.400736  | 2.655024  | -0.774566 |
| C | 0.152047  | 3.505114  | -0.651279 |
| C | -0.052043 | 4.336335  | 0.454618  |
| C | -1.183466 | 5.140137  | 0.541770  |
| C | -2.130800 | 5.131329  | -0.479209 |
| C | -1.935120 | 4.316871  | -1.588752 |
| C | -0.801789 | 3.511592  | -1.671300 |
| N | 0.632931  | 0.705160  | 0.629721  |
| C | -0.327102 | 0.320250  | -0.169630 |
| N | -1.065309 | -0.678513 | 0.284485  |
| C | -2.321394 | -1.060235 | -0.338711 |
| C | -3.527189 | -0.621309 | 0.243573  |
| C | -3.600417 | 0.345336  | 1.421688  |
| C | -4.307755 | 1.652085  | 1.018859  |
| C | -4.278116 | -0.282534 | 2.651264  |
| C | -4.720580 | -1.057522 | -0.333728 |
| C | -4.724548 | -1.854338 | -1.467631 |
| C | -3.525954 | -2.213888 | -2.063133 |
| C | -2.299190 | -1.828858 | -1.519814 |
| C | -1.021868 | -2.215043 | -2.256083 |
| C | -0.918202 | -3.727980 | -2.508974 |
| C | -0.898216 | -1.439308 | -3.581103 |
| C | -0.572111 | -1.093524 | 1.654347  |
| C | -0.181019 | -2.585060 | 1.865662  |
| C | 0.270059  | -2.705801 | 3.337896  |
| C | 0.962790  | -3.044588 | 0.949749  |
| C | -1.404548 | -3.497490 | 1.673097  |
| C | 0.594008  | -0.088897 | 1.872517  |
| C | 7.153365  | -1.624679 | -1.082489 |
| O | 6.845138  | -0.659569 | -0.074975 |
| H | 3.936939  | 2.102859  | 1.901936  |
| H | 6.164106  | 1.068166  | 1.647431  |
| H | 4.697974  | -1.241204 | -1.660137 |
| H | 2.504441  | -0.219819 | -1.408642 |
| H | 1.719883  | 2.296974  | 1.319606  |
| H | 2.276629  | 3.304978  | -0.841814 |
| H | 1.384471  | 2.096235  | -1.713451 |
| H | 0.684331  | 4.372795  | 1.249419  |
| H | -1.321337 | 5.781302  | 1.403736  |
| H | -3.009706 | 5.760107  | -0.412104 |
| H | -2.659961 | 4.309598  | -2.393370 |
| H | -0.651724 | 2.893738  | -2.550305 |
| H | -0.527804 | 0.789872  | -1.119354 |
| H | -2.587321 | 0.625717  | 1.708023  |
| H | -4.290966 | 2.356634  | 1.853014  |
| H | -3.816935 | 2.125190  | 0.166739  |
| H | -5.351548 | 1.476335  | 0.752954  |

|   |           |           |           |
|---|-----------|-----------|-----------|
| H | -4.263946 | 0.418963  | 3.487862  |
| H | -3.778743 | -1.199918 | 2.968374  |
| H | -5.320882 | -0.529931 | 2.443842  |
| H | -5.663189 | -0.749216 | 0.099892  |
| H | -5.663244 | -2.178024 | -1.899854 |
| H | -3.541684 | -2.806979 | -2.967992 |
| H | -0.171487 | -1.932929 | -1.636190 |
| H | 0.047435  | -3.965285 | -2.960284 |
| H | -1.008072 | -4.299794 | -1.584373 |
| H | -1.693953 | -4.074749 | -3.193688 |
| H | 0.046158  | -1.679789 | -4.074197 |
| H | -0.934363 | -0.358872 | -3.425123 |
| H | -1.708269 | -1.699273 | -4.265420 |
| H | -1.375930 | -0.880374 | 2.355948  |
| H | 1.173846  | -2.131125 | 3.549402  |
| H | -0.512836 | -2.374770 | 4.024444  |
| H | 0.490602  | -3.749914 | 3.564183  |
| H | 0.682504  | -3.013732 | -0.102027 |
| H | 1.223960  | -4.077377 | 1.186979  |
| H | 1.867961  | -2.447519 | 1.076503  |
| H | -1.770420 | -3.495067 | 0.647992  |
| H | -2.228491 | -3.201005 | 2.325864  |
| H | -1.135657 | -4.524552 | 1.926848  |
| H | 0.421636  | 0.576256  | 2.718557  |
| H | 1.552678  | -0.583669 | 2.008597  |
| H | 7.014654  | -1.209413 | -2.083646 |
| H | 8.200388  | -1.877064 | -0.938004 |
| H | 6.543968  | -2.524775 | -0.968647 |

B3LYP energy = -1507.78743703 a.u.

(5*S*,1'*R*)-**10b**, Conf. F

|   |           |           |           |
|---|-----------|-----------|-----------|
| C | 3.298417  | -1.149518 | -1.289353 |
| C | 4.547005  | -0.564286 | -1.200133 |
| C | 5.130895  | -0.341304 | 0.053691  |
| C | 4.440986  | -0.719992 | 1.205939  |
| C | 3.182299  | -1.309393 | 1.096900  |
| C | 2.587632  | -1.530978 | -0.142862 |
| C | 1.210378  | -2.148894 | -0.305207 |
| C | 0.831041  | -3.163839 | 0.795775  |
| C | -0.466563 | -3.901210 | 0.552788  |
| C | -0.559285 | -4.867666 | -0.454123 |
| C | -1.752812 | -5.542279 | -0.686590 |
| C | -2.876207 | -5.264388 | 0.088954  |
| C | -2.794017 | -4.312938 | 1.100180  |
| C | -1.596987 | -3.638018 | 1.329150  |
| N | 0.162787  | -1.094219 | -0.452338 |
| C | 0.142816  | 0.073230  | 0.134522  |
| N | -0.853976 | 0.865627  | -0.221092 |
| C | -1.183368 | 2.064828  | 0.532752  |
| C | -0.475333 | 3.255990  | 0.279292  |
| C | 0.703483  | 3.350488  | -0.681998 |
| C | 0.530915  | 4.469972  | -1.721312 |
| C | 2.025575  | 3.530123  | 0.087699  |
| C | -0.851983 | 4.394611  | 0.994064  |
| C | -1.881002 | 4.357691  | 1.921816  |

|   |           |           |           |
|---|-----------|-----------|-----------|
| C | -2.528476 | 3.161559  | 2.189119  |
| C | -2.182684 | 1.985335  | 1.522619  |
| C | -2.849772 | 0.681846  | 1.950309  |
| C | -2.501553 | 0.346743  | 3.412155  |
| C | -4.373098 | 0.703284  | 1.743740  |
| C | -1.752762 | 0.133084  | -1.195714 |
| C | -2.153601 | 0.851930  | -2.515346 |
| C | -0.950820 | 1.215707  | -3.397289 |
| C | -2.978558 | 2.115880  | -2.217134 |
| C | -3.062720 | -0.135761 | -3.279009 |
| C | -0.963480 | -1.190907 | -1.402899 |
| C | 7.019966  | 0.472431  | 1.287811  |
| O | 6.357920  | 0.237047  | 0.043009  |
| H | 2.868340  | -1.322711 | -2.269408 |
| H | 5.094390  | -0.279903 | -2.089444 |
| H | 4.868982  | -0.571186 | 2.186610  |
| H | 2.679178  | -1.600646 | 2.010025  |
| H | 1.192638  | -2.670383 | -1.263530 |
| H | 1.655377  | -3.878321 | 0.855731  |
| H | 0.781831  | -2.654652 | 1.759525  |
| H | 0.311764  | -5.103234 | -1.055893 |
| H | -1.803899 | -6.292303 | -1.466324 |
| H | -3.804137 | -5.793921 | -0.087415 |
| H | -3.658222 | -4.101102 | 1.717874  |
| H | -1.539454 | -2.908780 | 2.129383  |
| H | 0.882777  | 0.371705  | 0.862231  |
| H | 0.775610  | 2.409413  | -1.225676 |
| H | 1.351485  | 4.438953  | -2.440948 |
| H | -0.405602 | 4.370840  | -2.272066 |
| H | 0.541219  | 5.456555  | -1.254943 |
| H | 2.866795  | 3.544575  | -0.608376 |
| H | 2.193555  | 2.722345  | 0.802952  |
| H | 2.032873  | 4.470553  | 0.642442  |
| H | -0.328459 | 5.325898  | 0.821714  |
| H | -2.164349 | 5.257876  | 2.453008  |
| H | -3.302319 | 3.135139  | 2.945539  |
| H | -2.447725 | -0.132187 | 1.348114  |
| H | -2.924419 | -0.622224 | 3.685480  |
| H | -1.420844 | 0.302206  | 3.561432  |
| H | -2.904172 | 1.092297  | 4.099965  |
| H | -4.803262 | -0.261608 | 2.019737  |
| H | -4.639649 | 0.909139  | 0.705447  |
| H | -4.846585 | 1.466075  | 2.364629  |
| H | -2.679605 | -0.078165 | -0.663477 |
| H | -0.284641 | 1.923550  | -2.907415 |
| H | -0.363616 | 0.343187  | -3.689851 |
| H | -1.305530 | 1.683195  | -4.317381 |
| H | -3.848825 | 1.887812  | -1.597822 |
| H | -3.344048 | 2.539948  | -3.154085 |
| H | -2.396487 | 2.884042  | -1.711224 |
| H | -3.931802 | -0.421461 | -2.681512 |
| H | -2.537112 | -1.046076 | -3.573642 |
| H | -3.427997 | 0.338008  | -4.191327 |
| H | -1.562058 | -2.071192 | -1.185685 |
| H | -0.560189 | -1.282067 | -2.410957 |
| H | 7.199838  | -0.463504 | 1.822199  |

|   |          |          |          |
|---|----------|----------|----------|
| H | 7.970923 | 0.932291 | 1.033071 |
| H | 6.444430 | 1.153631 | 1.919403 |

B3LYP energy = -1507.78719991 a.u.

(5*S*,1'*R*)-**10b**, Conf. G

|   |           |           |           |
|---|-----------|-----------|-----------|
| C | 2.836380  | 1.236834  | -1.138192 |
| C | 3.624527  | 2.383958  | -1.111659 |
| C | 4.167300  | 2.816931  | 0.099516  |
| C | 3.912857  | 2.085875  | 1.266004  |
| C | 3.132555  | 0.944297  | 1.218780  |
| C | 2.573915  | 0.499507  | 0.013991  |
| C | 1.691183  | -0.730979 | -0.074939 |
| C | 2.206895  | -1.978738 | 0.676894  |
| C | 3.464606  | -2.548785 | 0.058433  |
| C | 3.391980  | -3.288656 | -1.125676 |
| C | 4.538835  | -3.816559 | -1.708800 |
| C | 5.780918  | -3.614809 | -1.112582 |
| C | 5.865115  | -2.884947 | 0.068473  |
| C | 4.714804  | -2.356579 | 0.648230  |
| N | 0.299631  | -0.414102 | 0.347550  |
| C | -0.741897 | -0.409379 | -0.441656 |
| N | -1.888921 | -0.098478 | 0.136269  |
| C | -3.076138 | 0.236129  | -0.634115 |
| C | -3.366438 | 1.595037  | -0.869487 |
| C | -2.438083 | 2.741570  | -0.480845 |
| C | -1.953232 | 3.504561  | -1.727179 |
| C | -3.086492 | 3.703994  | 0.528319  |
| C | -4.547497 | 1.895392  | -1.549811 |
| C | -5.383293 | 0.894585  | -2.019543 |
| C | -5.037603 | -0.435427 | -1.840015 |
| C | -3.880327 | -0.799738 | -1.149669 |
| C | -3.526213 | -2.278555 | -1.046222 |
| C | -4.664540 | -3.121438 | -0.448002 |
| C | -3.110004 | -2.839966 | -2.419269 |
| C | -1.643947 | 0.215719  | 1.596971  |
| C | -2.486346 | -0.550808 | 2.656878  |
| C | -2.034116 | -0.020283 | 4.035004  |
| C | -2.278280 | -2.071524 | 2.607806  |
| C | -3.980828 | -0.223840 | 2.495636  |
| C | -0.107636 | -0.017486 | 1.709255  |
| C | 5.268787  | 4.694163  | -0.909234 |
| O | 4.949219  | 3.916760  | 0.246464  |
| H | 2.427983  | 0.911115  | -2.088515 |
| H | 3.810584  | 2.919984  | -2.031025 |
| H | 4.345554  | 2.425013  | 2.198317  |
| H | 2.971335  | 0.395379  | 2.138283  |
| H | 1.599485  | -0.997994 | -1.128061 |
| H | 2.386023  | -1.741519 | 1.726327  |
| H | 1.415476  | -2.732081 | 0.650297  |
| H | 2.428358  | -3.466042 | -1.591328 |
| H | 4.462218  | -4.392342 | -2.623064 |
| H | 6.674761  | -4.028278 | -1.562931 |
| H | 6.826225  | -2.727824 | 0.542519  |
| H | 4.793132  | -1.792895 | 1.570128  |
| H | -0.672187 | -0.626800 | -1.497974 |

|   |           |           |           |   |           |           |           |
|---|-----------|-----------|-----------|---|-----------|-----------|-----------|
| H | -1.545992 | 2.327245  | -0.012325 | C | 3.860770  | 1.439608  | 3.064153  |
| H | -1.232864 | 4.272474  | -1.437645 | C | 2.101976  | 2.929352  | 2.028647  |
| H | -1.468764 | 2.835730  | -2.441051 | C | 4.457293  | 2.117294  | 0.143994  |
| H | -2.779626 | 3.999605  | -2.240093 | C | 4.983744  | 2.001585  | -1.132635 |
| H | -2.376536 | 4.482062  | 0.815918  | C | 4.414196  | 1.120026  | -2.038105 |
| H | -3.408027 | 3.186474  | 1.433998  | C | 3.330123  | 0.316229  | -1.683157 |
| H | -3.962134 | 4.195270  | 0.100165  | C | 2.674907  | -0.542623 | -2.760560 |
| H | -4.806068 | 2.930347  | -1.733219 | C | 2.021841  | 0.342811  | -3.837954 |
| H | -6.293581 | 1.151619  | -2.546855 | C | 3.654516  | -1.541836 | -3.397089 |
| H | -5.677720 | -1.207771 | -2.245753 | C | 1.841720  | -1.984587 | 0.181553  |
| H | -2.666926 | -2.378777 | -0.384352 | C | 2.715659  | -2.591318 | 1.316691  |
| H | -4.335705 | -4.155004 | -0.321961 | C | 2.567974  | -4.124105 | 1.197063  |
| H | -4.979258 | -2.745999 | 0.526809  | C | 2.277190  | -2.150619 | 2.720596  |
| H | -5.539515 | -3.133301 | -1.100124 | C | 4.198381  | -2.243886 | 1.099348  |
| H | -2.791672 | -3.879854 | -2.319529 | C | 0.332776  | -2.348220 | 0.272977  |
| H | -2.287470 | -2.273689 | -2.861511 | C | -3.585763 | 5.342281  | -0.594477 |
| H | -3.943266 | -2.811871 | -3.124131 | O | -3.473090 | 4.505339  | 0.558713  |
| H | -1.864638 | 1.273659  | 1.728941  | H | -2.130077 | 0.868854  | -1.841601 |
| H | -0.990381 | -0.253921 | 4.253285  | H | -2.813810 | 3.197879  | -1.747602 |
| H | -2.164757 | 1.061931  | 4.109644  | H | -3.255555 | 2.909795  | 2.512347  |
| H | -2.638913 | -0.481877 | 4.816900  | H | -2.550781 | 0.548101  | 2.417078  |
| H | -2.609412 | -2.499638 | 1.662762  | H | -2.057105 | -1.353617 | 1.241723  |
| H | -2.861036 | -2.542991 | 3.400970  | H | -2.415013 | -1.365016 | -1.790087 |
| H | -1.236711 | -2.359822 | 2.763946  | H | -2.115287 | -2.785606 | -0.809991 |
| H | -4.390274 | -0.593873 | 1.557743  | H | -4.685530 | -0.626260 | -2.091094 |
| H | -4.159073 | 0.852728  | 2.539732  | H | -7.088212 | -0.882850 | -1.614106 |
| H | -4.543623 | -0.685327 | 3.308951  | H | -7.842320 | -2.347641 | 0.238661  |
| H | 0.427927  | 0.881811  | 2.006936  | H | -6.164145 | -3.565109 | 1.600086  |
| H | 0.136168  | -0.814372 | 2.407618  | H | -3.763938 | -3.320122 | 1.115140  |
| H | 5.902742  | 5.502321  | -0.554568 | H | 0.225506  | 0.937667  | -0.125007 |
| H | 5.814558  | 4.100281  | -1.646358 | H | 2.047020  | 0.800577  | 2.136629  |
| H | 4.368382  | 5.112452  | -1.366029 | H | 3.384290  | 1.531686  | 4.042312  |

B3LYP energy = -1507.78718667 a.u.

(5S,1'R)-10b, Conf. H

|   |           |           |           |   |          |           |           |
|---|-----------|-----------|-----------|---|----------|-----------|-----------|
| C | -2.364390 | 1.297973  | -0.874790 | H | 4.612302 | 2.227549  | 2.990104  |
| C | -2.754874 | 2.633137  | -0.828543 | H | 1.626389 | 3.055391  | 3.003524  |
| C | -3.076121 | 3.218355  | 0.399231  | H | 1.333520 | 3.033171  | 1.260202  |
| C | -2.996261 | 2.451278  | 1.566961  | H | 2.814801 | 3.745634  | 1.895899  |
| C | -2.599747 | 1.127519  | 1.502398  | H | 4.885501 | 2.837253  | 0.829182  |
| C | -2.275489 | 0.524277  | 0.281831  | H | 5.824824 | 2.615651  | -1.429753 |
| C | -1.846556 | -0.926562 | 0.257713  | H | 4.805233 | 1.070441  | -3.046102 |
| C | -2.570164 | -1.793168 | -0.798934 | H | 1.869098 | -1.119074 | -2.307653 |
| C | -4.048837 | -1.942711 | -0.515636 | H | 1.500120 | -0.279021 | -4.568631 |
| C | -5.003444 | -1.267754 | -1.277797 | H | 1.299773 | 1.034770  | -3.400026 |
| C | -6.361955 | -1.412136 | -1.009452 | H | 2.768319 | 0.932075  | -4.373624 |
| C | -6.785883 | -2.234218 | 0.029441  | H | 3.131047 | -2.172406 | -4.118606 |
| C | -5.843217 | -2.915544 | 0.794910  | H | 4.114946 | -2.190283 | -2.649739 |
| C | -4.487251 | -2.771772 | 0.521163  | H | 4.457233 | -1.028384 | -3.929453 |
| N | -0.368211 | -1.060322 | 0.093013  | H | 2.249144 | -2.360413 | -0.756143 |
| C | 0.510970  | -0.095623 | -0.001316 | H | 1.548630 | -4.463627 | 1.390753  |
| N | 1.775228  | -0.478431 | 0.052534  | H | 2.863489 | -4.478575 | 0.206641  |
| C | 2.859945  | 0.400590  | -0.357432 | H | 3.215080 | -4.608776 | 1.929532  |
| C | 3.383481  | 1.329364  | 0.562795  | H | 2.382404 | -1.076572 | 2.863231  |
| C | 2.805204  | 1.560965  | 1.953190  | H | 2.903971 | -2.642436 | 3.466360  |
|   |           |           |           | H | 1.243854 | -2.423632 | 2.943525  |
|   |           |           |           | H | 4.395163 | -1.177850 | 1.194334  |
|   |           |           |           | H | 4.541316 | -2.563301 | 0.112867  |

|   |           |           |           |
|---|-----------|-----------|-----------|
| H | 4.805858  | -2.761891 | 1.843643  |
| H | 0.036441  | -3.053891 | -0.498893 |
| H | 0.059611  | -2.762003 | 1.243146  |
| H | -4.325359 | 4.950294  | -1.296728 |
| H | -3.915397 | 6.309344  | -0.224528 |
| H | -2.621887 | 5.454765  | -1.096966 |

B3LYP energy = -1507.78712480 a.u.

(5*S*,1'*R*)-**10b**, Conf. I

|   |           |           |           |
|---|-----------|-----------|-----------|
| C | -2.339595 | 1.141839  | -1.221435 |
| C | -2.731507 | 2.455474  | -1.406983 |
| C | -3.105227 | 3.243111  | -0.310950 |
| C | -3.076046 | 2.690135  | 0.970677  |
| C | -2.672201 | 1.368687  | 1.138790  |
| C | -2.297432 | 0.572757  | 0.058536  |
| C | -1.856766 | -0.854201 | 0.301990  |
| C | -2.469327 | -1.902130 | -0.657928 |
| C | -3.952711 | -2.098215 | -0.437719 |
| C | -4.405186 | -2.884602 | 0.625838  |
| C | -5.765729 | -3.068292 | 0.849039  |
| C | -6.697807 | -2.469265 | 0.005740  |
| C | -6.259251 | -1.690238 | -1.060160 |
| C | -4.896698 | -1.506570 | -1.278778 |
| N | -0.369189 | -0.981159 | 0.301530  |
| C | 0.515926  | -0.103967 | -0.095310 |
| N | 1.775071  | -0.431740 | 0.138278  |
| C | 2.882552  | 0.259862  | -0.501413 |
| C | 3.440420  | -0.302056 | -1.666548 |
| C | 2.859722  | -1.517814 | -2.382334 |
| C | 2.342096  | -1.131738 | -3.780278 |
| C | 3.860785  | -2.681187 | -2.471383 |
| C | 4.549306  | 0.334086  | -2.225654 |
| C | 5.057120  | 1.504061  | -1.683345 |
| C | 4.443710  | 2.078240  | -0.581069 |
| C | 3.343536  | 1.478555  | 0.034576  |
| C | 2.671812  | 2.197814  | 1.197969  |
| C | 3.653873  | 2.556215  | 2.325159  |
| C | 1.932474  | 3.456147  | 0.705079  |
| C | 1.830736  | -1.787782 | 0.805963  |
| C | 2.617327  | -1.908743 | 2.143250  |
| C | 4.106465  | -1.592027 | 1.923263  |
| C | 2.509164  | -3.387666 | 2.574098  |
| C | 2.052950  | -1.014945 | 3.256850  |
| C | 0.318401  | -2.134637 | 0.915774  |
| C | -3.890166 | 5.368693  | 0.476298  |
| O | -3.479289 | 4.515307  | -0.594560 |
| H | -2.069115 | 0.559368  | -2.093720 |
| H | -2.765647 | 2.890293  | -2.397472 |
| H | -3.367709 | 3.267902  | 1.835544  |
| H | -2.662495 | 0.953047  | 2.139858  |
| H | -2.151047 | -1.123104 | 1.319344  |
| H | -2.270752 | -1.611274 | -1.690054 |
| H | -1.962081 | -2.855523 | -0.498453 |
| H | -3.687127 | -3.369057 | 1.279169  |
| H | -6.097890 | -3.685057 | 1.675188  |

|   |           |           |           |
|---|-----------|-----------|-----------|
| H | -7.757555 | -2.614027 | 0.175228  |
| H | -6.977299 | -1.225864 | -1.724953 |
| H | -4.567348 | -0.899491 | -2.113429 |
| H | 0.243167  | 0.818082  | -0.585695 |
| H | 1.992776  | -1.872685 | -1.825760 |
| H | 1.868627  | -1.993430 | -4.255588 |
| H | 1.606156  | -0.327049 | -3.723363 |
| H | 3.153213  | -0.796968 | -4.429226 |
| H | 3.390763  | -3.547420 | -2.941554 |
| H | 4.220694  | -2.982855 | -1.485981 |
| H | 4.731187  | -2.410776 | -3.072108 |
| H | 5.009727  | -0.081790 | -3.112601 |
| H | 5.918168  | 1.981768  | -2.134005 |
| H | 4.826040  | 3.012684  | -0.191577 |
| H | 1.921591  | 1.532303  | 1.622697  |
| H | 3.109680  | 2.981369  | 3.171008  |
| H | 4.199622  | 1.681074  | 2.680831  |
| H | 4.385668  | 3.298050  | 2.000970  |
| H | 1.403415  | 3.931707  | 1.533696  |
| H | 1.202671  | 3.219639  | -0.072133 |
| H | 2.631262  | 4.185270  | 0.290296  |
| H | 2.309489  | -2.467057 | 0.102722  |
| H | 4.535648  | -2.218550 | 1.138259  |
| H | 4.276289  | -0.551869 | 1.652680  |
| H | 4.659218  | -1.789796 | 2.843467  |
| H | 1.483400  | -3.685761 | 2.799110  |
| H | 3.098253  | -3.545453 | 3.478615  |
| H | 2.898390  | -4.057186 | 1.803362  |
| H | 1.011542  | -1.243668 | 3.491617  |
| H | 2.119840  | 0.042423  | 3.005919  |
| H | 2.626710  | -1.170181 | 4.172112  |
| H | 0.068104  | -3.050577 | 0.384570  |
| H | -0.015732 | -2.232110 | 1.947440  |
| H | -3.082019 | 5.515412  | 1.196977  |
| H | -4.140192 | 6.320037  | 0.014677  |
| H | -4.770515 | 4.968392  | 0.984536  |

B3LYP energy = -1507.78710982 a.u.

(5*S*,1'*R*)-**10b**, Conf. J

|   |           |           |           |
|---|-----------|-----------|-----------|
| C | 3.241840  | 1.056068  | 0.874730  |
| C | 4.043617  | 2.190677  | 0.775473  |
| C | 4.213304  | 2.812223  | -0.463156 |
| C | 3.576238  | 2.280374  | -1.590333 |
| C | 2.780543  | 1.155643  | -1.471312 |
| C | 2.593861  | 0.521671  | -0.236614 |
| C | 1.679566  | -0.687203 | -0.154740 |
| C | 2.178968  | -1.854498 | 0.727529  |
| C | 3.392099  | -2.545120 | 0.143822  |
| C | 3.244729  | -3.446798 | -0.914505 |
| C | 4.350787  | -4.078835 | -1.472544 |
| C | 5.625777  | -3.821968 | -0.975552 |
| C | 5.784062  | -2.933304 | 0.082889  |
| C | 4.674745  | -2.300437 | 0.636849  |
| N | 0.311365  | -0.282364 | 0.267035  |
| C | -0.770421 | -0.397740 | -0.457568 |

|   |           |           |           |                                                  |           |           |           |
|---|-----------|-----------|-----------|--------------------------------------------------|-----------|-----------|-----------|
| N | -1.887548 | -0.011199 | 0.132454  | H                                                | -2.507077 | -2.111851 | 3.709719  |
| C | -3.131209 | 0.167712  | -0.597598 | H                                                | -0.952023 | -1.922054 | 2.918163  |
| C | -3.896147 | -0.963034 | -0.948025 | H                                                | -4.268923 | -0.466578 | 1.753099  |
| C | -3.450195 | -2.398807 | -0.696226 | H                                                | -4.069062 | 1.089608  | 2.557888  |
| C | -4.503436 | -3.224036 | 0.060580  | H                                                | -4.315647 | -0.372068 | 3.509932  |
| C | -3.070408 | -3.093459 | -2.017450 | H                                                | 0.483638  | 1.291939  | 1.653263  |
| C | -5.105729 | -0.744020 | -1.609610 | H                                                | 0.312111  | -0.313350 | 2.372733  |
| C | -5.540365 | 0.535967  | -1.915819 | H                                                | 6.370629  | 3.812576  | 0.873740  |
| C | -4.745537 | 1.628293  | -1.605670 | H                                                | 6.186005  | 5.365831  | 0.027026  |
| C | -3.515436 | 1.472332  | -0.965467 | H                                                | 4.949781  | 4.848232  | 1.196802  |
| C | -2.638095 | 2.703746  | -0.763461 | B3LYP energy = -1507.78701018 a.u.               |           |           |           |
| C | -2.265824 | 3.342567  | -2.114164 | (5 <i>S</i> ,1' <i>R</i> )- <b>10b</b> , Conf. K |           |           |           |
| C | -3.291221 | 3.740845  | 0.165204  |                                                  |           |           |           |
| C | -1.573706 | 0.480550  | 1.530044  |                                                  |           |           |           |
| C | -2.310735 | -0.202697 | 2.718454  | C                                                | 3.460458  | -1.112301 | -0.944239 |
| C | -1.812789 | 0.504120  | 3.997985  | C                                                | 4.695888  | -0.504308 | -0.744797 |
| C | -2.018145 | -1.706429 | 2.822286  | C                                                | 5.119615  | -0.215573 | 0.554689  |
| C | -3.828742 | 0.026091  | 2.617781  | C                                                | 4.295165  | -0.550847 | 1.634540  |
| C | -0.023579 | 0.332501  | 1.565210  | C                                                | 3.070096  | -1.158260 | 1.417616  |
| C | 5.653913  | 4.509532  | 0.432587  | C                                                | 2.625155  | -1.445819 | 0.121078  |
| O | 4.970980  | 3.918396  | -0.674654 | C                                                | 1.282778  | -2.093226 | -0.163732 |
| H | 3.142576  | 0.591199  | 1.847669  | C                                                | 0.855541  | -3.143532 | 0.887328  |
| H | 4.531299  | 2.570554  | 1.661342  | C                                                | -0.380510 | -3.937683 | 0.529959  |
| H | 3.723964  | 2.759864  | -2.549298 | C                                                | -1.584355 | -3.734328 | 1.207869  |
| H | 2.302662  | 0.756881  | -2.359049 | C                                                | -2.723796 | -4.463616 | 0.875343  |
| H | 1.548475  | -1.075026 | -1.165289 | C                                                | -2.673621 | -5.410190 | -0.142614 |
| H | 2.400334  | -1.501617 | 1.735516  | C                                                | -1.476124 | -5.628999 | -0.819834 |
| H | 1.359470  | -2.572224 | 0.816852  | C                                                | -0.340152 | -4.900825 | -0.483598 |
| H | 2.255162  | -3.667014 | -1.300725 | N                                                | 0.215671  | -1.068185 | -0.369735 |
| H | 4.216724  | -4.777080 | -2.289708 | C                                                | 0.130078  | 0.105254  | 0.199231  |
| H | 6.487953  | -4.315506 | -1.406567 | N                                                | -0.869971 | 0.862146  | -0.219641 |
| H | 6.771380  | -2.732618 | 0.480471  | C                                                | -1.284890 | 2.049998  | 0.508728  |
| H | 4.810171  | -1.611317 | 1.461729  | C                                                | -0.628547 | 3.273025  | 0.271034  |
| H | -0.755100 | -0.768223 | -1.473055 | C                                                | 0.588191  | 3.418417  | -0.635314 |
| H | -2.553841 | -2.375498 | -0.077828 | C                                                | 0.402603  | 4.505927  | -1.705973 |
| H | -4.107945 | -4.217027 | 0.283836  | C                                                | 1.857111  | 3.692795  | 0.193957  |
| H | -4.785330 | -2.753295 | 1.003424  | C                                                | -1.096079 | 4.398046  | 0.953111  |
| H | -5.410535 | -3.357460 | -0.531120 | C                                                | -2.159568 | 4.316441  | 1.838154  |
| H | -2.703467 | -4.103078 | -1.820704 | C                                                | -2.751615 | 3.090027  | 2.097084  |
| H | -2.291510 | -2.548588 | -2.555425 | C                                                | -2.316605 | 1.927264  | 1.460227  |
| H | -3.933511 | -3.174176 | -2.680870 | C                                                | -2.923546 | 0.592465  | 1.881542  |
| H | -5.717314 | -1.591615 | -1.890433 | C                                                | -2.585482 | 0.285157  | 3.352135  |
| H | -6.489408 | 0.680709  | -2.416861 | C                                                | -4.441238 | 0.532573  | 1.644809  |
| H | -5.074789 | 2.620433  | -1.886760 | C                                                | -1.699357 | 0.086763  | -1.221818 |
| H | -1.699283 | 2.393624  | -0.305492 | C                                                | -2.073438 | 0.776672  | -2.563999 |
| H | -1.578565 | 4.176073  | -1.955258 | C                                                | -0.849827 | 1.183597  | -3.397101 |
| H | -1.780401 | 2.623093  | -2.776097 | C                                                | -2.963975 | 2.005706  | -2.312035 |
| H | -3.146108 | 3.730807  | -2.629312 | C                                                | -2.905279 | -0.254588 | -3.357546 |
| H | -2.614911 | 4.583201  | 0.324195  | C                                                | -0.852200 | -1.206039 | -1.381655 |
| H | -3.539333 | 3.315916  | 1.139371  | C                                                | 7.194095  | 0.732264  | -0.188475 |
| H | -4.213456 | 4.132701  | -0.267907 | O                                                | 6.300744  | 0.373316  | 0.868088  |
| H | -1.840774 | 1.535033  | 1.562990  | H                                                | 3.151461  | -1.335704 | -1.959338 |
| H | -0.749513 | 0.340355  | 4.182310  | H                                                | 5.314852  | -0.271732 | -1.599114 |
| H | -1.989575 | 1.581416  | 3.952986  | H                                                | 4.636732  | -0.334371 | 2.638421  |
| H | -2.354109 | 0.114969  | 4.861381  | H                                                | 2.465644  | -1.413717 | 2.278700  |
| H | -2.399362 | -2.255146 | 1.962484  | H                                                | 1.354868  | -2.592891 | -1.130855 |

|                                                  |           |           |           |   |           |           |           |
|--------------------------------------------------|-----------|-----------|-----------|---|-----------|-----------|-----------|
| H                                                | 1.704271  | -3.820730 | 1.006957  | C | -2.865969 | 4.171651  | -1.084254 |
| H                                                | 0.704818  | -2.652408 | 1.849932  | C | -1.667061 | 3.503112  | -1.320654 |
| H                                                | -1.629575 | -3.009571 | 2.012890  | N | 0.164060  | 1.109085  | 0.439900  |
| H                                                | -3.646551 | -4.298324 | 1.417985  | C | 0.060566  | -0.018385 | -0.212974 |
| H                                                | -3.556696 | -5.981733 | -0.399665 | N | -0.892603 | -0.827807 | 0.213257  |
| H                                                | -1.424662 | -6.375541 | -1.602896 | C | -1.318838 | -1.996800 | -0.536634 |
| H                                                | 0.589881  | -5.092881 | -1.007473 | C | -0.520931 | -3.158655 | -0.525082 |
| H                                                | 0.820713  | 0.437931  | 0.959582  | C | 0.845986  | -3.241501 | 0.143277  |
| H                                                | 0.743177  | 2.472132  | -1.152741 | C | 0.973257  | -4.440040 | 1.097331  |
| H                                                | 1.258921  | 4.511252  | -2.383495 | C | 1.966543  | -3.272990 | -0.913587 |
| H                                                | -0.497184 | 4.341634  | -2.300379 | C | -0.995672 | -4.274430 | -1.216435 |
| H                                                | 0.331015  | 5.499289  | -1.259888 | C | -2.203399 | -4.244815 | -1.895520 |
| H                                                | 2.729967  | 3.743033  | -0.460419 | C | -2.943692 | -3.073897 | -1.936016 |
| H                                                | 2.035540  | 2.912323  | 0.936144  | C | -2.511950 | -1.919496 | -1.281576 |
| H                                                | 1.782023  | 4.643668  | 0.725427  | C | -3.315621 | -0.635620 | -1.463693 |
| H                                                | -0.616565 | 5.354341  | 0.789927  | C | -3.340824 | -0.209621 | -2.943524 |
| H                                                | -2.512286 | 5.206275  | 2.344665  | C | -4.744478 | -0.753634 | -0.908513 |
| H                                                | -3.551887 | 3.030226  | 2.823472  | C | -1.604865 | -0.194895 | 1.391081  |
| H                                                | -2.469072 | -0.203794 | 1.292227  | C | -1.630927 | -0.993779 | 2.727199  |
| H                                                | -2.963419 | -0.702030 | 3.626302  | C | -0.227825 | -1.270413 | 3.287257  |
| H                                                | -1.506814 | 0.297394  | 3.521458  | C | -2.392853 | -2.319049 | 2.555215  |
| H                                                | -3.037478 | 1.014821  | 4.026228  | C | -2.419057 | -0.126446 | 3.732894  |
| H                                                | -4.824328 | -0.454857 | 1.910461  | C | -0.879903 | 1.179743  | 1.481285  |
| H                                                | -4.696440 | 0.726240  | 0.601405  | C | 7.033798  | -0.446904 | -1.311317 |
| H                                                | -4.968812 | 1.266794  | 2.256454  | O | 6.318412  | -0.300295 | -0.082741 |
| H                                                | -2.638959 | -0.155157 | -0.725285 | H | 2.754321  | 1.137585  | 2.193311  |
| H                                                | -0.229169 | 1.914291  | -2.881797 | H | 4.967166  | 0.067202  | 2.025936  |
| H                                                | -0.221715 | 0.331506  | -3.664472 | H | 4.946341  | 0.717957  | -2.216198 |
| H                                                | -1.183647 | 1.637993  | -4.331442 | H | 2.769131  | 1.775172  | -2.052297 |
| H                                                | -3.849003 | 1.742699  | -1.728657 | H | 1.195629  | 2.717157  | 1.175093  |
| H                                                | -3.306763 | 2.407611  | -3.267270 | H | 1.615125  | 3.856193  | -0.988676 |
| H                                                | -2.438414 | 2.801372  | -1.787148 | H | 0.739732  | 2.596479  | -1.838784 |
| H                                                | -3.782143 | -0.579865 | -2.792678 | H | 0.341969  | 5.238852  | 0.783527  |
| H                                                | -2.326349 | -1.139719 | -3.628215 | H | -1.777730 | 6.417854  | 1.208536  |
| H                                                | -3.257104 | 0.199705  | -4.284931 | H | -3.842758 | 5.742418  | 0.012641  |
| H                                                | -1.429176 | -2.107720 | -1.197482 | H | -3.759826 | 3.880903  | -1.622584 |
| H                                                | -0.389111 | -1.281323 | -2.364916 | H | -1.638124 | 2.698330  | -2.047054 |
| H                                                | 6.735542  | 1.458744  | -0.863828 | H | 0.704951  | -0.276845 | -1.040483 |
| H                                                | 8.056485  | 1.182457  | 0.295564  | H | 0.991967  | -2.340960 | 0.737893  |
| H                                                | 7.512122  | -0.147461 | -0.753118 | H | 1.935185  | -4.403370 | 1.612539  |
| B3LYP energy = -1507.78695742 a.u.               |           |           |           | H | 0.185344  | -4.441289 | 1.851945  |
| (5 <i>S</i> ,1' <i>R</i> )- <b>10b</b> , Conf. L |           |           |           | H | 0.924823  | -5.389253 | 0.560961  |
| C                                                | 3.227883  | 1.041532  | 1.222452  | H | 2.944041  | -3.269601 | -0.427142 |
| C                                                | 4.467377  | 0.437796  | 1.140314  | H | 1.919399  | -2.411222 | -1.582898 |
| C                                                | 5.104599  | 0.306048  | -0.100993 | H | 1.899557  | -4.172085 | -1.529579 |
| C                                                | 4.476855  | 0.794943  | -1.246319 | H | -0.407560 | -5.182610 | -1.222200 |
| C                                                | 3.223996  | 1.400071  | -1.144972 | H | -2.557070 | -5.128515 | -2.411938 |
| C                                                | 2.577481  | 1.531479  | 0.080274  | H | -3.864531 | -3.048350 | -2.504211 |
| C                                                | 1.203149  | 2.161208  | 0.236007  | H | -2.816467 | 0.169073  | -0.924924 |
| C                                                | 0.800558  | 3.135329  | -0.891619 | H | -3.855335 | 0.747983  | -3.047528 |
| C                                                | -0.499769 | 3.866068  | -0.645401 | H | -2.331044 | -0.098443 | -3.344027 |
| C                                                | -0.558029 | 4.925538  | 0.265507  | H | -3.867653 | -0.938521 | -3.561694 |
| C                                                | -1.753384 | 5.594991  | 0.504661  | H | -5.268990 | 0.198219  | -1.014496 |
| C                                                | -2.913034 | 5.217553  | -0.168199 | H | -4.749364 | -1.027909 | 0.147879  |
|                                                  |           |           |           | H | -5.317528 | -1.509587 | -1.448661 |
|                                                  |           |           |           | H | -2.640739 | -0.043157 | 1.094653  |

|   |           |           |           |
|---|-----------|-----------|-----------|
| H | 0.346992  | -1.931626 | 2.640673  |
| H | 0.352717  | -0.358050 | 3.439807  |
| H | -0.314355 | -1.759728 | 4.258834  |
| H | -3.405152 | -2.151399 | 2.181413  |
| H | -2.477598 | -2.817321 | 3.522792  |
| H | -1.891450 | -3.003573 | 1.873813  |
| H | -3.423381 | 0.096669  | 3.365023  |
| H | -1.920545 | 0.818613  | 3.955789  |
| H | -2.522939 | -0.667832 | 4.674291  |
| H | -1.544177 | 2.017418  | 1.278625  |
| H | -0.406054 | 1.338832  | 2.447579  |
| H | 7.256841  | 0.525640  | -1.756685 |
| H | 7.962550  | -0.948496 | -1.053264 |
| H | 6.475290  | -1.059536 | -2.023248 |

B3LYP energy = -1507.78689540 a.u.

(R)-**17a**, Conf. A

|    |           |           |           |
|----|-----------|-----------|-----------|
| C  | 0.802542  | 0.524549  | 2.281369  |
| C  | 2.321483  | 0.405587  | 2.025083  |
| N  | 2.379808  | -0.065437 | 0.616865  |
| C  | 1.159626  | -0.206170 | 0.139062  |
| N  | 0.209022  | 0.092475  | 0.991631  |
| C  | 3.606918  | -0.329753 | -0.094675 |
| C  | -1.253410 | 0.086283  | 0.787834  |
| C  | 4.214601  | 0.722207  | -0.803123 |
| C  | 5.405338  | 0.440838  | -1.475081 |
| C  | 5.968442  | -0.826707 | -1.436776 |
| C  | 5.352019  | -1.844100 | -0.722657 |
| C  | 4.160236  | -1.621038 | -0.031068 |
| C  | 3.621044  | 2.122469  | -0.875694 |
| C  | 3.508977  | -2.764083 | 0.735455  |
| C  | 4.594076  | 3.185681  | -0.339720 |
| C  | 3.165197  | 2.462649  | -2.305268 |
| C  | 3.001587  | -3.858892 | -0.219918 |
| C  | 4.453046  | -3.354197 | 1.795935  |
| C  | -1.643200 | -0.736665 | -0.459218 |
| C  | -1.796688 | 1.508471  | 0.778282  |
| C  | -3.134498 | -0.968801 | -0.550822 |
| C  | -1.357312 | 2.441120  | -0.164191 |
| C  | -1.876434 | 3.730731  | -0.174221 |
| C  | -2.843210 | 4.103226  | 0.757478  |
| C  | -3.284383 | 3.180550  | 1.699905  |
| C  | -2.760047 | 1.890192  | 1.710982  |
| C  | -3.925616 | -0.229304 | -1.430577 |
| C  | -5.299361 | -0.436185 | -1.512662 |
| C  | -5.882119 | -1.397993 | -0.700922 |
| C  | -5.123329 | -2.153971 | 0.182364  |
| C  | -3.752171 | -1.933461 | 0.248865  |
| Cl | -7.628592 | -1.672665 | -0.796918 |
| H  | 0.455448  | -0.133989 | 3.076319  |
| H  | 0.492077  | 1.544079  | 2.502451  |
| H  | 2.840688  | 1.357701  | 2.115950  |
| H  | 2.802280  | -0.322066 | 2.676177  |
| H  | 0.978381  | -0.541302 | -0.870635 |

|   |           |           |           |
|---|-----------|-----------|-----------|
| H | -1.658311 | -0.424044 | 1.663891  |
| H | 5.898350  | 1.223454  | -2.037432 |
| H | 6.892418  | -1.022811 | -1.966948 |
| H | 5.803464  | -2.827637 | -0.702993 |
| H | 2.733907  | 2.152042  | -0.242740 |
| H | 2.639418  | -2.371382 | 1.263291  |
| H | 4.111203  | 4.165162  | -0.336130 |
| H | 4.909368  | 2.959408  | 0.680716  |
| H | 5.489176  | 3.259264  | -0.960748 |
| H | 2.689195  | 3.445396  | -2.324020 |
| H | 2.447213  | 1.730259  | -2.679477 |
| H | 4.011411  | 2.487462  | -2.995202 |
| H | 2.488062  | -4.640785 | 0.343699  |
| H | 2.303129  | -3.455174 | -0.955380 |
| H | 3.827683  | -4.324082 | -0.762254 |
| H | 3.929196  | -4.113753 | 2.380091  |
| H | 4.811600  | -2.585070 | 2.482621  |
| H | 5.323027  | -3.829858 | 1.338363  |
| H | -1.301686 | -0.228792 | -1.362730 |
| H | -1.133717 | -1.701840 | -0.407076 |
| H | -0.606154 | 2.168207  | -0.896426 |
| H | -1.527345 | 4.444986  | -0.909576 |
| H | -3.247067 | 5.107983  | 0.748686  |
| H | -4.032913 | 3.462929  | 2.429737  |
| H | -3.103898 | 1.176651  | 2.450685  |
| H | -3.469622 | 0.519934  | -2.065893 |
| H | -5.902134 | 0.141470  | -2.200010 |
| H | -5.590369 | -2.906083 | 0.803422  |
| H | -3.159348 | -2.531095 | 0.931562  |

B3LYP energy = -1695.55709368 a.u.

(R)-**17a**, Conf. B

|   |           |           |           |
|---|-----------|-----------|-----------|
| C | -1.118527 | 0.769577  | 1.815826  |
| C | -1.039647 | -0.770358 | 1.930716  |
| N | -0.737238 | -1.191238 | 0.538040  |
| C | -0.587433 | -0.128461 | -0.224586 |
| N | -0.755387 | 1.014721  | 0.397870  |
| C | -0.636440 | -2.567897 | 0.117037  |
| C | -0.714884 | 2.348480  | -0.243523 |
| C | 0.615023  | -3.205792 | 0.176314  |
| C | 0.674832  | -4.541433 | -0.225561 |
| C | -0.459863 | -5.212274 | -0.657986 |
| C | -1.684080 | -4.560515 | -0.699363 |
| C | -1.804306 | -3.225502 | -0.310383 |
| C | 1.884003  | -2.500312 | 0.634136  |
| C | -3.161850 | -2.539232 | -0.382448 |
| C | 2.532913  | -3.209870 | 1.834127  |
| C | 2.885146  | -2.349851 | -0.524618 |
| C | -3.625495 | -2.375189 | -1.840529 |
| C | -4.222955 | -3.274368 | 0.453059  |
| C | 0.435204  | 3.210870  | 0.318664  |
| C | -2.083337 | 3.015644  | -0.177327 |
| C | 1.812311  | 2.644046  | 0.062159  |
| C | -2.470715 | 3.824784  | 0.893015  |
| C | -3.737686 | 4.401713  | 0.920325  |



|                                    |           |           |           |    |           |           |           |
|------------------------------------|-----------|-----------|-----------|----|-----------|-----------|-----------|
| C                                  | -4.631146 | 4.180956  | -0.122916 | C  | -6.079784 | -0.977889 | -1.264444 |
| C                                  | -4.252328 | 3.379045  | -1.196146 | C  | -5.589121 | 0.319299  | -1.304358 |
| C                                  | -2.987651 | 2.801066  | -1.220545 | C  | -4.364020 | 0.645825  | -0.720612 |
| C                                  | 2.364555  | 2.668385  | -1.222004 | C  | -3.349825 | -2.840244 | 0.633915  |
| C                                  | 3.632902  | 2.157769  | -1.472102 | C  | -3.854690 | 2.079066  | -0.791509 |
| C                                  | 4.359278  | 1.618020  | -0.418874 | C  | -4.164104 | -3.505317 | 1.756122  |
| C                                  | 3.844101  | 1.581219  | 0.867732  | C  | -2.874971 | -3.881659 | -0.394591 |
| C                                  | 2.571093  | 2.095893  | 1.097207  | C  | -3.532264 | 2.485366  | -2.240133 |
| Cl                                 | 5.978141  | 0.970691  | -0.725141 | C  | -4.839311 | 3.069491  | -0.147766 |
| H                                  | -2.119253 | 1.152683  | 2.006439  | C  | 2.050438  | -0.769069 | 1.096013  |
| H                                  | -0.415602 | 1.269307  | 2.478403  | C  | 1.752509  | 1.684469  | 0.312107  |
| H                                  | -0.240879 | -1.100127 | 2.592901  | C  | 3.420312  | -1.005679 | 0.501024  |
| H                                  | -1.976356 | -1.217138 | 2.257038  | C  | 1.823153  | 2.396564  | -0.887473 |
| H                                  | -0.349909 | -0.196711 | -1.276587 | C  | 2.286387  | 3.708159  | -0.911414 |
| H                                  | -0.499893 | 2.144749  | -1.292335 | C  | 2.682911  | 4.327931  | 0.269810  |
| H                                  | 1.622619  | -5.063771 | -0.201121 | C  | 2.617452  | 3.627251  | 1.470535  |
| H                                  | -0.389685 | -6.248498 | -0.965523 | C  | 2.159207  | 2.313315  | 1.491474  |
| H                                  | -2.559696 | -5.097155 | -1.041478 | C  | 4.566744  | -0.449977 | 1.070557  |
| H                                  | 1.619385  | -1.494400 | 0.961042  | C  | 5.825498  | -0.665362 | 0.516949  |
| H                                  | -3.063061 | -1.537629 | 0.036555  | C  | 5.932003  | -1.448672 | -0.622470 |
| H                                  | 3.393031  | -2.636109 | 2.185368  | C  | 4.812944  | -2.020708 | -1.212285 |
| H                                  | 1.831195  | -3.312592 | 2.664102  | C  | 3.564796  | -1.795316 | -0.643129 |
| H                                  | 2.886696  | -4.207652 | 1.566698  | Cl | 7.527798  | -1.732291 | -1.335610 |
| H                                  | 3.764894  | -1.795351 | -0.192147 | H  | -0.457526 | 1.605298  | 2.284830  |
| H                                  | 2.443388  | -1.812139 | -1.365955 | H  | -0.243824 | -0.074862 | 2.813091  |
| H                                  | 3.219671  | -3.324623 | -0.886216 | H  | -2.583261 | -0.456689 | 2.594110  |
| H                                  | -4.574160 | -1.835187 | -1.875185 | H  | -2.805113 | 1.235957  | 2.122696  |
| H                                  | -2.895794 | -1.818009 | -2.431158 | H  | -1.073620 | -0.403059 | -1.099500 |
| H                                  | -3.774048 | -3.345968 | -2.318378 | H  | 1.207811  | -0.070366 | -0.747733 |
| H                                  | -5.158557 | -2.711237 | 0.445371  | H  | -5.750368 | -2.988032 | -0.616506 |
| H                                  | -3.904473 | -3.388972 | 1.490924  | H  | -7.032854 | -1.208650 | -1.724498 |
| H                                  | -4.431714 | -4.268575 | 0.052697  | H  | -6.166550 | 1.090430  | -1.797963 |
| H                                  | 0.345206  | 4.190346  | -0.155614 | H  | -2.456932 | -2.416689 | 1.094453  |
| H                                  | 0.298480  | 3.372125  | 1.388251  | H  | -2.924201 | 2.140427  | -0.226995 |
| H                                  | -1.790844 | 4.018567  | 1.712635  | H  | -3.552198 | -4.249832 | 2.269743  |
| H                                  | -4.022776 | 5.026917  | 1.757308  | H  | -4.498191 | -2.773468 | 2.494057  |
| H                                  | -5.614791 | 4.633375  | -0.101964 | H  | -5.046274 | -4.015223 | 1.363721  |
| H                                  | -4.938425 | 3.206660  | -2.016068 | H  | -2.277070 | -4.651558 | 0.097952  |
| H                                  | -2.699512 | 2.181417  | -2.062230 | H  | -2.262306 | -3.422424 | -1.172831 |
| H                                  | 1.806346  | 3.102038  | -2.043663 | H  | -3.721133 | -4.373331 | -0.879442 |
| H                                  | 4.051414  | 2.187710  | -2.468832 | H  | -3.113348 | 3.493663  | -2.263646 |
| H                                  | 4.422930  | 1.164308  | 1.680441  | H  | -2.808043 | 1.805530  | -2.693069 |
| H                                  | 2.176048  | 2.077027  | 2.105879  | H  | -4.430895 | 2.481128  | -2.860956 |
| B3LYP energy = -1695.55708698 a.u. |           |           |           | H  | -4.408912 | 4.073162  | -0.143761 |
| (R)-17a, Conf. C                   |           |           |           | H  | -5.065573 | 2.793134  | 0.883802  |
| C                                  | -0.700676 | 0.568061  | 2.063715  | H  | -5.780891 | 3.114744  | -0.698954 |
| C                                  | -2.224882 | 0.334259  | 1.937774  | H  | 2.149602  | -0.449251 | 2.133453  |
| N                                  | -2.379578 | -0.082027 | 0.519369  | H  | 1.489819  | -1.706338 | 1.102565  |
| C                                  | -1.199800 | -0.119615 | -0.064086 | H  | 1.517569  | 1.920554  | -1.812188 |
| N                                  | -0.197623 | 0.214247  | 0.713258  | H  | 2.339434  | 4.242756  | -1.851679 |
| C                                  | -3.645607 | -0.391770 | -0.099978 | H  | 3.044277  | 5.348652  | 0.254764  |
| C                                  | 1.221847  | 0.258697  | 0.290747  | H  | 2.927881  | 4.100817  | 2.393604  |
| C                                  | -4.122678 | -1.713260 | -0.037492 | H  | 2.130055  | 1.786397  | 2.436791  |
| C                                  | -5.354099 | -1.980867 | -0.637751 | H  | 4.485938  | 0.158378  | 1.962849  |
|                                    |           |           |           | H  | 6.706475  | -0.231418 | 0.969871  |
|                                    |           |           |           | H  | 4.911906  | -2.637132 | -2.095341 |

H 2.693941 -2.253390 -1.097805  
B3LYP energy = -1695.55640775 a.u.

(R)-17a, Conf. D

|    |           |           |           |
|----|-----------|-----------|-----------|
| C  | 0.473698  | -0.709165 | 2.263171  |
| C  | 2.007385  | -0.862147 | 2.159959  |
| N  | 2.294897  | -0.339841 | 0.799780  |
| C  | 1.167184  | -0.048765 | 0.183884  |
| N  | 0.088997  | -0.257579 | 0.901293  |
| C  | 3.619840  | -0.234074 | 0.238017  |
| C  | -1.317939 | 0.069991  | 0.554576  |
| C  | 4.344269  | 0.953416  | 0.444614  |
| C  | 5.626620  | 1.027260  | -0.101586 |
| C  | 6.165367  | -0.034331 | -0.814431 |
| C  | 5.431658  | -1.197675 | -0.996683 |
| C  | 4.144507  | -1.328529 | -0.472303 |
| C  | 3.781555  | 2.144297  | 1.208888  |
| C  | 3.369639  | -2.620604 | -0.693057 |
| C  | 4.673633  | 2.537615  | 2.397870  |
| C  | 3.547326  | 3.344895  | 0.275347  |
| C  | 3.054091  | -2.837819 | -2.183095 |
| C  | 4.105636  | -3.834540 | -0.101499 |
| C  | -2.167111 | -1.223290 | 0.525092  |
| C  | -1.405989 | 0.911123  | -0.705816 |
| C  | -3.652691 | -0.947093 | 0.484730  |
| C  | -1.291053 | 0.352713  | -1.982060 |
| C  | -1.370549 | 1.156739  | -3.114780 |
| C  | -1.574004 | 2.527966  | -2.987810 |
| C  | -1.693495 | 3.092452  | -1.721753 |
| C  | -1.607678 | 2.288070  | -0.589614 |
| C  | -4.316950 | -0.475193 | 1.620598  |
| C  | -5.682060 | -0.212403 | 1.601742  |
| C  | -6.391158 | -0.431180 | 0.428381  |
| C  | -5.765222 | -0.906343 | -0.714252 |
| C  | -4.397090 | -1.159996 | -0.676144 |
| Cl | -8.131250 | -0.104187 | 0.393349  |
| H  | -0.017837 | -1.647081 | 2.507948  |
| H  | 0.173682  | 0.049495  | 2.985925  |
| H  | 2.541556  | -0.277445 | 2.905619  |
| H  | 2.329283  | -1.900377 | 2.227486  |
| H  | 1.140433  | 0.333597  | -0.824914 |
| H  | -1.670364 | 0.684876  | 1.385770  |
| H  | 6.211205  | 1.928711  | 0.030633  |
| H  | 7.162424  | 0.045543  | -1.230074 |
| H  | 5.865074  | -2.017261 | -1.555536 |
| H  | 2.810593  | 1.861928  | 1.616113  |
| H  | 2.414713  | -2.542088 | -0.172926 |
| H  | 4.203884  | 3.344314  | 2.964427  |
| H  | 4.831704  | 1.695205  | 3.073966  |
| H  | 5.651823  | 2.891611  | 2.066204  |
| H  | 3.096354  | 4.170257  | 0.830581  |
| H  | 2.880115  | 3.084889  | -0.548663 |
| H  | 4.486762  | 3.702179  | -0.152195 |
| H  | 2.448169  | -3.737323 | -2.311637 |
| H  | 2.501992  | -1.993545 | -2.600626 |

|   |           |           |           |
|---|-----------|-----------|-----------|
| H | 3.968147  | -2.963802 | -2.767555 |
| H | 3.491354  | -4.731342 | -0.206440 |
| H | 4.319999  | -3.692271 | 0.959457  |
| H | 5.052090  | -4.018282 | -0.614202 |
| H | -1.871989 | -1.835122 | -0.327394 |
| H | -1.941674 | -1.803656 | 1.421356  |
| H | -1.137472 | -0.712016 | -2.105673 |
| H | -1.278419 | 0.709285  | -4.096492 |
| H | -1.641274 | 3.151473  | -3.870567 |
| H | -1.856136 | 4.157490  | -1.613363 |
| H | -1.703326 | 2.734395  | 0.393256  |
| H | -3.769267 | -0.316889 | 2.542535  |
| H | -6.185067 | 0.149377  | 2.488172  |
| H | -6.331074 | -1.078926 | -1.619610 |
| H | -3.909981 | -1.534440 | -1.567944 |

B3LYP energy = -1695.55594142 a.u.

(R)-17a, Conf. E

|    |           |           |           |
|----|-----------|-----------|-----------|
| C  | 1.506407  | -0.077981 | 2.125364  |
| C  | 0.818928  | -1.458320 | 2.046480  |
| N  | 0.144237  | -1.411391 | 0.723246  |
| C  | 0.446797  | -0.287110 | 0.105292  |
| N  | 1.219701  | 0.516440  | 0.796141  |
| C  | -0.666607 | -2.480548 | 0.192131  |
| C  | 1.772887  | 1.831431  | 0.421714  |
| C  | -0.055272 | -3.461186 | -0.610084 |
| C  | -0.866891 | -4.483544 | -1.104983 |
| C  | -2.220439 | -4.534927 | -0.804868 |
| C  | -2.794774 | -3.562021 | 0.000642  |
| C  | -2.033713 | -2.513970 | 0.520437  |
| C  | 1.427869  | -3.446867 | -0.955661 |
| C  | -2.701764 | -1.462664 | 1.396761  |
| C  | 2.133772  | -4.727208 | -0.478370 |
| C  | 1.652530  | -3.221975 | -2.461150 |
| C  | -3.746153 | -0.655658 | 0.607061  |
| C  | -3.324367 | -2.085808 | 2.657564  |
| C  | 1.117928  | 2.435910  | -0.833636 |
| C  | 3.287779  | 1.756222  | 0.275449  |
| C  | -0.364993 | 2.738630  | -0.748448 |
| C  | 4.091589  | 2.654717  | 0.976585  |
| C  | 5.475341  | 2.634631  | 0.822844  |
| C  | 6.067931  | 1.709185  | -0.030151 |
| C  | 5.271350  | 0.805517  | -0.729600 |
| C  | 3.888964  | 0.829743  | -0.578736 |
| C  | -0.910912 | 3.434710  | 0.333656  |
| C  | -2.263271 | 3.752972  | 0.378260  |
| C  | -3.080186 | 3.374646  | -0.678607 |
| C  | -2.571036 | 2.689217  | -1.770635 |
| C  | -1.214913 | 2.376666  | -1.795488 |
| Cl | -4.802938 | 3.774692  | -0.629074 |
| H  | 1.083416  | 0.560653  | 2.900266  |
| H  | 2.581905  | -0.152022 | 2.271304  |
| H  | 1.528801  | -2.283778 | 2.063602  |
| H  | 0.083783  | -1.608116 | 2.834011  |
| H  | 0.079078  | -0.063919 | -0.883795 |

|   |           |           |           |
|---|-----------|-----------|-----------|
| H | 1.557277  | 2.481456  | 1.271690  |
| H | -0.432686 | -5.252048 | -1.731811 |
| H | -2.830541 | -5.338266 | -1.199397 |
| H | -3.851778 | -3.616578 | 0.227578  |
| H | 1.895877  | -2.612162 | -0.433293 |
| H | -1.939496 | -0.757147 | 1.727618  |
| H | 3.206395  | -4.656101 | -0.670676 |
| H | 1.990618  | -4.885191 | 0.592258  |
| H | 1.760025  | -5.609440 | -1.001974 |
| H | 2.721497  | -3.162854 | -2.676878 |
| H | 1.185612  | -2.295519 | -2.801090 |
| H | 1.237302  | -4.042814 | -3.049882 |
| H | -4.178234 | 0.120902  | 1.241709  |
| H | -3.299233 | -0.171638 | -0.263112 |
| H | -4.560746 | -1.293725 | 0.257576  |
| H | -3.736436 | -1.302220 | 3.296848  |
| H | -2.584055 | -2.641728 | 3.236168  |
| H | -4.136544 | -2.770545 | 2.405073  |
| H | 1.660777  | 3.365907  | -1.020316 |
| H | 1.322292  | 1.803113  | -1.699768 |
| H | 3.635784  | 3.373874  | 1.647562  |
| H | 6.087673  | 3.337572  | 1.373874  |
| H | 7.144213  | 1.688768  | -0.147950 |
| H | 5.726505  | 0.081214  | -1.393644 |
| H | 3.283445  | 0.118882  | -1.128240 |
| H | -0.282248 | 3.749024  | 1.157436  |
| H | -2.671733 | 4.293233  | 1.221334  |
| H | -3.215834 | 2.401961  | -2.589863 |
| H | -0.818996 | 1.847700  | -2.654623 |

B3LYP energy = -1695.55587900 a.u.

(R)-17a, Conf. F

|   |           |           |           |
|---|-----------|-----------|-----------|
| C | -0.642569 | 0.169486  | 1.715975  |
| C | 0.371259  | -0.996674 | 1.710180  |
| N | 1.212437  | -0.691486 | 0.522704  |
| C | 0.730032  | 0.359750  | -0.108448 |
| N | -0.325344 | 0.892365  | 0.458334  |
| C | 2.351277  | -1.479467 | 0.117415  |
| C | -1.066140 | 2.101520  | 0.010812  |
| C | 3.614929  | -1.154832 | 0.642384  |
| C | 4.698380  | -1.938394 | 0.241615  |
| C | 4.530306  | -2.999725 | -0.636166 |
| C | 3.270944  | -3.302695 | -1.133246 |
| C | 2.150782  | -2.554825 | -0.766459 |
| C | 3.840056  | 0.010214  | 1.596904  |
| C | 0.785955  | -2.914115 | -1.338001 |
| C | 4.473625  | -0.447798 | 2.921094  |
| C | 4.680945  | 1.116683  | 0.936438  |
| C | 0.732122  | -2.668911 | -2.856142 |
| C | 0.386073  | -4.360131 | -1.000271 |

|    |           |           |           |
|----|-----------|-----------|-----------|
| C  | -2.146771 | 1.749790  | -1.035302 |
| C  | -0.107304 | 3.203068  | -0.420188 |
| C  | -3.226766 | 0.822885  | -0.526447 |
| C  | 0.439923  | 4.033992  | 0.562480  |
| C  | 1.331848  | 5.044450  | 0.223499  |
| C  | 1.688786  | 5.241359  | -1.108373 |
| C  | 1.146396  | 4.423756  | -2.093651 |
| C  | 0.251895  | 3.411433  | -1.752903 |
| C  | -4.221642 | 1.293143  | 0.336258  |
| C  | -5.217327 | 0.450529  | 0.816407  |
| C  | -5.217199 | -0.881520 | 0.423757  |
| C  | -4.250702 | -1.379297 | -0.436912 |
| C  | -3.261627 | -0.519424 | -0.907178 |
| Cl | -6.482960 | -1.962274 | 1.026871  |
| H  | -1.673918 | -0.173230 | 1.701150  |
| H  | -0.501378 | 0.845008  | 2.559273  |
| H  | 0.988807  | -1.025248 | 2.605059  |
| H  | -0.106237 | -1.966504 | 1.578102  |
| H  | 1.180402  | 0.748095  | -1.010274 |
| H  | -1.569919 | 2.447418  | 0.913415  |
| H  | 5.687608  | -1.713545 | 0.619397  |
| H  | 5.385466  | -3.593678 | -0.934855 |
| H  | 3.156493  | -4.133108 | -1.818172 |
| H  | 2.871015  | 0.447199  | 1.838617  |
| H  | 0.041310  | -2.261634 | -0.881790 |
| H  | 4.550732  | 0.396536  | 3.609317  |
| H  | 3.875244  | -1.224029 | 3.401928  |
| H  | 5.479456  | -0.844141 | 2.768282  |
| H  | 4.790189  | 1.962817  | 1.618200  |
| H  | 4.213455  | 1.477817  | 0.018307  |
| H  | 5.681113  | 0.756521  | 0.685941  |
| H  | -0.268740 | -2.885222 | -3.235936 |
| H  | 0.972851  | -1.632966 | -3.102483 |
| H  | 1.437640  | -3.312884 | -3.385630 |
| H  | -0.627761 | -4.558451 | -1.354097 |
| H  | 0.411543  | -4.540087 | 0.076091  |
| H  | 1.051103  | -5.082087 | -1.478457 |
| H  | -2.595542 | 2.693523  | -1.352189 |
| H  | -1.675524 | 1.308295  | -1.914305 |
| H  | 0.160796  | 3.891487  | 1.600249  |
| H  | 1.742017  | 5.681713  | 0.997039  |
| H  | 2.380859  | 6.030206  | -1.375562 |
| H  | 1.413741  | 4.573258  | -3.132321 |
| H  | -0.163118 | 2.795340  | -2.539816 |
| H  | -4.230721 | 2.334592  | 0.636510  |
| H  | -5.983905 | 0.826913  | 1.479938  |
| H  | -4.267636 | -2.416798 | -0.741581 |
| H  | -2.511682 | -0.906130 | -1.586618 |

B3LYP energy = -1695.55529208 a.u.

**Table S10.** Cartesian coordinates and energies of the low-energy conformers of (5*S*,1'*S*)-**1a**, (5*S*,1'*R*)-**1b**, (5*S*,1'*S*)-**2a**, (5*S*,1'*R*)-**2b**, (5*S*,1'*R*)-**3a**, (5*S*,1'*R*)-**3b**, (5*S*,1'*S*)-**4a**, (5*S*,1'*R*)-**4b**, (5*R*,1'*R*)-**5a**, (5*R*,1'*S*)-**5b**, (5*S*,1'*S*)-**8a**, (5*S*,1'*R*)-**8b**, (5*S*,1'*S*)-**9a**, (5*S*,1'*R*)-**9b**, (5*S*,1'*S*)-**10a**, (5*S*,1'*R*)-**10b** and (*R*)-**17a**, calculated at the  $\omega$ B97X/TZVP PCM (solvent: acetonitrile) level. Charge: +1.

|                                                 |           |           |           |                                                 |           |           |           |
|-------------------------------------------------|-----------|-----------|-----------|-------------------------------------------------|-----------|-----------|-----------|
| (5 <i>S</i> ,1' <i>S</i> )- <b>1a</b> , Conf. A |           |           |           | H                                               | 0.341123  | 1.821254  | 0.724189  |
|                                                 |           |           |           | H                                               | -2.093252 | -1.833489 | -1.231080 |
|                                                 |           |           |           | H                                               | -4.178200 | -3.099916 | -1.405723 |
| C                                               | -0.196154 | -0.648123 | 1.363268  | H                                               | -4.192668 | -2.161600 | 0.091730  |
| N                                               | -0.680049 | -0.256752 | 0.002839  | H                                               | -5.138648 | -1.624605 | -1.300242 |
| C                                               | 0.256007  | -0.495466 | -0.894042 | H                                               | -3.004275 | -2.240050 | -3.469327 |
| N                                               | 1.341545  | -1.025368 | -0.410427 | H                                               | -2.154115 | -0.688466 | -3.441694 |
| C                                               | 1.227458  | -1.168432 | 1.045173  | H                                               | -3.918961 | -0.729393 | -3.408066 |
| C                                               | -1.077223 | -1.638834 | 2.157192  | H                                               | 1.010742  | 4.083393  | 0.144502  |
| C                                               | -1.802250 | 0.613013  | -0.270076 | H                                               | 0.239697  | 3.302193  | -1.244819 |
| C                                               | 2.565903  | -1.407849 | -1.125223 | H                                               | -0.644166 | 4.509491  | -0.301777 |
| C                                               | -2.926719 | 0.106978  | -0.935875 | H                                               | 0.285513  | 3.513271  | 2.503762  |
| C                                               | -4.009956 | 0.962521  | -1.112960 | H                                               | -0.988952 | 2.320595  | 2.792403  |
| C                                               | -3.975513 | 2.268614  | -0.657598 | H                                               | -1.395086 | 3.904238  | 2.129274  |
| C                                               | -2.830755 | 2.760709  | -0.056338 | H                                               | 3.279534  | -1.767469 | -3.100073 |
| C                                               | -1.712406 | 1.953870  | 0.129182  | H                                               | 1.543788  | -2.047523 | -2.932465 |
| C                                               | -0.366522 | -1.876869 | 3.496809  | H                                               | 2.190118  | -0.388873 | -3.012980 |
| C                                               | -1.265787 | -2.972782 | 1.434721  | H                                               | 4.960486  | -2.159757 | -0.090948 |
| C                                               | -2.442571 | -1.011383 | 2.455119  | H                                               | 6.855683  | -0.725237 | 0.574583  |
| C                                               | -0.444206 | 2.578081  | 0.691699  | H                                               | 6.680895  | 1.735886  | 0.367869  |
| C                                               | -2.996218 | -1.294392 | -1.519088 | H                                               | 4.600916  | 2.751259  | -0.514792 |
| C                                               | -4.196311 | -2.086913 | -0.997817 | H                                               | 2.716565  | 1.325184  | -1.187584 |
| C                                               | -3.017024 | -1.231824 | -3.049810 | $\omega$ B97X energy = -1161.81409603 a.u.      |           |           |           |
| C                                               | 0.067982  | 3.683770  | -0.235840 | (5 <i>S</i> ,1' <i>S</i> )- <b>1a</b> , Conf. B |           |           |           |
| C                                               | -0.649154 | 3.106136  | 2.112669  | C                                               | 0.210204  | -1.064665 | 1.018167  |
| C                                               | 3.715550  | -0.517648 | -0.687108 | N                                               | 0.710413  | -0.281841 | -0.156071 |
| C                                               | 2.367614  | -1.397124 | -2.633290 | C                                               | -0.176160 | -0.318912 | -1.128612 |
| C                                               | 4.882698  | -1.081703 | -0.188982 | N                                               | -1.227591 | -1.041461 | -0.871411 |
| C                                               | 5.949854  | -0.274216 | 0.186354  | C                                               | -1.082273 | -1.690203 | 0.436690  |
| C                                               | 5.851554  | 1.104202  | 0.071335  | C                                               | 0.000829  | -0.276335 | 2.332549  |
| C                                               | 4.684185  | 1.674503  | -0.422844 | C                                               | 2.033093  | 0.273829  | -0.318559 |
| C                                               | 3.622993  | 0.867140  | -0.801529 | C                                               | -2.450168 | -1.111648 | -1.688586 |
| H                                               | -0.131413 | 0.262998  | 1.960444  | C                                               | 2.189400  | 1.664385  | -0.417133 |
| H                                               | 0.124083  | -0.254474 | -1.941154 | C                                               | 3.484434  | 2.162854  | -0.518316 |
| H                                               | 2.008005  | -0.583052 | 1.532021  | C                                               | 4.580995  | 1.319290  | -0.519508 |
| H                                               | 1.363838  | -2.217063 | 1.309018  | C                                               | 4.397178  | -0.050674 | -0.467580 |
| H                                               | 2.781473  | -2.431251 | -0.807778 | C                                               | 3.122829  | -0.604667 | -0.393619 |
| H                                               | -4.896427 | 0.598263  | -1.619988 | C                                               | 1.328282  | 0.308913  | 2.824815  |
| H                                               | -4.836108 | 2.913261  | -0.794088 | C                                               | -0.477334 | -1.294180 | 3.377778  |
| H                                               | -2.796687 | 3.798248  | 0.257062  | C                                               | -1.038140 | 0.837369  | 2.193210  |
| H                                               | -0.214171 | -0.937172 | 4.034696  | C                                               | 2.977838  | -2.117402 | -0.449055 |
| H                                               | 0.604390  | -2.361972 | 3.374259  | C                                               | 1.027581  | 2.643798  | -0.463018 |
| H                                               | -0.980184 | -2.526348 | 4.123883  | C                                               | 1.138227  | 3.725240  | 0.613618  |
| H                                               | -0.319315 | -3.486302 | 1.250506  | C                                               | 0.912154  | 3.276345  | -1.853370 |
| H                                               | -1.878117 | -3.635148 | 2.050153  | C                                               | 3.605641  | -2.679100 | -1.727740 |
| H                                               | -1.776051 | -2.848607 | 0.478988  | C                                               | 3.574422  | -2.790188 | 0.789245  |
| H                                               | -3.035288 | -0.857974 | 1.553655  | C                                               | -3.559410 | -0.350438 | -0.975839 |
| H                                               | -2.334198 | -0.045466 | 2.956516  |                                                 |           |           |           |
| H                                               | -3.009218 | -1.669363 | 3.117562  |                                                 |           |           |           |

|   |           |           |           |
|---|-----------|-----------|-----------|
| C | -2.765232 | -2.557453 | -2.035927 |
| C | -4.577638 | -0.991839 | -0.280482 |
| C | -5.542247 | -0.252430 | 0.394943  |
| C | -5.497921 | 1.133039  | 0.379308  |
| C | -4.486191 | 1.782031  | -0.318644 |
| C | -3.526089 | 1.043044  | -0.990558 |
| H | 0.936980  | -1.848891 | 1.228720  |
| H | -0.035564 | 0.201827  | -2.068165 |
| H | -0.994860 | -2.768108 | 0.301435  |
| H | -1.961864 | -1.483680 | 1.045011  |
| H | -2.210492 | -0.575709 | -2.609397 |
| H | 3.636455  | 3.233375  | -0.596452 |
| H | 5.581452  | 1.731208  | -0.583644 |
| H | 5.259933  | -0.706138 | -0.507739 |
| H | 1.710645  | 1.088560  | 2.166210  |
| H | 2.095582  | -0.465571 | 2.912749  |
| H | 1.185632  | 0.750411  | 3.813518  |
| H | 0.247091  | -2.104277 | 3.498498  |
| H | -0.588686 | -0.797702 | 4.343548  |
| H | -1.443784 | -1.735346 | 3.124796  |
| H | -2.013881 | 0.464376  | 1.869920  |
| H | -0.719744 | 1.606223  | 1.488012  |
| H | -1.182166 | 1.322335  | 3.160918  |
| H | 1.916473  | -2.366054 | -0.496194 |
| H | 0.101721  | 2.098248  | -0.278913 |
| H | 0.250696  | 4.361508  | 0.595325  |
| H | 1.224674  | 3.293094  | 1.612952  |
| H | 2.007768  | 4.364615  | 0.446867  |
| H | 0.041562  | 3.934246  | -1.897864 |
| H | 0.809384  | 2.519888  | -2.635225 |
| H | 1.798175  | 3.872785  | -2.084578 |
| H | 3.426998  | -3.754695 | -1.789227 |
| H | 3.177974  | -2.210286 | -2.616263 |
| H | 4.686004  | -2.519125 | -1.746746 |
| H | 3.416702  | -3.869917 | 0.746699  |
| H | 3.125187  | -2.416878 | 1.713064  |
| H | 4.650558  | -2.610106 | 0.849390  |
| H | -3.657041 | -2.597171 | -2.661321 |
| H | -1.933319 | -2.996678 | -2.586731 |
| H | -2.947087 | -3.164630 | -1.148077 |
| H | -4.633342 | -2.073961 | -0.259367 |
| H | -6.330914 | -0.765445 | 0.933051  |
| H | -6.251225 | 1.707969  | 0.905356  |
| H | -4.448510 | 2.864953  | -0.342961 |
| H | -2.740771 | 1.557859  | -1.537457 |

ωB97X energy = -1161.81378530 a.u.

(5S,1'S)-**1a**, Conf. C

|   |           |           |           |
|---|-----------|-----------|-----------|
| C | 1.033929  | -1.791517 | -0.132441 |
| N | 0.611121  | -0.357329 | -0.161036 |
| C | -0.684298 | -0.273936 | -0.373210 |
| N | -1.285525 | -1.421650 | -0.510948 |
| C | -0.287288 | -2.499114 | -0.526915 |
| C | 1.656910  | -2.302287 | 1.188923  |
| C | 1.467979  | 0.802632  | -0.112805 |

|   |           |           |           |
|---|-----------|-----------|-----------|
| C | -2.713455 | -1.644642 | -0.821445 |
| C | 1.368694  | 1.688857  | 0.970882  |
| C | 2.251827  | 2.763426  | 1.007848  |
| C | 3.195584  | 2.952844  | 0.013999  |
| C | 3.238528  | 2.093584  | -1.069231 |
| C | 2.360629  | 1.018892  | -1.171363 |
| C | 2.028664  | -3.773347 | 0.954644  |
| C | 0.694147  | -2.200386 | 2.372555  |
| C | 2.947075  | -1.539637 | 1.506169  |
| C | 2.375222  | 0.179429  | -2.439263 |
| C | 0.331515  | 1.561702  | 2.076274  |
| C | 0.971566  | 1.513271  | 3.465331  |
| C | -0.692286 | 2.698212  | 1.992753  |
| C | 2.084809  | 1.047884  | -3.666695 |
| C | 3.694975  | -0.576005 | -2.607875 |
| C | -3.497685 | -0.361679 | -0.643567 |
| C | -3.258966 | -2.793131 | 0.019223  |
| C | -4.019777 | 0.289547  | -1.754476 |
| C | -4.738331 | 1.469803  | -1.606939 |
| C | -4.931478 | 2.011508  | -0.345362 |
| C | -4.409631 | 1.367457  | 0.770578  |
| C | -3.701306 | 0.185196  | 0.623030  |
| H | 1.781801  | -1.935613 | -0.912881 |
| H | -1.200391 | 0.674853  | -0.436449 |
| H | -0.248161 | -2.935420 | -1.526361 |
| H | -0.564320 | -3.275882 | 0.181119  |
| H | -2.754957 | -1.930155 | -1.876390 |
| H | 2.201593  | 3.464933  | 1.832981  |
| H | 3.885716  | 3.786511  | 0.072777  |
| H | 3.953810  | 2.274565  | -1.863786 |
| H | 2.720479  | -3.875910 | 0.114250  |
| H | 1.157380  | -4.401739 | 0.757746  |
| H | 2.521518  | -4.169271 | 1.844525  |
| H | -0.234437 | -2.751914 | 2.207703  |
| H | 1.166309  | -2.621970 | 3.262397  |
| H | 0.439238  | -1.164728 | 2.599768  |
| H | 2.765043  | -0.492943 | 1.749747  |
| H | 3.646677  | -1.574465 | 0.666357  |
| H | 3.437406  | -2.000372 | 2.366456  |
| H | 1.567864  | -0.551871 | -2.385399 |
| H | -0.214608 | 0.627690  | 1.940470  |
| H | 0.204839  | 1.339996  | 4.223571  |
| H | 1.711471  | 0.713411  | 3.541852  |
| H | 1.469132  | 2.455251  | 3.705968  |
| H | -1.461947 | 2.568828  | 2.757131  |
| H | -1.185390 | 2.730976  | 1.017745  |
| H | -0.214200 | 3.667204  | 2.155638  |
| H | 2.027079  | 0.423040  | -4.560551 |
| H | 1.136774  | 1.578814  | -3.558580 |
| H | 2.871906  | 1.788132  | -3.827332 |
| H | 3.662641  | -1.199517 | -3.503827 |
| H | 3.907353  | -1.221569 | -1.751947 |
| H | 4.531068  | 0.119553  | -2.713709 |
| H | -4.319199 | -2.916810 | -0.200459 |
| H | -2.758191 | -3.733194 | -0.214036 |
| H | -3.147324 | -2.592051 | 1.086175  |

|   |           |           |           |
|---|-----------|-----------|-----------|
| H | -3.864647 | -0.128303 | -2.743764 |
| H | -5.143585 | 1.965870  | -2.481118 |
| H | -5.486306 | 2.935199  | -0.228739 |
| H | -4.556882 | 1.787224  | 1.758937  |
| H | -3.297034 | -0.306886 | 1.502197  |

ωB97X energy = -1161.81300165 a.u.

(5*S*,1'*R*)-**1b**, Conf. A

|   |           |           |           |
|---|-----------|-----------|-----------|
| C | 0.219262  | -1.074245 | 1.049163  |
| N | 0.705723  | -0.271397 | -0.116326 |
| C | -0.199594 | -0.270354 | -1.073237 |
| N | -1.272223 | -0.955011 | -0.798626 |
| C | -1.128075 | -1.610917 | 0.505509  |
| C | 0.112061  | -0.336463 | 2.404126  |
| C | 2.047326  | 0.228855  | -0.308772 |
| C | -2.498837 | -1.087962 | -1.594996 |
| C | 2.267488  | 1.613431  | -0.355196 |
| C | 3.580583  | 2.054682  | -0.485167 |
| C | 4.633843  | 1.161267  | -0.564353 |
| C | 4.385625  | -0.199350 | -0.562657 |
| C | 3.089585  | -0.695839 | -0.461521 |
| C | -0.369264 | -1.376244 | 3.426028  |
| C | -0.871793 | 0.833667  | 2.366013  |
| C | 1.489113  | 0.160825  | 2.855572  |
| C | 2.872160  | -2.196935 | -0.572515 |
| C | 1.152062  | 2.645146  | -0.318752 |
| C | 1.353196  | 3.682099  | 0.787886  |
| C | 1.010561  | 3.330482  | -1.681424 |
| C | 3.413669  | -2.727952 | -1.902790 |
| C | 3.495683  | -2.948402 | 0.605905  |
| C | -3.665219 | -0.455623 | -0.856056 |
| C | -2.325812 | -0.517174 | -2.994313 |
| C | -3.612563 | 0.877447  | -0.456953 |
| C | -4.689137 | 1.457947  | 0.195193  |
| C | -5.832953 | 0.710991  | 0.451553  |
| C | -5.891767 | -0.616786 | 0.055411  |
| C | -4.808952 | -1.198553 | -0.592957 |
| H | 0.915329  | -1.900952 | 1.192738  |
| H | -0.047464 | 0.248484  | -2.010826 |
| H | -1.123335 | -2.692064 | 0.363191  |
| H | -1.974006 | -1.346626 | 1.138616  |
| H | -2.681638 | -2.162948 | -1.672657 |
| H | 3.781038  | 3.119365  | -0.524325 |
| H | 5.650257  | 1.527816  | -0.650089 |
| H | 5.213247  | -0.892364 | -0.663695 |
| H | 0.324460  | -2.219270 | 3.486456  |
| H | -1.361948 | -1.767030 | 3.191863  |
| H | -0.424553 | -0.915889 | 4.414242  |
| H | -0.566102 | 1.601025  | 1.653402  |
| H | -1.887911 | 0.521387  | 2.111860  |
| H | -0.916198 | 1.302431  | 3.351298  |
| H | 1.417571  | 0.550341  | 3.873360  |
| H | 1.872090  | 0.960336  | 2.221534  |
| H | 2.224362  | -0.648817 | 2.859196  |

|   |           |           |           |
|---|-----------|-----------|-----------|
| H | 1.799809  | -2.397737 | -0.577010 |
| H | 0.211677  | 2.132847  | -0.115473 |
| H | 2.246725  | 4.284694  | 0.610815  |
| H | 0.497887  | 4.360318  | 0.822055  |
| H | 1.452936  | 3.212541  | 1.769001  |
| H | 0.174333  | 4.032725  | -1.666175 |
| H | 0.835002  | 2.607548  | -2.481819 |
| H | 1.915758  | 3.889243  | -1.931782 |
| H | 4.497277  | -2.607955 | -1.970019 |
| H | 3.189834  | -3.792529 | -1.998675 |
| H | 2.962238  | -2.206206 | -2.749158 |
| H | 3.293276  | -4.018187 | 0.522552  |
| H | 3.102813  | -2.601234 | 1.565023  |
| H | 4.579785  | -2.812376 | 0.624037  |
| H | -1.500856 | -0.996954 | -3.523509 |
| H | -3.241829 | -0.700936 | -3.554366 |
| H | -2.163558 | 0.562747  | -2.972002 |
| H | -2.724311 | 1.471416  | -0.652352 |
| H | -4.636481 | 2.495745  | 0.503324  |
| H | -6.675398 | 1.164907  | 0.960390  |
| H | -6.779698 | -1.205446 | 0.254907  |
| H | -4.856429 | -2.239773 | -0.895450 |

ωB97X energy = -1161.81484095 a.u.

(5*S*,1'*R*)-**1b**, Conf. B

|   |           |           |           |
|---|-----------|-----------|-----------|
| C | -0.109278 | -0.412672 | 1.329156  |
| N | -0.673407 | -0.172056 | -0.036515 |
| C | 0.243944  | -0.417201 | -0.949145 |
| N | 1.386863  | -0.816065 | -0.471897 |
| C | 1.342837  | -0.839589 | 0.994282  |
| C | -0.875362 | -1.406344 | 2.231886  |
| C | -1.893529 | 0.541562  | -0.336674 |
| C | 2.568589  | -1.198282 | -1.259360 |
| C | -2.956904 | -0.137671 | -0.947103 |
| C | -4.136933 | 0.568504  | -1.159259 |
| C | -4.255795 | 1.895419  | -0.785752 |
| C | -3.172822 | 2.558170  | -0.235872 |
| C | -1.962372 | 1.906137  | -0.022976 |
| C | -0.979257 | -2.803428 | 1.620151  |
| C | -2.276681 | -0.870628 | 2.542684  |
| C | -0.098150 | -1.483425 | 3.553649  |
| C | -0.773220 | 2.710141  | 0.479078  |
| C | -2.866580 | -1.575643 | -1.429317 |
| C | -3.966229 | -2.458165 | -0.835701 |
| C | -2.896481 | -1.629891 | -2.959819 |
| C | -0.442556 | 3.851880  | -0.486405 |
| C | -1.003716 | 3.246313  | 1.893538  |
| C | 3.741916  | -0.318798 | -0.848489 |
| C | 2.801506  | -2.698438 | -1.159497 |
| C | 4.910553  | -0.840072 | -0.308841 |
| C | 5.955356  | 0.002792  | 0.056165  |
| C | 5.839367  | 1.372766  | -0.113560 |
| C | 4.672805  | 1.902494  | -0.653772 |
| C | 3.634896  | 1.061523  | -1.018714 |
| H | -0.099223 | 0.545005  | 1.851327  |

|   |           |           |           |
|---|-----------|-----------|-----------|
| H | 0.063678  | -0.281171 | -2.009027 |
| H | 2.086003  | -0.147978 | 1.391508  |
| H | 1.574830  | -1.842056 | 1.350828  |
| H | 2.312860  | -0.957954 | -2.293899 |
| H | -4.978445 | 0.069616  | -1.626635 |
| H | -5.189648 | 2.421724  | -0.946053 |
| H | -3.262227 | 3.610008  | 0.011863  |
| H | -1.556638 | -2.801664 | 0.695270  |
| H | -1.487098 | -3.469039 | 2.321266  |
| H | -0.001351 | -3.242885 | 1.409383  |
| H | -2.229836 | 0.131812  | 2.977510  |
| H | -2.912478 | -0.825253 | 1.658361  |
| H | -2.763015 | -1.525594 | 3.268833  |
| H | 0.007377  | -0.495100 | 4.009259  |
| H | 0.899014  | -1.911170 | 3.428167  |
| H | -0.640002 | -2.119837 | 4.255829  |
| H | 0.105614  | 2.063262  | 0.499685  |
| H | -1.908144 | -1.987237 | -1.112074 |
| H | -3.963715 | -2.429028 | 0.256214  |
| H | -4.955207 | -2.144965 | -1.177798 |
| H | -3.820679 | -3.494951 | -1.146804 |
| H | -2.778905 | -2.659972 | -3.303016 |
| H | -2.095307 | -1.030793 | -3.399122 |
| H | -3.845931 | -1.251433 | -3.346586 |
| H | 0.459232  | 4.370848  | -0.154380 |
| H | -0.269105 | 3.476620  | -1.497192 |
| H | -1.252012 | 4.583978  | -0.530126 |
| H | -0.113707 | 3.769051  | 2.249946  |
| H | -1.836672 | 3.953383  | 1.910099  |
| H | -1.234586 | 2.446107  | 2.601247  |
| H | 1.910256  | -3.230867 | -1.492527 |
| H | 3.634067  | -2.988616 | -1.800537 |
| H | 3.031097  | -3.011839 | -0.139673 |
| H | 5.023505  | -1.907976 | -0.167412 |
| H | 6.861064  | -0.419171 | 0.476122  |
| H | 6.653364  | 2.028911  | 0.172172  |
| H | 4.573955  | 2.972647  | -0.794081 |
| H | 2.728405  | 1.485693  | -1.441064 |

ωB97X energy = -1161.81317719 a.u.

(5*S*,1'*R*)-**1b**, Conf. C

|   |           |           |           |
|---|-----------|-----------|-----------|
| C | 1.039181  | 1.686148  | -0.600258 |
| N | 0.618928  | 0.387705  | 0.013587  |
| C | -0.655094 | 0.437411  | 0.340355  |
| N | -1.224978 | 1.584537  | 0.108344  |
| C | -0.221454 | 2.551439  | -0.352081 |
| C | 1.497089  | 1.629229  | -2.077055 |
| C | 1.462168  | -0.735879 | 0.341731  |
| C | -2.650439 | 1.930161  | 0.282495  |
| C | 1.248966  | -1.967863 | -0.295871 |
| C | 2.112716  | -3.013188 | 0.016385  |
| C | 3.146236  | -2.846159 | 0.921004  |
| C | 3.306028  | -1.635034 | 1.569844  |
| C | 2.453921  | -0.564598 | 1.317048  |
| C | 2.730041  | 0.731417  | -2.221186 |

|   |           |           |           |
|---|-----------|-----------|-----------|
| C | 1.909270  | 3.057375  | -2.460935 |
| C | 0.392933  | 1.147650  | -3.019062 |
| C | 2.608350  | 0.705292  | 2.138942  |
| C | 0.111222  | -2.230462 | -1.270980 |
| C | 0.612090  | -2.772332 | -2.611389 |
| C | -0.923084 | -3.179429 | -0.657019 |
| C | 2.482098  | 0.408360  | 3.635700  |
| C | 3.929556  | 1.416923  | 1.838817  |
| C | -3.469589 | 0.659290  | 0.400330  |
| C | -2.814426 | 2.922045  | 1.425102  |
| C | -3.866355 | 0.143086  | 1.628835  |
| C | -4.570607 | -1.053556 | 1.692488  |
| C | -4.882747 | -1.743015 | 0.530319  |
| C | -4.492936 | -1.231245 | -0.701377 |
| C | -3.792172 | -0.037087 | -0.763465 |
| H | 1.874953  | 2.077621  | -0.020894 |
| H | -1.178311 | -0.407429 | 0.769193  |
| H | -0.057041 | 3.303138  | 0.420463  |
| H | -0.580658 | 3.048730  | -1.251765 |
| H | -2.933806 | 2.422459  | -0.652280 |
| H | 1.973874  | -3.976785 | -0.460540 |
| H | 3.816851  | -3.669832 | 1.136840  |
| H | 4.094149  | -1.525439 | 2.306361  |
| H | 2.505573  | -0.319519 | -2.038880 |
| H | 3.523422  | 1.031961  | -1.531060 |
| H | 3.123797  | 0.815256  | -3.236473 |
| H | 1.073259  | 3.759413  | -2.429319 |
| H | 2.695088  | 3.432208  | -1.799597 |
| H | 2.299654  | 3.060812  | -3.480349 |
| H | 0.754562  | 1.181046  | -4.048935 |
| H | -0.501198 | 1.774022  | -2.970642 |
| H | 0.099900  | 0.117687  | -2.811799 |
| H | 1.789528  | 1.382615  | 1.892348  |
| H | -0.400002 | -1.289758 | -1.476676 |
| H | 1.070287  | -3.757026 | -2.497029 |
| H | -0.223129 | -2.873749 | -3.307725 |
| H | 1.351272  | -2.107455 | -3.063867 |
| H | -1.757689 | -3.322926 | -1.347161 |
| H | -1.325542 | -2.791116 | 0.282644  |
| H | -0.481533 | -4.157435 | -0.450614 |
| H | 3.297043  | -0.228221 | 3.987358  |
| H | 2.518934  | 1.340590  | 4.203406  |
| H | 1.538370  | -0.092615 | 3.860574  |
| H | 3.994034  | 2.350966  | 2.400814  |
| H | 4.036152  | 1.650958  | 0.776588  |
| H | 4.779510  | 0.792720  | 2.125709  |
| H | -2.279358 | 3.847910  | 1.211242  |
| H | -3.869577 | 3.166025  | 1.549171  |
| H | -2.434111 | 2.515247  | 2.363091  |
| H | -3.630148 | 0.667794  | 2.547178  |
| H | -4.875099 | -1.446014 | 2.655736  |
| H | -5.431305 | -2.676302 | 0.582509  |
| H | -4.738696 | -1.760785 | -1.614512 |
| H | -3.488426 | 0.361671  | -1.726944 |

ωB97X energy = -1161.81289458 a.u.

(5*S*,1'*R*)-**1b**, Conf. D

|   |           |           |           |
|---|-----------|-----------|-----------|
| C | -0.373706 | 0.787311  | -1.326137 |
| N | -0.689640 | 0.277988  | 0.046596  |
| C | 0.351038  | 0.461560  | 0.832222  |
| N | 1.340392  | 1.107264  | 0.283051  |
| C | 0.986181  | 1.489648  | -1.090071 |
| C | -1.428412 | 1.670392  | -2.028027 |
| C | -1.724712 | -0.680551 | 0.370864  |
| C | 2.602391  | 1.444890  | 0.950969  |
| C | -2.808046 | -0.284595 | 1.166178  |
| C | -3.810524 | -1.221038 | 1.401488  |
| C | -3.736432 | -2.499403 | 0.877907  |
| C | -2.628414 | -2.882316 | 0.142918  |
| C | -1.589530 | -1.991771 | -0.107067 |
| C | -2.708453 | 0.869956  | -2.291256 |
| C | -0.823950 | 2.055962  | -3.386129 |
| C | -1.766278 | 2.939048  | -1.245744 |
| C | -0.350233 | -2.498204 | -0.828730 |
| C | -2.914334 | 1.083957  | 1.816522  |
| C | -4.210591 | 1.804219  | 1.439646  |
| C | -2.788504 | 0.966534  | 3.338725  |
| C | 0.313778  | -3.630911 | -0.041031 |
| C | -0.662047 | -2.937138 | -2.260581 |
| C | 3.697180  | 0.427509  | 0.656407  |
| C | 3.013058  | 2.869989  | 0.593390  |
| C | 3.545211  | -0.610198 | -0.254790 |
| C | 4.578363  | -1.513201 | -0.479824 |
| C | 5.774167  | -1.391899 | 0.208675  |
| C | 5.930999  | -0.363342 | 1.130192  |
| C | 4.901974  | 0.537742  | 1.350339  |
| H | -0.226630 | -0.088366 | -1.963134 |
| H | 0.385352  | 0.086607  | 1.848211  |
| H | 1.752876  | 1.161850  | -1.790750 |
| H | 0.903989  | 2.574567  | -1.149031 |
| H | 2.386565  | 1.407064  | 2.021103  |
| H | -4.663705 | -0.943313 | 2.010040  |
| H | -4.534581 | -3.208716 | 1.063965  |
| H | -2.558682 | -3.898984 | -0.227523 |
| H | -3.234663 | 0.609530  | -1.372485 |
| H | -2.494756 | -0.055707 | -2.832976 |
| H | -3.386879 | 1.465598  | -2.905694 |
| H | 0.069780  | 2.675452  | -3.281203 |
| H | -0.560046 | 1.168534  | -3.967867 |
| H | -1.554029 | 2.629015  | -3.960628 |
| H | -2.494129 | 3.525815  | -1.810103 |
| H | -0.895663 | 3.577897  | -1.083627 |
| H | -2.207767 | 2.714785  | -0.275079 |
| H | 0.382747  | -1.691684 | -0.877898 |
| H | -2.079045 | 1.693880  | 1.470607  |
| H | -5.083840 | 1.280390  | 1.835123  |
| H | -4.212343 | 2.812838  | 1.858704  |
| H | -4.331178 | 1.887004  | 0.357269  |
| H | -2.818386 | 1.957753  | 3.796353  |
| H | -1.852182 | 0.485173  | 3.629715  |
| H | -3.611151 | 0.379452  | 3.754644  |

|   |           |           |           |
|---|-----------|-----------|-----------|
| H | -0.332972 | -4.509527 | 0.013692  |
| H | 1.243857  | -3.929342 | -0.529881 |
| H | 0.548241  | -3.318170 | 0.978798  |
| H | -1.366561 | -3.772133 | -2.267618 |
| H | 0.250712  | -3.263651 | -2.763070 |
| H | -1.102255 | -2.126673 | -2.846769 |
| H | 2.213983  | 3.572920  | 0.833124  |
| H | 3.895279  | 3.149797  | 1.166870  |
| H | 3.262275  | 2.956085  | -0.465712 |
| H | 2.617277  | -0.739823 | -0.799639 |
| H | 4.440472  | -2.314118 | -1.197110 |
| H | 6.578300  | -2.097458 | 0.035475  |
| H | 6.858530  | -0.264172 | 1.682202  |
| H | 5.034901  | 1.328176  | 2.082050  |

ωB97X energy = -1161.81066697 a.u.

(5*S*,1'*S*)-**2a**, Conf. A

|   |           |           |           |
|---|-----------|-----------|-----------|
| C | 0.724461  | -1.169975 | 1.044017  |
| N | 1.172828  | -0.365964 | -0.137565 |
| C | 0.316441  | -0.507913 | -1.126039 |
| N | -0.684159 | -1.298781 | -0.865757 |
| C | -0.515252 | -1.896556 | 0.464320  |
| C | 0.451466  | -0.389617 | 2.351850  |
| C | 2.436615  | 0.316306  | -0.286401 |
| C | -1.849909 | -1.551735 | -1.734226 |
| C | 3.607763  | -0.452354 | -0.328849 |
| C | 4.823164  | 0.222132  | -0.385695 |
| C | 4.872878  | 1.603169  | -0.450813 |
| C | 3.699469  | 2.335730  | -0.482716 |
| C | 2.457060  | 1.714572  | -0.401894 |
| C | 1.733584  | 0.284584  | 2.851014  |
| C | 0.034024  | -1.432091 | 3.399054  |
| C | -0.658026 | 0.652249  | 2.201097  |
| C | 1.206002  | 2.574834  | -0.482837 |
| C | 3.609340  | -1.972505 | -0.367333 |
| C | 4.308349  | -2.485701 | -1.629398 |
| C | 4.247139  | -2.572208 | 0.887638  |
| C | 1.170342  | 3.655238  | 0.599784  |
| C | 1.071067  | 3.202349  | -1.873875 |
| C | -3.110268 | -1.191665 | -0.960308 |
| C | -1.790534 | -2.972841 | -2.274759 |
| C | -3.388232 | 0.180907  | -0.648382 |
| C | -4.494760 | 0.481694  | 0.185856  |
| C | -5.331994 | -0.567142 | 0.647111  |
| C | -5.074986 | -1.857569 | 0.301068  |
| C | -3.950694 | -2.166113 | -0.498047 |
| C | -2.607055 | 1.267299  | -1.127154 |
| C | -2.884913 | 2.555747  | -0.767494 |
| C | -3.967260 | 2.843653  | 0.090515  |
| C | -4.757995 | 1.828557  | 0.543866  |
| H | 1.506589  | -1.896199 | 1.265247  |
| H | 0.446248  | -0.013286 | -2.081077 |
| H | -0.357060 | -2.970528 | 0.364585  |
| H | -1.415019 | -1.730491 | 1.053955  |



|   |           |           |           |   |           |           |           |
|---|-----------|-----------|-----------|---|-----------|-----------|-----------|
| H | -1.741696 | -0.867067 | -2.577409 | C | 2.787428  | -2.783355 | -0.733796 |
| H | 5.746913  | -0.345391 | -0.400906 | C | 2.090726  | -0.838479 | 2.473535  |
| H | 5.829764  | 2.109789  | -0.499591 | C | 0.901950  | 2.513540  | -1.237522 |
| H | 3.748504  | 3.415226  | -0.571215 | C | -0.185817 | 3.553942  | -0.955964 |
| H | 2.071355  | 1.083010  | 2.190413  | C | 1.873603  | 3.017037  | -2.307309 |
| H | 2.548234  | -0.438191 | 2.951235  | C | 3.462066  | -1.390660 | 2.867729  |
| H | 1.554200  | 0.721899  | 3.835522  | C | 1.162238  | -0.786511 | 3.691157  |
| H | 0.805231  | -2.197085 | 3.524458  | C | -2.898314 | -1.468001 | -0.019334 |
| H | -0.109540 | -0.940458 | 4.363044  | C | -1.728912 | -3.605478 | -0.842199 |
| H | -0.903641 | -1.930938 | 3.144739  | C | -3.399935 | -0.147049 | -0.267855 |
| H | -1.606673 | 0.213594  | 1.879809  | C | -4.279921 | 0.437834  | 0.677018  |
| H | -0.390324 | 1.434397  | 1.489908  | C | -4.649929 | -0.291642 | 1.837124  |
| H | -0.834857 | 1.134201  | 3.164851  | C | -4.164166 | -1.544630 | 2.049816  |
| H | 0.332656  | 1.939331  | -0.329987 | C | -3.281777 | -2.130298 | 1.113864  |
| H | 2.577354  | -2.321786 | -0.426013 | C | -3.051194 | 0.614794  | -1.415617 |
| H | 4.221534  | -3.572789 | -1.687050 | C | -3.549124 | 1.873133  | -1.606185 |
| H | 3.861596  | -2.058979 | -2.529677 | C | -4.424965 | 2.449610  | -0.662023 |
| H | 5.371807  | -2.236230 | -1.626844 | C | -4.781305 | 1.744614  | 0.450627  |
| H | 4.194752  | -3.662475 | 0.854844  | H | 1.716416  | 0.180140  | -2.185751 |
| H | 3.748484  | -2.235164 | 1.799842  | H | -0.714996 | -0.450109 | 0.880408  |
| H | 5.299792  | -2.288689 | 0.962667  | H | -0.121023 | -1.036704 | -2.978863 |
| H | 0.218159  | 4.189632  | 0.558885  | H | 0.553379  | -2.526981 | -2.306021 |
| H | 1.276757  | 3.229834  | 1.600005  | H | -2.330062 | -1.934137 | -2.019686 |
| H | 1.968638  | 4.387426  | 0.458618  | H | 2.286502  | 4.136461  | 0.390323  |
| H | 0.139644  | 3.769356  | -1.944079 | H | 3.352391  | 3.635559  | 2.548795  |
| H | 1.068332  | 2.445359  | -2.661828 | H | 3.224263  | 1.369407  | 3.493475  |
| H | 1.896760  | 3.888958  | -2.075559 | H | 4.969183  | -1.170517 | -1.207537 |
| H | -2.644080 | -3.159538 | -2.926419 | H | 3.930323  | -0.371172 | -0.029500 |
| H | -0.877041 | -3.102236 | -2.855192 | H | 4.092330  | 0.294428  | -1.657971 |
| H | -1.796545 | -3.717668 | -1.478049 | H | 3.197024  | -0.986718 | -3.669587 |
| H | -6.179305 | -0.318917 | 1.277375  | H | 4.111435  | -2.388958 | -3.106988 |
| H | -5.717343 | -2.659216 | 0.645472  | H | 2.393765  | -2.550196 | -3.452927 |
| H | -3.758784 | -3.206454 | -0.728783 | H | 1.991521  | -3.455164 | -1.065323 |
| H | -1.790374 | 1.091439  | -1.815694 | H | 2.628128  | -2.564486 | 0.322566  |
| H | -2.275023 | 3.366071  | -1.151778 | H | 3.727751  | -3.332408 | -0.815748 |
| H | -4.174192 | 3.869509  | 0.371355  | H | 1.649218  | -1.534434 | 1.759764  |
| H | -5.606224 | 2.035744  | 1.187746  | H | 0.387832  | 1.635485  | -1.632014 |

ωB97X energy = -1315.45723534 a.u.

(5S,1'S)-2a, Conf. B

|   |           |           |           |   |           |           |           |
|---|-----------|-----------|-----------|---|-----------|-----------|-----------|
| C | 1.550872  | -0.702889 | -1.567302 | H | 2.650988  | 2.281364  | -2.529190 |
| N | 1.061773  | -0.234658 | -0.233028 | H | 2.369766  | 3.934377  | -1.981521 |
| C | -0.156072 | -0.686274 | -0.016707 | H | 3.354246  | -2.397077 | 3.278062  |
| N | -0.639814 | -1.415140 | -0.980504 | H | 4.139673  | -1.444580 | 2.012787  |
| C | 0.319626  | -1.486413 | -2.087681 | H | 3.934821  | -0.770045 | 3.632298  |
| C | 2.869352  | -1.509287 | -1.574934 | H | 1.053580  | -1.782378 | 4.126008  |
| C | 1.644702  | 0.824444  | 0.559156  | H | 0.167692  | -0.419751 | 3.426066  |
| C | -1.942923 | -2.107401 | -1.011491 | H | 1.565860  | -0.124637 | 4.461415  |
| C | 1.626586  | 2.127632  | 0.042879  | H | -2.683597 | -4.127425 | -0.905321 |
| C | 2.268066  | 3.122515  | 0.774066  | H | -1.088141 | -3.987215 | -1.637514 |
| C | 2.859532  | 2.845845  | 1.993613  | H | -1.258541 | -3.835784 | 0.114627  |
| C | 2.793857  | 1.567250  | 2.518231  | H | -5.326087 | 0.169182  | 2.549330  |
| C | 2.184965  | 0.529668  | 1.818779  | H | -4.445945 | -2.102608 | 2.934704  |
| C | 4.026246  | -0.633769 | -1.083016 | H | -2.912971 | -3.128572 | 1.312293  |
| C | 3.148951  | -1.878500 | -3.038715 | H | -2.384041 | 0.202455  | -2.163186 |

|   |           |          |           |
|---|-----------|----------|-----------|
| H | -3.270413 | 2.433539 | -2.491276 |
| H | -4.813203 | 3.447882 | -0.826357 |
| H | -5.456495 | 2.173963 | 1.183267  |

ωB97X energy = -1315.45718137 a.u.

(5S,1'S)-2a, Conf. C

|   |           |           |           |
|---|-----------|-----------|-----------|
| C | 1.628463  | -1.619371 | 0.640902  |
| N | 1.159020  | -0.417138 | -0.116538 |
| C | -0.052047 | -0.626948 | -0.581492 |
| N | -0.544062 | -1.801947 | -0.300961 |
| C | 0.500241  | -2.630618 | 0.317858  |
| C | 1.891285  | -1.418771 | 2.153169  |
| C | 1.910470  | 0.783786  | -0.392136 |
| C | -1.830270 | -2.336010 | -0.796840 |
| C | 3.052822  | 0.686460  | -1.198064 |
| C | 3.816807  | 1.835112  | -1.379810 |
| C | 3.433628  | 3.044854  | -0.829305 |
| C | 2.259537  | 3.130614  | -0.102415 |
| C | 1.472263  | 2.008540  | 0.135456  |
| C | 2.974116  | -0.358884 | 2.381127  |
| C | 2.428725  | -2.755698 | 2.682963  |
| C | 0.626917  | -1.036442 | 2.924186  |
| C | 0.171848  | 2.184077  | 0.903476  |
| C | 3.462392  | -0.588725 | -1.918333 |
| C | 3.541100  | -0.361604 | -3.430614 |
| C | 4.786118  | -1.142432 | -1.386125 |
| C | 0.380387  | 2.833317  | 2.272561  |
| C | -0.838290 | 2.983084  | 0.073840  |
| C | -2.796972 | -1.216516 | -1.141191 |
| C | -2.406135 | -3.367509 | 0.169723  |
| C | -3.270705 | -0.260579 | -0.180433 |
| C | -4.206928 | 0.718002  | -0.605578 |
| C | -4.657622 | 0.728698  | -1.951389 |
| C | -4.190577 | -0.184994 | -2.844974 |
| C | -3.251741 | -1.154657 | -2.430694 |
| C | -2.841563 | -0.217749 | 1.175004  |
| C | -3.316450 | 0.724849  | 2.042919  |
| C | -4.254746 | 1.687135  | 1.614547  |
| C | -4.687031 | 1.679041  | 0.320737  |
| H | 2.564945  | -1.953133 | 0.194677  |
| H | -0.593930 | 0.114656  | -1.154668 |
| H | 0.817778  | -3.395035 | -0.393761 |
| H | 0.115197  | -3.121644 | 1.208075  |
| H | -1.600557 | -2.859664 | -1.728885 |
| H | 4.716555  | 1.785214  | -1.982600 |
| H | 4.039520  | 3.929556  | -0.987025 |
| H | 1.946955  | 4.090541  | 0.292932  |
| H | 2.639062  | 0.645048  | 2.121429  |
| H | 3.874859  | -0.576049 | 1.800501  |
| H | 3.253426  | -0.351562 | 3.436915  |
| H | 3.347916  | -3.042317 | 2.165142  |
| H | 2.657742  | -2.658838 | 3.745811  |
| H | 1.708798  | -3.570090 | 2.576962  |
| H | 0.871416  | -0.893777 | 3.978707  |
| H | -0.139796 | -1.813814 | 2.876321  |

|   |           |           |           |
|---|-----------|-----------|-----------|
| H | 0.193802  | -0.101764 | 2.562780  |
| H | -0.270147 | 1.204291  | 1.083860  |
| H | 2.687542  | -1.340764 | -1.762472 |
| H | 3.748779  | -1.306303 | -3.937607 |
| H | 2.602248  | 0.036782  | -3.820494 |
| H | 4.339496  | 0.337435  | -3.689334 |
| H | 5.036307  | -2.077382 | -1.891790 |
| H | 4.744874  | -1.337855 | -0.311716 |
| H | 5.600940  | -0.435962 | -1.562742 |
| H | -0.570951 | 2.877105  | 2.808347  |
| H | 1.087559  | 2.268473  | 2.884260  |
| H | 0.756112  | 3.854566  | 2.178708  |
| H | -1.796909 | 3.035554  | 0.595815  |
| H | -1.010146 | 2.527046  | -0.904846 |
| H | -0.484159 | 4.003074  | -0.094642 |
| H | -3.343100 | -3.735899 | -0.247469 |
| H | -1.734923 | -4.220266 | 0.277824  |
| H | -2.612416 | -2.953751 | 1.156075  |
| H | -5.377263 | 1.482186  | -2.253081 |
| H | -4.529159 | -0.175393 | -3.874025 |
| H | -2.886578 | -1.872077 | -3.157792 |
| H | -2.122695 | -0.939079 | 1.539056  |
| H | -2.968227 | 0.732382  | 3.069722  |
| H | -4.625751 | 2.427394  | 2.313570  |
| H | -5.406097 | 2.414325  | -0.024489 |

ωB97X energy = -1315.45630869 a.u.

(5S,1'S)-2a, Conf. D

|   |           |           |           |
|---|-----------|-----------|-----------|
| C | -0.947488 | -0.130371 | 1.504513  |
| N | -1.391645 | -0.132117 | 0.075652  |
| C | -0.374132 | -0.401850 | -0.714526 |
| N | 0.753684  | -0.595439 | -0.092393 |
| C | 0.568689  | -0.409434 | 1.351568  |
| C | -1.680358 | -1.097910 | 2.463144  |
| C | -2.664443 | 0.332402  | -0.425427 |
| C | 2.045777  | -0.992270 | -0.657700 |
| C | -2.980386 | 1.691295  | -0.289454 |
| C | -4.244358 | 2.104921  | -0.698746 |
| C | -5.139635 | 1.216962  | -1.267611 |
| C | -4.774518 | -0.103468 | -1.459967 |
| C | -3.533393 | -0.577020 | -1.045562 |
| C | -3.164867 | -0.732027 | 2.564129  |
| C | -1.049172 | -0.894018 | 3.847679  |
| C | -1.539614 | -2.562813 | 2.049534  |
| C | -3.173750 | -2.026531 | -1.328385 |
| C | -2.002081 | 2.735427  | 0.226977  |
| C | -1.752756 | 3.814458  | -0.830620 |
| C | -2.478766 | 3.361176  | 1.539480  |
| C | -4.199684 | -3.002452 | -0.748953 |
| C | -3.002379 | -2.253515 | -2.833609 |
| C | 3.073755  | 0.118510  | -0.495414 |
| C | 1.916435  | -1.430915 | -2.110483 |
| C | 4.451575  | -0.206042 | -0.285253 |
| C | 5.391063  | 0.851891  | -0.177373 |
| C | 4.951592  | 2.196143  | -0.284016 |

|   |           |           |           |
|---|-----------|-----------|-----------|
| C | 3.636091  | 2.477736  | -0.494736 |
| C | 2.697271  | 1.428876  | -0.600783 |
| C | 4.935338  | -1.539875 | -0.189227 |
| C | 6.261413  | -1.797630 | 0.010776  |
| C | 7.189934  | -0.740671 | 0.126110  |
| C | 6.761327  | 0.550807  | 0.033533  |
| H | -1.099632 | 0.876472  | 1.895126  |
| H | -0.476880 | -0.445387 | -1.790916 |
| H | 1.185328  | 0.421259  | 1.695003  |
| H | 0.885523  | -1.314502 | 1.869170  |
| H | 2.348949  | -1.853204 | -0.058834 |
| H | -4.524210 | 3.146703  | -0.589505 |
| H | -6.117682 | 1.560921  | -1.583781 |
| H | -5.468569 | -0.783238 | -1.941110 |
| H | -3.633279 | -1.331406 | 3.347695  |
| H | -3.704557 | -0.919686 | 1.635701  |
| H | -3.299123 | 0.321324  | 2.825551  |
| H | -1.137363 | 0.146097  | 4.172825  |
| H | -1.566657 | -1.518672 | 4.578127  |
| H | 0.007274  | -1.170432 | 3.870729  |
| H | -0.497860 | -2.888324 | 2.003110  |
| H | -2.000412 | -2.757393 | 1.080671  |
| H | -2.042748 | -3.196065 | 2.783229  |
| H | -2.214590 | -2.245842 | -0.858565 |
| H | -1.038364 | 2.257635  | 0.409309  |
| H | -0.997093 | 4.518072  | -0.474715 |
| H | -1.398561 | 3.375823  | -1.765848 |
| H | -2.661882 | 4.380824  | -1.044192 |
| H | -1.742659 | 4.079924  | 1.905411  |
| H | -2.635013 | 2.608962  | 2.316730  |
| H | -3.423636 | 3.891239  | 1.397452  |
| H | -3.864813 | -4.030422 | -0.903551 |
| H | -4.342610 | -2.849645 | 0.323154  |
| H | -5.171096 | -2.893669 | -1.236228 |
| H | -2.697372 | -3.284104 | -3.027059 |
| H | -2.247097 | -1.588536 | -3.259741 |
| H | -3.940878 | -2.074116 | -3.363867 |
| H | 2.887105  | -1.787245 | -2.454635 |
| H | 1.197697  | -2.245278 | -2.219342 |
| H | 1.626659  | -0.598087 | -2.754372 |
| H | 5.682909  | 2.992680  | -0.198154 |
| H | 3.298688  | 3.503809  | -0.581177 |
| H | 1.655821  | 1.682812  | -0.770546 |
| H | 4.253886  | -2.376810 | -0.277892 |
| H | 6.605631  | -2.822933 | 0.081682  |
| H | 8.239070  | -0.959892 | 0.286241  |
| H | 7.464955  | 1.372496  | 0.116704  |

ωB97X energy = -1315.45589428 a.u.

(5S,1'S)-2a, Conf. E

|   |           |           |           |
|---|-----------|-----------|-----------|
| C | -0.676470 | -0.728506 | 1.324233  |
| N | -1.187810 | -0.298621 | -0.014684 |
| C | -0.298269 | -0.577280 | -0.945675 |
| N | 0.775800  | -1.167175 | -0.506691 |
| C | 0.685714  | -1.359428 | 0.945085  |

|   |           |           |           |
|---|-----------|-----------|-----------|
| C | -1.592243 | -1.645599 | 2.165935  |
| C | -2.289749 | 0.608054  | -0.247002 |
| C | 1.904427  | -1.703910 | -1.283959 |
| C | -3.442055 | 0.140768  | -0.894226 |
| C | -4.505588 | 1.026955  | -1.037012 |
| C | -4.428530 | 2.323704  | -0.561568 |
| C | -3.260338 | 2.775577  | 0.025717  |
| C | -2.158246 | 1.939139  | 0.173529  |
| C | -2.890532 | -0.916923 | 2.527727  |
| C | -0.834116 | -1.932977 | 3.469753  |
| C | -1.915915 | -2.964238 | 1.463955  |
| C | -0.869777 | 2.523307  | 0.733656  |
| C | -3.570472 | -1.254715 | -1.482127 |
| C | -4.777862 | -2.009109 | -0.921626 |
| C | -3.638228 | -1.189082 | -3.011020 |
| C | -0.381019 | 3.689933  | -0.129010 |
| C | -1.031593 | 2.958958  | 2.191714  |
| C | 3.229980  | -1.270590 | -0.676474 |
| C | 1.776481  | -1.410262 | -2.772600 |
| C | 3.615904  | 0.100873  | -0.515796 |
| C | 4.882813  | 0.383265  | 0.059757  |
| C | 5.739821  | -0.680874 | 0.442616  |
| C | 5.355112  | -1.974694 | 0.270986  |
| C | 4.089305  | -2.260870 | -0.284277 |
| C | 2.800948  | 1.205575  | -0.888116 |
| C | 3.218002  | 2.493013  | -0.700057 |
| C | 4.476080  | 2.764318  | -0.122847 |
| C | 5.286057  | 1.730595  | 0.244752  |
| H | -0.509620 | 0.175484  | 1.912228  |
| H | -0.452638 | -0.315753 | -1.984832 |
| H | 1.525662  | -0.867398 | 1.434843  |
| H | 0.733212  | -2.426891 | 1.163020  |
| H | 1.845421  | -2.788501 | -1.158297 |
| H | -5.411778 | 0.693636  | -1.530166 |
| H | -5.274565 | 2.992544  | -0.669574 |
| H | -3.195409 | 3.805320  | 0.358820  |
| H | -3.520248 | -0.729292 | 1.658027  |
| H | -2.685862 | 0.043249  | 3.009639  |
| H | -3.465538 | -1.525579 | 3.228954  |
| H | -0.591949 | -1.006689 | 3.997906  |
| H | -1.458758 | -2.540660 | 4.127094  |
| H | 0.094549  | -2.482630 | 3.299822  |
| H | -1.021747 | -3.552365 | 1.246068  |
| H | -2.453969 | -2.806003 | 0.529054  |
| H | -2.551997 | -3.572704 | 2.110201  |
| H | -0.085607 | 1.764994  | 0.691841  |
| H | -2.676801 | -1.823824 | -1.223973 |
| H | -4.801606 | -3.024926 | -1.322260 |
| H | -4.744656 | -2.075929 | 0.168039  |
| H | -5.714625 | -1.521005 | -1.199784 |
| H | -4.529840 | -0.650129 | -3.340727 |
| H | -3.680880 | -2.196751 | -3.429920 |
| H | -2.766441 | -0.682177 | -3.431137 |
| H | 0.566449  | 4.068460  | 0.261532  |
| H | -0.225826 | 3.378273  | -1.164697 |
| H | -1.095251 | 4.516131  | -0.127068 |

|   |           |           |           |
|---|-----------|-----------|-----------|
| H | -1.770426 | 3.759293  | 2.278211  |
| H | -0.083377 | 3.333897  | 2.582496  |
| H | -1.360709 | 2.134998  | 2.829843  |
| H | 2.619050  | -1.879400 | -3.279085 |
| H | 0.861517  | -1.840720 | -3.183142 |
| H | 1.805148  | -0.344393 | -2.998928 |
| H | 6.704957  | -0.441848 | 0.876329  |
| H | 6.006664  | -2.789192 | 0.563977  |
| H | 3.793198  | -3.298305 | -0.399985 |
| H | 1.832997  | 1.042279  | -1.340461 |
| H | 2.576522  | 3.313513  | -1.000977 |
| H | 4.793378  | 3.790202  | 0.022446  |
| H | 6.257620  | 1.921496  | 0.688106  |

ωB97X energy = -1315.45541486 a.u.

(5*S*,1'*R*)-**2b**, Conf. A

|   |           |           |           |
|---|-----------|-----------|-----------|
| C | -1.584488 | -1.189994 | -1.258393 |
| N | -1.105932 | -0.393077 | -0.086083 |
| C | 0.068538  | -0.831825 | 0.309958  |
| N | 0.533910  | -1.829764 | -0.386033 |
| C | -0.456638 | -2.247746 | -1.384867 |
| C | -1.877330 | -0.411584 | -2.563596 |
| C | -1.838475 | 0.624708  | 0.627501  |
| C | 1.849491  | -2.483405 | -0.235840 |
| C | -2.986866 | 0.251548  | 1.337901  |
| C | -3.727583 | 1.260590  | 1.945761  |
| C | -3.315615 | 2.580366  | 1.896163  |
| C | -2.135344 | 2.911727  | 1.254214  |
| C | -1.369760 | 1.947196  | 0.606931  |
| C | -2.403670 | -1.444869 | -3.569977 |
| C | -0.636260 | 0.270982  | -3.140852 |
| C | -2.978841 | 0.630341  | -2.341784 |
| C | -0.059568 | 2.367591  | -0.039902 |
| C | -3.423804 | -1.193380 | 1.522090  |
| C | -3.476432 | -1.557969 | 3.008646  |
| C | -4.767873 | -1.475343 | 0.847683  |
| C | -0.247157 | 3.488512  | -1.063685 |
| C | 0.963218  | 2.774172  | 1.025592  |
| C | 2.794020  | -1.577919 | 0.536456  |
| C | 1.665104  | -3.881522 | 0.337884  |
| C | 3.273416  | -0.367953 | -0.068973 |
| C | 4.133575  | 0.476219  | 0.677178  |
| C | 4.509193  | 0.106633  | 1.995217  |
| C | 4.047359  | -1.048367 | 2.546518  |
| C | 3.183972  | -1.890363 | 1.809108  |
| C | 2.915827  | 0.039034  | -1.382476 |
| C | 3.382706  | 1.208986  | -1.913068 |
| C | 4.240312  | 2.043520  | -1.165331 |
| C | 4.608670  | 1.679678  | 0.097337  |
| H | -2.514237 | -1.678725 | -0.964920 |
| H | 0.601016  | -0.397289 | 1.146670  |
| H | -0.811363 | -3.252683 | -1.157328 |
| H | 0.005946  | -2.258919 | -2.371552 |
| H | 2.232511  | -2.586473 | -1.255590 |

|   |           |           |           |
|---|-----------|-----------|-----------|
| H | -4.631501 | 1.004318  | 2.486876  |
| H | -3.904261 | 3.351093  | 2.380151  |
| H | -1.800623 | 3.942991  | 1.254528  |
| H | -3.308250 | -1.932604 | -3.197216 |
| H | -1.667352 | -2.218889 | -3.797769 |
| H | -2.653320 | -0.945196 | -4.507861 |
| H | 0.141037  | -0.443197 | -3.422863 |
| H | -0.911239 | 0.815306  | -4.046676 |
| H | -0.203667 | 0.992245  | -2.445911 |
| H | -2.651700 | 1.455940  | -1.709721 |
| H | -3.865208 | 0.183722  | -1.883269 |
| H | -3.278283 | 1.048110  | -3.305274 |
| H | 0.362038  | 1.514740  | -0.572780 |
| H | -2.673358 | -1.846000 | 1.073527  |
| H | -3.708441 | -2.618836 | 3.124533  |
| H | -2.519928 | -1.362365 | 3.497480  |
| H | -4.247863 | -0.989045 | 3.532580  |
| H | -5.040476 | -2.525155 | 0.974173  |
| H | -4.740777 | -1.259041 | -0.223153 |
| H | -5.560844 | -0.866963 | 1.289403  |
| H | 0.702784  | 3.696780  | -1.561939 |
| H | -0.979620 | 3.219351  | -1.828023 |
| H | -0.581913 | 4.412447  | -0.586963 |
| H | 1.922773  | 3.003264  | 0.555625  |
| H | 1.127103  | 1.976467  | 1.755419  |
| H | 0.629100  | 3.660241  | 1.571119  |
| H | 2.631271  | -4.378010 | 0.426056  |
| H | 1.042149  | -4.482241 | -0.325155 |
| H | 1.188556  | -3.851842 | 1.318612  |
| H | 5.168781  | 0.762580  | 2.553247  |
| H | 4.332707  | -1.331711 | 3.552532  |
| H | 2.832468  | -2.800359 | 2.278538  |
| H | 2.268350  | -0.584231 | -1.987679 |
| H | 3.096513  | 1.495387  | -2.918764 |
| H | 4.606040  | 2.966778  | -1.599102 |
| H | 5.269067  | 2.310503  | 0.682883  |

ωB97X energy = -1315.45861347 a.u.

(5*S*,1'*R*)-**2b**, Conf. B

|   |           |           |           |
|---|-----------|-----------|-----------|
| C | -0.659583 | -0.753593 | 1.266644  |
| N | -1.189505 | -0.262989 | -0.044603 |
| C | -0.300220 | -0.478373 | -0.991772 |
| N | 0.783219  | -1.078583 | -0.592500 |
| C | 0.707053  | -1.351259 | 0.847197  |
| C | -1.557170 | -1.721112 | 2.069701  |
| C | -2.280039 | 0.671097  | -0.216431 |
| C | 1.893618  | -1.527219 | -1.454516 |
| C | -3.453933 | 0.249705  | -0.855551 |
| C | -4.502122 | 1.160807  | -0.943876 |
| C | -4.387359 | 2.438527  | -0.425796 |
| C | -3.197598 | 2.847100  | 0.150304  |
| C | -2.110589 | 1.983750  | 0.245694  |
| C | -0.772679 | -2.086340 | 3.337992  |
| C | -1.896285 | -2.994699 | 1.295465  |
| C | -2.846212 | -1.014396 | 2.500165  |

|   |           |           |           |
|---|-----------|-----------|-----------|
| C | -0.794056 | 2.521933  | 0.786187  |
| C | -3.615958 | -1.119268 | -1.494649 |
| C | -4.828839 | -1.874406 | -0.947748 |
| C | -3.701081 | -0.992929 | -3.018806 |
| C | -0.284801 | 3.675841  | -0.082022 |
| C | -0.911361 | 2.952265  | 2.249691  |
| C | 3.211566  | -1.177702 | -0.780693 |
| C | 1.704651  | -2.996074 | -1.810320 |
| C | 3.604724  | 0.195670  | -0.647550 |
| C | 4.811257  | 0.497779  | 0.034033  |
| C | 5.610760  | -0.556130 | 0.548153  |
| C | 5.227500  | -1.852056 | 0.392143  |
| C | 4.018679  | -2.157679 | -0.273233 |
| C | 2.847046  | 1.280894  | -1.165431 |
| C | 3.258645  | 2.574173  | -1.004806 |
| C | 4.453067  | 2.867305  | -0.314040 |
| C | 5.210854  | 1.849622  | 0.187438  |
| H | -0.498754 | 0.122839  | 1.897226  |
| H | -0.458192 | -0.164106 | -2.017099 |
| H | 1.545619  | -0.877979 | 1.356882  |
| H | 0.760687  | -2.426677 | 1.015801  |
| H | 1.805864  | -0.943748 | -2.373727 |
| H | -5.424868 | 0.863880  | -1.429534 |
| H | -5.221092 | 3.127892  | -0.492834 |
| H | -3.103704 | 3.863972  | 0.514714  |
| H | -0.500380 | -1.192158 | 3.905301  |
| H | 0.141226  | -2.642647 | 3.117501  |
| H | -1.392163 | -2.715183 | 3.980094  |
| H | -1.005900 | -3.546659 | 0.984994  |
| H | -2.483661 | -3.660045 | 1.931630  |
| H | -2.490249 | -2.783467 | 0.406176  |
| H | -3.482744 | -0.755571 | 1.653800  |
| H | -2.628087 | -0.095245 | 3.051278  |
| H | -3.419436 | -1.670026 | 3.159302  |
| H | -0.035700 | 1.739327  | 0.726067  |
| H | -2.728174 | -1.711469 | -1.270957 |
| H | -4.874808 | -2.873726 | -1.386134 |
| H | -4.783128 | -1.983260 | 0.138068  |
| H | -5.760860 | -1.361073 | -1.194865 |
| H | -3.771431 | -1.982621 | -3.475232 |
| H | -2.822674 | -0.490213 | -3.430071 |
| H | -4.584205 | -0.422016 | -3.316143 |
| H | 0.687448  | 4.015083  | 0.283027  |
| H | -0.168736 | 3.365230  | -1.123097 |
| H | -0.968643 | 4.527283  | -0.056126 |
| H | 0.056333  | 3.295434  | 2.621472  |
| H | -1.250459 | 2.133252  | 2.888987  |
| H | -1.622884 | 3.774218  | 2.358988  |
| H | 2.517839  | -3.334412 | -2.452504 |
| H | 0.765730  | -3.121084 | -2.350551 |
| H | 1.675306  | -3.633014 | -0.924840 |
| H | 6.532507  | -0.308238 | 1.063705  |
| H | 5.838745  | -2.658613 | 0.779097  |
| H | 3.739891  | -3.199276 | -0.371449 |
| H | 1.932791  | 1.097956  | -1.715064 |
| H | 2.664299  | 3.382059  | -1.416247 |

|   |          |          |           |
|---|----------|----------|-----------|
| H | 4.766289 | 3.897444 | -0.191605 |
| H | 6.137148 | 2.058268 | 0.712294  |

ωB97X energy = -1315.45665002 a.u.

(5*S*,1'*R*)-**2b**, Conf. C

|   |           |           |           |
|---|-----------|-----------|-----------|
| C | 0.929871  | -0.520975 | 1.379468  |
| N | 1.412388  | -0.206896 | -0.002064 |
| C | 0.427227  | -0.340282 | -0.866228 |
| N | -0.712073 | -0.679799 | -0.334058 |
| C | -0.549592 | -0.890584 | 1.109041  |
| C | 1.130560  | 0.569812  | 2.456691  |
| C | 2.794172  | -0.081956 | -0.407614 |
| C | -1.994590 | -0.922021 | -1.001489 |
| C | 3.615483  | -1.216048 | -0.334821 |
| C | 4.963836  | -1.059489 | -0.640139 |
| C | 5.468193  | 0.161619  | -1.050553 |
| C | 4.621464  | 1.247132  | -1.186810 |
| C | 3.269442  | 1.152852  | -0.871734 |
| C | 0.409376  | 1.875749  | 2.122054  |
| C | 2.622980  | 0.841643  | 2.671391  |
| C | 0.566120  | -0.004689 | 3.763957  |
| C | 2.383520  | 2.367946  | -1.089584 |
| C | 3.099175  | -2.604738 | 0.008069  |
| C | 3.369393  | -3.584588 | -1.137127 |
| C | 3.692902  | -3.125836 | 1.318821  |
| C | 2.882290  | 3.596260  | -0.325870 |
| C | 2.255253  | 2.677692  | -2.584097 |
| C | -3.044283 | 0.073140  | -0.527467 |
| C | -1.854840 | -0.916429 | -2.517335 |
| C | -4.406306 | -0.335170 | -0.367758 |
| C | -5.359597 | 0.628451  | 0.052461  |
| C | -4.950664 | 1.964206  | 0.295995  |
| C | -3.650749 | 2.330940  | 0.121192  |
| C | -2.698750 | 1.375598  | -0.294571 |
| C | -4.862056 | -1.658642 | -0.618966 |
| C | -6.174469 | -1.997298 | -0.451578 |
| C | -7.115996 | -1.036826 | -0.022947 |
| C | -6.714650 | 0.243495  | 0.221368  |
| H | 1.472821  | -1.403148 | 1.720794  |
| H | 0.567742  | -0.190922 | -1.928930 |
| H | -0.772301 | -1.931511 | 1.346103  |
| H | -1.249419 | -0.253844 | 1.648578  |
| H | -2.278482 | -1.925736 | -0.680192 |
| H | 5.626968  | -1.914895 | -0.576017 |
| H | 6.521386  | 0.262606  | -1.285684 |
| H | 5.018410  | 2.189881  | -1.546056 |
| H | 0.559453  | 2.591704  | 2.932824  |
| H | -0.669084 | 1.741449  | 2.007067  |
| H | 0.795409  | 2.332153  | 1.209698  |
| H | 3.089654  | 1.316236  | 1.808344  |
| H | 2.750874  | 1.508494  | 3.526761  |
| H | 3.167733  | -0.082395 | 2.884563  |
| H | 1.065178  | -0.939933 | 4.031866  |
| H | -0.508239 | -0.193447 | 3.708060  |
| H | 0.731134  | 0.707951  | 4.574181  |

|   |           |           |           |
|---|-----------|-----------|-----------|
| H | 1.383753  | 2.138197  | -0.720679 |
| H | 2.015031  | -2.558252 | 0.121302  |
| H | 2.922281  | -4.554841 | -0.910700 |
| H | 2.943584  | -3.222249 | -2.075084 |
| H | 4.440482  | -3.737505 | -1.286911 |
| H | 3.264118  | -4.098843 | 1.567167  |
| H | 3.500575  | -2.446006 | 2.152706  |
| H | 4.775394  | -3.247886 | 1.233648  |
| H | 2.174965  | 4.420031  | -0.444185 |
| H | 3.850087  | 3.933216  | -0.704236 |
| H | 2.990822  | 3.394458  | 0.742033  |
| H | 1.574937  | 3.517996  | -2.738041 |
| H | 1.870244  | 1.820921  | -3.141968 |
| H | 3.224439  | 2.945154  | -3.012118 |
| H | -2.823390 | -1.156201 | -2.955594 |
| H | -1.135456 | -1.663724 | -2.856574 |
| H | -1.562760 | 0.068981  | -2.886803 |
| H | -5.692368 | 2.686524  | 0.619565  |
| H | -3.336571 | 3.352294  | 0.300751  |
| H | -1.670397 | 1.695469  | -0.427282 |
| H | -4.170360 | -2.420938 | -0.954874 |
| H | -6.497203 | -3.012897 | -0.649384 |
| H | -8.153726 | -1.320388 | 0.107984  |
| H | -7.428218 | 0.992913  | 0.547249  |

ωB97X energy = -1315.45633822 a.u.

(5*S*,1'*R*)-**2b**, Conf. D

|   |           |           |           |
|---|-----------|-----------|-----------|
| C | 0.778374  | -1.167492 | 1.103581  |
| N | 1.191223  | -0.376536 | -0.098915 |
| C | 0.324187  | -0.552983 | -1.073457 |
| N | -0.681992 | -1.320096 | -0.768732 |
| C | -0.521622 | -1.838857 | 0.594116  |
| C | 0.615384  | -0.399070 | 2.435924  |
| C | 2.463304  | 0.277607  | -0.300403 |
| C | -1.850031 | -1.670899 | -1.591931 |
| C | 2.507745  | 1.675540  | -0.407178 |
| C | 3.757714  | 2.272199  | -0.540039 |
| C | 4.915609  | 1.514982  | -0.566000 |
| C | 4.839998  | 0.134669  | -0.509241 |
| C | 3.614516  | -0.515151 | -0.402366 |
| C | 0.208204  | -1.443992 | 3.484995  |
| C | -0.451798 | 0.693843  | 2.369150  |
| C | 1.951135  | 0.209656  | 2.875242  |
| C | 3.582206  | -2.034375 | -0.458899 |
| C | 1.270813  | 2.558727  | -0.426368 |
| C | 1.313848  | 3.640173  | 0.655107  |
| C | 1.075057  | 3.187798  | -1.809256 |
| C | 4.199898  | -2.542688 | -1.764753 |
| C | 4.274679  | -2.666058 | 0.750435  |
| C | -3.142240 | -1.280509 | -0.887628 |
| C | -1.729220 | -1.161694 | -3.022143 |
| C | -3.465120 | 0.066193  | -0.513959 |
| C | -4.690590 | 0.305339  | 0.162133  |
| C | -5.577621 | -0.771191 | 0.421945  |
| C | -5.257944 | -2.037782 | 0.041226  |

|   |           |           |           |
|---|-----------|-----------|-----------|
| C | -4.027785 | -2.285315 | -0.605539 |
| C | -2.625916 | 1.186583  | -0.764381 |
| C | -2.971125 | 2.444093  | -0.358098 |
| C | -4.185040 | 2.669790  | 0.323599  |
| C | -5.023480 | 1.622695  | 0.570124  |
| H | 1.543902  | -1.926874 | 1.269699  |
| H | 0.454000  | -0.098510 | -2.047515 |
| H | -0.447539 | -2.926099 | 0.559404  |
| H | -1.394889 | -1.569775 | 1.187093  |
| H | -1.839835 | -2.762930 | -1.636617 |
| H | 3.825617  | 3.350977  | -0.624330 |
| H | 5.879742  | 2.002082  | -0.654684 |
| H | 5.749978  | -0.451619 | -0.571423 |
| H | 0.952586  | -2.241527 | 3.558405  |
| H | -0.760834 | -1.899164 | 3.268108  |
| H | 0.131946  | -0.965402 | 4.463081  |
| H | -1.437698 | 0.305326  | 2.101568  |
| H | -0.547016 | 1.166003  | 3.349259  |
| H | -0.191797 | 1.475470  | 1.654878  |
| H | 2.283830  | 1.009792  | 2.213703  |
| H | 2.739604  | -0.547082 | 2.913937  |
| H | 1.844237  | 0.630534  | 3.877302  |
| H | 2.541940  | -2.363156 | -0.465333 |
| H | 0.396760  | 1.937001  | -0.228175 |
| H | 0.370113  | 4.190530  | 0.668871  |
| H | 1.471416  | 3.213622  | 1.648130  |
| H | 2.114275  | 4.359010  | 0.466538  |
| H | 0.150059  | 3.769116  | -1.831596 |
| H | 1.020294  | 2.430639  | -2.595074 |
| H | 1.900771  | 3.860743  | -2.052983 |
| H | 4.089928  | -3.627142 | -1.831492 |
| H | 3.711759  | -2.095647 | -2.633201 |
| H | 5.266168  | -2.311754 | -1.818990 |
| H | 4.201549  | -3.754508 | 0.701629  |
| H | 3.829270  | -2.337521 | 1.692729  |
| H | 5.334640  | -2.401418 | 0.774759  |
| H | -2.588048 | -1.530879 | -3.581454 |
| H | -0.827941 | -1.550059 | -3.499678 |
| H | -1.733477 | -0.074121 | -3.095370 |
| H | -6.512543 | -0.563938 | 0.931441  |
| H | -5.932461 | -2.862024 | 0.239813  |
| H | -3.779525 | -3.305423 | -0.879714 |
| H | -1.693942 | 1.063097  | -1.296417 |
| H | -2.307502 | 3.276597  | -0.565495 |
| H | -4.447671 | 3.671876  | 0.641461  |
| H | -5.965125 | 1.779597  | 1.085626  |

ωB97X energy = -1315.45576614 a.u.

(5*S*,1'*R*)-**2b**, Conf. E

|   |           |           |           |
|---|-----------|-----------|-----------|
| C | 1.490495  | -0.994422 | -1.410733 |
| N | 1.091019  | -0.332629 | -0.129023 |
| C | -0.131833 | -0.699835 | 0.192176  |
| N | -0.664933 | -1.580771 | -0.608056 |
| C | 0.316147  | -1.979329 | -1.625534 |
| C | 2.887460  | -1.650460 | -1.485049 |

|   |           |           |           |
|---|-----------|-----------|-----------|
| C | 1.715625  | 0.834440  | 0.456076  |
| C | -1.928634 | -2.307533 | -0.354216 |
| C | 1.611248  | 2.060964  | -0.215000 |
| C | 2.288317  | 3.151339  | 0.322377  |
| C | 2.999072  | 3.041832  | 1.504075  |
| C | 3.024533  | 1.838296  | 2.185448  |
| C | 2.383961  | 0.710130  | 1.681950  |
| C | 3.002781  | -2.244414 | -2.896471 |
| C | 3.086419  | -2.761320 | -0.453903 |
| C | 3.987810  | -0.596400 | -1.323853 |
| C | 2.404400  | -0.568506 | 2.501656  |
| C | 0.762221  | 2.272199  | -1.459448 |
| C | -0.311036 | 3.335821  | -1.210754 |
| C | 1.616087  | 2.638514  | -2.675321 |
| C | 3.829984  | -1.019478 | 2.827658  |
| C | 1.586887  | -0.399765 | 3.785948  |
| C | -2.906527 | -1.452126 | 0.430331  |
| C | -2.512253 | -2.868034 | -1.647810 |
| C | -3.406288 | -0.197478 | -0.053760 |
| C | -4.358022 | 0.500690  | 0.734176  |
| C | -4.795700 | -0.050335 | 1.966457  |
| C | -4.303023 | -1.239867 | 2.407389  |
| C | -3.349737 | -1.935513 | 1.631813  |
| C | -2.993323 | 0.401541  | -1.275915 |
| C | -3.502720 | 1.600581  | -1.686382 |
| C | -4.453161 | 2.285440  | -0.900716 |
| C | -4.867306 | 1.744786  | 0.281061  |
| H | 1.463052  | -0.224164 | -2.185701 |
| H | -0.657160 | -0.287268 | 1.045324  |
| H | -0.111746 | -1.896633 | -2.622605 |
| H | 0.605397  | -3.017202 | -1.452125 |
| H | -1.665226 | -3.160907 | 0.276373  |
| H | 2.240071  | 4.109352  | -0.182866 |
| H | 3.515622  | 3.904837  | 1.908037  |
| H | 3.550921  | 1.772479  | 3.130921  |
| H | 2.870427  | -1.475388 | -3.662415 |
| H | 2.269795  | -3.035040 | -3.073723 |
| H | 3.994324  | -2.681612 | -3.027805 |
| H | 2.368811  | -3.576039 | -0.569524 |
| H | 4.082988  | -3.190677 | -0.576632 |
| H | 3.013137  | -2.387791 | 0.566862  |
| H | 4.017424  | -0.172691 | -0.319590 |
| H | 3.859188  | 0.224237  | -2.034815 |
| H | 4.959258  | -1.055586 | -1.519144 |
| H | 1.928993  | -1.358672 | 1.919986  |
| H | 0.229325  | 1.347343  | -1.687735 |
| H | -0.947078 | 3.435716  | -2.093054 |
| H | -0.947087 | 3.066076  | -0.364541 |
| H | 0.134681  | 4.312058  | -1.007690 |
| H | 0.986737  | 2.741593  | -3.561696 |
| H | 2.374922  | 1.880410  | -2.883664 |
| H | 2.130735  | 3.589344  | -2.517142 |
| H | 3.809724  | -1.988795 | 3.330630  |
| H | 4.440570  | -1.117240 | 1.927177  |
| H | 4.327020  | -0.311061 | 3.494183  |
| H | 1.573851  | -1.335919 | 4.348398  |

|   |           |           |           |
|---|-----------|-----------|-----------|
| H | 0.553492  | -0.117434 | 3.571888  |
| H | 2.019490  | 0.372375  | 4.427008  |
| H | -3.416503 | -3.421163 | -1.394910 |
| H | -1.820287 | -3.564419 | -2.122804 |
| H | -2.780284 | -2.092666 | -2.364057 |
| H | -5.526800 | 0.498017  | 2.550790  |
| H | -4.632991 | -1.660137 | 3.349837  |
| H | -2.964187 | -2.880468 | 2.000002  |
| H | -2.261100 | -0.089559 | -1.901985 |
| H | -3.171019 | 2.031943  | -2.623832 |
| H | -4.848930 | 3.235891  | -1.238776 |
| H | -5.595457 | 2.260129  | 0.898616  |

ωB97X energy = -1315.45447723 a.u.

(5S,1'S)-**3a**, Conf. A

|   |           |           |           |
|---|-----------|-----------|-----------|
| C | 0.491202  | -0.925599 | 0.977334  |
| C | -0.916816 | -0.401526 | 1.354733  |
| N | -1.525984 | -0.192173 | 0.004393  |
| C | -0.657506 | -0.504087 | -0.935439 |
| N | 0.487375  | -0.935054 | -0.489757 |
| C | -1.690165 | -1.304415 | 2.343238  |
| C | -0.854542 | -1.346810 | 3.630691  |
| C | -1.889594 | -2.726511 | 1.819295  |
| C | -3.048147 | -0.682819 | 2.684660  |
| C | 1.632601  | -1.441401 | -1.258278 |
| C | -2.735567 | 0.546469  | -0.278026 |
| C | -3.841623 | -0.125830 | -0.815774 |
| C | -5.007322 | 0.607069  | -1.016466 |
| C | -5.072477 | 1.952203  | -0.699215 |
| C | -3.950365 | 2.604095  | -0.219384 |
| C | -2.752172 | 1.924820  | -0.022919 |
| C | -1.521349 | 2.713020  | 0.397672  |
| C | -1.195361 | 3.800645  | -0.629862 |
| C | -1.681360 | 3.316613  | 1.794576  |
| C | -3.815312 | -1.587916 | -1.229253 |
| C | -4.925417 | -2.398531 | -0.557478 |
| C | -3.896207 | -1.716772 | -2.753408 |
| C | 1.352468  | -1.445706 | -2.753408 |
| C | 2.873992  | -0.645319 | -0.907924 |
| C | 3.991725  | -1.280682 | -0.450515 |
| C | 5.178641  | -0.559557 | -0.156015 |
| C | 5.190949  | 0.843199  | -0.334760 |
| C | 4.012360  | 1.483160  | -0.802692 |
| C | 2.889951  | 0.763095  | -1.082324 |
| C | 6.349444  | -1.204975 | 0.316409  |
| C | 7.476133  | -0.484426 | 0.592831  |
| C | 7.489345  | 0.917747  | 0.411821  |
| C | 6.374852  | 1.565317  | -0.039770 |
| H | 1.289659  | -0.277345 | 1.337898  |
| H | 0.676154  | -1.937668 | 1.337840  |
| H | -0.828490 | 0.578097  | 1.827116  |
| H | -0.885462 | -0.392061 | -1.987423 |
| H | -0.698805 | -0.342706 | 4.034388  |
| H | 0.122967  | -1.810112 | 3.478844  |

|                                            |           |           |           |   |           |           |           |
|--------------------------------------------|-----------|-----------|-----------|---|-----------|-----------|-----------|
| H                                          | -1.380655 | -1.933456 | 4.386107  | C | -0.617672 | 3.625201  | -0.349516 |
| H                                          | -0.944510 | -3.230961 | 1.606177  | C | -1.221129 | 3.137495  | 2.051724  |
| H                                          | -2.496654 | -2.746093 | 0.913953  | C | -3.979095 | -1.216297 | -1.352807 |
| H                                          | -2.408919 | -3.320622 | 2.574191  | C | -5.164193 | -1.948176 | -0.719818 |
| H                                          | -2.935682 | 0.347076  | 3.034952  | C | -4.118985 | -1.179039 | -2.877735 |
| H                                          | -3.731900 | -0.677777 | 1.835554  | C | 1.302799  | -1.486453 | -2.844317 |
| H                                          | -3.518930 | -1.256487 | 3.485989  | C | 2.799163  | -0.722849 | -0.960078 |
| H                                          | 1.781681  | -2.472395 | -0.925608 | C | 3.939252  | -1.330592 | -0.520910 |
| H                                          | -5.880409 | 0.114671  | -1.429571 | C | 5.092375  | -0.573347 | -0.183494 |
| H                                          | -5.995871 | 2.499748  | -0.848628 | C | 5.046124  | 0.835329  | -0.299651 |
| H                                          | -3.999540 | 3.667719  | -0.014536 | C | 3.845609  | 1.445433  | -0.751042 |
| H                                          | -0.661900 | 2.040570  | 0.413882  | C | 2.757532  | 0.691409  | -1.072401 |
| H                                          | -0.268106 | 4.307691  | -0.354317 | C | 6.285998  | -1.188325 | 0.272143  |
| H                                          | -1.068970 | 3.375602  | -1.627861 | C | 7.378299  | -0.433267 | 0.591846  |
| H                                          | -1.985450 | 4.553193  | -0.678305 | C | 7.332705  | 0.974788  | 0.473149  |
| H                                          | -0.765143 | 3.830962  | 2.091929  | C | 6.195216  | 1.593511  | 0.039015  |
| H                                          | -1.902436 | 2.554061  | 2.545525  | H | 1.246999  | -0.761419 | 1.343894  |
| H                                          | -2.495529 | 4.045203  | 1.812202  | H | 0.476310  | -2.342495 | 1.140647  |
| H                                          | -2.862321 | -2.018210 | -0.920486 | H | -0.795768 | 0.242478  | 1.893820  |
| H                                          | -4.819581 | -3.456056 | -0.808922 | H | -0.851187 | -0.286123 | -2.000752 |
| H                                          | -4.892418 | -2.304197 | 0.530257  | H | -0.751093 | -0.954344 | 3.979813  |
| H                                          | -5.913133 | -2.074869 | -0.893202 | H | -0.109727 | -2.441125 | 3.262493  |
| H                                          | -3.835806 | -2.767108 | -3.046475 | H | -1.627002 | -2.478516 | 4.154735  |
| H                                          | -3.082848 | -1.178677 | -3.246476 | H | -1.290272 | -3.482509 | 1.224363  |
| H                                          | -4.839393 | -1.314082 | -3.130887 | H | -2.779375 | -2.758023 | 0.607979  |
| H                                          | 2.214778  | -1.877717 | -3.259494 | H | -2.762059 | -3.538713 | 2.184702  |
| H                                          | 0.479499  | -2.053622 | -2.997374 | H | -2.896868 | 0.077585  | 3.106949  |
| H                                          | 1.209365  | -0.435741 | -3.143257 | H | -3.773636 | -0.660857 | 1.763124  |
| H                                          | 3.988045  | -2.357268 | -0.306120 | H | -3.678308 | -1.492262 | 3.314300  |
| H                                          | 4.019904  | 2.559718  | -0.936992 | H | 1.773023  | -2.587789 | -1.071461 |
| H                                          | 1.999176  | 1.272695  | -1.437049 | H | -5.795973 | 0.758724  | -1.365169 |
| H                                          | 6.334792  | -2.281140 | 0.454238  | H | -5.582555 | 3.078148  | -0.577679 |
| H                                          | 8.367533  | -0.984836 | 0.953115  | H | -3.444905 | 3.883765  | 0.330988  |
| H                                          | 8.391335  | 1.476162  | 0.634161  | H | -0.374718 | 1.776521  | 0.644018  |
| H                                          | 6.380056  | 2.641223  | -0.179896 | H | 0.361853  | 3.990821  | -0.033196 |
| $\omega$ B97X energy = -1315.45992597 a.u. |           |           |           | H | -0.519182 | 3.210195  | -1.355255 |
| (5S,1'S)- <b>3a</b> , Conf. B              |           |           |           | H | -1.295361 | 4.480590  | -0.399607 |
| C                                          | 0.397909  | -1.282062 | 0.900597  | H | -0.246674 | 3.508253  | 2.376322  |
| C                                          | -0.962179 | -0.670128 | 1.318417  | H | -1.555046 | 2.384017  | 2.769493  |
| N                                          | -1.523987 | -0.263078 | -0.008047 | H | -1.926534 | 3.970815  | 2.092465  |
| C                                          | -0.661637 | -0.540084 | -0.965615 | H | -3.077577 | -1.787002 | -1.127756 |
| N                                          | 0.427899  | -1.122864 | -0.557009 | H | -5.219363 | -2.969936 | -1.101886 |
| C                                          | -1.835573 | -1.594484 | 2.195746  | H | -5.076248 | -1.998184 | 0.367659  |
| C                                          | -1.024821 | -1.880909 | 3.467845  | H | -6.108638 | -1.453577 | -0.957963 |
| C                                          | -2.179549 | -2.913519 | 1.504764  | H | -4.190696 | -2.194206 | -3.274035 |
| C                                          | -3.120530 | -0.870819 | 2.610296  | H | -3.262741 | -0.689467 | -3.347605 |
| C                                          | 1.587973  | -1.547757 | -1.351586 | H | -5.020176 | -0.637676 | -3.175988 |
| C                                          | -2.624427 | 0.652382  | -0.212888 | H | 2.164891  | -1.891076 | -3.372907 |
| C                                          | -3.809735 | 0.188709  | -0.799501 | H | 0.429731  | -2.085643 | -3.108053 |
| C                                          | -4.864289 | 1.088915  | -0.919622 | H | 1.155197  | -0.461344 | -3.190054 |
| C                                          | -4.744342 | 2.397116  | -0.485825 | H | 3.979899  | -2.411684 | -0.423450 |
| C                                          | -3.543790 | 2.845000  | 0.036232  | H | 3.807977  | 2.526103  | -0.839347 |
| C                                          | -2.451802 | 1.992067  | 0.162517  | H | 1.850212  | 1.179855  | -1.415156 |
| C                                          | -1.125319 | 2.567921  | 0.635365  | H | 6.317251  | -2.269110 | 0.362784  |
|                                            |           |           |           | H | 8.287142  | -0.910964 | 0.939119  |
|                                            |           |           |           | H | 8.207675  | 1.560945  | 0.729523  |



H 6.154822 2.673800 -0.053593  
 ωB97X energy = -1315.45991975 a.u.

(5S,1'S)-**3a**, Conf. C

|   |           |           |           |
|---|-----------|-----------|-----------|
| C | -0.381247 | -1.407081 | 0.573081  |
| C | 0.937792  | -0.807491 | 1.123745  |
| N | 1.548283  | -0.242575 | -0.121572 |
| C | 0.718528  | -0.388243 | -1.132770 |
| N | -0.399333 | -0.983616 | -0.831650 |
| C | 0.747107  | 0.171527  | 2.305943  |
| C | -0.179541 | 1.338665  | 1.964094  |
| C | 2.100278  | 0.707385  | 2.784527  |
| C | 0.137743  | -0.647849 | 3.452502  |
| C | -1.530425 | -1.221032 | -1.742005 |
| C | 2.916866  | 0.189366  | -0.285120 |
| C | 3.188051  | 1.537266  | -0.563342 |
| C | 4.522555  | 1.921483  | -0.652082 |
| C | 5.546616  | 1.008761  | -0.473336 |
| C | 5.251795  | -0.323722 | -0.248303 |
| C | 3.935159  | -0.767898 | -0.175460 |
| C | 3.674479  | -2.259331 | -0.030168 |
| C | 4.319434  | -3.040423 | -1.178647 |
| C | 4.157500  | -2.788840 | 1.321908  |
| C | 2.111919  | 2.581044  | -0.815088 |
| C | 2.243468  | 3.788320  | 0.115406  |
| C | 2.127887  | 3.026083  | -2.280887 |
| C | -1.681557 | -2.709950 | -2.011101 |
| C | -2.763394 | -0.525745 | -1.185234 |
| C | -3.904842 | -1.198616 | -0.858125 |
| C | -5.037251 | -0.517226 | -0.335220 |
| C | -4.974147 | 0.881889  | -0.145693 |
| C | -3.777733 | 1.562962  | -0.495013 |
| C | -2.711954 | 0.882607  | -0.999599 |
| C | -6.229020 | -1.205449 | 0.005745  |
| C | -7.302106 | -0.528143 | 0.511329  |
| C | -7.237680 | 0.870983  | 0.702286  |
| C | -6.102072 | 1.559056  | 0.381756  |
| H | -0.395905 | -2.495606 | 0.629012  |
| H | -1.265515 | -1.020857 | 1.078264  |
| H | 1.588056  | -1.608017 | 1.476576  |
| H | 0.951295  | -0.045804 | -2.133861 |
| H | -1.176648 | 1.009461  | 1.660720  |
| H | 0.227399  | 1.962821  | 1.167380  |
| H | -0.302640 | 1.973107  | 2.844273  |
| H | 2.573350  | 1.361527  | 2.052397  |
| H | 2.794629  | -0.107227 | 3.008928  |
| H | 1.957346  | 1.283517  | 3.701309  |
| H | -0.849038 | -1.046162 | 3.206890  |
| H | 0.785643  | -1.485244 | 3.725799  |
| H | 0.023430  | -0.011926 | 4.332336  |
| H | -1.255753 | -0.723693 | -2.675788 |
| H | 4.763108  | 2.957311  | -0.862951 |
| H | 6.578960  | 1.333832  | -0.531597 |
| H | 6.060340  | -1.039060 | -0.147939 |
| H | 2.600688  | -2.437481 | -0.104249 |

|   |           |           |           |
|---|-----------|-----------|-----------|
| H | 4.060717  | -4.098487 | -1.100214 |
| H | 3.975135  | -2.674240 | -2.147984 |
| H | 5.408536  | -2.961622 | -1.153103 |
| H | 3.927110  | -3.851895 | 1.418062  |
| H | 3.689358  | -2.262859 | 2.157795  |
| H | 5.239067  | -2.669431 | 1.421545  |
| H | 1.137143  | 2.130690  | -0.625822 |
| H | 1.416819  | 4.481495  | -0.054794 |
| H | 2.226835  | 3.493720  | 1.167005  |
| H | 3.173608  | 4.331143  | -0.066914 |
| H | 1.321025  | 3.737970  | -2.467614 |
| H | 2.001613  | 2.181369  | -2.962290 |
| H | 3.072767  | 3.515329  | -2.529663 |
| H | -2.471441 | -2.876058 | -2.743564 |
| H | -0.750505 | -3.107689 | -2.415278 |
| H | -1.932426 | -3.265782 | -1.106092 |
| H | -3.978088 | -2.271952 | -0.992195 |
| H | -3.726404 | 2.637865  | -0.357562 |
| H | -1.808730 | 1.423678  | -1.264908 |
| H | -6.274850 | -2.279347 | -0.142419 |
| H | -8.210159 | -1.061126 | 0.768642  |
| H | -8.096634 | 1.394950  | 1.105385  |
| H | -6.047147 | 2.632973  | 0.526267  |

ωB97X energy = -1315.45958735 a.u.

(5S,1'S)-**3a**, Conf. D

|   |           |           |           |
|---|-----------|-----------|-----------|
| C | -0.273201 | -1.734884 | 0.325382  |
| C | 0.928016  | -1.028413 | 0.999801  |
| N | 1.519043  | -0.286897 | -0.159702 |
| C | 0.733440  | -0.400384 | -1.210000 |
| N | -0.317058 | -1.145012 | -1.017473 |
| C | 0.557002  | -0.180081 | 2.238626  |
| C | 0.003284  | -1.155649 | 3.286812  |
| C | -0.495842 | 0.885128  | 1.928344  |
| C | 1.808847  | 0.477365  | 2.827948  |
| C | -1.448875 | -1.313218 | -1.944082 |
| C | 2.835697  | 0.302844  | -0.218747 |
| C | 2.966271  | 1.691754  | -0.365888 |
| C | 4.252153  | 2.223354  | -0.355350 |
| C | 5.363944  | 1.413453  | -0.206902 |
| C | 5.210422  | 0.041934  | -0.112785 |
| C | 3.949321  | -0.545092 | -0.142192 |
| C | 3.846246  | -2.062069 | -0.139417 |
| C | 4.604871  | -2.663933 | -1.325513 |
| C | 4.339926  | -2.661064 | 1.179457  |
| C | 1.792744  | 2.634388  | -0.579811 |
| C | 1.742783  | 3.750454  | 0.465569  |
| C | 1.826963  | 3.220979  | -1.994506 |
| C | -1.661556 | -2.787115 | -2.247426 |
| C | -2.652025 | -0.577326 | -1.374668 |
| C | -3.705936 | -1.223148 | -0.794631 |
| C | -4.791210 | -0.501041 | -0.229381 |
| C | -4.775363 | 0.912000  | -0.270965 |
| C | -3.673677 | 1.563500  | -0.886373 |
| C | -2.648123 | 0.842873  | -1.418614 |

|   |           |           |           |
|---|-----------|-----------|-----------|
| C | -5.888539 | -1.160324 | 0.380826  |
| C | -6.917550 | -0.442663 | 0.920523  |
| C | -6.901913 | 0.970394  | 0.877569  |
| C | -5.857665 | 1.631098  | 0.295887  |
| H | -0.127585 | -2.812043 | 0.244064  |
| H | -1.215889 | -1.547268 | 0.837291  |
| H | 1.656597  | -1.769956 | 1.326901  |
| H | 0.948680  | 0.079329  | -2.157474 |
| H | 0.734254  | -1.931839 | 3.528710  |
| H | -0.918323 | -1.643122 | 2.961854  |
| H | -0.222476 | -0.610932 | 4.205458  |
| H | -0.134814 | 1.617369  | 1.204655  |
| H | -0.746283 | 1.426399  | 2.843092  |
| H | -1.424479 | 0.456726  | 1.541065  |
| H | 2.588612  | -0.263463 | 3.026860  |
| H | 2.228182  | 1.239397  | 2.171520  |
| H | 1.556480  | 0.957684  | 3.775734  |
| H | -1.146330 | -0.807487 | -2.863588 |
| H | 4.384905  | 3.293672  | -0.465393 |
| H | 6.354913  | 1.851852  | -0.185793 |
| H | 6.089173  | -0.588601 | -0.036348 |
| H | 2.799808  | -2.341022 | -0.271639 |
| H | 4.453066  | -3.745027 | -1.354937 |
| H | 4.256771  | -2.243640 | -2.271235 |
| H | 5.678705  | -2.480106 | -1.246584 |
| H | 4.203287  | -3.744494 | 1.178420  |
| H | 3.804960  | -2.251366 | 2.040012  |
| H | 5.403590  | -2.457107 | 1.324731  |
| H | 0.865876  | 2.067099  | -0.489183 |
| H | 0.853946  | 4.365544  | 0.309399  |
| H | 1.703207  | 3.351984  | 1.481660  |
| H | 2.615466  | 4.403322  | 0.393763  |
| H | 0.949958  | 3.849399  | -2.163558 |
| H | 1.837317  | 2.437491  | -2.755956 |
| H | 2.717060  | 3.837586  | -2.140916 |
| H | -2.476071 | -2.899694 | -2.962765 |
| H | -0.755977 | -3.210022 | -2.682829 |
| H | -1.912294 | -3.360319 | -1.353693 |
| H | -3.741742 | -2.306417 | -0.753270 |
| H | -3.663103 | 2.647405  | -0.931267 |
| H | -1.818731 | 1.360760  | -1.891639 |
| H | -5.897109 | -2.244934 | 0.411704  |
| H | -7.752989 | -0.953613 | 1.385021  |
| H | -7.725711 | 1.526759  | 1.309575  |
| H | -5.841537 | 2.715374  | 0.259829  |

$\omega$ B97X energy = -1315.45952303 a.u.

(5S,1'S)-**3a**, Conf. E

|   |           |           |           |
|---|-----------|-----------|-----------|
| C | -0.212786 | -1.553426 | -1.172003 |
| C | 1.072261  | -0.729712 | -1.432577 |
| N | 1.413089  | -0.272980 | -0.049022 |
| C | 0.564769  | -0.786917 | 0.818200  |
| N | -0.349705 | -1.547246 | 0.288631  |
| C | 2.178216  | -1.490499 | -2.199093 |
| C | 1.586862  | -1.859860 | -3.566860 |

|   |           |           |           |
|---|-----------|-----------|-----------|
| C | 2.629870  | -2.761201 | -1.479672 |
| C | 3.380571  | -0.572651 | -2.440275 |
| C | -1.460504 | -2.232079 | 0.956269  |
| C | 2.299963  | 0.815911  | 0.291994  |
| C | 3.471249  | 0.552536  | 1.015142  |
| C | 4.323590  | 1.621692  | 1.273784  |
| C | 4.023391  | 2.900466  | 0.839401  |
| C | 2.834493  | 3.142977  | 0.174499  |
| C | 1.936516  | 2.114353  | -0.092947 |
| C | 0.600537  | 2.456209  | -0.735079 |
| C | -0.200448 | 3.417316  | 0.147851  |
| C | 0.775993  | 3.025850  | -2.144287 |
| C | 3.824186  | -0.817085 | 1.570720  |
| C | 5.205634  | -1.291733 | 1.116549  |
| C | 3.730012  | -0.813578 | 3.099739  |
| C | -1.243803 | -2.329032 | 2.459454  |
| C | -2.779096 | -1.557596 | 0.614733  |
| C | -2.919923 | -0.199370 | 0.670199  |
| C | -4.162597 | 0.422285  | 0.393586  |
| C | -5.275458 | -0.385204 | 0.059147  |
| C | -5.106373 | -1.791982 | 0.008864  |
| C | -3.894829 | -2.360565 | 0.275174  |
| C | -4.322658 | 1.831909  | 0.443072  |
| C | -5.532665 | 2.402829  | 0.174666  |
| C | -6.646045 | 1.595441  | -0.159668 |
| C | -6.520539 | 0.237624  | -0.216482 |
| H | -1.099498 | -1.102876 | -1.619778 |
| H | -0.132724 | -2.582813 | -1.519028 |
| H | 0.832885  | 0.155552  | -2.022821 |
| H | 0.626006  | -0.575069 | 1.878197  |
| H | 1.226214  | -0.972683 | -4.094363 |
| H | 0.761058  | -2.570262 | -3.487986 |
| H | 2.359049  | -2.325004 | -4.182437 |
| H | 1.804288  | -3.451580 | -1.291190 |
| H | 3.112883  | -2.540752 | -0.527187 |
| H | 3.357015  | -3.290209 | -2.099282 |
| H | 3.081061  | 0.344563  | -2.955361 |
| H | 3.881925  | -0.290667 | -1.514374 |
| H | 4.109938  | -1.085950 | -3.070695 |
| H | -1.470751 | -3.242511 | 0.539369  |
| H | 5.240326  | 1.448791  | 1.826238  |
| H | 4.708882  | 3.715685  | 1.040100  |
| H | 2.588930  | 4.155863  | -0.124867 |
| H | 0.002171  | 1.547351  | -0.812692 |
| H | -1.180181 | 3.602504  | -0.299151 |
| H | -0.353097 | 3.001482  | 1.146476  |
| H | 0.305276  | 4.379635  | 0.254592  |
| H | -0.198230 | 3.203627  | -2.604270 |
| H | 1.338834  | 2.346652  | -2.789651 |
| H | 1.312254  | 3.977445  | -2.117390 |
| H | 3.092842  | -1.538056 | 1.204794  |
| H | 5.392945  | -2.301157 | 1.488961  |
| H | 5.290588  | -1.311343 | 0.027782  |
| H | 5.995134  | -0.643720 | 1.503628  |
| H | 3.935976  | -1.811235 | 3.493225  |
| H | 2.737184  | -0.511163 | 3.441515  |

|   |           |           |           |
|---|-----------|-----------|-----------|
| H | 4.456640  | -0.122510 | 3.534122  |
| H | -2.051575 | -2.922803 | 2.886056  |
| H | -0.297650 | -2.820071 | 2.693531  |
| H | -1.274426 | -1.346397 | 2.934426  |
| H | -2.078384 | 0.438103  | 0.929925  |
| H | -5.956426 | -2.413335 | -0.252470 |
| H | -3.777512 | -3.438227 | 0.225503  |
| H | -3.466006 | 2.447246  | 0.700677  |
| H | -5.648061 | 3.479746  | 0.216761  |
| H | -7.600726 | 2.063601  | -0.369785 |
| H | -7.371082 | -0.385323 | -0.472970 |

ωB97X energy = -1315.45919558 energy

(5S,1'S)-**3a**, Conf. F

|   |           |           |           |
|---|-----------|-----------|-----------|
| C | -1.158175 | 2.545309  | -0.767782 |
| C | -2.219630 | 1.532784  | -0.271014 |
| N | -1.410488 | 0.275900  | -0.217438 |
| C | -0.141593 | 0.551773  | -0.422920 |
| N | 0.109345  | 1.812267  | -0.644299 |
| C | -2.932389 | 1.945047  | 1.039397  |
| C | -3.736020 | 3.213530  | 0.719727  |
| C | -1.951178 | 2.233551  | 2.176460  |
| C | -3.924879 | 0.862799  | 1.476434  |
| C | 1.428354  | 2.385406  | -0.989501 |
| C | -1.906774 | -1.071575 | -0.077423 |
| C | -1.550920 | -1.825283 | 1.051834  |
| C | -2.095330 | -3.100017 | 1.172996  |
| C | -2.960589 | -3.606549 | 0.219696  |
| C | -3.258174 | -2.861220 | -0.906785 |
| C | -2.717357 | -1.593045 | -1.094973 |
| C | -2.989336 | -0.869318 | -2.404584 |
| C | -2.525195 | -1.709332 | -3.597896 |
| C | -4.465562 | -0.493113 | -2.550003 |
| C | -0.581804 | -1.345316 | 2.121823  |
| C | -1.185648 | -1.420025 | 3.525782  |
| C | 0.730308  | -2.133690 | 2.056553  |
| C | 1.541508  | 3.805377  | -0.448391 |
| C | 2.529592  | 1.483195  | -0.477864 |
| C | 3.372697  | 0.858145  | -1.350745 |
| C | 4.413486  | 0.009431  | -0.888329 |
| C | 4.564513  | -0.195497 | 0.502618  |
| C | 3.674396  | 0.463672  | 1.392119  |
| C | 2.692391  | 1.280765  | 0.919626  |
| C | 5.297734  | -0.645355 | -1.782299 |
| C | 6.282375  | -1.464784 | -1.308507 |
| C | 6.432652  | -1.670613 | 0.081895  |
| C | 5.594633  | -1.052096 | 0.965578  |
| H | -1.307516 | 2.827066  | -1.811746 |
| H | -1.132329 | 3.448026  | -0.163044 |
| H | -2.992398 | 1.403522  | -1.028391 |
| H | 0.627048  | -0.210152 | -0.415636 |
| H | -4.456309 | 3.031551  | -0.082492 |
| H | -3.101351 | 4.051716  | 0.424294  |
| H | -4.292804 | 3.522815  | 1.606267  |
| H | -1.253360 | 3.037893  | 1.932260  |

|   |           |           |           |
|---|-----------|-----------|-----------|
| H | -1.371609 | 1.350094  | 2.448617  |
| H | -2.504337 | 2.544943  | 3.064978  |
| H | -4.616472 | 0.605470  | 0.669287  |
| H | -3.428949 | -0.052533 | 1.799140  |
| H | -4.517280 | 1.232977  | 2.315917  |
| H | 1.483356  | 2.419149  | -2.081202 |
| H | -1.839587 | -3.706704 | 2.034250  |
| H | -3.387956 | -4.594596 | 0.345362  |
| H | -3.906187 | -3.280856 | -1.668085 |
| H | -2.398053 | 0.047055  | -2.427556 |
| H | -2.657163 | -1.146149 | -4.524207 |
| H | -1.470103 | -1.975096 | -3.506432 |
| H | -3.101457 | -2.633052 | -3.685108 |
| H | -4.626338 | 0.057814  | -3.479036 |
| H | -4.812861 | 0.128914  | -1.721175 |
| H | -5.093088 | -1.387411 | -2.577565 |
| H | -0.338663 | -0.298980 | 1.934864  |
| H | -0.488290 | -0.998782 | 4.253039  |
| H | -2.122960 | -0.863160 | 3.592404  |
| H | -1.386003 | -2.452746 | 3.818976  |
| H | 1.435736  | -1.754457 | 2.799521  |
| H | 1.203541  | -2.057773 | 1.073983  |
| H | 0.558859  | -3.193343 | 2.261200  |
| H | 2.532176  | 4.190981  | -0.687954 |
| H | 0.805779  | 4.468228  | -0.905022 |
| H | 1.414689  | 3.831499  | 0.635469  |
| H | 3.255037  | 1.002061  | -2.420642 |
| H | 3.791018  | 0.308436  | 2.459485  |
| H | 2.022644  | 1.774234  | 1.616834  |
| H | 5.177814  | -0.485391 | -2.848622 |
| H | 6.954630  | -1.962440 | -1.997815 |
| H | 7.217822  | -2.324698 | 0.443107  |
| H | 5.706761  | -1.207032 | 2.033508  |

ωB97X energy = -1315.45893233 a.u.

(5S,1'S)-**3a**, Conf. G

|   |           |           |           |
|---|-----------|-----------|-----------|
| C | 0.129730  | -2.244910 | 0.311852  |
| C | 1.148645  | -1.273978 | 0.958728  |
| N | 1.438555  | -0.350334 | -0.184452 |
| C | 0.644287  | -0.627664 | -1.195589 |
| N | -0.148987 | -1.641647 | -0.996804 |
| C | 0.653963  | -0.614896 | 2.267988  |
| C | 0.464345  | -1.751795 | 3.282690  |
| C | -0.668859 | 0.132632  | 2.087604  |
| C | 1.717448  | 0.334815  | 2.828043  |
| C | -1.324811 | -1.976527 | -1.819414 |
| C | 2.522592  | 0.599350  | -0.271973 |
| C | 2.233658  | 1.970490  | -0.346776 |
| C | 3.307997  | 2.854462  | -0.366726 |
| C | 4.614028  | 2.400830  | -0.316703 |
| C | 4.872070  | 1.042048  | -0.293697 |
| C | 3.836694  | 0.112668  | -0.296709 |
| C | 4.177985  | -1.366810 | -0.373936 |
| C | 5.010716  | -1.671468 | -1.622167 |
| C | 4.896215  | -1.849316 | 0.888062  |

|   |           |           |           |
|---|-----------|-----------|-----------|
| C | 0.826365  | 2.538351  | -0.448823 |
| C | 0.523174  | 3.540906  | 0.666814  |
| C | 0.602678  | 3.178810  | -1.822230 |
| C | -1.352066 | -3.465805 | -2.119722 |
| C | -2.568081 | -1.420418 | -1.138487 |
| C | -2.874361 | -0.096917 | -1.303426 |
| C | -3.969917 | 0.499912  | -0.634371 |
| C | -4.768723 | -0.298623 | 0.217847  |
| C | -4.443929 | -1.669868 | 0.366345  |
| C | -3.377748 | -2.215842 | -0.290013 |
| C | -4.285020 | 1.875590  | -0.788879 |
| C | -5.345969 | 2.421915  | -0.127550 |
| C | -6.148280 | 1.622251  | 0.721343  |
| C | -5.867898 | 0.297471  | 0.889809  |
| H | 0.540100  | -3.244808 | 0.172691  |
| H | -0.794553 | -2.321456 | 0.882911  |
| H | 2.068673  | -1.808273 | 1.195705  |
| H | 0.656196  | -0.063350 | -2.120329 |
| H | 1.396928  | -2.301447 | 3.436576  |
| H | -0.305399 | -2.464307 | 2.978438  |
| H | 0.159464  | -1.332302 | 4.243234  |
| H | -1.476342 | -0.518630 | 1.741152  |
| H | -0.577649 | 0.960874  | 1.383533  |
| H | -0.981864 | 0.552618  | 3.045712  |
| H | 2.681302  | -0.170055 | 2.939491  |
| H | 1.867823  | 1.212546  | 2.200195  |
| H | 1.408448  | 0.682622  | 3.816179  |
| H | -1.182811 | -1.433670 | -2.755691 |
| H | 3.116962  | 3.920228  | -0.422060 |
| H | 5.433989  | 3.109620  | -0.317705 |
| H | 5.899089  | 0.694217  | -0.294566 |
| H | 3.251603  | -1.933450 | -0.478090 |
| H | 5.176679  | -2.747532 | -1.706339 |
| H | 4.503926  | -1.331665 | -2.527614 |
| H | 5.988218  | -1.186063 | -1.577935 |
| H | 5.083889  | -2.923471 | 0.829488  |
| H | 4.311272  | -1.654391 | 1.790536  |
| H | 5.859251  | -1.346062 | 1.003850  |
| H | 0.108419  | 1.722930  | -0.353997 |
| H | -0.514259 | 3.875144  | 0.594274  |
| H | 0.668670  | 3.102636  | 1.656446  |
| H | 1.162379  | 4.423416  | 0.592115  |
| H | -0.428709 | 3.527144  | -1.912134 |
| H | 0.797371  | 2.474274  | -2.634294 |
| H | 1.261873  | 4.038659  | -1.963687 |
| H | -2.224292 | -3.697941 | -2.730915 |
| H | -0.454949 | -3.751892 | -2.668995 |
| H | -1.404816 | -4.069678 | -1.212668 |
| H | -2.270049 | 0.528200  | -1.956560 |
| H | -5.058788 | -2.286849 | 1.012972  |
| H | -3.159428 | -3.269286 | -0.159549 |
| H | -3.667341 | 2.484480  | -1.441110 |
| H | -5.580135 | 3.473151  | -0.249265 |
| H | -6.989294 | 2.070519  | 1.237645  |
| H | -6.480388 | -0.318816 | 1.539535  |

ωB97X energy = -1315.45857243 a.u.

(5S,1'S)-**3a**, Conf. H

|   |           |           |           |
|---|-----------|-----------|-----------|
| C | -1.031726 | 2.353764  | -1.190701 |
| C | -2.122962 | 1.285410  | -0.928281 |
| N | -1.368222 | 0.283210  | -0.110451 |
| C | -0.108168 | 0.650564  | -0.005485 |
| N | 0.172817  | 1.785195  | -0.578685 |
| C | -3.431612 | 1.849454  | -0.330970 |
| C | -3.976523 | 2.849186  | -1.361570 |
| C | -3.219050 | 2.562073  | 1.004835  |
| C | -4.468695 | 0.734474  | -0.162550 |
| C | 1.455191  | 2.511993  | -0.509008 |
| C | -1.804483 | -1.058479 | 0.206034  |
| C | -2.054111 | -1.401870 | 1.541612  |
| C | -2.530157 | -2.683781 | 1.799834  |
| C | -2.743092 | -3.590148 | 0.776641  |
| C | -2.436559 | -3.244218 | -0.527604 |
| C | -1.938375 | -1.983044 | -0.839001 |
| C | -1.520729 | -1.692605 | -2.272281 |
| C | -0.434176 | -2.669226 | -2.731064 |
| C | -2.715958 | -1.719554 | -3.227149 |
| C | -1.785664 | -0.470998 | 2.711585  |
| C | -3.027028 | -0.262453 | 3.581324  |
| C | -0.616934 | -0.990051 | 3.554654  |
| C | 1.444056  | 3.480315  | 0.663869  |
| C | 2.600205  | 1.517889  | -0.536286 |
| C | 3.419235  | 1.299297  | 0.533334  |
| C | 4.469669  | 0.343154  | 0.470223  |
| C | 4.662378  | -0.391990 | -0.721619 |
| C | 3.799674  | -0.145033 | -1.823504 |
| C | 2.804316  | 0.778344  | -1.733435 |
| C | 5.326161  | 0.102619  | 1.574070  |
| C | 6.324686  | -0.825823 | 1.489277  |
| C | 6.517918  | -1.559028 | 0.296743  |
| C | 5.707402  | -1.347024 | -0.782284 |
| H | -0.857145 | 2.524628  | -2.252478 |
| H | -1.262577 | 3.307715  | -0.716637 |
| H | -2.390154 | 0.796977  | -1.867339 |
| H | 0.636330  | 0.046752  | 0.499738  |
| H | -4.132601 | 2.371075  | -2.332429 |
| H | -3.311350 | 3.703960  | -1.504018 |
| H | -4.938134 | 3.236634  | -1.019842 |
| H | -2.509535 | 3.389775  | 0.932909  |
| H | -2.865558 | 1.879526  | 1.777435  |
| H | -4.167975 | 2.980611  | 1.346587  |
| H | -4.632335 | 0.200265  | -1.102715 |
| H | -4.178913 | 0.005444  | 0.594551  |
| H | -5.422445 | 1.170315  | 0.142874  |
| H | 1.492943  | 3.085475  | -1.438957 |
| H | -2.735307 | -2.977264 | 2.823163  |
| H | -3.128438 | -4.578506 | 0.999008  |
| H | -2.567060 | -3.975249 | -1.317695 |
| H | -1.074611 | -0.697709 | -2.315143 |
| H | -0.090790 | -2.401102 | -3.732501 |
| H | 0.425418  | -2.648400 | -2.057405 |

|   |           |           |           |
|---|-----------|-----------|-----------|
| H | -0.809834 | -3.694173 | -2.770722 |
| H | -2.396273 | -1.473392 | -4.241825 |
| H | -3.488555 | -1.005688 | -2.930961 |
| H | -3.173074 | -2.711737 | -3.250785 |
| H | -1.490582 | 0.501747  | 2.317282  |
| H | -2.817560 | 0.473577  | 4.360645  |
| H | -3.876606 | 0.096265  | 2.996017  |
| H | -3.327022 | -1.190273 | 4.073592  |
| H | -0.392770 | -0.287154 | 4.359826  |
| H | 0.286544  | -1.120395 | 2.954319  |
| H | -0.858687 | -1.954997 | 4.007198  |
| H | 2.364367  | 4.064643  | 0.674215  |
| H | 0.606208  | 4.172986  | 0.574119  |
| H | 1.350552  | 2.953177  | 1.614975  |
| H | 3.291267  | 1.853147  | 1.456911  |
| H | 3.950905  | -0.700658 | -2.742889 |
| H | 2.154433  | 0.960614  | -2.583889 |
| H | 5.174661  | 0.667308  | 2.488098  |
| H | 6.974915  | -1.004334 | 2.337887  |
| H | 7.313998  | -2.292643 | 0.243605  |
| H | 5.851847  | -1.907038 | -1.700233 |

ωB97X energy = -1315.45817849 a.u.

(5S,1'S)-**3a**, Conf. I

|   |           |           |           |
|---|-----------|-----------|-----------|
| C | 1.020358  | -2.387296 | -1.113774 |
| C | 2.075945  | -1.261221 | -0.987194 |
| N | 1.385950  | -0.308895 | -0.058749 |
| C | 0.142333  | -0.702984 | 0.129002  |
| N | -0.157396 | -1.835127 | -0.438456 |
| C | 3.487572  | -1.749693 | -0.598706 |
| C | 3.927996  | -2.712563 | -1.711030 |
| C | 3.521678  | -2.478984 | 0.743973  |
| C | 4.469424  | -0.573471 | -0.577158 |
| C | -1.433939 | -2.562844 | -0.306908 |
| C | 1.788800  | 1.057517  | 0.196210  |
| C | 2.233758  | 1.416072  | 1.475779  |
| C | 2.674456  | 2.722778  | 1.662768  |
| C | 2.660153  | 3.639958  | 0.627008  |
| C | 2.159062  | 3.277232  | -0.610689 |
| C | 1.692796  | 1.987988  | -0.847944 |
| C | 1.059522  | 1.674793  | -2.195002 |
| C | -0.182477 | 2.540791  | -2.424827 |
| C | 2.058221  | 1.832037  | -3.343288 |
| C | 2.208101  | 0.473480  | 2.666947  |
| C | 3.587903  | 0.312708  | 3.308581  |
| C | 1.185494  | 0.947555  | 3.704524  |
| C | -1.400973 | -3.471958 | 0.911987  |
| C | -2.580191 | -1.570227 | -0.367002 |
| C | -3.426721 | -1.345627 | 0.679187  |
| C | -4.477757 | -0.392506 | 0.580994  |
| C | -4.640334 | 0.333824  | -0.620650 |
| C | -3.748414 | 0.081066  | -1.697867 |
| C | -2.755068 | -0.840447 | -1.575273 |
| C | -5.363802 | -0.145891 | 1.659767  |
| C | -6.361284 | 0.780290  | 1.542024  |

|   |           |           |           |
|---|-----------|-----------|-----------|
| C | -6.523846 | 1.505027  | 0.339892  |
| C | -5.684385 | 1.286974  | -0.715607 |
| H | 0.778521  | -2.618647 | -2.150403 |
| H | 1.327613  | -3.305156 | -0.610812 |
| H | 2.177135  | -0.749098 | -1.947317 |
| H | -0.576420 | -0.117601 | 0.690447  |
| H | 3.909980  | -2.223094 | -2.688609 |
| H | 3.297632  | -3.603545 | -1.761832 |
| H | 4.950398  | -3.044616 | -1.521363 |
| H | 2.895013  | -3.373472 | 0.751848  |
| H | 3.204982  | -1.836007 | 1.564791  |
| H | 4.544152  | -2.800747 | 0.953016  |
| H | 4.449631  | -0.024959 | -1.523170 |
| H | 4.257672  | 0.132742  | 0.225820  |
| H | 5.484094  | -0.950175 | -0.431349 |
| H | -1.486713 | -3.181884 | -1.206349 |
| H | 3.031060  | 3.028555  | 2.640017  |
| H | 3.019281  | 4.649282  | 0.791752  |
| H | 2.111464  | 4.015502  | -1.403313 |
| H | 0.712330  | 0.640381  | -2.194487 |
| H | -0.661303 | 2.263608  | -3.366641 |
| H | -0.910360 | 2.408359  | -1.620724 |
| H | 0.074382  | 3.601267  | -2.479266 |
| H | 1.592159  | 1.551594  | -4.290101 |
| H | 2.942517  | 1.205980  | -3.199502 |
| H | 2.395031  | 2.867772  | -3.430058 |
| H | 1.882073  | -0.507932 | 2.320739  |
| H | 3.544785  | -0.432581 | 4.105879  |
| H | 4.338668  | -0.010477 | 2.584326  |
| H | 3.930740  | 1.251258  | 3.750186  |
| H | 1.129071  | 0.233448  | 4.529023  |
| H | 0.188285  | 1.046637  | 3.269932  |
| H | 1.468672  | 1.918130  | 4.119327  |
| H | -2.314030 | -4.065685 | 0.960845  |
| H | -0.555788 | -4.158446 | 0.847410  |
| H | -1.305027 | -2.897334 | 1.835090  |
| H | -3.319526 | -1.890323 | 1.610797  |
| H | -3.875928 | 0.630171  | -2.624820 |
| H | -2.082930 | -1.027195 | -2.407510 |
| H | -5.235945 | -0.703867 | 2.581495  |
| H | -7.034505 | 0.963348  | 2.371539  |
| H | -7.319433 | 2.236855  | 0.260667  |
| H | -5.805579 | 1.839820  | -1.641247 |

ωB97X energy = -1315.45814150 a.u.

(5S,1'S)-**3a**, Conf. J

|   |           |           |           |
|---|-----------|-----------|-----------|
| C | 0.352468  | -2.347773 | 0.269978  |
| C | 1.451116  | -1.412754 | 0.840166  |
| N | 1.437652  | -0.295293 | -0.155339 |
| C | 0.524265  | -0.524977 | -1.073017 |
| N | -0.139880 | -1.634126 | -0.914314 |
| C | 1.247787  | -1.034070 | 2.325668  |
| C | 1.316309  | -2.348892 | 3.116053  |
| C | -0.096026 | -0.352803 | 2.586660  |
| C | 2.387048  | -0.133568 | 2.813694  |

|   |           |           |           |
|---|-----------|-----------|-----------|
| C | -1.355893 | -1.992907 | -1.670990 |
| C | 2.420417  | 0.755838  | -0.282710 |
| C | 2.036751  | 2.084816  | -0.049862 |
| C | 3.023470  | 3.062899  | -0.125375 |
| C | 4.335881  | 2.737987  | -0.419683 |
| C | 4.677546  | 1.425714  | -0.694023 |
| C | 3.725869  | 0.411394  | -0.657775 |
| C | 4.134532  | -0.993535 | -1.071496 |
| C | 4.692087  | -1.001751 | -2.497595 |
| C | 5.140398  | -1.603225 | -0.092810 |
| C | 0.605814  | 2.509289  | 0.237315  |
| C | 0.488850  | 3.304143  | 1.539477  |
| C | 0.031742  | 3.309149  | -0.936106 |
| C | -1.410973 | -3.494399 | -1.900074 |
| C | -2.580231 | -1.408473 | -0.988688 |
| C | -3.108170 | -0.236317 | -1.454727 |
| C | -4.216815 | 0.380333  | -0.821776 |
| C | -4.786352 | -0.236228 | 0.316217  |
| C | -4.232202 | -1.457943 | 0.777658  |
| C | -3.166714 | -2.029209 | 0.145310  |
| C | -4.766938 | 1.599352  | -1.295133 |
| C | -5.831962 | 2.171726  | -0.661541 |
| C | -6.402374 | 1.554900  | 0.476661  |
| C | -5.893255 | 0.381205  | 0.953515  |
| H | 0.745918  | -3.321016 | -0.020562 |
| H | -0.465171 | -2.496801 | 0.974378  |
| H | 2.422959  | -1.902423 | 0.767626  |
| H | 0.347684  | 0.153210  | -1.899385 |
| H | 2.270155  | -2.858174 | 2.953455  |
| H | 0.511754  | -3.038709 | 2.851467  |
| H | 1.226913  | -2.137369 | 4.183173  |
| H | -0.947496 | -0.963633 | 2.275795  |
| H | -0.169191 | 0.610384  | 2.081735  |
| H | -0.206265 | -0.169221 | 3.657414  |
| H | 3.362591  | -0.591532 | 2.628135  |
| H | 2.377929  | 0.846961  | 2.337344  |
| H | 2.291128  | 0.019080  | 3.890831  |
| H | -1.244226 | -1.498671 | -2.637728 |
| H | 2.758979  | 4.099258  | 0.052207  |
| H | 5.091385  | 3.514184  | -0.456693 |
| H | 5.700580  | 1.186493  | -0.962269 |
| H | 3.246372  | -1.627225 | -1.086578 |
| H | 4.904852  | -2.027067 | -2.807550 |
| H | 3.978728  | -0.572046 | -3.203779 |
| H | 5.622323  | -0.433456 | -2.565601 |
| H | 5.385480  | -2.625250 | -0.389218 |
| H | 4.750578  | -1.630039 | 0.927768  |
| H | 6.068067  | -1.025862 | -0.078398 |
| H | -0.007318 | 1.614156  | 0.344885  |
| H | -0.561223 | 3.514184  | 1.754300  |
| H | 0.905528  | 2.756615  | 2.387788  |
| H | 1.010602  | 4.261167  | 1.469043  |
| H | -1.016718 | 3.551442  | -0.748300 |
| H | 0.089458  | 2.751133  | -1.873834 |
| H | 0.575230  | 4.247203  | -1.073769 |
| H | -2.286381 | -3.729498 | -2.504976 |

|   |           |           |           |
|---|-----------|-----------|-----------|
| H | -0.520053 | -3.832170 | -2.430465 |
| H | -1.489731 | -4.051287 | -0.965336 |
| H | -2.681549 | 0.245646  | -2.330186 |
| H | -4.673748 | -1.938639 | 1.644158  |
| H | -2.776972 | -2.971846 | 0.513403  |
| H | -4.326405 | 2.068753  | -2.168536 |
| H | -6.247517 | 3.103090  | -1.028499 |
| H | -7.248415 | 2.020873  | 0.968507  |
| H | -6.327889 | -0.095483 | 1.825877  |

ωB97X energy = -1315.45806815 a.u.

(5S,1'S)-**3a**, Conf. K

|   |           |           |           |
|---|-----------|-----------|-----------|
| C | 1.228727  | 2.660913  | 0.318197  |
| C | 2.206044  | 1.542856  | -0.120147 |
| N | 1.379777  | 0.325101  | 0.145357  |
| C | 0.147675  | 0.675921  | 0.443632  |
| N | -0.055146 | 1.962886  | 0.474274  |
| C | 2.751686  | 1.699859  | -1.560257 |
| C | 1.638406  | 1.829293  | -2.601182 |
| C | 3.663501  | 0.523075  | -1.922475 |
| C | 3.609514  | 2.972998  | -1.566249 |
| C | -1.316677 | 2.656422  | 0.813385  |
| C | 1.829010  | -1.045372 | 0.173574  |
| C | 2.758923  | -1.424905 | 1.150970  |
| C | 3.244064  | -2.728540 | 1.112025  |
| C | 2.783467  | -3.636826 | 0.176015  |
| C | 1.808445  | -3.258793 | -0.729681 |
| C | 1.309858  | -1.960236 | -0.756006 |
| C | 0.212342  | -1.624998 | -1.754760 |
| C | 0.620263  | -1.942822 | -3.194632 |
| C | -1.089178 | -2.346752 | -1.390183 |
| C | 3.220799  | -0.504055 | 2.269434  |
| C | 2.915460  | -1.111679 | 3.641323  |
| C | 4.708442  | -0.166246 | 2.147539  |
| C | -1.566012 | 3.795647  | -0.167501 |
| C | -2.456997 | 1.660318  | 0.877037  |
| C | -2.985602 | 1.110047  | -0.260092 |
| C | -4.023766 | 0.148880  | -0.195470 |
| C | -4.525804 | -0.238143 | 1.070014  |
| C | -3.971056 | 0.350920  | 2.233264  |
| C | -2.964654 | 1.268495  | 2.139631  |
| C | -4.568415 | -0.443617 | -1.365458 |
| C | -5.562863 | -1.372761 | -1.272927 |
| C | -6.067192 | -1.757710 | -0.007308 |
| C | -5.563564 | -1.204770 | 1.133739  |
| H | 1.506717  | 3.110782  | 1.272967  |
| H | 1.142824  | 3.448454  | -0.425776 |
| H | 3.066700  | 1.519173  | 0.547551  |
| H | -0.626768 | -0.049794 | 0.652925  |
| H | 1.009015  | 0.938751  | -2.639354 |
| H | 2.080261  | 1.957752  | -3.591468 |
| H | 0.995858  | 2.694301  | -2.420256 |
| H | 3.118388  | -0.416203 | -2.014485 |
| H | 4.451259  | 0.385358  | -1.176445 |
| H | 4.146219  | 0.721226  | -2.881870 |

|   |           |           |           |
|---|-----------|-----------|-----------|
| H | 3.029935  | 3.873176  | -1.350798 |
| H | 4.418357  | 2.905092  | -0.833782 |
| H | 4.059861  | 3.103320  | -2.552050 |
| H | -1.172357 | 3.078544  | 1.812011  |
| H | 3.979641  | -3.044186 | 1.843303  |
| H | 3.170658  | -4.649107 | 0.165685  |
| H | 1.428157  | -3.987784 | -1.436247 |
| H | 0.009253  | -0.554629 | -1.711217 |
| H | -0.164500 | -1.621781 | -3.882958 |
| H | 1.544840  | -1.432326 | -3.473491 |
| H | 0.770317  | -3.014766 | -3.339909 |
| H | -1.888512 | -2.053224 | -2.074927 |
| H | -1.414072 | -2.113517 | -0.372499 |
| H | -0.965504 | -3.430324 | -1.458387 |
| H | 2.652016  | 0.425007  | 2.213309  |
| H | 3.186068  | -0.404767 | 4.428562  |
| H | 1.853865  | -1.346077 | 3.742530  |
| H | 3.483329  | -2.029588 | 3.808658  |
| H | 5.005604  | 0.528834  | 2.935573  |
| H | 4.945632  | 0.291605  | 1.184005  |
| H | 5.319756  | -1.066734 | 2.245239  |
| H | -2.516990 | 4.268912  | 0.075614  |
| H | -0.788127 | 4.556560  | -0.101247 |
| H | -1.612600 | 3.432016  | -1.195451 |
| H | -2.607934 | 1.390231  | -1.239439 |
| H | -4.356256 | 0.058612  | 3.204307  |
| H | -2.544401 | 1.707392  | 3.038383  |
| H | -4.179240 | -0.144825 | -2.333355 |
| H | -5.973715 | -1.821727 | -2.169769 |
| H | -6.857682 | -2.497086 | 0.048985  |
| H | -5.947382 | -1.497089 | 2.105469  |

ωB97X energy = -1315.45795987 a.u.

(5S,1'S)-**3a**, Conf. L

|   |           |           |           |
|---|-----------|-----------|-----------|
| C | 1.123973  | -2.677942 | 0.056205  |
| C | 2.068254  | -1.535820 | 0.503925  |
| N | 1.405158  | -0.355480 | -0.133651 |
| C | 0.229775  | -0.707100 | -0.604249 |
| N | -0.061654 | -1.968882 | -0.445498 |
| C | 2.287067  | -1.450109 | 2.033737  |
| C | 0.973243  | -1.357839 | 2.811840  |
| C | 3.179563  | -0.255478 | 2.385963  |
| C | 3.036132  | -2.726473 | 2.441508  |
| C | -1.284581 | -2.631201 | -0.948243 |
| C | 1.952413  | 0.968731  | -0.301420 |
| C | 1.330088  | 2.059257  | 0.326697  |
| C | 1.919741  | 3.310472  | 0.176169  |
| C | 3.079892  | 3.476200  | -0.559200 |
| C | 3.647476  | 2.392626  | -1.204706 |
| C | 3.082902  | 1.124138  | -1.114899 |
| C | 3.685020  | -0.004691 | -1.936605 |
| C | 3.702934  | 0.352498  | -3.425525 |
| C | 5.089118  | -0.373487 | -1.452680 |
| C | 0.036696  | 1.959083  | 1.122454  |
| C | 0.176459  | 2.533639  | 2.533596  |

|   |           |           |           |
|---|-----------|-----------|-----------|
| C | -1.113728 | 2.640396  | 0.374021  |
| C | -1.595799 | -3.869977 | -0.118456 |
| C | -2.437699 | -1.645833 | -0.956107 |
| C | -2.839135 | -1.021724 | 0.195010  |
| C | -3.904900 | -0.090206 | 0.190602  |
| C | -4.570218 | 0.186850  | -1.027879 |
| C | -4.148633 | -0.482144 | -2.203224 |
| C | -3.110286 | -1.368651 | -2.169479 |
| C | -4.316118 | 0.584457  | 1.370982  |
| C | -5.338174 | 1.487092  | 1.333170  |
| C | -6.004484 | 1.763569  | 0.114720  |
| C | -5.631743 | 1.129947  | -1.034401 |
| H | 1.550435  | -3.277772 | -0.750113 |
| H | 0.853892  | -3.337796 | 0.876213  |
| H | 3.048227  | -1.662334 | 0.044908  |
| H | -0.435486 | -0.003107 | -1.086828 |
| H | 0.323559  | -2.219251 | 2.640248  |
| H | 0.414319  | -0.453857 | 2.564122  |
| H | 1.185947  | -1.323028 | 3.882374  |
| H | 2.688830  | 0.700764  | 2.206112  |
| H | 4.111536  | -0.270270 | 1.813894  |
| H | 3.439749  | -0.300018 | 3.445689  |
| H | 2.460775  | -3.634291 | 2.248361  |
| H | 3.989877  | -2.808587 | 1.913451  |
| H | 3.247196  | -2.696032 | 3.512079  |
| H | -1.080652 | -2.941755 | -1.976897 |
| H | 1.462332  | 4.172510  | 0.648253  |
| H | 3.531026  | 4.457700  | -0.647318 |
| H | 4.535071  | 2.537688  | -1.810292 |
| H | 3.046783  | -0.884008 | -1.841103 |
| H | 4.061439  | -0.499156 | -4.007619 |
| H | 2.704561  | 0.614292  | -3.781656 |
| H | 4.367491  | 1.195763  | -3.626325 |
| H | 5.479451  | -1.215645 | -2.027861 |
| H | 5.097832  | -0.650875 | -0.395617 |
| H | 5.776457  | 0.466711  | -1.578885 |
| H | -0.229522 | 0.907585  | 1.234564  |
| H | -0.749652 | 2.376003  | 3.090717  |
| H | 0.989710  | 2.056471  | 3.084946  |
| H | 0.369813  | 3.608152  | 2.509385  |
| H | -2.051119 | 2.510701  | 0.920984  |
| H | -1.249832 | 2.225666  | -0.628423 |
| H | -0.927512 | 3.711687  | 0.265849  |
| H | -2.509664 | -4.321748 | -0.503506 |
| H | -0.800359 | -4.612921 | -0.188354 |
| H | -1.756749 | -3.614282 | 0.930793  |
| H | -2.333191 | -1.221043 | 1.136640  |
| H | -4.657779 | -0.272749 | -3.137955 |
| H | -2.790138 | -1.865322 | -3.079172 |
| H | -3.802401 | 0.370431  | 2.302705  |
| H | -5.645749 | 1.999102  | 2.237624  |
| H | -6.813736 | 2.484458  | 0.101366  |
| H | -6.138782 | 1.339033  | -1.970466 |

ωB97X energy = -1315.45788268 a.u.

(5S,1'S)-**3a**, Conf. M

|   |           |           |           |
|---|-----------|-----------|-----------|
| C | -0.020167 | -1.774431 | 1.112592  |
| C | 1.220835  | -0.868041 | 1.324778  |
| N | 1.420871  | -0.307776 | -0.049320 |
| C | 0.528761  | -0.812420 | -0.873134 |
| N | -0.327266 | -1.622405 | -0.316667 |
| C | 1.085780  | 0.141106  | 2.488319  |
| C | 0.935365  | -0.695944 | 3.766699  |
| C | -0.124339 | 1.064401  | 2.342097  |
| C | 2.359745  | 0.982092  | 2.626455  |
| C | -1.446091 | -2.275303 | -1.003688 |
| C | 2.576501  | 0.430468  | -0.506403 |
| C | 2.427209  | 1.771189  | -0.888892 |
| C | 3.574844  | 2.469390  | -1.251836 |
| C | 4.818026  | 1.862662  | -1.240896 |
| C | 4.929695  | 0.523251  | -0.913441 |
| C | 3.812104  | -0.228346 | -0.564021 |
| C | 3.981854  | -1.720192 | -0.321383 |
| C | 4.568688  | -2.406243 | -1.558493 |
| C | 4.842547  | -2.003566 | 0.911606  |
| C | 1.085234  | 2.479992  | -0.975408 |
| C | 1.047576  | 3.755049  | -0.130762 |
| C | 0.737174  | 2.789054  | -2.434891 |
| C | -1.515139 | -3.740374 | -0.581487 |
| C | -2.757694 | -1.529296 | -0.797966 |
| C | -2.833756 | -0.324064 | -0.160946 |
| C | -4.069791 | 0.356774  | -0.002248 |
| C | -5.247100 | -0.222219 | -0.525847 |
| C | -5.145531 | -1.466067 | -1.201856 |
| C | -3.945937 | -2.097842 | -1.332467 |
| C | -4.154333 | 1.603628  | 0.668084  |
| C | -5.356780 | 2.235724  | 0.808781  |
| C | -6.535121 | 1.654926  | 0.286152  |
| C | -6.481587 | 0.456082  | -0.366011 |
| H | 0.192746  | -2.818364 | 1.335781  |
| H | -0.877753 | -1.460934 | 1.707924  |
| H | 2.090326  | -1.488316 | 1.547897  |
| H | 0.513059  | -0.580071 | -1.931448 |
| H | 1.804070  | -1.341775 | 3.920562  |
| H | 0.041166  | -1.323353 | 3.751779  |
| H | 0.854926  | -0.031285 | 4.628861  |
| H | -0.102368 | 1.622442  | 1.404325  |
| H | -0.123511 | 1.794257  | 3.154090  |
| H | -1.072278 | 0.524442  | 2.402329  |
| H | 3.251946  | 0.351542  | 2.668517  |
| H | 2.485704  | 1.690910  | 1.807964  |
| H | 2.313600  | 1.553912  | 3.555657  |
| H | -1.197934 | -2.235899 | -2.067783 |
| H | 3.492114  | 3.508731  | -1.549013 |
| H | 5.700783  | 2.429823  | -1.512646 |
| H | 5.901767  | 0.044445  | -0.950449 |
| H | 2.999027  | -2.166308 | -0.160823 |
| H | 4.610167  | -3.486066 | -1.400936 |
| H | 3.961173  | -2.212053 | -2.444763 |
| H | 5.584689  | -2.059890 | -1.760868 |
| H | 4.926679  | -3.079747 | 1.075796  |

|   |           |           |           |
|---|-----------|-----------|-----------|
| H | 4.423457  | -1.553934 | 1.814965  |
| H | 5.850991  | -1.603784 | 0.780801  |
| H | 0.311592  | 1.811582  | -0.595328 |
| H | 0.050388  | 4.198893  | -0.169998 |
| H | 1.288666  | 3.556324  | 0.915781  |
| H | 1.756009  | 4.498200  | -0.503395 |
| H | -0.252997 | 3.245285  | -2.498139 |
| H | 0.737419  | 1.886018  | -3.049895 |
| H | 1.457892  | 3.487291  | -2.867484 |
| H | -2.229309 | -4.275986 | -1.203849 |
| H | -0.541389 | -4.215491 | -0.706262 |
| H | -1.833828 | -3.840957 | 0.457538  |
| H | -1.947098 | 0.155099  | 0.239022  |
| H | -6.042873 | -1.910541 | -1.619300 |
| H | -3.899210 | -3.041767 | -1.862879 |
| H | -3.248015 | 2.047410  | 1.068460  |
| H | -5.413721 | 3.188418  | 1.322555  |
| H | -7.482440 | 2.167688  | 0.406195  |
| H | -7.382301 | 0.006428  | -0.770559 |

ωB97X energy = -1315.45711093 a.u.

(5S,1'S)-**3a**, Conf. N

|   |           |           |           |
|---|-----------|-----------|-----------|
| C | 1.103908  | -2.313988 | -1.277072 |
| C | 2.028777  | -1.079219 | -1.162237 |
| N | 1.351162  | -0.303467 | -0.075578 |
| C | 0.170153  | -0.840097 | 0.169224  |
| N | -0.068752 | -1.941200 | -0.479943 |
| C | 3.524230  | -1.415155 | -0.986352 |
| C | 3.924496  | -2.242753 | -2.216406 |
| C | 3.815803  | -2.220353 | 0.279371  |
| C | 4.358546  | -0.129865 | -0.987664 |
| C | -1.294419 | -2.763621 | -0.425414 |
| C | 1.603851  | 1.088927  | 0.230188  |
| C | 2.175173  | 1.430122  | 1.462551  |
| C | 2.461092  | 2.772487  | 1.692118  |
| C | 2.176550  | 3.738270  | 0.742925  |
| C | 1.554313  | 3.382797  | -0.440853 |
| C | 1.234689  | 2.056519  | -0.714953 |
| C | 0.453842  | 1.738582  | -1.982053 |
| C | -0.924315 | 2.406784  | -1.948388 |
| C | 1.227200  | 2.132812  | -3.241731 |
| C | 2.430645  | 0.421168  | 2.568402  |
| C | 3.885916  | 0.429037  | 3.039438  |
| C | 1.480491  | 0.670295  | 3.743817  |
| C | -1.044768 | -4.033169 | 0.375269  |
| C | -2.461537 | -1.909615 | 0.040852  |
| C | -2.967515 | -0.965010 | -0.812991 |
| C | -4.020996 | -0.104983 | -0.423320 |
| C | -4.568598 | -0.237953 | 0.874886  |
| C | -4.039275 | -1.227339 | 1.738828  |
| C | -3.014174 | -2.037034 | 1.337888  |
| C | -4.538062 | 0.891050  | -1.293883 |
| C | -5.551320 | 1.708238  | -0.886364 |
| C | -6.103557 | 1.571515  | 0.410474  |
| C | -5.626497 | 0.623793  | 1.268029  |



|                                                 |           |           |           |   |           |           |           |
|-------------------------------------------------|-----------|-----------|-----------|---|-----------|-----------|-----------|
| H                                               | 0.804955  | -2.521712 | -2.303785 | C | 2.896530  | 0.216847  | -0.222464 |
| H                                               | 1.558398  | -3.210178 | -0.852706 | C | 3.949549  | -0.706844 | -0.279709 |
| H                                               | 1.949765  | -0.480003 | -2.073493 | C | 5.248616  | -0.208417 | -0.282263 |
| H                                               | -0.549309 | -0.377391 | 0.833203  | C | 5.493826  | 1.152833  | -0.281902 |
| H                                               | 3.712122  | -1.704075 | -3.143930 | C | 4.436009  | 2.043962  | -0.301401 |
| H                                               | 3.408317  | -3.205013 | -2.252854 | C | 3.117092  | 1.601262  | -0.271567 |
| H                                               | 4.996479  | -2.446398 | -2.184899 | C | 2.002713  | 2.633642  | -0.336178 |
| H                                               | 3.289742  | -3.177107 | 0.297806  | C | 2.106073  | 3.667196  | 0.787295  |
| H                                               | 3.551557  | -1.671068 | 1.182693  | C | 1.987081  | 3.322826  | -1.704015 |
| H                                               | 4.884617  | -2.439260 | 0.328103  | C | 3.743874  | -2.209643 | -0.389453 |
| H                                               | 4.156335  | 0.471918  | -1.878449 | C | 4.401820  | -2.758401 | -1.658561 |
| H                                               | 4.168294  | 0.490311  | -0.111373 | C | 4.259699  | -2.944626 | 0.849738  |
| H                                               | 5.420623  | -0.384540 | -0.991058 | C | -1.273884 | -0.515733 | -3.216784 |
| H                                               | -1.481955 | -3.039208 | -1.466499 | C | -2.765794 | -0.445137 | -1.180069 |
| H                                               | 2.908846  | 3.067128  | 2.634572  | C | -3.881651 | -1.187981 | -0.922754 |
| H                                               | 2.416037  | 4.777299  | 0.937666  | C | -5.037192 | -0.602397 | -0.340887 |
| H                                               | 1.293121  | 4.152686  | -1.158299 | C | -5.019128 | 0.774167  | -0.017073 |
| H                                               | 0.270351  | 0.664273  | -2.031931 | C | -3.844213 | 1.524948  | -0.287172 |
| H                                               | -1.493678 | 2.133700  | -2.840136 | C | -2.753441 | 0.935814  | -0.851765 |
| H                                               | -1.496500 | 2.092894  | -1.071225 | C | -6.205994 | -1.358480 | -0.070628 |
| H                                               | -0.837598 | 3.495551  | -1.925473 | C | -7.301401 | -0.767071 | 0.491138  |
| H                                               | 0.666466  | 1.846960  | -4.134033 | C | -7.283913 | 0.609576  | 0.812817  |
| H                                               | 2.204690  | 1.645621  | -3.282993 | C | -6.170668 | 1.361023  | 0.565416  |
| H                                               | 1.391157  | 3.212149  | -3.281744 | H | -0.320862 | -2.690908 | 0.215672  |
| H                                               | 2.207397  | -0.572844 | 2.180054  | H | -1.226941 | -1.350958 | 0.934447  |
| H                                               | 4.042553  | -0.356473 | 3.782123  | H | 1.645312  | -1.902224 | 1.209604  |
| H                                               | 4.581470  | 0.258133  | 2.214758  | H | 0.929833  | 0.243867  | -2.069661 |
| H                                               | 4.146314  | 1.381895  | 3.506044  | H | -1.209602 | 0.537601  | 1.871562  |
| H                                               | 1.622906  | -0.092593 | 4.512415  | H | 0.148182  | 1.608651  | 1.509311  |
| H                                               | 0.435713  | 0.643973  | 3.425999  | H | -0.340355 | 1.332965  | 3.176935  |
| H                                               | 1.667754  | 1.646125  | 4.199133  | H | 2.533568  | 0.966146  | 2.272254  |
| H                                               | -1.947187 | -4.644983 | 0.386674  | H | 2.824058  | -0.632883 | 2.964168  |
| H                                               | -0.248044 | -4.621350 | -0.081101 | H | 1.946454  | 0.588193  | 3.889660  |
| H                                               | -0.758779 | -3.808096 | 1.403670  | H | -0.778206 | -1.735862 | 3.026229  |
| H                                               | -2.551640 | -0.855472 | -1.811709 | H | 0.878743  | -2.189387 | 3.454617  |
| H                                               | -4.460145 | -1.334290 | 2.732909  | H | 0.066089  | -0.872668 | 4.306916  |
| H                                               | -2.628431 | -2.783322 | 2.021598  | H | -1.732666 | -2.154639 | -1.920435 |
| H                                               | -4.111245 | 0.991717  | -2.286512 | H | 6.082920  | -0.900409 | -0.307351 |
| H                                               | -5.940032 | 2.467795  | -1.554748 | H | 6.513173  | 1.521203  | -0.288906 |
| H                                               | -6.909215 | 2.228021  | 0.718296  | H | 4.637336  | 3.108534  | -0.339207 |
| H                                               | -6.046939 | 0.516453  | 2.262395  | H | 1.045333  | 2.124576  | -0.220815 |
| $\omega$ B97X energy = -1315.45709326 a.u.      |           |           |           | H | 1.255429  | 4.350877  | 0.744748  |
| (5 <i>S</i> ,1' <i>R</i> )- <b>3b</b> , Conf. A |           |           |           | H | 2.111546  | 3.194839  | 1.772041  |
| C                                               | -0.337252 | -1.610314 | 0.362330  | H | 3.016153  | 4.264006  | 0.695645  |
| C                                               | 0.966810  | -1.074266 | 1.003118  | H | 1.155982  | 4.028918  | -1.761361 |
| N                                               | 1.545212  | -0.284541 | -0.128871 | H | 1.880347  | 2.602225  | -2.518553 |
| C                                               | 0.708861  | -0.274878 | -1.145791 | H | 2.913378  | 3.877824  | -1.871369 |
| N                                               | -0.387586 | -0.948432 | -0.946196 | H | 2.676233  | -2.411674 | -0.487514 |
| C                                               | 0.757340  | -0.319816 | 2.336795  | H | 4.183283  | -3.823399 | -1.761435 |
| C                                               | -0.216955 | 0.851423  | 2.204593  | H | 4.031520  | -2.245767 | -2.548656 |
| C                                               | 2.096529  | 0.180140  | 2.887777  | H | 5.487500  | -2.642646 | -1.627253 |
| C                                               | 0.194926  | -1.345155 | 3.331374  | H | 4.062281  | -4.015238 | 0.765048  |
| C                                               | -1.552427 | -1.080200 | -1.832164 | H | 3.786563  | -2.582168 | 1.765757  |
|                                                 |           |           |           | H | 5.338393  | -2.809681 | 0.960326  |
|                                                 |           |           |           | H | -2.144998 | -0.702379 | -3.843433 |
|                                                 |           |           |           | H | -0.412662 | -1.000716 | -3.679069 |

|   |           |           |           |
|---|-----------|-----------|-----------|
| H | -1.109353 | 0.563648  | -3.192340 |
| H | -3.900749 | -2.247021 | -1.163819 |
| H | -3.828793 | 2.580891  | -0.038840 |
| H | -1.867573 | 1.531360  | -1.050765 |
| H | -6.215936 | -2.414784 | -0.318378 |
| H | -8.191707 | -1.351291 | 0.693352  |
| H | -8.160947 | 1.065459  | 1.257510  |
| H | -6.152244 | 2.417934  | 0.810095  |

ωB97X energy = -1315.46047103 a.u.

(5*S*,1'*R*)-**3b**, Conf. B

|   |           |           |           |
|---|-----------|-----------|-----------|
| C | -0.215967 | -1.735518 | 0.779413  |
| C | 1.002086  | -0.896806 | 1.238985  |
| N | 1.464297  | -0.314920 | -0.059711 |
| C | 0.645274  | -0.666606 | -1.029157 |
| N | -0.343501 | -1.423779 | -0.648857 |
| C | 0.695536  | 0.103729  | 2.377722  |
| C | -0.421770 | 1.084614  | 2.020140  |
| C | 1.959080  | 0.878046  | 2.766226  |
| C | 0.268526  | -0.736877 | 3.589413  |
| C | -1.449672 | -1.951844 | -1.454346 |
| C | 2.738317  | 0.320144  | -0.306478 |
| C | 2.775438  | 1.674962  | -0.667125 |
| C | 4.024720  | 2.262996  | -0.838904 |
| C | 5.190144  | 1.538864  | -0.661076 |
| C | 5.125389  | 0.191655  | -0.353494 |
| C | 3.902524  | -0.452782 | -0.194955 |
| C | 3.891838  | -1.955287 | 0.038547  |
| C | 4.600520  | -2.690393 | -1.102523 |
| C | 4.510998  | -2.324887 | 1.388333  |
| C | 1.532488  | 2.511343  | -0.923395 |
| C | 1.507457  | 3.788345  | -0.081471 |
| C | 1.405875  | 2.843609  | -2.413349 |
| C | -1.253878 | -1.672518 | -2.936988 |
| C | -2.776362 | -1.416560 | -0.943207 |
| C | -2.966076 | -0.081838 | -0.718053 |
| C | -4.213260 | 0.415946  | -0.265762 |
| C | -5.279069 | -0.491148 | -0.054940 |
| C | -5.060810 | -1.869841 | -0.301552 |
| C | -3.845491 | -2.319499 | -0.729321 |
| C | -4.423480 | 1.797472  | -0.015866 |
| C | -5.635582 | 2.247418  | 0.420741  |
| C | -6.701477 | 1.340431  | 0.631348  |
| C | -6.527799 | 0.006833  | 0.400134  |
| H | -0.057675 | -2.807828 | 0.899403  |
| H | -1.136303 | -1.459741 | 1.292310  |
| H | 1.788606  | -1.558869 | 1.602354  |
| H | 0.799570  | -0.356942 | -2.054593 |
| H | -1.360737 | 0.581262  | 1.774925  |
| H | -0.149772 | 1.724679  | 1.179540  |
| H | -0.619813 | 1.736325  | 2.873742  |
| H | 2.290182  | 1.557791  | 1.981278  |
| H | 2.785513  | 0.200259  | 2.998137  |
| H | 1.758429  | 1.474281  | 3.658971  |
| H | -0.656785 | -1.288902 | 3.410642  |

|   |           |           |           |
|---|-----------|-----------|-----------|
| H | 1.046066  | -1.453589 | 3.866978  |
| H | 0.096530  | -0.080260 | 4.444319  |
| H | -1.433626 | -3.033687 | -1.296188 |
| H | 4.085944  | 3.309398  | -1.115657 |
| H | 6.152662  | 2.021480  | -0.784887 |
| H | 6.043642  | -0.376581 | -0.255280 |
| H | 2.858217  | -2.303937 | 0.030581  |
| H | 4.516875  | -3.769569 | -0.957521 |
| H | 4.157731  | -2.440134 | -2.068702 |
| H | 5.663171  | -2.440518 | -1.140567 |
| H | 4.442434  | -3.402065 | 1.553970  |
| H | 4.010910  | -1.820787 | 2.219209  |
| H | 5.567222  | -2.046904 | 1.421095  |
| H | 0.655737  | 1.924593  | -0.648240 |
| H | 0.563260  | 4.315663  | -0.233757 |
| H | 1.606710  | 3.572599  | 0.984666  |
| H | 2.315139  | 4.467037  | -0.364120 |
| H | 0.482964  | 3.397106  | -2.599171 |
| H | 1.391652  | 1.941127  | -3.029589 |
| H | 2.243355  | 3.461077  | -2.747405 |
| H | -2.077878 | -2.130390 | -3.483007 |
| H | -0.321401 | -2.101702 | -3.307454 |
| H | -1.272567 | -0.600940 | -3.148070 |
| H | -2.158400 | 0.627722  | -0.878908 |
| H | -5.874901 | -2.567842 | -0.137319 |
| H | -3.689176 | -3.378749 | -0.905402 |
| H | -3.603906 | 2.489917  | -0.178944 |
| H | -5.788675 | 3.303871  | 0.608469  |
| H | -7.658020 | 1.713224  | 0.979084  |
| H | -7.341552 | -0.692610 | 0.560840  |

ωB97X energy = -1315.45980851 a.u.

(5*S*,1'*R*)-**3b**, Conf. C

|   |           |           |           |
|---|-----------|-----------|-----------|
| C | 0.406249  | -1.255728 | 0.850875  |
| C | -0.959158 | -0.656228 | 1.273737  |
| N | -1.520781 | -0.228562 | -0.046826 |
| C | -0.671020 | -0.521948 | -1.009547 |
| N | 0.413425  | -1.119436 | -0.609514 |
| C | -1.834209 | -1.603454 | 2.124975  |
| C | -1.032748 | -1.918547 | 3.396101  |
| C | -2.170165 | -2.905249 | 1.397883  |
| C | -3.123067 | -0.891913 | 2.547828  |
| C | 1.540557  | -1.533031 | -1.459034 |
| C | -2.606363 | 0.706862  | -0.239107 |
| C | -2.410736 | 2.038388  | 0.153470  |
| C | -3.488698 | 2.910764  | 0.040783  |
| C | -4.697240 | 2.489711  | -0.485268 |
| C | -4.839368 | 1.189718  | -0.936860 |
| C | -3.799864 | 0.270595  | -0.830200 |
| C | -3.992272 | -1.123539 | -1.403380 |
| C | -5.188133 | -1.846477 | -0.780669 |
| C | -4.131999 | -1.061578 | -2.927467 |
| C | -1.073801 | 2.584732  | 0.631535  |
| C | -0.556591 | 3.658422  | -0.330289 |
| C | -1.153902 | 3.120827  | 2.061913  |

|   |           |           |           |
|---|-----------|-----------|-----------|
| C | 1.718802  | -3.041720 | -1.399800 |
| C | 2.760986  | -0.706479 | -1.082896 |
| C | 3.912679  | -1.261517 | -0.605909 |
| C | 5.030678  | -0.454364 | -0.260021 |
| C | 4.942569  | 0.948121  | -0.410917 |
| C | 3.734952  | 1.504746  | -0.910571 |
| C | 2.682754  | 0.704774  | -1.235838 |
| C | 6.232039  | -1.018878 | 0.238059  |
| C | 7.290979  | -0.221087 | 0.567302  |
| C | 7.202598  | 1.181219  | 0.414574  |
| C | 6.057062  | 1.751684  | -0.063100 |
| H | 1.253791  | -0.713916 | 1.271989  |
| H | 0.498660  | -2.307024 | 1.118772  |
| H | -0.800449 | 0.245436  | 1.867720  |
| H | -0.855253 | -0.269133 | -2.047118 |
| H | -0.756693 | -1.003192 | 3.926561  |
| H | -0.119915 | -2.480933 | 3.187415  |
| H | -1.643139 | -2.524603 | 4.068156  |
| H | -1.277296 | -3.455536 | 1.091222  |
| H | -2.780341 | -2.729224 | 0.511792  |
| H | -2.739484 | -3.557502 | 2.063327  |
| H | -2.903450 | 0.041437  | 3.073986  |
| H | -3.767291 | -0.656335 | 1.700701  |
| H | -3.688517 | -1.533085 | 3.227600  |
| H | 1.247538  | -1.260166 | -2.475735 |
| H | -3.372308 | 3.943655  | 0.349492  |
| H | -5.524204 | 3.185670  | -0.566514 |
| H | -5.776912 | 0.881255  | -1.385684 |
| H | -3.100121 | -1.711937 | -1.187205 |
| H | -5.261259 | -2.859953 | -1.181319 |
| H | -5.098393 | -1.918125 | 0.305416  |
| H | -6.124768 | -1.332060 | -1.007392 |
| H | -4.220369 | -2.069438 | -3.338748 |
| H | -3.268040 | -0.579210 | -3.390462 |
| H | -5.024304 | -0.501184 | -3.217184 |
| H | -0.334134 | 1.783012  | 0.615324  |
| H | 0.432018  | 3.998440  | -0.013545 |
| H | -0.474215 | 3.268117  | -1.347322 |
| H | -1.219090 | 4.526789  | -0.352172 |
| H | -0.171907 | 3.466552  | 2.391426  |
| H | -1.498743 | 2.356250  | 2.762683  |
| H | -1.844586 | 3.965032  | 2.125724  |
| H | 2.499729  | -3.349326 | -2.095117 |
| H | 0.789308  | -3.533140 | -1.688004 |
| H | 1.996594  | -3.384627 | -0.401822 |
| H | 4.005178  | -2.334519 | -0.480562 |
| H | 3.664066  | 2.580130  | -1.035466 |
| H | 1.771214  | 1.152221  | -1.621227 |
| H | 6.296975  | -2.095721 | 0.354283  |
| H | 8.205481  | -0.660819 | 0.948215  |
| H | 8.050706  | 1.802203  | 0.679171  |
| H | 5.984007  | 2.827525  | -0.182981 |

ωB97X energy = -1315.45922472 a.u.

(5*S*,1'*R*)-**3b**, Conf. D

|   |           |           |           |
|---|-----------|-----------|-----------|
| C | 1.193740  | -2.680600 | -0.014493 |
| C | 2.195602  | -1.543114 | 0.312000  |
| N | 1.410444  | -0.339782 | -0.109196 |
| C | 0.182201  | -0.692004 | -0.419276 |
| N | -0.050625 | -1.969609 | -0.326285 |
| C | 2.716960  | -1.550457 | 1.769277  |
| C | 3.518406  | -2.849584 | 1.935364  |
| C | 1.590699  | -1.510139 | 2.802948  |
| C | 3.674711  | -0.378247 | 2.006464  |
| C | -1.337790 | -2.645604 | -0.579525 |
| C | 1.895020  | 1.009192  | -0.270115 |
| C | 1.372891  | 2.028151  | 0.542103  |
| C | 1.898028  | 3.307247  | 0.387079  |
| C | 2.900192  | 3.566434  | -0.531075 |
| C | 3.363742  | 2.553768  | -1.351282 |
| C | 2.853629  | 1.262403  | -1.260252 |
| C | 3.320794  | 0.219017  | -2.263258 |
| C | 3.052039  | 0.682260  | -3.697765 |
| C | 4.799336  | -0.127195 | -2.074343 |
| C | 0.247546  | 1.818528  | 1.544010  |
| C | 0.621167  | 2.304392  | 2.945722  |
| C | -1.041607 | 2.491703  | 1.062023  |
| C | -1.364631 | -3.219363 | -1.987588 |
| C | -2.467332 | -1.695512 | -0.229046 |
| C | -3.293861 | -1.147644 | -1.166369 |
| C | -4.309596 | -0.222986 | -0.798695 |
| C | -4.457967 | 0.134717  | 0.560834  |
| C | -3.590482 | -0.453561 | 1.520449  |
| C | -2.630866 | -1.339650 | 1.138396  |
| C | -5.171454 | 0.358909  | -1.762157 |
| C | -6.131922 | 1.253846  | -1.384389 |
| C | -6.280009 | 1.610781  | -0.025132 |
| C | -5.463590 | 1.064527  | 0.924339  |
| H | 1.506207  | -3.268860 | -0.878252 |
| H | 1.027875  | -3.354413 | 0.824485  |
| H | 3.066184  | -1.618534 | -0.338933 |
| H | -0.570334 | 0.023340  | -0.726245 |
| H | 4.331951  | -2.906218 | 1.207007  |
| H | 2.900039  | -3.742935 | 1.825236  |
| H | 3.959538  | -2.879313 | 2.933386  |
| H | 0.894923  | -2.346607 | 2.700935  |
| H | 1.019485  | -0.582553 | 2.747500  |
| H | 2.018374  | -1.568320 | 3.806033  |
| H | 4.474873  | -0.360614 | 1.261393  |
| H | 3.168430  | 0.586898  | 1.981570  |
| H | 4.138788  | -0.484460 | 2.989301  |
| H | -1.362558 | -3.470333 | 0.138332  |
| H | 1.516420  | 4.115836  | 1.000154  |
| H | 3.306822  | 4.566951  | -0.622511 |
| H | 4.121229  | 2.775075  | -2.094703 |
| H | 2.735356  | -0.690612 | -2.121904 |
| H | 3.323590  | -0.107860 | -4.401033 |
| H | 1.997049  | 0.922492  | -3.844173 |
| H | 3.639973  | 1.567791  | -3.949448 |
| H | 5.100855  | -0.901621 | -2.782709 |
| H | 5.007620  | -0.490545 | -1.065026 |

|   |           |           |           |
|---|-----------|-----------|-----------|
| H | 5.428869  | 0.749183  | -2.247300 |
| H | 0.040189  | 0.750905  | 1.622945  |
| H | -0.176639 | 2.057408  | 3.649526  |
| H | 1.542759  | 1.837707  | 3.301195  |
| H | 0.760890  | 3.387194  | 2.970337  |
| H | -1.853640 | 2.298220  | 1.767030  |
| H | -1.352819 | 2.121981  | 0.081057  |
| H | -0.910725 | 3.573593  | 0.981503  |
| H | -2.296452 | -3.760978 | -2.151348 |
| H | -0.539934 | -3.919171 | -2.126621 |
| H | -1.276749 | -2.432410 | -2.738373 |
| H | -3.192901 | -1.402374 | -2.215647 |
| H | -3.709607 | -0.190897 | 2.566327  |
| H | -1.976605 | -1.784877 | 1.882295  |
| H | -5.053834 | 0.083730  | -2.805075 |
| H | -6.786937 | 1.694517  | -2.127052 |
| H | -7.046305 | 2.322187  | 0.260227  |
| H | -5.574552 | 1.333916  | 1.969467  |

$\omega$ B97X energy = -1315.45893267 a.u.

(5*S*,1'*R*)-**3b**, Conf. E

|   |           |           |           |
|---|-----------|-----------|-----------|
| C | 1.218027  | -2.662124 | 0.425576  |
| C | 2.080692  | -1.419801 | 0.760782  |
| N | 1.383709  | -0.367835 | -0.046529 |
| C | 0.241184  | -0.838950 | -0.497259 |
| N | 0.025551  | -2.090518 | -0.210360 |
| C | 2.221035  | -1.128684 | 2.274331  |
| C | 3.007879  | -2.301187 | 2.876479  |
| C | 0.866337  | -1.008971 | 2.974908  |
| C | 3.036409  | 0.147573  | 2.506102  |
| C | -1.217700 | -2.852455 | -0.448677 |
| C | 1.852834  | 0.961362  | -0.351379 |
| C | 3.014573  | 1.099732  | -1.122430 |
| C | 3.499362  | 2.385778  | -1.340223 |
| C | 2.826180  | 3.495214  | -0.862251 |
| C | 1.638505  | 3.335757  | -0.170406 |
| C | 1.124294  | 2.072648  | 0.104982  |
| C | -0.203157 | 1.976754  | 0.844432  |
| C | -0.181210 | 2.726541  | 2.177788  |
| C | -1.354862 | 2.474686  | -0.035881 |
| C | 3.735754  | -0.072762 | -1.768555 |
| C | 3.823188  | 0.107434  | -3.286632 |
| C | 5.127942  | -0.281748 | -1.168538 |
| C | -1.008759 | -3.878693 | -1.551903 |
| C | -2.358392 | -1.875110 | -0.662775 |
| C | -2.930061 | -1.283019 | 0.431521  |
| C | -3.918974 | -0.279308 | 0.296273  |
| C | -4.326603 | 0.109139  | -1.001862 |
| C | -3.740797 | -0.533313 | -2.120856 |
| C | -2.784299 | -1.494855 | -1.959230 |
| C | -4.493115 | 0.365006  | 1.423487  |
| C | -5.423346 | 1.349595  | 1.258860  |
| C | -5.831747 | 1.738112  | -0.039678 |
| C | -5.300276 | 1.132320  | -1.140966 |
| H | 1.717553  | -3.333456 | -0.274091 |

|   |           |           |           |
|---|-----------|-----------|-----------|
| H | 0.927526  | -3.230407 | 1.307617  |
| H | 3.084960  | -1.547429 | 0.358634  |
| H | -0.456061 | -0.232952 | -1.060761 |
| H | 3.985645  | -2.405480 | 2.398523  |
| H | 2.481404  | -3.253549 | 2.785397  |
| H | 3.172765  | -2.119769 | 3.940184  |
| H | 0.264501  | -1.916094 | 2.879676  |
| H | 0.282008  | -0.170668 | 2.592650  |
| H | 1.022515  | -0.835817 | 4.041659  |
| H | 4.000387  | 0.103479  | 1.991573  |
| H | 2.515403  | 1.043709  | 2.169346  |
| H | 3.234728  | 0.261163  | 3.574042  |
| H | -1.403531 | -3.379030 | 0.491189  |
| H | 4.409292  | 2.520469  | -1.914289 |
| H | 3.216948  | 4.489041  | -1.047386 |
| H | 1.099900  | 4.213307  | 0.168792  |
| H | -0.405047 | 0.930588  | 1.075260  |
| H | -1.126136 | 2.572997  | 2.703869  |
| H | 0.627407  | 2.377162  | 2.823861  |
| H | -0.054933 | 3.801213  | 2.030851  |
| H | -2.309577 | 2.345506  | 0.481266  |
| H | -1.411067 | 1.931390  | -0.983448 |
| H | -1.234492 | 3.535256  | -0.269831 |
| H | 3.150196  | -0.977591 | -1.601243 |
| H | 4.266432  | -0.780987 | -3.741468 |
| H | 2.834683  | 0.258814  | -3.724788 |
| H | 4.447105  | 0.963619  | -3.552898 |
| H | 5.609966  | -1.150462 | -1.621901 |
| H | 5.087537  | -0.441364 | -0.088188 |
| H | 5.763155  | 0.588589  | -1.350837 |
| H | -1.930584 | -4.438452 | -1.712132 |
| H | -0.228599 | -4.586810 | -1.270407 |
| H | -0.716825 | -3.403691 | -2.489367 |
| H | -2.610695 | -1.565734 | 1.431673  |
| H | -4.059563 | -0.244579 | -3.116806 |
| H | -2.347939 | -1.963928 | -2.833005 |
| H | -4.176894 | 0.063670  | 2.416755  |
| H | -5.855981 | 1.839644  | 2.123369  |
| H | -6.572890 | 2.520745  | -0.153401 |
| H | -5.611411 | 1.426355  | -2.137841 |

$\omega$ B97X energy = -1315.45839885 a.u.

(5*S*,1'*R*)-**3b**, Conf. F

|   |           |           |           |
|---|-----------|-----------|-----------|
| C | 0.236574  | 1.477437  | -0.960143 |
| C | -1.111383 | 0.787136  | -1.292642 |
| N | -1.450046 | 0.150385  | 0.018577  |
| C | -0.533942 | 0.454968  | 0.913972  |
| N | 0.421930  | 1.219305  | 0.472140  |
| C | -2.174912 | 1.728208  | -1.904356 |
| C | -1.590062 | 2.246022  | -3.226349 |
| C | -2.509495 | 2.911873  | -0.996883 |
| C | -3.451897 | 0.947915  | -2.233035 |
| C | 1.543613  | 1.734622  | 1.277307  |
| C | -2.452770 | -0.865262 | 0.241627  |
| C | -2.279145 | -2.118420 | -0.361941 |

|   |           |           |           |
|---|-----------|-----------|-----------|
| C | -3.294800 | -3.057215 | -0.209997 |
| C | -4.415230 | -2.781943 | 0.553505  |
| C | -4.526986 | -1.564721 | 1.201546  |
| C | -3.552754 | -0.580666 | 1.063590  |
| C | -3.710289 | 0.715734  | 1.840635  |
| C | -5.034229 | 1.418522  | 1.533835  |
| C | -3.571281 | 0.461045  | 3.344858  |
| C | -1.023208 | -2.515243 | -1.121861 |
| C | -0.354423 | -3.728683 | -0.469861 |
| C | -1.313514 | -2.784006 | -2.599925 |
| C | 1.461154  | 3.250633  | 1.395256  |
| C | 2.861432  | 1.213468  | 0.733107  |
| C | 3.425336  | 0.099980  | 1.291369  |
| C | 4.645426  | -0.434109 | 0.805473  |
| C | 5.285695  | 0.201393  | -0.283756 |
| C | 4.686800  | 1.357035  | -0.846859 |
| C | 3.515441  | 1.851309  | -0.352596 |
| C | 5.241643  | -1.586673 | 1.379716  |
| C | 6.414950  | -2.079691 | 0.886082  |
| C | 7.054019  | -1.445409 | -0.205234 |
| C | 6.504502  | -0.333210 | -0.774918 |
| H | 1.070170  | 1.051274  | -1.518472 |
| H | 0.208164  | 2.551013  | -1.139794 |
| H | -0.945699 | -0.012990 | -2.014948 |
| H | -0.570019 | 0.087390  | 1.932376  |
| H | -1.327584 | 1.420391  | -3.893414 |
| H | -0.699917 | 2.861424  | -3.079090 |
| H | -2.332745 | 2.863829  | -3.734540 |
| H | -1.630152 | 3.511035  | -0.748137 |
| H | -2.976094 | 2.590098  | -0.065506 |
| H | -3.215894 | 3.571167  | -1.505571 |
| H | -3.235870 | 0.084425  | -2.868748 |
| H | -3.964307 | 0.589476  | -1.340208 |
| H | -4.143406 | 1.595481  | -2.776288 |
| H | 1.399100  | 1.300991  | 2.268201  |
| H | -3.195641 | -4.028805 | -0.681013 |
| H | -5.193892 | -3.528020 | 0.662358  |
| H | -5.390637 | -1.372789 | 1.828333  |
| H | -2.906728 | 1.394200  | 1.553341  |
| H | -5.074439 | 2.379755  | 2.050764  |
| H | -5.156749 | 1.603722  | 0.464338  |
| H | -5.886604 | 0.824825  | 1.871352  |
| H | -3.636787 | 1.403052  | 3.893441  |
| H | -2.615908 | -0.009870 | 3.588513  |
| H | -4.367370 | -0.195311 | 3.704812  |
| H | -0.302074 | -1.698959 | -1.059551 |
| H | 0.587494  | -3.951443 | -0.975600 |
| H | -0.141148 | -3.542385 | 0.584722  |
| H | -0.987181 | -4.616616 | -0.536213 |
| H | -0.389203 | -3.023281 | -3.129821 |
| H | -1.772444 | -1.920765 | -3.088479 |
| H | -1.995430 | -3.630074 | -2.714741 |
| H | 2.270721  | 3.606412  | 2.032929  |
| H | 0.510133  | 3.540248  | 1.843606  |
| H | 1.552616  | 3.747584  | 0.428561  |
| H | 2.939562  | -0.395427 | 2.127415  |

|   |          |           |           |
|---|----------|-----------|-----------|
| H | 5.178157 | 1.848836  | -1.679668 |
| H | 3.087644 | 2.742805  | -0.797473 |
| H | 4.748914 | -2.069399 | 2.217248  |
| H | 6.864030 | -2.961207 | 1.328843  |
| H | 7.984580 | -1.849378 | -0.586945 |
| H | 6.991850 | 0.157163  | -1.611084 |

ωB97X energy = -1315.45832486 a.u.

(5*S*,1'*R*)-**3b**, Conf. G

|   |           |           |           |
|---|-----------|-----------|-----------|
| C | 1.095082  | 2.630822  | -0.245757 |
| C | 2.192951  | 1.545677  | -0.117513 |
| N | 1.371226  | 0.296901  | -0.081712 |
| C | 0.091316  | 0.604255  | -0.066074 |
| N | -0.162114 | 1.881478  | -0.126030 |
| C | 3.306792  | 1.637362  | -1.184996 |
| C | 3.965619  | 3.011562  | -0.997396 |
| C | 2.777357  | 1.519862  | -2.614060 |
| C | 4.374106  | 0.564875  | -0.943022 |
| C | -1.486255 | 2.503982  | -0.338409 |
| C | 1.847944  | -1.023896 | 0.262074  |
| C | 2.298288  | -1.254657 | 1.569027  |
| C | 2.840230  | -2.503770 | 1.855095  |
| C | 2.885926  | -3.500394 | 0.896469  |
| C | 2.360052  | -3.272539 | -0.362838 |
| C | 1.827507  | -2.034335 | -0.709031 |
| C | 1.212234  | -1.859457 | -2.086988 |
| C | 2.189137  | -2.220672 | -3.207647 |
| C | -0.075224 | -2.681100 | -2.205847 |
| C | 2.167466  | -0.236529 | 2.690975  |
| C | 1.282198  | -0.783348 | 3.814478  |
| C | 3.531143  | 0.197528  | 3.231644  |
| C | -1.564360 | 3.830794  | 0.406544  |
| C | -2.588135 | 1.546530  | 0.057227  |
| C | -3.411942 | 1.015461  | -0.893647 |
| C | -4.463457 | 0.127274  | -0.544501 |
| C | -4.648975 | -0.214417 | 0.815069  |
| C | -3.775795 | 0.344349  | 1.786072  |
| C | -2.779469 | 1.198803  | 1.421514  |
| C | -5.328752 | -0.429543 | -1.520141 |
| C | -6.329380 | -1.283594 | -1.153537 |
| C | -6.516135 | -1.623570 | 0.205891  |
| C | -5.696695 | -1.102448 | 1.166173  |
| H | 1.165459  | 3.379591  | 0.540562  |
| H | 1.115217  | 3.134727  | -1.213326 |
| H | 2.682101  | 1.637507  | 0.854585  |
| H | -0.684247 | -0.147902 | 0.006090  |
| H | 4.364449  | 3.124620  | 0.014332  |
| H | 3.271562  | 3.833956  | -1.185996 |
| H | 4.795578  | 3.115686  | -1.698827 |
| H | 2.055443  | 2.300932  | -2.861471 |
| H | 2.306481  | 0.553815  | -2.795063 |
| H | 3.608392  | 1.616278  | -3.315941 |
| H | 4.752758  | 0.604699  | 0.082183  |
| H | 4.002052  | -0.443333 | -1.127923 |
| H | 5.217295  | 0.736270  | -1.615610 |

|   |           |           |           |
|---|-----------|-----------|-----------|
| H | -1.567306 | 2.698648  | -1.411719 |
| H | 3.214723  | -2.705829 | 2.852411  |
| H | 3.311578  | -4.467225 | 1.139085  |
| H | 2.362194  | -4.072970 | -1.094023 |
| H | 0.938393  | -0.811573 | -2.212662 |
| H | 1.743808  | -1.993337 | -4.178638 |
| H | 3.125250  | -1.663806 | -3.123865 |
| H | 2.430430  | -3.285937 | -3.196272 |
| H | -0.535775 | -2.522168 | -3.183326 |
| H | -0.802325 | -2.404905 | -1.438254 |
| H | 0.131963  | -3.748874 | -2.099771 |
| H | 1.659932  | 0.649006  | 2.305940  |
| H | 1.137665  | -0.019489 | 4.581556  |
| H | 0.301144  | -1.077317 | 3.434786  |
| H | 1.736393  | -1.654824 | 4.291475  |
| H | 3.407251  | 0.959835  | 4.003628  |
| H | 4.167282  | 0.610671  | 2.444898  |
| H | 4.061252  | -0.647569 | 3.677389  |
| H | -2.554611 | 4.259371  | 0.254116  |
| H | -0.829986 | 4.543569  | 0.029989  |
| H | -1.405578 | 3.697322  | 1.477747  |
| H | -3.272678 | 1.270190  | -1.940189 |
| H | -3.917359 | 0.082997  | 2.829405  |
| H | -2.123803 | 1.613096  | 2.180185  |
| H | -5.182115 | -0.166370 | -2.562461 |
| H | -6.987546 | -1.704764 | -1.904667 |
| H | -7.314615 | -2.302536 | 0.481982  |
| H | -5.836522 | -1.359898 | 2.210781  |

ωB97X energy = -1315.45828084 a.u.

(5*S*,1'*R*)-**3b**, Conf. H

|   |           |           |           |
|---|-----------|-----------|-----------|
| C | 0.068231  | -1.931521 | 0.688175  |
| C | -1.073251 | -1.001297 | 1.171732  |
| N | -1.440995 | -0.294242 | -0.094982 |
| C | -0.614296 | -0.652247 | -1.057549 |
| N | 0.251133  | -1.561702 | -0.719089 |
| C | -2.205228 | -1.726596 | 1.932187  |
| C | -1.549992 | -2.391446 | 3.151503  |
| C | -2.906282 | -2.791529 | 1.089080  |
| C | -3.231285 | -0.711175 | 2.444696  |
| C | 1.372235  | -2.032066 | -1.550559 |
| C | -2.204176 | 0.931611  | -0.180042 |
| C | -1.638534 | 2.103384  | 0.342530  |
| C | -2.412638 | 3.259446  | 0.320101  |
| C | -3.677384 | 3.262280  | -0.241690 |
| C | -4.180749 | 2.110063  | -0.819352 |
| C | -3.455917 | 0.922082  | -0.808067 |
| C | -4.020108 | -0.293733 | -1.522188 |
| C | -5.403164 | -0.687001 | -1.000236 |
| C | -4.060691 | -0.052504 | -3.034382 |
| C | -0.214568 | 2.182693  | 0.873176  |
| C | 0.624088  | 3.155514  | 0.039022  |
| C | -0.179067 | 2.559699  | 2.355341  |
| C | 1.330653  | -3.544867 | -1.691398 |
| C | 2.666940  | -1.458009 | -0.988944 |

|   |           |           |           |
|---|-----------|-----------|-----------|
| C | 2.956008  | -0.139603 | -1.217673 |
| C | 4.112927  | 0.469818  | -0.676105 |
| C | 4.990182  | -0.309820 | 0.114344  |
| C | 4.680584  | -1.675191 | 0.329734  |
| C | 3.554018  | -2.233681 | -0.203718 |
| C | 4.414270  | 1.839824  | -0.897626 |
| C | 5.534355  | 2.399106  | -0.355294 |
| C | 6.412518  | 1.619037  | 0.435196  |
| C | 6.148935  | 0.299834  | 0.662967  |
| H | 0.998050  | -1.772831 | 1.235020  |
| H | -0.201298 | -2.985150 | 0.753501  |
| H | -0.671732 | -0.249584 | 1.855138  |
| H | -0.645995 | -0.204714 | -2.043849 |
| H | -1.023303 | -1.657575 | 3.767570  |
| H | -0.840844 | -3.172826 | 2.869134  |
| H | -2.320255 | -2.856508 | 3.769467  |
| H | -2.215802 | -3.548442 | 0.709854  |
| H | -3.431553 | -2.355789 | 0.239074  |
| H | -3.646788 | -3.308619 | 1.702883  |
| H | -2.752437 | 0.061593  | 3.052672  |
| H | -3.769605 | -0.218039 | 1.634964  |
| H | -3.966305 | -1.220585 | 3.071636  |
| H | 1.206288  | -1.585765 | -2.532670 |
| H | -2.009228 | 4.178355  | 0.730822  |
| H | -4.263302 | 4.174144  | -0.251458 |
| H | -5.154728 | 2.133969  | -1.295099 |
| H | -3.347282 | -1.134115 | -1.349765 |
| H | -5.741311 | -1.601727 | -1.492008 |
| H | -5.394238 | -0.865926 | 0.077294  |
| H | -6.141349 | 0.091709  | -1.205348 |
| H | -4.420017 | -0.946704 | -3.548304 |
| H | -3.071223 | 0.192415  | -3.427908 |
| H | -4.734261 | 0.771731  | -3.281993 |
| H | 0.260723  | 1.206290  | 0.765888  |
| H | 1.662060  | 3.141000  | 0.381126  |
| H | 0.610383  | 2.882746  | -1.018853 |
| H | 0.254398  | 4.179525  | 0.129689  |
| H | 0.849998  | 2.562068  | 2.720525  |
| H | -0.755881 | 1.859572  | 2.965003  |
| H | -0.593770 | 3.557890  | 2.515060  |
| H | 2.155076  | -3.875941 | -2.323176 |
| H | 0.392633  | -3.848536 | -2.156435 |
| H | 1.416726  | -4.051772 | -0.729304 |
| H | 2.291224  | 0.469337  | -1.825739 |
| H | 5.353683  | -2.276858 | 0.931227  |
| H | 3.345291  | -3.281191 | -0.022448 |
| H | 3.738506  | 2.433430  | -1.505054 |
| H | 5.757441  | 3.445826  | -0.526683 |
| H | 7.298248  | 2.078038  | 0.859016  |
| H | 6.819135  | -0.301469 | 1.268256  |

ωB97X energy = -1315.45802171 a.u.

(5*S*,1'*R*)-**3b**, Conf. I

|   |           |           |           |
|---|-----------|-----------|-----------|
| C | -0.013949 | -1.683430 | -1.259617 |
| C | 1.166294  | -0.690677 | -1.412641 |

|   |           |           |           |
|---|-----------|-----------|-----------|
| N | 1.408240  | -0.288854 | 0.009755  |
| C | 0.499192  | -0.838152 | 0.786480  |
| N | -0.334462 | -1.628754 | 0.172657  |
| C | 2.367438  | -1.255153 | -2.203721 |
| C | 1.836079  | -1.600359 | -3.602510 |
| C | 2.965863  | -2.507308 | -1.563789 |
| C | 3.452221  | -0.184945 | -2.363919 |
| C | -1.449110 | -2.337058 | 0.808826  |
| C | 2.216042  | 0.828888  | 0.447192  |
| C | 1.789297  | 2.124745  | 0.123330  |
| C | 2.616772  | 3.185617  | 0.477539  |
| C | 3.797461  | 2.972331  | 1.166703  |
| C | 4.157308  | 1.689999  | 1.540385  |
| C | 3.376564  | 0.590663  | 1.195544  |
| C | 3.795254  | -0.785134 | 1.685581  |
| C | 5.204910  | -1.158871 | 1.221930  |
| C | 3.694362  | -0.866016 | 3.212047  |
| C | 0.455306  | 2.428357  | -0.541901 |
| C | -0.421205 | 3.294212  | 0.367039  |
| C | 0.637824  | 3.081101  | -1.913344 |
| C | -1.552529 | -3.749911 | 0.241913  |
| C | -2.751938 | -1.556904 | 0.696524  |
| C | -2.844788 | -0.342909 | 0.079371  |
| C | -4.075673 | 0.361092  | 0.004618  |
| C | -5.229331 | -0.205613 | 0.590727  |
| C | -5.110012 | -1.461930 | 1.241292  |
| C | -3.915830 | -2.114744 | 1.292188  |
| C | -4.177818 | 1.619179  | -0.641556 |
| C | -5.374599 | 2.274587  | -0.700264 |
| C | -6.529422 | 1.706131  | -0.115514 |
| C | -6.458419 | 0.496620  | 0.515122  |
| H | -0.881929 | -1.397329 | -1.853305 |
| H | 0.267767  | -2.700856 | -1.526544 |
| H | 0.830911  | 0.201154  | -1.945934 |
| H | 0.436174  | -0.631635 | 1.848126  |
| H | 1.390329  | -0.725169 | -4.083005 |
| H | 1.088268  | -2.396315 | -3.579975 |
| H | 2.660169  | -1.944155 | -4.230312 |
| H | 2.241813  | -3.320135 | -1.473656 |
| H | 3.372759  | -2.304128 | -0.573303 |
| H | 3.785102  | -2.873702 | -2.185933 |
| H | 3.045634  | 0.728631  | -2.806894 |
| H | 3.922107  | 0.079075  | -1.416345 |
| H | 4.233200  | -0.557629 | -3.030121 |
| H | -1.186774 | -2.410110 | 1.867409  |
| H | 2.322179  | 4.198566  | 0.226688  |
| H | 4.428134  | 3.812078  | 1.434735  |
| H | 5.064720  | 1.537523  | 2.113809  |
| H | 3.103811  | -1.523436 | 1.278222  |
| H | 5.439140  | -2.181463 | 1.525705  |
| H | 5.306547  | -1.096429 | 0.136282  |
| H | 5.954494  | -0.500131 | 1.666364  |
| H | 3.942518  | -1.873749 | 3.552177  |
| H | 2.688618  | -0.626081 | 3.564173  |
| H | 4.390037  | -0.169975 | 3.687194  |
| H | -0.087051 | 1.492916  | -0.688743 |

|   |           |           |           |
|---|-----------|-----------|-----------|
| H | -1.398506 | 3.452381  | -0.095463 |
| H | -0.576010 | 2.816888  | 1.337180  |
| H | 0.028911  | 4.274545  | 0.537910  |
| H | -0.332258 | 3.237287  | -2.389986 |
| H | 1.248611  | 2.463713  | -2.576845 |
| H | 1.126976  | 4.053633  | -1.821051 |
| H | -2.295913 | -4.318434 | 0.797752  |
| H | -0.596233 | -4.266994 | 0.331860  |
| H | -1.856606 | -3.735300 | -0.806175 |
| H | -1.976466 | 0.125860  | -0.370275 |
| H | -5.988949 | -1.897321 | 1.704879  |
| H | -3.851485 | -3.067661 | 1.805558  |
| H | -3.289030 | 2.051802  | -1.091265 |
| H | -5.445138 | 3.235518  | -1.196678 |
| H | -7.472859 | 2.236791  | -0.170851 |
| H | -7.341555 | 0.056579  | 0.966303  |

$\omega$ B97X energy = -1315.45711003 a.u.

(5S,1'S)-4a, Conf. A

|   |           |           |           |
|---|-----------|-----------|-----------|
| C | 0.029801  | -1.092973 | 1.119258  |
| N | 0.370736  | -0.223322 | -0.048493 |
| C | -0.673861 | -0.109438 | -0.841283 |
| N | -1.743249 | -0.729677 | -0.432778 |
| C | -1.439168 | -1.475926 | 0.798439  |
| C | 0.244348  | -0.492549 | 2.528087  |
| C | 1.691073  | 0.219041  | -0.431988 |
| C | -3.032557 | -0.744124 | -1.152701 |
| C | 2.627572  | -0.740968 | -0.838518 |
| C | 3.919366  | -0.306909 | -1.119837 |
| C | 4.254838  | 1.033420  | -1.051472 |
| C | 3.291682  | 1.970356  | -0.722124 |
| C | 1.991388  | 1.588807  | -0.406150 |
| C | -0.166603 | -1.582151 | 3.528714  |
| C | -0.590302 | 0.763715  | 2.774909  |
| C | 1.726617  | -0.178770 | 2.757585  |
| C | 0.967226  | 2.668534  | -0.098242 |
| C | 2.288300  | -2.209528 | -1.039977 |
| C | 2.550783  | -2.632073 | -2.488328 |
| C | 3.052025  | -3.109592 | -0.066523 |
| C | 1.417053  | 3.587111  | 1.039165  |
| C | 0.644459  | 3.481205  | -1.355903 |
| C | -3.993438 | 0.384465  | -0.686303 |
| C | -3.606678 | -2.153979 | -1.108335 |
| C | -3.323679 | 1.745704  | -0.897686 |
| C | -5.251715 | 0.324677  | -1.561235 |
| C | -4.399319 | 0.252121  | 0.783256  |
| H | 0.659951  | -1.981526 | 1.059747  |
| H | -0.636035 | 0.445196  | -1.771311 |
| H | -1.552075 | -2.543877 | 0.615880  |
| H | -2.126980 | -1.188377 | 1.590379  |
| H | -2.774833 | -0.521434 | -2.192114 |
| H | 4.670048  | -1.029434 | -1.419949 |
| H | 5.266016  | 1.351627  | -1.277476 |
| H | 3.554521  | 3.022055  | -0.708476 |

|   |           |           |           |
|---|-----------|-----------|-----------|
| H | 0.413968  | -2.496452 | 3.378894  |
| H | -1.226771 | -1.835339 | 3.457076  |
| H | 0.017300  | -1.230564 | 4.545591  |
| H | -1.662684 | 0.579071  | 2.680072  |
| H | -0.415779 | 1.122053  | 3.791532  |
| H | -0.323036 | 1.572039  | 2.093776  |
| H | 2.354452  | -1.050685 | 2.553940  |
| H | 1.879664  | 0.103620  | 3.801397  |
| H | 2.080780  | 0.644055  | 2.136119  |
| H | 0.041385  | 2.187946  | 0.219361  |
| H | 1.220116  | -2.349102 | -0.867766 |
| H | 3.613215  | -2.571083 | -2.734518 |
| H | 2.232602  | -3.665887 | -2.638650 |
| H | 2.002847  | -1.999531 | -3.189686 |
| H | 2.769979  | -4.153894 | -0.215692 |
| H | 2.850417  | -2.848716 | 0.975398  |
| H | 4.129919  | -3.027484 | -0.225605 |
| H | 0.624604  | 4.299332  | 1.279045  |
| H | 1.652003  | 3.023830  | 1.945185  |
| H | 2.304164  | 4.160181  | 0.760489  |
| H | -0.130424 | 4.219665  | -1.138684 |
| H | 0.289253  | 2.843186  | -2.168849 |
| H | 1.528589  | 4.014346  | -1.714049 |
| H | -2.863249 | -2.875533 | -1.449728 |
| H | -4.465536 | -2.225337 | -1.772727 |
| H | -3.929299 | -2.438627 | -0.105488 |
| H | -4.018536 | 2.544877  | -0.632198 |
| H | -2.437889 | 1.870638  | -0.268522 |
| H | -3.033170 | 1.891692  | -1.942382 |
| H | -5.870463 | 1.204019  | -1.371525 |
| H | -5.856882 | -0.557206 | -1.344553 |
| H | -4.998845 | 0.315497  | -2.625303 |
| H | -5.160266 | 0.999556  | 1.018267  |
| H | -4.822551 | -0.728707 | 1.009323  |
| H | -3.558176 | 0.434245  | 1.455828  |

ωB97X energy = -1088.02385025 a.u.

(5S,1'S)-4a, Conf. B

|   |           |           |           |
|---|-----------|-----------|-----------|
| C | -0.020544 | -0.461155 | 1.554349  |
| N | -0.310065 | -0.202484 | 0.108641  |
| C | 0.805674  | -0.301635 | -0.587525 |
| N | 1.846361  | -0.673132 | 0.100941  |
| C | 1.444323  | -0.952381 | 1.485310  |
| C | -0.968903 | -1.403907 | 2.328173  |
| C | -1.480828 | 0.460214  | -0.421841 |
| C | 3.193161  | -0.973122 | -0.422948 |
| C | -1.670493 | 1.819875  | -0.136872 |
| C | -2.840807 | 2.419683  | -0.591161 |
| C | -3.763846 | 1.711536  | -1.340122 |
| C | -3.516817 | 0.391501  | -1.671662 |
| C | -2.372290 | -0.263016 | -1.225890 |
| C | -0.392944 | -1.514084 | 3.747689  |
| C | -1.064551 | -2.800312 | 1.714537  |
| C | -2.369673 | -0.791326 | 2.431581  |
| C | -2.125029 | -1.692527 | -1.676327 |

|   |           |           |           |
|---|-----------|-----------|-----------|
| C | -0.640864 | 2.678711  | 0.581158  |
| C | -0.142281 | 3.799248  | -0.335863 |
| C | -1.183484 | 3.246125  | 1.893883  |
| C | -3.300285 | -2.613580 | -1.341992 |
| C | -1.817159 | -1.734708 | -3.176297 |
| C | 4.081799  | 0.298217  | -0.497971 |
| C | 3.083693  | -1.772234 | -1.716610 |
| C | 3.544423  | 1.321104  | -1.500664 |
| C | 4.162689  | 0.951808  | 0.885024  |
| C | 5.492936  | -0.129978 | -0.916006 |
| H | -0.055195 | 0.505220  | 2.064228  |
| H | 0.839295  | -0.082980 | -1.647337 |
| H | 2.091918  | -0.427779 | 2.184480  |
| H | 1.535251  | -2.025552 | 1.661531  |
| H | 3.633174  | -1.624024 | 0.337538  |
| H | -3.021576 | 3.466509  | -0.373883 |
| H | -4.667802 | 2.197878  | -1.688152 |
| H | -4.225169 | -0.143128 | -2.294278 |
| H | -0.290388 | -0.529875 | 4.212701  |
| H | 0.583924  | -2.003184 | 3.760839  |
| H | -1.065112 | -2.109690 | 4.368161  |
| H | -1.701084 | -3.426396 | 2.343427  |
| H | -1.508457 | -2.776884 | 0.720259  |
| H | -0.094653 | -3.296569 | 1.642032  |
| H | -2.331923 | 0.212642  | 2.863411  |
| H | -2.988889 | -1.410369 | 3.084425  |
| H | -2.869652 | -0.726632 | 1.464407  |
| H | -1.244770 | -2.071202 | -1.155808 |
| H | 0.230851  | 2.066723  | 0.817056  |
| H | -0.944826 | 4.497089  | -0.585531 |
| H | 0.650435  | 4.363466  | 0.160322  |
| H | 0.257875  | 3.395608  | -1.268944 |
| H | -0.409669 | 3.823292  | 2.404239  |
| H | -1.518480 | 2.455015  | 2.569124  |
| H | -2.031837 | 3.910250  | 1.712445  |
| H | -3.046927 | -3.647937 | -1.584557 |
| H | -3.562043 | -2.567321 | -0.282442 |
| H | -4.189542 | -2.347354 | -1.917680 |
| H | -1.596340 | -2.758177 | -3.487151 |
| H | -0.958559 | -1.108373 | -3.429692 |
| H | -2.671282 | -1.381572 | -3.759575 |
| H | 2.412471  | -2.620685 | -1.575563 |
| H | 4.059979  | -2.162371 | -1.998606 |
| H | 2.711997  | -1.172359 | -2.549429 |
| H | 4.222654  | 2.175967  | -1.545168 |
| H | 3.468848  | 0.911848  | -2.510242 |
| H | 2.564939  | 1.709121  | -1.206348 |
| H | 4.861167  | 1.790709  | 0.857591  |
| H | 4.520124  | 0.245245  | 1.639431  |
| H | 3.195779  | 1.346275  | 1.207523  |
| H | 6.172092  | 0.721908  | -0.842883 |
| H | 5.875693  | -0.920659 | -0.264510 |
| H | 5.524241  | -0.488739 | -1.946180 |

ωB97X energy = -1088.02352133 a.u.



(5*S*,1'*R*)-**4b**, Conf. A

|   |           |           |           |
|---|-----------|-----------|-----------|
| C | 0.123818  | -1.029564 | 1.307898  |
| N | 0.337361  | -0.243367 | 0.053044  |
| C | -0.759792 | -0.253466 | -0.675593 |
| N | -1.764718 | -0.882647 | -0.138484 |
| C | -1.344584 | -1.496115 | 1.128820  |
| C | 0.411533  | -0.311045 | 2.645872  |
| C | 1.602963  | 0.221617  | -0.464795 |
| C | -3.095708 | -1.093111 | -0.740994 |
| C | 2.551585  | -0.728162 | -0.868460 |
| C | 3.793799  | -0.263883 | -1.289455 |
| C | 4.066722  | 1.090664  | -1.356458 |
| C | 3.087926  | 2.009505  | -1.022684 |
| C | 1.836834  | 1.600164  | -0.571048 |
| C | -0.483175 | 0.907589  | 2.872323  |
| C | 1.883640  | 0.107127  | 2.724449  |
| C | 0.157398  | -1.342779 | 3.753886  |
| C | 0.792468  | 2.660286  | -0.259446 |
| C | 2.273270  | -2.222321 | -0.918591 |
| C | 2.456074  | -2.762698 | -2.339745 |
| C | 3.145370  | -2.996666 | 0.072002  |
| C | 1.281809  | 3.658438  | 0.791997  |
| C | 0.364009  | 3.390063  | -1.536288 |
| C | -4.036456 | 0.125781  | -0.537680 |
| C | -2.939412 | -1.567676 | -2.181934 |
| C | -5.410733 | -0.232571 | -1.114459 |
| C | -4.193677 | 0.406151  | 0.959563  |
| C | -3.515267 | 1.389664  | -1.225588 |
| H | 0.790284  | -1.892451 | 1.267631  |
| H | -0.801465 | 0.211597  | -1.652444 |
| H | -1.429732 | -2.579799 | 1.046127  |
| H | -1.993984 | -1.158310 | 1.934756  |
| H | -3.518150 | -1.918459 | -0.162057 |
| H | 4.553137  | -0.976311 | -1.591817 |
| H | 5.039081  | 1.432382  | -1.692069 |
| H | 3.298904  | 3.068964  | -1.114366 |
| H | -0.205244 | 1.392909  | 3.810210  |
| H | -1.539136 | 0.640134  | 2.953618  |
| H | -0.378371 | 1.647735  | 2.077726  |
| H | 2.130931  | 0.901782  | 2.020647  |
| H | 2.101915  | 0.474238  | 3.729546  |
| H | 2.549078  | -0.737943 | 2.527097  |
| H | -0.880072 | -1.684159 | 3.776845  |
| H | 0.375781  | -0.894850 | 4.725159  |
| H | 0.802585  | -2.217222 | 3.634029  |
| H | -0.094061 | 2.169717  | 0.144844  |
| H | 1.227677  | -2.393612 | -0.658805 |
| H | 2.179467  | -3.818535 | -2.376025 |
| H | 1.830489  | -2.220005 | -3.051491 |
| H | 3.494547  | -2.678656 | -2.667801 |
| H | 2.904216  | -4.061123 | 0.038049  |
| H | 3.003840  | -2.648804 | 1.098325  |
| H | 4.204564  | -2.884131 | -0.171933 |
| H | 0.484368  | 4.363023  | 1.037849  |
| H | 1.587799  | 3.158624  | 1.713655  |

|   |           |           |           |
|---|-----------|-----------|-----------|
| H | 2.133007  | 4.235424  | 0.423888  |
| H | -0.418658 | 4.117214  | -1.309116 |
| H | -0.022420 | 2.697209  | -2.287812 |
| H | 1.205098  | 3.927786  | -1.980588 |
| H | -3.893687 | -1.925509 | -2.564342 |
| H | -2.229644 | -2.394806 | -2.226606 |
| H | -2.590173 | -0.776753 | -2.848029 |
| H | -6.131806 | 0.544877  | -0.854063 |
| H | -5.388825 | -0.312032 | -2.202600 |
| H | -5.777582 | -1.179346 | -0.707823 |
| H | -4.922077 | 1.204997  | 1.113546  |
| H | -3.254614 | 0.735791  | 1.410990  |
| H | -4.548789 | -0.477966 | 1.496475  |
| H | -4.253113 | 2.187891  | -1.120873 |
| H | -2.590702 | 1.755950  | -0.769344 |
| H | -3.345439 | 1.242674  | -2.294482 |

ωB97X energy = -1088.02377625 a.u.

(5*S*,1'*R*)-**4b**, Conf. B

|   |           |           |           |
|---|-----------|-----------|-----------|
| C | 0.059739  | -0.782955 | 1.282919  |
| N | -0.351169 | -0.240941 | -0.049722 |
| C | 0.709748  | -0.159394 | -0.829726 |
| N | 1.803512  | -0.646764 | -0.319797 |
| C | 1.508362  | -1.239273 | 0.993765  |
| C | -0.828441 | -1.867939 | 1.930451  |
| C | -1.540197 | 0.543320  | -0.304144 |
| C | 3.105544  | -0.709618 | -1.013146 |
| C | -1.633995 | 1.820453  | 0.267778  |
| C | -2.821370 | 2.523379  | 0.089200  |
| C | -3.855316 | 2.000603  | -0.667349 |
| C | -3.706714 | 0.771703  | -1.285143 |
| C | -2.548498 | 0.017769  | -1.122578 |
| C | -0.965918 | -3.126636 | 1.073359  |
| C | -2.217973 | -1.304237 | 2.246459  |
| C | -0.151112 | -2.233382 | 3.259303  |
| C | -2.418134 | -1.297572 | -1.870464 |
| C | -0.490911 | 2.492040  | 1.014674  |
| C | -0.065096 | 3.780402  | 0.304399  |
| C | -0.843641 | 2.766215  | 2.477813  |
| C | -3.566162 | -2.258157 | -1.553223 |
| C | -2.328239 | -1.050790 | -3.379763 |
| C | 4.001386  | 0.514137  | -0.674491 |
| C | 3.734684  | -2.075181 | -0.770944 |
| C | 5.322493  | 0.364119  | -1.437618 |
| C | 3.310986  | 1.795371  | -1.152467 |
| C | 4.293882  | 0.637274  | 0.822774  |
| H | 0.076092  | 0.061984  | 1.976665  |
| H | 0.670350  | 0.292829  | -1.813450 |
| H | 2.211262  | -0.889232 | 1.745338  |
| H | 1.589229  | -2.323891 | 0.917724  |
| H | 2.865612  | -0.636129 | -2.077556 |
| H | -2.930824 | 3.505843  | 0.534601  |
| H | -4.772408 | 2.563980  | -0.795354 |
| H | -4.506157 | 0.389352  | -1.909720 |
| H | -1.609472 | -3.842724 | 1.588921  |

|   |           |           |           |
|---|-----------|-----------|-----------|
| H | -0.008822 | -3.622429 | 0.899066  |
| H | -1.419419 | -2.914868 | 0.105462  |
| H | -2.795873 | -1.090817 | 1.346824  |
| H | -2.778811 | -2.031719 | 2.837217  |
| H | -2.149280 | -0.382370 | 2.830899  |
| H | 0.832426  | -2.685364 | 3.110790  |
| H | -0.767245 | -2.957646 | 3.795449  |
| H | -0.032849 | -1.354670 | 3.899213  |
| H | -1.486089 | -1.773737 | -1.564732 |
| H | 0.379607  | 1.832980  | 1.001066  |
| H | 0.811706  | 4.206924  | 0.796879  |
| H | 0.188397  | 3.590303  | -0.741244 |
| H | -0.859731 | 4.529435  | 0.328128  |
| H | 0.008562  | 3.213201  | 2.993816  |
| H | -1.119305 | 1.850378  | 3.006502  |
| H | -1.683726 | 3.460596  | 2.553903  |
| H | -3.393093 | -3.221367 | -2.038285 |
| H | -3.666941 | -2.432244 | -0.479717 |
| H | -4.518767 | -1.869303 | -1.920354 |
| H | -2.185832 | -1.996651 | -3.906919 |
| H | -1.495587 | -0.390431 | -3.632279 |
| H | -3.245881 | -0.591116 | -3.755518 |
| H | 4.601164  | -2.203330 | -1.416576 |
| H | 3.023563  | -2.866635 | -1.012052 |
| H | 4.059978  | -2.204923 | 0.262828  |
| H | 5.901056  | 1.285925  | -1.350336 |
| H | 5.932939  | -0.448401 | -1.039996 |
| H | 5.149793  | 0.176102  | -2.501144 |
| H | 3.963042  | 2.654310  | -0.981458 |
| H | 2.380352  | 1.989883  | -0.611907 |
| H | 3.087578  | 1.753591  | -2.222377 |
| H | 5.016173  | 1.440219  | 0.986017  |
| H | 3.396534  | 0.893650  | 1.391778  |
| H | 4.723650  | -0.277464 | 1.237486  |

ωB97X energy = -1088.02361193 a.u.

(5S,1'R)-**4b**, Conf. C

|   |           |           |           |
|---|-----------|-----------|-----------|
| C | 0.098903  | -0.152270 | 1.455259  |
| N | -0.365848 | -0.066127 | 0.037097  |
| C | 0.662994  | -0.173411 | -0.778230 |
| N | 1.816997  | -0.298221 | -0.187990 |
| C | 1.635941  | -0.205251 | 1.267779  |
| C | -0.485329 | -1.303436 | 2.306525  |
| C | -1.678947 | 0.342378  | -0.404667 |
| C | 3.083083  | -0.590751 | -0.886991 |
| C | -2.087391 | 1.658390  | -0.147203 |
| C | -3.385765 | 2.013869  | -0.499256 |
| C | -4.228420 | 1.115297  | -1.128682 |
| C | -3.775307 | -0.154301 | -1.440094 |
| C | -2.495089 | -0.570612 | -1.087772 |
| C | -0.158377 | -2.683702 | 1.736323  |
| C | -2.002440 | -1.144016 | 2.447159  |
| C | 0.131578  | -1.167892 | 3.705828  |
| C | -2.038906 | -1.960165 | -1.501075 |
| C | -1.171411 | 2.719760  | 0.441888  |

|   |           |           |           |
|---|-----------|-----------|-----------|
| C | -1.007438 | 3.892906  | -0.528343 |
| C | -1.666746 | 3.205201  | 1.805846  |
| C | -2.976386 | -3.056580 | -0.991606 |
| C | -1.887527 | -2.042616 | -3.023027 |
| C | 4.137030  | 0.542455  | -0.749939 |
| C | 3.564328  | -1.980143 | -0.484933 |
| C | 5.149199  | 0.364959  | -1.889681 |
| C | 3.458892  | 1.904277  | -0.920771 |
| C | 4.896215  | 0.500672  | 0.580388  |
| H | -0.176923 | 0.778290  | 1.951868  |
| H | 0.554714  | -0.151548 | -1.856396 |
| H | 2.117418  | 0.698094  | 1.641074  |
| H | 2.089025  | -1.066521 | 1.754537  |
| H | 2.799524  | -0.619826 | -1.942455 |
| H | -3.735988 | 3.019900  | -0.296738 |
| H | -5.235463 | 1.412651  | -1.397515 |
| H | -4.429694 | -0.838492 | -1.968338 |
| H | -0.549351 | -3.454570 | 2.403654  |
| H | 0.917016  | -2.854435 | 1.642497  |
| H | -0.613708 | -2.838382 | 0.757430  |
| H | -2.525523 | -1.281947 | 1.501164  |
| H | -2.382707 | -1.889135 | 3.149358  |
| H | -2.262308 | -0.155507 | 2.836682  |
| H | 1.213447  | -1.317161 | 3.703541  |
| H | -0.299512 | -1.921684 | 4.367285  |
| H | -0.077187 | -0.184825 | 4.136447  |
| H | -1.055413 | -2.145764 | -1.069090 |
| H | -0.176881 | 2.291312  | 0.574704  |
| H | -0.292650 | 4.613800  | -0.125509 |
| H | -0.639971 | 3.553173  | -1.499025 |
| H | -1.954285 | 4.413945  | -0.687171 |
| H | -0.968215 | 3.932424  | 2.224912  |
| H | -1.769922 | 2.382659  | 2.518265  |
| H | -2.641834 | 3.689912  | 1.716136  |
| H | -2.572095 | -4.039038 | -1.244763 |
| H | -3.101261 | -3.011520 | 0.092504  |
| H | -3.965609 | -2.977283 | -1.447746 |
| H | -1.504572 | -3.023655 | -3.312091 |
| H | -1.198728 | -1.283010 | -3.400150 |
| H | -2.849909 | -1.895761 | -3.519438 |
| H | 4.465457  | -2.242922 | -1.037969 |
| H | 2.798777  | -2.722939 | -0.714044 |
| H | 3.797689  | -2.042150 | 0.578973  |
| H | 5.900832  | 1.155509  | -1.840355 |
| H | 5.672591  | -0.591066 | -1.827581 |
| H | 4.660326  | 0.426331  | -2.865524 |
| H | 4.215321  | 2.690689  | -0.960167 |
| H | 2.784795  | 2.139835  | -0.093669 |
| H | 2.884675  | 1.947646  | -1.850740 |
| H | 5.611549  | 1.325525  | 0.612510  |
| H | 4.242472  | 0.605159  | 1.448173  |
| H | 5.459927  | -0.427388 | 0.692650  |

ωB97X energy = -1088.02309249 a.u.

(5R,1'R)-**5a**, Conf. A

|   |           |           |           |
|---|-----------|-----------|-----------|
| C | 0.884466  | -3.647315 | 0.729245  |
| C | -0.161922 | -4.529906 | 0.492941  |
| C | -0.425559 | -4.967339 | -0.796861 |
| C | 0.366538  | -4.522833 | -1.848079 |
| C | 1.412910  | -3.643888 | -1.607989 |
| C | 1.682971  | -3.193633 | -0.316760 |
| C | 2.808612  | -2.221369 | -0.064410 |
| C | 2.505805  | -0.819786 | -0.605136 |
| N | 1.273373  | -0.294811 | -0.006121 |
| C | 0.147231  | -0.081354 | -0.625876 |
| N | -0.794318 | 0.447115  | 0.124974  |
| C | -2.164011 | 0.589083  | -0.309834 |
| C | -3.126934 | -0.279041 | 0.223794  |
| C | -2.791331 | -1.461932 | 1.119819  |
| C | -3.343823 | -1.276021 | 2.535144  |
| C | -3.305631 | -2.768995 | 0.510015  |
| C | -4.455989 | -0.063990 | -0.127708 |
| C | -4.810161 | 0.934861  | -1.016529 |
| C | -3.831411 | 1.725765  | -1.590984 |
| C | -2.489953 | 1.574717  | -1.253437 |
| C | -1.462639 | 2.452533  | -1.950174 |
| C | -1.370686 | 2.096198  | -3.437101 |
| C | -1.759725 | 3.942937  | -1.771638 |
| C | -0.277830 | 0.665884  | 1.513487  |
| C | -0.297695 | 2.120407  | 2.040400  |
| C | -1.733893 | 2.648301  | 2.119763  |
| C | 0.554494  | 3.064724  | 1.191550  |
| C | 0.260765  | 2.070285  | 3.469988  |
| C | 1.139976  | 0.048012  | 1.413098  |
| C | 3.621528  | 0.200722  | -0.425568 |
| C | 4.747664  | -0.047039 | 0.349253  |
| C | 5.731023  | 0.926052  | 0.492642  |
| C | 5.595294  | 2.154171  | -0.133869 |
| C | 4.471431  | 2.409737  | -0.911408 |
| C | 3.494836  | 1.438432  | -1.055716 |
| H | 1.090579  | -3.322782 | 1.744794  |
| H | -0.769131 | -4.878423 | 1.320804  |
| H | -1.241240 | -5.656695 | -0.982758 |
| H | 0.173434  | -4.867377 | -2.857659 |
| H | 2.034506  | -3.312031 | -2.434464 |
| H | 3.020995  | -2.174513 | 1.006016  |
| H | 3.721518  | -2.568500 | -0.553655 |
| H | 2.293418  | -0.905240 | -1.673558 |
| H | -0.003643 | -0.322048 | -1.671531 |
| H | -1.705413 | -1.561385 | 1.184194  |
| H | -3.058017 | -2.119745 | 3.166867  |
| H | -2.973108 | -0.360889 | 3.003261  |
| H | -4.435115 | -1.220776 | 2.521056  |
| H | -3.004313 | -3.613446 | 1.133639  |
| H | -2.896692 | -2.926356 | -0.490483 |
| H | -4.395615 | -2.777534 | 0.440727  |
| H | -5.225762 | -0.705871 | 0.285391  |
| H | -5.851196 | 1.083084  | -1.279211 |
| H | -4.114879 | 2.480068  | -2.316239 |
| H | -0.482559 | 2.262233  | -1.511410 |

|   |           |           |           |
|---|-----------|-----------|-----------|
| H | -0.595744 | 2.694265  | -3.921223 |
| H | -1.130249 | 1.040889  | -3.585932 |
| H | -2.317429 | 2.295572  | -3.944993 |
| H | -0.958638 | 4.538455  | -2.214842 |
| H | -1.842299 | 4.216242  | -0.717398 |
| H | -2.693016 | 4.222620  | -2.265156 |
| H | -0.891906 | 0.070511  | 2.189220  |
| H | -2.371021 | 1.982357  | 2.708378  |
| H | -1.733103 | 3.624335  | 2.609910  |
| H | -2.190393 | 2.771087  | 1.137789  |
| H | 0.161196  | 3.167792  | 0.179669  |
| H | 0.554832  | 4.058585  | 1.643973  |
| H | 1.596497  | 2.742332  | 1.119121  |
| H | 1.304122  | 1.749266  | 3.502965  |
| H | -0.325327 | 1.394665  | 4.099003  |
| H | 0.211828  | 3.066434  | 3.913609  |
| H | 1.927176  | 0.746317  | 1.693725  |
| H | 1.240231  | -0.851420 | 2.021120  |
| H | 4.877208  | -0.999305 | 0.848758  |
| H | 6.605016  | 0.717531  | 1.098699  |
| H | 6.362089  | 2.911729  | -0.020744 |
| H | 4.358447  | 3.366095  | -1.408614 |
| H | 2.621218  | 1.645452  | -1.667172 |

ωB97X energy = -1392.87444377 a.u.

(5R,1'R)-5a, Conf. B

|   |           |           |           |
|---|-----------|-----------|-----------|
| C | 0.857567  | 3.651618  | -0.723461 |
| C | -0.181894 | 4.537921  | -0.470937 |
| C | -0.409586 | 4.993864  | 0.819316  |
| C | 0.411641  | 4.564296  | 1.854371  |
| C | 1.450879  | 3.681553  | 1.598014  |
| C | 1.684753  | 3.212541  | 0.306363  |
| C | 2.800802  | 2.233717  | 0.037097  |
| C | 2.498126  | 0.835492  | 0.587140  |
| N | 1.265600  | 0.304569  | -0.008598 |
| C | 0.139946  | 0.095198  | 0.613084  |
| N | -0.797972 | -0.449423 | -0.131166 |
| C | -2.168947 | -0.587796 | 0.300229  |
| C | -3.133137 | 0.261161  | -0.261196 |
| C | -2.797961 | 1.421910  | -1.185749 |
| C | -3.346830 | 1.199473  | -2.597115 |
| C | -3.315155 | 2.742867  | -0.609297 |
| C | -4.463240 | 0.049017  | 0.088013  |
| C | -4.817918 | -0.928148 | 1.000360  |
| C | -3.838562 | -1.698788 | 1.600832  |
| C | -2.495758 | -1.549795 | 1.267765  |
| C | -1.468963 | -2.403839 | 1.994494  |
| C | -1.395558 | -2.015199 | 3.474559  |
| C | -1.752861 | -3.900146 | 1.845986  |
| C | -0.273776 | -0.697834 | -1.511788 |
| C | -0.267103 | -2.167808 | -1.994340 |
| C | 0.597707  | -3.070671 | -1.113648 |
| C | 0.294795  | -2.153366 | -3.423419 |
| C | -1.694577 | -2.720366 | -2.061759 |
| C | 1.132464  | -0.053641 | -1.424072 |

|   |           |           |           |
|---|-----------|-----------|-----------|
| C | 3.612532  | -0.185946 | 0.415599  |
| C | 3.574107  | -1.344934 | 1.189602  |
| C | 4.544247  | -2.323684 | 1.046917  |
| C | 5.569771  | -2.155036 | 0.123920  |
| C | 5.617212  | -1.004598 | -0.647353 |
| C | 4.642602  | -0.023572 | -0.503056 |
| H | 1.035445  | 3.312121  | -1.739500 |
| H | -0.811915 | 4.875075  | -1.286316 |
| H | -1.219404 | 5.686537  | 1.017951  |
| H | 0.246648  | 4.923844  | 2.863714  |
| H | 2.095288  | 3.360730  | 2.411269  |
| H | 2.992444  | 2.185387  | -1.036806 |
| H | 3.725540  | 2.573902  | 0.508800  |
| H | 2.284977  | 0.927408  | 1.654499  |
| H | -0.013414 | 0.351750  | 1.654466  |
| H | -1.712160 | 1.521369  | -1.250157 |
| H | -3.059345 | 2.026244  | -3.250066 |
| H | -2.974969 | 0.272327  | -3.040154 |
| H | -4.438137 | 1.144464  | -2.584708 |
| H | -3.016309 | 3.571610  | -1.254822 |
| H | -2.906021 | 2.926313  | 0.386677  |
| H | -4.405113 | 2.750484  | -0.539469 |
| H | -5.233435 | 0.676202  | -0.346410 |
| H | -5.859742 | -1.074963 | 1.260651  |
| H | -4.122733 | -2.435834 | 2.343357  |
| H | -0.485592 | -2.215935 | 1.562106  |
| H | -0.619020 | -2.594729 | 3.978297  |
| H | -1.168145 | -0.954533 | 3.604712  |
| H | -2.344814 | -2.214854 | 3.977639  |
| H | -0.954657 | -4.479297 | 2.315314  |
| H | -1.816898 | -4.198807 | 0.797364  |
| H | -2.691853 | -4.174841 | 2.331399  |
| H | -0.895155 | -0.133540 | -2.206961 |
| H | 0.199872  | -3.152156 | -0.101506 |
| H | 0.620635  | -4.077087 | -1.536808 |
| H | 1.632807  | -2.725537 | -1.044706 |
| H | 1.334090  | -1.820388 | -3.464120 |
| H | 0.259664  | -3.162858 | -3.837161 |
| H | -0.298067 | -1.504360 | -4.073742 |
| H | -2.339228 | -2.082148 | -2.672577 |
| H | -2.152747 | -2.819520 | -1.077953 |
| H | -1.677432 | -3.710829 | -2.521709 |
| H | 1.930658  | -0.739738 | -1.702922 |
| H | 1.213652  | 0.842473  | -2.040222 |
| H | 2.777473  | -1.481642 | 1.915247  |
| H | 4.503054  | -3.217598 | 1.658380  |
| H | 6.330585  | -2.918619 | 0.010878  |
| H | 6.414351  | -0.864869 | -1.368228 |
| H | 4.701773  | 0.867648  | -1.116160 |

$\omega_{B97X}$  energy = -1392.87439587 a.u.

(5*R*,1'*R*)-5a, Conf. C

|   |          |          |           |
|---|----------|----------|-----------|
| C | 0.922896 | 3.115518 | -1.572440 |
| C | 0.183857 | 4.252939 | -1.266764 |
| C | 0.482947 | 4.992553 | -0.132846 |

|   |           |           |           |
|---|-----------|-----------|-----------|
| C | 1.532335  | 4.595287  | 0.687416  |
| C | 2.267916  | 3.461469  | 0.378847  |
| C | 1.967633  | 2.702327  | -0.752003 |
| C | 2.749233  | 1.447202  | -1.066102 |
| C | 2.708687  | 0.413980  | 0.067205  |
| N | 1.332654  | 0.066938  | 0.435138  |
| C | 0.305111  | -0.085264 | -0.351761 |
| N | -0.803110 | -0.434858 | 0.266145  |
| C | -1.974903 | -0.932147 | -0.418033 |
| C | -2.227741 | -2.310444 | -0.365759 |
| C | -1.257657 | -3.320209 | 0.228233  |
| C | -1.860923 | -4.046202 | 1.432746  |
| C | -0.795927 | -4.320361 | -0.835414 |
| C | -3.409034 | -2.775006 | -0.935122 |
| C | -4.283063 | -1.912886 | -1.572367 |
| C | -3.971272 | -0.569286 | -1.679137 |
| C | -2.811586 | -0.047355 | -1.113723 |
| C | -2.494261 | 1.423203  | -1.334769 |
| C | -2.257548 | 1.693723  | -2.824273 |
| C | -3.583558 | 2.350275  | -0.792289 |
| C | -0.561916 | -0.500937 | 1.742212  |
| C | -1.362329 | 0.510406  | 2.594785  |
| C | -2.862634 | 0.225890  | 2.476048  |
| C | -1.066322 | 1.959401  | 2.204886  |
| C | -0.960861 | 0.277341  | 4.057947  |
| C | 0.972657  | -0.318429 | 1.803872  |
| C | 3.534080  | -0.823846 | -0.235694 |
| C | 4.767154  | -0.992218 | 0.383856  |
| C | 5.556712  | -2.097329 | 0.093020  |
| C | 5.115334  | -3.046386 | -0.817089 |
| C | 3.882526  | -2.886106 | -1.437015 |
| C | 3.097823  | -1.779911 | -1.148579 |
| H | 0.688954  | 2.551625  | -2.471246 |
| H | -0.624733 | 4.562287  | -1.920262 |
| H | -0.092128 | 5.879020  | 0.108327  |
| H | 1.780114  | 5.173263  | 1.570483  |
| H | 3.088854  | 3.169634  | 1.026648  |
| H | 2.394565  | 1.000588  | -1.999101 |
| H | 3.803659  | 1.682940  | -1.227663 |
| H | 3.123060  | 0.881971  | 0.962092  |
| H | 0.350113  | 0.048123  | -1.425050 |
| H | -0.360530 | -2.796409 | 0.561195  |
| H | -2.727951 | -4.640583 | 1.134538  |
| H | -1.126518 | -4.723534 | 1.873466  |
| H | -2.189861 | -3.348287 | 2.206980  |
| H | -1.627627 | -4.927406 | -1.200240 |
| H | -0.049550 | -4.996309 | -0.412440 |
| H | -0.348318 | -3.809072 | -1.690578 |
| H | -3.637540 | -3.834159 | -0.895223 |
| H | -5.198495 | -2.293803 | -2.010064 |
| H | -4.642117 | 0.090471  | -2.217860 |
| H | -1.568890 | 1.668370  | -0.810977 |
| H | -1.957965 | 2.733218  | -2.977116 |
| H | -1.477803 | 1.047616  | -3.234841 |
| H | -3.168531 | 1.522133  | -3.402340 |
| H | -3.288755 | 3.392493  | -0.936630 |

|   |           |           |           |
|---|-----------|-----------|-----------|
| H | -3.758042 | 2.194398  | 0.274059  |
| H | -4.530593 | 2.197091  | -1.314896 |
| H | -0.835284 | -1.498924 | 2.083669  |
| H | -3.088409 | -0.810326 | 2.743710  |
| H | -3.413143 | 0.875033  | 3.160369  |
| H | -3.244164 | 0.403450  | 1.471431  |
| H | -1.348694 | 2.171257  | 1.171807  |
| H | -1.638654 | 2.633974  | 2.845114  |
| H | -0.010266 | 2.215957  | 2.324498  |
| H | 0.089171  | 0.507272  | 4.249446  |
| H | -1.144010 | -0.758624 | 4.356174  |
| H | -1.559225 | 0.922419  | 4.704096  |
| H | 1.276382  | 0.468638  | 2.491899  |
| H | 1.498152  | -1.237917 | 2.068938  |
| H | 5.113160  | -0.255315 | 1.101710  |
| H | 6.515278  | -2.217948 | 0.584139  |
| H | 5.727996  | -3.911628 | -1.042030 |
| H | 3.530805  | -3.624253 | -2.148349 |
| H | 2.138508  | -1.676452 | -1.646229 |

ωB97X energy = -1392.87361413 a.u.

(5*R*,1'*R*)-**5a**, Conf. D

|   |           |           |           |
|---|-----------|-----------|-----------|
| C | 1.194034  | 3.207342  | 0.666281  |
| C | 0.368570  | 4.311371  | 0.845140  |
| C | 0.008483  | 5.097688  | -0.238753 |
| C | 0.472195  | 4.768067  | -1.505990 |
| C | 1.285079  | 3.659239  | -1.682851 |
| C | 1.663093  | 2.866357  | -0.599272 |
| C | 2.600325  | 1.700724  | -0.847268 |
| C | 2.645813  | 0.613410  | 0.224065  |
| N | 1.340328  | -0.012339 | 0.446032  |
| C | 0.265189  | 0.061558  | -0.287724 |
| N | -0.772291 | -0.576806 | 0.208704  |
| C | -1.983185 | -0.818995 | -0.540631 |
| C | -2.201771 | -2.108662 | -1.045023 |
| C | -1.161919 | -3.216773 | -0.987759 |
| C | -1.628167 | -4.392202 | -0.125979 |
| C | -0.793802 | -3.689466 | -2.396952 |
| C | -3.417602 | -2.360979 | -1.672054 |
| C | -4.359325 | -1.360698 | -1.835383 |
| C | -4.084813 | -0.076678 | -1.399803 |
| C | -2.893041 | 0.227433  | -0.748581 |
| C | -2.629702 | 1.671867  | -0.353023 |
| C | -2.514583 | 2.553220  | -1.600642 |
| C | -3.699295 | 2.221864  | 0.592751  |
| C | -0.410164 | -1.210694 | 1.515498  |
| C | -1.238895 | -0.771649 | 2.744661  |
| C | -2.711830 | -1.153271 | 2.562847  |
| C | -1.118706 | 0.726988  | 3.024702  |
| C | -0.697386 | -1.563655 | 3.942945  |
| C | 1.097807  | -0.874526 | 1.607760  |
| C | 3.695124  | -0.437675 | -0.092441 |
| C | 3.459145  | -1.433183 | -1.035717 |
| C | 4.446097  | -2.360727 | -1.335797 |
| C | 5.678861  | -2.298199 | -0.698610 |

|   |           |           |           |
|---|-----------|-----------|-----------|
| C | 5.919048  | -1.307028 | 0.242130  |
| C | 4.928538  | -0.382762 | 0.545667  |
| H | 1.467703  | 2.618957  | 1.535501  |
| H | 0.011372  | 4.556280  | 1.839120  |
| H | -0.632895 | 5.960229  | -0.098778 |
| H | 0.193340  | 5.372479  | -2.361704 |
| H | 1.638231  | 3.405214  | -2.677540 |
| H | 2.382565  | 1.249727  | -1.820411 |
| H | 3.622796  | 2.079096  | -0.928980 |
| H | 2.915273  | 1.071778  | 1.179695  |
| H | 0.219939  | 0.588381  | -1.232323 |
| H | -0.245595 | -2.815365 | -0.551522 |
| H | -2.516746 | -4.860518 | -0.556121 |
| H | -0.845575 | -5.151190 | -0.065080 |
| H | -1.879078 | -4.079820 | 0.891027  |
| H | 0.005088  | -4.432254 | -2.343890 |
| H | -0.448079 | -2.858108 | -3.014923 |
| H | -1.646984 | -4.152651 | -2.897586 |
| H | -3.621874 | -3.353487 | -2.057808 |
| H | -5.301005 | -1.576454 | -2.326730 |
| H | -4.812109 | 0.709312  | -1.569183 |
| H | -1.672503 | 1.729461  | 0.167800  |
| H | -2.280050 | 3.580226  | -1.313391 |
| H | -1.724452 | 2.204087  | -2.270095 |
| H | -3.452181 | 2.562224  | -2.161968 |
| H | -3.438045 | 3.238449  | 0.896148  |
| H | -3.797398 | 1.614831  | 1.495134  |
| H | -4.676169 | 2.261626  | 0.105384  |
| H | -0.543022 | -2.287207 | 1.407692  |
| H | -2.819485 | -2.212694 | 2.312726  |
| H | -3.248816 | -0.976406 | 3.497250  |
| H | -3.203070 | -0.571959 | 1.783124  |
| H | -1.454220 | 1.329177  | 2.178691  |
| H | -1.742398 | 0.989166  | 3.881874  |
| H | -0.095894 | 1.023919  | 3.269110  |
| H | 0.351388  | -1.343043 | 4.153427  |
| H | -0.793834 | -2.640351 | 3.778966  |
| H | -1.270626 | -1.308038 | 4.836130  |
| H | 1.355317  | -0.332673 | 2.517352  |
| H | 1.731053  | -1.760043 | 1.540249  |
| H | 2.498705  | -1.496913 | -1.538689 |
| H | 4.251713  | -3.134471 | -2.069420 |
| H | 6.448479  | -3.024360 | -0.933091 |
| H | 6.876848  | -1.254959 | 0.746591  |
| H | 5.116736  | 0.386513  | 1.287905  |

ωB97X energy = -1392.87329219 a.u.

(5*R*,1'*R*)-**5a**, Conf. E

|   |           |           |           |
|---|-----------|-----------|-----------|
| C | -1.088673 | -3.029725 | -1.310577 |
| C | -0.373628 | -4.184694 | -1.018023 |
| C | -0.747352 | -4.979232 | 0.055393  |
| C | -1.842161 | -4.615301 | 0.830565  |
| C | -2.554998 | -3.462536 | 0.533918  |
| C | -2.184307 | -2.653183 | -0.539128 |
| C | -2.945689 | -1.388595 | -0.856679 |

|   |           |           |           |
|---|-----------|-----------|-----------|
| C | -2.783328 | -0.300616 | 0.213085  |
| N | -1.362413 | -0.093128 | 0.539316  |
| C | -0.438323 | 0.295790  | -0.291578 |
| N | 0.778368  | 0.307213  | 0.210632  |
| C | 1.868412  | 0.969755  | -0.470862 |
| C | 2.130625  | 2.312893  | -0.169009 |
| C | 1.257744  | 3.151168  | 0.752321  |
| C | 2.027279  | 3.626678  | 1.986125  |
| C | 0.648136  | 4.334285  | -0.004834 |
| C | 3.220941  | 2.913090  | -0.791395 |
| C | 3.990837  | 2.220809  | -1.709519 |
| C | 3.668270  | 0.916487  | -2.040600 |
| C | 2.600500  | 0.262501  | -1.433753 |
| C | 2.258214  | -1.152253 | -1.868183 |
| C | 1.718694  | -1.166427 | -3.301515 |
| C | 3.450132  | -2.102130 | -1.734420 |
| C | 0.720184  | -0.026457 | 1.671223  |
| C | 1.736030  | -1.045934 | 2.231834  |
| C | 3.165759  | -0.514660 | 2.087251  |
| C | 1.629789  | -2.426753 | 1.585229  |
| C | 1.424017  | -1.166952 | 3.731053  |
| C | -0.759306 | -0.453053 | 1.826775  |
| C | -3.444538 | 1.032712  | -0.117181 |
| C | -3.245810 | 2.111474  | 0.745967  |
| C | -3.838414 | 3.337490  | 0.497368  |
| C | -4.645548 | 3.505585  | -0.622224 |
| C | -4.850621 | 2.440354  | -1.483038 |
| C | -4.252899 | 1.208940  | -1.233229 |
| H | -0.797243 | -2.420723 | -2.162026 |
| H | 0.476056  | -4.461728 | -1.632909 |
| H | -0.192716 | -5.881385 | 0.286248  |
| H | -2.146176 | -5.235896 | 1.665826  |
| H | -3.416820 | -3.195978 | 1.138760  |
| H | -2.617138 | -1.003057 | -1.825468 |
| H | -4.011796 | -1.607607 | -0.947736 |
| H | -3.219327 | -0.671085 | 1.143908  |
| H | -0.645148 | 0.606096  | -1.309576 |
| H | 0.418061  | 2.544476  | 1.095752  |
| H | 2.854815  | 4.281425  | 1.702749  |
| H | 1.367402  | 4.189510  | 2.649554  |
| H | 2.443917  | 2.788680  | 2.550439  |
| H | -0.032752 | 4.884639  | 0.648256  |
| H | 0.085942  | 3.995877  | -0.878161 |
| H | 1.418926  | 5.029281  | -0.345844 |
| H | 3.457519  | 3.947823  | -0.569886 |
| H | 4.834295  | 2.707601  | -2.185403 |
| H | 4.255996  | 0.395132  | -2.787890 |
| H | 1.462443  | -1.524491 | -1.222126 |
| H | 1.447973  | -2.185358 | -3.589988 |
| H | 0.832198  | -0.535960 | -3.407389 |
| H | 2.470740  | -0.806623 | -4.008096 |
| H | 3.138210  | -3.125766 | -1.955276 |
| H | 3.870832  | -2.086151 | -0.726520 |
| H | 4.246689  | -1.840502 | -2.434700 |
| H | 0.888750  | 0.908973  | 2.210670  |
| H | 3.266630  | 0.481867  | 2.526624  |

|   |           |           |           |
|---|-----------|-----------|-----------|
| H | 3.853844  | -1.180032 | 2.613154  |
| H | 3.487476  | -0.459757 | 1.046803  |
| H | 1.852875  | -2.399103 | 0.519204  |
| H | 2.351773  | -3.098766 | 2.054508  |
| H | 0.642649  | -2.878575 | 1.707338  |
| H | 0.430655  | -1.583833 | 3.913945  |
| H | 1.486186  | -0.195828 | 4.229695  |
| H | 2.150232  | -1.832668 | 4.201101  |
| H | -0.873153 | -1.527419 | 1.980555  |
| H | -1.261811 | 0.072751  | 2.637769  |
| H | -2.619037 | 1.994446  | 1.624443  |
| H | -3.673302 | 4.163066  | 1.180005  |
| H | -5.111341 | 4.464178  | -0.818952 |
| H | -5.476901 | 2.560920  | -2.359362 |
| H | -4.429909 | 0.393895  | -1.923783 |

ωB97X energy = -1392.87234090 a.u.

(5R,1'R)-5a, Conf. F

|   |           |           |           |
|---|-----------|-----------|-----------|
| C | -4.420312 | -2.433764 | 0.279793  |
| C | -5.780209 | -2.708491 | 0.301286  |
| C | -6.632540 | -2.073849 | -0.593029 |
| C | -6.116427 | -1.166734 | -1.508211 |
| C | -4.754937 | -0.893381 | -1.526297 |
| C | -3.894043 | -1.522265 | -0.632472 |
| C | -2.418439 | -1.205860 | -0.621859 |
| C | -2.068640 | -0.233943 | 0.513163  |
| N | -0.618179 | -0.075634 | 0.655779  |
| C | 0.319615  | -0.400260 | -0.186991 |
| N | 1.538632  | -0.101466 | 0.212112  |
| C | 2.669557  | -0.128808 | -0.688084 |
| C | 3.093920  | 1.078166  | -1.261398 |
| C | 2.346752  | 2.392455  | -1.096114 |
| C | 3.185788  | 3.433798  | -0.353107 |
| C | 1.882496  | 2.929608  | -2.452734 |
| C | 4.232889  | 1.049574  | -2.060122 |
| C | 4.893924  | -0.137656 | -2.320960 |
| C | 4.409420  | -1.326315 | -1.804783 |
| C | 3.288348  | -1.351774 | -0.980708 |
| C | 2.770586  | -2.692280 | -0.487884 |
| C | 2.213355  | -3.514982 | -1.653689 |
| C | 3.840480  | -3.483175 | 0.267483  |
| C | 1.487812  | 0.587184  | 1.539858  |
| C | 2.351662  | -0.009061 | 2.674280  |
| C | 3.839358  | 0.099833  | 2.324374  |
| C | 2.000021  | -1.462583 | 2.989390  |
| C | 2.093761  | 0.858624  | 3.914654  |
| C | -0.034380 | 0.586800  | 1.827426  |
| C | -2.723377 | 1.125203  | 0.345210  |
| C | -2.300718 | 1.997016  | -0.654575 |
| C | -2.925670 | 3.222440  | -0.826913 |
| C | -3.982821 | 3.586832  | -0.001575 |
| C | -4.407276 | 2.722683  | 0.996792  |
| C | -3.776242 | 1.497178  | 1.171168  |
| H | -3.758941 | -2.939309 | 0.977218  |
| H | -6.174237 | -3.422898 | 1.015175  |

|                                                 |           |           |           |   |           |           |           |
|-------------------------------------------------|-----------|-----------|-----------|---|-----------|-----------|-----------|
| H                                               | -7.695084 | -2.287883 | -0.578190 | C | -2.151612 | -0.332195 | 0.368955  |
| H                                               | -6.774832 | -0.669458 | -2.211412 | C | -3.093952 | 0.554734  | -0.169889 |
| H                                               | -4.357239 | -0.181181 | -2.242533 | C | -2.749077 | 1.625558  | -1.193961 |
| H                                               | -1.848816 | -2.129258 | -0.484932 | C | -3.520646 | 1.435350  | -2.500841 |
| H                                               | -2.133148 | -0.772069 | -1.583799 | C | -2.984881 | 3.023191  | -0.614048 |
| H                                               | -2.411758 | -0.671561 | 1.454785  | C | -4.399011 | 0.477758  | 0.306368  |
| H                                               | 0.128466  | -0.865271 | -1.145429 | C | -4.743531 | -0.413907 | 1.306853  |
| H                                               | 1.440422  | 2.212437  | -0.516077 | C | -3.777215 | -1.227206 | 1.872297  |
| H                                               | 2.609550  | 4.349125  | -0.203403 | C | -2.460280 | -1.201066 | 1.423313  |
| H                                               | 3.509191  | 3.070612  | 0.625775  | C | -1.423958 | -2.061422 | 2.125632  |
| H                                               | 4.082002  | 3.691286  | -0.922777 | C | -1.194919 | -1.564109 | 3.556260  |
| H                                               | 1.289900  | 3.836088  | -2.311036 | C | -1.804541 | -3.543112 | 2.125147  |
| H                                               | 1.266002  | 2.196169  | -2.977173 | C | -0.417696 | -0.748731 | -1.550245 |
| H                                               | 2.729771  | 3.181495  | -3.094489 | C | -0.594139 | -2.232792 | -1.936000 |
| H                                               | 4.596901  | 1.970069  | -2.502721 | C | -2.075382 | -2.623052 | -1.894361 |
| H                                               | 5.777729  | -0.139460 | -2.948447 | C | 0.219699  | -3.186730 | -1.062180 |
| H                                               | 4.911769  | -2.255982 | -2.046970 | C | -0.115246 | -2.350113 | -3.390533 |
| H                                               | 1.945880  | -2.511313 | 0.201954  | C | 1.039549  | -0.234789 | -1.627465 |
| H                                               | 1.792971  | -4.453149 | -1.285147 | C | 1.890523  | 2.888732  | 0.162031  |
| H                                               | 1.427260  | -2.976510 | -2.188462 | C | 2.133752  | 3.512411  | 1.378898  |
| H                                               | 2.999555  | -3.757285 | -2.372982 | C | 1.687917  | 4.811338  | 1.604937  |
| H                                               | 3.408815  | -4.400119 | 0.674696  | C | 0.996802  | 5.495202  | 0.618929  |
| H                                               | 4.258849  | -2.908464 | 1.096834  | C | 0.753130  | 4.878901  | -0.604010 |
| H                                               | 4.662793  | -3.768570 | -0.392420 | C | 1.198569  | 3.588090  | -0.828274 |
| H                                               | 1.832845  | 1.611340  | 1.388191  | H | 2.308941  | -1.536191 | 2.005134  |
| H                                               | 4.116475  | 1.131376  | 2.089062  | H | 2.941647  | -3.832605 | 1.369180  |
| H                                               | 4.438052  | -0.217808 | 3.180833  | H | 4.617334  | -4.211833 | -0.413938 |
| H                                               | 4.115906  | -0.526641 | 1.475861  | H | 5.660473  | -2.272344 | -1.550536 |
| H                                               | 2.232972  | -2.127127 | 2.157410  | H | 5.029468  | 0.021503  | -0.913928 |
| H                                               | 2.584524  | -1.798083 | 3.848654  | H | 2.652864  | 0.795094  | 1.887226  |
| H                                               | 0.946132  | -1.593787 | 3.244764  | H | 4.083518  | 1.432390  | 1.085551  |
| H                                               | 1.064775  | 0.779634  | 4.272500  | H | 2.907774  | 1.481315  | -1.072363 |
| H                                               | 2.306193  | 1.912216  | 3.713599  | H | -0.022852 | 1.038601  | 1.238564  |
| H                                               | 2.747398  | 0.534151  | 4.726446  | H | -1.684454 | 1.568477  | -1.426372 |
| H                                               | -0.296278 | 0.019993  | 2.720838  | H | -3.215094 | 2.186331  | -3.232182 |
| H                                               | -0.443866 | 1.592999  | 1.920258  | H | -3.345222 | 0.447226  | -2.933644 |
| H                                               | -1.477184 | 1.725120  | -1.309258 | H | -4.596029 | 1.542604  | -2.340368 |
| H                                               | -2.587889 | 3.894980  | -1.606877 | H | -2.667148 | 3.783223  | -1.331515 |
| H                                               | -4.471558 | 4.544732  | -0.136438 | H | -2.419218 | 3.168782  | 0.309402  |
| H                                               | -5.228659 | 3.002274  | 1.646295  | H | -4.042016 | 3.190068  | -0.394591 |
| H                                               | -4.109073 | 0.823506  | 1.954347  | H | -5.153945 | 1.142320  | -0.098936 |
| $\omega$ B97X energy = -1392.87230332 a.u.      |           |           |           | H | -5.765544 | -0.458162 | 1.665249  |
| (5 <i>R</i> ,1' <i>R</i> )- <b>5a</b> , Conf. G |           |           |           | H | -4.049676 | -1.893202 | 2.683343  |
| C                                               | 3.040516  | -1.694564 | 1.217904  | H | -0.476661 | -1.958386 | 1.594842  |
| C                                               | 3.399207  | -2.989583 | 0.863745  | H | -0.411312 | -2.153096 | 4.038203  |
| C                                               | 4.336955  | -3.202403 | -0.135869 | H | -0.892170 | -0.514592 | 3.573755  |
| C                                               | 4.920059  | -2.114172 | -0.774652 | H | -2.104649 | -1.660619 | 4.154152  |
| C                                               | 4.562211  | -0.823051 | -0.416212 | H | -1.004266 | -4.134023 | 2.576317  |
| C                                               | 3.614251  | -0.598573 | 0.581295  | H | -1.973326 | -3.918915 | 1.113557  |
| C                                               | 3.199699  | 0.806858  | 0.940825  | H | -2.713906 | -3.719226 | 2.704284  |
| C                                               | 2.336885  | 1.464570  | -0.141049 | H | -1.042577 | -0.173170 | -2.238996 |
| N                                               | 1.157055  | 0.635822  | -0.451931 | H | -2.684744 | -1.931311 | -2.483052 |
| C                                               | 0.106689  | 0.501620  | 0.305732  | H | -2.199198 | -3.620495 | -2.321547 |
| N                                               | -0.807912 | -0.320239 | -0.167363 | H | -2.474297 | -2.644842 | -0.879857 |
|                                                 |           |           |           | H | -0.038399 | -3.097826 | -0.006874 |
|                                                 |           |           |           | H | 0.015837  | -4.215798 | -1.366315 |

|   |           |           |           |
|---|-----------|-----------|-----------|
| H | 1.295832  | -3.028655 | -1.158376 |
| H | 0.947593  | -2.119283 | -3.495906 |
| H | -0.679165 | -1.683445 | -4.048689 |
| H | -0.264825 | -3.372765 | -3.741915 |
| H | 1.772618  | -1.039381 | -1.549149 |
| H | 1.233408  | 0.333746  | -2.535847 |
| H | 2.672164  | 2.999905  | 2.166697  |
| H | 1.883551  | 5.284244  | 2.560266  |
| H | 0.648714  | 6.505887  | 0.797751  |
| H | 0.218375  | 5.407973  | -1.384389 |
| H | 1.004617  | 3.114924  | -1.786336 |

ωB97X energy = -1392.87189851 a.u.

(5*R*,1'*R*)-**5a**, Conf. H

|   |           |           |           |
|---|-----------|-----------|-----------|
| C | -5.319297 | -1.287417 | -0.693833 |
| C | -6.585512 | -1.455889 | -0.148044 |
| C | -6.733849 | -2.046054 | 1.098937  |
| C | -5.609476 | -2.470889 | 1.795601  |
| C | -4.346836 | -2.302557 | 1.246417  |
| C | -4.186426 | -1.706551 | -0.003242 |
| C | -2.803504 | -1.515762 | -0.578427 |
| C | -2.031936 | -0.409762 | 0.150870  |
| N | -0.628990 | -0.392566 | -0.292033 |
| C | 0.414300  | -0.463957 | 0.485621  |
| N | 1.560905  | -0.251296 | -0.123926 |
| C | 2.844278  | -0.479426 | 0.497185  |
| C | 3.617508  | -1.562033 | 0.054671  |
| C | 3.124016  | -2.590184 | -0.951613 |
| C | 3.917675  | -2.527249 | -2.258924 |
| C | 3.169982  | -4.001882 | -0.360296 |
| C | 4.887095  | -1.718669 | 0.602263  |
| C | 5.353246  | -0.865946 | 1.586545  |
| C | 4.542660  | 0.151294  | 2.057212  |
| C | 3.274546  | 0.369798  | 1.528090  |
| C | 2.423509  | 1.479416  | 2.125569  |
| C | 2.038490  | 1.142502  | 3.569526  |
| C | 3.114497  | 2.842778  | 2.056965  |
| C | 1.314735  | 0.098984  | -1.558907 |
| C | 1.728560  | 1.525907  | -1.991063 |
| C | 3.238782  | 1.720236  | -1.820764 |
| C | 0.973724  | 2.614002  | -1.224709 |
| C | 1.409727  | 1.641983  | -3.488510 |
| C | -0.201117 | -0.188015 | -1.681222 |
| C | -2.615749 | 0.987987  | 0.030251  |
| C | -3.144379 | 1.472449  | -1.163241 |
| C | -3.608811 | 2.777936  | -1.248426 |
| C | -3.555728 | 3.611643  | -0.139948 |
| C | -3.037224 | 3.134368  | 1.055918  |
| C | -2.569818 | 1.830606  | 1.137392  |
| H | -5.212492 | -0.826224 | -1.670336 |
| H | -7.457905 | -1.125402 | -0.700370 |
| H | -7.721257 | -2.178569 | 1.526036  |
| H | -5.716928 | -2.940067 | 2.766983  |
| H | -3.474482 | -2.648927 | 1.792889  |
| H | -2.230447 | -2.441006 | -0.477870 |

|   |           |           |           |
|---|-----------|-----------|-----------|
| H | -2.872062 | -1.297941 | -1.646203 |
| H | -1.995169 | -0.666826 | 1.211510  |
| H | 0.344687  | -0.688004 | 1.543385  |
| H | 2.075604  | -2.387256 | -1.175128 |
| H | 3.521798  | -3.246777 | -2.978699 |
| H | 3.879264  | -1.534554 | -2.714692 |
| H | 4.969147  | -2.769006 | -2.085452 |
| H | 2.736791  | -4.714506 | -1.065389 |
| H | 2.607032  | -4.058354 | 0.573485  |
| H | 4.195930  | -4.317023 | -0.157740 |
| H | 5.514054  | -2.536548 | 0.265314  |
| H | 6.343308  | -1.007778 | 2.004043  |
| H | 4.902884  | 0.793398  | 2.852998  |
| H | 1.497372  | 1.559375  | 1.555850  |
| H | 1.371768  | 1.908727  | 3.970648  |
| H | 1.530775  | 0.177437  | 3.638736  |
| H | 2.923565  | 1.097324  | 4.208669  |
| H | 2.446197  | 3.617548  | 2.438909  |
| H | 3.388067  | 3.106903  | 1.033207  |
| H | 4.022912  | 2.859015  | 2.663252  |
| H | 1.875535  | -0.601129 | -2.176672 |
| H | 3.800945  | 0.937676  | -2.338383 |
| H | 3.531711  | 2.680040  | -2.251641 |
| H | 3.545763  | 1.718907  | -0.775293 |
| H | 1.192732  | 2.588396  | -0.156301 |
| H | 1.276768  | 3.595494  | -1.595211 |
| H | -0.110392 | 2.541614  | -1.351466 |
| H | 0.341286  | 1.560515  | -3.699272 |
| H | 1.931084  | 0.872905  | -4.064783 |
| H | 1.740354  | 2.615799  | -3.854435 |
| H | -0.748865 | 0.644705  | -2.117552 |
| H | -0.409032 | -1.087887 | -2.260858 |
| H | -3.204521 | 0.836723  | -2.039898 |
| H | -4.017374 | 3.142391  | -2.183722 |
| H | -3.922697 | 4.629224  | -0.207161 |
| H | -2.998719 | 3.776534  | 1.928150  |
| H | -2.164396 | 1.462281  | 2.074986  |

ωB97X energy = -1392.87141632 a.u.

(5*R*,1'*R*)-**5a**, Conf. I

|   |           |           |           |
|---|-----------|-----------|-----------|
| C | -5.199824 | -0.341391 | -0.979190 |
| C | -6.541163 | -0.161050 | -0.668557 |
| C | -7.096510 | -0.812561 | 0.423882  |
| C | -6.304497 | -1.649269 | 1.199820  |
| C | -4.965380 | -1.830370 | 0.883759  |
| C | -4.397606 | -1.176090 | -0.207314 |
| C | -2.934010 | -1.352969 | -0.527728 |
| C | -2.042122 | -0.596810 | 0.469888  |
| N | -0.620129 | -0.809366 | 0.131664  |
| C | 0.349146  | 0.028985  | 0.379724  |
| N | 1.547262  | -0.414603 | 0.074444  |
| C | 2.751346  | 0.322534  | 0.374104  |
| C | 3.620062  | -0.185421 | 1.349566  |
| C | 3.300401  | -1.402173 | 2.204069  |
| C | 4.249465  | -2.566603 | 1.911943  |



|   |           |           |           |
|---|-----------|-----------|-----------|
| C | 3.324075  | -1.046187 | 3.693203  |
| C | 4.813381  | 0.494683  | 1.571545  |
| C | 5.108690  | 1.663390  | 0.893084  |
| C | 4.200138  | 2.184423  | -0.010823 |
| C | 3.005176  | 1.530565  | -0.294185 |
| C | 2.041316  | 2.177041  | -1.277806 |
| C | 1.451487  | 3.465259  | -0.695368 |
| C | 2.696196  | 2.448966  | -2.633777 |
| C | 1.447884  | -1.786983 | -0.512912 |
| C | 1.902333  | -1.936351 | -1.985333 |
| C | 3.381555  | -1.565282 | -2.132057 |
| C | 1.062104  | -1.096594 | -2.948552 |
| C | 1.756848  | -3.422706 | -2.341229 |
| C | -0.049189 | -2.103097 | -0.271280 |
| C | -2.350531 | 0.884778  | 0.520948  |
| C | -2.208511 | 1.682294  | -0.614039 |
| C | -2.503835 | 3.035043  | -0.561369 |
| C | -2.953345 | 3.604286  | 0.624877  |
| C | -3.101061 | 2.815625  | 1.755428  |
| C | -2.796520 | 1.460290  | 1.703401  |
| H | -4.770720 | 0.172303  | -1.833592 |
| H | -7.153426 | 0.489693  | -1.282570 |
| H | -8.143391 | -0.672239 | 0.667503  |
| H | -6.732026 | -2.165962 | 2.051659  |
| H | -4.355548 | -2.493321 | 1.490339  |
| H | -2.686006 | -2.416321 | -0.493223 |
| H | -2.727534 | -0.998358 | -1.540586 |
| H | -2.203874 | -1.023887 | 1.464439  |
| H | 0.185655  | 1.008040  | 0.810790  |
| H | 2.282195  | -1.725814 | 1.983948  |
| H | 3.974509  | -3.438728 | 2.508871  |
| H | 4.228880  | -2.856555 | 0.858455  |
| H | 5.279748  | -2.300359 | 2.160612  |
| H | 3.010631  | -1.908097 | 4.286164  |
| H | 2.648881  | -0.216610 | 3.912322  |
| H | 4.327050  | -0.764163 | 4.021236  |
| H | 5.513884  | 0.114253  | 2.306405  |
| H | 6.041422  | 2.181179  | 1.084317  |
| H | 4.424706  | 3.119523  | -0.511343 |
| H | 1.208999  | 1.495767  | -1.456118 |
| H | 0.721686  | 3.891284  | -1.387680 |
| H | 0.947755  | 3.287217  | 0.258415  |
| H | 2.232067  | 4.210616  | -0.524640 |
| H | 1.953091  | 2.834577  | -3.335141 |
| H | 3.128748  | 1.542602  | -3.063227 |
| H | 3.490460  | 3.193929  | -2.549667 |
| H | 2.069638  | -2.453660 | 0.084411  |
| H | 4.005808  | -2.133099 | -1.436562 |
| H | 3.714686  | -1.800941 | -3.145099 |
| H | 3.565080  | -0.504742 | -1.961270 |
| H | 1.163538  | -0.028379 | -2.753163 |
| H | 1.399648  | -1.271935 | -3.972136 |
| H | 0.000297  | -1.351756 | -2.911644 |
| H | 0.721955  | -3.768433 | -2.297403 |
| H | 2.353890  | -4.048633 | -1.672734 |
| H | 2.112609  | -3.587148 | -3.360071 |

|   |           |           |           |
|---|-----------|-----------|-----------|
| H | -0.540054 | -2.471151 | -1.168170 |
| H | -0.198013 | -2.826799 | 0.531927  |
| H | -1.859999 | 1.247403  | -1.546213 |
| H | -2.386347 | 3.646632  | -1.448461 |
| H | -3.185634 | 4.662123  | 0.665492  |
| H | -3.451124 | 3.253350  | 2.682959  |
| H | -2.908761 | 0.846851  | 2.591365  |

ωB97X energy = -1392.87128947 a.u.

(5*R*,1'*S*)-**5b**, Conf. A

|   |           |           |           |
|---|-----------|-----------|-----------|
| C | 1.524867  | 3.519382  | -1.502836 |
| C | 0.500165  | 4.426147  | -1.729859 |
| C | -0.334356 | 4.811687  | -0.687472 |
| C | -0.137751 | 4.284427  | 0.580069  |
| C | 0.893254  | 3.379713  | 0.803671  |
| C | 1.735324  | 2.986287  | -0.231336 |
| C | 2.848359  | 1.997570  | 0.012801  |
| C | 2.577997  | 0.628497  | -0.623818 |
| N | 1.358298  | 0.025280  | -0.068170 |
| C | 0.189592  | 0.010388  | -0.644143 |
| N | -0.771723 | -0.516547 | 0.083942  |
| C | -2.059930 | -0.870290 | -0.467728 |
| C | -3.038345 | 0.121881  | -0.617182 |
| C | -2.786114 | 1.599992  | -0.369770 |
| C | -2.864783 | 2.377598  | -1.687162 |
| C | -3.753009 | 2.189598  | 0.658921  |
| C | -4.295659 | -0.275857 | -1.062763 |
| C | -4.568392 | -1.600058 | -1.355251 |
| C | -3.566058 | -2.549022 | -1.259632 |
| C | -2.285351 | -2.202955 | -0.840721 |
| C | -1.196104 | -3.264663 | -0.863205 |
| C | -1.476250 | -4.393755 | 0.130584  |
| C | -1.013572 | -3.823117 | -2.277492 |
| C | -0.207818 | -1.025012 | 1.374422  |
| C | -0.932335 | -0.619098 | 2.677515  |
| C | -0.954904 | 0.893099  | 2.899994  |
| C | -0.161918 | -1.290774 | 3.823011  |
| C | -2.365434 | -1.162535 | 2.693011  |
| C | 1.262233  | -0.542943 | 1.281103  |
| C | 3.722366  | -0.366314 | -0.519257 |
| C | 3.759462  | -1.434921 | -1.413289 |
| C | 4.768549  | -2.381950 | -1.341359 |
| C | 5.757072  | -2.270972 | -0.370908 |
| C | 5.728343  | -1.210213 | 0.520923  |
| C | 4.715411  | -0.261366 | 0.447599  |
| H | 2.179635  | 3.233988  | -2.320938 |
| H | 0.355889  | 4.839237  | -2.721718 |
| H | -1.131737 | 5.524706  | -0.863906 |
| H | -0.782027 | 4.581175  | 1.400406  |
| H | 1.053243  | 2.987012  | 1.802796  |
| H | 3.782988  | 2.371120  | -0.412248 |
| H | 3.009615  | 1.889936  | 1.087490  |
| H | 2.364559  | 0.781366  | -1.684089 |
| H | 0.024230  | 0.383378  | -1.648092 |

|   |           |           |           |   |           |           |           |
|---|-----------|-----------|-----------|---|-----------|-----------|-----------|
| H | -1.774210 | 1.726667  | 0.019659  | C | -3.671532 | -2.447909 | -1.247908 |
| H | -2.651273 | 3.433908  | -1.512544 | C | -2.374575 | -2.156286 | -0.837889 |
| H | -2.144135 | 2.003626  | -2.418757 | C | -1.331227 | -3.262476 | -0.870095 |
| H | -3.861590 | 2.300560  | -2.128425 | C | -1.647116 | -4.375755 | 0.131097  |
| H | -3.486326 | 3.229027  | 0.865540  | C | -1.187904 | -3.833034 | -2.283982 |
| H | -3.728571 | 1.639719  | 1.602338  | C | -0.227458 | -1.079148 | 1.358680  |
| H | -4.781045 | 2.178386  | 0.289352  | C | -0.909144 | -0.628348 | 2.670581  |
| H | -5.076092 | 0.467069  | -1.182319 | C | -0.835402 | 0.882801  | 2.887237  |
| H | -5.559954 | -1.889584 | -1.683751 | C | -0.168806 | -1.345190 | 3.808484  |
| H | -3.776747 | -3.576717 | -1.533776 | C | -2.372383 | -1.083053 | 2.704496  |
| H | -0.245944 | -2.801098 | -0.592446 | C | 1.266153  | -0.679345 | 1.240726  |
| H | -0.661277 | -5.120271 | 0.117478  | C | 3.712516  | -0.432356 | -0.526835 |
| H | -1.583230 | -4.021625 | 1.152260  | C | 3.750949  | -1.478359 | -1.446791 |
| H | -2.398560 | -4.919569 | -0.128057 | C | 4.751551  | -2.435408 | -1.387197 |
| H | -0.184616 | -4.533922 | -2.293027 | C | 5.729765  | -2.356757 | -0.403377 |
| H | -0.795926 | -3.027202 | -2.992706 | C | 5.699172  | -1.318601 | 0.514788  |
| H | -1.909402 | -4.347892 | -2.616892 | C | 4.694680  | -0.360206 | 0.454068  |
| H | -0.235261 | -2.115303 | 1.325957  | H | 2.181564  | 3.096110  | -2.328135 |
| H | -1.394661 | 1.425508  | 2.055174  | H | 0.428007  | 4.769189  | -2.750053 |
| H | -1.553606 | 1.120722  | 3.784402  | H | -0.972890 | 5.605135  | -0.885788 |
| H | 0.042481  | 1.300789  | 3.077119  | H | -0.603480 | 4.742939  | 1.407686  |
| H | -0.147233 | -2.377653 | 3.705121  | H | 1.161265  | 3.078666  | 1.831520  |
| H | 0.870366  | -0.939074 | 3.890859  | H | 3.815938  | 2.286609  | -0.361996 |
| H | -0.649128 | -1.062740 | 4.772901  | H | 2.999923  | 1.808304  | 1.115638  |
| H | -3.009307 | -0.666443 | 1.966479  | H | 2.367264  | 0.743393  | -1.675665 |
| H | -2.798973 | -1.005167 | 3.682917  | H | 0.011165  | 0.412302  | -1.624839 |
| H | -2.387763 | -2.236287 | 2.488003  | H | -1.699511 | 1.747323  | 0.037326  |
| H | 1.492863  | 0.228853  | 2.016698  | H | -2.526999 | 3.497621  | -1.479547 |
| H | 1.978169  | -1.355921 | 1.393283  | H | -2.064956 | 2.058228  | -2.394399 |
| H | 2.992181  | -1.524003 | -2.176494 | H | -3.772542 | 2.405863  | -2.100637 |
| H | 4.787102  | -3.204421 | -2.046957 | H | -3.342111 | 3.312264  | 0.900121  |
| H | 6.548233  | -3.009555 | -0.314057 | H | -3.642847 | 1.731273  | 1.632603  |
| H | 6.496609  | -1.115965 | 1.279494  | H | -4.683129 | 2.317588  | 0.330062  |
| H | 4.714942  | 0.559823  | 1.154406  | H | -5.056992 | 0.626241  | -1.145513 |

$\omega$ B97X energy = -1392.87521777 a.u.

(5R,1'S)-**5b**, Conf. B

|   |           |           |           |   |           |           |           |
|---|-----------|-----------|-----------|---|-----------|-----------|-----------|
| C | 1.564421  | 3.445300  | -1.505488 | H | -5.640494 | -1.705960 | -1.652837 |
| C | 0.579477  | 4.391721  | -1.745120 | H | -3.925655 | -3.465092 | -1.524438 |
| C | -0.205737 | 4.862157  | -0.699273 | H | -0.359961 | -2.837423 | -0.612154 |
| C | 0.001208  | 4.379648  | 0.584128  | H | -0.860434 | -5.132730 | 0.116020  |
| C | 0.992364  | 3.434162  | 0.820309  | H | -1.733382 | -3.995172 | 1.151726  |
| C | 1.783663  | 2.953943  | -0.218211 | H | -2.590621 | -4.867098 | -0.118774 |
| C | 2.863492  | 1.930912  | 0.038964  | H | -0.386736 | -4.574798 | -2.306393 |
| C | 2.577804  | 0.574384  | -0.617335 | H | -0.949032 | -3.048818 | -3.005241 |
| N | 1.351937  | -0.026087 | -0.070894 | H | -2.106884 | -4.325228 | -2.610099 |
| C | 0.178717  | -0.000405 | -0.636969 | H | -0.317261 | -2.165709 | 1.315079  |
| N | -0.785136 | -0.538378 | 0.079164  | H | -1.270581 | 1.438408  | 2.054933  |
| C | -2.091082 | -0.835315 | -0.462849 | H | -1.390688 | 1.147902  | 3.789421  |
| C | -3.029995 | 0.196423  | -0.600183 | H | 0.189681  | 1.231188  | 3.028845  |
| C | -2.717720 | 1.662428  | -0.347047 | H | -0.230840 | -2.430940 | 3.695734  |
| C | -2.773515 | 2.449629  | -1.659953 | H | 0.886237  | -1.066500 | 3.860936  |
| C | -3.652645 | 2.285491  | 0.691478  | H | -0.625911 | -1.080676 | 4.763837  |
| C | -4.306067 | -0.147969 | -1.036446 | H | -2.993844 | -0.546869 | 1.987291  |
| C | -4.635113 | -1.458728 | -1.331948 | H | -2.782820 | -0.901273 | 3.700097  |
|   |           |           |           | H | -2.463680 | -2.152956 | 2.497994  |
|   |           |           |           | H | 1.574208  | 0.018453  | 2.019386  |
|   |           |           |           | H | 1.932221  | -1.541015 | 1.264978  |
|   |           |           |           | H | 2.990992  | -1.541438 | -2.219775 |

|   |          |           |           |
|---|----------|-----------|-----------|
| H | 4.771490 | -3.240302 | -2.112721 |
| H | 6.514523 | -3.102813 | -0.356349 |
| H | 6.459592 | -1.249847 | 1.283909  |
| H | 4.691550 | 0.442819  | 1.181483  |

ωB97X energy = -1392.87510317 a.u.

(5*R*,1'*S*)-**5b**, Conf. C

|   |           |           |           |
|---|-----------|-----------|-----------|
| C | -4.387035 | 2.600430  | 0.428926  |
| C | -5.744505 | 2.885808  | 0.462250  |
| C | -6.605945 | 2.277233  | -0.441449 |
| C | -6.101260 | 1.384833  | -1.377206 |
| C | -4.742156 | 1.100768  | -1.407184 |
| C | -3.872070 | 1.704011  | -0.504565 |
| C | -2.398526 | 1.377597  | -0.508834 |
| C | -2.048747 | 0.380321  | 0.603270  |
| N | -0.598062 | 0.209530  | 0.733163  |
| C | 0.335578  | 0.521748  | -0.119595 |
| N | 1.543073  | 0.128414  | 0.227530  |
| C | 2.734470  | 0.571774  | -0.459806 |
| C | 3.056592  | 0.015482  | -1.706180 |
| C | 2.164477  | -0.965615 | -2.448614 |
| C | 1.576680  | -0.314653 | -3.704173 |
| C | 2.898672  | -2.259491 | -2.806074 |
| C | 4.244133  | 0.421901  | -2.306812 |
| C | 5.078434  | 1.342190  | -1.698174 |
| C | 4.712859  | 1.913231  | -0.492308 |
| C | 3.524363  | 1.562332  | 0.140443  |
| C | 3.123526  | 2.300470  | 1.408038  |
| C | 4.085539  | 2.012430  | 2.562764  |
| C | 3.018538  | 3.806570  | 1.152516  |
| C | 1.493239  | -0.583033 | 1.543373  |
| C | 2.054843  | -2.023207 | 1.583500  |
| C | 3.550830  | -2.027354 | 1.251807  |
| C | 1.316154  | -2.976494 | 0.643385  |
| C | 1.892998  | -2.507231 | 3.031754  |
| C | -0.012930 | -0.478944 | 1.889161  |
| C | -2.716042 | -0.970308 | 0.416096  |
| C | -2.331712 | -1.812028 | -0.624064 |
| C | -2.961901 | -3.033028 | -0.808184 |
| C | -3.986672 | -3.422787 | 0.045913  |
| C | -4.373871 | -2.588376 | 1.083927  |
| C | -3.737227 | -1.367359 | 1.269743  |
| H | -3.718475 | 3.085746  | 1.133853  |
| H | -6.129448 | 3.588668  | 1.192375  |
| H | -7.666560 | 2.499805  | -0.417546 |
| H | -6.766803 | 0.908118  | -2.087893 |
| H | -4.353560 | 0.400677  | -2.140161 |
| H | -2.121438 | 0.962290  | -1.481466 |
| H | -1.822361 | 2.294176  | -0.356248 |
| H | -2.379416 | 0.801462  | 1.556629  |
| H | 0.150721  | 1.070145  | -1.034179 |
| H | 1.328498  | -1.233903 | -1.801956 |
| H | 2.365426  | -0.053133 | -4.413852 |
| H | 0.891375  | -1.004364 | -4.201423 |
| H | 1.028151  | 0.599942  | -3.466397 |

|   |           |           |           |
|---|-----------|-----------|-----------|
| H | 2.204163  | -2.968221 | -3.262380 |
| H | 3.336147  | -2.733654 | -1.924767 |
| H | 3.702144  | -2.075033 | -3.522493 |
| H | 4.520317  | 0.006491  | -3.269359 |
| H | 6.006740  | 1.632152  | -2.176578 |
| H | 5.353518  | 2.663517  | -0.042693 |
| H | 2.126683  | 1.971396  | 1.705380  |
| H | 3.745029  | 2.511339  | 3.472427  |
| H | 4.164935  | 0.942561  | 2.771124  |
| H | 5.088998  | 2.379909  | 2.334498  |
| H | 2.652899  | 4.310984  | 2.049463  |
| H | 2.328372  | 4.021609  | 0.334142  |
| H | 3.989799  | 4.238036  | 0.900430  |
| H | 2.076156  | 0.003965  | 2.254156  |
| H | 4.102118  | -1.330523 | 1.889274  |
| H | 3.957381  | -3.026384 | 1.423170  |
| H | 3.749524  | -1.763690 | 0.212962  |
| H | 0.247422  | -3.042238 | 0.862377  |
| H | 1.430100  | -2.687888 | -0.401985 |
| H | 1.729750  | -3.981444 | 0.751029  |
| H | 2.407612  | -1.842018 | 3.730494  |
| H | 2.329846  | -3.502374 | 3.133511  |
| H | 0.845896  | -2.577562 | 3.334461  |
| H | -0.486553 | -1.453565 | 2.002621  |
| H | -0.200113 | 0.105690  | 2.789862  |
| H | -1.534214 | -1.519511 | -1.301668 |
| H | -2.653796 | -3.681969 | -1.619721 |
| H | -4.479547 | -4.377258 | -0.097888 |
| H | -5.170068 | -2.887785 | 1.755539  |
| H | -4.040395 | -0.717102 | 2.084166  |

ωB97X energy = -1392.87282190 a.u.

(5*R*,1'*S*)-**5b**, Conf. D

|   |           |           |           |
|---|-----------|-----------|-----------|
| C | 4.525245  | -1.176015 | 0.310267  |
| C | 4.747051  | -2.491739 | 0.690705  |
| C | 4.007434  | -3.518338 | 0.116193  |
| C | 3.055968  | -3.221608 | -0.849639 |
| C | 2.839793  | -1.903228 | -1.231207 |
| C | 3.562771  | -0.866131 | -0.648478 |
| C | 3.264293  | 0.569222  | -1.002173 |
| C | 2.447106  | 1.281506  | 0.084411  |
| N | 1.230029  | 0.511922  | 0.407159  |
| C | 0.122460  | 0.523079  | -0.277081 |
| N | -0.824983 | -0.250837 | 0.205629  |
| C | -2.028573 | -0.550766 | -0.533599 |
| C | -3.038719 | 0.417157  | -0.623096 |
| C | -2.903442 | 1.823755  | -0.063022 |
| C | -2.793553 | 2.848268  | -1.196557 |
| C | -4.051404 | 2.183370  | 0.881988  |
| C | -4.203141 | 0.071670  | -1.302043 |
| C | -4.358266 | -1.180820 | -1.869360 |
| C | -3.325155 | -2.099377 | -1.810345 |
| C | -2.129100 | -1.797020 | -1.167066 |
| C | -0.985177 | -2.797664 | -1.234974 |
| C | -1.315162 | -4.096968 | -0.498234 |

|   |           |           |           |
|---|-----------|-----------|-----------|
| C | -0.595839 | -3.079580 | -2.688858 |
| C | -0.337854 | -0.950826 | 1.435655  |
| C | -1.173083 | -0.762349 | 2.723317  |
| C | -1.265914 | 0.698508  | 3.164068  |
| C | -0.470449 | -1.582079 | 3.815027  |
| C | -2.581408 | -1.336497 | 2.537975  |
| C | 1.117541  | -0.424050 | 1.533563  |
| C | 2.074746  | 2.723915  | -0.227289 |
| C | 1.504888  | 3.493654  | 0.788361  |
| C | 1.121664  | 4.802725  | 0.554413  |
| C | 1.307312  | 5.367266  | -0.703159 |
| C | 1.878507  | 4.613560  | -1.714774 |
| C | 2.260179  | 3.296125  | -1.479421 |
| H | 5.105406  | -0.379092 | 0.765703  |
| H | 5.499383  | -2.717299 | 1.437808  |
| H | 4.178511  | -4.546078 | 0.414714  |
| H | 2.482201  | -4.018619 | -1.310579 |
| H | 2.100556  | -1.678525 | -1.995507 |
| H | 4.192648  | 1.128628  | -1.139202 |
| H | 2.721829  | 0.601154  | -1.949988 |
| H | 3.027314  | 1.275412  | 1.010397  |
| H | -0.010786 | 1.116576  | -1.174045 |
| H | -1.977842 | 1.882308  | 0.510623  |
| H | -2.639288 | 3.848568  | -0.785743 |
| H | -1.959589 | 2.622937  | -1.866268 |
| H | -3.706603 | 2.866132  | -1.796870 |
| H | -3.875345 | 3.165170  | 1.326835  |
| H | -4.149899 | 1.457020  | 1.692000  |
| H | -5.005307 | 2.226642  | 0.351617  |
| H | -5.003132 | 0.798321  | -1.387726 |
| H | -5.280071 | -1.433653 | -2.380336 |
| H | -3.440500 | -3.062616 | -2.294691 |
| H | -0.103863 | -2.358916 | -0.764360 |
| H | -0.461069 | -4.777331 | -0.531128 |
| H | -1.565598 | -3.917840 | 0.550295  |
| H | -2.165851 | -4.602924 | -0.961064 |
| H | 0.275339  | -3.738789 | -2.721870 |
| H | -0.347166 | -2.156904 | -3.218123 |
| H | -1.405162 | -3.573362 | -3.231300 |
| H | -0.326803 | -2.020381 | 1.221780  |
| H | -1.780714 | 1.314750  | 2.426364  |
| H | -1.833786 | 0.760047  | 4.094817  |
| H | -0.286355 | 1.142691  | 3.355088  |
| H | -0.391118 | -2.634540 | 3.529380  |
| H | 0.533364  | -1.211517 | 4.034507  |
| H | -1.048192 | -1.527823 | 4.739594  |
| H | -3.176737 | -0.761567 | 1.828263  |
| H | -3.105353 | -1.325357 | 3.496077  |
| H | -2.545945 | -2.372687 | 2.189936  |
| H | 1.309026  | 0.110124  | 2.463800  |
| H | 1.856280  | -1.218807 | 1.429438  |
| H | 1.360240  | 3.062344  | 1.774298  |
| H | 0.682336  | 5.386772  | 1.354728  |
| H | 1.010632  | 6.393035  | -0.888511 |
| H | 2.030648  | 5.046586  | -2.696522 |
| H | 2.706721  | 2.729442  | -2.287166 |

$\omega$ B97X energy = -1392.87275048 a.u.

(5S,1'S)-8a, Conf. A

|   |           |           |           |
|---|-----------|-----------|-----------|
| C | -3.564335 | -0.788265 | 0.661573  |
| C | -4.664802 | -1.582070 | 0.362739  |
| C | -5.635544 | -1.110238 | -0.513566 |
| C | -5.516780 | 0.141365  | -1.089458 |
| C | -4.411402 | 0.928784  | -0.787076 |
| C | -3.427313 | 0.485194  | 0.082433  |
| C | -2.194400 | 1.301028  | 0.418240  |
| C | -2.253814 | 2.775915  | 0.007243  |
| C | -1.014249 | 3.529989  | 0.421662  |
| C | -0.088687 | 3.954880  | -0.526973 |
| C | 1.065586  | 4.626081  | -0.143426 |
| C | 1.310663  | 4.877128  | 1.198775  |
| C | 0.391911  | 4.460236  | 2.153978  |
| C | -0.761488 | 3.793223  | 1.766848  |
| N | -1.014963 | 0.656647  | -0.173263 |
| C | 0.009886  | 0.198322  | 0.484711  |
| N | 0.890390  | -0.437262 | -0.259358 |
| C | 2.199554  | -0.823332 | 0.209756  |
| C | 3.311992  | -0.116891 | -0.269110 |
| C | 3.208715  | 1.135819  | -1.126098 |
| C | 3.887564  | 2.321668  | -0.434986 |
| C | 3.793727  | 0.918938  | -2.523745 |
| C | 4.574887  | -0.565791 | 0.104874  |
| C | 4.728530  | -1.637701 | 0.965176  |
| C | 3.612902  | -2.265401 | 1.489300  |
| C | 2.326717  | -1.876151 | 1.128251  |
| C | 1.147544  | -2.580187 | 1.781868  |
| C | 1.174370  | -4.093339 | 1.555972  |
| C | 1.102815  | -2.258752 | 3.279268  |
| C | 0.404205  | -0.504737 | -1.673398 |
| C | 0.131638  | -1.922826 | -2.228033 |
| C | -0.946971 | -2.662939 | -1.434779 |
| C | 1.422194  | -2.748001 | -2.246222 |
| C | -0.330406 | -1.745978 | -3.681163 |
| C | -0.845800 | 0.406279  | -1.607781 |
| C | -2.671914 | -2.434404 | 2.140825  |
| O | -2.566798 | -1.166932 | 1.504698  |
| H | -4.776935 | -2.563254 | 0.803680  |
| H | -6.490201 | -1.736984 | -0.740710 |
| H | -6.273605 | 0.508368  | -1.771618 |
| H | -4.325529 | 1.907406  | -1.243386 |
| H | -2.036373 | 1.249491  | 1.497488  |
| H | -2.390204 | 2.865644  | -1.072743 |
| H | -3.138142 | 3.212204  | 0.477362  |
| H | -0.276933 | 3.772358  | -1.580827 |
| H | 1.773263  | 4.954348  | -0.896330 |
| H | 2.211462  | 5.399438  | 1.500096  |
| H | 0.571653  | 4.659595  | 3.204329  |
| H | -1.478711 | 3.480946  | 2.520103  |
| H | 0.134396  | 0.337258  | 1.551644  |
| H | 2.155994  | 1.405950  | -1.231355 |

|                                            |           |           |           |   |           |           |           |
|--------------------------------------------|-----------|-----------|-----------|---|-----------|-----------|-----------|
| H                                          | 3.756264  | 3.226140  | -1.033094 | C | 1.400067  | 4.115962  | -1.785004 |
| H                                          | 3.455349  | 2.503801  | 0.551452  | C | 3.015749  | 3.278171  | 0.740797  |
| H                                          | 4.959951  | 2.153639  | -0.313808 | C | 3.972598  | 2.611421  | 1.484904  |
| H                                          | 4.864577  | 0.708541  | -2.467175 | C | 3.859139  | 1.248019  | 1.689223  |
| H                                          | 3.659920  | 1.815227  | -3.132941 | C | 2.826168  | 0.512992  | 1.115158  |
| H                                          | 3.319679  | 0.081116  | -3.041395 | C | 2.728515  | -0.969920 | 1.434902  |
| H                                          | 5.453691  | -0.052092 | -0.268370 | C | 3.985908  | -1.742629 | 1.031578  |
| H                                          | 5.720962  | -1.970309 | 1.246669  | C | 2.431797  | -1.171816 | 2.924479  |
| H                                          | 3.742659  | -3.078412 | 2.194656  | C | 0.708100  | 0.395758  | -1.869155 |
| H                                          | 0.224206  | -2.202328 | 1.339766  | C | 1.723392  | -0.509624 | -2.605164 |
| H                                          | 0.275767  | -4.549700 | 1.977865  | C | 1.367016  | -0.456388 | -4.097327 |
| H                                          | 1.212965  | -4.343676 | 0.493662  | C | 1.670073  | -1.958308 | -2.117515 |
| H                                          | 2.038390  | -4.552645 | 2.041385  | C | 3.141847  | 0.046647  | -2.446672 |
| H                                          | 0.250793  | -2.752619 | 3.752503  | C | -0.762134 | -0.069397 | -1.985297 |
| H                                          | 1.017516  | -1.184646 | 3.460080  | C | -2.286162 | 2.056771  | 2.648347  |
| H                                          | 2.007452  | -2.610449 | 3.780528  | O | -2.379633 | 1.061051  | 1.636138  |
| H                                          | 1.160445  | -0.049202 | -2.311957 | H | -4.470747 | 2.764954  | 1.679817  |
| H                                          | -0.649447 | -2.825413 | -0.397204 | H | -6.373457 | 2.658284  | 0.143247  |
| H                                          | -1.119598 | -3.643647 | -1.882890 | H | -6.480197 | 0.897328  | -1.603709 |
| H                                          | -1.904213 | -2.134149 | -1.434683 | H | -4.647173 | -0.750130 | -1.778132 |
| H                                          | 2.220476  | -2.225982 | -2.781577 | H | -2.683066 | -1.590164 | -1.170821 |
| H                                          | 1.784560  | -2.978171 | -1.244760 | H | -2.180656 | -1.415620 | 1.826990  |
| H                                          | 1.240629  | -3.694830 | -2.759189 | H | -3.364659 | -2.401100 | 0.997115  |
| H                                          | 0.420318  | -1.213137 | -4.271244 | H | -0.254398 | -2.564313 | 2.508313  |
| H                                          | -0.480011 | -2.726732 | -4.136508 | H | 1.454528  | -4.313118 | 2.196205  |
| H                                          | -1.274543 | -1.202822 | -3.759420 | H | 1.349281  | -5.818308 | 0.233582  |
| H                                          | -0.696162 | 1.352308  | -2.130062 | H | -0.495642 | -5.570874 | -1.402480 |
| H                                          | -1.739713 | -0.071290 | -2.005207 | H | -2.201029 | -3.832307 | -1.092887 |
| H                                          | -3.581017 | -2.498864 | 2.743009  | H | -0.289747 | -0.071429 | 1.286742  |
| H                                          | -1.803881 | -2.515653 | 2.791028  | H | 0.075290  | 2.713403  | -0.859887 |
| H                                          | -2.656699 | -3.244083 | 1.405847  | H | 0.925949  | 5.154192  | 0.745221  |
| $\omega$ B97X energy = -1507.41562724 a.u. |           |           |           | H | -0.620169 | 4.894396  | -0.067101 |
| (5S,1'S)-8a, Conf. B                       |           |           |           | H | -0.162668 | 3.882463  | 1.311854  |
| C                                          | -3.470734 | 1.061422  | 0.823228  | H | 1.857309  | 3.422778  | -2.495584 |
| C                                          | -4.498927 | 1.990679  | 0.925287  | H | 2.156859  | 4.854464  | -1.509770 |
| C                                          | -5.578735 | 1.926898  | 0.052474  | H | 0.589822  | 4.640850  | -2.295421 |
| C                                          | -5.640971 | 0.946104  | -0.920920 | H | 3.085960  | 4.353799  | 0.623405  |
| C                                          | -4.607460 | 0.022223  | -1.016591 | H | 4.795490  | 3.159730  | 1.928622  |
| C                                          | -3.519000 | 0.057477  | -0.156912 | H | 4.589443  | 0.740005  | 2.308988  |
| C                                          | -2.438052 | -0.997853 | -0.286857 | H | 1.893063  | -1.397453 | 0.879211  |
| C                                          | -2.367220 | -1.964764 | 0.902808  | H | 3.841684  | -2.809109 | 1.221210  |
| C                                          | -1.337377 | -3.056424 | 0.721393  | H | 4.217651  | -1.616885 | -0.028018 |
| C                                          | -0.303754 | -3.213872 | 1.639012  | H | 4.854702  | -1.416424 | 1.607899  |
| C                                          | 0.658785  | -4.202223 | 1.467380  | H | 2.316582  | -2.235176 | 3.146681  |
| C                                          | 0.599268  | -5.047920 | 0.370396  | H | 1.515903  | -0.658382 | 3.228335  |
| C                                          | -0.434814 | -4.906911 | -0.547612 | H | 3.247699  | -0.789071 | 3.542075  |
| C                                          | -1.394548 | -3.921751 | -0.371322 | H | 0.817640  | 1.400632  | -2.276473 |
| N                                          | -1.130358 | -0.410235 | -0.607845 | H | 0.386244  | -0.885653 | -4.311589 |
| C                                          | -0.196698 | -0.017388 | 0.211807  | H | 2.102957  | -1.027485 | -4.666510 |
| N                                          | 0.868599  | 0.477920  | -0.383669 | H | 1.379265  | 0.571572  | -4.469912 |
| C                                          | 1.905828  | 1.202500  | 0.312330  | H | 1.944550  | -2.047236 | -1.064832 |
| C                                          | 1.950618  | 2.596120  | 0.161231  | H | 0.681312  | -2.406938 | -2.244545 |
| C                                          | 0.866450  | 3.395660  | -0.545013 | H | 2.375744  | -2.562948 | -2.691302 |
| C                                          | 0.216152  | 4.389703  | 0.421575  | H | 3.494755  | 0.006225  | -1.416647 |
|                                            |           |           |           | H | 3.832388  | -0.538753 | -3.057741 |
|                                            |           |           |           | H | 3.198408  | 1.086136  | -2.782132 |

|   |           |           |           |
|---|-----------|-----------|-----------|
| H | -1.425444 | 0.714926  | -2.354987 |
| H | -0.876243 | -0.948531 | -2.617760 |
| H | -2.292411 | 3.059429  | 2.213747  |
| H | -1.336747 | 1.884421  | 3.150298  |
| H | -3.101962 | 1.961192  | 3.368491  |

ωB97X energy = -1507.41347711 a.u.

(5S,1'S)-8a, Conf. C

|   |           |           |           |
|---|-----------|-----------|-----------|
| C | 1.785019  | 3.114532  | 0.207898  |
| C | 1.572842  | 4.437705  | -0.154470 |
| C | 1.834367  | 4.841416  | -1.459581 |
| C | 2.304758  | 3.939439  | -2.395831 |
| C | 2.516350  | 2.615355  | -2.024383 |
| C | 2.262619  | 2.184181  | -0.732277 |
| C | 2.477996  | 0.754434  | -0.274100 |
| C | 3.187485  | -0.155737 | -1.281923 |
| C | 3.399185  | -1.547082 | -0.738042 |
| C | 2.602318  | -2.607706 | -1.158130 |
| C | 2.770851  | -3.878114 | -0.620586 |
| C | 3.740181  | -4.101607 | 0.346410  |
| C | 4.545471  | -3.050206 | 0.768225  |
| C | 4.375954  | -1.784066 | 0.227993  |
| C | 1.192720  | 0.166988  | 0.147503  |
| N | 0.089764  | 0.177691  | -0.538631 |
| C | -0.944000 | -0.362404 | 0.078407  |
| N | -2.293604 | -0.131686 | -0.385253 |
| C | -2.974931 | 1.002490  | 0.078008  |
| C | -2.321099 | 2.088488  | 0.920459  |
| C | -2.299183 | 3.415313  | 0.155011  |
| C | -3.004101 | 2.250142  | 2.279592  |
| C | -4.301134 | 1.162702  | -0.311678 |
| C | -4.909700 | 0.258661  | -1.164660 |
| C | -4.189438 | -0.809111 | -1.670491 |
| C | -2.865951 | -1.025660 | -1.299121 |
| C | -2.097196 | -2.170098 | -1.936246 |
| C | -2.789865 | -3.518836 | -1.732723 |
| C | -1.871413 | -1.899477 | -3.426933 |
| C | -0.557894 | -0.694487 | 1.488173  |
| C | -0.997289 | -2.058689 | 2.061194  |
| C | -2.525493 | -2.132862 | 2.144411  |
| C | -0.441642 | -2.117168 | 3.491560  |
| C | -0.463422 | -3.250053 | 1.266797  |
| C | 0.973719  | -0.479837 | 1.444128  |
| C | 1.122156  | 3.519755  | 2.468883  |
| C | 1.552518  | 2.622719  | 1.453095  |
| O | 1.208153  | 5.158697  | 0.564941  |
| H | 1.665652  | 5.876128  | -1.734645 |
| H | 2.509019  | 4.255689  | -3.411268 |
| H | 2.889154  | 1.916120  | -2.763012 |
| H | 3.069064  | 0.782243  | 0.644116  |
| H | 2.608014  | -0.207223 | -2.207135 |
| H | 4.148612  | 0.302807  | -1.525165 |
| H | 1.842610  | -2.441914 | -1.916744 |
| H | 2.140525  | -4.693209 | -0.958126 |
| H | 3.872421  | -5.091459 | 0.767761  |

|   |           |           |           |
|---|-----------|-----------|-----------|
| H | 5.310521  | -3.218618 | 1.517608  |
| H | 5.013611  | -0.969305 | 0.558254  |
| H | 0.008720  | 0.619231  | -1.525280 |
| H | -1.277694 | 1.822219  | 1.102363  |
| H | -1.780508 | 4.179999  | 0.738845  |
| H | -1.782052 | 3.311318  | -0.801864 |
| H | -3.310616 | 3.777680  | -0.042257 |
| H | -3.012584 | 1.312993  | 2.841796  |
| H | -4.039725 | 2.577761  | 2.161719  |
| H | -2.482769 | 3.000675  | 2.878105  |
| H | -4.860705 | 2.021456  | 0.042095  |
| H | -5.943727 | 0.402019  | -1.456392 |
| H | -4.662419 | -1.486629 | -2.372559 |
| H | -1.114081 | -2.222912 | -1.466513 |
| H | -2.167260 | -4.322730 | -2.131725 |
| H | -2.973158 | -3.725129 | -0.675867 |
| H | -3.749803 | -3.554062 | -2.252931 |
| H | -1.277811 | -2.702493 | -3.869578 |
| H | -1.344278 | -0.956553 | -3.588778 |
| H | -2.822316 | -1.848579 | -3.963346 |
| H | -1.014676 | 0.069267  | 2.123923  |
| H | -2.996070 | -2.160011 | 1.161155  |
| H | -2.933915 | -1.278113 | 2.691091  |
| H | -2.816978 | -3.040250 | 2.677777  |
| H | 0.650879  | -2.113965 | 3.509802  |
| H | -0.798040 | -1.274678 | 4.090726  |
| H | -0.775522 | -3.037344 | 3.974723  |
| H | -0.808228 | -4.175869 | 1.732721  |
| H | -0.820153 | -3.247922 | 0.236744  |
| H | 0.627825  | -3.285055 | 1.244534  |
| H | 1.327995  | 0.176160  | 2.237518  |
| H | 1.529095  | -1.418851 | 1.473546  |
| H | 1.859425  | 4.309063  | 2.633394  |
| H | 1.020628  | 2.922535  | 3.371837  |
| H | 0.155907  | 3.966059  | 2.217857  |

ωB97X energy = -1507.41283784 a.u.

(5S,1'S)-8a, Conf. D

|   |           |           |           |
|---|-----------|-----------|-----------|
| C | -3.471835 | -1.120648 | 0.217980  |
| C | -4.211374 | -2.225983 | -0.180364 |
| C | -4.713524 | -2.286357 | -1.475708 |
| C | -4.484254 | -1.255740 | -2.367876 |
| C | -3.739027 | -0.152896 | -1.962224 |
| C | -3.221980 | -0.066362 | -0.679222 |
| C | -2.395913 | 1.111778  | -0.193680 |
| C | -2.281356 | 2.277110  | -1.183074 |
| C | -1.383111 | 3.380386  | -0.678570 |
| C | -1.785846 | 4.207678  | 0.368648  |
| C | -0.942824 | 5.197817  | 0.852645  |
| C | 0.316211  | 5.378523  | 0.292409  |
| C | 0.724050  | 4.564960  | -0.754575 |
| C | -0.121301 | 3.572423  | -1.234307 |
| N | -1.058518 | 0.648342  | 0.218024  |
| C | -0.231407 | -0.037913 | -0.510649 |
| N | 0.898472  | -0.352519 | 0.094818  |

|   |           |           |           |
|---|-----------|-----------|-----------|
| C | 1.772067  | -1.375139 | -0.434724 |
| C | 2.793848  | -1.010354 | -1.320701 |
| C | 2.959098  | 0.398867  | -1.862682 |
| C | 4.364857  | 0.952985  | -1.625011 |
| C | 2.605769  | 0.443445  | -3.352397 |
| C | 3.656725  | -2.010579 | -1.757969 |
| C | 3.501740  | -3.321408 | -1.342225 |
| C | 2.446757  | -3.666053 | -0.515367 |
| C | 1.546258  | -2.707350 | -0.061289 |
| C | 0.342112  | -3.156663 | 0.754029  |
| C | -0.539129 | -4.102715 | -0.067345 |
| C | 0.756114  | -3.801147 | 2.078110  |
| C | 0.816817  | 0.057925  | 1.534441  |
| C | 2.040530  | 0.755045  | 2.165751  |
| C | 2.420174  | 2.059125  | 1.465051  |
| C | 3.244539  | -0.192598 | 2.185177  |
| C | 1.652381  | 1.058622  | 3.620397  |
| C | -0.473439 | 0.910422  | 1.535030  |
| C | -3.146756 | -2.011746 | 2.412084  |
| O | -2.942965 | -0.974618 | 1.460908  |
| H | -4.405051 | -3.039416 | 0.505925  |
| H | -5.289966 | -3.152903 | -1.778406 |
| H | -4.878646 | -1.301334 | -3.375480 |
| H | -3.566976 | 0.649024  | -2.669458 |
| H | -2.843791 | 1.482247  | 0.731259  |
| H | -1.895167 | 1.912159  | -2.137783 |
| H | -3.287604 | 2.660628  | -1.366810 |
| H | -2.770207 | 4.079548  | 0.808938  |
| H | -1.271608 | 5.834815  | 1.665911  |
| H | 0.974068  | 6.153274  | 0.669029  |
| H | 1.702924  | 4.700547  | -1.200685 |
| H | 0.204014  | 2.943576  | -2.058393 |
| H | -0.453556 | -0.353202 | -1.523931 |
| H | 2.250969  | 1.047790  | -1.345711 |
| H | 4.417075  | 1.993611  | -1.953142 |
| H | 4.641455  | 0.916705  | -0.568911 |
| H | 5.113312  | 0.390473  | -2.187924 |
| H | 1.589147  | 0.087057  | -3.534435 |
| H | 3.288505  | -0.179410 | -3.935949 |
| H | 2.680389  | 1.466975  | -3.726777 |
| H | 4.460499  | -1.758529 | -2.440644 |
| H | 4.192365  | -4.083302 | -1.684853 |
| H | 2.307880  | -4.704036 | -0.234127 |
| H | -0.275896 | -2.286994 | 0.987072  |
| H | -1.431924 | -4.375942 | 0.501148  |
| H | -0.861624 | -3.633036 | -0.999571 |
| H | -0.009475 | -5.024997 | -0.316619 |
| H | -0.127946 | -4.066182 | 2.662705  |
| H | 1.372299  | -3.128143 | 2.679642  |
| H | 1.329299  | -4.715544 | 1.907893  |
| H | 0.649656  | -0.857371 | 2.109585  |
| H | 2.678196  | 1.900045  | 0.418109  |
| H | 3.293492  | 2.491962  | 1.958119  |
| H | 1.623785  | 2.805616  | 1.503205  |
| H | 2.988956  | -1.150553 | 2.647155  |
| H | 3.633811  | -0.392550 | 1.186484  |

|   |           |           |          |
|---|-----------|-----------|----------|
| H | 4.049799  | 0.255531  | 2.771283 |
| H | 1.368872  | 0.147226  | 4.154118 |
| H | 2.504614  | 1.500783  | 4.139906 |
| H | 0.823517  | 1.767510  | 3.686508 |
| H | -1.177271 | 0.608077  | 2.308077 |
| H | -0.269448 | 1.978531  | 1.627741 |
| H | -4.210037 | -2.154428 | 2.618005 |
| H | -2.640405 | -1.689812 | 3.318926 |
| H | -2.710075 | -2.952600 | 2.064951 |

ωB97X energy = -1507.41273029 a.u.

(5S,1'S)-**8a**, Conf. E

|   |           |           |           |
|---|-----------|-----------|-----------|
| C | -2.163449 | 2.011795  | -0.359170 |
| C | -2.605760 | 3.267712  | 0.037182  |
| C | -3.421227 | 3.385824  | 1.156507  |
| C | -3.795379 | 2.266380  | 1.878169  |
| C | -3.349724 | 1.013641  | 1.472153  |
| C | -2.541012 | 0.863266  | 0.356524  |
| C | -1.980458 | -0.471931 | -0.094662 |
| C | -2.732027 | -1.721705 | 0.372891  |
| C | -4.107095 | -1.842785 | -0.242041 |
| C | -5.252524 | -1.836284 | 0.547714  |
| C | -6.512275 | -1.960759 | -0.024423 |
| C | -6.642870 | -2.093666 | -1.398984 |
| C | -5.505706 | -2.107536 | -2.197083 |
| C | -4.249816 | -1.985032 | -1.621544 |
| N | -0.572362 | -0.549303 | 0.322589  |
| C | 0.461753  | -0.465283 | -0.464858 |
| N | 1.613027  | -0.356843 | 0.166110  |
| C | 2.896369  | -0.535875 | -0.471699 |
| C | 3.401423  | 0.458809  | -1.322085 |
| C | 2.621638  | 1.694087  | -1.747889 |
| C | 3.341134  | 2.994015  | -1.380968 |
| C | 2.341069  | 1.648164  | -3.253753 |
| C | 4.679959  | 0.274829  | -1.840686 |
| C | 5.425523  | -0.850076 | -1.537654 |
| C | 4.880920  | -1.844206 | -0.745108 |
| C | 3.599548  | -1.722455 | -0.217101 |
| C | 3.013911  | -2.896579 | 0.552402  |
| C | 2.977203  | -4.152857 | -0.322789 |
| C | 3.777614  | -3.165651 | 1.850974  |
| C | 1.375937  | -0.272161 | 1.642265  |
| C | 1.794725  | 1.056706  | 2.313200  |
| C | 3.308242  | 1.256748  | 2.190404  |
| C | 1.462905  | 0.926389  | 3.806346  |
| C | 1.053191  | 2.259966  | 1.728019  |
| C | -0.137809 | -0.578781 | 1.723816  |
| C | -1.007390 | 2.913248  | -2.244546 |
| O | -1.347212 | 1.800719  | -1.425977 |
| H | -2.318194 | 4.155553  | -0.509522 |
| H | -3.760896 | 4.369274  | 1.460417  |
| H | -4.428624 | 2.359879  | 2.751708  |
| H | -3.644861 | 0.142499  | 2.044139  |
| H | -1.954585 | -0.475197 | -1.185119 |
| H | -2.127601 | -2.584793 | 0.081021  |

|                                            |           |           |           |   |           |           |           |
|--------------------------------------------|-----------|-----------|-----------|---|-----------|-----------|-----------|
| H                                          | -2.807332 | -1.748808 | 1.461958  | C | 4.361007  | -2.577372 | 0.132303  |
| H                                          | -5.162139 | -1.739236 | 1.624886  | N | 0.523725  | -0.287789 | 0.758916  |
| H                                          | -7.392827 | -1.954907 | 0.608014  | C | -0.395897 | -0.408797 | -0.154567 |
| H                                          | -7.624712 | -2.191525 | -1.847614 | N | -1.616685 | -0.158735 | 0.270200  |
| H                                          | -5.597347 | -2.221105 | -3.271309 | C | -2.756934 | -0.091413 | -0.612133 |
| H                                          | -3.368955 | -2.013370 | -2.256111 | C | -3.261196 | -1.271089 | -1.180001 |
| H                                          | 0.381989  | -0.493805 | -1.544346 | C | -2.616492 | -2.636833 | -1.004125 |
| H                                          | 1.657439  | 1.698391  | -1.236359 | C | -3.598871 | -3.673334 | -0.454130 |
| H                                          | 2.724428  | 3.850692  | -1.662786 | C | -2.006581 | -3.119698 | -2.323518 |
| H                                          | 3.541602  | 3.061766  | -0.309937 | C | -4.398743 | -1.170287 | -1.975067 |
| H                                          | 4.293748  | 3.082358  | -1.908129 | C | -5.015887 | 0.048063  | -2.194901 |
| H                                          | 3.272450  | 1.623967  | -3.823883 | C | -4.472223 | 1.202662  | -1.661355 |
| H                                          | 1.789072  | 2.538362  | -3.562724 | C | -3.318915 | 1.164023  | -0.884017 |
| H                                          | 1.757225  | 0.766678  | -3.530733 | C | -2.707960 | 2.475744  | -0.416800 |
| H                                          | 5.099827  | 1.029004  | -2.496663 | C | -2.416882 | 3.396649  | -1.605417 |
| H                                          | 6.424516  | -0.963891 | -1.942346 | C | -3.599614 | 3.188092  | 0.603178  |
| H                                          | 5.453780  | -2.743760 | -0.549190 | C | -1.589773 | 0.208474  | 1.720874  |
| H                                          | 1.976878  | -2.670096 | 0.805059  | C | -2.388322 | -0.703164 | 2.682546  |
| H                                          | 2.479205  | -4.965071 | 0.211089  | C | -3.879635 | -0.683570 | 2.331700  |
| H                                          | 2.434928  | -3.971088 | -1.252899 | C | -2.230273 | -0.099115 | 4.085145  |
| H                                          | 3.984321  | -4.490203 | -0.577689 | C | -1.879812 | -2.145013 | 2.687678  |
| H                                          | 3.312968  | -3.987450 | 2.399728  | C | -0.065651 | 0.245229  | 1.991400  |
| H                                          | 3.798588  | -2.289157 | 2.503636  | C | 1.188474  | 2.514649  | -2.319373 |
| H                                          | 4.812989  | -3.444994 | 1.641473  | O | 1.447975  | 1.584726  | -1.275007 |
| H                                          | 1.942509  | -1.069404 | 2.121965  | H | 2.815535  | 3.902956  | -1.025230 |
| H                                          | 3.852267  | 0.401403  | 2.601040  | H | 4.460203  | 4.350693  | 0.733887  |
| H                                          | 3.606250  | 2.143577  | 2.754031  | H | 4.964948  | 2.631135  | 2.450256  |
| H                                          | 3.629797  | 1.395087  | 1.158933  | H | 3.791807  | 0.455582  | 2.369390  |
| H                                          | 0.391469  | 0.828573  | 3.992926  | H | 2.305505  | -0.971648 | 1.490772  |
| H                                          | 1.966847  | 0.062505  | 4.248396  | H | 1.778676  | -2.220159 | -0.561854 |
| H                                          | 1.805174  | 1.819531  | 4.332451  | H | 2.042867  | -0.766279 | -1.537144 |
| H                                          | -0.031500 | 2.177143  | 1.843724  | H | 4.252998  | -0.031557 | -2.091350 |
| H                                          | 1.364811  | 3.168962  | 2.246669  | H | 6.681866  | -0.464804 | -2.107785 |
| H                                          | 1.269884  | 2.398351  | 0.666979  | H | 7.634036  | -2.254710 | -0.684655 |
| H                                          | -0.341217 | -1.561922 | 2.149626  | H | 6.135823  | -3.612225 | 0.747104  |
| H                                          | -0.687673 | 0.168650  | 2.292972  | H | 3.708893  | -3.179228 | 0.758311  |
| H                                          | -1.903581 | 3.407540  | -2.626147 | H | -0.186844 | -0.683554 | -1.179356 |
| H                                          | -0.438016 | 2.507349  | -3.076786 | H | -1.801512 | -2.549936 | -0.285108 |
| H                                          | -0.393126 | 3.632233  | -1.694767 | H | -3.079314 | -4.614986 | -0.264065 |
| $\omega$ B97X energy = -1507.41180169 a.u. |           |           |           | H | -4.054574 | -3.342664 | 0.481729  |
| (5S,1'S)-8a, Conf. F                       |           |           |           | H | -4.401688 | -3.876463 | -1.166189 |
|                                            |           |           |           | H | -1.271243 | -2.410796 | -2.711963 |
|                                            |           |           |           | H | -2.778586 | -3.249339 | -3.085984 |
| C                                          | 2.370553  | 1.913713  | -0.330601 | H | -1.509509 | -4.081356 | -2.179632 |
| C                                          | 3.023610  | 3.139981  | -0.287370 | H | -4.812224 | -2.065050 | -2.426318 |
| C                                          | 3.956278  | 3.391297  | 0.712725  | H | -5.912565 | 0.100261  | -2.801539 |
| C                                          | 4.238820  | 2.434474  | 1.671222  | H | -4.940704 | 2.157889  | -1.869890 |
| C                                          | 3.576918  | 1.213673  | 1.622921  | H | -1.744726 | 2.265369  | 0.052017  |
| C                                          | 2.648132  | 0.931889  | 0.633060  | H | -1.877936 | 4.284050  | -1.265909 |
| C                                          | 1.976390  | -0.425619 | 0.602102  | H | -1.807739 | 2.892081  | -2.357944 |
| C                                          | 2.336519  | -1.281270 | -0.621902 | H | -3.338336 | 3.731692  | -2.086729 |
| C                                          | 3.816545  | -1.571131 | -0.661633 | H | -3.120608 | 4.106117  | 0.949852  |
| C                                          | 4.666209  | -0.816945 | -1.465692 | H | -3.808520 | 2.564042  | 1.475434  |
| C                                          | 6.033214  | -1.060104 | -1.475170 | H | -4.558428 | 3.458152  | 0.153629  |
| C                                          | 6.567086  | -2.063158 | -0.677512 | H | -2.004849 | 1.211743  | 1.816168  |
| C                                          | 5.727071  | -2.823285 | 0.125897  | H | -4.267512 | 0.338198  | 2.293904  |



|   |           |           |           |
|---|-----------|-----------|-----------|
| H | -4.439046 | -1.222820 | 3.099234  |
| H | -4.089471 | -1.158815 | 1.373660  |
| H | -1.195388 | -0.110683 | 4.433811  |
| H | -2.588556 | 0.933523  | 4.112345  |
| H | -2.821139 | -0.677674 | 4.797707  |
| H | -0.827962 | -2.218227 | 2.973326  |
| H | -2.452361 | -2.729335 | 3.411116  |
| H | -2.001782 | -2.622875 | 1.715026  |
| H | 0.302363  | 1.259138  | 2.156128  |
| H | 0.233381  | -0.373516 | 2.836203  |
| H | 0.757496  | 3.438613  | -1.925265 |
| H | 0.470594  | 2.030714  | -2.977667 |
| H | 2.100077  | 2.740120  | -2.877971 |

ωB97X energy = -1507.41152226 a.u.

(5*S*,1'*R*)-**8b**, Conf. A

|   |           |           |           |
|---|-----------|-----------|-----------|
| C | -3.752078 | -0.893765 | -0.784113 |
| C | -4.882518 | -1.664125 | -0.539941 |
| C | -5.833502 | -1.219515 | 0.371658  |
| C | -5.666757 | -0.017968 | 1.035987  |
| C | -4.532407 | 0.746552  | 0.786945  |
| C | -3.567135 | 0.328348  | -0.115104 |
| C | -2.310937 | 1.122638  | -0.406777 |
| C | -2.338437 | 2.582161  | 0.062262  |
| C | -1.088129 | 3.331710  | -0.327351 |
| C | -0.169216 | 3.731795  | 0.636991  |
| C | 0.996021  | 4.399679  | 0.278891  |
| C | 1.253130  | 4.679141  | -1.054832 |
| C | 0.340158  | 4.288347  | -2.027304 |
| C | -0.819641 | 3.619468  | -1.665450 |
| N | -1.149962 | 0.421077  | 0.156794  |
| C | -0.079552 | 0.086993  | -0.502741 |
| N | 0.849686  | -0.497631 | 0.224216  |
| C | 2.002740  | -1.143145 | -0.358560 |
| C | 1.969643  | -2.531538 | -0.549662 |
| C | 0.720080  | -3.375650 | -0.348870 |
| C | 0.327001  | -4.070208 | -1.656155 |
| C | 0.891391  | -4.400189 | 0.774576  |
| C | 3.130976  | -3.149757 | -1.002130 |
| C | 4.263761  | -2.413393 | -1.301016 |
| C | 4.241900  | -1.034964 | -1.184690 |
| C | 3.113599  | -0.367444 | -0.717564 |
| C | 3.129958  | 1.151706  | -0.675020 |
| C | 4.273841  | 1.697948  | 0.181852  |
| C | 3.206996  | 1.718455  | -2.096161 |
| C | 0.342863  | -0.704789 | 1.617380  |
| C | 1.260116  | -0.280767 | 2.786458  |
| C | 2.566421  | -1.082649 | 2.771103  |
| C | 0.502756  | -0.640109 | 4.072687  |
| C | 1.576134  | 1.215307  | 2.787413  |
| C | -1.014669 | 0.041973  | 1.566430  |
| C | -2.935808 | -2.437654 | -2.410274 |
| O | -2.770932 | -1.244005 | -1.655698 |
| H | -5.032049 | -2.606053 | -1.050252 |

|   |           |           |           |
|---|-----------|-----------|-----------|
| H | -6.712088 | -1.827090 | 0.555742  |
| H | -6.409402 | 0.327974  | 1.744232  |
| H | -4.409934 | 1.687918  | 1.308837  |
| H | -2.149970 | 1.112180  | -1.486818 |
| H | -3.216570 | 3.051693  | -0.387348 |
| H | -2.469681 | 2.633636  | 1.145293  |
| H | -0.370779 | 3.532461  | 1.684865  |
| H | 1.699945  | 4.704543  | 1.045317  |
| H | 2.159083  | 5.203476  | -1.337194 |
| H | 0.531187  | 4.508200  | -3.071598 |
| H | -1.531262 | 3.327542  | -2.432139 |
| H | 0.035534  | 0.261744  | -1.565749 |
| H | -0.111850 | -2.718669 | -0.087150 |
| H | -0.619467 | -4.600401 | -1.528157 |
| H | 0.208991  | -3.347357 | -2.466481 |
| H | 1.079655  | -4.800314 | -1.961707 |
| H | 1.686173  | -5.110779 | 0.535290  |
| H | -0.032868 | -4.964644 | 0.914269  |
| H | 1.144925  | -3.925133 | 1.725256  |
| H | 3.142245  | -4.224818 | -1.143063 |
| H | 5.158861  | -2.913622 | -1.652279 |
| H | 5.119576  | -0.462937 | -1.463985 |
| H | 2.193743  | 1.503525  | -0.237578 |
| H | 5.245493  | 1.477342  | -0.266292 |
| H | 4.186113  | 2.783862  | 0.267950  |
| H | 4.264434  | 1.276563  | 1.189406  |
| H | 3.180587  | 2.809647  | -2.067035 |
| H | 2.370444  | 1.375838  | -2.710421 |
| H | 4.133510  | 1.413172  | -2.588801 |
| H | 0.163108  | -1.776171 | 1.733109  |
| H | 3.104983  | -0.908592 | 3.705093  |
| H | 3.224464  | -0.795158 | 1.950953  |
| H | 2.376258  | -2.156401 | 2.691765  |
| H | -0.445858 | -0.104907 | 4.158736  |
| H | 0.297316  | -1.712776 | 4.123107  |
| H | 1.109954  | -0.373485 | 4.939956  |
| H | 0.695510  | 1.824595  | 2.999995  |
| H | 2.308594  | 1.429813  | 3.568501  |
| H | 1.996990  | 1.548476  | 1.837711  |
| H | -1.850030 | -0.590786 | 1.863726  |
| H | -1.019375 | 0.939197  | 2.187017  |
| H | -3.846195 | -2.398440 | -3.013322 |
| H | -2.963345 | -3.313960 | -1.757257 |
| H | -2.069741 | -2.500531 | -3.064493 |

ωB97X energy = -1507.41493765 a.u.

(5*S*,1'*R*)-**8b**, Conf. B

|   |          |           |           |
|---|----------|-----------|-----------|
| C | 3.288191 | -1.690497 | 0.135564  |
| C | 3.804450 | -2.918659 | -0.256231 |
| C | 4.116796 | -3.137437 | -1.593666 |
| C | 3.922797 | -2.143704 | -2.535150 |
| C | 3.406465 | -0.915284 | -2.134849 |
| C | 3.080995 | -0.670934 | -0.810218 |
| C | 2.507467 | 0.644253  | -0.323317 |
| C | 2.582293 | 1.801137  | -1.327874 |

|   |           |           |           |
|---|-----------|-----------|-----------|
| C | 1.988245  | 3.071076  | -0.770607 |
| C | 0.719371  | 3.491707  | -1.158990 |
| C | 0.139953  | 4.619669  | -0.590925 |
| C | 0.828702  | 5.345597  | 0.370564  |
| C | 2.102484  | 4.943260  | 0.753441  |
| C | 2.676390  | 3.814660  | 0.186256  |
| N | 1.118352  | 0.453036  | 0.136163  |
| C | 0.179503  | -0.174982 | -0.506966 |
| N | -0.969925 | -0.242130 | 0.133258  |
| C | -2.187405 | -0.667479 | -0.516742 |
| C | -2.425697 | -2.036644 | -0.699432 |
| C | -1.419538 | -3.118120 | -0.341815 |
| C | -2.011773 | -4.166970 | 0.601618  |
| C | -0.865030 | -3.780834 | -1.606574 |
| C | -3.635090 | -2.408964 | -1.278909 |
| C | -4.567171 | -1.462261 | -1.664967 |
| C | -4.284478 | -0.115216 | -1.522226 |
| C | -3.080952 | 0.312637  | -0.970805 |
| C | -2.773384 | 1.802170  | -0.943910 |
| C | -2.753881 | 2.377594  | -2.362631 |
| C | -3.749834 | 2.574579  | -0.055286 |
| C | -0.869893 | 0.488505  | 1.435896  |
| C | -1.304184 | -0.272467 | 2.708970  |
| C | -0.494699 | -1.546275 | 2.949994  |
| C | -2.796689 | -0.613605 | 2.648822  |
| C | -1.086536 | 0.696777  | 3.880060  |
| C | 0.617237  | 0.926979  | 1.430026  |
| C | 3.214410  | -2.346043 | 2.429409  |
| O | 2.951950  | -1.383727 | 1.415213  |
| H | 3.968672  | -3.706776 | 0.466131  |
| H | 4.518909  | -4.099208 | -1.890599 |
| H | 4.169181  | -2.314340 | -3.575792 |
| H | 3.264312  | -0.139844 | -2.877724 |
| H | 3.049297  | 0.933423  | 0.579657  |
| H | 3.633644  | 1.952255  | -1.583045 |
| H | 2.058710  | 1.529108  | -2.247346 |
| H | 0.177986  | 2.933814  | -1.918368 |
| H | -0.850296 | 4.933865  | -0.903394 |
| H | 0.378992  | 6.226022  | 0.814736  |
| H | 2.651190  | 5.511635  | 1.495768  |
| H | 3.672220  | 3.507409  | 0.491530  |
| H | 0.322128  | -0.606733 | -1.490784 |
| H | -0.577275 | -2.651857 | 0.170674  |
| H | -1.238296 | -4.875569 | 0.905799  |
| H | -2.428538 | -3.711574 | 1.502862  |
| H | -2.807660 | -4.734466 | 0.114080  |
| H | -1.657743 | -4.287495 | -2.162672 |
| H | -0.110904 | -4.524956 | -1.340838 |
| H | -0.402108 | -3.051478 | -2.275681 |
| H | -3.849752 | -3.460715 | -1.431394 |
| H | -5.508625 | -1.775274 | -2.101398 |
| H | -5.003713 | 0.619377  | -1.866858 |
| H | -1.769314 | 1.948090  | -0.542453 |
| H | -3.736882 | 2.313270  | -2.834501 |
| H | -2.468335 | 3.432336  | -2.335113 |
| H | -2.039930 | 1.845668  | -2.995662 |

|   |           |           |           |
|---|-----------|-----------|-----------|
| H | -3.757819 | 2.189911  | 0.967564  |
| H | -4.768959 | 2.507774  | -0.443688 |
| H | -3.473568 | 3.630823  | -0.018975 |
| H | -1.512049 | 1.368526  | 1.363948  |
| H | -0.813662 | -2.005442 | 3.888020  |
| H | 0.576322  | -1.349935 | 3.031637  |
| H | -0.643709 | -2.280798 | 2.158433  |
| H | -3.400305 | 0.277536  | 2.455007  |
| H | -3.025579 | -1.351039 | 1.878750  |
| H | -3.113461 | -1.027384 | 3.608718  |
| H | -1.641790 | 1.627308  | 3.733828  |
| H | -1.441021 | 0.236507  | 4.804228  |
| H | -0.032363 | 0.946322  | 4.021314  |
| H | 0.733779  | 2.008639  | 1.499939  |
| H | 1.201851  | 0.453458  | 2.218652  |
| H | 4.276716  | -2.598712 | 2.463677  |
| H | 2.622945  | -3.252095 | 2.274454  |
| H | 2.925129  | -1.879262 | 3.368063  |

$\omega$ B97X energy = -1507.41324842 a.u.

(5S,1'R)-**8b**, Conf. C

|   |           |           |           |
|---|-----------|-----------|-----------|
| C | 0.972063  | 3.358574  | -0.185949 |
| C | 0.435367  | 4.570766  | 0.228913  |
| C | 0.686639  | 5.030385  | 1.516949  |
| C | 1.466259  | 4.292314  | 2.387742  |
| C | 1.995018  | 3.076460  | 1.967595  |
| C | 1.759489  | 2.590259  | 0.690933  |
| C | 2.304385  | 1.262518  | 0.198968  |
| C | 3.289860  | 0.578754  | 1.156254  |
| C | 3.764415  | -0.754927 | 0.636404  |
| C | 3.208393  | -1.938564 | 1.114756  |
| C | 3.587705  | -3.165964 | 0.586564  |
| C | 4.536285  | -3.223999 | -0.425346 |
| C | 5.109008  | -2.049790 | -0.898300 |
| C | 4.725288  | -0.825273 | -0.369846 |
| N | 1.193146  | 0.350325  | -0.131416 |
| C | 0.045965  | 0.294468  | 0.477694  |
| N | -0.838944 | -0.494325 | -0.094473 |
| C | -2.076136 | -0.844759 | 0.560474  |
| C | -2.147679 | -2.055275 | 1.261998  |
| C | -0.946364 | -2.960096 | 1.489928  |
| C | -0.657739 | -3.109819 | 2.986312  |
| C | -1.123683 | -4.329714 | 0.831963  |
| C | -3.372789 | -2.404658 | 1.821450  |
| C | -4.466116 | -1.560775 | 1.731939  |
| C | -4.346217 | -0.335376 | 1.099481  |
| C | -3.151211 | 0.052306  | 0.501393  |
| C | -3.053291 | 1.428165  | -0.137101 |
| C | -4.138735 | 1.655431  | -1.190626 |
| C | -3.095972 | 2.525850  | 0.930523  |
| C | -0.211913 | -1.191818 | -1.260687 |
| C | -0.999819 | -1.238471 | -2.589718 |
| C | -1.256480 | 0.143986  | -3.190186 |
| C | -2.333797 | -1.970940 | -2.410305 |
| C | -0.134194 | -2.054712 | -3.560594 |

|   |           |           |           |
|---|-----------|-----------|-----------|
| C | 1.151322  | -0.462815 | -1.351699 |
| C | -0.001743 | 3.573177  | -2.352943 |
| O | 0.776839  | 2.829926  | -1.422562 |
| H | -0.174882 | 5.164393  | -0.438086 |
| H | 0.263083  | 5.977338  | 1.830965  |
| H | 1.664375  | 4.651495  | 3.390003  |
| H | 2.603896  | 2.505747  | 2.657458  |
| H | 2.805107  | 1.433383  | -0.757917 |
| H | 4.137312  | 1.252844  | 1.299998  |
| H | 2.812890  | 0.436498  | 2.128589  |
| H | 2.467351  | -1.900215 | 1.908241  |
| H | 3.142312  | -4.077653 | 0.969129  |
| H | 4.834074  | -4.180295 | -0.839584 |
| H | 5.858331  | -2.087835 | -1.680727 |
| H | 5.176711  | 0.087786  | -0.746286 |
| H | -0.170740 | 0.849643  | 1.382597  |
| H | -0.063375 | -2.489812 | 1.053517  |
| H | 0.253679  | -3.694010 | 3.133474  |
| H | -0.520262 | -2.136252 | 3.461752  |
| H | -1.472495 | -3.625733 | 3.499548  |
| H | -1.974194 | -4.863148 | 1.263290  |
| H | -0.231128 | -4.939853 | 0.986582  |
| H | -1.294096 | -4.244709 | -0.243875 |
| H | -3.466553 | -3.343495 | 2.355916  |
| H | -5.410465 | -1.849018 | 2.179090  |
| H | -5.197712 | 0.335181  | 1.070805  |
| H | -2.087110 | 1.507745  | -0.637737 |
| H | -3.977661 | 2.613085  | -1.691255 |
| H | -4.135004 | 0.870271  | -1.950069 |
| H | -5.132637 | 1.681570  | -0.738370 |
| H | -2.969850 | 3.506961  | 0.465878  |
| H | -2.303493 | 2.399074  | 1.672698  |
| H | -4.052782 | 2.521644  | 1.458880  |
| H | -0.047230 | -2.229223 | -0.958184 |
| H | -1.846614 | 0.035575  | -4.102580 |
| H | -0.332202 | 0.655628  | -3.464988 |
| H | -1.815126 | 0.789328  | -2.511679 |
| H | -2.195685 | -2.944446 | -1.932473 |
| H | -3.045581 | -1.399187 | -1.813898 |
| H | -2.784637 | -2.142716 | -3.390094 |
| H | 0.049353  | -3.061531 | -3.175864 |
| H | -0.648670 | -2.149696 | -4.518684 |
| H | 0.831070  | -1.579155 | -3.750961 |
| H | 1.990381  | -1.156049 | -1.374995 |
| H | 1.215277  | 0.209779  | -2.208509 |
| H | -0.002396 | 2.996794  | -3.274570 |
| H | 0.440730  | 4.554368  | -2.539161 |
| H | -1.028964 | 3.692493  | -1.995749 |

ωB97X energy = -1507.41302653 a.u.

(5*S*,1'*R*)-**8b**, Conf. D

|   |          |           |           |
|---|----------|-----------|-----------|
| C | 2.436912 | -1.650577 | -0.140541 |
| C | 3.137160 | -2.844274 | -0.006392 |
| C | 4.051959 | -2.998664 | 1.028634  |
| C | 4.270683 | -1.976437 | 1.934559  |

|   |           |           |           |
|---|-----------|-----------|-----------|
| C | 3.559380  | -0.790646 | 1.798982  |
| C | 2.644709  | -0.605403 | 0.773121  |
| C | 1.908496  | 0.714835  | 0.662495  |
| C | 2.245973  | 1.526690  | -0.596064 |
| C | 3.719338  | 1.845261  | -0.656587 |
| C | 4.246987  | 2.897010  | 0.087914  |
| C | 5.607606  | 3.170819  | 0.060717  |
| C | 6.458447  | 2.393620  | -0.714337 |
| C | 5.941022  | 1.344740  | -1.462450 |
| C | 4.579712  | 1.073728  | -1.432326 |
| N | 0.462312  | 0.503558  | 0.800796  |
| C | -0.465716 | 0.651800  | -0.098802 |
| N | -1.660531 | 0.248325  | 0.283933  |
| C | -2.870220 | 0.560476  | -0.440650 |
| C | -3.141907 | -0.093195 | -1.651563 |
| C | -2.172728 | -1.042612 | -2.337082 |
| C | -2.790206 | -2.418401 | -2.596215 |
| C | -1.662639 | -0.426078 | -3.643844 |
| C | -4.354510 | 0.180545  | -2.276492 |
| C | -5.260942 | 1.070308  | -1.728875 |
| C | -4.945312 | 1.744623  | -0.563144 |
| C | -3.737169 | 1.525736  | 0.091629  |
| C | -3.401803 | 2.375936  | 1.307469  |
| C | -3.401895 | 3.864105  | 0.946207  |
| C | -4.353675 | 2.101768  | 2.474027  |
| C | -1.583952 | -0.346633 | 1.654626  |
| C | -1.968624 | -1.840799 | 1.768665  |
| C | -1.819675 | -2.222645 | 3.248097  |
| C | -1.077008 | -2.743023 | 0.914068  |
| C | -3.436873 | -2.044004 | 1.381387  |
| C | -0.117916 | -0.032004 | 2.037427  |
| C | 1.328695  | -2.445472 | -2.097631 |
| O | 1.533357  | -1.420762 | -1.132819 |
| H | 2.981929  | -3.657517 | -0.701992 |
| H | 4.591849  | -3.934139 | 1.119008  |
| H | 4.983526  | -2.095792 | 2.741068  |
| H | 3.719868  | 0.015872  | 2.507498  |
| H | 2.193914  | 1.316934  | 1.529943  |
| H | 1.957942  | 0.967765  | -1.487416 |
| H | 1.671279  | 2.456609  | -0.572516 |
| H | 3.586286  | 3.512298  | 0.691460  |
| H | 6.003457  | 3.995506  | 0.642578  |
| H | 7.520969  | 2.607111  | -0.738183 |
| H | 6.598026  | 0.735905  | -2.073178 |
| H | 4.179082  | 0.252354  | -2.018756 |
| H | -0.288577 | 1.086174  | -1.073287 |
| H | -1.310415 | -1.189567 | -1.685094 |
| H | -2.038031 | -3.093556 | -3.011533 |
| H | -3.177974 | -2.868456 | -1.679910 |
| H | -3.610657 | -2.356010 | -3.314599 |
| H | -2.485667 | -0.257369 | -4.342139 |
| H | -0.949897 | -1.094620 | -4.132577 |
| H | -1.169427 | 0.533966  | -3.473593 |
| H | -4.593478 | -0.314233 | -3.211151 |
| H | -6.206762 | 1.255622  | -2.224605 |
| H | -5.642931 | 2.472329  | -0.164022 |

|   |           |           |           |
|---|-----------|-----------|-----------|
| H | -2.387156 | 2.141237  | 1.632336  |
| H | -4.398258 | 4.204362  | 0.655232  |
| H | -3.086008 | 4.456291  | 1.807792  |
| H | -2.717924 | 4.070110  | 0.120360  |
| H | -4.059616 | 2.686223  | 3.348325  |
| H | -4.360054 | 1.046065  | 2.757029  |
| H | -5.378160 | 2.379383  | 2.214335  |
| H | -2.263795 | 0.209207  | 2.299903  |
| H | -2.143025 | -3.255557 | 3.390539  |
| H | -2.441585 | -1.585928 | 3.883234  |
| H | -0.788388 | -2.152373 | 3.600152  |
| H | -1.187936 | -2.531873 | -0.150772 |
| H | -0.017846 | -2.650905 | 1.170065  |
| H | -1.357577 | -3.786453 | 1.071932  |
| H | -3.622780 | -1.839754 | 0.327194  |
| H | -3.723572 | -3.079955 | 1.575071  |
| H | -4.094698 | -1.400128 | 1.972024  |
| H | -0.037668 | 0.717654  | 2.825793  |
| H | 0.436221  | -0.917850 | 2.343304  |
| H | 0.910807  | -3.343742 | -1.634630 |
| H | 2.260062  | -2.693451 | -2.611704 |
| H | 0.619472  | -2.043637 | -2.817251 |

ωB97X energy = -1507.41301894 a.u.

(5S,1'S)-**9a**, Conf. A

|   |           |           |           |
|---|-----------|-----------|-----------|
| C | 0.609825  | 0.716313  | 1.547829  |
| C | -0.481330 | -0.381549 | 1.641503  |
| N | -0.830338 | -0.578478 | 0.198468  |
| C | -0.120885 | 0.237954  | -0.549249 |
| N | 0.719940  | 0.982155  | 0.110594  |
| C | -0.052656 | -1.629922 | 2.447330  |
| C | -1.196325 | -2.646715 | 2.520389  |
| C | 0.230108  | -1.136849 | 3.874209  |
| C | 1.200471  | -2.304289 | 1.886655  |
| C | 1.729028  | 1.869465  | -0.478153 |
| C | -1.953466 | -1.324866 | -0.319172 |
| C | -3.247002 | -0.849531 | -0.066403 |
| C | -4.316130 | -1.627856 | -0.500049 |
| C | -4.108612 | -2.802490 | -1.201019 |
| C | -2.821161 | -3.209219 | -1.504468 |
| C | -1.715716 | -2.482674 | -1.073838 |
| C | -0.326868 | -2.948264 | -1.477489 |
| C | -0.059154 | -4.400224 | -1.076981 |
| C | -0.106179 | -2.754520 | -2.980818 |
| C | -3.532234 | 0.484439  | 0.606570  |
| C | -4.369440 | 1.386141  | -0.304660 |
| C | -4.217512 | 0.300806  | 1.962530  |
| C | 1.487105  | 3.316360  | -0.037596 |
| C | 3.114139  | 1.308650  | -0.179609 |
| C | 4.060181  | 1.996527  | 0.558610  |
| C | 5.301643  | 1.407383  | 0.804699  |
| C | 5.593414  | 0.147096  | 0.331571  |
| C | 4.637144  | -0.552101 | -0.410923 |
| C | 3.407126  | 0.032480  | -0.670793 |

|   |           |           |           |
|---|-----------|-----------|-----------|
| C | 0.104052  | 3.792608  | -0.409198 |
| C | -0.882103 | 3.952762  | 0.559847  |
| C | -2.166121 | 4.350431  | 0.208778  |
| C | -2.479485 | 4.594923  | -1.120418 |
| C | -1.500680 | 4.446498  | -2.094956 |
| C | -0.219499 | 4.048945  | -1.740378 |
| O | 4.999741  | -1.787673 | -0.836027 |
| C | 4.041830  | -2.561030 | -1.543697 |
| H | 0.323067  | 1.625493  | 2.075027  |
| H | 1.577124  | 0.385756  | 1.926284  |
| H | -1.366701 | 0.024801  | 2.133384  |
| H | -0.231899 | 0.289249  | -1.625981 |
| H | -1.421536 | -3.092759 | 1.551382  |
| H | -2.111740 | -2.188101 | 2.904299  |
| H | -0.919023 | -3.454059 | 3.201617  |
| H | -0.647028 | -0.644467 | 4.302951  |
| H | 1.068634  | -0.438131 | 3.915909  |
| H | 0.481218  | -1.987852 | 4.509883  |
| H | 1.024408  | -2.735191 | 0.900882  |
| H | 2.050930  | -1.621900 | 1.811690  |
| H | 1.498514  | -3.119715 | 2.549052  |
| H | 1.566708  | 1.813812  | -1.557540 |
| H | -5.329828 | -1.297569 | -0.303052 |
| H | -4.955369 | -3.392310 | -1.532540 |
| H | -2.670523 | -4.111354 | -2.086632 |
| H | 0.405985  | -2.326695 | -0.961705 |
| H | 0.979579  | -4.660895 | -1.294037 |
| H | -0.234849 | -4.565518 | -0.011634 |
| H | -0.696745 | -5.089819 | -1.634461 |
| H | 0.916839  | -3.029328 | -3.249040 |
| H | -0.270809 | -1.718065 | -3.284739 |
| H | -0.787649 | -3.383027 | -3.559484 |
| H | -2.586788 | 1.006607  | 0.769916  |
| H | -4.512527 | 2.360885  | 0.166698  |
| H | -3.875525 | 1.545663  | -1.265856 |
| H | -5.356004 | 0.957076  | -0.493511 |
| H | -4.369562 | 1.269340  | 2.443649  |
| H | -3.627258 | -0.324835 | 2.636465  |
| H | -5.195322 | -0.172288 | 1.842769  |
| H | 2.243318  | 3.937113  | -0.522807 |
| H | 1.638297  | 3.414534  | 1.039792  |
| H | 3.855931  | 2.984790  | 0.949720  |
| H | 6.044212  | 1.946801  | 1.381109  |
| H | 6.551917  | -0.320369 | 0.523273  |
| H | 2.666005  | -0.494966 | -1.259308 |
| H | -0.644599 | 3.778909  | 1.605016  |
| H | -2.921244 | 4.471504  | 0.977514  |
| H | -3.481341 | 4.903730  | -1.396264 |
| H | -1.733963 | 4.644944  | -3.134893 |
| H | 0.541042  | 3.944565  | -2.508625 |
| H | 4.525120  | -3.509013 | -1.765497 |
| H | 3.152658  | -2.742839 | -0.930931 |
| H | 3.750132  | -2.074978 | -2.478865 |

ωB97X energy = -1507.41240571 a.u.

(5S,1'S)-**9a**, Conf. B

|   |           |           |           |
|---|-----------|-----------|-----------|
| C | 0.782831  | 0.157640  | 1.268926  |
| C | -0.543813 | -0.616293 | 1.477039  |
| N | -1.165973 | -0.508963 | 0.118785  |
| C | -0.349573 | 0.117672  | -0.700226 |
| N | 0.775894  | 0.488389  | -0.158944 |
| C | -0.362593 | -2.041325 | 2.050040  |
| C | 0.275292  | -1.871442 | 3.436393  |
| C | 0.537291  | -2.917289 | 1.177361  |
| C | -1.721408 | -2.723090 | 2.241865  |
| C | 1.898840  | 1.129315  | -0.851948 |
| C | -2.534755 | -0.819603 | -0.221586 |
| C | -2.803069 | -1.870633 | -1.110995 |
| C | -4.136708 | -2.180891 | -1.358657 |
| C | -5.162383 | -1.480095 | -0.749683 |
| C | -4.870667 | -0.414250 | 0.082554  |
| C | -3.555415 | -0.042409 | 0.343197  |
| C | -3.298270 | 1.206020  | 1.173298  |
| C | -3.975809 | 2.425426  | 0.542133  |
| C | -3.751896 | 1.028974  | 2.624127  |
| C | -1.725624 | -2.652620 | -1.844839 |
| C | -1.832600 | -4.158377 | -1.594788 |
| C | -1.769532 | -2.350856 | -3.346023 |
| C | 2.109116  | 2.553070  | -0.327249 |
| C | 3.113906  | 0.214866  | -0.777446 |
| C | 3.061891  | -1.007841 | -1.452769 |
| C | 4.133244  | -1.876195 | -1.386101 |
| C | 5.274190  | -1.554245 | -0.655115 |
| C | 5.326205  | -0.338514 | 0.012915  |
| C | 4.242228  | 0.542969  | -0.050142 |
| C | 0.866508  | 3.399061  | -0.457601 |
| C | 0.162878  | 3.806857  | 0.671892  |
| C | -0.997451 | 4.561392  | 0.553330  |
| C | -1.470509 | 4.916367  | -0.701462 |
| C | -0.773098 | 4.519688  | -1.835652 |
| C | 0.386835  | 3.768207  | -1.713270 |
| O | 6.379364  | 0.085556  | 0.754572  |
| C | 7.508024  | -0.770721 | 0.860506  |
| H | 0.819836  | 1.073274  | 1.859749  |
| H | 1.664965  | -0.439064 | 1.497619  |
| H | -1.181304 | -0.069435 | 2.172559  |
| H | -0.595855 | 0.312125  | -1.737533 |
| H | -0.348507 | -1.249149 | 4.083732  |
| H | 1.270343  | -1.423802 | 3.388454  |
| H | 0.379638  | -2.849046 | 3.910530  |
| H | 1.533702  | -2.490229 | 1.037952  |
| H | 0.103246  | -3.090872 | 0.192240  |
| H | 0.667172  | -3.891491 | 1.653318  |
| H | -2.393089 | -2.108068 | 2.847214  |
| H | -2.219977 | -2.936393 | 1.296439  |
| H | -1.579800 | -3.672194 | 2.763266  |
| H | 1.592134  | 1.193945  | -1.898255 |
| H | -4.375860 | -2.988636 | -2.041204 |
| H | -6.194051 | -1.749887 | -0.943561 |
| H | -5.681685 | 0.155280  | 0.522255  |
| H | -2.226405 | 1.415764  | 1.171472  |

|   |           |           |           |
|---|-----------|-----------|-----------|
| H | -3.726033 | 3.325118  | 1.108784  |
| H | -3.643541 | 2.573708  | -0.487728 |
| H | -5.063153 | 2.321284  | 0.540075  |
| H | -3.515163 | 1.922628  | 3.205487  |
| H | -3.269588 | 0.173569  | 3.103724  |
| H | -4.831935 | 0.870825  | 2.676674  |
| H | -0.749552 | -2.330020 | -1.480394 |
| H | -0.999938 | -4.676183 | -2.075866 |
| H | -1.807499 | -4.394620 | -0.528698 |
| H | -2.758816 | -4.564466 | -2.007309 |
| H | -0.958450 | -2.872251 | -3.858872 |
| H | -1.667037 | -1.281505 | -3.545579 |
| H | -2.713854 | -2.682908 | -3.784150 |
| H | 2.930644  | 2.992121  | -0.897959 |
| H | 2.426642  | 2.529290  | 0.717433  |
| H | 2.183300  | -1.275484 | -2.031011 |
| H | 4.093678  | -2.823225 | -1.911749 |
| H | 6.100346  | -2.251492 | -0.620236 |
| H | 4.326592  | 1.480570  | 0.485278  |
| H | 0.532187  | 3.544627  | 1.658819  |
| H | -1.530253 | 4.872789  | 1.444882  |
| H | -2.378007 | 5.501568  | -0.796582 |
| H | -1.131527 | 4.800520  | -2.819529 |
| H | 0.929398  | 3.472659  | -2.606545 |
| H | 8.221911  | -0.248887 | 1.492765  |
| H | 7.239027  | -1.722921 | 1.325494  |
| H | 7.957136  | -0.954868 | -0.119053 |

ωB97X energy = -1507.41179842 a.u.

(5*S*,1'*S*)-**9a**, Conf. C

|   |           |           |           |
|---|-----------|-----------|-----------|
| C | 0.567629  | 0.638263  | 1.523048  |
| C | -0.481450 | -0.499718 | 1.603200  |
| N | -0.894974 | -0.625092 | 0.169257  |
| C | -0.207214 | 0.217186  | -0.570774 |
| N | 0.654031  | 0.936535  | 0.090749  |
| C | 0.030276  | -1.783887 | 2.296051  |
| C | 1.270610  | -2.366835 | 1.617561  |
| C | -1.077106 | -2.841090 | 2.354995  |
| C | 0.374835  | -1.388933 | 3.739498  |
| C | 1.618630  | 1.879357  | -0.485635 |
| C | -2.043398 | -1.349092 | -0.324437 |
| C | -3.320183 | -0.899033 | 0.038734  |
| C | -4.412581 | -1.664915 | -0.356924 |
| C | -4.248733 | -2.800394 | -1.129820 |
| C | -2.983493 | -3.176082 | -1.544534 |
| C | -1.853774 | -2.463505 | -1.154515 |
| C | -0.497835 | -2.905223 | -1.680355 |
| C | -0.186102 | -4.361776 | -1.329384 |
| C | -0.409944 | -2.687966 | -3.194229 |
| C | -3.570310 | 0.401815  | 0.786261  |
| C | -4.468960 | 1.330628  | -0.035124 |
| C | -4.171203 | 0.157713  | 2.172337  |
| C | 1.310494  | 3.307675  | -0.025402 |
| C | 3.030703  | 1.389048  | -0.190105 |
| C | 3.921980  | 2.099733  | 0.608808  |

|   |           |           |           |
|---|-----------|-----------|-----------|
| C | 5.185787  | 1.581487  | 0.848875  |
| C | 5.581808  | 0.364153  | 0.313083  |
| C | 4.688367  | -0.346047 | -0.485528 |
| C | 3.420294  | 0.172732  | -0.731736 |
| C | -0.087254 | 3.739548  | -0.394696 |
| C | -1.066548 | 3.897647  | 0.581608  |
| C | -2.358434 | 4.275567  | 0.238066  |
| C | -2.687924 | 4.497756  | -1.091059 |
| C | -1.717375 | 4.346538  | -2.073420 |
| C | -0.427340 | 3.971870  | -1.726256 |
| O | 4.960480  | -1.542360 | -1.063495 |
| C | 6.246579  | -2.108456 | -0.851594 |
| H | 0.252150  | 1.527776  | 2.068352  |
| H | 1.548781  | 0.336355  | 1.888006  |
| H | -1.351745 | -0.158668 | 2.165183  |
| H | -0.351906 | 0.309541  | -1.640568 |
| H | 2.106248  | -1.662537 | 1.592431  |
| H | 1.064689  | -2.682653 | 0.594455  |
| H | 1.606149  | -3.246871 | 2.170122  |
| H | -1.338083 | -3.230141 | 1.370946  |
| H | -1.985664 | -2.437867 | 2.811137  |
| H | -0.742683 | -3.681945 | 2.966522  |
| H | 1.185907  | -0.659440 | 3.791912  |
| H | -0.495508 | -0.970381 | 4.252190  |
| H | 0.695074  | -2.274767 | 4.291146  |
| H | 1.462880  | 1.828790  | -1.565844 |
| H | -5.411618 | -1.354038 | -0.072599 |
| H | -5.113018 | -3.381140 | -1.430698 |
| H | -2.868426 | -4.043859 | -2.184202 |
| H | 0.273011  | -2.285535 | -1.221147 |
| H | 0.826414  | -4.613933 | -1.651969 |
| H | -0.254363 | -4.544317 | -0.254772 |
| H | -0.874313 | -5.045974 | -1.830747 |
| H | 0.584382  | -2.958331 | -3.556151 |
| H | -0.599316 | -1.646789 | -3.465112 |
| H | -1.139896 | -3.307689 | -3.720800 |
| H | -2.619901 | 0.925753  | 0.911659  |
| H | -4.592652 | 2.283934  | 0.482894  |
| H | -4.034419 | 1.534774  | -1.016256 |
| H | -5.460978 | 0.897969  | -0.182605 |
| H | -4.302869 | 1.105361  | 2.698884  |
| H | -3.537641 | -0.487351 | 2.786278  |
| H | -5.150481 | -0.320538 | 2.091795  |
| H | 2.044599  | 3.966569  | -0.494493 |
| H | 1.450698  | 3.395493  | 1.054313  |
| H | 3.646908  | 3.051531  | 1.044145  |
| H | 5.880748  | 2.134938  | 1.469754  |
| H | 6.573706  | -0.015096 | 0.519083  |
| H | 2.747088  | -0.401590 | -1.361119 |
| H | -0.816053 | 3.739163  | 1.626202  |
| H | -3.106974 | 4.399248  | 1.012724  |
| H | -3.696142 | 4.790718  | -1.360877 |
| H | -1.963572 | 4.527029  | -3.113649 |
| H | 0.326922  | 3.868531  | -2.500732 |
| H | 6.253960  | -3.048996 | -1.396583 |
| H | 7.033053  | -1.456427 | -1.240610 |

H 6.422628 -2.302399 0.209724  
 ωB97X energy = -1507.41164426 a.u.

(5S,1'S)-9a, Conf. D

|   |           |           |           |
|---|-----------|-----------|-----------|
| C | -0.832098 | -0.126611 | -1.278095 |
| C | 0.486441  | -0.929818 | -1.390100 |
| N | 1.194875  | -0.502094 | -0.141910 |
| C | 0.386628  | 0.217585  | 0.606227  |
| N | -0.790036 | 0.420436  | 0.082502  |
| C | 0.286717  | -2.452996 | -1.577435 |
| C | -0.560382 | -3.074408 | -0.466135 |
| C | 1.638478  | -3.169027 | -1.661665 |
| C | -0.422766 | -2.637476 | -2.926577 |
| C | -1.905548 | 1.141058  | 0.709495  |
| C | 2.592776  | -0.700398 | 0.160006  |
| C | 3.546384  | -0.073579 | -0.654695 |
| C | 4.887955  | -0.350551 | -0.411328 |
| C | 5.272388  | -1.172591 | 0.632394  |
| C | 4.315169  | -1.718287 | 1.468684  |
| C | 2.957936  | -1.499485 | 1.254159  |
| C | 1.962565  | -2.101524 | 2.233248  |
| C | 2.118362  | -3.618372 | 2.360508  |
| C | 2.085070  | -1.430167 | 3.604669  |
| C | 3.192907  | 0.917999  | -1.752589 |
| C | 3.898086  | 2.258454  | -1.530046 |
| C | 3.520806  | 0.366255  | -3.142387 |
| C | -2.084567 | 2.521453  | 0.067299  |
| C | -3.137602 | 0.249278  | 0.698146  |
| C | -3.152919 | -0.870283 | 1.533799  |
| C | -4.243885 | -1.717376 | 1.526123  |
| C | -5.336859 | -1.473493 | 0.698613  |
| C | -5.321841 | -0.358220 | -0.128646 |
| C | -4.217745 | 0.499282  | -0.127183 |
| C | -0.885849 | 3.407874  | 0.292986  |
| C | -0.683613 | 4.006816  | 1.535560  |
| C | 0.429035  | 4.801455  | 1.767156  |
| C | 1.357832  | 5.011138  | 0.755066  |
| C | 1.164151  | 4.423347  | -0.486497 |
| C | 0.050008  | 3.624401  | -0.713912 |
| O | -6.325849 | -0.015705 | -0.973436 |
| C | -7.477091 | -0.847232 | -1.010797 |
| H | -0.881222 | 0.689222  | -2.000873 |
| H | -1.718191 | -0.747496 | -1.395462 |
| H | 1.065469  | -0.573217 | -2.241269 |
| H | 0.677490  | 0.612161  | 1.572555  |
| H | -1.548748 | -2.614342 | -0.383496 |
| H | -0.071843 | -3.002465 | 0.506683  |
| H | -0.713287 | -4.135297 | -0.674818 |
| H | 2.184175  | -3.143532 | -0.718820 |
| H | 2.275773  | -2.728493 | -2.433420 |
| H | 1.476537  | -4.217132 | -1.922436 |
| H | -1.419057 | -2.190872 | -2.943242 |
| H | 0.160426  | -2.201089 | -3.741943 |
| H | -0.540122 | -3.703279 | -3.130948 |
| H | -1.609977 | 1.286303  | 1.751044  |

|   |           |           |           |
|---|-----------|-----------|-----------|
| H | 5.646673  | 0.103099  | -1.038807 |
| H | 6.323293  | -1.371293 | 0.807882  |
| H | 4.627686  | -2.332750 | 2.305302  |
| H | 0.952651  | -1.911430 | 1.869002  |
| H | 1.342661  | -4.017682 | 3.017466  |
| H | 2.032143  | -4.117164 | 1.392650  |
| H | 3.086134  | -3.883836 | 2.791512  |
| H | 1.332778  | -1.828153 | 4.288956  |
| H | 1.948007  | -0.348058 | 3.539010  |
| H | 3.069453  | -1.613642 | 4.042016  |
| H | 2.121462  | 1.123783  | -1.705696 |
| H | 3.569787  | 2.978982  | -2.282655 |
| H | 3.670103  | 2.668300  | -0.543793 |
| H | 4.982164  | 2.159587  | -1.618015 |
| H | 3.208391  | 1.073126  | -3.913861 |
| H | 3.024647  | -0.588166 | -3.334433 |
| H | 4.596327  | 0.205126  | -3.250116 |
| H | -2.972957 | 2.975328  | 0.511328  |
| H | -2.278872 | 2.418635  | -1.002874 |
| H | -2.311046 | -1.072550 | 2.188158  |
| H | -4.258147 | -2.584460 | 2.176363  |
| H | -6.179388 | -2.151665 | 0.713561  |
| H | -4.245538 | 1.356435  | -0.789118 |
| H | -1.411285 | 3.856966  | 2.327700  |
| H | 0.568856  | 5.264175  | 2.737490  |
| H | 2.225958  | 5.635341  | 0.933030  |
| H | 1.880460  | 4.587959  | -1.283257 |
| H | -0.098597 | 3.176953  | -1.692525 |
| H | -8.149577 | -0.397565 | -1.736909 |
| H | -7.222072 | -1.860940 | -1.331070 |
| H | -7.968226 | -0.884692 | -0.034827 |

ωB97X energy = -1507.41163315 a.u.

(5S,1'S)-9a, Conf. E

|   |           |           |           |
|---|-----------|-----------|-----------|
| C | 0.420735  | 0.636024  | 1.608378  |
| C | -0.713262 | -0.419891 | 1.635684  |
| N | -0.945614 | -0.648100 | 0.175113  |
| C | -0.152858 | 0.129582  | -0.530040 |
| N | 0.648608  | 0.871446  | 0.179663  |
| C | -0.397838 | -1.660023 | 2.502424  |
| C | -1.585735 | -2.627716 | 2.508677  |
| C | -0.205260 | -1.142934 | 3.935339  |
| C | 0.864820  | -2.394867 | 2.051573  |
| C | 1.700364  | 1.745994  | -0.356951 |
| C | -2.067066 | -1.346662 | -0.410174 |
| C | -1.842430 | -2.537461 | -1.115384 |
| C | -2.954129 | -3.215299 | -1.606322 |
| C | -4.234784 | -2.730235 | -1.409375 |
| C | -4.424584 | -1.524552 | -0.757987 |
| C | -3.346995 | -0.793460 | -0.267471 |
| C | -3.606930 | 0.575112  | 0.343612  |
| C | -4.325196 | 1.488373  | -0.653761 |
| C | -4.399877 | 0.473800  | 1.648593  |
| C | -0.458535 | -3.093136 | -1.407663 |
| C | -0.297352 | -4.533840 | -0.918167 |

|   |           |           |           |
|---|-----------|-----------|-----------|
| C | -0.145527 | -2.995673 | -2.904030 |
| C | 1.475295  | 3.196078  | 0.085553  |
| C | 3.066813  | 1.176002  | -0.014296 |
| C | 3.730235  | 1.490095  | 1.171871  |
| C | 4.952696  | 0.899509  | 1.445566  |
| C | 5.534807  | 0.000519  | 0.560133  |
| C | 4.873312  | -0.309174 | -0.624032 |
| C | 3.641161  | 0.280941  | -0.902296 |
| C | 0.127020  | 3.723249  | -0.341995 |
| C | -0.880021 | 3.952101  | 0.591196  |
| C | -2.129486 | 4.409826  | 0.191402  |
| C | -2.386699 | 4.645644  | -1.151153 |
| C | -1.387436 | 4.425993  | -2.090887 |
| C | -0.141224 | 3.968353  | -1.687639 |
| O | 5.344329  | -1.165438 | -1.563848 |
| C | 6.604787  | -1.779947 | -1.333796 |
| H | 0.130377  | 1.563769  | 2.100419  |
| H | 1.342315  | 0.273921  | 2.063346  |
| H | -1.621281 | 0.028806  | 2.041556  |
| H | -0.173501 | 0.155159  | -1.613035 |
| H | -1.754289 | -3.088291 | 1.535086  |
| H | -2.508200 | -2.122526 | 2.808566  |
| H | -1.397211 | -3.428239 | 3.227355  |
| H | -1.093656 | -0.610084 | 4.284979  |
| H | 0.653129  | -0.473480 | 4.026746  |
| H | -0.035032 | -1.986661 | 4.606643  |
| H | 0.753838  | -2.819194 | 1.053641  |
| H | 1.748892  | -1.752311 | 2.050706  |
| H | 1.066939  | -3.219852 | 2.737875  |
| H | 1.580678  | 1.701444  | -1.441150 |
| H | -2.813359 | -4.141292 | -2.152397 |
| H | -5.087712 | -3.282296 | -1.786907 |
| H | -5.428717 | -1.131345 | -0.646189 |
| H | -2.649833 | 1.054483  | 0.561468  |
| H | -4.442239 | 2.486079  | -0.225423 |
| H | -3.758123 | 1.584575  | -1.582444 |
| H | -5.319848 | 1.108749  | -0.898189 |
| H | -4.532373 | 1.464492  | 2.088757  |
| H | -3.898898 | -0.160748 | 2.383923  |
| H | -5.391226 | 0.050687  | 1.468599  |
| H | 0.278019  | -2.482712 | -0.884132 |
| H | 0.730720  | -4.867648 | -1.074981 |
| H | -0.526038 | -4.630528 | 0.145502  |
| H | -0.953398 | -5.213997 | -1.465936 |
| H | 0.871030  | -3.344089 | -3.098855 |
| H | -0.230377 | -1.969269 | -3.268970 |
| H | -0.831482 | -3.614511 | -3.487797 |
| H | 2.276897  | 3.790619  | -0.358619 |
| H | 1.581400  | 3.287952  | 1.168014  |
| H | 3.306974  | 2.190688  | 1.881543  |
| H | 5.470151  | 1.140677  | 2.366889  |
| H | 6.491976  | -0.442092 | 0.800653  |
| H | 3.146294  | 0.024751  | -1.833806 |
| H | -0.684731 | 3.786679  | 1.646421  |
| H | -2.901097 | 4.584832  | 0.932959  |
| H | -3.360796 | 5.002981  | -1.465275 |

|   |           |           |           |
|---|-----------|-----------|-----------|
| H | -1.577335 | 4.616087  | -3.141145 |
| H | 0.636358  | 3.810108  | -2.429101 |
| H | 6.792576  | -2.412503 | -2.197642 |
| H | 7.398192  | -1.032423 | -1.251430 |
| H | 6.585464  | -2.395312 | -0.430379 |

ωB97X energy = -1507.41141397 a.u.

(5S,1'S)-9a, Conf. F

|   |           |           |           |
|---|-----------|-----------|-----------|
| C | 0.370134  | 0.517155  | -1.971445 |
| C | -0.769259 | -0.518396 | -1.823062 |
| N | -0.793223 | -0.712330 | -0.337923 |
| C | 0.007582  | 0.157305  | 0.239311  |
| N | 0.648790  | 0.930337  | -0.591542 |
| C | -2.109411 | -0.089751 | -2.464655 |
| C | -2.631483 | 1.230773  | -1.895677 |
| C | -3.155673 | -1.193635 | -2.283266 |
| C | -1.854601 | 0.065216  | -3.970384 |
| C | 1.607804  | 1.990472  | -0.280717 |
| C | -1.372078 | -1.838012 | 0.359865  |
| C | -0.805506 | -3.102811 | 0.146744  |
| C | -1.421012 | -4.197267 | 0.745942  |
| C | -2.526009 | -4.038201 | 1.562691  |
| C | -3.018297 | -2.770845 | 1.818391  |
| C | -2.453399 | -1.642562 | 1.231514  |
| C | -3.002408 | -0.275529 | 1.608128  |
| C | -4.490347 | -0.129475 | 1.283727  |
| C | -2.751120 | 0.009709  | 3.092449  |
| C | 0.470098  | -3.328208 | -0.650766 |
| C | 1.563541  | -3.928984 | 0.237268  |
| C | 0.224506  | -4.201940 | -1.882533 |
| C | 1.183131  | 2.800118  | 0.953363  |
| C | 3.030093  | 1.467649  | -0.167555 |
| C | 4.073840  | 2.278287  | -0.613667 |
| C | 5.381319  | 1.848813  | -0.477185 |
| C | 5.677231  | 0.614931  | 0.092434  |
| C | 4.634914  | -0.192641 | 0.532834  |
| C | 3.314133  | 0.239730  | 0.401822  |
| C | -0.199949 | 3.394788  | 0.821699  |
| C | -1.208583 | 3.066590  | 1.721997  |
| C | -2.488759 | 3.589957  | 1.579432  |
| C | -2.775203 | 4.452198  | 0.532120  |
| C | -1.771417 | 4.797790  | -0.364964 |
| C | -0.495957 | 4.274465  | -0.219371 |
| O | 4.796886  | -1.414242 | 1.099471  |
| C | 6.119997  | -1.909978 | 1.249948  |
| H | 1.274401  | 0.090355  | -2.409114 |
| H | 0.076616  | 1.387974  | -2.555438 |
| H | -0.479019 | -1.464638 | -2.279791 |
| H | 0.131011  | 0.201028  | 1.313736  |
| H | -1.924051 | 2.053730  | -2.029076 |
| H | -2.861370 | 1.156817  | -0.831450 |
| H | -3.553427 | 1.509771  | -2.410200 |
| H | -3.409442 | -1.361334 | -1.237364 |
| H | -2.803557 | -2.141302 | -2.700678 |
| H | -4.072612 | -0.917805 | -2.808556 |

|   |           |           |           |
|---|-----------|-----------|-----------|
| H | -1.165311 | 0.880050  | -4.200337 |
| H | -1.450595 | -0.855726 | -4.399492 |
| H | -2.797316 | 0.284127  | -4.475313 |
| H | 1.568120  | 2.656385  | -1.145275 |
| H | -1.013554 | -5.189391 | 0.587033  |
| H | -2.990733 | -4.903287 | 2.021304  |
| H | -3.859048 | -2.653060 | 2.492777  |
| H | -2.468567 | 0.486571  | 1.038875  |
| H | -4.821989 | 0.885508  | 1.516010  |
| H | -4.698206 | -0.317828 | 0.228743  |
| H | -5.094937 | -0.820237 | 1.875923  |
| H | -3.087298 | 1.018322  | 3.344977  |
| H | -1.691944 | -0.072742 | 3.348041  |
| H | -3.300470 | -0.691663 | 3.724800  |
| H | 0.851183  | -2.364336 | -0.991863 |
| H | 2.495642  | -4.016343 | -0.325396 |
| H | 1.750893  | -3.301924 | 1.111852  |
| H | 1.289450  | -4.926561 | 0.588181  |
| H | 1.144638  | -4.305687 | -2.461257 |
| H | -0.543409 | -3.779252 | -2.535490 |
| H | -0.102868 | -5.203165 | -1.592353 |
| H | 1.927737  | 3.590490  | 1.073378  |
| H | 1.251567  | 2.182137  | 1.852504  |
| H | 3.859523  | 3.239292  | -1.068696 |
| H | 6.193052  | 2.476970  | -0.825466 |
| H | 6.708191  | 0.300040  | 0.181163  |
| H | 2.535145  | -0.425332 | 0.758916  |
| H | -0.992342 | 2.404662  | 2.555846  |
| H | -3.261762 | 3.324458  | 2.292701  |
| H | -3.772307 | 4.861440  | 0.418310  |
| H | -1.982963 | 5.481872  | -1.178881 |
| H | 0.279636  | 4.562938  | -0.922465 |
| H | 6.022669  | -2.885874 | 1.718718  |
| H | 6.612291  | -2.019637 | 0.280096  |
| H | 6.716159  | -1.256178 | 1.891951  |

ωB97X energy = -1507.41116766 a.u.

(5S,1'S)-9a, Conf. G

|   |           |           |           |
|---|-----------|-----------|-----------|
| C | 0.881946  | 0.118521  | 1.183574  |
| C | -0.448217 | -0.628812 | 1.448782  |
| N | -1.135132 | -0.484410 | 0.126549  |
| C | -0.322022 | 0.079032  | -0.740681 |
| N | 0.844366  | 0.396696  | -0.255403 |
| C | -0.270302 | -2.071331 | 1.977968  |
| C | 0.420901  | -1.950493 | 3.343475  |
| C | 0.580817  | -2.937478 | 1.048025  |
| C | -1.633398 | -2.734129 | 2.201211  |
| C | 1.961628  | 0.972205  | -1.015439 |
| C | -2.534051 | -0.720284 | -0.141384 |
| C | -3.481053 | 0.101229  | 0.486413  |
| C | -4.826087 | -0.194592 | 0.287755  |
| C | -5.217481 | -1.228946 | -0.543159 |
| C | -4.263700 | -1.976107 | -1.210834 |
| C | -2.904361 | -1.742764 | -1.027292 |
| C | -1.910160 | -2.571174 | -1.825567 |



|   |           |           |           |
|---|-----------|-----------|-----------|
| C | -2.089816 | -4.073378 | -1.597011 |
| C | -2.008915 | -2.237007 | -3.317174 |
| C | -3.115114 | 1.315917  | 1.325986  |
| C | -3.774079 | 2.582379  | 0.772749  |
| C | -3.483865 | 1.118915  | 2.798502  |
| C | 2.259222  | 2.398872  | -0.539304 |
| C | 3.142226  | 0.014406  | -0.981399 |
| C | 3.186053  | -1.016854 | -1.908523 |
| C | 4.225229  | -1.940499 | -1.868042 |
| C | 5.215418  | -1.841693 | -0.910792 |
| C | 5.176390  | -0.805088 | 0.021390  |
| C | 4.140864  | 0.124071  | -0.013986 |
| C | 1.049490  | 3.296635  | -0.628486 |
| C | 0.424124  | 3.761824  | 0.524729  |
| C | -0.705746 | 4.566125  | 0.446385  |
| C | -1.227434 | 4.912897  | -0.791289 |
| C | -0.608836 | 4.458049  | -1.949093 |
| C | 0.521376  | 3.657321  | -1.866987 |
| O | 6.187090  | -0.780383 | 0.924944  |
| C | 6.195365  | 0.256862  | 1.895129  |
| H | 0.944173  | 1.056801  | 1.736271  |
| H | 1.759433  | -0.482061 | 1.417031  |
| H | -1.035440 | -0.084669 | 2.188027  |
| H | -0.601982 | 0.268654  | -1.770323 |
| H | -0.168881 | -1.337363 | 4.030275  |
| H | 1.420417  | -1.516182 | 3.271354  |
| H | 0.527352  | -2.942389 | 3.786436  |
| H | 1.580443  | -2.524651 | 0.887635  |
| H | 0.108850  | -3.073310 | 0.073875  |
| H | 0.708228  | -3.927928 | 1.489764  |
| H | -2.275381 | -2.119956 | 2.838862  |
| H | -2.164653 | -2.920043 | 1.268127  |
| H | -1.491871 | -3.695694 | 2.699242  |
| H | 1.606817  | 1.024923  | -2.046524 |
| H | -5.581536 | 0.410976  | 0.775492  |
| H | -6.270804 | -1.438309 | -0.689369 |
| H | -4.580777 | -2.759380 | -1.890061 |
| H | -0.900053 | -2.313872 | -1.504649 |
| H | -1.317136 | -4.626448 | -2.135480 |
| H | -2.015978 | -4.333716 | -0.538881 |
| H | -3.059701 | -4.418566 | -1.961934 |
| H | -1.257401 | -2.795323 | -3.879397 |
| H | -1.852593 | -1.171832 | -3.503534 |
| H | -2.992233 | -2.502828 | -3.712600 |
| H | -2.037100 | 1.478985  | 1.258700  |
| H | -3.434586 | 3.454062  | 1.336536  |
| H | -3.515078 | 2.738349  | -0.276699 |
| H | -4.862301 | 2.535084  | 0.854144  |
| H | -3.169776 | 1.984030  | 3.386361  |
| H | -3.014564 | 0.229118  | 3.225582  |
| H | -4.564767 | 1.008239  | 2.915163  |
| H | 3.070392  | 2.781795  | -1.162883 |
| H | 2.628096  | 2.392207  | 0.488149  |
| H | 2.412914  | -1.101718 | -2.665093 |
| H | 4.261802  | -2.743244 | -2.595242 |
| H | 6.030807  | -2.554002 | -0.868294 |

|   |           |          |           |
|---|-----------|----------|-----------|
| H | 4.115248  | 0.928851 | 0.707712  |
| H | 0.832623  | 3.507168 | 1.498057  |
| H | -1.176541 | 4.923405 | 1.355413  |
| H | -2.110572 | 5.538290 | -0.854731 |
| H | -1.005532 | 4.731871 | -2.920134 |
| H | 1.003358  | 3.316764 | -2.778699 |
| H | 7.078072  | 0.088097 | 2.506620  |
| H | 6.264868  | 1.239944 | 1.421756  |
| H | 5.303515  | 0.215163 | 2.526581  |

ωB97X energy = -1507.41116476 a.u.

(5S,1'S)-**9a**, Conf. H

|   |           |           |           |
|---|-----------|-----------|-----------|
| C | -0.905258 | -0.218750 | -1.202174 |
| C | 0.462213  | -0.922272 | -1.373549 |
| N | 1.180797  | -0.467330 | -0.141123 |
| C | 0.349105  | 0.178509  | 0.647764  |
| N | -0.855491 | 0.307099  | 0.166279  |
| C | 0.364914  | -2.452503 | -1.582954 |
| C | -0.395481 | -3.150050 | -0.454119 |
| C | 1.760277  | -3.068474 | -1.727633 |
| C | -0.376796 | -2.665623 | -2.910209 |
| C | -1.997790 | 0.931173  | 0.847583  |
| C | 2.599576  | -0.568260 | 0.104874  |
| C | 3.471732  | 0.145221  | -0.729557 |
| C | 4.838504  | -0.042951 | -0.549357 |
| C | 5.323029  | -0.863729 | 0.452975  |
| C | 4.442395  | -1.494798 | 1.312970  |
| C | 3.065318  | -1.365160 | 1.161516  |
| C | 2.158112  | -2.053721 | 2.168924  |
| C | 2.414052  | -3.560092 | 2.248949  |
| C | 2.307506  | -1.407830 | 3.550011  |
| C | 3.003141  | 1.138736  | -1.781875 |
| C | 3.623610  | 2.518466  | -1.545850 |
| C | 3.311920  | 0.651036  | -3.199776 |
| C | -2.294850 | 2.312103  | 0.250012  |
| C | -3.166709 | -0.042129 | 0.850512  |
| C | -3.158337 | -1.083286 | 1.767719  |
| C | -4.190722 | -2.014683 | 1.765842  |
| C | -5.227352 | -1.911896 | 0.858893  |
| C | -5.240940 | -0.864601 | -0.061601 |
| C | -4.209242 | 0.069982  | -0.067764 |
| C | -1.156142 | 3.280048  | 0.452674  |
| C | -0.289000 | 3.598525  | -0.588575 |
| C | 0.766736  | 4.479537  | -0.387699 |
| C | 0.971163  | 5.048227  | 0.861030  |
| C | 0.112052  | 4.735972  | 1.907536  |
| C | -0.942956 | 3.859329  | 1.702743  |
| O | -6.296175 | -0.835280 | -0.912713 |
| C | -6.366452 | 0.220115  | -1.860645 |
| H | -1.037619 | 0.602908  | -1.907827 |
| H | -1.747626 | -0.900194 | -1.302186 |
| H | 0.983998  | -0.510216 | -2.236254 |
| H | 0.642797  | 0.573554  | 1.613065  |
| H | -1.416841 | -2.776268 | -0.342429 |
| H | 0.111260  | -3.041761 | 0.505952  |

|                                            |           |           |           |   |           |           |           |
|--------------------------------------------|-----------|-----------|-----------|---|-----------|-----------|-----------|
| H                                          | -0.464360 | -4.218813 | -0.667040 | C | 4.591863  | -2.226008 | -1.571879 |
| H                                          | 2.335501  | -3.023031 | -0.803424 | C | 3.683044  | -3.014362 | -0.889399 |
| H                                          | 2.337328  | -2.568488 | -2.510494 | C | 2.537962  | -2.465241 | -0.321288 |
| H                                          | 1.663328  | -4.120033 | -2.006311 | C | 1.524798  | -3.397493 | 0.325023  |
| H                                          | -1.401430 | -2.288825 | -2.885396 | C | 1.001582  | -4.420357 | -0.687320 |
| H                                          | 0.146629  | -2.177912 | -3.737090 | C | 2.101441  | -4.097644 | 1.557581  |
| H                                          | -0.427750 | -3.733855 | -3.128924 | C | 3.013250  | 1.217874  | -1.405377 |
| H                                          | -1.679044 | 1.068435  | 1.883014  | C | 4.173116  | 2.076935  | -0.897021 |
| H                                          | 5.536336  | 0.479673  | -1.193644 | C | 2.771404  | 1.480332  | -2.895226 |
| H                                          | 6.391467  | -0.994585 | 0.579081  | C | -2.163246 | 1.651933  | -1.101742 |
| H                                          | 4.832173  | -2.106307 | 2.118854  | C | -3.154238 | -0.540771 | -0.279508 |
| H                                          | 1.120903  | -1.919288 | 1.860715  | C | -2.716142 | -1.745272 | -0.802285 |
| H                                          | 1.701090  | -4.022014 | 2.935313  | C | -3.643057 | -2.742637 | -1.101146 |
| H                                          | 2.306728  | -4.042463 | 1.274950  | C | -4.989420 | -2.543880 | -0.882373 |
| H                                          | 3.418416  | -3.772694 | 2.621563  | C | -5.432936 | -1.329857 | -0.351837 |
| H                                          | 1.606369  | -1.858273 | 4.255750  | C | -4.515330 | -0.332614 | -0.048713 |
| H                                          | 2.115390  | -0.332712 | 3.516142  | C | -1.316198 | 2.854430  | -0.754507 |
| H                                          | 3.317871  | -1.551835 | 3.940364  | C | -1.628295 | 3.641456  | 0.353800  |
| H                                          | 1.922710  | 1.267840  | -1.685775 | C | -0.837946 | 4.726797  | 0.698785  |
| H                                          | 3.219139  | 3.234842  | -2.264620 | C | 0.280051  | 5.046788  | -0.062507 |
| H                                          | 3.406100  | 2.884889  | -0.540248 | C | 0.591853  | 4.280204  | -1.174926 |
| H                                          | 4.707881  | 2.496519  | -1.675372 | C | -0.202895 | 3.191754  | -1.517174 |
| H                                          | 2.931170  | 1.361525  | -3.936466 | O | -6.769895 | -1.218973 | -0.158374 |
| H                                          | 2.865809  | -0.324728 | -3.406382 | C | -7.269583 | -0.003338 | 0.380995  |
| H                                          | 4.390421  | 0.557377  | -3.349111 | H | -1.118863 | -1.019168 | 2.122866  |
| H                                          | -3.197712 | 2.688207  | 0.736155  | H | -0.755083 | 0.687994  | 2.427869  |
| H                                          | -2.519735 | 2.225466  | -0.815238 | H | 1.179110  | -1.479909 | 2.106481  |
| H                                          | -2.349893 | -1.168854 | 2.486426  | H | 0.084222  | -0.034391 | -1.459994 |
| H                                          | -4.187141 | -2.825651 | 2.484806  | H | 1.546886  | -0.683484 | 4.352103  |
| H                                          | -6.039461 | -2.629112 | 0.848263  | H | 0.423802  | 0.675977  | 4.190490  |
| H                                          | -4.218149 | 0.881017  | -0.782837 | H | 2.099886  | 0.969363  | 4.637297  |
| H                                          | -0.447964 | 3.168842  | -1.573513 | H | 2.314899  | 2.596868  | 2.731164  |
| H                                          | 1.427600  | 4.725050  | -1.211155 | H | 0.667805  | 2.295071  | 2.191125  |
| H                                          | 1.792053  | 5.738588  | 1.017613  | H | 2.017356  | 2.103591  | 1.068749  |
| H                                          | 0.259975  | 5.183064  | 2.883972  | H | 3.483629  | -0.959533 | 2.747567  |
| H                                          | -1.617740 | 3.629564  | 2.522050  | H | 3.740839  | 0.190834  | 1.433260  |
| H                                          | -7.284598 | 0.059315  | -2.419909 | H | 3.945629  | 0.707093  | 3.104932  |
| H                                          | -6.409961 | 1.193936  | -1.365481 | H | -2.589510 | 1.116452  | 0.922365  |
| H                                          | -5.515117 | 0.194128  | -2.546447 | H | 5.053121  | -0.268968 | -2.290653 |
| $\omega$ B97X energy = -1507.41106329 a.u. |           |           |           | H | 5.477027  | -2.672935 | -2.009376 |
| (5S,1'S)-9a, Conf. I                       |           |           |           | H | 3.855204  | -4.082051 | -0.813079 |
| C                                          | -0.526014 | -0.165039 | 1.791082  | H | 0.659195  | -2.813841 | 0.641696  |
| C                                          | 0.988054  | -0.475722 | 1.728866  | H | 0.219433  | -5.029828 | -0.229431 |
| N                                          | 1.222561  | -0.489526 | 0.249185  | H | 0.580216  | -3.927109 | -1.566052 |
| C                                          | 0.133574  | -0.103232 | -0.380295 | H | 1.794614  | -5.092401 | -1.023007 |
| N                                          | -0.874857 | 0.158475  | 0.403783  | H | 1.337741  | -4.716961 | 2.032564  |
| C                                          | 1.872767  | 0.495157  | 2.544090  | H | 2.469844  | -3.383181 | 2.298247  |
| C                                          | 1.451223  | 0.351703  | 4.013303  | H | 2.935289  | -4.747551 | 1.281582  |
| C                                          | 1.701152  | 1.949176  | 2.101548  | H | 2.115759  | 1.533586  | -0.871924 |
| C                                          | 3.344135  | 0.081458  | 2.441895  | H | 3.943506  | 3.135194  | -1.043423 |
| C                                          | -2.213242 | 0.613135  | 0.029148  | H | 4.363482  | 1.917634  | 0.166122  |
| C                                          | 2.359994  | -1.077824 | -0.421790 | H | 5.095256  | 1.859027  | -1.440743 |
| C                                          | 3.236859  | -0.265271 | -1.155493 | H | 2.561954  | 2.539542  | -3.063274 |
| C                                          | 4.354716  | -0.871483 | -1.720933 | H | 1.929101  | 0.899589  | -3.279039 |
|                                            |           |           |           | H | 3.651805  | 1.218736  | -3.486916 |
|                                            |           |           |           | H | -3.195282 | 1.956470  | -1.289734 |

|   |           |           |           |
|---|-----------|-----------|-----------|
| H | -1.812246 | 1.186729  | -2.026632 |
| H | -1.663690 | -1.934570 | -0.979088 |
| H | -3.300604 | -3.686720 | -1.508868 |
| H | -5.717636 | -3.313608 | -1.108377 |
| H | -4.841688 | 0.610542  | 0.372419  |
| H | -2.503219 | 3.409843  | 0.953590  |
| H | -1.096518 | 5.327592  | 1.563307  |
| H | 0.899180  | 5.894489  | 0.207259  |
| H | 1.455021  | 4.530230  | -1.782637 |
| H | 0.042206  | 2.607743  | -2.399514 |
| H | -6.856736 | 0.185916  | 1.375541  |
| H | -7.045742 | 0.841079  | -0.276491 |
| H | -8.346758 | -0.128346 | 0.455613  |

ωB97X energy = -1507.41080505 a.u.

(5S,1'S)-9a, Conf. J

|   |           |           |           |
|---|-----------|-----------|-----------|
| C | 0.514833  | 0.400547  | -2.018526 |
| C | -0.766639 | -0.450803 | -1.865905 |
| N | -0.822099 | -0.625741 | -0.379075 |
| C | 0.097416  | 0.122014  | 0.193415  |
| N | 0.847396  | 0.783696  | -0.642447 |
| C | -2.025011 | 0.168914  | -2.517182 |
| C | -1.744908 | 0.267742  | -4.023338 |
| C | -2.340642 | 1.559488  | -1.963560 |
| C | -3.228940 | -0.759601 | -2.330547 |
| C | 1.957237  | 1.698627  | -0.350807 |
| C | -1.592066 | -1.625218 | 0.325597  |
| C | -2.622434 | -1.234762 | 1.193476  |
| C | -3.389019 | -2.240077 | 1.775631  |
| C | -3.142413 | -3.576036 | 1.515763  |
| C | -2.081768 | -3.935830 | 0.703936  |
| C | -1.269200 | -2.973384 | 0.113453  |
| C | -0.048654 | -3.428343 | -0.671630 |
| C | 0.890065  | -4.246115 | 0.220344  |
| C | -0.433854 | -4.222199 | -1.921860 |
| C | -2.917935 | 0.208689  | 1.569192  |
| C | -4.356818 | 0.614389  | 1.242841  |
| C | -2.619674 | 0.442344  | 3.053759  |
| C | 1.691646  | 2.541131  | 0.902260  |
| C | 3.286172  | 0.966212  | -0.305150 |
| C | 4.308192  | 1.358063  | -1.152189 |
| C | 5.541369  | 0.711163  | -1.090856 |
| C | 5.749206  | -0.318319 | -0.198249 |
| C | 4.717242  | -0.718227 | 0.655112  |
| C | 3.487508  | -0.074999 | 0.603037  |
| C | 0.411069  | 3.341157  | 0.824519  |
| C | 0.199982  | 4.248536  | -0.213758 |
| C | -0.983059 | 4.966232  | -0.299336 |
| C | -1.977007 | 4.792350  | 0.656600  |
| C | -1.772480 | 3.903489  | 1.700602  |
| C | -0.585419 | 3.184416  | 1.782276  |
| O | 5.009798  | -1.739038 | 1.497994  |
| C | 3.995954  | -2.188944 | 2.383799  |
| H | 1.347406  | -0.159810 | -2.448024 |
| H | 0.354938  | 1.299041  | -2.612177 |

|   |           |           |           |
|---|-----------|-----------|-----------|
| H | -0.619801 | -1.432919 | -2.314268 |
| H | 0.216549  | 0.161468  | 1.268617  |
| H | -1.493304 | -0.709649 | -4.443834 |
| H | -0.933737 | 0.960023  | -4.257809 |
| H | -2.639124 | 0.631000  | -4.533251 |
| H | -3.211794 | 1.968819  | -2.479384 |
| H | -1.517799 | 2.264741  | -2.108279 |
| H | -2.575941 | 1.532737  | -0.898134 |
| H | -3.021473 | -1.757894 | -2.726369 |
| H | -3.518082 | -0.866171 | -1.285705 |
| H | -4.086870 | -0.357516 | -2.873776 |
| H | 1.983017  | 2.374561  | -1.207569 |
| H | -4.196944 | -1.969259 | 2.446055  |
| H | -3.764394 | -4.340237 | 1.967210  |
| H | -1.867472 | -4.986233 | 0.541287  |
| H | 0.516384  | -2.548739 | -0.984835 |
| H | 1.809050  | -4.483089 | -0.320199 |
| H | 1.156180  | -3.692689 | 1.123978  |
| H | 0.429493  | -5.187828 | 0.526981  |
| H | 0.459827  | -4.492677 | -2.488056 |
| H | -1.095493 | -3.653584 | -2.580012 |
| H | -0.951501 | -5.145813 | -1.651804 |
| H | -2.259106 | 0.865758  | 0.999801  |
| H | -4.503301 | 1.674179  | 1.464927  |
| H | -4.595104 | 0.455322  | 0.189238  |
| H | -5.073624 | 0.046650  | 1.840304  |
| H | -2.790794 | 1.489409  | 3.313755  |
| H | -1.585436 | 0.192031  | 3.303151  |
| H | -3.269811 | -0.167944 | 3.684843  |
| H | 2.549962  | 3.209108  | 1.006566  |
| H | 1.692309  | 1.910282  | 1.795533  |
| H | 4.150097  | 2.163989  | -1.860202 |
| H | 6.342928  | 1.015658  | -1.753672 |
| H | 6.701216  | -0.832596 | -0.141717 |
| H | 2.689332  | -0.379228 | 1.268757  |
| H | 0.969908  | 4.404345  | -0.963141 |
| H | -1.128589 | 5.668302  | -1.112431 |
| H | -2.902404 | 5.352540  | 0.589887  |
| H | -2.537074 | 3.771528  | 2.458503  |
| H | -0.430855 | 2.501068  | 2.612264  |
| H | 3.686596  | -1.394538 | 3.068395  |
| H | 3.125979  | -2.557995 | 1.832458  |
| H | 4.433483  | -3.005402 | 2.952528  |

ωB97X energy = -1507.41080005 a.u.

(5S,1'S)-9a, Conf. K

|   |           |           |           |
|---|-----------|-----------|-----------|
| C | 0.660977  | 0.039654  | 1.720921  |
| C | -0.760064 | 0.648980  | 1.724245  |
| N | -1.098830 | 0.605508  | 0.265964  |
| C | -0.168473 | -0.056561 | -0.388782 |
| N | 0.819473  | -0.468475 | 0.354495  |
| C | -1.757785 | -0.066032 | 2.664401  |
| C | -1.911744 | -1.549470 | 2.324130  |
| C | -3.119261 | 0.633812  | 2.614979  |
| C | -1.212532 | 0.082501  | 4.091724  |

|   |           |           |           |                                            |           |           |           |
|---|-----------|-----------|-----------|--------------------------------------------|-----------|-----------|-----------|
| C | 2.016405  | -1.209591 | -0.053203 | H                                          | -0.017522 | 4.894552  | 1.582894  |
| C | -2.119556 | 1.399349  | -0.380064 | H                                          | -1.420280 | 3.940380  | 2.085891  |
| C | -1.955939 | 2.792032  | -0.387868 | H                                          | -1.617265 | 5.260569  | 0.932505  |
| C | -2.991368 | 3.563749  | -0.905206 | H                                          | 2.651425  | -2.744084 | -1.363914 |
| C | -4.124888 | 2.975439  | -1.436445 | H                                          | 1.477208  | -1.683935 | -2.100959 |
| C | -4.224015 | 1.596776  | -1.493085 | H                                          | 2.049060  | 0.884707  | -1.863150 |
| C | -3.225032 | 0.776365  | -0.977260 | H                                          | 3.949755  | 2.329132  | -2.418883 |
| C | -3.360030 | -0.728176 | -1.150507 | H                                          | 6.124315  | 2.041463  | -1.324272 |
| C | -4.625849 | -1.289052 | -0.499829 | H                                          | 4.520990  | -1.202580 | 0.974422  |
| C | -3.323796 | -1.088534 | -2.639870 | H                                          | -0.631407 | -2.653183 | -2.488262 |
| C | -0.687021 | 3.490300  | 0.076660  | H                                          | -2.447731 | -4.204451 | -1.882953 |
| C | -0.017362 | 4.218609  | -1.092418 | H                                          | -2.242772 | -5.637844 | 0.124467  |
| C | -0.953072 | 4.448916  | 1.238746  | H                                          | -0.191113 | -5.520771 | 1.509415  |
| C | 1.716343  | -2.212053 | -1.173921 | H                                          | 1.623189  | -3.979383 | 0.907565  |
| C | 3.155571  | -0.267823 | -0.400439 | H                                          | 8.545233  | 0.581188  | 0.907001  |
| C | 2.997807  | 0.734380  | -1.359074 | H                                          | 8.036357  | 0.834519  | -0.779666 |
| C | 4.068399  | 1.549764  | -1.675007 | H                                          | 7.551347  | 1.996447  | 0.487725  |
| C | 5.304752  | 1.388370  | -1.056473 | $\omega$ B97X energy = -1507.41079226 a.u. |           |           |           |
| C | 5.459164  | 0.389577  | -0.102774 |                                            |           |           |           |
| C | 4.378223  | -0.433426 | 0.222822  | (5S,1'S)- <b>9a</b> , Conf. L              |           |           |           |
| C | 0.616072  | -3.187383 | -0.823054 |                                            |           |           |           |
| C | -0.534842 | -3.271169 | -1.599874 | C                                          | -0.481546 | 1.028941  | -1.520273 |
| C | -1.559405 | -4.148552 | -1.263320 | C                                          | -0.827024 | -0.479168 | -1.539689 |
| C | -1.444955 | -4.953974 | -0.140917 | N                                          | -0.548939 | -0.864034 | -0.117201 |
| C | -0.294492 | -4.886505 | 0.636385  | C                                          | 0.084671  | 0.123904  | 0.481690  |
| C | 0.726436  | -4.012385 | 0.296284  | N                                          | 0.192174  | 1.208703  | -0.229453 |
| O | 6.610327  | 0.140271  | 0.568264  | C                                          | -2.213844 | -0.808293 | -2.131316 |
| C | 7.743699  | 0.942957  | 0.268046  | C                                          | -3.367673 | -0.151857 | -1.374331 |
| H | 1.439689  | 0.777139  | 1.924402  | C                                          | -2.422774 | -2.325231 | -2.186329 |
| H | 0.767997  | -0.783595 | 2.425233  | C                                          | -2.193311 | -0.280121 | -3.573439 |
| H | -0.721115 | 1.695310  | 2.027475  | C                                          | 0.858105  | 2.452450  | 0.202373  |
| H | -0.224645 | -0.224723 | -1.456463 | C                                          | -0.449478 | -2.219490 | 0.380050  |
| H | -0.963717 | -2.091399 | 2.381891  | C                                          | 0.632125  | -3.006501 | -0.039402 |
| H | -2.324387 | -1.699829 | 1.324635  | C                                          | 0.670459  | -4.330728 | 0.386344  |
| H | -2.596531 | -2.018100 | 3.034046  | C                                          | -0.300354 | -4.838235 | 1.231904  |
| H | -3.599131 | 0.547193  | 1.641042  | C                                          | -1.314354 | -4.017307 | 1.693063  |
| H | -3.022138 | 1.697716  | 2.849467  | C                                          | -1.409141 | -2.690293 | 1.285002  |
| H | -3.786788 | 0.187896  | 3.355537  | C                                          | -2.496172 | -1.811106 | 1.878838  |
| H | -0.266234 | -0.441383 | 4.240408  | C                                          | -3.895277 | -2.389450 | 1.659071  |
| H | -1.064720 | 1.134958  | 4.348837  | C                                          | -2.238676 | -1.577304 | 3.370830  |
| H | -1.930879 | -0.336711 | 4.798803  | C                                          | 1.788774  | -2.469513 | -0.869966 |
| H | 2.305012  | -1.774800 | 0.835138  | C                                          | 3.092264  | -2.522214 | -0.066387 |
| H | -2.898628 | 4.644039  | -0.909724 | C                                          | 1.931336  | -3.208201 | -2.201554 |
| H | -4.922524 | 3.593383  | -1.832252 | C                                          | -0.017244 | 3.232515  | 1.188433  |
| H | -5.096399 | 1.145393  | -1.952104 | C                                          | 2.260392  | 2.120261  | 0.693661  |
| H | -2.506056 | -1.216714 | -0.678285 | C                                          | 2.659345  | 2.308660  | 2.004254  |
| H | -4.654014 | -2.374570 | -0.621891 | C                                          | 3.951195  | 1.943500  | 2.388832  |
| H | -4.668922 | -1.069454 | 0.568720  | C                                          | 4.830680  | 1.396293  | 1.481701  |
| H | -5.525328 | -0.878893 | -0.964703 | C                                          | 4.430276  | 1.207692  | 0.154817  |
| H | -3.349635 | -2.172917 | -2.768056 | C                                          | 3.151728  | 1.573088  | -0.236295 |
| H | -2.424012 | -0.705768 | -3.127592 | C                                          | -1.389279 | 3.525902  | 0.633909  |
| H | -4.187038 | -0.671666 | -3.163749 | C                                          | -2.503868 | 2.830618  | 1.092472  |
| H | 0.028135  | 2.739694  | 0.415492  | C                                          | -3.762133 | 3.071004  | 0.553900  |
| H | 0.922295  | 4.667572  | -0.763224 | C                                          | -3.918993 | 4.011931  | -0.453314 |
| H | 0.201116  | 3.529595  | -1.911497 | C                                          | -2.812943 | 4.716597  | -0.913913 |
| H | -0.653508 | 5.017453  | -1.480457 | C                                          | -1.559007 | 4.476084  | -0.371997 |

|                                    |           |           |           |   |           |           |           |
|------------------------------------|-----------|-----------|-----------|---|-----------|-----------|-----------|
| O                                  | 5.356541  | 0.664997  | -0.673909 | C | -2.485625 | -0.615782 | 2.661988  |
| C                                  | 5.015542  | 0.502289  | -2.042779 | C | -2.265954 | 0.012943  | 4.045207  |
| H                                  | 0.185290  | 1.314815  | -2.332355 | C | -2.091875 | -2.092268 | 2.704327  |
| H                                  | -1.369545 | 1.662821  | -1.550785 | C | -3.973228 | -0.485929 | 2.319237  |
| H                                  | -0.095040 | -1.012671 | -2.153027 | C | 1.889456  | -0.677507 | 0.562952  |
| H                                  | 0.508120  | 0.023726  | 1.474759  | C | -2.819619 | -0.072495 | -0.654055 |
| H                                  | -3.303862 | 0.938326  | -1.373993 | C | -3.262149 | 1.219452  | -0.970066 |
| H                                  | -3.419845 | -0.485099 | -0.337903 | C | -4.408411 | 1.337326  | -1.750054 |
| H                                  | -4.311030 | -0.420558 | -1.854781 | C | -5.058618 | 0.219682  | -2.241465 |
| H                                  | -2.520036 | -2.769816 | -1.195527 | C | -4.555549 | -1.042258 | -1.979812 |
| H                                  | -1.594135 | -2.821085 | -2.700020 | C | -3.428788 | -1.219593 | -1.183063 |
| H                                  | -3.338240 | -2.545601 | -2.739617 | C | -2.897367 | -2.627943 | -0.972842 |
| H                                  | -2.091715 | 0.807219  | -3.613364 | C | -3.956976 | -3.570184 | -0.398364 |
| H                                  | -1.374384 | -0.722968 | -4.146946 | C | -2.331061 | -3.186518 | -2.281945 |
| H                                  | -3.129928 | -0.540288 | -4.069998 | C | -2.531212 | 2.485361  | -0.548896 |
| H                                  | 0.952165  | 3.041207  | -0.713084 | C | -2.106142 | 3.300740  | -1.773676 |
| H                                  | 1.486147  | -4.970065 | 0.067656  | C | -3.375064 | 3.336762  | 0.402147  |
| H                                  | -0.251193 | -5.872136 | 1.553595  | C | 2.198988  | -1.421860 | -0.743158 |
| H                                  | -2.044683 | -4.412283 | 2.390297  | C | 2.676668  | 0.612188  | 0.705973  |
| H                                  | -2.452868 | -0.837476 | 1.388984  | C | 3.724272  | 0.685664  | 1.606106  |
| H                                  | -4.650048 | -1.692789 | 2.030685  | C | 4.471526  | 1.858909  | 1.696796  |
| H                                  | -4.097013 | -2.574250 | 0.601649  | C | 4.169223  | 2.946787  | 0.905273  |
| H                                  | -4.022666 | -3.333112 | 2.194373  | C | 3.104662  | 2.875623  | 0.002537  |
| H                                  | -2.993557 | -0.903067 | 3.781548  | C | 2.360373  | 1.707714  | -0.098383 |
| H                                  | -1.255484 | -1.134040 | 3.543720  | C | 3.647702  | -1.839285 | -0.807603 |
| H                                  | -2.286563 | -2.516581 | 3.927563  | C | 4.091412  | -2.947567 | -0.090432 |
| H                                  | 1.609993  | -1.416263 | -1.094268 | C | 5.427709  | -3.320661 | -0.120962 |
| H                                  | 3.908461  | -2.073907 | -0.638765 | C | 6.337648  | -2.588510 | -0.872666 |
| H                                  | 2.999042  | -1.976326 | 0.875668  | C | 5.903442  | -1.484607 | -1.593537 |
| H                                  | 3.374033  | -3.552002 | 0.164989  | C | 4.565844  | -1.113232 | -1.559612 |
| H                                  | 2.741411  | -2.772907 | -2.790711 | O | 2.872086  | 3.992685  | -0.730193 |
| H                                  | 1.013380  | -3.154200 | -2.792098 | C | 1.789969  | 3.973826  | -1.648638 |
| H                                  | 2.163969  | -4.263674 | -2.042469 | H | 0.325845  | 1.133376  | 2.115289  |
| H                                  | 0.502111  | 4.163778  | 1.426110  | H | 0.156084  | -0.502612 | 2.771007  |
| H                                  | -0.115781 | 2.670062  | 2.120147  | H | -1.976819 | 1.235166  | 1.727928  |
| H                                  | 1.988921  | 2.735137  | 2.739018  | H | -0.305639 | -0.856827 | -1.212497 |
| H                                  | 4.264937  | 2.091298  | 3.415611  | H | -2.535329 | 1.072602  | 4.044382  |
| H                                  | 5.834456  | 1.108498  | 1.771075  | H | -1.232425 | -0.076453 | 4.386822  |
| H                                  | 2.827226  | 1.435704  | -1.260855 | H | -2.896813 | -0.493007 | 4.778362  |
| H                                  | -2.389151 | 2.095183  | 1.883543  | H | -2.701813 | -2.609327 | 3.448016  |
| H                                  | -4.620073 | 2.520091  | 0.922609  | H | -1.046524 | -2.239528 | 2.985467  |
| H                                  | -4.899119 | 4.199925  | -0.876120 | H | -2.258684 | -2.586009 | 1.746379  |
| H                                  | -2.928899 | 5.459919  | -1.694442 | H | -4.227458 | -0.968270 | 1.375386  |
| H                                  | -0.701237 | 5.035289  | -0.733700 | H | -4.568769 | -0.957278 | 3.103984  |
| H                                  | 5.890392  | 0.069905  | -2.521460 | H | -4.276362 | 0.562986  | 2.255568  |
| H                                  | 4.165390  | -0.176489 | -2.162231 | H | 2.148370  | -1.332628 | 1.399321  |
| H                                  | 4.782854  | 1.463815  | -2.508187 | H | -4.786754 | 2.323714  | -1.993988 |
| ωB97X energy = -1507.41004090 a.u. |           |           |           | H | -5.948548 | 0.333424  | -2.849557 |
| (5S,1'S)-9a, Conf. M               |           |           |           | H | -5.049182 | -1.910389 | -2.401780 |
| C                                  | -0.104978 | 0.147442  | 1.936814  | H | -2.075841 | -2.588185 | -0.257127 |
| C                                  | -1.629185 | 0.203452  | 1.668394  | H | -3.512895 | -4.545812 | -0.189636 |
| N                                  | -1.687949 | -0.213354 | 0.232505  | H | -4.380975 | -3.184198 | 0.531304  |
| C                                  | -0.485090 | -0.532488 | -0.195763 | H | -4.776485 | -3.723438 | -1.103970 |
| N                                  | 0.454379  | -0.407898 | 0.698308  | H | -1.903860 | -4.177808 | -2.116548 |
|                                    |           |           |           | H | -1.548599 | -2.542201 | -2.690238 |
|                                    |           |           |           | H | -3.114365 | -3.277598 | -3.038409 |

|   |           |           |           |
|---|-----------|-----------|-----------|
| H | -1.610913 | 2.206424  | -0.031946 |
| H | -1.548184 | 4.185204  | -1.457249 |
| H | -1.469803 | 2.712403  | -2.438793 |
| H | -2.970627 | 3.643636  | -2.346315 |
| H | -2.811103 | 4.213142  | 0.728087  |
| H | -3.677475 | 2.776846  | 1.290607  |
| H | -4.283939 | 3.687505  | -0.092609 |
| H | 1.968707  | -0.782426 | -1.599728 |
| H | 1.562350  | -2.309218 | -0.802658 |
| H | 3.965912  | -0.165862 | 2.232572  |
| H | 5.294448  | 1.920273  | 2.399423  |
| H | 4.737464  | 3.867105  | 0.970322  |
| H | 1.534106  | 1.642077  | -0.796536 |
| H | 3.384328  | -3.529007 | 0.493755  |
| H | 5.758233  | -4.187894 | 0.439327  |
| H | 7.381361  | -2.880023 | -0.899335 |
| H | 6.606671  | -0.909998 | -2.185584 |
| H | 4.231366  | -0.247433 | -2.122589 |
| H | 1.936759  | 3.211529  | -2.418998 |
| H | 0.840426  | 3.795645  | -1.135076 |
| H | 1.770030  | 4.956534  | -2.112846 |

ωB97X energy = -1507.40999171 a.u.

(5S,1'S)-9a, Conf. N

|   |           |           |           |
|---|-----------|-----------|-----------|
| C | -0.677846 | 0.276072  | 1.644540  |
| C | 0.702329  | -0.425008 | 1.695762  |
| N | 0.990013  | -0.610447 | 0.237358  |
| C | 0.045907  | -0.042892 | -0.482390 |
| N | -0.895615 | 0.523946  | 0.215748  |
| C | 1.771594  | 0.332496  | 2.517434  |
| C | 3.087050  | -0.452421 | 2.530794  |
| C | 1.251865  | 0.393913  | 3.960898  |
| C | 2.014103  | 1.751719  | 2.002455  |
| C | -2.075083 | 1.245877  | -0.290267 |
| C | 1.985301  | -1.489874 | -0.331626 |
| C | 1.829439  | -2.871425 | -0.152559 |
| C | 2.835684  | -3.703787 | -0.632826 |
| C | 3.927810  | -3.189847 | -1.308589 |
| C | 4.020375  | -1.828510 | -1.537225 |
| C | 3.055351  | -0.947671 | -1.058403 |
| C | 3.192504  | 0.531129  | -1.382184 |
| C | 4.521076  | 1.111968  | -0.894434 |
| C | 3.019568  | 0.774164  | -2.884498 |
| C | 0.601376  | -3.501549 | 0.485817  |
| C | -0.097648 | -4.445761 | -0.496518 |
| C | 0.946232  | -4.229445 | 1.786871  |
| C | -1.677585 | 2.302281  | -1.328289 |
| C | -3.143678 | 0.277880  | -0.767168 |
| C | -3.035827 | -0.371365 | -1.988520 |
| C | -4.020082 | -1.274431 | -2.376032 |
| C | -5.105356 | -1.528531 | -1.560749 |
| C | -5.219790 | -0.873654 | -0.334768 |
| C | -4.237562 | 0.029577  | 0.060936  |
| C | -0.639785 | 3.270877  | -0.811338 |
| C | 0.613384  | 3.360601  | -1.409227 |

|   |           |           |           |
|---|-----------|-----------|-----------|
| C | 1.576182  | 4.234953  | -0.918526 |
| C | 1.294300  | 5.033974  | 0.179288  |
| C | 0.042546  | 4.959687  | 0.778491  |
| C | -0.915160 | 4.085770  | 0.286220  |
| O | -6.315751 | -1.176422 | 0.403132  |
| C | -6.480631 | -0.527119 | 1.655959  |
| H | -1.482761 | -0.351500 | 2.030483  |
| H | -0.687881 | 1.225643  | 2.178250  |
| H | 0.600486  | -1.415591 | 2.139864  |
| H | 0.055836  | -0.070013 | -1.565246 |
| H | 3.545451  | -0.519264 | 1.544494  |
| H | 2.936501  | -1.469736 | 2.903318  |
| H | 3.798419  | 0.042705  | 3.195389  |
| H | 1.053635  | -0.607343 | 4.353041  |
| H | 0.338143  | 0.984643  | 4.054155  |
| H | 2.006879  | 0.858899  | 4.597643  |
| H | 2.439546  | 1.757388  | 0.998494  |
| H | 1.102928  | 2.355638  | 1.982496  |
| H | 2.723386  | 2.259829  | 2.659457  |
| H | -2.461669 | 1.767200  | 0.586705  |
| H | 2.750800  | -4.775572 | -0.493031 |
| H | 4.699057  | -3.855758 | -1.678025 |
| H | 4.861886  | -1.439222 | -2.099202 |
| H | 2.394538  | 1.074509  | -0.875325 |
| H | 4.545731  | 2.188820  | -1.077890 |
| H | 4.667504  | 0.948231  | 0.175275  |
| H | 5.367263  | 0.666047  | -1.422046 |
| H | 3.075045  | 1.843814  | -3.101834 |
| H | 2.058521  | 0.400306  | -3.247256 |
| H | 3.806959  | 0.276263  | -3.455496 |
| H | -0.118931 | -2.715545 | 0.717204  |
| H | -1.016694 | -4.832607 | -0.051133 |
| H | -0.357291 | -3.929605 | -1.423325 |
| H | 0.535230  | -5.299455 | -0.749456 |
| H | 0.041955  | -4.637739 | 2.242873  |
| H | 1.422836  | -3.565031 | 2.512219  |
| H | 1.631165  | -5.059826 | 1.598762  |
| H | -2.593291 | 2.831562  | -1.602188 |
| H | -1.315492 | 1.824470  | -2.241655 |
| H | -2.200823 | -0.181721 | -2.653193 |
| H | -3.938364 | -1.781784 | -3.330187 |
| H | -5.878654 | -2.228108 | -1.855000 |
| H | -4.313300 | 0.548283  | 1.008469  |
| H | 0.838624  | 2.751812  | -2.280398 |
| H | 2.546818  | 4.291868  | -1.399463 |
| H | 2.042632  | 5.717601  | 0.563211  |
| H | -0.190020 | 5.588394  | 1.630478  |
| H | -1.892428 | 4.045655  | 0.757947  |
| H | -7.408821 | -0.909955 | 2.072526  |
| H | -5.655726 | -0.761519 | 2.334192  |
| H | -6.558059 | 0.556312  | 1.531646  |

ωB97X energy = -1507.40988076 a.u.

(5S,1'S)-9a, Conf. O

|   |           |          |           |
|---|-----------|----------|-----------|
| C | -0.927324 | 0.925452 | -1.465997 |
|---|-----------|----------|-----------|

|   |           |           |           |
|---|-----------|-----------|-----------|
| C | -0.974913 | -0.620432 | -1.489125 |
| N | -0.475092 | -0.951419 | -0.114753 |
| C | 0.035072  | 0.135421  | 0.429816  |
| N | -0.140348 | 1.222976  | -0.263134 |
| C | -2.325988 | -1.212687 | -1.940395 |
| C | -3.495866 | -0.810543 | -1.042893 |
| C | -2.234368 | -2.740160 | -2.022165 |
| C | -2.572907 | -0.675084 | -3.357813 |
| C | 0.361823  | 2.561821  | 0.103032  |
| C | -0.046456 | -2.263813 | 0.321161  |
| C | 1.120755  | -2.803225 | -0.237961 |
| C | 1.476718  | -4.095808 | 0.134417  |
| C | 0.728644  | -4.805379 | 1.057579  |
| C | -0.375214 | -4.219382 | 1.651990  |
| C | -0.783308 | -2.935000 | 1.304817  |
| C | -1.952631 | -2.305056 | 2.041318  |
| C | -3.221607 | -3.154681 | 1.952028  |
| C | -1.583044 | -2.042513 | 3.504612  |
| C | 2.041657  | -2.026485 | -1.167646 |
| C | 3.410750  | -1.812040 | -0.514106 |
| C | 2.183693  | -2.703716 | -2.531778 |
| C | -0.565954 | 3.243209  | 1.114161  |
| C | 1.817222  | 2.441763  | 0.534711  |
| C | 2.234092  | 2.660948  | 1.844396  |
| C | 3.568185  | 2.472465  | 2.176067  |
| C | 4.497470  | 2.064886  | 1.230129  |
| C | 4.079461  | 1.852472  | -0.082253 |
| C | 2.744032  | 2.047001  | -0.420602 |
| C | -1.985772 | 3.349245  | 0.615558  |
| C | -2.976614 | 2.505965  | 1.109236  |
| C | -4.273792 | 2.569933  | 0.615050  |
| C | -4.594280 | 3.479713  | -0.382073 |
| C | -3.613622 | 4.331877  | -0.876108 |
| C | -2.320424 | 4.267025  | -0.378738 |
| O | 4.894459  | 1.457485  | -1.091558 |
| C | 6.254073  | 1.183700  | -0.782067 |
| H | -0.437748 | 1.341655  | -2.344859 |
| H | -1.917349 | 1.373233  | -1.364951 |
| H | -0.222839 | -0.996129 | -2.189334 |
| H | 0.586677  | 0.112797  | 1.362819  |
| H | -3.652434 | 0.269927  | -1.017213 |
| H | -3.362874 | -1.156206 | -0.017811 |
| H | -4.413520 | -1.261723 | -1.426678 |
| H | -2.124578 | -3.204641 | -1.041828 |
| H | -1.388822 | -3.054088 | -2.640979 |
| H | -3.145304 | -3.134958 | -2.477156 |
| H | -2.701600 | 0.409986  | -3.370585 |
| H | -1.749992 | -0.932323 | -4.030326 |
| H | -3.485503 | -1.118057 | -3.761106 |
| H | 0.331666  | 3.127733  | -0.831004 |
| H | 2.367028  | -4.546490 | -0.289879 |
| H | 1.022391  | -5.811478 | 1.334040  |
| H | -0.927959 | -4.767741 | 2.406527  |
| H | -2.161236 | -1.337009 | 1.584154  |
| H | -4.055701 | -2.632698 | 2.426296  |
| H | -3.498112 | -3.363681 | 0.916211  |

|   |           |           |           |
|---|-----------|-----------|-----------|
| H | -3.094940 | -4.110907 | 2.464876  |
| H | -2.408343 | -1.542931 | 4.016822  |
| H | -0.696237 | -1.410194 | 3.587959  |
| H | -1.378297 | -2.978964 | 4.029660  |
| H | 1.625063  | -1.032298 | -1.336149 |
| H | 4.037362  | -1.185158 | -1.153557 |
| H | 3.312764  | -1.312913 | 0.453616  |
| H | 3.926951  | -2.761849 | -0.355626 |
| H | 2.810410  | -2.097735 | -3.189267 |
| H | 1.213823  | -2.841729 | -3.016554 |
| H | 2.651373  | -3.686392 | -2.435759 |
| H | -0.159909 | 4.237249  | 1.315716  |
| H | -0.551877 | 2.689247  | 2.055741  |
| H | 1.535823  | 2.975476  | 2.609153  |
| H | 3.894164  | 2.641512  | 3.195809  |
| H | 5.529351  | 1.920555  | 1.520833  |
| H | 2.444962  | 1.873313  | -1.449747 |
| H | -2.733662 | 1.790515  | 1.889416  |
| H | -5.033498 | 1.904406  | 1.009373  |
| H | -5.605041 | 3.530655  | -0.770139 |
| H | -3.858810 | 5.052218  | -1.648202 |
| H | -1.561864 | 4.940929  | -0.765574 |
| H | 6.715595  | 0.864338  | -1.713014 |
| H | 6.762991  | 2.077596  | -0.412399 |
| H | 6.334691  | 0.382810  | -0.041796 |

ωB97X energy = -1507.40984795 a.u.

(5S,1'S)-9a, Conf. P

|   |           |           |           |
|---|-----------|-----------|-----------|
| C | 0.253970  | -0.939296 | -1.800439 |
| C | 0.810158  | 0.498669  | -1.664417 |
| N | 0.636288  | 0.744117  | -0.195375 |
| C | -0.092379 | -0.221021 | 0.323845  |
| N | -0.380942 | -1.185987 | -0.501111 |
| C | 2.211025  | 0.698329  | -2.281316 |
| C | 2.644439  | 2.163452  | -2.164805 |
| C | 2.065051  | 0.363356  | -3.773430 |
| C | 3.279082  | -0.206845 | -1.668440 |
| C | -1.109210 | -2.415236 | -0.153161 |
| C | 0.763658  | 2.021207  | 0.472681  |
| C | -0.200779 | 3.005934  | 0.220144  |
| C | -0.028740 | 4.247240  | 0.824986  |
| C | 1.034085  | 4.484822  | 1.678989  |
| C | 1.931357  | 3.471295  | 1.968007  |
| C | 1.813031  | 2.215908  | 1.379789  |
| C | 2.772741  | 1.111480  | 1.787042  |
| C | 4.236769  | 1.508733  | 1.592338  |
| C | 2.517401  | 0.685097  | 3.235848  |
| C | -1.447832 | 2.759585  | -0.615547 |
| C | -2.705544 | 2.846746  | 0.254761  |
| C | -1.534780 | 3.709383  | -1.810782 |
| C | -0.320836 | -3.247699 | 0.870322  |
| C | -2.534957 | -2.074209 | 0.274753  |
| C | -3.158882 | -2.720919 | 1.339712  |
| C | -4.458074 | -2.380135 | 1.683593  |
| C | -5.157730 | -1.401416 | 0.991690  |

|   |           |           |           |
|---|-----------|-----------|-----------|
| C | -4.536777 | -0.759965 | -0.076439 |
| C | -3.233965 | -1.102333 | -0.427908 |
| C | 1.139437  | -3.403027 | 0.520350  |
| C | 2.116943  | -2.754605 | 1.270540  |
| C | 3.462866  | -2.880622 | 0.949606  |
| C | 3.848424  | -3.659836 | -0.131130 |
| C | 2.881742  | -4.313519 | -0.886063 |
| C | 1.538504  | -4.186146 | -0.561769 |
| O | -5.115014 | 0.207123  | -0.832050 |
| C | -6.420287 | 0.640510  | -0.476117 |
| H | -0.479522 | -1.029575 | -2.600453 |
| H | 1.039846  | -1.680506 | -1.955967 |
| H | 0.142370  | 1.196945  | -2.177023 |
| H | -0.442661 | -0.193448 | 1.349283  |
| H | 2.828032  | 2.462460  | -1.132354 |
| H | 1.891041  | 2.836638  | -2.583820 |
| H | 3.571449  | 2.312349  | -2.722659 |
| H | 1.298610  | 0.982820  | -4.247005 |
| H | 1.808947  | -0.686202 | -3.937690 |
| H | 3.011814  | 0.552504  | -4.282659 |
| H | 3.438247  | 0.002044  | -0.611109 |
| H | 3.042925  | -1.268961 | -1.766401 |
| H | 4.228263  | -0.039258 | -2.182351 |
| H | -1.159080 | -2.975565 | -1.089807 |
| H | -0.752345 | 5.033669  | 0.641448  |
| H | 1.149656  | 5.458018  | 2.141961  |
| H | 2.735203  | 3.655538  | 2.671904  |
| H | 2.576832  | 0.241222  | 1.159532  |
| H | 4.885740  | 0.656759  | 1.808741  |
| H | 4.436103  | 1.834586  | 0.569016  |
| H | 4.521574  | 2.320649  | 2.265459  |
| H | 3.173788  | -0.146691 | 3.503998  |
| H | 1.483119  | 0.365953  | 3.386790  |
| H | 2.717190  | 1.506933  | 3.928101  |
| H | -1.418520 | 1.742147  | -1.007797 |
| H | -3.588193 | 2.585679  | -0.334449 |
| H | -2.649394 | 2.155782  | 1.099752  |
| H | -2.844785 | 3.855581  | 0.650809  |
| H | -2.413747 | 3.474152  | -2.414494 |
| H | -0.651563 | 3.633509  | -2.449917 |
| H | -1.622694 | 4.748041  | -1.483698 |
| H | -0.794035 | -4.229565 | 0.935659  |
| H | -0.410111 | -2.786494 | 1.857325  |
| H | -2.645763 | -3.484276 | 1.909301  |
| H | -4.938110 | -2.881996 | 2.515765  |
| H | -6.167915 | -1.152767 | 1.287959  |
| H | -2.787678 | -0.580533 | -1.267457 |
| H | 1.825115  | -2.155430 | 2.129160  |
| H | 4.208934  | -2.368485 | 1.547924  |
| H | 4.897597  | -3.762733 | -0.382949 |
| H | 3.175827  | -4.930522 | -1.727524 |
| H | 0.792762  | -4.710439 | -1.151954 |
| H | -6.683205 | 1.417944  | -1.189028 |
| H | -7.143061 | -0.176339 | -0.548736 |
| H | -6.435385 | 1.054464  | 0.535830  |

ωB97X energy = -1507.40975963 a.u.

(5S,1'S)-**9a**, Conf. Q

|   |           |           |           |
|---|-----------|-----------|-----------|
| C | -0.179368 | -0.140297 | 1.969981  |
| C | -1.674728 | 0.117137  | 1.660668  |
| N | -1.749424 | -0.267044 | 0.216756  |
| C | -0.560365 | -0.637275 | -0.213108 |
| N | 0.369551  | -0.625038 | 0.698343  |
| C | -2.656696 | -0.585210 | 2.624895  |
| C | -2.482130 | -2.103526 | 2.649545  |
| C | -4.102579 | -0.234895 | 2.259569  |
| C | -2.372526 | -0.013250 | 4.021100  |
| C | 1.800576  | -0.909398 | 0.550520  |
| C | -2.821594 | 0.072497  | -0.692135 |
| C | -3.028167 | 1.424672  | -1.000115 |
| C | -4.111941 | 1.744067  | -1.812109 |
| C | -4.928388 | 0.758053  | -2.336958 |
| C | -4.658156 | -0.573680 | -2.076856 |
| C | -3.600535 | -0.948268 | -1.253565 |
| C | -3.319480 | -2.427154 | -1.046851 |
| C | -4.532822 | -3.176207 | -0.492287 |
| C | -2.839938 | -3.070553 | -2.351587 |
| C | -2.106182 | 2.543098  | -0.538326 |
| C | -1.490598 | 3.272334  | -1.735805 |
| C | -2.825106 | 3.526109  | 0.388036  |
| C | 2.097000  | -1.660807 | -0.753595 |
| C | 2.596257  | 0.377709  | 0.683955  |
| C | 3.622187  | 0.469531  | 1.619682  |
| C | 4.360363  | 1.638637  | 1.710510  |
| C | 4.089477  | 2.724762  | 0.887859  |
| C | 3.059382  | 2.630219  | -0.044563 |
| C | 2.318342  | 1.454411  | -0.141809 |
| C | 3.540854  | -2.096408 | -0.814950 |
| C | 4.467880  | -1.388642 | -1.573486 |
| C | 5.801248  | -1.775747 | -1.602577 |
| C | 6.222224  | -2.877230 | -0.870397 |
| C | 5.303287  | -3.591340 | -0.112202 |
| C | 3.971488  | -3.202465 | -0.086270 |
| O | 2.703982  | 3.623809  | -0.896930 |
| C | 3.429458  | 4.844166  | -0.838661 |
| H | 0.348284  | 0.764735  | 2.272256  |
| H | -0.030834 | -0.902861 | 2.734263  |
| H | -1.884993 | 1.186070  | 1.724000  |
| H | -0.383979 | -0.908316 | -1.246249 |
| H | -1.475680 | -2.404841 | 2.948555  |
| H | -2.696873 | -2.553551 | 1.679765  |
| H | -3.177095 | -2.535783 | 3.372488  |
| H | -4.407069 | -0.664908 | 1.305447  |
| H | -4.246926 | 0.847794  | 2.203596  |
| H | -4.775900 | -0.621417 | 3.027710  |
| H | -1.366978 | -0.252988 | 4.374149  |
| H | -2.489531 | 1.073876  | 4.033339  |
| H | -3.080152 | -0.434211 | 4.737803  |
| H | 2.058846  | -1.563856 | 1.387306  |
| H | -4.307328 | 2.782829  | -2.053808 |
| H | -5.765655 | 1.027932  | -2.970183 |



|   |           |           |           |
|---|-----------|-----------|-----------|
| H | -5.281365 | -1.340508 | -2.522904 |
| H | -2.510839 | -2.526427 | -0.322322 |
| H | -4.269509 | -4.217056 | -0.291832 |
| H | -4.893675 | -2.733190 | 0.438547  |
| H | -5.358912 | -3.175687 | -1.206930 |
| H | -2.597566 | -4.122319 | -2.185153 |
| H | -1.949546 | -2.573538 | -2.743436 |
| H | -3.615518 | -3.021563 | -3.119902 |
| H | -1.270526 | 2.110587  | 0.014200  |
| H | -0.773544 | 4.019542  | -1.388253 |
| H | -0.965288 | 2.576836  | -2.394140 |
| H | -2.252531 | 3.787932  | -2.324749 |
| H | -3.639117 | 4.032434  | -0.136450 |
| H | -2.128971 | 4.288899  | 0.742788  |
| H | -3.254338 | 3.025301  | 1.259696  |
| H | 1.877599  | -1.021042 | -1.612329 |
| H | 1.446374  | -2.537828 | -0.810684 |
| H | 3.842749  | -0.369359 | 2.270551  |
| H | 5.160210  | 1.714792  | 2.437975  |
| H | 4.677241  | 3.627825  | 0.983499  |
| H | 1.525573  | 1.414055  | -0.882896 |
| H | 4.143900  | -0.524883 | -2.145536 |
| H | 6.511480  | -1.215073 | -2.199632 |
| H | 7.262557  | -3.180931 | -0.893107 |
| H | 5.623459  | -4.456585 | 0.457107  |
| H | 3.257367  | -3.769772 | 0.503228  |
| H | 2.994256  | 5.489040  | -1.597886 |
| H | 3.327373  | 5.317054  | 0.141662  |
| H | 4.487887  | 4.684766  | -1.060439 |

ωB97X energy = -1507.40974216 a.u.

(5*S*,1'*S*)-**9a**, Conf. R

|   |           |           |           |
|---|-----------|-----------|-----------|
| C | 0.157083  | -2.134713 | 0.852426  |
| C | 1.618212  | -1.649119 | 1.023977  |
| N | 1.687601  | -0.581323 | -0.022295 |
| C | 0.486321  | -0.347297 | -0.498338 |
| N | -0.454377 | -1.098025 | 0.007570  |
| C | 1.982341  | -1.217692 | 2.465598  |
| C | 3.422016  | -0.697163 | 2.528538  |
| C | 1.907991  | -2.482057 | 3.333368  |
| C | 1.028359  | -0.159265 | 3.022101  |
| C | -1.872763 | -1.054477 | -0.404632 |
| C | 2.870326  | 0.073781  | -0.526491 |
| C | 3.818638  | -0.697329 | -1.212110 |
| C | 4.989533  | -0.068578 | -1.623845 |
| C | 5.188912  | 1.283618  | -1.412634 |
| C | 4.204722  | 2.038155  | -0.799324 |
| C | 3.026690  | 1.456705  | -0.341228 |
| C | 1.975369  | 2.355305  | 0.293609  |
| C | 2.527407  | 3.140901  | 1.484992  |
| C | 1.370664  | 3.305275  | -0.745508 |
| C | 3.609439  | -2.161330 | -1.565539 |
| C | 3.717742  | -2.383315 | -3.076663 |
| C | 4.587068  | -3.069664 | -0.816397 |
| C | -2.767305 | -1.590125 | 0.723561  |

|   |           |           |           |
|---|-----------|-----------|-----------|
| C | -2.235863 | 0.358545  | -0.815411 |
| C | -2.706699 | 0.612472  | -2.089889 |
| C | -3.040309 | 1.917949  | -2.452998 |
| C | -2.892090 | 2.954856  | -1.557920 |
| C | -2.409241 | 2.699977  | -0.270306 |
| C | -2.089964 | 1.402556  | 0.103767  |
| C | -4.219289 | -1.599618 | 0.313661  |
| C | -4.694841 | -2.567962 | -0.567758 |
| C | -6.022098 | -2.565848 | -0.972844 |
| C | -6.893817 | -1.594332 | -0.497640 |
| C | -6.430128 | -0.628205 | 0.384445  |
| C | -5.100387 | -0.631259 | 0.784881  |
| O | -2.282796 | 3.780206  | 0.539540  |
| C | -1.801671 | 3.573931  | 1.859110  |
| H | 0.097347  | -3.097534 | 0.342030  |
| H | -0.365078 | -2.209330 | 1.802249  |
| H | 2.308133  | -2.443412 | 0.741268  |
| H | 0.295634  | 0.403970  | -1.253745 |
| H | 3.548929  | 0.249202  | 2.003603  |
| H | 4.126447  | -1.417496 | 2.103827  |
| H | 3.700731  | -0.536393 | 3.572142  |
| H | 2.191525  | -2.235625 | 4.358322  |
| H | 2.597190  | -3.249148 | 2.970203  |
| H | 0.905339  | -2.913214 | 3.367586  |
| H | -0.007287 | -0.505835 | 3.058662  |
| H | 1.319510  | 0.090946  | 4.044340  |
| H | 1.059870  | 0.764131  | 2.441342  |
| H | -1.984722 | -1.713414 | -1.270479 |
| H | 5.748872  | -0.645278 | -2.139974 |
| H | 6.105380  | 1.756065  | -1.746502 |
| H | 4.355622  | 3.103740  | -0.668878 |
| H | 1.162220  | 1.733367  | 0.670657  |
| H | 1.727132  | 3.717483  | 1.955582  |
| H | 2.956902  | 2.480224  | 2.241180  |
| H | 3.301092  | 3.845750  | 1.173198  |
| H | 0.570376  | 3.899037  | -0.295513 |
| H | 0.950948  | 2.764356  | -1.597700 |
| H | 2.125530  | 3.995333  | -1.129860 |
| H | 2.593196  | -2.444459 | -1.287777 |
| H | 3.478823  | -3.421578 | -3.316634 |
| H | 3.027167  | -1.737860 | -3.622975 |
| H | 4.728437  | -2.183673 | -3.439438 |
| H | 4.390365  | -4.117280 | -1.053502 |
| H | 4.511665  | -2.947111 | 0.266760  |
| H | 5.618372  | -2.848114 | -1.102084 |
| H | -2.635148 | -0.977776 | 1.619042  |
| H | -2.458438 | -2.608342 | 0.970840  |
| H | -2.814691 | -0.197059 | -2.802858 |
| H | -3.413358 | 2.120537  | -3.450114 |
| H | -3.137758 | 3.974566  | -1.829811 |
| H | -1.719148 | 1.191671  | 1.099967  |
| H | -4.021186 | -3.335612 | -0.937277 |
| H | -6.377602 | -3.326865 | -1.658287 |
| H | -7.931478 | -1.593203 | -0.811173 |
| H | -7.105198 | 0.131122  | 0.762705  |
| H | -4.741941 | 0.128714  | 1.472104  |

|   |           |          |          |
|---|-----------|----------|----------|
| H | -2.468148 | 2.918610 | 2.426346 |
| H | -0.792931 | 3.147982 | 1.851023 |
| H | -1.773038 | 4.554511 | 2.327004 |

ωB97X energy = -1507.40973913 a.u.

(5S,1'S)-9a, Conf. S

|   |           |           |           |
|---|-----------|-----------|-----------|
| C | -0.137391 | 0.778156  | 1.555139  |
| C | -1.661412 | 0.944259  | 1.337272  |
| N | -1.906111 | -0.010938 | 0.212250  |
| C | -0.773150 | -0.572416 | -0.157001 |
| N | 0.261137  | -0.210576 | 0.546931  |
| C | -2.512315 | 0.759150  | 2.614010  |
| C | -2.055551 | 1.846226  | 3.597303  |
| C | -2.329509 | -0.616621 | 3.253946  |
| C | -3.994311 | 0.996947  | 2.306277  |
| C | 1.658780  | -0.632805 | 0.409128  |
| C | -3.095232 | -0.059784 | -0.608378 |
| C | -3.385621 | 1.041843  | -1.425386 |
| C | -4.577898 | 1.019061  | -2.141999 |
| C | -5.423423 | -0.074936 | -2.089193 |
| C | -5.075400 | -1.181665 | -1.335178 |
| C | -3.906080 | -1.202632 | -0.580933 |
| C | -3.547133 | -2.466078 | 0.182648  |
| C | -4.646352 | -2.886258 | 1.160130  |
| C | -3.225564 | -3.605193 | -0.789668 |
| C | -2.444588 | 2.223063  | -1.606436 |
| C | -2.035177 | 2.372366  | -3.074499 |
| C | -3.053316 | 3.523613  | -1.077729 |
| C | 1.794026  | -1.819885 | -0.553614 |
| C | 2.511170  | 0.555176  | 0.001264  |
| C | 2.193617  | 1.296167  | -1.137888 |
| C | 3.003774  | 2.352075  | -1.510472 |
| C | 4.132978  | 2.689608  | -0.769293 |
| C | 4.443469  | 1.951500  | 0.366375  |
| C | 3.624949  | 0.885459  | 0.748520  |
| C | 3.206078  | -2.351891 | -0.574219 |
| C | 3.642550  | -3.223763 | 0.419768  |
| C | 4.948979  | -3.692639 | 0.425582  |
| C | 5.835882  | -3.293477 | -0.565684 |
| C | 5.408445  | -2.426697 | -1.562356 |
| C | 4.101149  | -1.959672 | -1.565126 |
| O | 5.510435  | 2.189285  | 1.168321  |
| C | 6.372638  | 3.265991  | 0.828582  |
| H | 0.412143  | 1.705778  | 1.394769  |
| H | 0.109133  | 0.393631  | 2.544717  |
| H | -1.871812 | 1.946774  | 0.961808  |
| H | -0.720743 | -1.265470 | -0.986788 |
| H | -2.168886 | 2.843440  | 3.163380  |
| H | -1.014124 | 1.721691  | 3.902104  |
| H | -2.667857 | 1.801524  | 4.499890  |
| H | -1.291965 | -0.814004 | 3.532467  |
| H | -2.662857 | -1.418698 | 2.594981  |
| H | -2.925050 | -0.673193 | 4.167561  |
| H | -4.148445 | 1.967847  | 1.826830  |
| H | -4.414171 | 0.229562  | 1.655697  |

|   |           |           |           |
|---|-----------|-----------|-----------|
| H | -4.563780 | 0.991233  | 3.238141  |
| H | 1.970783  | -0.961535 | 1.404578  |
| H | -4.838501 | 1.864284  | -2.769240 |
| H | -6.346903 | -0.074487 | -2.656642 |
| H | -5.725336 | -2.049570 | -1.332609 |
| H | -2.644571 | -2.274020 | 0.763574  |
| H | -4.321887 | -3.756811 | 1.734463  |
| H | -4.890172 | -2.088118 | 1.864866  |
| H | -5.562957 | -3.159976 | 0.632826  |
| H | -2.908269 | -4.493308 | -0.239022 |
| H | -2.427209 | -3.329688 | -1.482801 |
| H | -4.104018 | -3.872442 | -1.382395 |
| H | -1.524146 | 2.030229  | -1.052518 |
| H | -1.296232 | 3.170296  | -3.175359 |
| H | -1.595952 | 1.449122  | -3.458349 |
| H | -2.890576 | 2.628044  | -3.703842 |
| H | -2.340000 | 4.343965  | -1.180499 |
| H | -3.331719 | 3.445233  | -0.023711 |
| H | -3.953113 | 3.788006  | -1.638471 |
| H | 1.506542  | -1.511945 | -1.562331 |
| H | 1.111740  | -2.612606 | -0.234737 |
| H | 1.318270  | 1.052534  | -1.731624 |
| H | 2.762259  | 2.930689  | -2.394680 |
| H | 4.749109  | 3.520670  | -1.084980 |
| H | 3.886235  | 0.323759  | 1.639227  |
| H | 2.951484  | -3.544793 | 1.193445  |
| H | 5.273551  | -4.374805 | 1.203122  |
| H | 6.855791  | -3.660755 | -0.563334 |
| H | 6.094525  | -2.113179 | -2.340977 |
| H | 3.772202  | -1.279358 | -2.344395 |
| H | 7.147413  | 3.281981  | 1.590842  |
| H | 6.830707  | 3.110620  | -0.151828 |
| H | 5.836338  | 4.218666  | 0.835666  |

ωB97X energy = -1507.40966062 a.u.

(5S,1'S)-9a, Conf. T

|   |           |           |           |
|---|-----------|-----------|-----------|
| C | -0.226532 | 0.777102  | -1.981802 |
| C | -1.350843 | -0.231353 | -1.645967 |
| N | -1.025387 | -0.572171 | -0.223060 |
| C | 0.140981  | -0.053535 | 0.098247  |
| N | 0.670094  | 0.698016  | -0.824336 |
| C | -2.773541 | 0.274409  | -1.971766 |
| C | -3.811494 | -0.813168 | -1.676238 |
| C | -2.785977 | 0.543979  | -3.484148 |
| C | -3.146456 | 1.557982  | -1.230890 |
| C | 1.912561  | 1.477380  | -0.698342 |
| C | -1.622717 | -1.635563 | 0.553214  |
| C | -1.360025 | -2.961857 | 0.185337  |
| C | -1.998675 | -3.969038 | 0.902264  |
| C | -2.827626 | -3.671357 | 1.969620  |
| C | -3.013623 | -2.355800 | 2.356443  |
| C | -2.414326 | -1.309265 | 1.662270  |
| C | -2.602379 | 0.112459  | 2.162319  |
| C | -4.078585 | 0.486737  | 2.305993  |
| C | -1.859376 | 0.320406  | 3.485107  |

|   |           |           |           |
|---|-----------|-----------|-----------|
| C | -0.374312 | -3.348167 | -0.906638 |
| C | 0.786286  | -4.158467 | -0.322114 |
| C | -1.055006 | -4.107862 | -2.046486 |
| C | 1.796860  | 2.521318  | 0.419611  |
| C | 3.106905  | 0.537332  | -0.585052 |
| C | 3.234787  | -0.499935 | -1.515393 |
| C | 4.312746  | -1.358695 | -1.445466 |
| C | 5.288175  | -1.211412 | -0.461820 |
| C | 5.163437  | -0.180297 | 0.457897  |
| C | 4.070315  | 0.690605  | 0.393555  |
| C | 0.530073  | 3.339061  | 0.345462  |
| C | -0.448900 | 3.204622  | 1.325524  |
| C | -1.625776 | 3.940605  | 1.264491  |
| C | -1.837392 | 4.824704  | 0.217219  |
| C | -0.865114 | 4.970438  | -0.765419 |
| C | 0.309154  | 4.233908  | -0.700758 |
| O | 6.044751  | 0.066616  | 1.459020  |
| C | 7.177648  | -0.782737 | 1.572894  |
| H | 0.311183  | 0.513757  | -2.891816 |
| H | -0.594665 | 1.800101  | -2.074081 |
| H | -1.205293 | -1.146454 | -2.225599 |
| H | 0.623034  | -0.257197 | 1.047861  |
| H | -3.911314 | -1.014737 | -0.609046 |
| H | -3.557734 | -1.751816 | -2.177023 |
| H | -4.787605 | -0.492371 | -2.046589 |
| H | -2.514880 | -0.352007 | -4.049290 |
| H | -2.101937 | 1.347873  | -3.766646 |
| H | -3.789465 | 0.843941  | -3.791619 |
| H | -3.190670 | 1.411249  | -0.152333 |
| H | -2.453840 | 2.379455  | -1.428202 |
| H | -4.135974 | 1.885584  | -1.557647 |
| H | 1.993849  | 2.005672  | -1.651029 |
| H | -1.826403 | -5.005572 | 0.634579  |
| H | -3.313359 | -4.470971 | 2.516922  |
| H | -3.633865 | -2.135834 | 3.218072  |
| H | -2.158377 | 0.793289  | 1.435323  |
| H | -4.172112 | 1.546116  | 2.556837  |
| H | -4.632149 | 0.308002  | 1.381348  |
| H | -4.560087 | -0.085455 | 3.102186  |
| H | -1.977345 | 1.352082  | 3.826269  |
| H | -0.790756 | 0.115259  | 3.381598  |
| H | -2.252068 | -0.338342 | 4.263643  |
| H | 0.065957  | -2.441316 | -1.324645 |
| H | 1.522551  | -4.372799 | -1.100015 |
| H | 1.286172  | -3.610010 | 0.479580  |
| H | 0.440477  | -5.111633 | 0.084496  |
| H | -0.332028 | -4.337552 | -2.831782 |
| H | -1.868077 | -3.528068 | -2.490276 |
| H | -1.475321 | -5.051759 | -1.691338 |
| H | 2.669301  | 3.175184  | 0.352415  |
| H | 1.847224  | 2.025962  | 1.392633  |
| H | 2.490853  | -0.633615 | -2.293256 |
| H | 4.409534  | -2.160406 | -2.168528 |
| H | 6.122887  | -1.898390 | -0.429652 |
| H | 4.017848  | 1.478576  | 1.134226  |
| H | -0.282638 | 2.526386  | 2.158069  |

|   |           |           |           |
|---|-----------|-----------|-----------|
| H | -2.376001 | 3.822438  | 2.039161  |
| H | -2.754073 | 5.400746  | 0.166029  |
| H | -1.019441 | 5.666071  | -1.582436 |
| H | 1.066329  | 4.365135  | -1.468351 |
| H | 7.745937  | -0.413050 | 2.422625  |
| H | 6.878528  | -1.817814 | 1.758607  |
| H | 7.797343  | -0.736784 | 0.673312  |

ωB97X energy = -1507.40964435 a.u.

(5S,1'R)-**9b**, Conf. A

|   |           |           |           |
|---|-----------|-----------|-----------|
| C | -0.897321 | 0.383153  | 1.470430  |
| C | 0.247051  | -0.657217 | 1.549095  |
| N | 0.827831  | -0.564788 | 0.171417  |
| C | 0.060552  | 0.195301  | -0.580273 |
| N | -0.941669 | 0.741901  | 0.048793  |
| C | 1.204446  | -0.464924 | 2.745372  |
| C | 2.276073  | -1.560928 | 2.762339  |
| C | 0.346337  | -0.624858 | 4.008352  |
| C | 1.873046  | 0.910327  | 2.762051  |
| C | -1.904970 | 1.683969  | -0.531815 |
| C | 1.798958  | -1.475579 | -0.392033 |
| C | 1.419525  | -2.807964 | -0.607604 |
| C | 2.397406  | -3.695355 | -1.045151 |
| C | 3.687433  | -3.266754 | -1.304675 |
| C | 4.012515  | -1.929325 | -1.164750 |
| C | 3.077911  | -1.002075 | -0.713211 |
| C | 3.474559  | 0.463507  | -0.647012 |
| C | 4.685758  | 0.697448  | 0.258087  |
| C | 3.745944  | 1.003553  | -2.054626 |
| C | -0.007961 | -3.310346 | -0.449040 |
| C | -0.544590 | -3.836164 | -1.783860 |
| C | -0.129301 | -4.376007 | 0.641633  |
| C | -1.609504 | 3.117492  | -0.074366 |
| C | -3.316839 | 1.186491  | -0.251809 |
| C | -4.273265 | 1.966344  | 0.373152  |
| C | -5.550563 | 1.446698  | 0.588993  |
| C | -5.868443 | 0.164897  | 0.197778  |
| C | -4.901313 | -0.627137 | -0.427986 |
| C | -3.634096 | -0.113544 | -0.657535 |
| C | -0.201830 | 3.546452  | -0.408208 |
| C | 0.747962  | 3.714282  | 0.593790  |
| C | 2.053396  | 4.079106  | 0.286195  |
| C | 2.422086  | 4.287407  | -1.034358 |
| C | 1.480152  | 4.129140  | -2.044137 |
| C | 0.179781  | 3.761301  | -1.732657 |
| O | -5.290961 | -1.878568 | -0.776950 |
| C | -4.317504 | -2.747362 | -1.336180 |
| H | -1.857466 | -0.024870 | 1.783010  |
| H | -0.685441 | 1.276111  | 2.060490  |
| H | -0.179451 | -1.658670 | 1.645914  |
| H | 0.236562  | 0.334082  | -1.640374 |
| H | 2.999892  | -1.452805 | 1.954214  |
| H | 1.830358  | -2.556442 | 2.685912  |
| H | 2.823018  | -1.513307 | 3.706333  |

|                                            |           |           |           |   |           |           |           |
|--------------------------------------------|-----------|-----------|-----------|---|-----------|-----------|-----------|
| H                                          | -0.127104 | -1.609649 | 4.043933  | C | 4.695938  | -0.892854 | -0.928440 |
| H                                          | -0.436176 | 0.134856  | 4.074794  | C | 3.492993  | -0.290734 | -0.571142 |
| H                                          | 0.977710  | -0.523607 | 4.893098  | C | 3.441597  | 1.224145  | -0.454378 |
| H                                          | 2.378121  | 1.134810  | 1.821734  | C | 4.438151  | 1.760760  | 0.575321  |
| H                                          | 1.161537  | 1.713137  | 2.964319  | C | 3.686483  | 1.870870  | -1.821323 |
| H                                          | 2.621161  | 0.938707  | 3.556954  | C | 1.203352  | -3.401513 | -0.624168 |
| H                                          | -1.740552 | 1.632322  | -1.611355 | C | 0.972457  | -4.021424 | -2.005492 |
| H                                          | 2.140467  | -4.736641 | -1.204362 | C | 1.302452  | -4.488050 | 0.448448  |
| H                                          | 4.435407  | -3.974149 | -1.643565 | C | -2.162033 | 2.369914  | -0.304335 |
| H                                          | 5.013630  | -1.595557 | -1.413716 | C | -3.238615 | 0.078306  | -0.821704 |
| H                                          | 2.639470  | 1.036090  | -0.238736 | C | -3.212197 | -1.140815 | -1.505103 |
| H                                          | 4.876387  | 1.769210  | 0.353727  | C | -4.316873 | -1.968370 | -1.476422 |
| H                                          | 4.530484  | 0.290716  | 1.259681  | C | -5.466016 | -1.608928 | -0.776033 |
| H                                          | 5.584675  | 0.235225  | -0.156682 | C | -5.491398 | -0.397397 | -0.099228 |
| H                                          | 3.986863  | 2.067506  | -2.007126 | C | -4.373769 | 0.443095  | -0.123858 |
| H                                          | 2.877244  | 0.882514  | -2.706238 | C | -0.893354 | 3.182450  | -0.398957 |
| H                                          | 4.589274  | 0.484965  | -2.517512 | C | -0.239924 | 3.609989  | 0.751666  |
| H                                          | -0.649005 | -2.472319 | -0.169369 | C | 0.946146  | 4.330557  | 0.673472  |
| H                                          | -1.588745 | -4.138991 | -1.673762 | C | 1.492096  | 4.635216  | -0.563980 |
| H                                          | -0.489689 | -3.071496 | -2.561644 | C | 0.842874  | 4.222068  | -1.721672 |
| H                                          | 0.018563  | -4.708003 | -2.123925 | C | -0.339671 | 3.502712  | -1.638980 |
| H                                          | -1.172327 | -4.678796 | 0.757342  | O | -6.548983 | 0.061124  | 0.615379  |
| H                                          | 0.226963  | -4.011044 | 1.607953  | C | -7.714375 | -0.748975 | 0.675403  |
| H                                          | 0.451911  | -5.265394 | 0.386677  | H | -1.740191 | -0.861507 | 1.361830  |
| H                                          | -2.326748 | 3.773312  | -0.572425 | H | -1.032893 | 0.692033  | 1.839957  |
| H                                          | -1.783165 | 3.212272  | 1.000198  | H | 0.338800  | -1.941712 | 1.430967  |
| H                                          | -4.050745 | 2.974418  | 0.697395  | H | 0.520045  | 0.261351  | -1.760595 |
| H                                          | -6.300828 | 2.058105  | 1.076787  | H | 0.522413  | 1.617305  | 2.893529  |
| H                                          | -6.854988 | -0.249762 | 0.367550  | H | 1.977089  | 1.448210  | 1.908755  |
| H                                          | -2.879382 | -0.713282 | -1.151781 | H | 2.062718  | 1.267239  | 3.660754  |
| H                                          | 0.462914  | 3.572359  | 1.631512  | H | 3.279186  | -0.856093 | 2.067714  |
| H                                          | 2.779628  | 4.204929  | 1.081587  | H | 2.413483  | -2.272959 | 2.671075  |
| H                                          | 3.438269  | 4.576813  | -1.277189 | H | 2.964281  | -1.026819 | 3.793024  |
| H                                          | 1.758537  | 4.297655  | -3.078274 | H | -0.656651 | -0.397679 | 3.835166  |
| H                                          | -0.550882 | 3.650876  | -2.528586 | H | 0.142301  | -1.978911 | 3.815779  |
| H                                          | -4.821624 | -3.694703 | -1.509676 | H | 0.799225  | -0.660401 | 4.791364  |
| H                                          | -3.935329 | -2.360613 | -2.285095 | H | -1.692065 | 1.041033  | -1.914758 |
| H                                          | -3.485197 | -2.900083 | -0.641484 | H | 3.736132  | -4.119663 | -1.162760 |
| $\omega$ B97X energy = -1507.41290728 a.u. |           |           |           | H | 5.740801  | -2.711167 | -1.365850 |
| (5S,1'R)-9b, Conf. B                       |           |           |           | H | 5.576100  | -0.276364 | -1.072711 |
| C                                          | -0.908467 | -0.178316 | 1.194417  | H | 2.441151  | 1.520267  | -0.131798 |
| C                                          | 0.471134  | -0.858508 | 1.387045  | H | 4.304233  | 2.838838  | 0.693846  |
| N                                          | 1.138949  | -0.553753 | 0.081708  | H | 4.304631  | 1.293566  | 1.553355  |
| C                                          | 0.279841  | 0.021571  | -0.731649 | H | 5.468796  | 1.586012  | 0.257636  |
| N                                          | -0.889724 | 0.253981  | -0.206597 | H | 3.611139  | 2.957078  | -1.739708 |
| C                                          | 1.210372  | -0.450239 | 2.680389  | H | 2.956802  | 1.536055  | -2.562419 |
| C                                          | 1.451714  | 1.056125  | 2.780557  | H | 4.683317  | 1.627054  | -2.196904 |
| C                                          | 2.544903  | -1.195056 | 2.798844  | H | 0.321602  | -2.795305 | -0.409875 |
| C                                          | 0.313996  | -0.899380 | 3.843165  | H | 0.045650  | -4.599266 | -2.004446 |
| C                                          | -1.995663 | 0.954621  | -0.868940 | H | 0.894906  | -3.251557 | -2.776134 |
| C                                          | 2.382273  | -1.124743 | -0.383871 | H | 1.786431  | -4.695971 | -2.280675 |
| C                                          | 2.430466  | -2.502291 | -0.639406 | H | 0.392447  | -5.091550 | 0.459842  |
| C                                          | 3.662052  | -3.053922 | -0.977345 | H | 1.440606  | -4.063811 | 1.445904  |
| C                                          | 4.789806  | -2.261915 | -1.103973 | H | 2.144730  | -5.155402 | 0.251163  |
|                                            |           |           |           | H | -2.964717 | 2.851395  | -0.868170 |
|                                            |           |           |           | H | -2.488721 | 2.327227  | 0.737018  |

|   |           |           |           |
|---|-----------|-----------|-----------|
| H | -2.326783 | -1.435762 | -2.058880 |
| H | -4.297743 | -2.912544 | -2.008379 |
| H | -6.318893 | -2.274211 | -0.770801 |
| H | -4.438706 | 1.379623  | 0.416020  |
| H | -0.668311 | 3.388165  | 1.724241  |
| H | 1.440676  | 4.653882  | 1.582606  |
| H | 2.417944  | 5.195676  | -0.629022 |
| H | 1.260007  | 4.462433  | -2.693120 |
| H | -0.842001 | 3.195281  | -2.551520 |
| H | -8.426980 | -0.203861 | 1.289204  |
| H | -8.137910 | -0.906018 | -0.320205 |
| H | -7.500228 | -1.715591 | 1.139192  |

ωB97X energy = -1507.41261620 a.u.

(5S,1'R)-**9b**, Conf. C

|   |           |           |           |
|---|-----------|-----------|-----------|
| C | -0.801865 | 0.339449  | 1.483247  |
| C | 0.328115  | -0.718477 | 1.538452  |
| N | 0.891592  | -0.623924 | 0.154222  |
| C | 0.132176  | 0.161492  | -0.579304 |
| N | -0.849762 | 0.722459  | 0.068259  |
| C | 1.305040  | -0.549811 | 2.722674  |
| C | 1.987111  | 0.818752  | 2.746139  |
| C | 2.366948  | -1.655387 | 2.710927  |
| C | 0.464024  | -0.717888 | 3.996048  |
| C | -1.792502 | 1.700394  | -0.487131 |
| C | 1.844932  | -1.540294 | -0.429248 |
| C | 3.122772  | -1.076328 | -0.768685 |
| C | 4.040931  | -2.008963 | -1.242242 |
| C | 3.700949  | -3.342424 | -1.385555 |
| C | 2.411794  | -3.761089 | -1.106071 |
| C | 1.449848  | -2.867812 | -0.645586 |
| C | 0.020864  | -3.357081 | -0.462990 |
| C | -0.545076 | -3.875617 | -1.788442 |
| C | -0.088383 | -4.424475 | 0.627504  |
| C | 3.534294  | 0.385055  | -0.698401 |
| C | 4.762473  | 0.601403  | 0.187956  |
| C | 3.786742  | 0.933728  | -2.106193 |
| C | -1.455690 | 3.116873  | -0.005562 |
| C | -3.215518 | 1.239671  | -0.203462 |
| C | -4.086822 | 1.954912  | 0.613255  |
| C | -5.367345 | 1.470856  | 0.834121  |
| C | -5.800039 | 0.283746  | 0.260253  |
| C | -4.926409 | -0.431004 | -0.556032 |
| C | -3.640872 | 0.052876  | -0.782344 |
| C | -0.049704 | 3.528742  | -0.366200 |
| C | 0.304911  | 3.762745  | -1.694890 |
| C | 1.602961  | 4.119086  | -2.028790 |
| C | 2.569392  | 4.246004  | -1.037875 |
| C | 2.227907  | 4.017475  | 0.286620  |
| C | 0.924791  | 3.664443  | 0.616815  |
| O | -5.236261 | -1.598842 | -1.172546 |
| C | -6.541352 | -2.127673 | -0.982233 |
| H | -1.766101 | -0.059835 | 1.794620  |
| H | -0.573870 | 1.219018  | 2.087247  |
| H | -0.112064 | -1.713786 | 1.634091  |

|   |           |           |           |
|---|-----------|-----------|-----------|
| H | 0.299401  | 0.310021  | -1.639396 |
| H | 1.286838  | 1.625090  | 2.972326  |
| H | 2.477338  | 1.051601  | 1.799818  |
| H | 2.749427  | 0.829416  | 3.527841  |
| H | 3.083788  | -1.540105 | 1.897630  |
| H | 1.912187  | -2.645754 | 2.622489  |
| H | 2.923644  | -1.627941 | 3.650073  |
| H | -0.314973 | 0.043767  | 4.080316  |
| H | -0.012276 | -1.701442 | 4.028875  |
| H | 1.108038  | -0.627117 | 4.872800  |
| H | -1.638631 | 1.664446  | -1.568293 |
| H | 5.040815  | -1.682876 | -1.506035 |
| H | 4.436523  | -4.054182 | -1.742080 |
| H | 2.142340  | -4.798862 | -1.267538 |
| H | -0.608132 | -2.514182 | -0.171680 |
| H | -1.596172 | -4.144916 | -1.664031 |
| H | -0.476883 | -3.116909 | -2.570913 |
| H | -0.009601 | -4.764517 | -2.129421 |
| H | -1.130000 | -4.725192 | 0.757691  |
| H | 0.282768  | -4.062864 | 1.589556  |
| H | 0.487066  | -5.314704 | 0.362393  |
| H | 2.712004  | 0.962209  | -0.271046 |
| H | 4.964867  | 1.670746  | 0.286833  |
| H | 4.619222  | 0.190231  | 1.189541  |
| H | 5.650039  | 0.133068  | -0.243988 |
| H | 4.036784  | 1.995371  | -2.054706 |
| H | 2.906599  | 0.824414  | -2.744391 |
| H | 4.618113  | 0.411917  | -2.586744 |
| H | -2.177356 | 3.795882  | -0.465477 |
| H | -1.594673 | 3.191270  | 1.075335  |
| H | -3.783369 | 2.884537  | 1.076704  |
| H | -6.046955 | 2.027962  | 1.468551  |
| H | -6.804961 | -0.068240 | 0.450942  |
| H | -2.982408 | -0.522266 | -1.426053 |
| H | -0.444771 | 3.677174  | -2.475974 |
| H | 1.860436  | 4.302921  | -3.065726 |
| H | 3.583755  | 4.526332  | -1.298420 |
| H | 2.973366  | 4.118461  | 1.067617  |
| H | 0.661053  | 3.506570  | 1.657858  |
| H | -7.304019 | -1.437726 | -1.352844 |
| H | -6.578210 | -3.050168 | -1.556118 |
| H | -6.728093 | -2.348117 | 0.072085  |

ωB97X energy = -1507.41239874 a.u.

(5S,1'R)-**9b**, Conf. D

|   |           |           |           |
|---|-----------|-----------|-----------|
| C | -0.720165 | 0.313465  | 1.569909  |
| C | 0.452152  | -0.700922 | 1.587465  |
| N | 0.918814  | -0.640040 | 0.166400  |
| C | 0.102426  | 0.113962  | -0.537744 |
| N | -0.850875 | 0.671413  | 0.153447  |
| C | 1.500218  | -0.450490 | 2.694914  |
| C | 2.133108  | 0.938885  | 2.616676  |
| C | 2.600191  | -1.517290 | 2.651581  |
| C | 0.754126  | -0.594106 | 4.028942  |
| C | -1.851118 | 1.607025  | -0.378056 |

|   |           |           |           |
|---|-----------|-----------|-----------|
| C | 1.879771  | -1.526916 | -0.447746 |
| C | 3.098139  | -1.005323 | -0.903566 |
| C | 4.034159  | -1.903417 | -1.408098 |
| C | 3.768713  | -3.259856 | -1.466726 |
| C | 2.533127  | -3.740011 | -1.069597 |
| C | 1.553301  | -2.884024 | -0.576944 |
| C | 0.174954  | -3.448748 | -0.267674 |
| C | -0.445016 | -4.072643 | -1.521449 |
| C | 0.211614  | -4.459766 | 0.879812  |
| C | 3.424627  | 0.479030  | -0.923861 |
| C | 4.714069  | 0.799589  | -0.165657 |
| C | 3.509108  | 0.982944  | -2.368092 |
| C | -1.566757 | 3.039843  | 0.089190  |
| C | -3.245482 | 1.089137  | -0.065843 |
| C | -3.976317 | 1.520780  | 1.039554  |
| C | -5.227687 | 0.977875  | 1.283099  |
| C | -5.770537 | 0.010730  | 0.446822  |
| C | -5.039089 | -0.418805 | -0.656663 |
| C | -3.780242 | 0.124399  | -0.904916 |
| C | -0.191687 | 3.511630  | -0.317294 |
| C | 0.789322  | 3.748169  | 0.639490  |
| C | 2.067867  | 4.147023  | 0.267401  |
| C | 2.377554  | 4.320797  | -1.072949 |
| C | 1.402431  | 4.097635  | -2.038199 |
| C | 0.129544  | 3.695820  | -1.662453 |
| O | -5.465691 | -1.353077 | -1.542259 |
| C | -6.748116 | -1.929398 | -1.336667 |
| H | -1.651653 | -0.117778 | 1.933654  |
| H | -0.499547 | 1.211147  | 2.149442  |
| H | 0.057868  | -1.706375 | 1.750233  |
| H | 0.207678  | 0.244135  | -1.608208 |
| H | 1.415531  | 1.733762  | 2.827236  |
| H | 2.577179  | 1.134701  | 1.639923  |
| H | 2.925731  | 1.017299  | 3.363822  |
| H | 3.245252  | -1.416861 | 1.778229  |
| H | 2.178774  | -2.526092 | 2.647607  |
| H | 3.227171  | -1.422985 | 3.540713  |
| H | -0.039251 | 0.148892  | 4.141089  |
| H | 0.309850  | -1.588073 | 4.129595  |
| H | 1.454317  | -0.453781 | 4.854620  |
| H | -1.721097 | 1.574933  | -1.461531 |
| H | 4.988603  | -1.531680 | -1.763620 |
| H | 4.518452  | -3.943427 | -1.848080 |
| H | 2.317727  | -4.798435 | -1.164889 |
| H | -0.484579 | -2.630160 | 0.024426  |
| H | -1.464574 | -4.401619 | -1.309350 |
| H | -0.481159 | -3.353976 | -2.342782 |
| H | 0.124162  | -4.942781 | -1.856201 |
| H | -0.795657 | -4.821047 | 1.097064  |
| H | 0.620203  | -4.023415 | 1.794363  |
| H | 0.828380  | -5.323387 | 0.619649  |
| H | 2.613468  | 1.025828  | -0.439023 |
| H | 4.860830  | 1.881648  | -0.123105 |
| H | 4.687032  | 0.419901  | 0.858176  |
| H | 5.585106  | 0.365101  | -0.661649 |
| H | 3.703256  | 2.057450  | -2.379937 |

|   |           |           |           |
|---|-----------|-----------|-----------|
| H | 2.578188  | 0.801822  | -2.911221 |
| H | 4.316893  | 0.484884  | -2.910080 |
| H | -2.336670 | 3.678124  | -0.350920 |
| H | -1.674498 | 3.118826  | 1.172770  |
| H | -3.583203 | 2.274364  | 1.710552  |
| H | -5.798547 | 1.311856  | 2.141777  |
| H | -6.750982 | -0.392664 | 0.661454  |
| H | -3.231034 | -0.224607 | -1.773555 |
| H | 0.550562  | 3.630932  | 1.692004  |
| H | 2.819580  | 4.324743  | 1.028369  |
| H | 3.373267  | 4.633816  | -1.366484 |
| H | 1.633890  | 4.240020  | -3.087764 |
| H | -0.626462 | 3.532820  | -2.424921 |
| H | -7.532939 | -1.169650 | -1.378895 |
| H | -6.890255 | -2.642144 | -2.145035 |
| H | -6.796739 | -2.453188 | -0.378341 |

ωB97X energy = -1507.41224407 a.u.

(5*S*,1'*R*)-**9b**, Conf. E

|   |           |           |           |
|---|-----------|-----------|-----------|
| C | -1.013735 | -0.585791 | 1.025102  |
| C | 0.431603  | -1.087902 | 1.275506  |
| N | 1.144367  | -0.564661 | 0.067715  |
| C | 0.290847  | 0.044723  | -0.727024 |
| N | -0.930834 | 0.087831  | -0.276058 |
| C | 1.011894  | -0.707651 | 2.657013  |
| C | 0.114876  | -1.386343 | 3.702034  |
| C | 1.022560  | 0.801445  | 2.900502  |
| C | 2.429515  | -1.266542 | 2.821466  |
| C | -2.059764 | 0.765957  | -0.928466 |
| C | 2.477715  | -0.933509 | -0.348788 |
| C | 2.718737  | -2.263729 | -0.720344 |
| C | 4.031016  | -2.627975 | -1.004942 |
| C | 5.055186  | -1.698449 | -0.971089 |
| C | 4.776152  | -0.374615 | -0.683273 |
| C | 3.485077  | 0.040839  | -0.370608 |
| C | 3.237838  | 1.520353  | -0.124593 |
| C | 4.088563  | 2.069497  | 1.022131  |
| C | 3.490108  | 2.316438  | -1.408871 |
| C | 1.619821  | -3.303324 | -0.880203 |
| C | 1.583788  | -3.836000 | -2.315638 |
| C | 1.770575  | -4.452442 | 0.118799  |
| C | -2.333796 | 2.126128  | -0.274546 |
| C | -3.248075 | -0.181472 | -0.980243 |
| C | -3.245181 | -1.189704 | -1.933377 |
| C | -4.299229 | -2.094571 | -1.986010 |
| C | -5.352513 | -1.997248 | -1.097754 |
| C | -5.360317 | -0.983034 | -0.141090 |
| C | -4.306363 | -0.075429 | -0.079807 |
| C | -1.180507 | 3.089477  | -0.418799 |
| C | -0.839328 | 3.600742  | -1.671185 |
| C | 0.215224  | 4.490368  | -1.811086 |
| C | 0.949651  | 4.882110  | -0.698056 |
| C | 0.622332  | 4.377983  | 0.551630  |
| C | -0.437938 | 3.489517  | 0.687794  |
| O | -6.433031 | -0.957221 | 0.688308  |

|   |           |           |           |
|---|-----------|-----------|-----------|
| C | -6.502154 | 0.070382  | 1.666280  |
| H | -1.735236 | -1.400324 | 0.971445  |
| H | -1.346578 | 0.122101  | 1.784273  |
| H | 0.453210  | -2.177102 | 1.214431  |
| H | 0.579338  | 0.460922  | -1.685142 |
| H | 0.099272  | -2.471096 | 3.565161  |
| H | -0.914473 | -1.021883 | 3.665996  |
| H | 0.500671  | -1.179750 | 4.702131  |
| H | 0.014932  | 1.217405  | 2.965004  |
| H | 1.563000  | 1.339839  | 2.120151  |
| H | 1.516097  | 1.012198  | 3.851563  |
| H | 2.465858  | -2.336859 | 2.601100  |
| H | 3.153954  | -0.765188 | 2.179659  |
| H | 2.751963  | -1.129435 | 3.855795  |
| H | -1.735450 | 0.940870  | -1.956446 |
| H | 4.251294  | -3.654546 | -1.275737 |
| H | 6.071426  | -2.001982 | -1.194583 |
| H | 5.578089  | 0.354702  | -0.701530 |
| H | 2.190002  | 1.666912  | 0.144312  |
| H | 3.829102  | 3.114492  | 1.208754  |
| H | 3.933096  | 1.511613  | 1.948091  |
| H | 5.153295  | 2.029774  | 0.780725  |
| H | 3.274619  | 3.373923  | -1.243722 |
| H | 2.857788  | 1.965591  | -2.228187 |
| H | 4.531821  | 2.226736  | -1.726616 |
| H | 0.654653  | -2.824482 | -0.706983 |
| H | 0.744309  | -4.523905 | -2.436930 |
| H | 1.468427  | -3.024180 | -3.036636 |
| H | 2.498731  | -4.379746 | -2.561417 |
| H | 0.954288  | -5.167950 | -0.000072 |
| H | 1.763429  | -4.099133 | 1.152797  |
| H | 2.710413  | -4.986075 | -0.041945 |
| H | -3.225870 | 2.538972  | -0.751857 |
| H | -2.571639 | 1.998071  | 0.783853  |
| H | -2.424141 | -1.268574 | -2.638109 |
| H | -4.299818 | -2.880028 | -2.732736 |
| H | -6.182096 | -2.693583 | -1.129209 |
| H | -4.310414 | 0.710350  | 0.662919  |
| H | -1.415265 | 3.313416  | -2.546049 |
| H | 0.460308  | 4.885548  | -2.790383 |
| H | 1.770449  | 5.582110  | -0.806063 |
| H | 1.186610  | 4.680581  | 1.426826  |
| H | -0.698293 | 3.116234  | 1.673074  |
| H | -7.437254 | -0.085069 | 2.198312  |
| H | -5.668871 | 0.003501  | 2.371140  |
| H | -6.510619 | 1.059243  | 1.199969  |

ωB97X energy = -1507.41180990 a.u.

(5*S*,1'*R*)-**9b**, Conf. F

|   |           |           |           |
|---|-----------|-----------|-----------|
| C | 0.518514  | 0.398320  | 2.053500  |
| C | -0.543106 | -0.713078 | 1.857467  |
| N | -0.839149 | -0.582813 | 0.396078  |
| C | -0.105530 | 0.374435  | -0.128773 |
| N | 0.692968  | 0.966080  | 0.712384  |
| C | -0.105760 | -2.106772 | 2.363267  |

|   |           |           |           |
|---|-----------|-----------|-----------|
| C | -1.228350 | -3.128292 | 2.155316  |
| C | 0.125005  | -1.960988 | 3.874346  |
| C | 1.177168  | -2.608333 | 1.699041  |
| C | 1.757993  | 1.929420  | 0.420535  |
| C | -1.955830 | -1.168401 | -0.309481 |
| C | -1.712921 | -2.125281 | -1.305297 |
| C | -2.815331 | -2.703651 | -1.926117 |
| C | -4.105284 | -2.345209 | -1.575937 |
| C | -4.315949 | -1.360962 | -0.626735 |
| C | -3.248894 | -0.732826 | 0.008201  |
| C | -3.533343 | 0.417512  | 0.961050  |
| C | -4.270133 | 1.550224  | 0.240540  |
| C | -4.313296 | -0.045083 | 2.193408  |
| C | -0.319286 | -2.516087 | -1.769236 |
| C | -0.086372 | -4.026701 | -1.710020 |
| C | -0.052676 | -1.981594 | -3.179949 |
| C | 1.480712  | 2.731048  | -0.855685 |
| C | 3.104985  | 1.228446  | 0.377878  |
| C | 4.141454  | 1.679516  | 1.175529  |
| C | 5.382588  | 1.047831  | 1.113038  |
| C | 5.582064  | -0.026146 | 0.271972  |
| C | 4.533902  | -0.486284 | -0.529773 |
| C | 3.297937  | 0.144179  | -0.480288 |
| C | 0.177190  | 3.497074  | -0.839975 |
| C | -0.763780 | 3.317832  | -1.849763 |
| C | -1.962429 | 4.021127  | -1.839913 |
| C | -2.234978 | 4.915262  | -0.815528 |
| C | -1.299267 | 5.107681  | 0.193683  |
| C | -0.103436 | 4.405741  | 0.179475  |
| O | 4.815842  | -1.551039 | -1.320847 |
| C | 3.777171  | -2.076587 | -2.132309 |
| H | 0.187379  | 1.180414  | 2.736654  |
| H | 1.474176  | 0.009063  | 2.404936  |
| H | -1.454213 | -0.452271 | 2.397976  |
| H | -0.183442 | 0.646443  | -1.173138 |
| H | -1.414023 | -3.334544 | 1.100978  |
| H | -2.165062 | -2.785045 | 2.603664  |
| H | -0.955404 | -4.070677 | 2.634886  |
| H | -0.773583 | -1.593178 | 4.376949  |
| H | 0.948885  | -1.283086 | 4.108108  |
| H | 0.372065  | -2.935120 | 4.300271  |
| H | 1.035599  | -2.798192 | 0.634702  |
| H | 2.012777  | -1.912894 | 1.811315  |
| H | 1.477433  | -3.551435 | 2.160214  |
| H | 1.760284  | 2.616860  | 1.269185  |
| H | -2.660578 | -3.448176 | -2.698749 |
| H | -4.950285 | -2.819237 | -2.061701 |
| H | -5.329724 | -1.058605 | -0.389295 |
| H | -2.585404 | 0.838729  | 1.299834  |
| H | -4.410007 | 2.394116  | 0.920013  |
| H | -3.703113 | 1.902208  | -0.624686 |
| H | -5.256294 | 1.230179  | -0.103633 |
| H | -4.459677 | 0.788102  | 2.883828  |
| H | -3.791397 | -0.842792 | 2.728355  |
| H | -5.298611 | -0.424757 | 1.912176  |
| H | 0.406808  | -2.048806 | -1.102488 |

|   |           |           |           |
|---|-----------|-----------|-----------|
| H | 0.949956  | -4.255355 | -1.970382 |
| H | -0.280349 | -4.427198 | -0.712515 |
| H | -0.728267 | -4.557154 | -2.416564 |
| H | 0.968112  | -2.219424 | -3.489404 |
| H | -0.180732 | -0.897496 | -3.234522 |
| H | -0.736272 | -2.433095 | -3.903119 |
| H | 2.319385  | 3.423051  | -0.962602 |
| H | 1.524020  | 2.074705  | -1.729464 |
| H | 3.987820  | 2.517262  | 1.846625  |
| H | 6.196968  | 1.397552  | 1.736771  |
| H | 6.539298  | -0.531044 | 0.219540  |
| H | 2.484507  | -0.203622 | -1.106765 |
| H | -0.555863 | 2.628796  | -2.663571 |
| H | -2.682836 | 3.867913  | -2.635459 |
| H | -3.170079 | 5.463211  | -0.803984 |
| H | -1.499764 | 5.812459  | 0.992582  |
| H | 0.622335  | 4.578023  | 0.968114  |
| H | 3.420946  | -1.333658 | -2.851767 |
| H | 4.208550  | -2.918937 | -2.666961 |
| H | 2.939811  | -2.428088 | -1.520153 |

ωB97X energy = -1507.41143628 a.u.

(5*S*,1'*R*)-**9b**, Conf. G

|   |           |           |           |
|---|-----------|-----------|-----------|
| C | -0.749788 | 1.024232  | 1.515353  |
| C | -1.070247 | -0.491268 | 1.428550  |
| N | -0.417965 | -0.858189 | 0.131359  |
| C | 0.133189  | 0.203846  | -0.411783 |
| N | 0.023621  | 1.291941  | 0.295406  |
| C | -0.663157 | -1.302590 | 2.680479  |
| C | 0.821436  | -1.173126 | 3.024524  |
| C | -1.023453 | -2.781580 | 2.505829  |
| C | -1.502799 | -0.745755 | 3.839156  |
| C | 0.587533  | 2.606443  | -0.059672 |
| C | -0.567219 | -2.099520 | -0.591080 |
| C | -1.823039 | -2.412936 | -1.126814 |
| C | -1.966897 | -3.645803 | -1.755509 |
| C | -0.893514 | -4.508454 | -1.891588 |
| C | 0.354904  | -4.140581 | -1.420609 |
| C | 0.549209  | -2.930247 | -0.762564 |
| C | 1.950355  | -2.554328 | -0.308257 |
| C | 2.572366  | -3.618586 | 0.597592  |
| C | 2.856447  | -2.268704 | -1.509846 |
| C | -3.001878 | -1.452540 | -1.106412 |
| C | -3.438329 | -1.101764 | -2.531566 |
| C | -4.176903 | -2.000184 | -0.294860 |
| C | -0.342134 | 3.349324  | -1.031084 |
| C | 2.022046  | 2.436939  | -0.548978 |
| C | 2.468845  | 2.981697  | -1.739633 |
| C | 3.793413  | 2.785223  | -2.135064 |
| C | 4.660710  | 2.047303  | -1.361485 |
| C | 4.212956  | 1.494540  | -0.157739 |
| C | 2.903716  | 1.698230  | 0.249812  |
| C | -1.770191 | 3.381247  | -0.548440 |
| C | -2.165168 | 4.265816  | 0.452596  |
| C | -3.458940 | 4.235357  | 0.954042  |

|   |           |           |           |
|---|-----------|-----------|-----------|
| C | -4.377700 | 3.317860  | 0.459613  |
| C | -3.998833 | 2.442961  | -0.549305 |
| C | -2.704418 | 2.479632  | -1.051765 |
| O | 5.127068  | 0.777969  | 0.542182  |
| C | 4.710051  | 0.157668  | 1.748849  |
| H | -1.650076 | 1.638604  | 1.525858  |
| H | -0.144903 | 1.277319  | 2.386202  |
| H | -2.145003 | -0.631659 | 1.300381  |
| H | 0.635262  | 0.169787  | -1.371333 |
| H | 1.112642  | -0.144133 | 3.247902  |
| H | 1.460760  | -1.543948 | 2.222570  |
| H | 1.038807  | -1.766524 | 3.914992  |
| H | -0.405805 | -3.276865 | 1.756231  |
| H | -2.070926 | -2.905295 | 2.216980  |
| H | -0.877105 | -3.302992 | 3.454157  |
| H | -1.292341 | 0.307751  | 4.037483  |
| H | -2.572198 | -0.848573 | 3.636415  |
| H | -1.279206 | -1.301819 | 4.751509  |
| H | 0.611962  | 3.157702  | 0.884312  |
| H | -2.930822 | -3.924750 | -2.166490 |
| H | -1.025220 | -5.462790 | -2.388147 |
| H | 1.197158  | -4.807149 | -1.567727 |
| H | 1.886822  | -1.630946 | 0.268573  |
| H | 3.538242  | -3.271584 | 0.972922  |
| H | 1.935504  | -3.841380 | 1.456699  |
| H | 2.744814  | -4.551350 | 0.056174  |
| H | 3.843279  | -1.946510 | -1.167862 |
| H | 2.447431  | -1.482911 | -2.149837 |
| H | 2.986310  | -3.164088 | -2.122714 |
| H | -2.684101 | -0.516084 | -0.644961 |
| H | -4.229092 | -0.347703 | -2.506614 |
| H | -2.604399 | -0.704196 | -3.114347 |
| H | -3.830573 | -1.976399 | -3.055201 |
| H | -4.987894 | -1.268989 | -0.266611 |
| H | -3.889420 | -2.227299 | 0.734783  |
| H | -4.567945 | -2.917661 | -0.741401 |
| H | 0.040353  | 4.365227  | -1.149206 |
| H | -0.298381 | 2.866929  | -2.010517 |
| H | 1.810257  | 3.559158  | -2.374508 |
| H | 4.141184  | 3.213904  | -3.067680 |
| H | 5.687612  | 1.880979  | -1.664365 |
| H | 2.552953  | 1.282648  | 1.186383  |
| H | -1.451835 | 4.983550  | 0.846449  |
| H | -3.751239 | 4.930141  | 1.733081  |
| H | -5.386634 | 3.290651  | 0.854527  |
| H | -4.714145 | 1.731563  | -0.948442 |
| H | -2.416316 | 1.797409  | -1.847094 |
| H | 3.904539  | -0.561009 | 1.564882  |
| H | 5.579784  | -0.368076 | 2.134202  |
| H | 4.378352  | 0.897211  | 2.482529  |

ωB97X energy = -1507.41082368 a.u.

(5*S*,1'*R*)-**9b**, Conf. H

|   |          |           |           |
|---|----------|-----------|-----------|
| C | 0.168973 | -0.769391 | -1.597797 |
| C | 1.663583 | -1.022714 | -1.282774 |



|   |           |           |           |                                            |           |           |           |
|---|-----------|-----------|-----------|--------------------------------------------|-----------|-----------|-----------|
| N | 1.920489  | 0.011985  | -0.232807 | H                                          | 1.510160  | 0.322247  | 4.345996  |
| C | 0.805831  | 0.650906  | 0.055465  | H                                          | 1.763949  | 1.592745  | 3.140795  |
| N | -0.230090 | 0.258890  | -0.629806 | H                                          | 3.094493  | 1.089625  | 4.184751  |
| C | 1.996344  | -2.486363 | -0.909462 | H                                          | 2.595362  | 1.253303  | -2.214307 |
| C | 3.496506  | -2.643776 | -0.641942 | H                                          | 3.398923  | 3.280076  | -3.271121 |
| C | 1.646824  | -3.337715 | -2.138607 | H                                          | 3.200750  | 3.553940  | -1.533986 |
| C | 1.199658  | -2.982762 | 0.297619  | H                                          | 4.815409  | 3.333270  | -2.220063 |
| C | -1.625786 | 0.695133  | -0.520250 | H                                          | 4.109533  | 1.008017  | -4.141107 |
| C | 3.214866  | 0.451925  | 0.234417  | H                                          | 4.356212  | -0.346647 | -3.030737 |
| C | 4.066778  | 1.100569  | -0.670443 | H                                          | 5.516024  | 0.981297  | -3.072397 |
| C | 5.342015  | 1.440186  | -0.229321 | H                                          | -1.482347 | 1.694315  | 1.394070  |
| C | 5.737749  | 1.194288  | 1.073216  | H                                          | -1.071331 | 2.708178  | 0.003429  |
| C | 4.851137  | 0.621995  | 1.967779  | H                                          | -1.357058 | -0.824807 | 1.754891  |
| C | 3.573482  | 0.237383  | 1.573086  | H                                          | -2.820782 | -2.656330 | 2.502987  |
| C | 2.631269  | -0.343358 | 2.614622  | H                                          | -4.764304 | -3.342892 | 1.176370  |
| C | 3.229583  | -1.559094 | 3.324962  | H                                          | -3.814145 | -0.347839 | -1.741149 |
| C | 2.225168  | 0.730425  | 3.628464  | H                                          | -2.902708 | 3.503110  | -1.532204 |
| C | 3.651186  | 1.493199  | -2.079754 | H                                          | -5.220910 | 4.335655  | -1.630393 |
| C | 3.775423  | 3.005794  | -2.283387 | H                                          | -6.813683 | 3.794582  | 0.187677  |
| C | 4.453323  | 0.736373  | -3.140860 | H                                          | -6.065871 | 2.416582  | 2.105133  |
| C | -1.759895 | 1.940097  | 0.365568  | H                                          | -3.747494 | 1.577029  | 2.196393  |
| C | -2.491335 | -0.459318 | -0.048892 | H                                          | -7.084322 | -3.293227 | -1.577561 |
| C | -2.210999 | -1.115019 | 1.150749  | H                                          | -5.796584 | -4.177340 | -0.724819 |
| C | -3.033011 | -2.143552 | 1.571924  | H                                          | -6.813135 | -3.002648 | 0.156793  |
| C | -4.138153 | -2.535575 | 0.821281  | $\omega$ B97X energy = -1507.41020066 a.u. |           |           |           |
| C | -4.412972 | -1.880827 | -0.373261 | (5S,1'R)- <b>9b</b> , Conf. I              |           |           |           |
| C | -3.581680 | -0.844208 | -0.804872 | C                                          | 0.229061  | -0.282843 | 2.017860  |
| C | -3.169464 | 2.478780  | 0.336939  | C                                          | 1.682813  | 0.117073  | 1.664112  |
| C | -3.598190 | 3.257239  | -0.735237 | N                                          | 1.760575  | -0.303736 | 0.229949  |
| C | -4.902337 | 3.728131  | -0.790917 | C                                          | 0.594752  | -0.764450 | -0.171165 |
| C | -5.795149 | 3.425869  | 0.229050  | N                                          | -0.328683 | -0.763100 | 0.747968  |
| C | -5.375319 | 2.654095  | 1.303860  | C                                          | 2.029387  | 1.591409  | 1.978570  |
| C | -4.069948 | 2.183544  | 1.355844  | C                                          | 3.486805  | 1.892713  | 1.614790  |
| O | -5.455348 | -2.176228 | -1.188195 | C                                          | 1.882738  | 1.754144  | 3.498551  |
| C | -6.329754 | -3.225692 | -0.798023 | C                                          | 1.105332  | 2.582647  | 1.269869  |
| H | 0.008973  | -0.391423 | -2.608122 | C                                          | -1.760234 | -1.048705 | 0.609400  |
| H | -0.448156 | -1.655548 | -1.455904 | C                                          | 2.961067  | -0.418423 | -0.565005 |
| H | 2.272021  | -0.768954 | -2.151107 | C                                          | 3.915418  | -1.377641 | -0.199844 |
| H | 0.772715  | 1.442658  | 0.792963  | C                                          | 5.104376  | -1.414091 | -0.921705 |
| H | 3.820644  | -2.106921 | 0.249827  | C                                          | 5.316204  | -0.568834 | -1.995994 |
| H | 4.090382  | -2.284917 | -1.487339 | C                                          | 4.326502  | 0.316669  | -2.383412 |
| H | 3.729627  | -3.700758 | -0.496271 | C                                          | 3.129333  | 0.414541  | -1.680979 |
| H | 2.192711  | -2.998071 | -3.022990 | C                                          | 2.066330  | 1.377707  | -2.184288 |
| H | 0.579323  | -3.322580 | -2.369024 | C                                          | 2.591950  | 2.809323  | -2.306332 |
| H | 1.924755  | -4.376546 | -1.951406 | C                                          | 1.493758  | 0.896929  | -3.521185 |
| H | 1.465292  | -2.446075 | 1.208998  | C                                          | 3.694384  | -2.404437 | 0.899851  |
| H | 0.119729  | -2.893622 | 0.154442  | C                                          | 3.788007  | -3.827034 | 0.341065  |
| H | 1.417352  | -4.039380 | 0.466870  | C                                          | 4.671946  | -2.212678 | 2.061370  |
| H | -1.929371 | 0.962693  | -1.536258 | C                                          | -2.062084 | -1.813403 | -0.685567 |
| H | 6.029602  | 1.926136  | -0.912467 | C                                          | -2.556826 | 0.238653  | 0.737093  |
| H | 6.734003  | 1.470406  | 1.398901  | C                                          | -3.571203 | 0.340132  | 1.684575  |
| H | 5.157597  | 0.468877  | 2.996287  | C                                          | -4.305214 | 1.511775  | 1.776038  |
| H | 1.721054  | -0.675504 | 2.114771  | C                                          | -4.041283 | 2.591646  | 0.942881  |
| H | 2.494398  | -1.990433 | 4.007811  | C                                          | -3.022954 | 2.487749  | -0.001292 |
| H | 3.529750  | -2.333825 | 2.615944  |                                            |           |           |           |
| H | 4.107194  | -1.284140 | 3.914214  |                                            |           |           |           |

|   |           |           |           |
|---|-----------|-----------|-----------|
| C | -2.287132 | 1.308703  | -0.099768 |
| C | -3.508586 | -2.241091 | -0.741040 |
| C | -3.945278 | -3.336316 | 0.000267  |
| C | -5.279564 | -3.717019 | -0.019789 |
| C | -6.194917 | -3.005592 | -0.784762 |
| C | -5.767872 | -1.915052 | -1.529718 |
| C | -4.432085 | -1.536044 | -1.506425 |
| O | -2.672896 | 3.474852  | -0.862912 |
| C | -3.393085 | 4.698401  | -0.803493 |
| H | 0.179879  | -1.082872 | 2.756903  |
| H | -0.363867 | 0.558483  | 2.374514  |
| H | 2.383261  | -0.501213 | 2.226554  |
| H | 0.435534  | -1.124133 | -1.179494 |
| H | 3.662760  | 1.867830  | 0.539277  |
| H | 4.169573  | 1.180242  | 2.086063  |
| H | 3.749822  | 2.890979  | 1.971185  |
| H | 2.537413  | 1.062508  | 4.035679  |
| H | 0.858570  | 1.590654  | 3.841139  |
| H | 2.163208  | 2.770069  | 3.782700  |
| H | 1.214562  | 2.536993  | 0.185766  |
| H | 0.050959  | 2.424180  | 1.510662  |
| H | 1.358442  | 3.598794  | 1.579621  |
| H | -2.012497 | -1.694967 | 1.454168  |
| H | 5.869103  | -2.133185 | -0.650475 |
| H | 6.248126  | -0.615986 | -2.547400 |
| H | 4.486824  | 0.948071  | -3.249999 |
| H | 1.243961  | 1.394498  | -1.468365 |
| H | 1.779535  | 3.481319  | -2.591382 |
| H | 3.013408  | 3.167855  | -1.364583 |
| H | 3.367610  | 2.884058  | -3.071495 |
| H | 0.701284  | 1.570063  | -3.855286 |
| H | 1.075353  | -0.109654 | -3.444122 |
| H | 2.267610  | 0.877479  | -4.292358 |
| H | 2.680213  | -2.293014 | 1.286522  |
| H | 3.553653  | -4.551371 | 1.124003  |
| H | 3.086151  | -3.974593 | -0.482290 |
| H | 4.793119  | -4.046040 | -0.026178 |
| H | 4.467968  | -2.938930 | 2.850932  |
| H | 4.600304  | -1.211630 | 2.494005  |
| H | 5.703241  | -2.357958 | 1.730811  |
| H | -1.839282 | -1.185204 | -1.552230 |
| H | -1.416926 | -2.694954 | -0.732602 |
| H | -3.785425 | -0.493167 | 2.344692  |
| H | -5.095996 | 1.595115  | 2.512564  |
| H | -4.624933 | 3.497230  | 1.039794  |
| H | -1.502658 | 1.262403  | -0.849317 |
| H | -3.234139 | -3.901603 | 0.595279  |
| H | -5.604475 | -4.573756 | 0.559619  |
| H | -7.237216 | -3.302797 | -0.802731 |
| H | -6.475269 | -1.356588 | -2.132187 |
| H | -4.103379 | -0.680830 | -2.088536 |
| H | -4.454293 | 4.541814  | -1.013725 |
| H | -3.279154 | 5.175735  | 0.173335  |
| H | -2.963110 | 5.337723  | -1.570336 |

ωB97X energy = -1507.41018148 a.u.

(5*S*,1'*R*)-**9b**, Conf. J

|   |           |           |           |
|---|-----------|-----------|-----------|
| C | -0.598435 | 1.280437  | 1.599809  |
| C | -1.688202 | 0.224271  | 1.282249  |
| N | -1.022150 | -0.573647 | 0.204556  |
| C | 0.171865  | -0.083777 | -0.047075 |
| N | 0.504717  | 0.934287  | 0.693688  |
| C | -2.203621 | -0.551103 | 2.516694  |
| C | -3.292303 | -1.549021 | 2.108369  |
| C | -2.844864 | 0.494063  | 3.440903  |
| C | -1.092131 | -1.281629 | 3.270225  |
| C | 1.785601  | 1.661572  | 0.636441  |
| C | -1.650599 | -1.549487 | -0.654042 |
| C | -2.629309 | -1.111310 | -1.555964 |
| C | -3.279406 | -2.074570 | -2.320945 |
| C | -2.935420 | -3.411803 | -2.230284 |
| C | -1.912148 | -3.807644 | -1.386944 |
| C | -1.245385 | -2.889424 | -0.581564 |
| C | -0.094892 | -3.370629 | 0.287364  |
| C | -0.509922 | -4.512819 | 1.216250  |
| C | 1.099950  | -3.781743 | -0.578420 |
| C | -2.962611 | 0.355287  | -1.781663 |
| C | -2.657486 | 0.760939  | -3.226370 |
| C | -4.412616 | 0.678250  | -1.417492 |
| C | 1.763587  | 2.713630  | -0.482237 |
| C | 2.938344  | 0.668163  | 0.561116  |
| C | 3.051027  | -0.309676 | 1.556313  |
| C | 4.077329  | -1.230946 | 1.501424  |
| C | 5.015839  | -1.204353 | 0.471934  |
| C | 4.909699  | -0.228531 | -0.508397 |
| C | 3.867799  | 0.703837  | -0.460459 |
| C | 0.549371  | 3.604988  | -0.418434 |
| C | -0.529046 | 3.385012  | -1.270915 |
| C | -1.684507 | 4.149118  | -1.167782 |
| C | -1.770995 | 5.151801  | -0.212032 |
| C | -0.692856 | 5.392039  | 0.631057  |
| C | 0.458437  | 4.623973  | 0.527452  |
| O | 5.760189  | -0.095474 | -1.555978 |
| C | 6.823670  | -1.030132 | -1.672875 |
| H | -0.935777 | 2.297640  | 1.403167  |
| H | -0.244948 | 1.223348  | 2.629185  |
| H | -2.554754 | 0.714380  | 0.834770  |
| H | 0.818801  | -0.496713 | -0.812416 |
| H | -2.900762 | -2.373810 | 1.512458  |
| H | -4.084114 | -1.061010 | 1.532988  |
| H | -3.747818 | -1.974928 | 3.004997  |
| H | -3.651909 | 1.028448  | 2.932309  |
| H | -2.123273 | 1.229834  | 3.803364  |
| H | -3.270587 | -0.004379 | 4.313719  |
| H | -0.610951 | -2.040124 | 2.652478  |
| H | -0.320367 | -0.603238 | 3.640712  |
| H | -1.517852 | -1.788381 | 4.138768  |
| H | 1.849893  | 2.179517  | 1.597008  |
| H | -4.052422 | -1.768914 | -3.017315 |
| H | -3.451504 | -4.146144 | -2.837907 |
| H | -1.624490 | -4.852418 | -1.352724 |

|   |           |           |           |
|---|-----------|-----------|-----------|
| H | 0.236303  | -2.542720 | 0.915147  |
| H | 0.317833  | -4.774612 | 1.878958  |
| H | -1.366025 | -4.237628 | 1.836596  |
| H | -0.778082 | -5.408568 | 0.651753  |
| H | 1.936509  | -4.086151 | 0.054716  |
| H | 1.437864  | -2.960682 | -1.215873 |
| H | 0.842274  | -4.622700 | -1.227100 |
| H | -2.315285 | 0.966036  | -1.150511 |
| H | -2.837560 | 1.830371  | -3.362275 |
| H | -1.615967 | 0.554667  | -3.483056 |
| H | -3.293088 | 0.224939  | -3.934721 |
| H | -4.608374 | 1.743417  | -1.559849 |
| H | -4.633984 | 0.428313  | -0.376873 |
| H | -5.108773 | 0.121462  | -2.049302 |
| H | 2.676215  | 3.307611  | -0.397507 |
| H | 1.790001  | 2.210605  | -1.451842 |
| H | 2.332522  | -0.347854 | 2.368410  |
| H | 4.162304  | -1.988166 | 2.272280  |
| H | 5.809713  | -1.938730 | 0.453595  |
| H | 3.825924  | 1.444409  | -1.248761 |
| H | -0.463925 | 2.609060  | -2.028882 |
| H | -2.516796 | 3.963604  | -1.838506 |
| H | -2.671407 | 5.749293  | -0.129057 |
| H | -0.748871 | 6.180607  | 1.372721  |
| H | 1.295044  | 4.816603  | 1.192476  |
| H | 7.492702  | -0.977587 | -0.809885 |
| H | 6.441871  | -2.049017 | -1.779346 |
| H | 7.369820  | -0.753081 | -2.570999 |

ωB97X energy = -1507.41014515 a.u.

(5*S*,1'*R*)-**9b**, Conf. K

|   |           |           |           |
|---|-----------|-----------|-----------|
| C | 0.941760  | 1.015541  | -1.509412 |
| C | 1.203929  | -0.512423 | -1.428509 |
| N | 0.494653  | -0.866484 | -0.158054 |
| C | -0.063879 | 0.203177  | 0.359712  |
| N | 0.101286  | 1.291404  | -0.336436 |
| C | 0.805102  | -1.296526 | -2.700856 |
| C | -0.658050 | -1.092704 | -3.095856 |
| C | 1.087173  | -2.792197 | -2.526113 |
| C | 1.711620  | -0.772902 | -3.824084 |
| C | -0.474841 | 2.607112  | -0.008041 |
| C | 0.553751  | -2.119307 | 0.555613  |
| C | 1.771418  | -2.504167 | 1.131000  |
| C | 1.825468  | -3.745975 | 1.756424  |
| C | 0.701827  | -4.548270 | 1.850311  |
| C | -0.507432 | -4.109696 | 1.339398  |
| C | -0.612681 | -2.887690 | 0.682642  |
| C | -1.976038 | -2.435840 | 0.182527  |
| C | -2.618025 | -3.461595 | -0.753308 |
| C | -2.908736 | -2.114020 | 1.354516  |
| C | 3.001877  | -1.610283 | 1.157200  |
| C | 3.403102  | -1.285059 | 2.598715  |
| C | 4.173682  | -2.223219 | 0.388651  |
| C | 0.405976  | 3.343957  | 1.012107  |
| C | -1.931338 | 2.434599  | 0.413175  |

|   |           |           |           |
|---|-----------|-----------|-----------|
| C | -2.435742 | 2.976298  | 1.592386  |
| C | -3.763568 | 2.761101  | 1.932474  |
| C | -4.603823 | 2.006457  | 1.127408  |
| C | -4.099898 | 1.467319  | -0.054163 |
| C | -2.773385 | 1.694138  | -0.406937 |
| C | 1.854156  | 3.385724  | 0.594983  |
| C | 2.767616  | 2.478396  | 1.125385  |
| C | 4.083527  | 2.452828  | 0.681442  |
| C | 4.504783  | 3.344952  | -0.295281 |
| C | 3.605990  | 4.267257  | -0.816644 |
| C | 2.290652  | 4.286345  | -0.373954 |
| O | -4.819112 | 0.708107  | -0.918066 |
| C | -6.178957 | 0.443523  | -0.600649 |
| H | 1.862083  | 1.596538  | -1.450667 |
| H | 0.404166  | 1.304024  | -2.412429 |
| H | 2.267952  | -0.693768 | -1.267730 |
| H | -0.616697 | 0.175433  | 1.290918  |
| H | -0.890233 | -0.048460 | -3.316834 |
| H | -1.344676 | -1.439986 | -2.323006 |
| H | -0.870833 | -1.664896 | -4.001248 |
| H | 0.419916  | -3.261470 | -1.802753 |
| H | 2.116565  | -2.968787 | -2.202180 |
| H | 0.948978  | -3.299528 | -3.483279 |
| H | 1.556689  | 0.290084  | -4.022824 |
| H | 2.767094  | -0.925728 | -3.583442 |
| H | 1.496397  | -1.313199 | -4.747872 |
| H | -0.451462 | 3.160971  | -0.950227 |
| H | 2.757726  | -4.080406 | 2.197817  |
| H | 0.763555  | -5.510543 | 2.345205  |
| H | -1.389804 | -4.729417 | 1.452895  |
| H | -1.851767 | -1.513059 | -0.384920 |
| H | -3.550567 | -3.062459 | -1.158683 |
| H | -1.962625 | -3.709529 | -1.591406 |
| H | -2.854530 | -4.388449 | -0.225952 |
| H | -3.862007 | -1.732461 | 0.979501  |
| H | -2.481103 | -1.359191 | 2.019438  |
| H | -3.111702 | -3.006886 | 1.951084  |
| H | 2.755568  | -0.656366 | 0.688018  |
| H | 4.238355  | -0.580332 | 2.603835  |
| H | 2.572340  | -0.834900 | 3.146916  |
| H | 3.719309  | -2.181131 | 3.137575  |
| H | 5.025902  | -1.540028 | 0.394706  |
| H | 3.913188  | -2.430603 | -0.652313 |
| H | 4.493493  | -3.162716 | 0.845716  |
| H | 0.014849  | 4.357518  | 1.122676  |
| H | 0.319276  | 2.851723  | 1.983945  |
| H | -1.809882 | 3.561859  | 2.252497  |
| H | -4.153809 | 3.183533  | 2.851151  |
| H | -5.631546 | 1.846979  | 1.424689  |
| H | -2.417836 | 1.265235  | -1.338289 |
| H | 2.445738  | 1.780250  | 1.893481  |
| H | 4.780600  | 1.735281  | 1.100960  |
| H | 5.530763  | 3.326990  | -0.644245 |
| H | 3.930556  | 4.974621  | -1.571223 |
| H | 1.593447  | 5.008093  | -0.788893 |
| H | -6.561592 | -0.172663 | -1.410237 |

|   |           |           |           |
|---|-----------|-----------|-----------|
| H | -6.265282 | -0.101871 | 0.343159  |
| H | -6.757337 | 1.369286  | -0.543158 |

ωB97X energy = -1507.41008966 a.u.

(5*S*,1'*R*)-**9b**, Conf. L

|   |           |           |           |
|---|-----------|-----------|-----------|
| C | 0.178748  | -0.930029 | -1.493285 |
| C | 1.694399  | -1.086032 | -1.217061 |
| N | 1.926820  | 0.012628  | -0.228360 |
| C | 0.789753  | 0.610365  | 0.059397  |
| N | -0.244492 | 0.129199  | -0.570000 |
| C | 2.119820  | -2.508938 | -0.786044 |
| C | 3.634179  | -2.570648 | -0.563044 |
| C | 1.780116  | -3.436462 | -1.961561 |
| C | 1.390874  | -2.988567 | 0.469396  |
| C | -1.651282 | 0.524827  | -0.465592 |
| C | 3.210217  | 0.541068  | 0.173581  |
| C | 4.000307  | 1.180634  | -0.792102 |
| C | 5.269953  | 1.604314  | -0.412447 |
| C | 5.718663  | 1.448147  | 0.886775  |
| C | 4.889742  | 0.883173  | 1.839234  |
| C | 3.620536  | 0.417697  | 1.508812  |
| C | 2.743416  | -0.150745 | 2.612499  |
| C | 3.417748  | -1.310822 | 3.347687  |
| C | 2.339021  | 0.950805  | 3.597025  |
| C | 3.523358  | 1.477142  | -2.205297 |
| C | 3.559181  | 2.981342  | -2.489469 |
| C | 4.333985  | 0.709234  | -3.251838 |
| C | -1.821130 | 1.794272  | 0.380876  |
| C | -2.488953 | -0.633678 | 0.046156  |
| C | -2.132208 | -1.321307 | 1.195788  |
| C | -2.952134 | -2.343414 | 1.664471  |
| C | -4.117380 | -2.673177 | 0.999947  |
| C | -4.476970 | -1.979792 | -0.155869 |
| C | -3.656169 | -0.965023 | -0.637096 |
| C | -3.261283 | 2.245388  | 0.397531  |
| C | -3.809147 | 2.888728  | -0.709317 |
| C | -5.146602 | 3.259197  | -0.721853 |
| C | -5.952952 | 2.992267  | 0.377297  |
| C | -5.412775 | 2.359443  | 1.488368  |
| C | -4.074810 | 1.988174  | 1.496397  |
| O | -5.636019 | -2.363496 | -0.745633 |
| C | -6.060772 | -1.660464 | -1.904393 |
| H | -0.034176 | -0.619862 | -2.517010 |
| H | -0.382920 | -1.838630 | -1.280568 |
| H | 2.260933  | -0.845034 | -2.116802 |
| H | 0.736590  | 1.439804  | 0.752339  |
| H | 3.954514  | -1.982216 | 0.296849  |
| H | 4.179038  | -2.211854 | -1.440809 |
| H | 3.932701  | -3.606188 | -0.386356 |
| H | 2.277820  | -3.110432 | -2.878931 |
| H | 0.706660  | -3.490817 | -2.155496 |
| H | 2.122214  | -4.448331 | -1.736549 |
| H | 1.640056  | -2.382628 | 1.341520  |
| H | 0.304141  | -2.983861 | 0.351582  |
| H | 1.686866  | -4.016154 | 0.690715  |

|   |           |           |           |
|---|-----------|-----------|-----------|
| H | -1.967051 | 0.752416  | -1.487847 |
| H | 5.910353  | 2.085550  | -1.143169 |
| H | 6.709699  | 1.789070  | 1.163181  |
| H | 5.235839  | 0.798817  | 2.863173  |
| H | 1.826660  | -0.537762 | 2.166674  |
| H | 2.730202  | -1.736283 | 4.081911  |
| H | 3.715609  | -2.106250 | 2.660991  |
| H | 4.309546  | -0.977103 | 3.882586  |
| H | 1.666091  | 0.549251  | 4.357628  |
| H | 1.830469  | 1.776766  | 3.093657  |
| H | 3.215651  | 1.361095  | 4.104229  |
| H | 2.478822  | 1.175294  | -2.294619 |
| H | 3.140839  | 3.182431  | -3.478000 |
| H | 2.976135  | 3.536996  | -1.752168 |
| H | 4.581062  | 3.366812  | -2.474878 |
| H | 3.938607  | 0.899730  | -4.251733 |
| H | 4.309405  | -0.369195 | -3.076394 |
| H | 5.380875  | 1.022098  | -3.238897 |
| H | -1.489564 | 1.601826  | 1.404674  |
| H | -1.193465 | 2.586441  | -0.036642 |
| H | -1.222848 | -1.070352 | 1.732351  |
| H | -2.677442 | -2.885627 | 2.561897  |
| H | -4.765118 | -3.464388 | 1.358434  |
| H | -3.916916 | -0.417233 | -1.534056 |
| H | -3.183423 | 3.105146  | -1.570148 |
| H | -5.559465 | 3.759456  | -1.590501 |
| H | -6.997805 | 3.280776  | 0.368962  |
| H | -6.034273 | 2.151907  | 2.352056  |
| H | -3.658899 | 1.487846  | 2.365213  |
| H | -7.003497 | -2.112918 | -2.201344 |
| H | -6.218578 | -0.600097 | -1.686760 |
| H | -5.336798 | -1.763833 | -2.717179 |

ωB97X energy = -1507.40988643 a.u.

(5*S*,1'*S*)-**10a**, Conf. A

|   |           |           |           |
|---|-----------|-----------|-----------|
| C | 3.277237  | -0.482547 | -1.121505 |
| C | 4.465555  | -1.167149 | -0.996121 |
| C | 5.521736  | -0.608310 | -0.270404 |
| C | 5.362632  | 0.638745  | 0.318868  |
| C | 4.151681  | 1.314168  | 0.184951  |
| C | 3.097120  | 0.772246  | -0.530318 |
| C | 1.756647  | 1.470206  | -0.690693 |
| C | 1.708223  | 2.909172  | -0.164965 |
| C | 0.360163  | 3.556378  | -0.363458 |
| C | -0.103789 | 3.856231  | -1.643250 |
| C | -1.351342 | 4.435024  | -1.827366 |
| C | -2.153505 | 4.727339  | -0.731334 |
| C | -1.698886 | 4.438779  | 0.547108  |
| C | -0.451371 | 3.855027  | 0.727324  |
| N | 0.706454  | 0.659399  | -0.059806 |
| C | -0.353988 | 0.183491  | -0.648168 |
| N | -1.119161 | -0.555877 | 0.125376  |
| C | -2.422647 | -1.030187 | -0.275186 |
| C | -2.521524 | -2.057349 | -1.225766 |

|   |           |           |           |
|---|-----------|-----------|-----------|
| C | -1.329864 | -2.648344 | -1.962420 |
| C | -1.242614 | -4.167136 | -1.796921 |
| C | -1.371836 | -2.270346 | -3.446237 |
| C | -3.792799 | -2.533293 | -1.531290 |
| C | -4.920295 | -2.016153 | -0.919280 |
| C | -4.799206 | -0.969863 | -0.022741 |
| C | -3.555268 | -0.434692 | 0.297465  |
| C | -3.497660 | 0.786191  | 1.202917  |
| C | -4.337362 | 1.929856  | 0.627178  |
| C | -3.945096 | 0.457332  | 2.629305  |
| C | -0.520948 | -0.648568 | 1.495180  |
| C | -0.166353 | -2.066541 | 2.002055  |
| C | 0.868735  | -2.766136 | 1.120227  |
| C | -1.425920 | -2.932180 | 2.109672  |
| C | 0.402299  | -1.890723 | 3.417362  |
| C | 0.696683  | 0.300461  | 1.361588  |
| C | 7.757849  | -0.821032 | 0.514770  |
| O | 6.651926  | -1.352160 | -0.201722 |
| H | 2.469208  | -0.932096 | -1.691388 |
| H | 4.602627  | -2.138315 | -1.456609 |
| H | 6.162132  | 1.098991  | 0.883618  |
| H | 4.058446  | 2.284414  | 0.657359  |
| H | 1.503757  | 1.486586  | -1.753920 |
| H | 1.970647  | 2.931040  | 0.895264  |
| H | 2.479241  | 3.474197  | -0.694041 |
| H | 0.520326  | 3.644506  | -2.506466 |
| H | -1.695731 | 4.664463  | -2.829401 |
| H | -3.127151 | 5.181871  | -0.874200 |
| H | -2.314130 | 4.670592  | 1.409316  |
| H | -0.099099 | 3.644459  | 1.732638  |
| H | -0.589443 | 0.380615  | -1.687317 |
| H | -0.414535 | -2.224631 | -1.547931 |
| H | -0.335474 | -4.542655 | -2.275359 |
| H | -1.216192 | -4.459028 | -0.744751 |
| H | -2.094490 | -4.667010 | -2.263166 |
| H | -0.486009 | -2.653336 | -3.957281 |
| H | -1.406263 | -1.187542 | -3.587762 |
| H | -2.252458 | -2.697195 | -3.932370 |
| H | -3.900470 | -3.327430 | -2.261301 |
| H | -5.898943 | -2.416072 | -1.158093 |
| H | -5.691412 | -0.543946 | 0.422085  |
| H | -2.468694 | 1.151114  | 1.239167  |
| H | -4.224012 | 2.822523  | 1.246050  |
| H | -4.021414 | 2.180718  | -0.387745 |
| H | -5.398957 | 1.673962  | 0.601886  |
| H | -3.854364 | 1.338885  | 3.267442  |
| H | -3.350705 | -0.345549 | 3.072379  |
| H | -4.990634 | 0.139440  | 2.642686  |
| H | -1.240070 | -0.227865 | 2.198306  |
| H | 0.494881  | -2.935080 | 0.109787  |
| H | 1.805643  | -2.207862 | 1.046453  |
| H | 1.107415  | -3.742583 | 1.546982  |
| H | -2.195421 | -2.440892 | 2.711693  |
| H | -1.175524 | -3.876696 | 2.597523  |
| H | -1.858296 | -3.166406 | 1.137116  |
| H | -0.313958 | -1.384563 | 4.070299  |

|   |          |           |          |
|---|----------|-----------|----------|
| H | 1.334989 | -1.322508 | 3.427988 |
| H | 0.612694 | -2.871361 | 3.848036 |
| H | 0.585391 | 1.200411  | 1.967391 |
| H | 1.639398 | -0.179048 | 1.620714 |
| H | 8.104457 | 0.114553  | 0.067839 |
| H | 7.505162 | -0.654187 | 1.565237 |
| H | 8.545247 | -1.567433 | 0.447342 |

ωB97X energy = -1507.41208871 a.u.

(5S,1'S)-**10a**, Conf. B

|   |           |           |           |
|---|-----------|-----------|-----------|
| C | 3.373716  | -0.354642 | -1.238906 |
| C | 4.570619  | -1.030668 | -1.149798 |
| C | 5.560993  | -0.586167 | -0.269085 |
| C | 5.329600  | 0.539855  | 0.510447  |
| C | 4.112284  | 1.208721  | 0.408682  |
| C | 3.122636  | 0.778722  | -0.459341 |
| C | 1.774214  | 1.464257  | -0.580588 |
| C | 1.697340  | 2.867593  | 0.032056  |
| C | 0.377779  | 3.542737  | -0.246769 |
| C | 0.070284  | 3.980609  | -1.534454 |
| C | -1.147327 | 4.586915  | -1.805173 |
| C | -2.077215 | 4.768190  | -0.788548 |
| C | -1.779899 | 4.339856  | 0.496853  |
| C | -0.561460 | 3.727152  | 0.763302  |
| N | 0.735359  | 0.596965  | -0.005162 |
| C | -0.382606 | 0.252437  | -0.579876 |
| N | -1.135763 | -0.552172 | 0.139595  |
| C | -2.481428 | -0.927004 | -0.225448 |
| C | -2.691083 | -1.782748 | -1.317718 |
| C | -1.585228 | -2.270666 | -2.240547 |
| C | -1.524228 | -3.797920 | -2.315062 |
| C | -1.750652 | -1.670418 | -3.640112 |
| C | -3.997920 | -2.178036 | -1.586464 |
| C | -5.054852 | -1.748125 | -0.804810 |
| C | -4.827235 | -0.866002 | 0.235899  |
| C | -3.544829 | -0.414526 | 0.531764  |
| C | -3.374207 | 0.632750  | 1.621779  |
| C | -4.237162 | 1.864799  | 1.336571  |
| C | -3.694708 | 0.067545  | 3.008063  |
| C | -0.444723 | -0.875820 | 1.428516  |
| C | -0.078665 | -2.362359 | 1.653847  |
| C | 0.887221  | -2.894966 | 0.594274  |
| C | -1.341510 | -3.229192 | 1.689739  |
| C | 0.581957  | -2.446887 | 3.037248  |
| C | 0.773463  | 0.076969  | 1.365584  |
| C | 7.741612  | -0.900862 | 0.630147  |
| O | 6.704957  | -1.311540 | -0.250383 |
| H | 2.616177  | -0.711401 | -1.930922 |
| H | 4.765074  | -1.906944 | -1.756750 |
| H | 6.077284  | 0.909389  | 1.199198  |
| H | 3.959843  | 2.083982  | 1.028918  |
| H | 1.527627  | 1.542286  | -1.642035 |
| H | 1.867375  | 2.818591  | 1.110146  |
| H | 2.515214  | 3.453520  | -0.393267 |
| H | 0.796584  | 3.855827  | -2.332276 |

|                                            |           |           |           |   |           |           |           |
|--------------------------------------------|-----------|-----------|-----------|---|-----------|-----------|-----------|
| H                                          | -1.368361 | 4.926018  | -2.810890 | C | -0.354986 | 0.257793  | -0.560832 |
| H                                          | -3.027079 | 5.246874  | -0.997278 | N | -1.073246 | -0.577018 | 0.159401  |
| H                                          | -2.496803 | 4.483711  | 1.297060  | C | -2.332901 | -1.123760 | -0.284536 |
| H                                          | -0.333935 | 3.403660  | 1.774680  | C | -2.350647 | -2.064424 | -1.325689 |
| H                                          | -0.669393 | 0.602962  | -1.564486 | C | -1.119796 | -2.480348 | -2.116021 |
| H                                          | -0.625152 | -1.927561 | -1.853641 | C | -0.899400 | -3.994301 | -2.091460 |
| H                                          | -0.680288 | -4.106806 | -2.935743 | C | -1.211904 | -1.973219 | -3.558674 |
| H                                          | -1.400151 | -4.248238 | -1.327843 | C | -3.579085 | -2.616353 | -1.675445 |
| H                                          | -2.432098 | -4.210091 | -2.760830 | C | -4.742855 | -2.253553 | -1.021611 |
| H                                          | -0.920717 | -1.973944 | -4.281679 | C | -4.704892 | -1.287076 | -0.033037 |
| H                                          | -1.779533 | -0.578670 | -3.611496 | C | -3.508355 | -0.681787 | 0.338436  |
| H                                          | -2.678019 | -2.014727 | -4.104106 | C | -3.547067 | 0.446877  | 1.357311  |
| H                                          | -4.189945 | -2.841037 | -2.422540 | C | -4.474695 | 1.572279  | 0.891062  |
| H                                          | -6.062249 | -2.084552 | -1.020866 | C | -3.963911 | -0.055601 | 2.741758  |
| H                                          | -5.666173 | -0.503147 | 0.818823  | C | -0.461249 | -0.733358 | 1.517588  |
| H                                          | -2.337669 | 0.977223  | 1.618148  | C | 0.037588  | -2.151110 | 1.885731  |
| H                                          | -4.048226 | 2.631312  | 2.091535  | C | 0.599241  | -2.060427 | 3.311817  |
| H                                          | -4.010981 | 2.290189  | 0.356566  | C | 1.129142  | -2.650959 | 0.938459  |
| H                                          | -5.302091 | 1.624528  | 1.369051  | C | -1.128466 | -3.144780 | 1.906991  |
| H                                          | -3.517502 | 0.823937  | 3.775535  | C | 0.653813  | 0.340150  | 1.469463  |
| H                                          | -3.087800 | -0.808763 | 3.248455  | C | 7.169833  | -1.818295 | -0.472567 |
| H                                          | -4.743745 | -0.232629 | 3.068789  | O | 6.770138  | -0.682416 | 0.281842  |
| H                                          | -1.104377 | -0.579538 | 2.243113  | H | 2.750189  | -0.393376 | -1.840756 |
| H                                          | 0.448950  | -2.872333 | -0.404460 | H | 4.916727  | -1.473506 | -1.554233 |
| H                                          | 1.827508  | -2.338091 | 0.565503  | H | 5.884188  | 1.308220  | 1.562996  |
| H                                          | 1.134213  | -3.935110 | 0.817075  | H | 3.703583  | 2.394839  | 1.273886  |
| H                                          | -2.060159 | -2.854579 | 2.424004  | H | 1.462632  | 1.693064  | -1.577716 |
| H                                          | -1.073292 | -4.247896 | 1.977906  | H | 1.636506  | 3.104992  | 1.124761  |
| H                                          | -1.842621 | -3.280178 | 0.723607  | H | 2.271896  | 3.715078  | -0.393319 |
| H                                          | -0.085377 | -2.067669 | 3.815910  | H | 0.566692  | 3.924162  | -2.376231 |
| H                                          | 1.520690  | -1.891619 | 3.090596  | H | -1.670756 | 4.782203  | -2.940502 |
| H                                          | 0.806662  | -3.490052 | 3.267480  | H | -3.394337 | 5.023497  | -1.176076 |
| H                                          | 0.688225  | 0.903248  | 2.073544  | H | -2.853569 | 4.399776  | 1.158618  |
| H                                          | 1.720764  | -0.429784 | 1.538565  | H | -0.615885 | 3.538906  | 1.723135  |
| H                                          | 8.092371  | 0.105104  | 0.384931  | H | -0.596250 | 0.501414  | -1.588749 |
| H                                          | 7.409014  | -0.929758 | 1.671185  | H | -0.239046 | -2.019282 | -1.667857 |
| H                                          | 8.552640  | -1.611062 | 0.490386  | H | 0.028622  | -4.243665 | -2.610532 |
| $\omega$ B97X energy = -1507.41180317 a.u. |           |           |           | H | -0.829419 | -4.377434 | -1.071005 |
| (5S,1'S)-10a, Conf. C                      |           |           |           | H | -1.712909 | -4.522060 | -2.593964 |
| C                                          | 3.430736  | -0.011160 | -1.085179 | H | -0.301548 | -2.226157 | -4.106273 |
| C                                          | 4.661945  | -0.631160 | -0.925315 | H | -1.345169 | -0.889452 | -3.600189 |
| C                                          | 5.546906  | -0.153339 | 0.038233  | H | -2.056823 | -2.431049 | -4.078706 |
| C                                          | 5.185493  | 0.942882  | 0.819826  | H | -3.623445 | -3.348349 | -2.473903 |
| C                                          | 3.953915  | 1.546284  | 0.647848  | H | -5.685848 | -2.710457 | -1.298547 |
| C                                          | 3.054380  | 1.077036  | -0.307931 | H | -5.627182 | -0.980357 | 0.447178  |
| C                                          | 1.672728  | 1.673655  | -0.505824 | H | -2.550065 | 0.885541  | 1.435052  |
| C                                          | 1.487055  | 3.092882  | 0.042794  | H | -4.445167 | 2.397163  | 1.606551  |
| C                                          | 0.127469  | 3.656062  | -0.288631 | H | -4.169554 | 1.958587  | -0.083987 |
| C                                          | -0.185672 | 4.016604  | -1.598435 | H | -5.510403 | 1.233467  | 0.816758  |
| C                                          | -1.444738 | 4.503526  | -1.917494 | H | -3.945697 | 0.762847  | 3.464378  |
| C                                          | -2.411163 | 4.639955  | -0.928453 | H | -3.303025 | -0.845773 | 3.106803  |
| C                                          | -2.107991 | 4.290187  | 0.379280  | H | -4.978811 | -0.460095 | 2.717537  |
| C                                          | -0.846927 | 3.799399  | 0.694539  | H | -1.211563 | -0.453558 | 2.256477  |
| N                                          | 0.666027  | 0.767480  | 0.067019  | H | 1.473169  | -1.409001 | 3.379576  |
|                                            |           |           |           | H | -0.156151 | -1.692913 | 4.011689  |
|                                            |           |           |           | H | 0.907275  | -3.053855 | 3.643236  |

|   |           |           |           |
|---|-----------|-----------|-----------|
| H | 0.758671  | -2.771685 | -0.080291 |
| H | 1.483734  | -3.627662 | 1.274327  |
| H | 1.995765  | -1.984725 | 0.908985  |
| H | -1.552878 | -3.315056 | 0.917740  |
| H | -1.931817 | -2.800486 | 2.564342  |
| H | -0.777544 | -4.106318 | 2.288007  |
| H | 0.431060  | 1.194118  | 2.110847  |
| H | 1.632702  | -0.051000 | 1.740422  |
| H | 7.227003  | -1.585091 | -1.539030 |
| H | 8.158220  | -2.087227 | -0.108669 |
| H | 6.484387  | -2.655558 | -0.316443 |

ωB97X energy = -1507.41179187 a.u.

(5S,1'S)-10a, Conf. D

|   |           |           |           |
|---|-----------|-----------|-----------|
| C | -4.120106 | 1.432335  | 0.966222  |
| C | -5.366872 | 0.855366  | 0.820541  |
| C | -5.590061 | -0.080953 | -0.188208 |
| C | -4.549967 | -0.427842 | -1.046785 |
| C | -3.305140 | 0.166396  | -0.887600 |
| C | -3.069513 | 1.098141  | 0.113815  |
| C | -1.718724 | 1.765177  | 0.278973  |
| C | -1.342743 | 2.674132  | -0.897801 |
| C | -0.017086 | 3.377987  | -0.717046 |
| C | 0.997999  | 3.230745  | -1.656708 |
| C | 2.227536  | 3.855894  | -1.483380 |
| C | 2.456808  | 4.640631  | -0.363724 |
| C | 1.445085  | 4.806370  | 0.574865  |
| C | 0.219695  | 4.182125  | 0.397791  |
| N | -0.662057 | 0.784691  | 0.568539  |
| C | 0.057801  | 0.099577  | -0.273848 |
| N | 0.918277  | -0.721667 | 0.290687  |
| C | 1.652430  | -1.731829 | -0.435542 |
| C | 1.269984  | -3.070999 | -0.271777 |
| C | 0.029368  | -3.501753 | 0.495589  |
| C | -0.942089 | -4.250427 | -0.421452 |
| C | 0.382133  | -4.350070 | 1.719441  |
| C | 2.045656  | -4.047085 | -0.889263 |
| C | 3.128475  | -3.706932 | -1.679840 |
| C | 3.436721  | -2.374941 | -1.890046 |
| C | 2.709402  | -1.357897 | -1.279089 |
| C | 3.070578  | 0.083626  | -1.600152 |
| C | 4.523202  | 0.415845  | -1.252892 |
| C | 2.789982  | 0.384924  | -3.075958 |
| C | 0.848463  | -0.585370 | 1.780672  |
| C | 2.131275  | -0.065664 | 2.471526  |
| C | 2.537575  | 1.324039  | 1.978633  |
| C | 3.282646  | -1.055100 | 2.266123  |
| C | 1.831430  | -0.008886 | 3.976074  |
| C | -0.380299 | 0.340415  | 1.937439  |
| C | -7.120001 | -1.543400 | -1.279335 |
| O | -6.840951 | -0.598081 | -0.255863 |
| H | -3.961014 | 2.158295  | 1.757201  |
| H | -6.182781 | 1.115979  | 1.484123  |
| H | -4.692813 | -1.151998 | -1.837414 |
| H | -2.515355 | -0.120618 | -1.575232 |

|   |           |           |           |
|---|-----------|-----------|-----------|
| H | -1.762249 | 2.383660  | 1.177447  |
| H | -1.343530 | 2.106946  | -1.832584 |
| H | -2.151002 | 3.403684  | -0.989124 |
| H | 0.825540  | 2.631303  | -2.545666 |
| H | 3.005713  | 3.730895  | -2.228806 |
| H | 3.414980  | 5.127667  | -0.224663 |
| H | 1.611109  | 5.426867  | 1.448189  |
| H | -0.561890 | 4.329409  | 1.136843  |
| H | -0.042061 | 0.174497  | -1.349131 |
| H | -0.499542 | -2.611265 | 0.838288  |
| H | -1.859082 | -4.488736 | 0.121807  |
| H | -1.207974 | -3.647138 | -1.292177 |
| H | -0.511503 | -5.188869 | -0.778070 |
| H | -0.521947 | -4.603545 | 2.276917  |
| H | 1.064429  | -3.828832 | 2.395624  |
| H | 0.863870  | -5.283912 | 1.419815  |
| H | 1.785082  | -5.092023 | -0.763440 |
| H | 3.719844  | -4.482028 | -2.153344 |
| H | 4.262619  | -2.117006 | -2.543404 |
| H | 2.438443  | 0.747289  | -1.008979 |
| H | 4.714860  | 1.475782  | -1.437309 |
| H | 4.747030  | 0.211201  | -0.203906 |
| H | 5.219969  | -0.160420 | -1.865666 |
| H | 2.999443  | 1.434644  | -3.294657 |
| H | 1.749065  | 0.181456  | -3.340180 |
| H | 3.422163  | -0.223649 | -3.726771 |
| H | 0.633406  | -1.568242 | 2.198770  |
| H | 2.778516  | 1.328164  | 0.914137  |
| H | 1.759625  | 2.072974  | 2.148492  |
| H | 3.428823  | 1.655233  | 2.515902  |
| H | 3.007110  | -2.058117 | 2.604528  |
| H | 4.147529  | -0.732861 | 2.850078  |
| H | 3.593643  | -1.125900 | 1.224401  |
| H | 1.521663  | -0.986799 | 4.354593  |
| H | 1.052920  | 0.715418  | 4.224036  |
| H | 2.734204  | 0.287386  | 4.513559  |
| H | -1.254244 | -0.179982 | 2.333784  |
| H | -0.176409 | 1.207835  | 2.563373  |
| H | -8.165152 | -1.816327 | -1.157725 |
| H | -6.971577 | -1.106494 | -2.270418 |
| H | -6.497273 | -2.435798 | -1.174466 |

ωB97X energy = -1507.41073688 a.u.

(5S,1'S)-10a, Conf. E

|   |           |           |           |
|---|-----------|-----------|-----------|
| C | 3.280170  | 0.297513  | 1.327761  |
| C | 4.475423  | -0.354379 | 1.544636  |
| C | 5.485072  | -0.311029 | 0.579586  |
| C | 5.277419  | 0.392584  | -0.600482 |
| C | 4.063672  | 1.042173  | -0.802630 |
| C | 3.053428  | 1.006709  | 0.145422  |
| C | 1.743052  | 1.718110  | -0.120689 |
| C | 1.304921  | 2.666828  | 1.001902  |
| C | 0.026519  | 3.407799  | 0.686002  |
| C | -1.107652 | 3.244075  | 1.474797  |
| C | -2.292225 | 3.902704  | 1.165887  |

|   |           |           |           |
|---|-----------|-----------|-----------|
| C | -2.354839 | 4.739015  | 0.061525  |
| C | -1.223819 | 4.921443  | -0.725276 |
| C | -0.044461 | 4.261757  | -0.414337 |
| N | 0.672815  | 0.765634  | -0.468545 |
| C | -0.058816 | 0.053428  | 0.339219  |
| N | -0.937534 | -0.720910 | -0.262238 |
| C | -1.685553 | -1.748420 | 0.424995  |
| C | -2.743312 | -1.389883 | 1.274139  |
| C | -3.103191 | 0.046369  | 1.618317  |
| C | -4.556922 | 0.380285  | 1.276868  |
| C | -2.820879 | 0.333482  | 3.096434  |
| C | -3.476324 | -2.417514 | 1.859912  |
| C | -3.174064 | -3.745452 | 1.617423  |
| C | -2.093416 | -4.071837 | 0.817938  |
| C | -1.311144 | -3.084971 | 0.226310  |
| C | -0.073221 | -3.502134 | -0.552669 |
| C | 0.887380  | -4.295295 | 0.337912  |
| C | -0.433254 | -4.301228 | -1.807204 |
| C | -0.855457 | -0.527553 | -1.745335 |
| C | -2.129431 | 0.016294  | -2.433659 |
| C | -1.806854 | 0.130114  | -3.930320 |
| C | -2.547906 | 1.385679  | -1.896321 |
| C | -3.281267 | -0.982192 | -2.281828 |
| C | 0.375983  | 0.402680  | -1.858094 |
| C | 7.678758  | -0.965116 | -0.068162 |
| O | 6.623716  | -0.979540 | 0.883390  |
| H | 2.521215  | 0.251196  | 2.102233  |
| H | 4.652951  | -0.902028 | 2.462521  |
| H | 6.040565  | 0.446021  | -1.365065 |
| H | 3.913785  | 1.589565  | -1.727869 |
| H | 1.868458  | 2.313029  | -1.027081 |
| H | 1.198242  | 2.125417  | 1.945081  |
| H | 2.126933  | 3.371470  | 1.148065  |
| H | -1.064550 | 2.605663  | 2.352612  |
| H | -3.166188 | 3.763361  | 1.793375  |
| H | -3.277195 | 5.253696  | -0.181569 |
| H | -1.259780 | 5.584026  | -1.582592 |
| H | 0.834061  | 4.421919  | -1.032093 |
| H | 0.044625  | 0.071473  | 1.416681  |
| H | -2.471563 | 0.715366  | 1.033175  |
| H | -4.750426 | 1.438109  | 1.470617  |
| H | -4.782784 | 0.183577  | 0.226788  |
| H | -5.251460 | -0.202027 | 1.886447  |
| H | -3.037875 | 1.379702  | 3.326110  |
| H | -1.777890 | 0.135612  | 3.356784  |
| H | -3.447254 | -0.285856 | 3.742804  |
| H | -4.302119 | -2.171383 | 2.517945  |
| H | -3.769349 | -4.529065 | 2.071625  |
| H | -1.839341 | -5.114868 | 0.665683  |
| H | 0.466652  | -2.605697 | -0.861424 |
| H | 1.803808  | -4.521846 | -0.211238 |
| H | 1.156255  | -3.728731 | 1.232007  |
| H | 0.446326  | -5.242461 | 0.656425  |
| H | 0.469141  | -4.546895 | -2.370920 |
| H | -1.106042 | -3.746505 | -2.465944 |
| H | -0.928864 | -5.238458 | -1.542710 |

|   |           |           |           |
|---|-----------|-----------|-----------|
| H | -0.636320 | -1.495251 | -2.196040 |
| H | -1.028643 | 0.867475  | -4.138269 |
| H | -1.485459 | -0.831269 | -4.340246 |
| H | -2.702846 | 0.441722  | -4.470476 |
| H | -2.821696 | 1.346347  | -0.841204 |
| H | -3.421549 | 1.741051  | -2.447005 |
| H | -1.764758 | 2.140134  | -2.009860 |
| H | -3.600767 | -1.098831 | -1.246649 |
| H | -3.001528 | -1.968837 | -2.662241 |
| H | -4.141757 | -0.635569 | -2.858278 |
| H | 1.243183  | -0.096610 | -2.294104 |
| H | 0.169092  | 1.306322  | -2.429457 |
| H | 8.029280  | 0.053740  | -0.252931 |
| H | 8.484334  | -1.550694 | 0.367446  |
| H | 7.365647  | -1.422073 | -1.010673 |

ωB97X energy = -1507.41071224 a.u.

(5S,1'S)-**10a**, Conf. F

|   |           |           |           |
|---|-----------|-----------|-----------|
| C | 3.312252  | 0.382252  | -1.206332 |
| C | 4.526703  | -0.249315 | -1.058872 |
| C | 5.337651  | 0.039367  | 0.043124  |
| C | 4.908337  | 0.966307  | 0.982076  |
| C | 3.673746  | 1.592232  | 0.818999  |
| C | 2.858894  | 1.314388  | -0.265420 |
| C | 1.509854  | 1.984954  | -0.479780 |
| C | 1.102443  | 2.964357  | 0.628253  |
| C | -0.282156 | 3.540437  | 0.457245  |
| C | -1.295115 | 3.215015  | 1.354839  |
| C | -2.571471 | 3.745534  | 1.212097  |
| C | -2.851454 | 4.607939  | 0.162743  |
| C | -1.848324 | 4.938472  | -0.740954 |
| C | -0.573886 | 4.410835  | -0.592295 |
| N | 0.465990  | 0.964321  | -0.688705 |
| C | 0.129715  | 0.035615  | 0.159126  |
| N | -0.893386 | -0.702908 | -0.216719 |
| C | -1.216749 | -1.944828 | 0.448272  |
| C | -2.044145 | -1.919123 | 1.578477  |
| C | -2.535348 | -0.632953 | 2.220560  |
| C | -4.056892 | -0.602642 | 2.374208  |
| C | -1.850196 | -0.413378 | 3.572694  |
| C | -2.382342 | -3.138655 | 2.156778  |
| C | -1.911892 | -4.332359 | 1.637811  |
| C | -1.051028 | -4.325538 | 0.554262  |
| C | -0.664651 | -3.132754 | -0.049030 |
| C | 0.370181  | -3.170156 | -1.163069 |
| C | 1.684417  | -3.774442 | -0.660611 |
| C | -0.141556 | -3.918751 | -2.394955 |
| C | -1.306053 | -0.318200 | -1.604981 |
| C | -2.811246 | -0.118877 | -1.888183 |
| C | -3.443836 | 0.986638  | -1.044017 |
| C | -3.575710 | -1.430321 | -1.679041 |
| C | -2.914157 | 0.260636  | -3.372817 |
| C | -0.440665 | 0.942840  | -1.842128 |
| C | 7.373146  | -0.367384 | 1.205112  |
| O | 6.514083  | -0.630044 | 0.104478  |



|                                            |           |           |           |   |           |           |           |
|--------------------------------------------|-----------|-----------|-----------|---|-----------|-----------|-----------|
| H                                          | 2.701569  | 0.145104  | -2.072136 | C | 0.548507  | 3.233191  | 0.752211  |
| H                                          | 4.872988  | -0.970832 | -1.789406 | C | -0.837980 | 3.777501  | 0.516285  |
| H                                          | 5.512503  | 1.213839  | 1.844488  | C | -1.069691 | 4.709711  | -0.494236 |
| H                                          | 3.370578  | 2.310093  | 1.570676  | C | -2.349171 | 5.185838  | -0.737931 |
| H                                          | 1.542579  | 2.528474  | -1.427244 | C | -3.417735 | 4.739682  | 0.031260  |
| H                                          | 1.160325  | 2.461108  | 1.596773  | C | -3.195963 | 3.819595  | 1.045533  |
| H                                          | 1.840939  | 3.769364  | 0.644349  | C | -1.912894 | 3.341501  | 1.284048  |
| H                                          | -1.080068 | 2.549455  | 2.186443  | N | 0.085830  | 1.133599  | -0.495580 |
| H                                          | -3.345981 | 3.482597  | 1.924069  | C | 0.118000  | 0.031597  | 0.196411  |
| H                                          | -3.845281 | 5.025173  | 0.048790  | N | -0.798506 | -0.854533 | -0.139036 |
| H                                          | -2.057640 | 5.617726  | -1.559487 | C | -0.686048 | -2.237451 | 0.272100  |
| H                                          | 0.205251  | 4.688762  | -1.295994 | C | -1.270824 | -2.644931 | 1.477977  |
| H                                          | 0.656332  | -0.135037 | 1.091225  | C | -1.917659 | -1.681233 | 2.457744  |
| H                                          | -2.250620 | 0.201110  | 1.577631  | C | -3.357030 | -2.075327 | 2.794550  |
| H                                          | -4.373171 | 0.369998  | 2.758404  | C | -1.076067 | -1.572681 | 3.732994  |
| H                                          | -4.563402 | -0.771399 | 1.421282  | C | -1.198124 | -3.995450 | 1.806124  |
| H                                          | -4.401387 | -1.363816 | 3.077894  | C | -0.558391 | -4.900806 | 0.978035  |
| H                                          | -2.172299 | 0.535415  | 4.008444  | C | 0.064408  | -4.461837 | -0.176962 |
| H                                          | -0.762391 | -0.390912 | 3.472118  | C | 0.034405  | -3.120178 | -0.544683 |
| H                                          | -2.105271 | -1.210307 | 4.275784  | C | 0.825009  | -2.678484 | -1.767120 |
| H                                          | -3.023318 | -3.153330 | 3.031075  | C | 2.319506  | -2.949603 | -1.571863 |
| H                                          | -2.198402 | -5.272088 | 2.095709  | C | 0.309567  | -3.337762 | -3.047734 |
| H                                          | -0.654149 | -5.263719 | 0.182607  | C | -1.538840 | -0.368756 | -1.347571 |
| H                                          | 0.601379  | -2.146996 | -1.464433 | C | -3.076111 | -0.507291 | -1.360458 |
| H                                          | 2.441585  | -3.726968 | -1.446421 | C | -3.547273 | 0.094543  | -2.692337 |
| H                                          | 2.060785  | -3.231930 | 0.209622  | C | -3.758950 | 0.227534  | -0.207789 |
| H                                          | 1.558858  | -4.822569 | -0.379717 | C | -3.476829 | -1.986498 | -1.342112 |
| H                                          | 0.606956  | -3.893880 | -3.189553 | C | -1.023333 | 1.086957  | -1.457270 |
| H                                          | -1.063688 | -3.478577 | -2.782812 | C | 7.050660  | 0.325119  | 1.218826  |
| H                                          | -0.345913 | -4.966150 | -2.160344 | O | 6.268386  | 0.177561  | 0.041771  |
| H                                          | -0.968610 | -1.120714 | -2.266057 | H | 2.748794  | 2.432399  | 1.834367  |
| H                                          | -3.383806 | 0.772652  | 0.022946  | H | 4.994469  | 1.538514  | 2.028395  |
| H                                          | -2.985434 | 1.963357  | -1.214256 | H | 4.755477  | 0.031622  | -1.979855 |
| H                                          | -4.501224 | 1.077006  | -1.302612 | H | 2.475846  | 0.945889  | -2.178837 |
| H                                          | -3.115070 | -2.254159 | -2.231523 | H | 0.953338  | 2.794078  | -1.306753 |
| H                                          | -4.598377 | -1.315075 | -2.044614 | H | 0.579870  | 2.724097  | 1.718438  |
| H                                          | -3.629757 | -1.717591 | -0.628493 | H | 1.268075  | 4.054343  | 0.794804  |
| H                                          | -2.480311 | -0.512521 | -4.012776 | H | -0.239394 | 5.069815  | -1.094558 |
| H                                          | -2.415192 | 1.207840  | -3.591873 | H | -2.513194 | 5.911927  | -1.526049 |
| H                                          | -3.964801 | 0.373003  | -3.646843 | H | -4.417409 | 5.114250  | -0.156209 |
| H                                          | 0.131678  | 0.887089  | -2.767076 | H | -4.022814 | 3.469851  | 1.653474  |
| H                                          | -1.028835 | 1.861578  | -1.846738 | H | -1.745323 | 2.618122  | 2.076424  |
| H                                          | 8.246897  | -0.997980 | 1.061739  | H | 0.858553  | -0.161176 | 0.963800  |
| H                                          | 7.680892  | 0.681515  | 1.223411  | H | -1.938734 | -0.691386 | 2.000063  |
| H                                          | 6.890617  | -0.624096 | 2.151936  | H | -3.811543 | -1.317818 | 3.436956  |
| $\omega$ B97X energy = -1507.40984394 a.u. |           |           |           | H | -3.972176 | -2.172063 | 1.897135  |
| (5S,1'S)-10a, Conf. G                      |           |           |           | H | -3.392466 | -3.027303 | 3.329285  |
| C                                          | 3.165055  | 1.907855  | 0.983001  | H | -1.514427 | -0.839074 | 4.413223  |
| C                                          | 4.456182  | 1.396783  | 1.101029  | H | -0.051478 | -1.264517 | 3.512767  |
| C                                          | 5.025789  | 0.716344  | 0.033627  | H | -1.032194 | -2.531810 | 4.255057  |
| C                                          | 4.298408  | 0.558255  | -1.150400 | H | -1.645963 | -4.343377 | 2.730153  |
| C                                          | 3.026092  | 1.074183  | -1.251028 | H | -0.522801 | -5.950259 | 1.246878  |
| C                                          | 2.432979  | 1.756190  | -0.182201 | H | 0.602540  | -5.171579 | -0.795450 |
| C                                          | 1.015001  | 2.274031  | -0.347348 | H | 0.724181  | -1.598672 | -1.886355 |
|                                            |           |           |           | H | 2.881645  | -2.577797 | -2.431609 |
|                                            |           |           |           | H | 2.698342  | -2.449829 | -0.677113 |

|   |           |           |           |
|---|-----------|-----------|-----------|
| H | 2.520421  | -4.019001 | -1.475149 |
| H | 0.858581  | -2.962150 | -3.913617 |
| H | -0.753375 | -3.138313 | -3.205420 |
| H | 0.442493  | -4.421580 | -3.011277 |
| H | -1.168931 | -0.950963 | -2.195933 |
| H | -3.341291 | 1.165727  | -2.757509 |
| H | -3.069257 | -0.399432 | -3.542720 |
| H | -4.626243 | -0.038596 | -2.790957 |
| H | -3.445209 | -0.155524 | 0.763207  |
| H | -4.839617 | 0.088263  | -0.283302 |
| H | -3.568575 | 1.302617  | -0.225091 |
| H | -3.237129 | -2.472202 | -0.395747 |
| H | -2.980948 | -2.542037 | -2.143281 |
| H | -4.554702 | -2.072658 | -1.495717 |
| H | -0.657747 | 1.326876  | -2.454969 |
| H | -1.778867 | 1.819586  | -1.170565 |
| H | 6.567826  | -0.151897 | 2.075857  |
| H | 7.996788  | -0.169810 | 1.015263  |
| H | 7.232304  | 1.380150  | 1.440383  |

ωB97X energy = -1507.40977219 a.u.

(5S,1'S)-10a, Conf. H

|   |           |           |           |
|---|-----------|-----------|-----------|
| C | 3.687801  | 0.497106  | 1.100759  |
| C | 4.628367  | 1.507750  | 0.927588  |
| C | 4.459777  | 2.426345  | -0.101591 |
| C | 3.350954  | 2.323322  | -0.946069 |
| C | 2.432518  | 1.310827  | -0.763166 |
| C | 2.590605  | 0.380290  | 0.265164  |
| C | 1.615053  | -0.763284 | 0.446161  |
| C | 1.743302  | -1.837695 | -0.642159 |
| C | 3.115592  | -2.464671 | -0.628638 |
| C | 3.436312  | -3.424601 | 0.327845  |
| C | 4.706248  | -3.982246 | 0.373092  |
| C | 5.672532  | -3.586197 | -0.542521 |
| C | 5.360324  | -2.633318 | -1.502573 |
| C | 4.089087  | -2.076136 | -1.543581 |
| N | 0.244060  | -0.244779 | 0.528046  |
| C | -0.791939 | -0.560880 | -0.195371 |
| N | -1.915151 | 0.015662  | 0.180302  |
| C | -3.101753 | 0.007110  | -0.644575 |
| C | -3.932789 | -1.121663 | -0.641754 |
| C | -3.596653 | -2.409469 | 0.091128  |
| C | -4.704263 | -2.833648 | 1.057465  |
| C | -3.295462 | -3.530186 | -0.908897 |
| C | -5.102723 | -1.062571 | -1.392875 |
| C | -5.431648 | 0.066988  | -2.121236 |
| C | -4.565834 | 1.145816  | -2.152410 |
| C | -3.372327 | 1.131001  | -1.437245 |
| C | -2.407646 | 2.296539  | -1.594336 |
| C | -1.997371 | 2.467613  | -3.059869 |
| C | -2.989791 | 3.598392  | -1.039593 |
| C | -1.658182 | 0.933973  | 1.332762  |
| C | -2.538727 | 0.755019  | 2.590178  |
| C | -2.411411 | -0.636352 | 3.209923  |
| C | -4.007454 | 1.045328  | 2.264113  |

|   |           |           |           |
|---|-----------|-----------|-----------|
| C | -2.062787 | 1.809650  | 3.599434  |
| C | -0.146692 | 0.704439  | 1.576853  |
| C | 6.452084  | 3.596458  | 0.468250  |
| O | 5.307610  | 3.451866  | -0.360641 |
| H | 3.827088  | -0.215529 | 1.907454  |
| H | 5.473748  | 1.565125  | 1.599853  |
| H | 3.230266  | 3.050883  | -1.739938 |
| H | 1.576207  | 1.250609  | -1.429253 |
| H | 1.813736  | -1.234044 | 1.414096  |
| H | 0.992709  | -2.614271 | -0.470243 |
| H | 1.551667  | -1.393422 | -1.622517 |
| H | 2.683180  | -3.742941 | 1.042446  |
| H | 4.940682  | -4.730177 | 1.122004  |
| H | 6.664302  | -4.022484 | -0.509693 |
| H | 6.108106  | -2.321818 | -2.223010 |
| H | 3.850848  | -1.328576 | -2.293637 |
| H | -0.748289 | -1.228527 | -1.046089 |
| H | -2.690848 | -2.248748 | 0.676544  |
| H | -4.395838 | -3.723138 | 1.611252  |
| H | -4.935371 | -2.048243 | 1.780495  |
| H | -5.624753 | -3.078596 | 0.522876  |
| H | -2.991779 | -4.436164 | -0.380077 |
| H | -2.494140 | -3.251349 | -1.597298 |
| H | -4.179211 | -3.769118 | -1.505783 |
| H | -5.768793 | -1.918035 | -1.408171 |
| H | -6.356195 | 0.097175  | -2.686152 |
| H | -4.811960 | 2.009093  | -2.760593 |
| H | -1.490999 | 2.073300  | -1.045057 |
| H | -1.245231 | 3.254702  | -3.146440 |
| H | -1.574758 | 1.544805  | -3.462710 |
| H | -2.849335 | 2.750265  | -3.682286 |
| H | -2.260892 | 4.406544  | -1.128676 |
| H | -3.266908 | 3.505395  | 0.013440  |
| H | -3.885370 | 3.890679  | -1.593118 |
| H | -1.821582 | 1.952368  | 0.975723  |
| H | -2.736576 | -1.418351 | 2.523532  |
| H | -1.390537 | -0.863014 | 3.524838  |
| H | -3.043148 | -0.695695 | 4.098765  |
| H | -4.122954 | 2.023623  | 1.789048  |
| H | -4.588654 | 1.053649  | 3.188703  |
| H | -4.444913 | 0.296372  | 1.603684  |
| H | -2.146821 | 2.817964  | 3.184992  |
| H | -1.027249 | 1.651968  | 3.909231  |
| H | -2.683623 | 1.762515  | 4.496076  |
| H | 0.436864  | 1.619306  | 1.480820  |
| H | 0.061195  | 0.258478  | 2.549884  |
| H | 7.095841  | 2.714686  | 0.410010  |
| H | 6.989534  | 4.462048  | 0.089306  |
| H | 6.166873  | 3.773297  | 1.508818  |

ωB97X energy = -1507.40966697 a.u.

(5S,1'S)-10a, Conf. I

|   |          |          |           |
|---|----------|----------|-----------|
| C | 2.365435 | 1.294432 | -0.476746 |
| C | 3.221405 | 2.384967 | -0.563083 |
| C | 4.292283 | 2.487859 | 0.321377  |

|   |           |           |           |                                    |           |           |           |
|---|-----------|-----------|-----------|------------------------------------|-----------|-----------|-----------|
| C | 4.487914  | 1.499027  | 1.285056  | H                                  | -4.403235 | 2.730149  | -2.357003 |
| C | 3.623664  | 0.423814  | 1.358344  | H                                  | -1.315457 | 2.207020  | -0.317383 |
| C | 2.552601  | 0.303757  | 0.476353  | H                                  | -0.785113 | 3.870373  | -2.004409 |
| C | 1.643543  | -0.907121 | 0.541952  | H                                  | -1.057275 | 2.297186  | -2.768494 |
| C | 1.821080  | -1.861158 | -0.646268 | H                                  | -2.296451 | 3.555473  | -2.861635 |
| C | 3.220900  | -2.422478 | -0.693746 | H                                  | -2.047593 | 4.512112  | 0.100513  |
| C | 3.603564  | -3.435021 | 0.182752  | H                                  | -3.211846 | 3.394843  | 0.826973  |
| C | 4.897027  | -3.937269 | 0.162004  | H                                  | -3.595641 | 4.205242  | -0.692252 |
| C | 5.825633  | -3.432465 | -0.739302 | H                                  | -1.926632 | 1.557455  | 1.519393  |
| C | 5.452362  | -2.425132 | -1.618139 | H                                  | -2.754710 | -2.144337 | 1.990373  |
| C | 4.157716  | -1.923688 | -1.593371 | H                                  | -1.479961 | -1.848960 | 3.179748  |
| N | 0.245112  | -0.481717 | 0.677819  | H                                  | -3.162624 | -1.911842 | 3.685918  |
| C | -0.723119 | -0.592312 | -0.185292 | H                                  | -4.266748 | 1.315897  | 2.164730  |
| N | -1.872517 | -0.090127 | 0.218254  | H                                  | -4.770113 | -0.052277 | 3.161032  |
| C | -2.965160 | 0.165672  | -0.693046 | H                                  | -4.465541 | -0.282840 | 1.441042  |
| C | -3.802187 | -0.887805 | -1.085721 | H                                  | -2.430116 | 1.748477  | 3.855799  |
| C | -3.558519 | -2.339328 | -0.707788 | H                                  | -1.307767 | 0.460920  | 4.324013  |
| C | -4.762786 | -2.969561 | -0.005702 | H                                  | -3.007213 | 0.350968  | 4.768630  |
| C | -3.170640 | -3.154488 | -1.945838 | H                                  | 0.342914  | 1.184939  | 1.949976  |
| C | -4.880473 | -0.580836 | -1.910104 | H                                  | -0.035005 | -0.348078 | 2.749708  |
| C | -5.113353 | 0.714924  | -2.335743 | H                                  | 4.070918  | 5.044001  | -0.533206 |
| C | -4.238092 | 1.726253  | -1.981891 | H                                  | 5.838243  | 5.238622  | -0.471860 |
| C | -3.133751 | 1.471404  | -1.174785 | H                                  | 5.113347  | 4.130800  | -1.661245 |
| C | -2.146595 | 2.597426  | -0.906756 | ωB97X energy = -1507.40960794 a.u. |           |           |           |
| C | -1.537780 | 3.107633  | -2.215870 | (5S,1'S)-10a, Conf. J              |           |           |           |
| C | -2.789011 | 3.741292  | -0.119537 | C                                  | 3.157750  | 1.302312  | -0.936902 |
| C | -1.724669 | 0.487908  | 1.590156  | C                                  | 4.446778  | 0.829017  | -0.745743 |
| C | -2.666758 | -0.073583 | 2.679070  | C                                  | 5.039992  | 0.951589  | 0.509519  |
| C | -2.497242 | -1.578650 | 2.886738  | C                                  | 4.331742  | 1.552971  | 1.547102  |
| C | -4.124352 | 0.244384  | 2.331652  | C                                  | 3.044434  | 2.015014  | 1.339237  |
| C | -2.323136 | 0.667337  | 3.978970  | C                                  | 2.433872  | 1.893731  | 0.093065  |
| C | -0.217666 | 0.253839  | 1.860167  | C                                  | 1.008688  | 2.343480  | -0.182569 |
| C | 5.030460  | 4.532801  | -0.647959 | C                                  | 0.381347  | 3.212977  | 0.912380  |
| O | 5.185203  | 3.507927  | 0.323767  | C                                  | -1.028637 | 3.637516  | 0.585166  |
| H | 1.536580  | 1.234730  | -1.177049 | C                                  | -2.114629 | 3.051598  | 1.228383  |
| H | 3.043127  | 3.138628  | -1.318142 | C                                  | -3.414957 | 3.414896  | 0.899548  |
| H | 5.321520  | 1.592625  | 1.970860  | C                                  | -3.643148 | 4.369449  | -0.080909 |
| H | 3.786718  | -0.338210 | 2.113786  | C                                  | -2.565072 | 4.964735  | -0.725522 |
| H | 1.871829  | -1.459864 | 1.457697  | C                                  | -1.268377 | 4.601986  | -0.392528 |
| H | 1.100928  | -2.679223 | -0.555257 | N                                  | 0.164927  | 1.164105  | -0.466633 |
| H | 1.614512  | -1.333396 | -1.581121 | C                                  | 0.077399  | 0.102314  | 0.280226  |
| H | 2.880921  | -3.839488 | 0.885436  | N                                  | -0.754949 | -0.816493 | -0.168159 |
| H | 5.179575  | -4.727179 | 0.848671  | C                                  | -0.717668 | -2.168449 | 0.345688  |
| H | 6.835268  | -3.826559 | -0.758604 | C                                  | -1.542759 | -2.513635 | 1.423578  |
| H | 6.170220  | -2.028709 | -2.327254 | C                                  | -2.399250 | -1.507372 | 2.172727  |
| H | 3.871398  | -1.135647 | -2.282756 | C                                  | -3.870620 | -1.922515 | 2.224456  |
| H | -0.605925 | -1.044239 | -1.161444 | C                                  | -1.850129 | -1.285005 | 3.585396  |
| H | -2.716283 | -2.380015 | -0.016489 | C                                  | -1.524448 | -3.837718 | 1.851480  |
| H | -4.527934 | -3.994686 | 0.288933  | C                                  | -0.709153 | -4.776279 | 1.243777  |
| H | -5.045001 | -2.416166 | 0.892579  | C                                  | 0.140975  | -4.395489 | 0.220458  |
| H | -5.632265 | -3.005271 | -0.666030 | C                                  | 0.172308  | -3.081675 | -0.236600 |
| H | -2.936906 | -4.182995 | -1.662782 | C                                  | 1.201467  | -2.694962 | -1.288216 |
| H | -2.298464 | -2.732170 | -2.450701 | C                                  | 2.621861  | -2.907647 | -0.755962 |
| H | -3.991103 | -3.181941 | -2.667110 | C                                  | 0.988158  | -3.449178 | -2.601661 |
| H | -5.549333 | -1.373074 | -2.227151 |                                    |           |           |           |
| H | -5.967355 | 0.933202  | -2.966495 |                                    |           |           |           |

|   |           |           |           |
|---|-----------|-----------|-----------|
| C | -1.241164 | -0.415118 | -1.528677 |
| C | -2.734011 | -0.618404 | -1.863354 |
| C | -3.672984 | 0.160744  | -0.942746 |
| C | -3.090245 | -2.108321 | -1.830324 |
| C | -2.916105 | -0.119733 | -3.304579 |
| C | -0.759648 | 1.053151  | -1.601120 |
| C | 7.045752  | -0.102465 | -0.219486 |
| O | 6.289780  | 0.522528  | 0.808575  |
| H | 2.708997  | 1.200775  | -1.920513 |
| H | 4.973065  | 0.375374  | -1.574894 |
| H | 4.805113  | 1.649221  | 2.516913  |
| H | 2.524398  | 2.476728  | 2.169869  |
| H | 1.001874  | 2.908463  | -1.117487 |
| H | 0.384580  | 2.666589  | 1.858856  |
| H | 1.019793  | 4.089887  | 1.043025  |
| H | -1.943823 | 2.305374  | 1.999217  |
| H | -4.250227 | 2.948109  | 1.409418  |
| H | -4.656832 | 4.653444  | -0.339087 |
| H | -2.735572 | 5.717672  | -1.486601 |
| H | -0.431229 | 5.077090  | -0.895231 |
| H | 0.659333  | -0.033443 | 1.184872  |
| H | -2.337959 | -0.551294 | 1.651236  |
| H | -4.462174 | -1.141292 | 2.707051  |
| H | -4.280772 | -2.089241 | 1.225896  |
| H | -4.003577 | -2.841776 | 2.799524  |
| H | -2.441713 | -0.527253 | 4.104091  |
| H | -0.810638 | -0.949768 | 3.563251  |
| H | -1.893482 | -2.206081 | 4.172011  |
| H | -2.156188 | -4.137401 | 2.680097  |
| H | -0.718133 | -5.804609 | 1.586384  |
| H | 0.808948  | -5.128268 | -0.218483 |
| H | 1.111061  | -1.628565 | -1.500382 |
| H | 3.352402  | -2.560108 | -1.490290 |
| H | 2.783492  | -2.355308 | 0.172940  |
| H | 2.818384  | -3.964392 | -0.560527 |
| H | 1.713570  | -3.119284 | -3.348125 |
| H | -0.014245 | -3.283336 | -3.004342 |
| H | 1.117540  | -4.524950 | -2.461666 |
| H | -0.677382 | -1.017120 | -2.247254 |
| H | -3.541359 | -0.112208 | 0.104295  |
| H | -3.540185 | 1.241150  | -1.026942 |
| H | -4.707840 | -0.059941 | -1.213661 |
| H | -2.410909 | -2.693085 | -2.457280 |
| H | -4.102007 | -2.247442 | -2.217267 |
| H | -3.059755 | -2.522957 | -0.822322 |
| H | -2.263895 | -0.659301 | -3.996764 |
| H | -2.710525 | 0.949131  | -3.400789 |
| H | -3.948382 | -0.284793 | -3.619091 |
| H | -0.239733 | 1.275805  | -2.531615 |
| H | -1.573565 | 1.768272  | -1.468906 |
| H | 6.547109  | -1.004963 | -0.583218 |
| H | 7.219428  | 0.582644  | -1.053456 |
| H | 7.997803  | -0.372151 | 0.230450  |

ωB97X energy = -1507.40943414 a.u.

(5S,1'S)-10a, Conf. K

|   |           |           |           |
|---|-----------|-----------|-----------|
| C | -2.181267 | 0.990379  | 0.909552  |
| C | -2.640945 | 2.282007  | 1.045411  |
| C | -3.169841 | 2.958561  | -0.058391 |
| C | -3.224655 | 2.322958  | -1.292672 |
| C | -2.746319 | 1.020886  | -1.413067 |
| C | -2.224054 | 0.339385  | -0.327283 |
| C | -1.725938 | -1.078823 | -0.480424 |
| C | -2.461344 | -2.074756 | 0.430793  |
| C | -3.944622 | -2.084362 | 0.155819  |
| C | -4.446596 | -2.733060 | -0.970222 |
| C | -5.806648 | -2.722700 | -1.246943 |
| C | -6.685229 | -2.063735 | -0.396717 |
| C | -6.195374 | -1.419089 | 0.730787  |
| C | -4.833744 | -1.429207 | 1.002705  |
| N | -0.271739 | -1.143473 | -0.220585 |
| C | 0.560312  | -0.141877 | -0.304400 |
| N | 1.822413  | -0.462417 | -0.127494 |
| C | 2.899673  | 0.484551  | -0.286675 |
| C | 3.030544  | 1.540871  | 0.628148  |
| C | 2.041766  | 1.825930  | 1.748887  |
| C | 2.720176  | 1.881933  | 3.119368  |
| C | 1.274807  | 3.123622  | 1.474323  |
| C | 4.114926  | 2.398288  | 0.471368  |
| C | 5.034410  | 2.217327  | -0.546143 |
| C | 4.856167  | 1.196733  | -1.462699 |
| C | 3.774201  | 0.326529  | -1.370706 |
| C | 3.568777  | -0.706340 | -2.467762 |
| C | 3.451410  | -0.032017 | -3.837578 |
| C | 4.681390  | -1.756824 | -2.476047 |
| C | 1.942704  | -1.927629 | 0.146634  |
| C | 2.502598  | -2.323288 | 1.534605  |
| C | 3.920572  | -1.774068 | 1.721361  |
| C | 2.591485  | -3.855768 | 1.548707  |
| C | 1.612107  | -1.851865 | 2.685274  |
| C | 0.489097  | -2.397179 | -0.112574 |
| C | -4.135878 | 4.955786  | -0.918470 |
| O | -3.599233 | 4.221546  | 0.173514  |
| H | -1.776483 | 0.483995  | 1.780898  |
| H | -2.604199 | 2.790076  | 2.001765  |
| H | -3.629559 | 2.820159  | -2.163741 |
| H | -2.790436 | 0.534471  | -2.382048 |
| H | -1.876037 | -1.390902 | -1.518725 |
| H | -2.062403 | -3.077026 | 0.260593  |
| H | -2.272006 | -1.819459 | 1.476394  |
| H | -3.767620 | -3.259632 | -1.634496 |
| H | -6.181955 | -3.234044 | -2.126191 |
| H | -7.748071 | -2.056723 | -0.609837 |
| H | -6.874551 | -0.905835 | 1.402131  |
| H | -4.456971 | -0.922103 | 1.885274  |
| H | 0.241720  | 0.871064  | -0.511935 |
| H | 1.307424  | 1.020997  | 1.788510  |
| H | 1.969627  | 2.022938  | 3.900117  |
| H | 3.266830  | 0.961837  | 3.337625  |
| H | 3.424333  | 2.714363  | 3.181256  |
| H | 0.526115  | 3.290909  | 2.251979  |

|   |           |           |           |
|---|-----------|-----------|-----------|
| H | 0.760411  | 3.096662  | 0.510226  |
| H | 1.951571  | 3.981447  | 1.465628  |
| H | 4.243570  | 3.222535  | 1.163770  |
| H | 5.880584  | 2.888359  | -0.637864 |
| H | 5.560137  | 1.086013  | -2.279913 |
| H | 2.618653  | -1.213744 | -2.295896 |
| H | 3.217273  | -0.777666 | -4.600340 |
| H | 2.660793  | 0.720922  | -3.840896 |
| H | 4.385841  | 0.455542  | -4.124361 |
| H | 4.489971  | -2.506306 | -3.246842 |
| H | 4.765302  | -2.271492 | -1.515656 |
| H | 5.648829  | -1.295308 | -2.688681 |
| H | 2.610684  | -2.354995 | -0.600854 |
| H | 4.571534  | -2.059153 | 0.890284  |
| H | 3.940852  | -0.688036 | 1.808398  |
| H | 4.350235  | -2.187961 | 2.636158  |
| H | 1.616713  | -4.336182 | 1.440680  |
| H | 3.014840  | -4.186176 | 2.499080  |
| H | 3.241358  | -4.218876 | 0.747907  |
| H | 0.607360  | -2.278414 | 2.638768  |
| H | 1.520097  | -0.765039 | 2.711730  |
| H | 2.050975  | -2.163992 | 3.635241  |
| H | 0.390236  | -2.955744 | -1.045098 |
| H | 0.104714  | -3.005841 | 0.701540  |
| H | -5.024212 | 4.465639  | -1.325364 |
| H | -4.410698 | 5.928663  | -0.519092 |
| H | -3.392262 | 5.083981  | -1.709512 |

ωB97X energy = -1507.40916792 a.u.

(5*S*,1'*S*)-**10a**, Conf. L

|   |           |           |           |
|---|-----------|-----------|-----------|
| C | -3.156419 | 0.764860  | 0.958622  |
| C | -3.883628 | 1.949887  | 0.924690  |
| C | -3.941821 | 2.685585  | -0.254339 |
| C | -3.270484 | 2.224157  | -1.388085 |
| C | -2.552250 | 1.047863  | -1.333882 |
| C | -2.481075 | 0.296555  | -0.159146 |
| C | -1.625689 | -0.955276 | -0.136596 |
| C | -2.172818 | -2.122912 | 0.694272  |
| C | -3.458148 | -2.669242 | 0.120929  |
| C | -3.439610 | -3.384822 | -1.075290 |
| C | -4.612485 | -3.883234 | -1.622798 |
| C | -5.825416 | -3.675720 | -0.977939 |
| C | -5.854364 | -2.970422 | 0.216496  |
| C | -4.677671 | -2.470756 | 0.760289  |
| N | -0.263194 | -0.615489 | 0.306816  |
| C | 0.810292  | -0.665834 | -0.428555 |
| N | 1.887368  | -0.176448 | 0.148658  |
| C | 3.215712  | -0.333216 | -0.394941 |
| C | 3.579703  | 0.376921  | -1.548962 |
| C | 2.622042  | 1.246072  | -2.349128 |
| C | 3.137515  | 2.676967  | -2.516038 |
| C | 2.337027  | 0.613345  | -3.714848 |
| C | 4.887363  | 0.239768  | -2.004441 |
| C | 5.798049  | -0.566468 | -1.345650 |
| C | 5.400695  | -1.292546 | -0.237498 |

|   |           |           |           |
|---|-----------|-----------|-----------|
| C | 4.098580  | -1.213185 | 0.246741  |
| C | 3.694194  | -2.111717 | 1.405509  |
| C | 3.924316  | -3.585582 | 1.059987  |
| C | 4.429896  | -1.737612 | 2.694459  |
| C | 1.534251  | 0.375249  | 1.494751  |
| C | 1.718342  | 1.900920  | 1.672579  |
| C | 1.330978  | 2.225468  | 3.122148  |
| C | 0.842211  | 2.713633  | 0.717511  |
| C | 3.189452  | 2.284662  | 1.485906  |
| C | 0.072898  | -0.111915 | 1.643916  |
| C | -5.316850 | 4.359061  | 0.731121  |
| O | -4.622068 | 3.848102  | -0.398209 |
| H | -3.132840 | 0.211852  | 1.891276  |
| H | -4.396428 | 2.279622  | 1.818093  |
| H | -3.328856 | 2.801483  | -2.303106 |
| H | -2.035675 | 0.702588  | -2.224316 |
| H | -1.509662 | -1.299723 | -1.166391 |
| H | -1.411207 | -2.906812 | 0.702132  |
| H | -2.326514 | -1.819666 | 1.732013  |
| H | -2.495021 | -3.563742 | -1.580719 |
| H | -4.579201 | -4.439270 | -2.552918 |
| H | -6.742477 | -4.066762 | -1.403421 |
| H | -6.795664 | -2.808441 | 0.729373  |
| H | -4.710256 | -1.924520 | 1.697429  |
| H | 0.821775  | -1.084419 | -1.427557 |
| H | 1.672159  | 1.305889  | -1.817318 |
| H | 2.397544  | 3.278943  | -3.047785 |
| H | 3.330377  | 3.153028  | -1.552257 |
| H | 4.063346  | 2.701397  | -3.094993 |
| H | 1.612193  | 1.216286  | -4.265910 |
| H | 1.934636  | -0.397789 | -3.616580 |
| H | 3.248552  | 0.551328  | -4.314180 |
| H | 5.198757  | 0.777037  | -2.893066 |
| H | 6.815456  | -0.646088 | -1.710734 |
| H | 6.110204  | -1.951453 | 0.250240  |
| H | 2.622617  | -2.001755 | 1.578471  |
| H | 3.558779  | -4.219956 | 1.870264  |
| H | 3.398715  | -3.863293 | 0.144095  |
| H | 4.985839  | -3.801640 | 0.920668  |
| H | 4.088977  | -2.364246 | 3.521226  |
| H | 4.266871  | -0.692439 | 2.969327  |
| H | 5.506703  | -1.885704 | 2.582418  |
| H | 2.166680  | -0.114119 | 2.234663  |
| H | 0.277859  | 2.024880  | 3.330737  |
| H | 1.935877  | 1.652234  | 3.829871  |
| H | 1.504740  | 3.285899  | 3.313921  |
| H | 1.097492  | 2.531042  | -0.327424 |
| H | 0.990149  | 3.778851  | 0.906713  |
| H | -0.224099 | 2.507491  | 0.847816  |
| H | 3.532008  | 2.139223  | 0.461899  |
| H | 3.838081  | 1.700295  | 2.144628  |
| H | 3.325227  | 3.339404  | 1.734676  |
| H | -0.024768 | -0.918620 | 2.371336  |
| H | -0.609023 | 0.690433  | 1.917478  |
| H | -4.628389 | 4.573685  | 1.552793  |
| H | -5.786319 | 5.282578  | 0.402040  |

H -6.086612 3.660666 1.069687  
 $\omega$ B97X energy = -1507.40911284 a.u.

(5S,1'S)-**10a**, Conf. M

|   |           |           |           |
|---|-----------|-----------|-----------|
| C | -2.563033 | 1.176638  | -1.047048 |
| C | -3.231906 | 2.390573  | -0.945698 |
| C | -3.828649 | 2.741947  | 0.260804  |
| C | -3.751767 | 1.868697  | 1.346806  |
| C | -3.084869 | 0.666127  | 1.225827  |
| C | -2.474276 | 0.299959  | 0.024706  |
| C | -1.669403 | -0.976420 | -0.127315 |
| C | -2.237505 | -2.209922 | 0.584564  |
| C | -3.553292 | -2.646515 | -0.012427 |
| C | -4.757369 | -2.427110 | 0.649148  |
| C | -5.961614 | -2.822044 | 0.080280  |
| C | -5.975709 | -3.442482 | -1.160717 |
| C | -4.778696 | -3.669094 | -1.828511 |
| C | -3.578342 | -3.274389 | -1.256539 |
| N | -0.281716 | -0.741796 | 0.306504  |
| C | 0.749438  | -0.630894 | -0.480782 |
| N | 1.855081  | -0.246502 | 0.120695  |
| C | 3.149994  | -0.277606 | -0.517957 |
| C | 4.060636  | -1.270271 | -0.129703 |
| C | 3.712158  | -2.398483 | 0.828336  |
| C | 3.911698  | -3.763111 | 0.163187  |
| C | 4.516406  | -2.307439 | 2.127244  |
| C | 5.333091  | -1.237306 | -0.691267 |
| C | 5.672580  | -0.289640 | -1.639919 |
| C | 4.731961  | 0.633482  | -2.060373 |
| C | 3.453098  | 0.664202  | -1.512673 |
| C | 2.457861  | 1.681512  | -2.048323 |
| C | 2.973443  | 3.116663  | -1.920285 |
| C | 2.094724  | 1.367880  | -3.503017 |
| C | 1.582934  | 0.008128  | 1.570448  |
| C | 1.818860  | 1.453389  | 2.068993  |
| C | 1.497182  | 1.454844  | 3.570228  |
| C | 0.929505  | 2.473156  | 1.355310  |
| C | 3.291729  | 1.841579  | 1.906547  |
| C | 0.116081  | -0.474209 | 1.693319  |
| C | -4.611288 | 4.816681  | -0.603326 |
| O | -4.504539 | 3.896313  | 0.473888  |
| H | -2.101093 | 0.915797  | -1.994518 |
| H | -3.280427 | 3.042645  | -1.807383 |
| H | -4.226185 | 2.150246  | 2.279306  |
| H | -3.049896 | 0.008429  | 2.087429  |
| H | -1.598172 | -1.204504 | -1.193035 |
| H | -1.504052 | -3.014479 | 0.488071  |
| H | -2.358071 | -2.016528 | 1.652511  |
| H | -4.756057 | -1.945745 | 1.621776  |
| H | -6.890844 | -2.645454 | 0.610076  |
| H | -6.914555 | -3.752258 | -1.605198 |
| H | -4.779768 | -4.159789 | -2.795225 |
| H | -2.645831 | -3.464923 | -1.779874 |
| H | 0.705645  | -0.845016 | -1.541973 |
| H | 2.651783  | -2.331631 | 1.076003  |

|   |           |           |           |
|---|-----------|-----------|-----------|
| H | 3.576118  | -4.556219 | 0.834728  |
| H | 3.343324  | -3.837273 | -0.766088 |
| H | 4.963902  | -3.945084 | -0.066727 |
| H | 4.211212  | -3.095784 | 2.818464  |
| H | 4.379336  | -1.345108 | 2.626978  |
| H | 5.584620  | -2.428050 | 1.930954  |
| H | 6.064222  | -1.981344 | -0.395671 |
| H | 6.667377  | -0.283854 | -2.070109 |
| H | 4.996684  | 1.349795  | -2.829854 |
| H | 1.538600  | 1.614179  | -1.465728 |
| H | 2.207104  | 3.819361  | -2.254517 |
| H | 3.231133  | 3.363544  | -0.888109 |
| H | 3.861387  | 3.276128  | -2.535952 |
| H | 1.343944  | 2.074293  | -3.863583 |
| H | 1.691739  | 0.358038  | -3.611775 |
| H | 2.970924  | 1.448090  | -4.150983 |
| H | 2.235434  | -0.642702 | 2.151994  |
| H | 0.449126  | 1.226723  | 3.775621  |
| H | 2.116270  | 0.731055  | 4.107123  |
| H | 1.702296  | 2.443571  | 3.984829  |
| H | 1.151430  | 2.533074  | 0.289027  |
| H | 1.101069  | 3.464391  | 1.780073  |
| H | -0.136183 | 2.254347  | 1.468739  |
| H | 3.590438  | 1.919163  | 0.861420  |
| H | 3.949260  | 1.115516  | 2.393067  |
| H | 3.465131  | 2.813014  | 2.374560  |
| H | 0.025661  | -1.387697 | 2.281499  |
| H | -0.537448 | 0.284175  | 2.120766  |
| H | -5.181290 | 5.660039  | -0.222006 |
| H | -3.625514 | 5.161238  | -0.926974 |
| H | -5.140986 | 4.373035  | -1.450436 |

$\omega$ B97X energy = -1507.40898799 a.u.

(5S,1'S)-**10a**, Conf. N

|   |           |           |           |
|---|-----------|-----------|-----------|
| C | -2.668131 | 0.942310  | -1.715328 |
| C | -3.090057 | 2.256318  | -1.775223 |
| C | -3.079888 | 3.047233  | -0.626582 |
| C | -2.648204 | 2.502206  | 0.580877  |
| C | -2.236889 | 1.177100  | 0.623488  |
| C | -2.235377 | 0.381155  | -0.515775 |
| C | -1.777610 | -1.058503 | -0.472581 |
| C | -2.522731 | -1.898773 | 0.577218  |
| C | -4.001488 | -1.967622 | 0.285511  |
| C | -4.908851 | -1.164820 | 0.970719  |
| C | -6.265981 | -1.223580 | 0.682475  |
| C | -6.733129 | -2.086695 | -0.299249 |
| C | -5.836178 | -2.892165 | -0.988703 |
| C | -4.480810 | -2.832235 | -0.696143 |
| N | -0.320121 | -1.136799 | -0.236076 |
| C | 0.528184  | -0.147015 | -0.281484 |
| N | 1.784544  | -0.494879 | -0.112712 |
| C | 2.875727  | 0.441488  | -0.233142 |
| C | 3.749937  | 0.315593  | -1.321439 |
| C | 3.531678  | -0.667692 | -2.460571 |
| C | 3.422106  | 0.065062  | -3.800763 |

|   |           |           |           |
|---|-----------|-----------|-----------|
| C | 4.631536  | -1.730277 | -2.514958 |
| C | 4.844336  | 1.173188  | -1.376044 |
| C | 5.034923  | 2.153149  | -0.418482 |
| C | 4.115625  | 2.306041  | 0.603933  |
| C | 3.018950  | 1.458321  | 0.723539  |
| C | 2.029218  | 1.710408  | 1.851331  |
| C | 2.703503  | 1.702699  | 3.224918  |
| C | 1.277847  | 3.026465  | 1.625366  |
| C | 1.882470  | -1.970924 | 0.102942  |
| C | 2.444547  | -2.433464 | 1.468888  |
| C | 1.574318  | -1.988856 | 2.645233  |
| C | 3.876214  | -1.924382 | 1.665004  |
| C | 2.499022  | -3.967002 | 1.420441  |
| C | 0.419482  | -2.405894 | -0.163829 |
| C | -3.505342 | 5.170397  | 0.362683  |
| O | -3.502370 | 4.324381  | -0.779316 |
| H | -2.677544 | 0.340555  | -2.618220 |
| H | -3.430630 | 2.691345  | -2.707181 |
| H | -2.630471 | 3.090696  | 1.488338  |
| H | -1.903404 | 0.772232  | 1.574435  |
| H | -1.951968 | -1.506643 | -1.455932 |
| H | -2.118062 | -2.912866 | 0.578783  |
| H | -2.347969 | -1.477571 | 1.569944  |
| H | -4.550495 | -0.486886 | 1.738800  |
| H | -6.959605 | -0.594397 | 1.228775  |
| H | -7.792699 | -2.135491 | -0.522888 |
| H | -6.193129 | -3.574239 | -1.752074 |
| H | -3.787350 | -3.473584 | -1.232226 |
| H | 0.229410  | 0.878313  | -0.453675 |
| H | 2.575817  | -1.170695 | -2.309259 |
| H | 3.181562  | -0.645836 | -4.594111 |
| H | 2.638718  | 0.825032  | -3.773112 |
| H | 4.361484  | 0.555233  | -4.066137 |
| H | 4.429116  | -2.444904 | -3.315418 |
| H | 4.711023  | -2.284993 | -1.576726 |
| H | 5.604055  | -1.272059 | -2.710890 |
| H | 5.548520  | 1.086147  | -2.195938 |
| H | 5.890797  | 2.815133  | -0.481444 |
| H | 4.254121  | 3.100068  | 1.328974  |
| H | 1.285497  | 0.913053  | 1.856086  |
| H | 1.952134  | 1.818724  | 4.009004  |
| H | 3.239762  | 0.768404  | 3.405594  |
| H | 3.416321  | 2.524190  | 3.323665  |
| H | 0.530708  | 3.173610  | 2.408643  |
| H | 0.764084  | 3.041160  | 0.660408  |
| H | 1.964374  | 3.876185  | 1.648509  |
| H | 2.537885  | -2.378800 | -0.666387 |
| H | 1.518371  | -0.902204 | 2.723262  |
| H | 0.555751  | -2.379496 | 2.584086  |
| H | 2.006248  | -2.360263 | 3.576892  |
| H | 4.514894  | -2.196474 | 0.820159  |
| H | 4.301353  | -2.379750 | 2.562027  |
| H | 3.923522  | -0.842709 | 1.789320  |
| H | 3.128570  | -4.311854 | 0.595646  |
| H | 1.512293  | -4.421345 | 1.308423  |
| H | 2.928523  | -4.344867 | 2.350120  |

|   |           |           |           |
|---|-----------|-----------|-----------|
| H | 0.306438  | -2.937602 | -1.110160 |
| H | 0.027138  | -3.029685 | 0.634727  |
| H | -2.497888 | 5.285910  | 0.771441  |
| H | -3.869099 | 6.135437  | 0.019184  |
| H | -4.173917 | 4.785072  | 1.136953  |

ωB97X energy = -1507.40889045 a.u.

(5*S*,1'*R*)-**10b**, Conf. A

|   |           |           |           |
|---|-----------|-----------|-----------|
| C | -4.278331 | 1.233946  | 0.089034  |
| C | -5.508795 | 0.589089  | 0.194640  |
| C | -5.683060 | -0.657085 | -0.391778 |
| C | -4.622159 | -1.246441 | -1.085938 |
| C | -3.414545 | -0.592247 | -1.184030 |
| C | -3.219492 | 0.661438  | -0.594993 |
| C | -1.862401 | 1.329061  | -0.735519 |
| C | -1.780747 | 2.758404  | -0.186194 |
| C | -0.407404 | 3.365565  | -0.335691 |
| C | 0.140096  | 3.599618  | -1.597394 |
| C | 1.410916  | 4.138629  | -1.728910 |
| C | 2.157194  | 4.453534  | -0.599085 |
| C | 1.621162  | 4.229821  | 0.659757  |
| C | 0.346517  | 3.690282  | 0.786864  |
| N | -0.834644 | 0.477715  | -0.120984 |
| C | 0.269297  | 0.090407  | -0.694201 |
| N | 1.078862  | -0.593992 | 0.085805  |
| C | 2.199216  | -1.345100 | -0.432685 |
| C | 3.416011  | -0.689468 | -0.662648 |
| C | 3.595888  | 0.815136  | -0.545574 |
| C | 4.713183  | 1.193768  | 0.428482  |
| C | 3.858911  | 1.423578  | -1.926503 |
| C | 4.498163  | -1.465029 | -1.068536 |
| C | 4.373948  | -2.830888 | -1.250799 |
| C | 3.143965  | -3.441943 | -1.081868 |
| C | 2.025350  | -2.711230 | -0.694094 |
| C | 0.676085  | -3.411628 | -0.634209 |
| C | 0.306485  | -3.985421 | -2.005323 |
| C | 0.641003  | -4.502584 | 0.437640  |
| C | 0.429921  | -0.808308 | 1.418257  |
| C | 1.276376  | -0.528175 | 2.680043  |
| C | 2.491784  | -1.460577 | 2.733477  |
| C | 0.375175  | -0.857538 | 3.878609  |
| C | 1.741679  | 0.924956  | 2.779401  |
| C | -0.838857 | 0.070293  | 1.287866  |
| C | -7.944206 | -0.809224 | 0.333606  |
| O | -6.832670 | -1.372922 | -0.348492 |
| H | -4.173518 | 2.204710  | 0.557975  |
| H | -6.311285 | 1.072438  | 0.735281  |
| H | -4.771148 | -2.216997 | -1.544025 |
| H | -2.602238 | -1.064205 | -1.729148 |
| H | -1.606569 | 1.357827  | -1.797876 |
| H | -2.518228 | 3.356076  | -0.727324 |
| H | -2.071585 | 2.773300  | 0.866716  |
| H | -0.436333 | 3.369352  | -2.488611 |
| H | 1.821036  | 4.315800  | -2.716765 |

|                                            |           |           |           |   |           |           |           |
|--------------------------------------------|-----------|-----------|-----------|---|-----------|-----------|-----------|
| H                                          | 3.150194  | 4.876357  | -0.702512 | N | 1.095464  | -0.639275 | 0.098091  |
| H                                          | 2.191938  | 4.476911  | 1.547962  | C | 2.265438  | -1.286603 | -0.450887 |
| H                                          | -0.071953 | 3.531312  | 1.775883  | C | 3.466958  | -0.572006 | -0.551776 |
| H                                          | 0.494654  | 0.294937  | -1.734275 | C | 3.597918  | 0.911631  | -0.246946 |
| H                                          | 2.668155  | 1.252649  | -0.171017 | C | 4.637514  | 1.189617  | 0.840913  |
| H                                          | 4.744225  | 2.278960  | 0.553763  | C | 3.939299  | 1.688272  | -1.522449 |
| H                                          | 4.564941  | 0.743078  | 1.412270  | C | 4.590153  | -1.261501 | -0.999640 |
| H                                          | 5.689218  | 0.874432  | 0.055564  | C | 4.522890  | -2.599707 | -1.343813 |
| H                                          | 3.960197  | 2.507623  | -1.845852 | C | 3.310600  | -3.264447 | -1.295434 |
| H                                          | 3.043174  | 1.209833  | -2.621493 | C | 2.153006  | -2.619206 | -0.872558 |
| H                                          | 4.781417  | 1.027884  | -2.358717 | C | 0.831386  | -3.369053 | -0.944102 |
| H                                          | 5.455829  | -0.989119 | -1.246787 | C | 0.528104  | -3.791696 | -2.384477 |
| H                                          | 5.233983  | -3.417811 | -1.552057 | C | 0.809337  | -4.578729 | -0.007452 |
| H                                          | 3.045369  | -4.504613 | -1.273334 | C | 0.393346  | -1.038724 | 1.358173  |
| H                                          | -0.093745 | -2.676650 | -0.392929 | C | 1.149810  | -0.814157 | 2.686402  |
| H                                          | -0.692171 | -4.425907 | -1.968403 | C | 2.429381  | -1.656493 | 2.724013  |
| H                                          | 0.310344  | -3.208618 | -2.772813 | C | 0.223010  | -1.317087 | 3.802172  |
| H                                          | 1.005716  | -4.766982 | -2.311049 | C | 1.488949  | 0.655975  | 2.932056  |
| H                                          | -0.347203 | -4.965683 | 0.473314  | C | -0.937479 | -0.253235 | 1.236868  |
| H                                          | 0.864500  | -4.105272 | 1.430747  | C | -7.874939 | -0.962837 | 0.437729  |
| H                                          | 1.371057  | -5.286141 | 0.221133  | O | -6.854525 | -1.326910 | -0.481518 |
| H                                          | 0.140927  | -1.860814 | 1.463581  | H | -2.760087 | -0.693737 | -2.137935 |
| H                                          | 2.201260  | -2.505722 | 2.596981  | H | -4.943786 | -1.837182 | -2.055603 |
| H                                          | 3.238192  | -1.216448 | 1.977349  | H | -6.148757 | 0.727173  | 1.163543  |
| H                                          | 2.969053  | -1.372417 | 3.711753  | H | -3.997600 | 1.851053  | 1.081861  |
| H                                          | -0.513456 | -0.222445 | 3.915466  | H | -1.594884 | 1.439694  | -1.667185 |
| H                                          | 0.929084  | -0.700632 | 4.806144  | H | -2.579744 | 3.308669  | -0.332074 |
| H                                          | 0.049706  | -1.901175 | 3.853461  | H | -1.896927 | 2.619452  | 1.131146  |
| H                                          | 0.913628  | 1.616796  | 2.944903  | H | -0.865821 | 3.703586  | -2.318115 |
| H                                          | 2.276505  | 1.248298  | 1.885205  | H | 1.270028  | 4.827665  | -2.795032 |
| H                                          | 2.420408  | 1.029287  | 3.628613  | H | 2.922366  | 5.185488  | -0.983349 |
| H                                          | -1.754107 | -0.474038 | 1.515998  | H | 2.415781  | 4.400641  | 1.310858  |
| H                                          | -0.790696 | 0.959246  | 1.919047  | H | 0.272163  | 3.285804  | 1.789988  |
| H                                          | -8.254150 | 0.131716  | -0.128703 | H | 0.595351  | 0.509552  | -1.598880 |
| H                                          | -8.748010 | -1.536148 | 0.248896  | H | 2.637320  | 1.287019  | 0.111332  |
| H                                          | -7.716455 | -0.641487 | 1.389647  | H | 4.653969  | 2.257219  | 1.073633  |
| $\omega$ B97X energy = -1507.41295679 a.u. |           |           |           | H | 4.419149  | 0.646342  | 1.762760  |
| (5S,1'R)-10b, Conf. B                      |           |           |           | H | 5.640055  | 0.905509  | 0.512345  |
| C                                          | -3.502300 | -0.381860 | -1.408858 | H | 3.998829  | 2.756750  | -1.306281 |
| C                                          | -4.718030 | -1.028514 | -1.370657 | H | 3.182798  | 1.542389  | -2.297414 |
| C                                          | -5.688328 | -0.638384 | -0.443391 | H | 4.902548  | 1.370573  | -1.928942 |
| C                                          | -5.417209 | 0.401955  | 0.436350  | H | 5.536473  | -0.738742 | -1.081282 |
| C                                          | -4.181856 | 1.042498  | 0.384229  | H | 5.414208  | -3.119631 | -1.675515 |
| C                                          | -3.212861 | 0.666883  | -0.531116 | H | 3.257505  | -4.300487 | -1.610767 |
| C                                          | -1.850047 | 1.326946  | -0.610913 | H | 0.025904  | -2.695608 | -0.647090 |
| C                                          | -1.752342 | 2.707175  | 0.051820  | H | -0.456162 | -4.262083 | -2.436339 |
| C                                          | -0.441493 | 3.399784  | -0.231047 | H | 0.532739  | -2.932122 | -3.058031 |
| C                                          | -0.143189 | 3.843903  | -1.519496 | H | 1.262395  | -4.513045 | -2.750163 |
| C                                          | 1.058293  | 4.481396  | -1.789762 | H | -0.164547 | -5.070769 | -0.048665 |
| C                                          | 1.984412  | 4.684045  | -0.773519 | H | 1.003530  | -4.295193 | 1.030086  |
| C                                          | 1.700318  | 4.244963  | 0.510910  | H | 1.566891  | -5.310350 | -0.298303 |
| C                                          | 0.493216  | 3.609464  | 0.777925  | H | 0.192467  | -2.109227 | 1.288263  |
| N                                          | -0.832719 | 0.414162  | -0.065671 | H | 2.219903  | -2.708029 | 2.508584  |
| C                                          | 0.314261  | 0.141416  | -0.619099 | H | 3.179072  | -1.310276 | 2.012739  |
|                                            |           |           |           | H | 2.868658  | -1.602333 | 3.722443  |
|                                            |           |           |           | H | -0.714756 | -0.758472 | 3.848548  |



|   |           |           |          |
|---|-----------|-----------|----------|
| H | 0.720136  | -1.203256 | 4.767398 |
| H | -0.015337 | -2.375881 | 3.669716 |
| H | 0.594985  | 1.268065  | 3.070298 |
| H | 2.071482  | 1.085143  | 2.115087 |
| H | 2.081234  | 0.744918  | 3.845191 |
| H | -1.810559 | -0.904490 | 1.246020 |
| H | -1.054000 | 0.492682  | 2.023343 |
| H | -8.190065 | 0.072989  | 0.286688 |
| H | -8.710795 | -1.628222 | 0.237012 |
| H | -7.542269 | -1.098283 | 1.470282 |

ωB97X energy = -1507.41278551 a.u.

(5*S*,1'*R*)-**10b**, Conf. C

|   |           |           |           |
|---|-----------|-----------|-----------|
| C | 3.680490  | -0.019068 | 1.275900  |
| C | 4.934376  | -0.602838 | 1.151138  |
| C | 5.740647  | -0.263194 | 0.068354  |
| C | 5.278037  | 0.657235  | -0.871783 |
| C | 4.028051  | 1.227708  | -0.731217 |
| C | 3.207018  | 0.898086  | 0.347329  |
| C | 1.817437  | 1.478292  | 0.524863  |
| C | 1.628974  | 2.883326  | -0.063338 |
| C | 0.272753  | 3.466683  | 0.245849  |
| C | -0.692822 | 3.592506  | -0.747616 |
| C | -1.949624 | 4.111492  | -0.460032 |
| C | -2.252649 | 4.517272  | 0.831148  |
| C | -1.295559 | 4.398323  | 1.831978  |
| C | -0.044135 | 3.875974  | 1.540975  |
| N | 0.814689  | 0.546287  | -0.015639 |
| C | -0.250429 | 0.133933  | 0.610499  |
| N | -1.038375 | -0.642728 | -0.103401 |
| C | -2.113812 | -1.408270 | 0.484569  |
| C | -3.349740 | -0.788806 | 0.713733  |
| C | -3.594445 | 0.698454  | 0.520560  |
| C | -4.753867 | 0.977321  | -0.437724 |
| C | -3.841436 | 1.372594  | 1.873612  |
| C | -4.388911 | -1.582174 | 1.191047  |
| C | -4.206350 | -2.930666 | 1.440030  |
| C | -2.958448 | -3.502864 | 1.266457  |
| C | -1.880124 | -2.751603 | 0.809841  |
| C | -0.507205 | -3.403171 | 0.744866  |
| C | -0.075082 | -3.888086 | 2.131912  |
| C | -0.461905 | -4.549796 | -0.267002 |
| C | -0.414763 | -0.900725 | -1.439423 |
| C | -1.304287 | -0.724363 | -2.690317 |
| C | -2.477692 | -1.710285 | -2.664022 |
| C | -0.420202 | -1.074937 | -3.895729 |
| C | -1.836946 | 0.700033  | -2.850504 |
| C | 0.816258  | 0.038490  | -1.391798 |
| C | 7.496848  | -1.700214 | 0.787217  |
| O | 6.978873  | -0.767396 | -0.151224 |
| H | 3.062648  | -0.289752 | 2.126874  |
| H | 5.266809  | -1.309127 | 1.899932  |
| H | 5.916113  | 0.915836  | -1.708413 |
| H | 3.700700  | 1.940908  | -1.479053 |
| H | 1.608265  | 1.528603  | 1.595829  |

|   |           |           |           |
|---|-----------|-----------|-----------|
| H | 2.416756  | 3.513120  | 0.356407  |
| H | 1.781071  | 2.867036  | -1.144550 |
| H | -0.456193 | 3.296379  | -1.764824 |
| H | -2.688426 | 4.203595  | -1.248534 |
| H | -3.228985 | 4.930586  | 1.057537  |
| H | -1.523469 | 4.719074  | 2.842196  |
| H | 0.700856  | 3.797714  | 2.327339  |
| H | -0.463128 | 0.389760  | 1.641832  |
| H | -2.697471 | 1.151305  | 0.093948  |
| H | -4.839716 | 2.052374  | -0.613976 |
| H | -4.610938 | 0.485992  | -1.402708 |
| H | -5.703425 | 0.632342  | -0.021859 |
| H | -3.978443 | 2.447231  | 1.737918  |
| H | -3.001750 | 1.221792  | 2.556548  |
| H | -4.739518 | 0.972906  | 2.351042  |
| H | -5.359429 | -1.133937 | 1.371387  |
| H | -5.034220 | -3.533192 | 1.795653  |
| H | -2.813443 | -4.549956 | 1.507651  |
| H | 0.225100  | -2.653718 | 0.440570  |
| H | 0.939477  | -4.289796 | 2.087252  |
| H | -0.089389 | -3.073091 | 2.858568  |
| H | -0.732193 | -4.680113 | 2.498198  |
| H | 0.542693  | -4.975431 | -0.311306 |
| H | -0.733632 | -4.218538 | -1.272235 |
| H | -1.151705 | -5.348056 | 0.017279  |
| H | -0.078836 | -1.940216 | -1.438271 |
| H | -2.136743 | -2.733513 | -2.484814 |
| H | -3.215235 | -1.461386 | -1.900867 |
| H | -2.982612 | -1.692846 | -3.632129 |
| H | 0.434071  | -0.400446 | -3.993019 |
| H | -1.005921 | -0.995802 | -4.813561 |
| H | -0.042354 | -2.098451 | -3.824407 |
| H | -1.045557 | 1.415844  | -3.080974 |
| H | -2.359175 | 1.047238  | -1.957731 |
| H | -2.544839 | 0.729609  | -3.681454 |
| H | 1.750398  | -0.482691 | -1.595034 |
| H | 0.723075  | 0.874552  | -2.086588 |
| H | 6.873327  | -2.596757 | 0.838215  |
| H | 8.486803  | -1.969104 | 0.427524  |
| H | 7.580660  | -1.253586 | 1.781461  |

ωB97X energy = -1507.41271148 a.u.

(5*S*,1'*R*)-**10b**, Conf. D

|   |           |           |           |
|---|-----------|-----------|-----------|
| C | 4.085465  | 1.577886  | 1.030961  |
| C | 5.344035  | 1.025501  | 0.893843  |
| C | 5.567133  | 0.018057  | -0.044494 |
| C | 4.515695  | -0.424747 | -0.842931 |
| C | 3.258209  | 0.146125  | -0.694375 |
| C | 3.024673  | 1.147573  | 0.236993  |
| C | 1.656367  | 1.784323  | 0.381869  |
| C | 1.306018  | 2.683391  | -0.807827 |
| C | -0.021044 | 3.403504  | -0.703462 |
| C | -0.356822 | 4.136156  | 0.434008  |
| C | -1.570871 | 4.802473  | 0.515406  |
| C | -2.469951 | 4.749893  | -0.542368 |

|   |           |           |           |
|---|-----------|-----------|-----------|
| C | -2.144280 | 4.029194  | -1.681752 |
| C | -0.928381 | 3.361299  | -1.758810 |
| N | 0.639156  | 0.755289  | 0.622105  |
| C | -0.289094 | 0.324368  | -0.181970 |
| N | -0.999738 | -0.676779 | 0.294082  |
| C | -2.249068 | -1.087579 | -0.304367 |
| C | -3.443516 | -0.650027 | 0.283845  |
| C | -3.495257 | 0.350114  | 1.428424  |
| C | -4.241683 | 1.618230  | 1.004461  |
| C | -4.116004 | -0.256780 | 2.688114  |
| C | -4.638450 | -1.119968 | -0.252689 |
| C | -4.647998 | -1.949780 | -1.359739 |
| C | -3.457004 | -2.303176 | -1.969303 |
| C | -2.233112 | -1.879636 | -1.460887 |
| C | -0.961337 | -2.240632 | -2.209613 |
| C | -0.813231 | -3.748083 | -2.421555 |
| C | -0.901105 | -1.496422 | -3.547373 |
| C | -0.512378 | -1.048525 | 1.658469  |
| C | -0.045190 | -2.509347 | 1.849873  |
| C | 0.397023  | -2.635670 | 3.314642  |
| C | 1.118773  | -2.884878 | 0.931953  |
| C | -1.215168 | -3.472669 | 1.627234  |
| C | 0.593039  | 0.012007  | 1.885951  |
| C | 7.105380  | -1.501741 | -1.041550 |
| O | 6.830174  | -0.469955 | -0.104446 |
| H | 3.924226  | 2.355972  | 1.770269  |
| H | 6.169444  | 1.357099  | 1.512493  |
| H | 4.658927  | -1.205955 | -1.577175 |
| H | 2.451459  | -0.215505 | -1.325689 |
| H | 1.662385  | 2.393246  | 1.289901  |
| H | 2.116732  | 3.412846  | -0.875641 |
| H | 1.350034  | 2.106665  | -1.736529 |
| H | 0.338347  | 4.199129  | 1.265114  |
| H | -1.814213 | 5.368025  | 1.407680  |
| H | -3.419202 | 5.268970  | -0.477258 |
| H | -2.836874 | 3.984098  | -2.514461 |
| H | -0.680653 | 2.805959  | -2.659221 |
| H | -0.487198 | 0.755439  | -1.153915 |
| H | -2.478289 | 0.663297  | 1.670039  |
| H | -4.215230 | 2.354333  | 1.811274  |
| H | -3.783459 | 2.069275  | 0.120560  |
| H | -5.289381 | 1.408149  | 0.777239  |
| H | -4.092546 | 0.465673  | 3.506501  |
| H | -3.584141 | -1.155617 | 3.010526  |
| H | -5.158912 | -0.532645 | 2.514738  |
| H | -5.578674 | -0.812095 | 0.191128  |
| H | -5.589218 | -2.303099 | -1.764819 |
| H | -3.477427 | -2.919454 | -2.861007 |
| H | -0.107307 | -1.909679 | -1.618442 |
| H | 0.145483  | -3.964128 | -2.897921 |
| H | -0.852300 | -4.294518 | -1.476618 |
| H | -1.600542 | -4.138726 | -3.070077 |
| H | 0.042921  | -1.706419 | -4.054759 |
| H | -0.981946 | -0.414719 | -3.411965 |
| H | -1.715371 | -1.810148 | -4.205305 |
| H | -1.333386 | -0.885178 | 2.357814  |

|   |           |           |           |
|---|-----------|-----------|-----------|
| H | 1.266279  | -2.015590 | 3.544610  |
| H | -0.411018 | -2.358063 | 3.996916  |
| H | 0.670211  | -3.671694 | 3.523016  |
| H | 0.835504  | -2.850009 | -0.120893 |
| H | 1.437756  | -3.906235 | 1.150082  |
| H | 1.989281  | -2.238107 | 1.069955  |
| H | -1.551663 | -3.486480 | 0.590494  |
| H | -2.070356 | -3.209255 | 2.256419  |
| H | -0.907560 | -4.487208 | 1.889845  |
| H | 0.358441  | 0.700614  | 2.698293  |
| H | 1.569022  | -0.433093 | 2.076894  |
| H | 6.919253  | -1.165975 | -2.065089 |
| H | 8.160064  | -1.737895 | -0.925166 |
| H | 6.508570  | -2.393843 | -0.833486 |

ωB97X energy = -1507.41077054 a.u.

(5*S*,1'*R*)-**10b**, Conf. E

|   |           |           |           |
|---|-----------|-----------|-----------|
| C | 3.174793  | 1.130147  | 1.234254  |
| C | 4.420027  | 0.550340  | 1.141889  |
| C | 5.083663  | 0.508661  | -0.088428 |
| C | 4.480916  | 1.061449  | -1.210308 |
| C | 3.219218  | 1.642560  | -1.098489 |
| C | 2.548293  | 1.684532  | 0.112235  |
| C | 1.153074  | 2.260018  | 0.270539  |
| C | 0.685143  | 3.158622  | -0.882617 |
| C | -0.716811 | 3.674731  | -0.676014 |
| C | -0.970418 | 4.687609  | 0.246718  |
| C | -2.268969 | 5.106304  | 0.499026  |
| C | -3.334685 | 4.515869  | -0.169245 |
| C | -3.091839 | 3.516657  | -1.101522 |
| C | -1.789758 | 3.103403  | -1.354794 |
| N | 0.185631  | 1.165989  | 0.499691  |
| C | 0.124887  | 0.055638  | -0.176086 |
| N | -0.812753 | -0.776040 | 0.223524  |
| C | -1.195701 | -1.937045 | -0.543945 |
| C | -0.364553 | -3.065836 | -0.545607 |
| C | 0.992422  | -3.108519 | 0.137816  |
| C | 1.117444  | -4.281448 | 1.111518  |
| C | 2.116733  | -3.145460 | -0.902286 |
| C | -0.796550 | -4.182630 | -1.254281 |
| C | -2.001455 | -4.179097 | -1.934788 |
| C | -2.777657 | -3.033695 | -1.960374 |
| C | -2.380699 | -1.880958 | -1.290018 |
| C | -3.209996 | -0.615228 | -1.445510 |
| C | -3.306649 | -0.205103 | -2.917591 |
| C | -4.602423 | -0.761402 | -0.828810 |
| C | -1.557231 | -0.189538 | 1.381333  |
| C | -1.573992 | -1.020410 | 2.685271  |
| C | -0.175573 | -1.254594 | 3.257712  |
| C | -2.268973 | -2.366371 | 2.455611  |
| C | -2.413030 | -0.222017 | 3.693128  |
| C | -0.876170 | 1.197571  | 1.513889  |
| C | 7.010515  | -0.157575 | -1.313602 |
| O | 6.302254  | -0.082200 | -0.084044 |
| H | 2.674208  | 1.155607  | 2.197763  |

|                                                  |           |           |           |   |           |           |           |
|--------------------------------------------------|-----------|-----------|-----------|---|-----------|-----------|-----------|
| H                                                | 4.903824  | 0.123432  | 2.012359  | C | -3.169320 | -2.575617 | -0.491559 |
| H                                                | 4.971203  | 1.049975  | -2.174333 | C | -3.549576 | -3.550340 | 0.427481  |
| H                                                | 2.776930  | 2.066499  | -1.991940 | C | -4.843912 | -4.051195 | 0.432626  |
| H                                                | 1.126135  | 2.842184  | 1.194972  | C | -5.775446 | -3.582799 | -0.485036 |
| H                                                | 1.391922  | 3.987908  | -0.961651 | C | -5.404220 | -2.613957 | -1.407066 |
| H                                                | 0.729577  | 2.602364  | -1.821786 | C | -4.108844 | -2.114115 | -1.408368 |
| H                                                | -0.142993 | 5.151698  | 0.775121  | N | -0.202897 | -0.533707 | 0.754598  |
| H                                                | -2.450425 | 5.894566  | 1.220742  | C | 0.778749  | -0.736202 | -0.077306 |
| H                                                | -4.349565 | 4.839574  | 0.030571  | N | 1.894341  | -0.110623 | 0.236809  |
| H                                                | -3.917400 | 3.057544  | -1.634930 | C | 3.151084  | -0.367016 | -0.427111 |
| H                                                | -1.606450 | 2.326849  | -2.092521 | C | 3.351194  | 0.104969  | -1.732756 |
| H                                                | 0.789014  | -0.170329 | -1.001782 | C | 2.275943  | 0.792974  | -2.558246 |
| H                                                | 1.120427  | -2.192041 | 0.714692  | C | 2.721304  | 2.168274  | -3.059685 |
| H                                                | 2.078964  | -4.235751 | 1.627360  | C | 1.847576  | -0.095088 | -3.730647 |
| H                                                | 0.327419  | -4.266218 | 1.865613  | C | 4.597988  | -0.108656 | -2.312315 |
| H                                                | 1.066077  | -5.239728 | 0.589953  | C | 5.606612  | -0.762531 | -1.627686 |
| H                                                | 3.089704  | -3.112773 | -0.406832 | C | 5.367945  | -1.261889 | -0.359958 |
| H                                                | 2.058290  | -2.299660 | -1.592453 | C | 4.131198  | -1.099762 | 0.256941  |
| H                                                | 2.070339  | -4.061937 | -1.495853 | C | 3.893545  | -1.762539 | 1.604878  |
| H                                                | -0.176931 | -5.072143 | -1.273137 | C | 4.108640  | -3.275890 | 1.513666  |
| H                                                | -2.325728 | -5.065833 | -2.467029 | C | 4.773352  | -1.154960 | 2.699464  |
| H                                                | -3.700022 | -3.026838 | -2.530496 | C | 1.695974  | 0.700081  | 1.478869  |
| H                                                | -2.700004 | 0.204117  | -0.935795 | C | 1.914357  | 2.225805  | 1.347595  |
| H                                                | -3.836618 | 0.746747  | -3.005801 | C | 3.362697  | 2.527923  | 0.949359  |
| H                                                | -2.315675 | -0.087425 | -3.361926 | C | 1.679260  | 2.821799  | 2.742698  |
| H                                                | -3.855178 | -0.944796 | -3.504966 | C | 0.955273  | 2.872910  | 0.347809  |
| H                                                | -5.152593 | 0.178321  | -0.915445 | C | 0.256352  | 0.292888  | 1.877516  |
| H                                                | -4.552931 | -1.030034 | 0.229460  | C | -5.099411 | 4.324630  | -0.694459 |
| H                                                | -5.177229 | -1.536441 | -1.341640 | O | -5.211510 | 3.346852  | 0.330279  |
| H                                                | -2.596100 | -0.061098 | 1.075009  | H | -1.596590 | 1.028775  | -1.184496 |
| H                                                | 0.446014  | -1.847740 | 2.585824  | H | -3.133351 | 2.906176  | -1.374500 |
| H                                                | 0.350953  | -0.322316 | 3.475204  | H | -5.258020 | 1.526781  | 2.086871  |
| H                                                | -0.256557 | -1.804557 | 4.197622  | H | -3.690567 | -0.373501 | 2.279900  |
| H                                                | -3.257423 | -2.233329 | 2.006789  | H | -1.793420 | -1.510162 | 1.613155  |
| H                                                | -2.403723 | -2.872986 | 3.413705  | H | -1.560720 | -1.530226 | -1.429948 |
| H                                                | -1.691552 | -3.027623 | 1.809333  | H | -1.050791 | -2.825275 | -0.338592 |
| H                                                | -3.424632 | -0.050723 | 3.315282  | H | -2.824574 | -3.925782 | 1.143552  |
| H                                                | -1.968960 | 0.747136  | 3.931115  | H | -5.124864 | -4.811509 | 1.152495  |
| H                                                | -2.493936 | -0.782916 | 4.626094  | H | -6.785860 | -3.975392 | -0.483456 |
| H                                                | -1.561214 | 2.019886  | 1.306644  | H | -6.124307 | -2.246284 | -2.129281 |
| H                                                | -0.428453 | 1.354888  | 2.494438  | H | -3.824169 | -1.355795 | -2.130871 |
| H                                                | 7.218441  | 0.839343  | -1.710978 | H | 0.702803  | -1.372150 | -0.949605 |
| H                                                | 7.947879  | -0.660757 | -1.090675 | H | 1.396548  | 0.945595  | -1.931995 |
| H                                                | 6.452814  | -0.737785 | -2.053585 | H | 1.898018  | 2.656949  | -3.585271 |
| $\omega$ B97X energy = -1507.41055980 a.u.       |           |           |           | H | 3.031844  | 2.818435  | -2.238850 |
| (5 <i>S</i> ,1' <i>R</i> )- <b>10b</b> , Conf. F |           |           |           | H | 3.557334  | 2.085047  | -3.757682 |
| C                                                | -2.397110 | 1.121940  | -0.455915 | H | 1.033588  | 0.378329  | -4.283783 |
| C                                                | -3.270892 | 2.195599  | -0.570728 | H | 1.504342  | -1.075357 | -3.391084 |
| C                                                | -4.306256 | 2.338032  | 0.349766  | H | 2.677225  | -0.255493 | -4.423357 |
| C                                                | -4.450578 | 1.403553  | 1.374940  | H | 4.782347  | 0.246657  | -3.319879 |
| C                                                | -3.568385 | 0.345301  | 1.475933  | H | 6.575368  | -0.902867 | -2.092952 |
| C                                                | -2.530500 | 0.187657  | 0.560737  | H | 6.151804  | -1.807052 | 0.153872  |
| C                                                | -1.593321 | -0.998567 | 0.666982  | H | 2.849624  | -1.618524 | 1.886291  |
| C                                                | -1.769681 | -2.012020 | -0.470804 | H | 3.857844  | -3.745851 | 2.467025  |
|                                                  |           |           |           | H | 3.480138  | -3.718197 | 0.738079  |
|                                                  |           |           |           | H | 5.149348  | -3.517723 | 1.286926  |

|   |           |           |           |
|---|-----------|-----------|-----------|
| H | 4.553474  | -1.618764 | 3.663296  |
| H | 4.617956  | -0.077543 | 2.797266  |
| H | 5.831863  | -1.318236 | 2.482934  |
| H | 2.403133  | 0.340587  | 2.226371  |
| H | 4.070622  | 2.042279  | 1.627038  |
| H | 3.592363  | 2.205251  | -0.065943 |
| H | 3.536345  | 3.604839  | 1.002996  |
| H | 0.656286  | 2.674367  | 3.095413  |
| H | 1.862575  | 3.897493  | 2.712733  |
| H | 2.360773  | 2.385681  | 3.478176  |
| H | -0.093811 | 2.732112  | 0.620411  |
| H | 1.096687  | 2.483901  | -0.661525 |
| H | 1.138531  | 3.948819  | 0.311314  |
| H | 0.224551  | -0.299116 | 2.793128  |
| H | -0.408693 | 1.147381  | 1.992265  |
| H | -5.213725 | 3.873975  | -1.683906 |
| H | -5.906673 | 5.032513  | -0.524358 |
| H | -4.140784 | 4.847193  | -0.637933 |

ωB97X energy = -1507.41036358 a.u.

(5*S*,1'*R*)-**10b**, Conf. G

|   |           |           |           |
|---|-----------|-----------|-----------|
| C | 3.129758  | 1.201373  | 0.893440  |
| C | 4.406102  | 0.697285  | 0.695797  |
| C | 5.022774  | 0.865570  | -0.542928 |
| C | 4.349671  | 1.541298  | -1.557637 |
| C | 3.074462  | 2.033167  | -1.343995 |
| C | 2.440799  | 1.868508  | -0.114427 |
| C | 1.028300  | 2.355130  | 0.164084  |
| C | 0.421236  | 3.241017  | -0.933190 |
| C | -1.002207 | 3.637398  | -0.632104 |
| C | -2.064140 | 2.986989  | -1.254931 |
| C | -3.377871 | 3.288869  | -0.918574 |
| C | -3.644338 | 4.254858  | 0.041953  |
| C | -2.591832 | 4.923285  | 0.655343  |
| C | -1.280936 | 4.616070  | 0.319677  |
| N | 0.149346  | 1.201071  | 0.442605  |
| C | 0.114898  | 0.094120  | -0.240892 |
| N | -0.741635 | -0.797714 | 0.207607  |
| C | -1.089947 | -1.981832 | -0.540677 |
| C | -0.189325 | -3.054880 | -0.588660 |
| C | 1.203477  | -3.007563 | 0.018166  |
| C | 1.454101  | -4.163012 | 0.988713  |
| C | 2.269416  | -2.982475 | -1.081840 |
| C | -0.587799 | -4.199261 | -1.272499 |
| C | -1.825962 | -4.274414 | -1.886007 |
| C | -2.673246 | -3.180284 | -1.870082 |
| C | -2.314349 | -2.002560 | -1.222106 |
| C | -3.226850 | -0.790721 | -1.335078 |
| C | -3.418064 | -0.389930 | -2.800443 |
| C | -4.576818 | -1.020528 | -0.653158 |
| C | -1.456761 | -0.262248 | 1.407850  |
| C | -1.374233 | -1.105189 | 2.701191  |
| C | 0.058851  | -1.282364 | 3.203526  |
| C | -2.020781 | -2.478169 | 2.489883  |
| C | -2.196634 | -0.353350 | 3.757303  |

|   |           |           |           |
|---|-----------|-----------|-----------|
| C | -0.839663 | 1.155463  | 1.527088  |
| C | 6.982298  | -0.292778 | 0.154751  |
| O | 6.263323  | 0.414072  | -0.846515 |
| H | 2.662762  | 1.062486  | 1.864111  |
| H | 4.905168  | 0.185323  | 1.507620  |
| H | 4.840053  | 1.671231  | -2.514973 |
| H | 2.582338  | 2.552515  | -2.157064 |
| H | 1.035754  | 2.921059  | 1.099168  |
| H | 1.052452  | 4.127285  | -1.030467 |
| H | 0.453499  | 2.710835  | -1.888084 |
| H | -1.862324 | 2.235455  | -2.013542 |
| H | -4.194652 | 2.770613  | -1.409806 |
| H | -4.668393 | 4.491850  | 0.306169  |
| H | -2.793223 | 5.686364  | 1.398492  |
| H | -0.463410 | 5.140039  | 0.805712  |
| H | 0.737669  | -0.081864 | -1.109993 |
| H | 1.305844  | -2.080156 | 0.582630  |
| H | 2.433669  | -4.049520 | 1.458185  |
| H | 0.701161  | -4.196632 | 1.779370  |
| H | 1.443280  | -5.125638 | 0.472670  |
| H | 3.263141  | -2.875848 | -0.640585 |
| H | 2.114899  | -2.153209 | -1.776984 |
| H | 2.254685  | -3.908826 | -1.661605 |
| H | 0.085572  | -5.047324 | -1.325408 |
| H | -2.121721 | -5.181665 | -2.399963 |
| H | -3.623050 | -3.233642 | -2.390391 |
| H | -2.744542 | 0.059206  | -0.848965 |
| H | -4.007960 | 0.528117  | -2.862810 |
| H | -2.457736 | -0.213266 | -3.290159 |
| H | -3.947434 | -1.163124 | -3.361782 |
| H | -5.189541 | -0.118452 | -0.717055 |
| H | -4.460941 | -1.277550 | 0.402796  |
| H | -5.124422 | -1.834168 | -1.134961 |
| H | -2.513914 | -0.180989 | 1.151584  |
| H | 0.678700  | -1.820769 | 2.485708  |
| H | 0.545520  | -0.330170 | 3.427196  |
| H | 0.049628  | -1.863278 | 4.128221  |
| H | -3.030917 | -2.383937 | 2.081373  |
| H | -2.096408 | -2.994692 | 3.449098  |
| H | -1.442787 | -3.111673 | 1.816700  |
| H | -3.231490 | -0.219909 | 3.430470  |
| H | -1.781231 | 0.630665  | 3.986139  |
| H | -2.209248 | -0.927086 | 4.685902  |
| H | -1.579464 | 1.943872  | 1.388544  |
| H | -0.334171 | 1.315648  | 2.478890  |
| H | 6.451048  | -1.199801 | 0.455418  |
| H | 7.933852  | -0.564092 | -0.295255 |
| H | 7.161409  | 0.335592  | 1.031097  |

ωB97X energy = -1507.41026233 a.u.

(5*S*,1'*R*)-**10b**, Conf. H

|   |           |           |           |
|---|-----------|-----------|-----------|
| C | -3.457997 | -0.597857 | -1.258243 |
| C | -4.248156 | -1.720626 | -1.025876 |
| C | -4.022248 | -2.491874 | 0.107762  |
| C | -3.007994 | -2.130429 | 0.999402  |

|   |           |           |           |
|---|-----------|-----------|-----------|
| C | -2.239061 | -1.013687 | 0.753822  |
| C | -2.453482 | -0.228482 | -0.380727 |
| C | -1.611995 | 1.005969  | -0.636637 |
| C | -1.788985 | 2.093472  | 0.430087  |
| C | -3.201776 | 2.623927  | 0.440780  |
| C | -4.127254 | 2.168582  | 1.375060  |
| C | -5.433335 | 2.639564  | 1.365073  |
| C | -5.829364 | 3.573389  | 0.417490  |
| C | -4.912382 | 4.034916  | -0.518056 |
| C | -3.607605 | 3.562110  | -0.505006 |
| N | -0.200208 | 0.623172  | -0.778583 |
| C | 0.764162  | 0.747155  | 0.088337  |
| N | 1.878630  | 0.130278  | -0.246040 |
| C | 3.122009  | 0.328611  | 0.461997  |
| C | 4.106494  | 1.134932  | -0.125296 |
| C | 3.888472  | 1.923252  | -1.407287 |
| C | 4.088514  | 3.422225  | -1.166814 |
| C | 4.794912  | 1.431020  | -2.537659 |
| C | 5.327292  | 1.248637  | 0.532501  |
| C | 5.544966  | 0.628652  | 1.749911  |
| C | 4.531360  | -0.102185 | 2.343841  |
| C | 3.300193  | -0.270195 | 1.717914  |
| C | 2.211005  | -1.044458 | 2.441854  |
| C | 2.666214  | -2.447465 | 2.847921  |
| C | 1.715776  | -0.263124 | 3.662662  |
| C | 1.706972  | -0.565478 | -1.559645 |
| C | 1.961453  | -2.091029 | -1.583630 |
| C | 1.733070  | -2.539654 | -3.034613 |
| C | 1.024171  | -2.867684 | -0.658049 |
| C | 3.417271  | -2.400778 | -1.220796 |
| C | 0.261503  | -0.154550 | -1.933850 |
| C | -5.763996 | -4.015221 | -0.446822 |
| O | -4.725778 | -3.603787 | 0.431566  |
| H | -3.640963 | -0.003535 | -2.147923 |
| H | -5.023986 | -1.976888 | -1.734632 |
| H | -2.842663 | -2.740757 | 1.879217  |
| H | -1.459951 | -0.751753 | 1.464406  |
| H | -1.896620 | 1.427768  | -1.604211 |
| H | -1.550738 | 1.690538  | 1.417986  |
| H | -1.090849 | 2.908485  | 0.221857  |
| H | -3.822683 | 1.438470  | 2.118296  |
| H | -6.142402 | 2.277465  | 2.100860  |
| H | -6.847937 | 3.944264  | 0.409944  |
| H | -5.212550 | 4.768693  | -1.257444 |
| H | -2.893371 | 3.932073  | -1.234577 |
| H | 0.678186  | 1.318309  | 1.003824  |
| H | 2.851526  | 1.799123  | -1.723056 |
| H | 3.852888  | 3.979278  | -2.076130 |
| H | 3.440814  | 3.784322  | -0.365820 |
| H | 5.122398  | 3.648075  | -0.896532 |
| H | 4.584876  | 1.979764  | -3.458098 |
| H | 4.655063  | 0.365877  | -2.737802 |
| H | 5.847451  | 1.585558  | -2.288050 |
| H | 6.114268  | 1.851879  | 0.094032  |
| H | 6.501590  | 0.733745  | 2.248437  |
| H | 4.699154  | -0.554329 | 3.314854  |

|   |           |           |           |
|---|-----------|-----------|-----------|
| H | 1.362662  | -1.162463 | 1.767183  |
| H | 1.830182  | -2.997165 | 3.285770  |
| H | 3.035226  | -3.016539 | 1.991713  |
| H | 3.462882  | -2.407464 | 3.594052  |
| H | 0.895757  | -0.798419 | 4.146342  |
| H | 1.357369  | 0.732621  | 3.389549  |
| H | 2.515904  | -0.137645 | 4.396301  |
| H | 2.410276  | -0.117594 | -2.262461 |
| H | 0.701466  | -2.390363 | -3.360761 |
| H | 2.390297  | -2.001008 | -3.722719 |
| H | 1.953355  | -3.604883 | -3.125797 |
| H | 1.194096  | -2.624963 | 0.391524  |
| H | 1.204336  | -3.938119 | -0.777493 |
| H | -0.031614 | -2.691356 | -0.879839 |
| H | 3.645083  | -2.171730 | -0.179555 |
| H | 4.112251  | -1.839610 | -1.851556 |
| H | 3.610491  | -3.464189 | -1.377193 |
| H | 0.219726  | 0.469806  | -2.826546 |
| H | -0.397595 | -1.010508 | -2.075565 |
| H | -6.191346 | -4.912924 | -0.007404 |
| H | -6.537800 | -3.247466 | -0.529821 |
| H | -5.370324 | -4.248105 | -1.439781 |

ωB97X energy = -1507.41020266 a.u.

(R)-**17a**, Conf. A

|   |           |           |           |
|---|-----------|-----------|-----------|
| C | 1.395502  | -0.269715 | 1.662579  |
| C | 0.458158  | 0.938375  | 1.822045  |
| N | 0.164585  | 1.297875  | 0.422355  |
| C | 0.582885  | 0.344773  | -0.375473 |
| N | 1.230887  | -0.611238 | 0.238141  |
| C | -0.641909 | 2.427111  | 0.050867  |
| C | 1.789850  | -1.807761 | -0.404162 |
| C | -2.014078 | 2.246472  | -0.158562 |
| C | -2.763416 | 3.373006  | -0.487170 |
| C | -2.171368 | 4.619045  | -0.597900 |
| C | -0.811255 | 4.767673  | -0.383686 |
| C | -0.017337 | 3.675753  | -0.050716 |
| C | -2.705044 | 0.896801  | -0.055529 |
| C | 1.475095  | 3.861496  | 0.157698  |
| C | -3.754400 | 0.889651  | 1.058141  |
| C | -3.327822 | 0.500588  | -1.396847 |
| C | 2.165346  | 4.206320  | -1.163981 |
| C | 1.770079  | 4.914063  | 1.227321  |
| C | 1.157898  | -3.078748 | 0.182488  |
| C | 3.306799  | -1.789914 | -0.353311 |
| C | -0.348249 | -3.068213 | 0.103034  |
| C | 4.012761  | -2.187339 | 0.779248  |
| C | 5.399599  | -2.130074 | 0.799031  |
| C | 6.095944  | -1.681240 | -0.314526 |
| C | 5.399893  | -1.288525 | -1.449297 |
| C | 4.013570  | -1.341688 | -1.465713 |
| C | -0.994910 | -3.205274 | -1.123719 |
| C | -2.377588 | -3.168598 | -1.212587 |
| C | -3.120387 | -2.993825 | -0.055954 |

|    |           |           |           |
|----|-----------|-----------|-----------|
| C  | -2.508648 | -2.856184 | 1.176564  |
| C  | -1.122612 | -2.896276 | 1.245880  |
| Cl | -4.867620 | -2.944988 | -0.156313 |
| H  | 2.439874  | -0.018080 | 1.852535  |
| H  | 1.107530  | -1.104550 | 2.298711  |
| H  | -0.475499 | 0.680583  | 2.326719  |
| H  | 0.926630  | 1.773133  | 2.340249  |
| H  | 0.405613  | 0.352075  | -1.444071 |
| H  | 1.488225  | -1.734922 | -1.451075 |
| H  | -3.829132 | 3.272229  | -0.659404 |
| H  | -2.774737 | 5.481897  | -0.855834 |
| H  | -0.358800 | 5.748231  | -0.480493 |
| H  | -1.963105 | 0.135079  | 0.198831  |
| H  | 1.895888  | 2.915604  | 0.504263  |
| H  | -4.201627 | -0.104177 | 1.144406  |
| H  | -3.313847 | 1.151754  | 2.022619  |
| H  | -4.557696 | 1.600334  | 0.848797  |
| H  | -3.805438 | -0.478053 | -1.316960 |
| H  | -2.575851 | 0.451637  | -2.187606 |
| H  | -4.091383 | 1.220018  | -1.702388 |
| H  | 3.242635  | 4.305088  | -1.013997 |
| H  | 1.993448  | 3.431137  | -1.914322 |
| H  | 1.792381  | 5.152631  | -1.564257 |
| H  | 2.845838  | 4.977252  | 1.404035  |
| H  | 1.282457  | 4.667660  | 2.173220  |
| H  | 1.426412  | 5.904169  | 0.918476  |
| H  | 1.564298  | -3.922139 | -0.379896 |
| H  | 1.469424  | -3.217531 | 1.219258  |
| H  | 3.490954  | -2.548172 | 1.658795  |
| H  | 5.936358  | -2.440462 | 1.687904  |
| H  | 7.178907  | -1.640169 | -0.298554 |
| H  | 5.935866  | -0.941497 | -2.325032 |
| H  | 3.474752  | -1.034171 | -2.356401 |
| H  | -0.414223 | -3.353019 | -2.028691 |
| H  | -2.873168 | -3.281496 | -2.168826 |
| H  | -3.102947 | -2.726694 | 2.072590  |
| H  | -0.644944 | -2.803550 | 2.215669  |

$\omega$ B97X energy = -1695.21419165 a.u.

(R)-17a, Conf. B

|   |           |           |           |
|---|-----------|-----------|-----------|
| C | 1.501517  | -0.090162 | 1.732714  |
| C | 0.601606  | 1.153322  | 1.875336  |
| N | -0.003289 | 1.274727  | 0.536457  |
| C | 0.433191  | 0.317742  | -0.245848 |
| N | 1.278591  | -0.494447 | 0.332915  |
| C | -0.862839 | 2.359560  | 0.150469  |
| C | 1.926529  | -1.653232 | -0.291929 |
| C | -0.276868 | 3.519936  | -0.369490 |
| C | -1.125981 | 4.560555  | -0.731245 |
| C | -2.496864 | 4.450176  | -0.568317 |
| C | -3.047336 | 3.295385  | -0.039379 |
| C | -2.242439 | 2.223608  | 0.335400  |
| C | 1.222277  | 3.664297  | -0.566370 |
| C | -2.876580 | 0.968167  | 0.906730  |
| C | 1.574884  | 3.694219  | -2.055580 |

|    |           |           |           |
|----|-----------|-----------|-----------|
| C  | 1.770369  | 4.898039  | 0.152815  |
| C  | -3.662036 | 1.271868  | 2.184139  |
| C  | -3.764255 | 0.282769  | -0.133961 |
| C  | 1.343623  | -2.959692 | 0.260444  |
| C  | 3.436155  | -1.512777 | -0.163524 |
| C  | -0.133768 | -3.085586 | -0.011288 |
| C  | 4.069483  | -0.500091 | -0.883068 |
| C  | 5.438058  | -0.312127 | -0.784658 |
| C  | 6.195556  | -1.139357 | 0.036715  |
| C  | 5.574533  | -2.150478 | 0.752169  |
| C  | 4.199889  | -2.336495 | 0.653958  |
| C  | -1.070234 | -2.863071 | 0.993189  |
| C  | -2.431667 | -2.960437 | 0.740119  |
| C  | -2.854038 | -3.282810 | -0.537199 |
| C  | -1.946222 | -3.507207 | -1.559063 |
| C  | -0.590943 | -3.407138 | -1.287513 |
| Cl | -4.567449 | -3.413454 | -0.868721 |
| H  | 2.557489  | 0.129828  | 1.885782  |
| H  | 1.205860  | -0.893657 | 2.406750  |
| H  | -0.180728 | 1.022785  | 2.622877  |
| H  | 1.164331  | 2.058053  | 2.106128  |
| H  | 0.124030  | 0.216758  | -1.279322 |
| H  | 1.673313  | -1.590835 | -1.353056 |
| H  | -0.709038 | 5.470668  | -1.147720 |
| H  | -3.142297 | 5.272075  | -0.856420 |
| H  | -4.122291 | 3.224076  | 0.083321  |
| H  | 1.715568  | 2.791548  | -0.132436 |
| H  | -2.081686 | 0.265948  | 1.170185  |
| H  | 2.657054  | 3.760627  | -2.187057 |
| H  | 1.222402  | 2.796008  | -2.567611 |
| H  | 1.122342  | 4.560098  | -2.545583 |
| H  | 2.856301  | 4.941026  | 0.046065  |
| H  | 1.532346  | 4.876327  | 1.218505  |
| H  | 1.359166  | 5.818899  | -0.267203 |
| H  | -4.053283 | 0.346076  | 2.611818  |
| H  | -3.032124 | 1.755548  | 2.933978  |
| H  | -4.510851 | 1.929526  | 1.981220  |
| H  | -4.213461 | -0.619786 | 0.286192  |
| H  | -3.190347 | -0.005619 | -1.018462 |
| H  | -4.574792 | 0.941982  | -0.454834 |
| H  | 1.881560  | -3.784140 | -0.212426 |
| H  | 1.528478  | -3.033939 | 1.334228  |
| H  | 3.484584  | 0.148436  | -1.528892 |
| H  | 5.916192  | 0.478338  | -1.351425 |
| H  | 7.266749  | -0.994750 | 0.115702  |
| H  | 6.158277  | -2.800884 | 1.393103  |
| H  | 3.737051  | -3.133954 | 1.222753  |
| H  | -0.739768 | -2.623056 | 1.998836  |
| H  | -3.153644 | -2.792694 | 1.530000  |
| H  | -2.293881 | -3.763704 | -2.552017 |
| H  | 0.121018  | -3.594749 | -2.084937 |

$\omega$ B97X energy = -1695.21379848 a.u.

(R)-17a, Conf. C

|   |          |          |          |
|---|----------|----------|----------|
| C | 1.516952 | 0.026798 | 2.140956 |
|---|----------|----------|----------|

|    |           |           |           |                                            |           |           |           |
|----|-----------|-----------|-----------|--------------------------------------------|-----------|-----------|-----------|
| C  | 0.781771  | -1.325853 | 2.082461  | H                                          | 3.708249  | 3.484732  | 1.511973  |
| N  | 0.183969  | -1.308797 | 0.735072  | H                                          | 6.142456  | 3.381617  | 1.121558  |
| C  | 0.475465  | -0.188048 | 0.120162  | H                                          | 7.086855  | 1.648592  | -0.374086 |
| N  | 1.210973  | 0.626374  | 0.830311  | H                                          | 5.579323  | 0.024051  | -1.479124 |
| C  | -0.604597 | -2.384849 | 0.202299  | H                                          | 3.156252  | 0.127160  | -1.099399 |
| C  | 1.767199  | 1.924299  | 0.444797  | H                                          | -0.496010 | 3.184428  | 1.412939  |
| C  | 0.050673  | -3.415398 | -0.481296 | H                                          | -2.926112 | 3.487057  | 1.479444  |
| C  | -0.731867 | -4.450552 | -0.982455 | H                                          | -3.172176 | 2.573307  | -2.696925 |
| C  | -2.104662 | -4.458291 | -0.799404 | H                                          | -0.729776 | 2.251267  | -2.767161 |
| C  | -2.724644 | -3.430186 | -0.109565 | $\omega$ B97X energy = -1695.21225979 a.u. |           |           |           |
| C  | -1.987841 | -2.371030 | 0.411514  | (R)-17a, Conf. D                           |           |           |           |
| C  | 1.552540  | -3.421942 | -0.706820 | C                                          | 0.792925  | 0.429483  | 2.296889  |
| C  | -2.695189 | -1.251778 | 1.154900  | C                                          | 2.307800  | 0.300033  | 2.051344  |
| C  | 2.197100  | -4.706984 | -0.184935 | N                                          | 2.368750  | -0.112683 | 0.637508  |
| C  | 1.881118  | -3.203328 | -2.185730 | C                                          | 1.159272  | -0.291885 | 0.162573  |
| C  | -3.591428 | -0.450779 | 0.207574  | N                                          | 0.211169  | -0.043239 | 1.027407  |
| C  | -3.492018 | -1.784856 | 2.346886  | C                                          | 3.596064  | -0.290372 | -0.088102 |
| C  | 1.073828  | 2.520141  | -0.781470 | C                                          | -1.237998 | -0.039729 | 0.813631  |
| C  | 3.267732  | 1.820317  | 0.231143  | C                                          | 4.145593  | 0.820313  | -0.739721 |
| C  | -0.427028 | 2.691544  | -0.686978 | C                                          | 5.334749  | 0.631564  | -1.435658 |
| C  | 4.117933  | 2.727589  | 0.850982  | C                                          | 5.950526  | -0.608828 | -1.469848 |
| C  | 5.488430  | 2.669582  | 0.631774  | C                                          | 5.390560  | -1.686475 | -0.805414 |
| C  | 6.017381  | 1.698591  | -0.205697 | C                                          | 4.201823  | -1.550718 | -0.094513 |
| C  | 5.172044  | 0.786075  | -0.824828 | C                                          | 3.472148  | 2.181532  | -0.734272 |
| C  | 3.803902  | 0.848198  | -0.608688 | C                                          | 3.608026  | -2.750514 | 0.621617  |
| C  | -1.064374 | 3.041866  | 0.500532  | C                                          | 4.433497  | 3.296975  | -0.323192 |
| C  | -2.439087 | 3.219673  | 0.549958  | C                                          | 2.840127  | 2.473870  | -2.097573 |
| C  | -3.182725 | 3.050637  | -0.604982 | C                                          | 3.158393  | -3.817819 | -0.379154 |
| C  | -2.578917 | 2.706330  | -1.800876 | C                                          | 4.587044  | -3.333404 | 1.642535  |
| C  | -1.204095 | 2.525977  | -1.830653 | C                                          | -1.617938 | -0.831134 | -0.445502 |
| Cl | -4.919800 | 3.251593  | -0.545004 | C                                          | -1.766117 | 1.383340  | 0.792221  |
| H  | 1.144246  | 0.677252  | 2.931955  | C                                          | -3.111656 | -1.012968 | -0.548275 |
| H  | 2.595962  | -0.085280 | 2.247326  | C                                          | -1.235287 | 2.324846  | -0.085204 |
| H  | 1.455129  | -2.177801 | 2.176314  | C                                          | -1.753396 | 3.609878  | -0.132233 |
| H  | -0.005378 | -1.411320 | 2.831642  | C                                          | -2.809658 | 3.965661  | 0.698027  |
| H  | 0.126062  | 0.028563  | -0.881420 | C                                          | -3.339168 | 3.033170  | 1.577624  |
| H  | 1.597533  | 2.579094  | 1.303353  | C                                          | -2.815900 | 1.747018  | 1.625676  |
| H  | -0.260750 | -5.262924 | -1.524458 | C                                          | -3.882528 | -0.174631 | -1.346862 |
| H  | -2.696967 | -5.273934 | -1.198136 | C                                          | -5.259688 | -0.324352 | -1.420059 |
| H  | -3.800234 | -3.451017 | 0.026608  | C                                          | -5.865315 | -1.326402 | -0.682056 |
| H  | 1.990268  | -2.590324 | -0.150111 | C                                          | -5.124005 | -2.176589 | 0.121006  |
| H  | -1.942010 | -0.564776 | 1.547602  | C                                          | -3.748665 | -2.012537 | 0.181555  |
| H  | 3.281647  | -4.654110 | -0.300705 | Cl                                         | -7.602597 | -1.526737 | -0.769299 |
| H  | 1.973740  | -4.863425 | 0.872573  | H                                          | 0.441808  | -0.197109 | 3.115546  |
| H  | 1.846462  | -5.581417 | -0.738133 | H                                          | 0.482081  | 1.459650  | 2.473610  |
| H  | 2.962925  | -3.163551 | -2.331120 | H                                          | 2.841169  | 1.240346  | 2.187398  |
| H  | 1.452275  | -2.270013 | -2.558065 | H                                          | 2.772140  | -0.464958 | 2.674510  |
| H  | 1.488533  | -4.020460 | -2.796453 | H                                          | 0.982714  | -0.620602 | -0.853372 |
| H  | -4.067267 | 0.375035  | 0.742238  | H                                          | -1.663668 | -0.553044 | 1.680091  |
| H  | -3.018963 | -0.029963 | -0.623150 | H                                          | 5.785638  | 1.465952  | -1.960827 |
| H  | -4.380762 | -1.081525 | -0.209576 | H                                          | 6.877089  | -0.735793 | -2.017965 |
| H  | -3.936953 | -0.955347 | 2.900444  | H                                          | 5.884828  | -2.650847 | -0.839931 |
| H  | -2.855100 | -2.350433 | 3.030464  | H                                          | 2.666035  | 2.164054  | 0.002607  |
| H  | -4.302977 | -2.440182 | 2.020559  | H                                          | 2.722400  | -2.422151 | 1.169914  |
| H  | 1.541364  | 3.494894  | -0.943374 |                                            |           |           |           |
| H  | 1.320582  | 1.928183  | -1.667601 |                                            |           |           |           |

|   |           |           |           |
|---|-----------|-----------|-----------|
| H | 3.894447  | 4.243475  | -0.246344 |
| H | 4.894721  | 3.087482  | 0.644212  |
| H | 5.230697  | 3.430503  | -1.058079 |
| H | 2.325661  | 3.437276  | -2.078745 |
| H | 2.114946  | 1.705296  | -2.375814 |
| H | 3.603894  | 2.512246  | -2.878614 |
| H | 2.695764  | -4.656754 | 0.145167  |
| H | 2.433276  | -3.418689 | -1.091964 |
| H | 4.009342  | -4.204304 | -0.945808 |
| H | 4.114524  | -4.152547 | 2.188732  |
| H | 4.904658  | -2.578725 | 2.365238  |
| H | 5.479750  | -3.731216 | 1.153901  |
| H | -1.255312 | -0.310044 | -1.335216 |
| H | -1.133344 | -1.810158 | -0.406357 |
| H | -0.410026 | 2.061644  | -0.741551 |
| H | -1.333880 | 4.335258  | -0.819668 |
| H | -3.216405 | 4.969526  | 0.659496  |
| H | -4.159580 | 3.305460  | 2.231422  |
| H | -3.231280 | 1.019122  | 2.315349  |
| H | -3.404553 | 0.610974  | -1.922696 |
| H | -5.854511 | 0.329674  | -2.045250 |
| H | -5.613164 | -2.959341 | 0.687158  |
| H | -3.164488 | -2.681636 | 0.805154  |

ωB97X energy = -1695.21147599 a.u.

(R)-17a, Conf. E

|   |           |           |           |
|---|-----------|-----------|-----------|
| C | -0.584721 | 0.541585  | 1.829462  |
| C | 0.097360  | -0.840210 | 1.836861  |
| N | 0.780924  | -0.868412 | 0.529891  |
| C | 0.666141  | 0.293547  | -0.065064 |
| N | -0.055837 | 1.157779  | 0.598056  |
| C | 1.584464  | -1.969009 | 0.077444  |
| C | -0.396243 | 2.517470  | 0.146915  |
| C | 2.957908  | -1.951542 | 0.344068  |
| C | 3.710292  | -3.029916 | -0.111455 |
| C | 3.112188  | -4.080557 | -0.786966 |
| C | 1.747125  | -4.076930 | -1.023090 |
| C | 0.951120  | -3.020250 | -0.593904 |
| C | 3.635150  | -0.806185 | 1.077364  |
| C | -0.538172 | -3.013731 | -0.890891 |
| C | 4.458514  | -1.301842 | 2.267190  |
| C | 4.496581  | 0.022123  | 0.120070  |
| C | -0.788931 | -2.771934 | -2.381504 |
| C | -1.224519 | -4.294971 | -0.417252 |
| C | -1.477611 | 2.477860  | -0.942354 |
| C | 0.872976  | 3.268532  | -0.235030 |
| C | -2.674054 | 1.654373  | -0.538840 |

|    |           |           |           |
|----|-----------|-----------|-----------|
| C  | 1.904574  | 3.352778  | 0.701920  |
| C  | 3.079486  | 4.020963  | 0.403872  |
| C  | 3.241476  | 4.622167  | -0.839830 |
| C  | 2.221282  | 4.548678  | -1.773031 |
| C  | 1.041357  | 3.874543  | -1.473345 |
| C  | -3.612205 | 2.152659  | 0.361953  |
| C  | -4.681850 | 1.377330  | 0.782188  |
| C  | -4.811487 | 0.087514  | 0.292956  |
| C  | -3.900895 | -0.432324 | -0.610080 |
| C  | -2.838221 | 0.359844  | -1.021833 |
| Cl | -6.157959 | -0.898285 | 0.819471  |
| H  | -1.670867 | 0.469524  | 1.764110  |
| H  | -0.315670 | 1.149179  | 2.692356  |
| H  | 0.837835  | -0.942607 | 2.631459  |
| H  | -0.613854 | -1.662251 | 1.905993  |
| H  | 1.136730  | 0.511294  | -1.016608 |
| H  | -0.820343 | 2.997945  | 1.032397  |
| H  | 4.779832  | -3.049561 | 0.065378  |
| H  | 3.716331  | -4.911533 | -1.132741 |
| H  | 1.294820  | -4.907350 | -1.553495 |
| H  | 2.863365  | -0.144070 | 1.477368  |
| H  | -0.993908 | -2.183001 | -0.346988 |
| H  | 4.866463  | -0.451806 | 2.817905  |
| H  | 3.847408  | -1.892901 | 2.952568  |
| H  | 5.298473  | -1.919794 | 1.941986  |
| H  | 4.948873  | 0.863879  | 0.649494  |
| H  | 3.908542  | 0.421326  | -0.710499 |
| H  | 5.301846  | -0.585195 | -0.301210 |
| H  | -1.861997 | -2.717482 | -2.582046 |
| H  | -0.329281 | -1.839104 | -2.717954 |
| H  | -0.375057 | -3.585373 | -2.983013 |
| H  | -2.302122 | -4.220746 | -0.578793 |
| H  | -1.050078 | -4.468756 | 0.646643  |
| H  | -0.866534 | -5.168440 | -0.967111 |
| H  | -1.781257 | 3.506058  | -1.149929 |
| H  | -1.052156 | 2.072978  | -1.863853 |
| H  | 1.787740  | 2.886791  | 1.675683  |
| H  | 3.869789  | 4.076276  | 1.143556  |
| H  | 4.160829  | 5.145254  | -1.076007 |
| H  | 2.337468  | 5.014969  | -2.744437 |
| H  | 0.260279  | 3.833461  | -2.222232 |
| H  | -3.510084 | 3.162606  | 0.745764  |
| H  | -5.408496 | 1.770826  | 1.481916  |
| H  | -4.020184 | -1.439345 | -0.991677 |
| H  | -2.129548 | -0.043166 | -1.739380 |

ωB97X energy = -1695.21094645 a.u.



**Table S11.** Cartesian coordinates and energies of the low-energy conformers of (5*S*,1'*S*)-**8a** and (5*S*,1'*R*)-**8b** calculated at the  $\omega$ B97X/TZVP PCM (solvent: methanol) level. Charge: +1.

|                                                 |           |           |           |                                                 |           |           |           |
|-------------------------------------------------|-----------|-----------|-----------|-------------------------------------------------|-----------|-----------|-----------|
| (5 <i>S</i> ,1' <i>S</i> )- <b>8a</b> , Conf. A |           |           |           | H                                               | 0.134669  | 0.337860  | 1.551366  |
|                                                 |           |           |           | H                                               | 2.156184  | 1.405629  | -1.232016 |
|                                                 |           |           |           | H                                               | 3.756466  | 3.225920  | -1.033342 |
|                                                 |           |           |           | H                                               | 3.454667  | 2.503802  | 0.551144  |
|                                                 |           |           |           | H                                               | 4.959699  | 2.153465  | -0.313235 |
|                                                 |           |           |           | H                                               | 4.865222  | 0.708215  | -2.466870 |
|                                                 |           |           |           | H                                               | 3.660960  | 1.815045  | -3.133034 |
|                                                 |           |           |           | H                                               | 3.320482  | 0.080951  | -3.041649 |
|                                                 |           |           |           | H                                               | 5.453721  | -0.052387 | -0.268550 |
|                                                 |           |           |           | H                                               | 5.720837  | -1.970252 | 1.246975  |
|                                                 |           |           |           | H                                               | 3.742467  | -3.077942 | 2.195264  |
|                                                 |           |           |           | H                                               | 0.224103  | -2.201861 | 1.339921  |
|                                                 |           |           |           | H                                               | 0.275436  | -4.549095 | 1.978580  |
|                                                 |           |           |           | H                                               | 1.212839  | -4.343468 | 0.494451  |
|                                                 |           |           |           | H                                               | 2.038036  | -4.552146 | 2.042319  |
|                                                 |           |           |           | H                                               | 0.250423  | -2.751521 | 3.752841  |
|                                                 |           |           |           | H                                               | 1.017175  | -1.183653 | 3.460004  |
|                                                 |           |           |           | H                                               | 2.007061  | -2.609327 | 3.781025  |
|                                                 |           |           |           | H                                               | 1.160215  | -0.049571 | -2.312125 |
|                                                 |           |           |           | H                                               | 2.220760  | -2.226288 | -2.781238 |
|                                                 |           |           |           | H                                               | 1.241114  | -3.695250 | -2.758683 |
|                                                 |           |           |           | H                                               | 1.784887  | -2.978282 | -1.244349 |
|                                                 |           |           |           | H                                               | -1.274570 | -1.203965 | -3.759303 |
|                                                 |           |           |           | H                                               | 0.420320  | -1.213825 | -4.271115 |
|                                                 |           |           |           | H                                               | -0.479551 | -2.727645 | -4.136235 |
|                                                 |           |           |           | H                                               | -1.903929 | -2.134858 | -1.434181 |
|                                                 |           |           |           | H                                               | -1.119265 | -3.644276 | -1.882563 |
|                                                 |           |           |           | H                                               | -0.648939 | -2.826075 | -0.396920 |
|                                                 |           |           |           | H                                               | -0.696620 | 1.351615  | -2.130515 |
|                                                 |           |           |           | H                                               | -1.739963 | -0.072099 | -2.005027 |
|                                                 |           |           |           | H                                               | -3.580927 | -2.499002 | 2.742855  |
|                                                 |           |           |           | H                                               | -1.803773 | -2.516309 | 2.789882  |
|                                                 |           |           |           | H                                               | -2.657523 | -3.243968 | 1.404900  |
|                                                 |           |           |           | $\omega$ B97X energy = -1507.41544365 a.u.      |           |           |           |
|                                                 |           |           |           | (5 <i>S</i> ,1' <i>S</i> )- <b>8a</b> , Conf. B |           |           |           |
|                                                 |           |           |           | C                                               | -3.471250 | -1.060957 | -0.822743 |
|                                                 |           |           |           | C                                               | -4.500065 | -1.989542 | -0.924587 |
|                                                 |           |           |           | C                                               | -5.580047 | -1.924583 | -0.052085 |
|                                                 |           |           |           | C                                               | -5.641852 | -0.943252 | 0.920783  |
|                                                 |           |           |           | C                                               | -4.607750 | -0.020027 | 1.016212  |
|                                                 |           |           |           | C                                               | -3.519078 | -0.056455 | 0.156832  |
|                                                 |           |           |           | C                                               | -2.437687 | 0.998458  | 0.286387  |
|                                                 |           |           |           | C                                               | -2.366482 | 1.964935  | -0.903619 |
|                                                 |           |           |           | C                                               | -1.336404 | 3.056367  | -0.722275 |
|                                                 |           |           |           | C                                               | -1.393948 | 3.922207  | 0.370014  |
|                                                 |           |           |           | C                                               | -0.433994 | 4.907117  | 0.546450  |
|                                                 |           |           |           | C                                               | 0.600703  | 5.047331  | -0.370979 |
|                                                 |           |           |           | C                                               | 0.660591  | 4.201139  | -1.467551 |
|                                                 |           |           |           | C                                               | -0.302181 | 3.213047  | -1.639338 |
|                                                 |           |           |           | N                                               | -1.130177 | 0.410602  | 0.607652  |
| C                                               | -3.564603 | -0.788032 | 0.661442  |                                                 |           |           |           |
| C                                               | -4.665271 | -1.581604 | 0.362761  |                                                 |           |           |           |
| C                                               | -5.636010 | -1.109599 | -0.513437 |                                                 |           |           |           |
| C                                               | -5.517054 | 0.141965  | -1.089371 |                                                 |           |           |           |
| C                                               | -4.411512 | 0.929170  | -0.787108 |                                                 |           |           |           |
| C                                               | -3.427416 | 0.485392  | 0.082299  |                                                 |           |           |           |
| C                                               | -2.194394 | 1.301066  | 0.418039  |                                                 |           |           |           |
| C                                               | -2.253613 | 2.775943  | 0.007043  |                                                 |           |           |           |
| C                                               | -1.013980 | 3.529866  | 0.421468  |                                                 |           |           |           |
| C                                               | -0.088444 | 3.954801  | -0.527156 |                                                 |           |           |           |
| C                                               | 1.065796  | 4.626053  | -0.143594 |                                                 |           |           |           |
| C                                               | 1.310889  | 4.877012  | 1.198607  |                                                 |           |           |           |
| C                                               | 0.392193  | 4.460004  | 2.153809  |                                                 |           |           |           |
| C                                               | -0.761194 | 3.792998  | 1.766665  |                                                 |           |           |           |
| N                                               | -1.015010 | 0.656568  | -0.173453 |                                                 |           |           |           |
| C                                               | 0.009978  | 0.198531  | 0.484502  |                                                 |           |           |           |
| N                                               | 0.890401  | -0.437300 | -0.259454 |                                                 |           |           |           |
| C                                               | 2.199552  | -0.823269 | 0.209764  |                                                 |           |           |           |
| C                                               | 3.312044  | -0.117036 | -0.269272 |                                                 |           |           |           |
| C                                               | 3.208896  | 1.135603  | -1.126364 |                                                 |           |           |           |
| C                                               | 3.887391  | 2.321518  | -0.435047 |                                                 |           |           |           |
| C                                               | 3.794418  | 0.918719  | -2.523814 |                                                 |           |           |           |
| C                                               | 4.574890  | -0.565937 | 0.104829  |                                                 |           |           |           |
| C                                               | 4.728433  | -1.637643 | 0.965395  |                                                 |           |           |           |
| C                                               | 3.612763  | -2.265114 | 1.489690  |                                                 |           |           |           |
| C                                               | 2.326625  | -1.875868 | 1.128525  |                                                 |           |           |           |
| C                                               | 1.147370  | -2.579676 | 1.782222  |                                                 |           |           |           |
| C                                               | 1.174117  | -4.092877 | 1.556695  |                                                 |           |           |           |
| C                                               | 1.102495  | -2.257812 | 3.279520  |                                                 |           |           |           |
| C                                               | 0.404105  | -0.505124 | -1.673416 |                                                 |           |           |           |
| C                                               | 0.131816  | -1.923361 | -2.227812 |                                                 |           |           |           |
| C                                               | 1.422508  | -2.748317 | -2.245852 |                                                 |           |           |           |
| C                                               | -0.330257 | -1.746816 | -3.680966 |                                                 |           |           |           |
| C                                               | -0.946646 | -2.663576 | -1.434440 |                                                 |           |           |           |
| C                                               | -0.846045 | 0.405718  | -1.607905 |                                                 |           |           |           |
| C                                               | -2.672142 | -2.434561 | 2.140188  |                                                 |           |           |           |
| O                                               | -2.567037 | -1.166886 | 1.504485  |                                                 |           |           |           |
| H                                               | -4.777620 | -2.562733 | 0.803768  |                                                 |           |           |           |
| H                                               | -6.490847 | -1.736147 | -0.740435 |                                                 |           |           |           |
| H                                               | -6.273899 | 0.509110  | -1.771430 |                                                 |           |           |           |
| H                                               | -4.325552 | 1.907797  | -1.243394 |                                                 |           |           |           |
| H                                               | -2.036301 | 1.249496  | 1.497280  |                                                 |           |           |           |
| H                                               | -2.389958 | 2.865665  | -1.072950 |                                                 |           |           |           |
| H                                               | -3.137905 | 3.212380  | 0.477105  |                                                 |           |           |           |
| H                                               | -0.276771 | 3.772404  | -1.581023 |                                                 |           |           |           |
| H                                               | 1.773406  | 4.954489  | -0.896484 |                                                 |           |           |           |
| H                                               | 2.211630  | 5.399410  | 1.499942  |                                                 |           |           |           |
| H                                               | 0.571948  | 4.659357  | 3.204158  |                                                 |           |           |           |
| H                                               | -1.478445 | 3.480722  | 2.519895  |                                                 |           |           |           |

|   |           |           |           |
|---|-----------|-----------|-----------|
| C | -0.196585 | 0.017302  | -0.211866 |
| N | 0.868765  | -0.477701 | 0.383741  |
| C | 1.905567  | -1.203143 | -0.312055 |
| C | 2.826316  | -0.514433 | -1.115087 |
| C | 2.729527  | 0.968444  | -1.435234 |
| C | 3.987416  | 1.740520  | -1.032231 |
| C | 2.432821  | 1.170152  | -2.924831 |
| C | 3.858809  | -1.250290 | -1.688950 |
| C | 3.971399  | -2.613701 | -1.484239 |
| C | 3.014145  | -3.279635 | -0.739932 |
| C | 1.949463  | -2.596743 | -0.160538 |
| C | 0.864816  | -3.395421 | 0.545956  |
| C | 0.213869  | -4.389304 | -0.420366 |
| C | 1.398075  | -4.115706 | 1.786109  |
| C | 0.708389  | -0.394856 | 1.869203  |
| C | 1.724030  | 0.510494  | 2.604762  |
| C | 1.367637  | 0.458114  | 4.096947  |
| C | 1.671238  | 1.958960  | 2.116408  |
| C | 3.142235  | -0.046471 | 2.446534  |
| C | -0.761670 | 0.070894  | 1.985296  |
| C | -2.287105 | -2.058044 | -2.647156 |
| O | -2.379912 | -1.061797 | -1.635405 |
| H | -4.472290 | -2.764159 | -1.678781 |
| H | -6.375258 | -2.655452 | -0.142715 |
| H | -6.481220 | -0.893543 | 1.603327  |
| H | -4.647214 | 0.752782  | 1.777306  |
| H | -2.682518 | 1.591243  | 1.170099  |
| H | -2.179968 | 1.415452  | -1.827620 |
| H | -3.363805 | 2.401477  | -0.998186 |
| H | -2.200976 | 3.833422  | 1.091055  |
| H | -0.495153 | 5.571551  | 1.400927  |
| H | 1.350875  | 5.817544  | -0.234075 |
| H | 1.456795  | 4.311482  | -2.195958 |
| H | -0.252572 | 2.563137  | -2.508365 |
| H | -0.289722 | 0.070785  | -1.286823 |
| H | 1.894354  | 1.396587  | -0.879582 |
| H | 3.843832  | 2.807024  | -1.222206 |
| H | 4.219162  | 1.614986  | 0.027385  |
| H | 4.855972  | 1.413593  | -1.608498 |
| H | 1.516609  | 0.657176  | -3.228525 |
| H | 3.248436  | 0.786790  | -3.542419 |
| H | 2.318215  | 2.233523  | -3.147297 |
| H | 4.589435  | -0.742914 | -2.308859 |
| H | 4.793943  | -3.162664 | -1.927791 |
| H | 3.083668  | -4.355273 | -0.622208 |
| H | 0.074071  | -2.712617 | 0.860712  |
| H | -0.622745 | -4.893400 | 0.068424  |
| H | -0.164640 | -3.882051 | -1.310775 |
| H | 0.923181  | -5.154299 | -0.743871 |
| H | 0.587615  | -4.640156 | 2.296635  |
| H | 1.855653  | -3.422561 | 2.496508  |
| H | 2.154558  | -4.854577 | 1.511038  |
| H | 0.817657  | -1.399610 | 2.276921  |
| H | 0.387014  | 0.887816  | 4.311035  |
| H | 2.103765  | 1.029231  | 4.665861  |
| H | 1.379559  | -0.569655 | 4.470074  |

|   |           |           |           |
|---|-----------|-----------|-----------|
| H | 1.945855  | 2.047343  | 1.063723  |
| H | 0.682622  | 2.408015  | 2.243094  |
| H | 2.377028  | 2.563642  | 2.690000  |
| H | 3.495049  | -0.007026 | 1.416442  |
| H | 3.833110  | 0.539079  | 3.057080  |
| H | 3.198372  | -1.085724 | 2.782799  |
| H | -1.425181 | -0.712799 | 2.355960  |
| H | -0.875232 | 0.950718  | 2.616916  |
| H | -2.294469 | -3.060523 | -2.212153 |
| H | -1.337368 | -1.886865 | -3.148908 |
| H | -3.102582 | -1.961969 | -3.367599 |

ωB97X energy = -1507.41328580 a.u.

(5S,1'S)-**8a**, Conf. C

|   |           |           |           |
|---|-----------|-----------|-----------|
| C | -1.788499 | -3.112891 | 0.208204  |
| C | -1.577446 | -4.436105 | -0.154637 |
| C | -1.840134 | -4.839319 | -1.459667 |
| C | -2.310565 | -3.936801 | -2.395366 |
| C | -2.520889 | -2.612645 | -2.023478 |
| C | -2.265945 | -2.181942 | -0.731451 |
| C | -2.479515 | -0.752009 | -0.272955 |
| C | -3.187544 | 0.159329  | -1.280790 |
| C | -3.396342 | 1.551249  | -0.737278 |
| C | -4.373787 | 1.790890  | 0.227388  |
| C | -4.540724 | 3.057536  | 0.767255  |
| C | -3.732093 | 4.106764  | 0.346467  |
| C | -2.762001 | 3.880629  | -0.619147 |
| C | -2.596074 | 2.609741  | -1.156324 |
| N | -1.193428 | -0.166402 | 0.148670  |
| C | -0.090814 | -0.177950 | -0.537984 |
| N | 0.943793  | 0.360737  | 0.078774  |
| C | 2.292828  | 0.129639  | -0.386268 |
| C | 2.864612  | 1.023765  | -1.300316 |
| C | 2.095749  | 2.168884  | -1.936119 |
| C | 2.789131  | 3.517209  | -1.732347 |
| C | 1.868568  | 1.899203  | -3.426767 |
| C | 4.187622  | 0.806749  | -1.673092 |
| C | 4.907871  | -0.261608 | -1.168474 |
| C | 4.299749  | -1.165766 | -0.315296 |
| C | 2.974040  | -1.005068 | 0.075811  |
| C | 2.320404  | -2.090980 | 0.918502  |
| C | 2.297483  | -3.417738 | 0.153013  |
| C | 3.004180  | -2.252914 | 2.277212  |
| C | 0.558810  | 0.692231  | 1.488977  |
| C | 1.000567  | 2.055239  | 2.062941  |
| C | 0.467046  | 3.248072  | 1.270520  |
| C | 2.528975  | 2.127524  | 2.144279  |
| C | 0.446814  | 2.112765  | 3.494071  |
| C | -0.973131 | 0.479761  | 1.445415  |
| C | -1.124702 | -3.519162 | 2.468731  |
| O | -1.554929 | -2.621557 | 1.453408  |
| H | -1.212711 | -5.157537 | 0.564316  |
| H | -1.672299 | -5.874071 | -1.735107 |
| H | -2.515787 | -4.252670 | -3.410725 |
| H | -2.893709 | -1.913001 | -2.761714 |

|                                            |           |           |           |   |           |           |           |
|--------------------------------------------|-----------|-----------|-----------|---|-----------|-----------|-----------|
| H                                          | -3.070658 | -0.779086 | 0.645243  | C | -6.643244 | -2.093212 | -1.398968 |
| H                                          | -2.608239 | 0.209359  | -2.206206 | C | -5.506110 | -2.106819 | -2.197095 |
| H                                          | -4.149629 | -0.297386 | -1.523675 | C | -4.250216 | -1.984358 | -1.621569 |
| H                                          | -5.014127 | 0.977871  | 0.556748  | N | -0.572416 | -0.549783 | 0.322389  |
| H                                          | -5.306391 | 3.228069  | 1.515523  | C | 0.461760  | -0.465292 | -0.464950 |
| H                                          | -3.862387 | 5.097010  | 0.767495  | N | 1.612978  | -0.357045 | 0.166125  |
| H                                          | -2.129061 | 4.694020  | -0.955901 | C | 2.896344  | -0.535748 | -0.471774 |
| H                                          | -1.835760 | 2.441990  | -1.913927 | C | 3.401265  | 0.459237  | -1.321888 |
| H                                          | -0.010725 | -0.619110 | -1.524878 | C | 2.621305  | 1.694497  | -1.747414 |
| H                                          | 1.113019  | 2.221864  | -1.465536 | C | 3.340567  | 2.994468  | -1.380192 |
| H                                          | 2.166685  | 4.321596  | -2.130601 | C | 2.340732  | 1.648846  | -3.253285 |
| H                                          | 2.973121  | 3.722879  | -0.675494 | C | 4.679829  | 0.275564  | -1.840476 |
| H                                          | 3.748789  | 3.552253  | -2.253080 | C | 5.425478  | -0.849399 | -1.537837 |
| H                                          | 1.340887  | 0.956592  | -3.588694 | C | 4.880961  | -1.843855 | -0.745681 |
| H                                          | 2.818962  | 1.848140  | -3.964051 | C | 3.599612  | -1.722344 | -0.217567 |
| H                                          | 1.274976  | 2.702737  | -3.868486 | C | 3.014138  | -2.896763 | 0.551580  |
| H                                          | 4.660261  | 1.484370  | -2.375287 | C | 2.977610  | -4.152824 | -0.323913 |
| H                                          | 5.941532  | -0.405303 | -1.461325 | C | 3.777871  | -3.166027 | 1.850090  |
| H                                          | 4.859262  | -2.024950 | 0.037518  | C | 1.375811  | -0.272763 | 1.642257  |
| H                                          | 1.277182  | -1.824381 | 1.101005  | C | 1.794601  | 1.055922  | 2.313597  |
| H                                          | 1.778407  | -4.182072 | 0.736944  | C | 3.308095  | 1.256098  | 2.190808  |
| H                                          | 1.780167  | -3.313353 | -0.803720 | C | 1.462866  | 0.925059  | 3.806725  |
| H                                          | 3.308612  | -3.780791 | -0.044544 | C | 1.053025  | 2.259371  | 1.728871  |
| H                                          | 2.482959  | -3.003254 | 2.876064  | C | -0.137957 | -0.579381 | 1.723630  |
| H                                          | 3.013422  | -1.315755 | 2.839398  | C | -1.007301 | 2.912960  | -2.244805 |
| H                                          | 4.039604  | -2.580916 | 2.158675  | O | -1.346794 | 1.800488  | -1.426028 |
| H                                          | 1.014760  | -0.072781 | 2.123820  | H | -2.317118 | 4.155513  | -0.509374 |
| H                                          | 0.820252  | 3.245226  | 0.239240  | H | -3.759484 | 4.369520  | 1.460766  |
| H                                          | 0.815712  | 4.172955  | 1.735423  | H | -4.427764 | 2.360266  | 2.751901  |
| H                                          | -0.624170 | 3.285790  | 1.251972  | H | -3.644871 | 0.142704  | 2.044101  |
| H                                          | 2.937232  | 1.271244  | 2.688687  | H | -1.954746 | -0.475315 | -1.185174 |
| H                                          | 2.998319  | 2.156146  | 1.160475  | H | -2.128201 | -2.584937 | 0.081413  |
| H                                          | 2.822150  | 3.033508  | 2.679092  | H | -2.807858 | -1.748447 | 1.462020  |
| H                                          | 0.803473  | 1.269499  | 4.091992  | H | -5.162462 | -1.739322 | 1.624919  |
| H                                          | 0.781897  | 3.032271  | 3.977670  | H | -7.393156 | -1.954896 | 0.608070  |
| H                                          | -0.645691 | 2.110245  | 3.513743  | H | -7.625087 | -2.191082 | -1.847588 |
| H                                          | -1.328019 | -0.176005 | 2.238723  | H | -5.597779 | -2.220152 | -3.271341 |
| H                                          | -1.527202 | 1.419542  | 1.475266  | H | -3.369423 | -2.012493 | -2.256243 |
| H                                          | -1.862364 | -4.308092 | 2.633302  | H | 0.382047  | -0.493362 | -1.544456 |
| H                                          | -1.022505 | -2.922289 | 3.371846  | H | 1.657098  | 1.698583  | -1.235885 |
| H                                          | -0.158802 | -3.965946 | 2.217206  | H | 2.723707  | 3.851106  | -1.661783 |
| $\omega$ B97X energy = -1507.41264740 a.u. |           |           |           | H | 3.541047  | 3.061958  | -0.309150 |
| (5S,1'S)-8a, Conf. D                       |           |           |           | H | 4.293161  | 3.083141  | -1.907325 |
| C                                          | -2.162971 | 2.011700  | -0.359159 | H | 3.272105  | 1.624891  | -3.823425 |
| C                                          | -2.604863 | 3.267715  | 0.037304  | H | 1.788597  | 2.539010  | -3.562108 |
| C                                          | -3.420162 | 3.385997  | 1.156718  | H | 1.757066  | 0.767310  | -3.530490 |
| C                                          | -3.794579 | 2.266621  | 1.878337  | H | 5.099672  | 1.030017  | -2.496140 |
| C                                          | -3.349341 | 1.013781  | 1.472219  | H | 6.424477  | -0.963006 | -1.942567 |
| C                                          | -2.540745 | 0.863249  | 0.356523  | H | 5.453888  | -2.743440 | -0.550114 |
| C                                          | -1.980545 | -0.472068 | -0.094721 | H | 1.977071  | -2.670450 | 0.804280  |
| C                                          | -2.732414 | -1.721582 | 0.372954  | H | 2.479824  | -4.965281 | 0.209787  |
| C                                          | -4.107471 | -1.842429 | -0.242058 | H | 2.435265  | -3.970942 | -1.253962 |
| C                                          | -5.252869 | -1.836161 | 0.547729  | H | 3.984758  | -4.489923 | -0.578994 |
| C                                          | -6.512626 | -1.960584 | -0.024394 | H | 3.313529  | -3.988186 | 2.398563  |
|                                            |           |           |           | H | 3.798511  | -2.289734 | 2.503022  |
|                                            |           |           |           | H | 4.813356  | -3.444904 | 1.640558  |

|   |           |           |           |
|---|-----------|-----------|-----------|
| H | 1.942359  | -1.070140 | 2.121788  |
| H | 3.852250  | 0.400662  | 2.601068  |
| H | 3.606063  | 2.142704  | 2.754804  |
| H | 3.629608  | 1.394916  | 1.159388  |
| H | 0.391464  | 0.826908  | 3.993343  |
| H | 1.967041  | 0.061162  | 4.248483  |
| H | 1.804922  | 1.818090  | 4.333145  |
| H | -0.031663 | 2.176682  | 1.844734  |
| H | 1.364828  | 3.168192  | 2.247707  |
| H | 1.269558  | 2.398005  | 0.667834  |
| H | -0.341447 | -1.562533 | 2.149398  |
| H | -0.687881 | 0.168043  | 2.292740  |
| H | -1.903639 | 3.407196  | -2.626108 |
| H | -0.438213 | 2.507028  | -3.077227 |
| H | -0.392782 | 3.631972  | -1.695334 |

$\omega$ B97X energy = -1507.41159477 a.u.

(5*S*,1'*S*)-**8a**, Conf. E

|   |           |           |           |
|---|-----------|-----------|-----------|
| C | 2.369032  | 1.914404  | -0.330989 |
| C | 3.021424  | 3.141026  | -0.288188 |
| C | 3.954565  | 3.392869  | 0.711327  |
| C | 4.238231  | 2.436214  | 1.669646  |
| C | 3.576973  | 1.215062  | 1.621781  |
| C | 2.647703  | 0.932754  | 0.632525  |
| C | 1.976659  | -0.425112 | 0.602068  |
| C | 2.336930  | -1.280873 | -0.621820 |
| C | 3.816988  | -1.570599 | -0.661458 |
| C | 4.666768  | -0.815816 | -1.464818 |
| C | 6.033778  | -1.058888 | -1.474156 |
| C | 6.567532  | -2.062448 | -0.677071 |
| C | 5.727404  | -2.823164 | 0.125646  |
| C | 4.361330  | -2.577334 | 0.131918  |
| N | 0.523927  | -0.288034 | 0.759191  |
| C | -0.395690 | -0.408921 | -0.154353 |
| N | -1.616455 | -0.158768 | 0.270346  |
| C | -2.756675 | -0.091550 | -0.612047 |
| C | -3.260280 | -1.271193 | -1.180567 |
| C | -2.615110 | -2.636761 | -1.004997 |
| C | -3.597309 | -3.673930 | -0.455951 |
| C | -2.004276 | -3.118786 | -2.324270 |
| C | -4.397618 | -1.170513 | -1.975933 |
| C | -5.015248 | 0.047660  | -2.195342 |
| C | -4.472305 | 1.202233  | -1.661022 |
| C | -3.319185 | 1.163765  | -0.883405 |
| C | -2.709136 | 2.475559  | -0.415178 |
| C | -2.419235 | 3.397962  | -1.602921 |
| C | -3.601137 | 3.186172  | 0.605728  |
| C | -1.589612 | 0.207863  | 1.721171  |
| C | -2.387351 | -0.704862 | 2.682496  |
| C | -3.878639 | -0.686679 | 2.331484  |
| C | -2.230086 | -0.101079 | 4.085296  |
| C | -1.877363 | -2.146194 | 2.687231  |
| C | -0.065480 | 0.245580  | 1.991414  |
| C | 1.185345  | 2.514692  | -2.319058 |
| O | 1.446009  | 1.584912  | -1.274857 |

|   |           |           |           |
|---|-----------|-----------|-----------|
| H | 2.812491  | 3.903858  | -1.025955 |
| H | 4.458006  | 4.352523  | 0.732151  |
| H | 4.964779  | 2.633261  | 2.448186  |
| H | 3.792840  | 0.457087  | 2.368082  |
| H | 2.306300  | -0.970765 | 1.490776  |
| H | 1.779220  | -2.219851 | -0.561683 |
| H | 2.043218  | -0.766013 | -1.537129 |
| H | 4.253665  | -0.030008 | -2.090017 |
| H | 6.682534  | -0.463121 | -2.106221 |
| H | 7.634492  | -2.253934 | -0.684119 |
| H | 6.136075  | -3.612511 | 0.746387  |
| H | 3.709124  | -3.179667 | 0.757378  |
| H | -0.186597 | -0.683666 | -1.179135 |
| H | -1.800578 | -2.549831 | -0.285465 |
| H | -3.077463 | -4.615470 | -0.266131 |
| H | -4.053556 | -3.343907 | 0.479868  |
| H | -4.399733 | -3.877056 | -1.168447 |
| H | -1.268873 | -2.409514 | -2.711941 |
| H | -2.775782 | -3.248189 | -3.087275 |
| H | -1.507081 | -4.080414 | -2.180630 |
| H | -4.810573 | -2.065243 | -2.427724 |
| H | -5.911772 | 0.099748  | -2.802213 |
| H | -4.941223 | 2.157333  | -1.869140 |
| H | -1.745564 | 2.265517  | 0.053152  |
| H | -1.880686 | 4.285329  | -1.262698 |
| H | -1.810198 | 2.894676  | -2.356387 |
| H | -3.341127 | 3.732996  | -2.083382 |
| H | -3.122855 | 4.104272  | 0.953207  |
| H | -3.809405 | 2.561098  | 1.477398  |
| H | -4.560262 | 3.455855  | 0.156624  |
| H | -2.005392 | 1.210780  | 1.816985  |
| H | -4.267592 | 0.334684  | 2.293991  |
| H | -4.437587 | -1.226762 | 3.098764  |
| H | -4.087896 | -1.161806 | 1.373267  |
| H | -1.195235 | -0.111605 | 4.434102  |
| H | -2.589531 | 0.931149  | 4.112776  |
| H | -2.820397 | -0.680481 | 4.797627  |
| H | -0.825464 | -2.218425 | 2.972971  |
| H | -2.449358 | -2.731337 | 3.410437  |
| H | -1.998799 | -2.623905 | 1.714430  |
| H | 0.302068  | 1.259809  | 2.155268  |
| H | 0.233977  | -0.372334 | 2.836673  |
| H | 0.754218  | 3.438476  | -1.924685 |
| H | 0.467205  | 2.030410  | -2.976824 |
| H | 2.096432  | 2.740578  | -2.878329 |

$\omega$ B97X energy = -1507.41131539 a.u.

(5*S*,1'*R*)-**8b**, Conf. A

|   |           |           |           |
|---|-----------|-----------|-----------|
| C | -3.752548 | 0.892950  | 0.783570  |
| C | -4.883267 | 1.662870  | 0.539355  |
| C | -5.834047 | 1.217898  | -0.372270 |
| C | -5.666821 | 0.016417  | -1.036592 |
| C | -4.532199 | -0.747663 | -0.787521 |
| C | -3.567104 | -0.329068 | 0.114540  |

|   |           |           |           |
|---|-----------|-----------|-----------|
| C | -2.310722 | -1.122976 | 0.406335  |
| C | -2.337715 | -2.582540 | -0.062613 |
| C | -1.087334 | -3.331665 | 0.327533  |
| C | -0.167757 | -3.731369 | -0.636335 |
| C | 0.997527  | -4.398817 | -0.277624 |
| C | 1.254022  | -4.678215 | 1.056236  |
| C | 0.340403  | -4.287792 | 2.028226  |
| C | -0.819462 | -3.619344 | 1.665753  |
| N | -1.149878 | -0.421079 | -0.157114 |
| C | -0.079379 | -0.087289 | 0.502428  |
| N | 0.849946  | 0.497311  | -0.224423 |
| C | 2.002626  | 1.143314  | 0.358623  |
| C | 1.968642  | 2.531593  | 0.550328  |
| C | 0.718654  | 3.375110  | 0.349647  |
| C | 0.325012  | 4.069186  | 1.657002  |
| C | 0.889666  | 4.399979  | -0.773563 |
| C | 3.129571  | 3.150327  | 1.003129  |
| C | 4.262824  | 2.414558  | 1.301623  |
| C | 4.241874  | 1.036170  | 1.184623  |
| C | 3.113988  | 0.368149  | 0.717261  |
| C | 3.131192  | -1.150968 | 0.674232  |
| C | 4.275132  | -1.696340 | -0.183096 |
| C | 3.208969  | -1.718052 | 2.095206  |
| C | 0.343057  | 0.704810  | -1.617524 |
| C | 1.260405  | 0.281227  | -2.786673 |
| C | 1.576845  | -1.214762 | -2.787829 |
| C | 2.566474  | 1.083489  | -2.771146 |
| C | 0.502993  | 0.640553  | -4.072863 |
| C | -1.014389 | -0.042101 | -1.566759 |
| C | -2.937723 | 2.436383  | 2.410883  |
| O | -2.771531 | 1.243630  | 1.655179  |
| H | -5.033197 | 2.604727  | 1.049680  |
| H | -6.712874 | 1.825113  | -0.556370 |
| H | -6.409345 | -0.329800 | -1.744825 |
| H | -4.409413 | -1.689036 | -1.309324 |
| H | -2.149830 | -1.112414 | 1.486396  |
| H | -3.215862 | -3.052279 | 0.386749  |
| H | -2.468605 | -2.634088 | -1.145687 |
| H | -0.368880 | -3.532165 | -1.684320 |
| H | 1.701954  | -4.703469 | -1.043669 |
| H | 2.159972  | -5.202302 | 1.339051  |
| H | 0.530896  | -4.507687 | 3.072606  |
| H | -1.531650 | -3.327772 | 2.432054  |
| H | 0.035736  | -0.262351 | 1.565384  |
| H | -0.112925 | 2.717778  | 0.087642  |
| H | -0.621676 | 4.598973  | 1.528962  |
| H | 0.207210  | 3.346112  | 2.467162  |
| H | 1.077245  | 4.799578  | 1.962883  |
| H | 1.684053  | 5.110897  | -0.533967 |
| H | -0.034819 | 4.964039  | -0.913364 |
| H | 1.143693  | 3.925236  | -1.724269 |
| H | 3.140146  | 4.225324  | 1.144558  |
| H | 5.157609  | 2.915197  | 1.653099  |
| H | 5.119948  | 0.464593  | 1.463571  |
| H | 2.195027  | -1.503181 | 0.236989  |
| H | 4.188095  | -2.782299 | -0.269299 |

|   |           |           |           |
|---|-----------|-----------|-----------|
| H | 4.265125  | -1.274836 | -1.190591 |
| H | 5.246787  | -1.475157 | 0.264753  |
| H | 3.182705  | -2.809240 | 2.065834  |
| H | 2.372661  | -1.375685 | 2.709944  |
| H | 4.135647  | -1.412739 | 2.587512  |
| H | 0.163184  | 1.776210  | -1.732917 |
| H | 2.309567  | -1.428893 | -3.568764 |
| H | 0.696469  | -1.824273 | -3.000805 |
| H | 1.997531  | -1.548004 | -1.838077 |
| H | 2.375968  | 2.157182  | -2.691773 |
| H | 3.224548  | 0.796173  | -1.950966 |
| H | 3.105154  | 0.909675  | -3.705109 |
| H | 0.297380  | 1.713189  | -4.123195 |
| H | 1.110254  | 0.374150  | -4.940152 |
| H | -0.445519 | 0.105180  | -4.159009 |
| H | -1.849790 | 0.590459  | -1.864370 |
| H | -1.018798 | -0.939416 | -2.187227 |
| H | -2.072040 | 2.499325  | 3.065610  |
| H | -3.848382 | 2.395823  | 3.013423  |
| H | -2.965642 | 3.313351  | 1.758765  |

ωB97X energy = -1507.41475154 a.u.

(5S,1'R)-**8b**, Conf. B

|   |           |           |           |
|---|-----------|-----------|-----------|
| C | 3.288086  | 1.690710  | -0.135593 |
| C | 3.804524  | 2.918817  | 0.256095  |
| C | 4.117209  | 3.137553  | 1.593455  |
| C | 3.923383  | 2.143817  | 2.534960  |
| C | 3.406899  | 0.915435  | 2.134760  |
| C | 3.081053  | 0.671133  | 0.810209  |
| C | 2.507541  | -0.644093 | 0.323396  |
| C | 2.582444  | -1.801003 | 1.327930  |
| C | 1.988399  | -3.070913 | 0.770616  |
| C | 0.719264  | -3.491230 | 1.158462  |
| C | 0.139884  | -4.619138 | 0.590272  |
| C | 0.828930  | -5.345329 | -0.370803 |
| C | 2.102970  | -4.943312 | -0.753126 |
| C | 2.676839  | -3.814761 | -0.185811 |
| N | 1.118368  | -0.452996 | -0.136018 |
| C | 0.179510  | 0.175044  | 0.507079  |
| N | -0.969903 | 0.242236  | -0.133155 |
| C | -2.187386 | 0.667421  | 0.516997  |
| C | -3.080693 | -0.312814 | 0.971301  |
| C | -2.773149 | -1.802350 | 0.944010  |
| C | -2.754186 | -2.378459 | 2.362447  |
| C | -3.749414 | -2.574303 | 0.054785  |
| C | -4.284079 | 0.114906  | 1.523104  |
| C | -4.566908 | 1.461912  | 1.665875  |
| C | -3.635117 | 2.408730  | 1.279422  |
| C | -2.425849 | 2.036565  | 0.699595  |
| C | -1.420043 | 3.118195  | 0.341429  |
| C | -2.012791 | 4.166592  | -0.602201 |
| C | -0.865374 | 3.781486  | 1.605808  |
| C | -0.869898 | -0.488532 | -1.435723 |
| C | -1.304323 | 0.272219  | -2.708872 |
| C | -0.494915 | 1.546038  | -2.950091 |

|   |           |           |           |
|---|-----------|-----------|-----------|
| C | -2.796831 | 0.613299  | -2.648717 |
| C | -1.086649 | -0.697193 | -3.879818 |
| C | 0.617258  | -0.926919 | -1.429895 |
| C | 3.213951  | 2.346203  | -2.429468 |
| O | 2.951506  | 1.383981  | -1.415185 |
| H | 3.968720  | 3.706901  | -0.466309 |
| H | 4.519469  | 4.099281  | 1.890317  |
| H | 4.170092  | 2.314411  | 3.575530  |
| H | 3.265023  | 0.139938  | 2.877627  |
| H | 3.049313  | -0.933254 | -0.579620 |
| H | 3.633796  | -1.952109 | 1.583096  |
| H | 2.058874  | -1.529027 | 2.247434  |
| H | 0.177645  | -2.933182 | 1.917571  |
| H | -0.850544 | -4.933134 | 0.902370  |
| H | 0.379277  | -6.225763 | -0.815008 |
| H | 2.651940  | -5.511947 | -1.495053 |
| H | 3.672913  | -3.507802 | -0.490577 |
| H | 0.322140  | 0.606816  | 1.490900  |
| H | -1.768941 | -1.948154 | 0.542825  |
| H | -2.468786 | -3.433225 | 2.334492  |
| H | -2.040356 | -1.846984 | 2.995991  |
| H | -3.737300 | -2.314268 | 2.834079  |
| H | -4.768654 | -2.507397 | 0.442863  |
| H | -3.473382 | -3.630603 | 0.018214  |
| H | -3.757035 | -2.189303 | -0.967936 |
| H | -5.003118 | -0.619773 | 1.867956  |
| H | -5.508270 | 1.774816  | 2.102578  |
| H | -3.849939 | 3.460455  | 1.431853  |
| H | -0.577806 | 2.651959  | -0.171140 |
| H | -1.239576 | 4.875284  | -0.906829 |
| H | -2.429703 | 3.710813  | -1.503179 |
| H | -2.808673 | 4.734063  | -0.114633 |
| H | -0.111695 | 4.525900  | 1.339623  |
| H | -0.401833 | 3.052533  | 2.274925  |
| H | -1.658107 | 4.287905  | 2.162083  |
| H | -1.511998 | -1.368581 | -1.363588 |
| H | -0.813844 | 2.005031  | -3.888212 |
| H | 0.576129  | 1.349757  | -3.031628 |
| H | -0.644047 | 2.280706  | -2.158684 |
| H | -3.400465 | -0.277852 | -2.455052 |
| H | -3.025789 | 1.350613  | -1.878554 |
| H | -3.113597 | 1.027193  | -3.608563 |
| H | -1.641766 | -1.627779 | -3.733396 |
| H | -1.441278 | -0.237150 | -4.804038 |
| H | -0.032454 | -0.946624 | -4.021134 |
| H | 0.733892  | -2.008567 | -1.499846 |
| H | 1.201841  | -0.453297 | -2.218496 |
| H | 2.924244  | 1.879501  | -3.368034 |
| H | 4.276316  | 2.598567  | -2.464072 |
| H | 2.622799  | 3.252440  | -2.274377 |

ωB97X energy = -1507.41306447 a.u.

(5*S*,1'*R*)-**8b**, Conf. C

|   |          |           |           |
|---|----------|-----------|-----------|
| C | 2.437060 | -1.651062 | -0.140711 |
| C | 3.137384 | -2.844715 | -0.006581 |

|   |           |           |           |
|---|-----------|-----------|-----------|
| C | 4.052455  | -2.998948 | 1.028207  |
| C | 4.271387  | -1.976600 | 1.933938  |
| C | 3.559971  | -0.790895 | 1.798435  |
| C | 2.644972  | -0.605824 | 0.772833  |
| C | 1.908637  | 0.714348  | 0.662440  |
| C | 2.246039  | 1.526515  | -0.595944 |
| C | 3.719294  | 1.845664  | -0.656148 |
| C | 4.246198  | 2.898047  | 0.087968  |
| C | 5.606704  | 3.172428  | 0.061141  |
| C | 6.458154  | 2.395176  | -0.713172 |
| C | 5.941467  | 1.345672  | -1.460904 |
| C | 4.580276  | 1.074084  | -1.431146 |
| N | 0.462464  | 0.502948  | 0.800757  |
| C | -0.465728 | 0.652016  | -0.098554 |
| N | -1.660533 | 0.248496  | 0.284085  |
| C | -2.870238 | 0.560863  | -0.440391 |
| C | -3.141513 | -0.091945 | -1.651859 |
| C | -2.172008 | -1.040636 | -2.337887 |
| C | -2.789314 | -2.416239 | -2.598412 |
| C | -1.661458 | -0.422854 | -3.643871 |
| C | -4.354084 | 0.181902  | -2.276781 |
| C | -5.260886 | 1.070923  | -1.728593 |
| C | -4.945675 | 1.744407  | -0.562277 |
| C | -3.737568 | 1.525429  | 0.092516  |
| C | -3.402658 | 2.374830  | 1.309038  |
| C | -3.403145 | 3.863271  | 0.948895  |
| C | -4.354612 | 2.099496  | 2.475257  |
| C | -1.583811 | -0.347527 | 1.654282  |
| C | -1.968743 | -1.841710 | 1.767276  |
| C | -1.819856 | -2.224485 | 3.246467  |
| C | -1.077297 | -2.743583 | 0.912125  |
| C | -3.437014 | -2.044423 | 1.379825  |
| C | -0.117630 | -0.033482 | 2.037073  |
| C | 1.327888  | -2.446865 | -2.096807 |
| O | 1.533342  | -1.421422 | -1.132946 |
| H | 2.982052  | -3.658043 | -0.702058 |
| H | 4.592423  | -3.934382 | 1.118533  |
| H | 4.984503  | -2.095800 | 2.740224  |
| H | 3.720678  | 0.015723  | 2.506786  |
| H | 2.194032  | 1.316311  | 1.530000  |
| H | 1.958297  | 0.967629  | -1.487430 |
| H | 1.671069  | 2.456274  | -0.572339 |
| H | 3.585021  | 3.513407  | 0.690926  |
| H | 6.001985  | 3.997611  | 0.642681  |
| H | 7.520592  | 2.609107  | -0.736735 |
| H | 6.598960  | 0.736793  | -2.071057 |
| H | 4.180237  | 0.252200  | -2.017260 |
| H | -0.288640 | 1.086874  | -1.072840 |
| H | -1.309925 | -1.188154 | -1.685733 |
| H | -2.036966 | -3.091053 | -3.013965 |
| H | -3.177452 | -2.867011 | -1.682614 |
| H | -3.609472 | -2.353312 | -3.317076 |
| H | -2.484240 | -0.253372 | -4.342265 |
| H | -0.948599 | -1.090947 | -4.133043 |
| H | -1.168268 | 0.537016  | -3.472528 |
| H | -4.592733 | -0.312236 | -3.211859 |

|   |           |           |           |
|---|-----------|-----------|-----------|
| H | -6.206688 | 1.256326  | -2.224320 |
| H | -5.643621 | 2.471534  | -0.162677 |
| H | -2.387970 | 2.140185  | 1.633853  |
| H | -4.399590 | 4.203489  | 0.658176  |
| H | -3.087430 | 4.454931  | 1.810904  |
| H | -2.719269 | 4.070083  | 0.123168  |
| H | -4.060897 | 2.683391  | 3.350047  |
| H | -4.360763 | 1.043573  | 2.757461  |
| H | -5.379141 | 2.376989  | 2.215621  |
| H | -2.263477 | 0.207920  | 2.300083  |
| H | -2.143141 | -3.257501 | 3.388270  |
| H | -2.441856 | -1.588223 | 3.881979  |
| H | -0.788591 | -2.154377 | 3.598631  |
| H | -1.188273 | -2.531847 | -0.152593 |

|   |           |           |           |
|---|-----------|-----------|-----------|
| H | -0.018106 | -2.651803 | 1.168125  |
| H | -1.358033 | -3.787055 | 1.069424  |
| H | -3.622817 | -1.839614 | 0.325722  |
| H | -3.723933 | -3.080411 | 1.572965  |
| H | -4.094792 | -1.400736 | 1.970714  |
| H | -0.037026 | 0.715512  | 2.826050  |
| H | 0.436395  | -0.919704 | 2.342098  |
| H | 0.910124  | -3.344679 | -1.632797 |
| H | 2.258886  | -2.695465 | -2.611254 |
| H | 0.618313  | -2.045547 | -2.816378 |

ωB97X energy = -1507.41281419 a.u.
